# Supplementary material for: Dopamine activity encodes the changing valence of the same stimulus in conditioned taste aversion paradigms
Source: eLife. 2025 Mar 5;13:RP103260. doi: 10.7554/eLife.103260 (PMC11882140; doi:10.7554/eLife.103260)
Supplement: Figure 1—source data 1. [file elife-103260-fig1-data1.xlsx]

## Sheet: Figure 1C Top
Time from infusion onset (s)	Dopamine Release to Sucrose infusion (z-score, averaged across subjects)																														Dopamine Release to Quinine infusion (z-score, averaged across subjects)
	Trial																														Trial
	1	2	3	4	5	6	7	8	9	10	11	12	13	14	15	16	17	18	19	20	21	22	23	24	25	26	27	28	29	30	1	2	3	4	5	6	7	8	9	10	11	12	13	14	15	16	17	18	19
-5	0.229078	-1.2586	-0.30311	-0.564072	0.138049	-0.398167	-0.472095	-0.5767	-0.361726	0.0308159	-0.142124	-0.803038	-0.134819	-0.753753	-0.224973	-0.106669	-0.058623	-0.00597457	-0.384032	-0.0698058	0.034394	-0.248569	-0.545266	-0.132462	0.771267	-0.145042	0.191242	-0.517026	-0.147886	0.134766	-0.544907	-1.14196	0.359798	-0.750137	-0.0951381	-0.115778	-0.346391	-0.619911	-0.317252	0.137589	-0.136787	0.238505	-0.118295	-0.338463	0.730714	-0.000225554	-0.314346	0.763952	0.228033
-4.99902	0.228759	-1.25992	-0.305455	-0.565941	0.137119	-0.399073	-0.471313	-0.576742	-0.362016	0.0307194	-0.143172	-0.804132	-0.135696	-0.754855	-0.22524	-0.108911	-0.0602506	-0.00629841	-0.384218	-0.0708908	0.0338461	-0.249108	-0.545867	-0.133193	0.769922	-0.145667	0.191324	-0.51862	-0.148654	0.134135	-0.54569	-1.14003	0.359888	-0.75117	-0.0946961	-0.115682	-0.34556	-0.621343	-0.316809	0.139015	-0.136455	0.238029	-0.117886	-0.337368	0.729737	0.00168188	-0.313914	0.763995	0.22826
-4.99803	0.228433	-1.26124	-0.307808	-0.567823	0.136174	-0.399986	-0.470555	-0.57679	-0.362322	0.030604	-0.144229	-0.805235	-0.136574	-0.755949	-0.225511	-0.111161	-0.0618881	-0.00662418	-0.384407	-0.0719917	0.033295	-0.249657	-0.546473	-0.133936	0.768559	-0.146306	0.191405	-0.520214	-0.149421	0.133499	-0.546474	-1.13809	0.359974	-0.752206	-0.0942576	-0.115587	-0.344715	-0.622768	-0.316359	0.140464	-0.136122	0.237578	-0.11747	-0.336275	0.728759	0.00359565	-0.313476	0.764029	0.228499
-4.99705	0.2281	-1.26258	-0.310171	-0.569717	0.135215	-0.400907	-0.469819	-0.576843	-0.362645	0.0304697	-0.145296	-0.806349	-0.137455	-0.757035	-0.225787	-0.113416	-0.0635355	-0.00695192	-0.3846	-0.0731085	0.0327407	-0.250216	-0.547084	-0.13469	0.767178	-0.146958	0.191487	-0.521809	-0.150185	0.132855	-0.547257	-1.13616	0.360059	-0.753246	-0.0938226	-0.115494	-0.343854	-0.624188	-0.315903	0.141936	-0.135787	0.23715	-0.117045	-0.335186	0.727781	0.0055157	-0.31303	0.764055	0.22875
-4.99607	0.227759	-1.26392	-0.312542	-0.571625	0.134243	-0.401835	-0.469106	-0.5769	-0.362984	0.0303164	-0.146371	-0.807471	-0.138338	-0.758113	-0.226068	-0.115679	-0.0651927	-0.00728164	-0.384795	-0.0742411	0.0321832	-0.250784	-0.547701	-0.135457	0.76578	-0.147623	0.191568	-0.523404	-0.150948	0.132205	-0.548041	-1.13421	0.36014	-0.754288	-0.0933911	-0.115404	-0.342979	-0.625603	-0.315442	0.14343	-0.135452	0.236746	-0.116612	-0.3341	0.726801	0.00744195	-0.312577	0.764071	0.229012
-4.99508	0.227412	-1.26527	-0.314921	-0.573546	0.133256	-0.402771	-0.468416	-0.576963	-0.36334	0.0301441	-0.147456	-0.808603	-0.139223	-0.759182	-0.226354	-0.117947	-0.0668596	-0.00761335	-0.384994	-0.0753896	0.0316226	-0.251361	-0.548323	-0.136236	0.764363	-0.1483	0.191648	-0.525	-0.151709	0.131549	-0.548825	-1.13226	0.360219	-0.755333	-0.092963	-0.115315	-0.342089	-0.627011	-0.314974	0.144946	-0.135115	0.236365	-0.116171	-0.333016	0.72582	0.00937433	-0.312117	0.764079	0.229286
-4.9941	0.227057	-1.26663	-0.317309	-0.57548	0.132256	-0.403714	-0.467749	-0.57703	-0.363712	0.0299528	-0.14855	-0.809745	-0.14011	-0.760244	-0.226644	-0.120222	-0.0685361	-0.00794708	-0.385197	-0.0765539	0.0310589	-0.251948	-0.54895	-0.137027	0.762928	-0.148991	0.191728	-0.526596	-0.152469	0.130885	-0.549609	-1.1303	0.360294	-0.756381	-0.0925384	-0.115228	-0.341185	-0.628413	-0.314502	0.146484	-0.134778	0.236008	-0.115722	-0.331935	0.724839	0.0113128	-0.311649	0.764077	0.229572
-4.99312	0.226696	-1.26799	-0.319705	-0.577426	0.131241	-0.404665	-0.467106	-0.577102	-0.364101	0.0297424	-0.149652	-0.810896	-0.140998	-0.761296	-0.22694	-0.122502	-0.0702221	-0.00828283	-0.385403	-0.077734	0.030492	-0.252544	-0.549582	-0.137829	0.761476	-0.149695	0.191808	-0.528192	-0.153227	0.130215	-0.550393	-1.12834	0.360368	-0.757432	-0.0921172	-0.115142	-0.340266	-0.62981	-0.314024	0.148044	-0.13444	0.235675	-0.115264	-0.330858	0.723857	0.0132573	-0.311174	0.764067	0.229871
-4.99214	0.226328	-1.26936	-0.32211	-0.579384	0.130213	-0.405624	-0.466487	-0.577179	-0.364507	0.0295128	-0.150764	-0.812057	-0.141888	-0.76234	-0.22724	-0.124789	-0.0719175	-0.00862063	-0.385612	-0.0789298	0.0299221	-0.25315	-0.55022	-0.138644	0.760007	-0.150412	0.191887	-0.529788	-0.153983	0.129539	-0.551177	-1.12638	0.360438	-0.758485	-0.0916994	-0.115059	-0.339332	-0.6312	-0.313541	0.149626	-0.1341	0.235366	-0.114798	-0.329784	0.722875	0.0152077	-0.310692	0.764048	0.230182
-4.99115	0.225954	-1.27074	-0.324522	-0.581355	0.129171	-0.406589	-0.465891	-0.577261	-0.36493	0.0292642	-0.151884	-0.813226	-0.142779	-0.763376	-0.227546	-0.127081	-0.0736222	-0.00896048	-0.385824	-0.0801413	0.0293492	-0.253765	-0.550863	-0.139471	0.75852	-0.151142	0.191965	-0.531384	-0.154737	0.128856	-0.551962	-1.12441	0.360507	-0.75954	-0.091285	-0.114978	-0.338383	-0.632584	-0.313053	0.151229	-0.133761	0.23508	-0.114323	-0.328713	0.721892	0.017164	-0.310202	0.764019	0.230504
-4.99017	0.225573	-1.27212	-0.326942	-0.583338	0.128115	-0.407563	-0.465319	-0.577347	-0.36537	0.0289964	-0.153013	-0.814405	-0.143672	-0.764402	-0.227857	-0.129379	-0.0753361	-0.00930241	-0.386041	-0.0813686	0.0287732	-0.254389	-0.551511	-0.14031	0.757015	-0.151886	0.192043	-0.53298	-0.155489	0.128166	-0.552746	-1.12244	0.360572	-0.760598	-0.090874	-0.114898	-0.337419	-0.633961	-0.31256	0.152854	-0.13342	0.234818	-0.113839	-0.327645	0.720909	0.0191261	-0.309705	0.763982	0.23084
-4.98919	0.225186	-1.27351	-0.32937	-0.585333	0.127045	-0.408544	-0.464771	-0.577438	-0.365827	0.0287094	-0.154151	-0.815593	-0.144565	-0.765419	-0.228173	-0.131682	-0.077059	-0.00964643	-0.38626	-0.0826116	0.0281943	-0.255022	-0.552164	-0.141161	0.755493	-0.152642	0.19212	-0.534575	-0.156239	0.12747	-0.553531	-1.12046	0.360635	-0.761657	-0.0904663	-0.11482	-0.336441	-0.635333	-0.312063	0.1545	-0.133079	0.234579	-0.113346	-0.32658	0.719925	0.0210939	-0.3092	0.763936	0.231188
-4.9882	0.224792	-1.2749	-0.331806	-0.587339	0.12596	-0.409532	-0.464248	-0.577534	-0.366302	0.0284032	-0.155297	-0.816791	-0.145459	-0.766428	-0.228494	-0.13399	-0.0787909	-0.00999256	-0.386484	-0.0838701	0.0276123	-0.255665	-0.552823	-0.142024	0.753954	-0.153411	0.192197	-0.536171	-0.156987	0.126768	-0.554315	-1.11847	0.360695	-0.762719	-0.0900619	-0.114744	-0.335448	-0.636698	-0.311561	0.156168	-0.132737	0.234364	-0.112845	-0.325519	0.718941	0.0230675	-0.308687	0.76388	0.231548
-4.98722	0.224392	-1.27631	-0.334249	-0.589358	0.124863	-0.410528	-0.463748	-0.577634	-0.366793	0.0280779	-0.156452	-0.817997	-0.146354	-0.767427	-0.228821	-0.136304	-0.0805317	-0.0103408	-0.386711	-0.0851443	0.0270275	-0.256317	-0.553487	-0.142899	0.752398	-0.154193	0.192273	-0.537766	-0.157734	0.126059	-0.5551	-1.11649	0.360753	-0.763783	-0.0896608	-0.11467	-0.334441	-0.638056	-0.311055	0.157857	-0.132395	0.234171	-0.112335	-0.324461	0.717957	0.0250466	-0.308167	0.763816	0.231921
-4.98624	0.223986	-1.27772	-0.336699	-0.591388	0.123751	-0.411531	-0.463272	-0.577739	-0.367302	0.0277334	-0.157615	-0.819213	-0.147249	-0.768417	-0.229154	-0.138622	-0.0822812	-0.0106912	-0.386941	-0.0864341	0.0264397	-0.256979	-0.554156	-0.143786	0.750824	-0.154988	0.192348	-0.53936	-0.158478	0.125343	-0.555885	-1.1145	0.360809	-0.764848	-0.089263	-0.114597	-0.333418	-0.639408	-0.310544	0.159567	-0.132052	0.234003	-0.111816	-0.323407	0.716973	0.0270313	-0.307639	0.763742	0.232306
-4.98525	0.223573	-1.27913	-0.339157	-0.593429	0.122625	-0.412542	-0.462821	-0.577849	-0.367829	0.0273697	-0.158786	-0.820437	-0.148145	-0.769397	-0.229492	-0.140946	-0.0840394	-0.0110437	-0.387176	-0.0877394	0.025849	-0.257649	-0.55483	-0.144685	0.749234	-0.155796	0.192422	-0.540954	-0.15922	0.124622	-0.55667	-1.1125	0.360862	-0.765915	-0.0888684	-0.114526	-0.332381	-0.640753	-0.31003	0.161297	-0.131709	0.233857	-0.111288	-0.322356	0.715989	0.0290215	-0.307103	0.76366	0.232705
-4.98427	0.223155	-1.28055	-0.341621	-0.595482	0.121485	-0.413561	-0.462395	-0.577963	-0.368373	0.0269868	-0.159966	-0.821671	-0.149041	-0.770368	-0.229836	-0.143274	-0.0858061	-0.0113984	-0.387414	-0.0890602	0.0252554	-0.258329	-0.555509	-0.145596	0.747627	-0.156617	0.192495	-0.542547	-0.159961	0.123893	-0.557454	-1.11051	0.360912	-0.766984	-0.0884771	-0.114457	-0.33133	-0.642091	-0.309511	0.163048	-0.131366	0.233735	-0.11075	-0.321309	0.715006	0.0310171	-0.306559	0.763568	0.233116
-4.98329	0.222731	-1.28198	-0.344093	-0.597545	0.120332	-0.414587	-0.461993	-0.578082	-0.368935	0.0265847	-0.161154	-0.822913	-0.149938	-0.771329	-0.230185	-0.145606	-0.0875812	-0.0117553	-0.387655	-0.0903965	0.0246591	-0.259018	-0.556194	-0.146518	0.746003	-0.157451	0.192568	-0.54414	-0.160699	0.123159	-0.558239	-1.10851	0.36096	-0.768054	-0.088089	-0.11439	-0.330264	-0.643423	-0.308989	0.16482	-0.131022	0.233635	-0.110204	-0.320266	0.714022	0.033018	-0.306008	0.763467	0.233541
-4.98231	0.2223	-1.28341	-0.346571	-0.59962	0.119165	-0.41562	-0.461616	-0.578205	-0.369514	0.0261634	-0.16235	-0.824165	-0.150834	-0.77228	-0.23054	-0.147943	-0.0893646	-0.0121143	-0.387901	-0.0917482	0.0240599	-0.259716	-0.556884	-0.147453	0.744362	-0.158298	0.19264	-0.545731	-0.161435	0.122418	-0.559023	-1.1065	0.361006	-0.769126	-0.087704	-0.114324	-0.329183	-0.644748	-0.308464	0.166612	-0.130679	0.233559	-0.109648	-0.319226	0.713039	0.0350242	-0.305448	0.763357	0.233978
-4.98132	0.221865	-1.28485	-0.349056	-0.601705	0.117983	-0.416661	-0.461263	-0.578333	-0.370112	0.0257229	-0.163554	-0.825425	-0.15173	-0.773221	-0.230902	-0.150284	-0.0911562	-0.0124756	-0.38815	-0.0931152	0.0234579	-0.260423	-0.557579	-0.148399	0.742705	-0.159158	0.19271	-0.547322	-0.162169	0.121671	-0.559808	-1.1045	0.361049	-0.770198	-0.0873222	-0.11426	-0.328087	-0.646065	-0.307935	0.168425	-0.130335	0.233505	-0.109083	-0.31819	0.712056	0.0370357	-0.304881	0.763238	0.234429
-4.98034	0.221423	-1.28629	-0.351547	-0.603801	0.116789	-0.417709	-0.460935	-0.578464	-0.370727	0.0252633	-0.164766	-0.826693	-0.152626	-0.774152	-0.231269	-0.152629	-0.0929558	-0.0128391	-0.388403	-0.0944976	0.0228532	-0.261139	-0.558279	-0.149357	0.741032	-0.160031	0.19278	-0.548912	-0.162901	0.120917	-0.560592	-1.10249	0.361091	-0.771272	-0.0869436	-0.114197	-0.326978	-0.647376	-0.307403	0.170257	-0.129991	0.233475	-0.108508	-0.317158	0.711074	0.0390523	-0.304305	0.76311	0.234892
-4.97936	0.220976	-1.28774	-0.354045	-0.605908	0.11558	-0.418764	-0.460633	-0.578601	-0.37136	0.0247845	-0.165986	-0.827971	-0.153521	-0.775074	-0.231642	-0.154978	-0.0947634	-0.0132048	-0.38866	-0.0958953	0.0222458	-0.261864	-0.558985	-0.150327	0.739342	-0.160916	0.192849	-0.5505	-0.163631	0.120158	-0.561377	-1.10047	0.361129	-0.772346	-0.086568	-0.114136	-0.325853	-0.648679	-0.306868	0.172109	-0.129647	0.233467	-0.107924	-0.31613	0.710092	0.0410739	-0.303722	0.762973	0.235369
-4.97837	0.220523	-1.28919	-0.356549	-0.608024	0.114358	-0.419827	-0.460355	-0.578741	-0.37201	0.0242866	-0.167214	-0.829257	-0.154415	-0.775985	-0.232021	-0.15733	-0.0965788	-0.0135727	-0.388921	-0.0973081	0.0216356	-0.262598	-0.559695	-0.151308	0.737635	-0.161814	0.192916	-0.552088	-0.164358	0.119392	-0.562161	-1.09846	0.361166	-0.773422	-0.0861955	-0.114077	-0.324714	-0.649976	-0.30633	0.173981	-0.129304	0.233482	-0.10733	-0.315106	0.709111	0.0431006	-0.30313	0.762826	0.23586
-4.97739	0.220065	-1.29065	-0.359059	-0.610151	0.113121	-0.420898	-0.460102	-0.578886	-0.372679	0.0237696	-0.16845	-0.830551	-0.155309	-0.776885	-0.232407	-0.159686	-0.0984018	-0.0139429	-0.389186	-0.0987361	0.0210228	-0.263341	-0.560411	-0.152301	0.735913	-0.162725	0.192983	-0.553674	-0.165083	0.11862	-0.562945	-1.09644	0.3612	-0.774498	-0.085826	-0.114019	-0.323561	-0.651265	-0.305789	0.175873	-0.128961	0.233519	-0.106727	-0.314086	0.708131	0.0451322	-0.30253	0.762671	0.236363
-4.97641	0.219602	-1.29212	-0.361575	-0.612288	0.111872	-0.421976	-0.459875	-0.579035	-0.373366	0.0232336	-0.169693	-0.831854	-0.156202	-0.777776	-0.232798	-0.162046	-0.100233	-0.0143153	-0.389454	-0.100179	0.0204074	-0.264093	-0.561132	-0.153306	0.734175	-0.163649	0.193049	-0.555259	-0.165806	0.117842	-0.563729	-1.09443	0.361233	-0.775574	-0.0854596	-0.113963	-0.322393	-0.652546	-0.305246	0.177783	-0.128618	0.233579	-0.106114	-0.31307	0.707152	0.0471688	-0.301922	0.762506	0.23688
-4.97542	0.219133	-1.29358	-0.364097	-0.614434	0.110608	-0.423061	-0.459673	-0.579188	-0.374071	0.0226784	-0.170943	-0.833166	-0.157093	-0.778655	-0.233197	-0.164408	-0.102071	-0.01469	-0.389727	-0.101637	0.0197894	-0.264854	-0.561858	-0.154322	0.732421	-0.164585	0.193113	-0.556842	-0.166527	0.117058	-0.564512	-1.0924	0.361263	-0.776651	-0.0850962	-0.113908	-0.321211	-0.65382	-0.3047	0.179713	-0.128275	0.233661	-0.105491	-0.312058	0.706173	0.0492101	-0.301306	0.762332	0.237411
-4.97444	0.21866	-1.29506	-0.366624	-0.61659	0.109332	-0.424153	-0.459496	-0.579345	-0.374794	0.0221043	-0.172201	-0.834485	-0.157983	-0.779524	-0.233601	-0.166774	-0.103916	-0.015067	-0.390003	-0.103111	0.0191688	-0.265623	-0.562589	-0.15535	0.730651	-0.165534	0.193177	-0.558424	-0.167245	0.116267	-0.565296	-1.09038	0.36129	-0.777728	-0.0847357	-0.113855	-0.320014	-0.655087	-0.304152	0.181662	-0.127933	0.233766	-0.104858	-0.31105	0.705196	0.0512562	-0.300681	0.762149	0.237956
-4.97346	0.218181	-1.29653	-0.369156	-0.618755	0.108041	-0.425253	-0.459344	-0.579506	-0.375536	0.0215112	-0.173466	-0.835813	-0.158872	-0.780383	-0.234012	-0.169143	-0.105769	-0.0154463	-0.390284	-0.104599	0.0185456	-0.266401	-0.563325	-0.15639	0.728865	-0.166495	0.193239	-0.560004	-0.167961	0.115471	-0.566079	-1.08836	0.361316	-0.778806	-0.0843781	-0.113803	-0.318803	-0.656346	-0.303602	0.18363	-0.127591	0.233892	-0.104216	-0.310046	0.70422	0.0533069	-0.300049	0.761957	0.238514
-4.97247	0.217698	-1.29802	-0.371694	-0.620929	0.106737	-0.42636	-0.459218	-0.579671	-0.376295	0.0208991	-0.174739	-0.837149	-0.159759	-0.78123	-0.23443	-0.171514	-0.107628	-0.0158279	-0.390568	-0.106102	0.01792	-0.267188	-0.564066	-0.157441	0.727064	-0.167469	0.1933	-0.561582	-0.168675	0.114669	-0.566862	-1.08633	0.36134	-0.779883	-0.0840234	-0.113753	-0.317578	-0.657598	-0.30305	0.185617	-0.12725	0.234041	-0.103563	-0.309047	0.703244	0.0553623	-0.299407	0.761756	0.239085
-4.97149	0.217209	-1.2995	-0.374237	-0.623113	0.10542	-0.427474	-0.459117	-0.57984	-0.377073	0.0202681	-0.176018	-0.838494	-0.160645	-0.782067	-0.234854	-0.173888	-0.109495	-0.0162118	-0.390856	-0.10762	0.0172918	-0.267984	-0.564812	-0.158503	0.725248	-0.168456	0.19336	-0.563158	-0.169387	0.11386	-0.567644	-1.08431	0.361362	-0.78096	-0.0836717	-0.113704	-0.316338	-0.658842	-0.302496	0.187621	-0.126909	0.234212	-0.102901	-0.308052	0.702271	0.0574222	-0.298758	0.761545	0.239671
-4.97051	0.216716	-1.30099	-0.376785	-0.625305	0.104089	-0.428596	-0.459042	-0.580013	-0.377869	0.0196183	-0.177304	-0.839846	-0.161528	-0.782892	-0.235285	-0.176264	-0.111368	-0.016598	-0.391149	-0.109152	0.0166612	-0.268788	-0.565563	-0.159577	0.723416	-0.169454	0.193418	-0.564733	-0.170095	0.113046	-0.568426	-1.08228	0.361381	-0.782037	-0.0833227	-0.113657	-0.315085	-0.660077	-0.301941	0.189644	-0.126569	0.234405	-0.102228	-0.307061	0.701298	0.0594866	-0.298099	0.761326	0.24027
-4.96953	0.216218	-1.30249	-0.379337	-0.627506	0.102745	-0.429724	-0.458992	-0.58019	-0.378683	0.0189496	-0.178598	-0.841206	-0.16241	-0.783707	-0.235722	-0.178643	-0.113249	-0.0169865	-0.391445	-0.110699	0.0160282	-0.269601	-0.566318	-0.160662	0.721569	-0.170466	0.193476	-0.566305	-0.170802	0.112226	-0.569208	-1.08025	0.361399	-0.783114	-0.0829766	-0.113611	-0.313817	-0.661306	-0.301384	0.191686	-0.12623	0.234619	-0.101545	-0.306075	0.700327	0.0615555	-0.297433	0.761097	0.240884
-4.96854	0.215715	-1.30399	-0.381894	-0.629715	0.101387	-0.43086	-0.458968	-0.58037	-0.379516	0.0182622	-0.179898	-0.842574	-0.163289	-0.78451	-0.236167	-0.181023	-0.115135	-0.0173774	-0.391745	-0.112261	0.0153927	-0.270422	-0.567079	-0.161758	0.719708	-0.171489	0.193532	-0.567876	-0.171506	0.1114	-0.56999	-1.07822	0.361415	-0.78419	-0.0826332	-0.113566	-0.312534	-0.662526	-0.300826	0.193744	-0.125892	0.234855	-0.100852	-0.305093	0.699357	0.0636286	-0.296758	0.760859	0.241511
-4.96756	0.215208	-1.30549	-0.384456	-0.631933	0.100016	-0.432003	-0.458969	-0.580554	-0.380367	0.0175561	-0.181205	-0.84395	-0.164165	-0.785302	-0.236618	-0.183406	-0.117028	-0.0177706	-0.39205	-0.113838	0.014755	-0.271252	-0.567845	-0.162865	0.717831	-0.172525	0.193587	-0.569444	-0.172208	0.110569	-0.570771	-1.0762	0.361429	-0.785265	-0.0822926	-0.113523	-0.311238	-0.663738	-0.300267	0.195821	-0.125555	0.235112	-0.100148	-0.304116	0.698389	0.0657061	-0.296074	0.760613	0.242152
-4.96658	0.214697	-1.30699	-0.387022	-0.634159	0.0986323	-0.433153	-0.458996	-0.580742	-0.381237	0.0168313	-0.182518	-0.845334	-0.165039	-0.786082	-0.237076	-0.18579	-0.118928	-0.0181661	-0.392358	-0.115429	0.0141149	-0.27209	-0.568615	-0.163984	0.71594	-0.173573	0.19364	-0.57101	-0.172907	0.109731	-0.571552	-1.07417	0.361441	-0.78634	-0.0819548	-0.11348	-0.309928	-0.664942	-0.299706	0.197915	-0.125219	0.235391	-0.0994347	-0.303143	0.697423	0.0677878	-0.295382	0.760357	0.242808
-4.96559	0.214181	-1.3085	-0.389592	-0.636392	0.0972351	-0.43431	-0.459049	-0.580933	-0.382125	0.016088	-0.183838	-0.846725	-0.165911	-0.786851	-0.237542	-0.188175	-0.120833	-0.018564	-0.39267	-0.117034	0.0134725	-0.272937	-0.56939	-0.165114	0.714034	-0.174633	0.193693	-0.572574	-0.173603	0.108888	-0.572333	-1.07214	0.361451	-0.787414	-0.0816196	-0.11344	-0.308604	-0.666138	-0.299145	0.200026	-0.124884	0.235691	-0.0987106	-0.302175	0.696459	0.0698736	-0.294681	0.760092	0.243478
-4.96461	0.213661	-1.31001	-0.392166	-0.638634	0.0958249	-0.435475	-0.459127	-0.581128	-0.383031	0.0153261	-0.185164	-0.848124	-0.166779	-0.787609	-0.238014	-0.190563	-0.122745	-0.0189643	-0.392987	-0.118653	0.0128278	-0.273791	-0.57017	-0.166254	0.712114	-0.175705	0.193744	-0.574135	-0.174298	0.108039	-0.573113	-1.07011	0.36146	-0.788487	-0.081287	-0.1134	-0.307265	-0.667326	-0.298584	0.202155	-0.12455	0.236013	-0.097976	-0.301212	0.695496	0.0719634	-0.293971	0.759817	0.244161
-4.96363	0.213137	-1.31153	-0.394743	-0.640882	0.0944016	-0.436646	-0.459232	-0.581326	-0.383956	0.0145457	-0.186496	-0.84953	-0.167644	-0.788354	-0.238494	-0.192951	-0.124662	-0.0193669	-0.393307	-0.120287	0.0121809	-0.274654	-0.570954	-0.167406	0.710179	-0.17679	0.193793	-0.575693	-0.174989	0.107185	-0.573892	-1.06808	0.361466	-0.789558	-0.0809571	-0.113362	-0.305913	-0.668506	-0.298021	0.2043	-0.124218	0.236355	-0.0972309	-0.300253	0.694535	0.0740573	-0.293253	0.759534	0.244859
-4.96264	0.212609	-1.31305	-0.397324	-0.643139	0.0929654	-0.437824	-0.459362	-0.581528	-0.3849	0.013747	-0.187835	-0.850943	-0.168506	-0.789088	-0.238981	-0.19534	-0.126585	-0.0197718	-0.393631	-0.121935	0.0115318	-0.275525	-0.571743	-0.168569	0.70823	-0.177886	0.193841	-0.577249	-0.175678	0.106325	-0.574671	-1.06605	0.361471	-0.790628	-0.0806297	-0.113325	-0.304547	-0.669677	-0.297459	0.206462	-0.123887	0.236718	-0.0964753	-0.299299	0.693576	0.0761552	-0.292526	0.759242	0.245572
-4.96166	0.212077	-1.31457	-0.399909	-0.645402	0.0915162	-0.439009	-0.459517	-0.581732	-0.385861	0.0129299	-0.189179	-0.852364	-0.169365	-0.78981	-0.239475	-0.19773	-0.128514	-0.0201792	-0.39396	-0.123597	0.0108805	-0.276404	-0.572537	-0.169742	0.706268	-0.178994	0.193888	-0.578803	-0.176364	0.105459	-0.57545	-1.06402	0.361474	-0.791697	-0.0803049	-0.113289	-0.303167	-0.67084	-0.296896	0.20864	-0.123557	0.237102	-0.095709	-0.298349	0.69262	0.0782569	-0.29179	0.758941	0.246298
-4.96068	0.211541	-1.31609	-0.402497	-0.647672	0.0900542	-0.440201	-0.459699	-0.58194	-0.386842	0.0120946	-0.19053	-0.853792	-0.17022	-0.79052	-0.239976	-0.200121	-0.130448	-0.0205889	-0.394292	-0.125273	0.0102271	-0.277292	-0.573335	-0.170926	0.704291	-0.180114	0.193933	-0.580353	-0.177048	0.104589	-0.576228	-1.06199	0.361476	-0.792764	-0.0799827	-0.113254	-0.301773	-0.671994	-0.296333	0.210834	-0.123229	0.237506	-0.094932	-0.297405	0.691665	0.0803624	-0.291045	0.75863	0.247039
-4.9597	0.211001	-1.31762	-0.405087	-0.649949	0.0885795	-0.4414	-0.459906	-0.582151	-0.38784	0.0112411	-0.191886	-0.855228	-0.171071	-0.791218	-0.240485	-0.202512	-0.132387	-0.021001	-0.394628	-0.126963	0.00957163	-0.278187	-0.574138	-0.172121	0.702301	-0.181246	0.193977	-0.5819	-0.177729	0.103712	-0.577005	-1.05997	0.361476	-0.79383	-0.0796629	-0.11322	-0.300366	-0.67314	-0.295771	0.213045	-0.122902	0.237931	-0.0941443	-0.296465	0.690713	0.0824716	-0.290292	0.758311	0.247795
-4.95871	0.210457	-1.31915	-0.407681	-0.652232	0.0870921	-0.442605	-0.460139	-0.582365	-0.388857	0.0103696	-0.193248	-0.85667	-0.171919	-0.791904	-0.241001	-0.204903	-0.134332	-0.0214155	-0.394969	-0.128667	0.00891407	-0.27909	-0.574945	-0.173326	0.700297	-0.182389	0.19402	-0.583445	-0.178407	0.10283	-0.577782	-1.05794	0.361474	-0.794893	-0.0793455	-0.113188	-0.298945	-0.674278	-0.295208	0.215271	-0.122577	0.238377	-0.0933459	-0.295531	0.689762	0.0845846	-0.289529	0.757983	0.248564
-4.95773	0.20991	-1.32068	-0.410277	-0.654521	0.085592	-0.443817	-0.460397	-0.582582	-0.389893	0.00947999	-0.194615	-0.858119	-0.172762	-0.792578	-0.241525	-0.207295	-0.136281	-0.0218323	-0.395313	-0.130384	0.00825447	-0.28	-0.575757	-0.174542	0.69828	-0.183544	0.194061	-0.584986	-0.179083	0.101943	-0.578559	-1.05592	0.361471	-0.795955	-0.0790306	-0.113156	-0.29751	-0.675407	-0.294646	0.217512	-0.122254	0.238842	-0.0925366	-0.294601	0.688815	0.0867011	-0.288758	0.757646	0.249349
-4.95675	0.209359	-1.32221	-0.412876	-0.656817	0.0840794	-0.445036	-0.460682	-0.582802	-0.390947	0.00857249	-0.195987	-0.859575	-0.173601	-0.79324	-0.242056	-0.209686	-0.138236	-0.0222516	-0.395661	-0.132116	0.00759287	-0.280919	-0.576573	-0.175769	0.69625	-0.184711	0.194101	-0.586524	-0.179756	0.101051	-0.579334	-1.05389	0.361466	-0.797014	-0.078718	-0.113126	-0.296062	-0.676527	-0.294085	0.219769	-0.121932	0.239327	-0.0917165	-0.293676	0.687869	0.0888212	-0.287978	0.757299	0.250147
-4.95576	0.208805	-1.32375	-0.415478	-0.659119	0.0825543	-0.446262	-0.460992	-0.583025	-0.39202	0.00764717	-0.197365	-0.861038	-0.174436	-0.793889	-0.242595	-0.212078	-0.140195	-0.0226732	-0.396013	-0.13386	0.0069293	-0.281845	-0.577393	-0.177005	0.694207	-0.185889	0.194139	-0.588059	-0.180427	0.100153	-0.580109	-1.05187	0.36146	-0.798071	-0.0784078	-0.113096	-0.2946	-0.677638	-0.293524	0.222041	-0.121612	0.239833	-0.0908854	-0.292756	0.686927	0.0909447	-0.287189	0.756944	0.250961
-4.95478	0.208248	-1.32529	-0.418081	-0.661426	0.0810168	-0.447494	-0.461328	-0.583251	-0.393111	0.00670411	-0.198748	-0.862507	-0.175266	-0.794526	-0.243142	-0.214468	-0.142159	-0.0230972	-0.396369	-0.135618	0.00626381	-0.282779	-0.578218	-0.178252	0.692151	-0.187078	0.194175	-0.589591	-0.181094	0.0992508	-0.580884	-1.04985	0.361452	-0.799126	-0.0780999	-0.113068	-0.293125	-0.678741	-0.292964	0.224327	-0.121295	0.240358	-0.0900434	-0.291841	0.685987	0.0930716	-0.286391	0.75658	0.251789
-4.9538	0.207687	-1.32683	-0.420686	-0.663739	0.079467	-0.448733	-0.46169	-0.583479	-0.39422	0.0057434	-0.200136	-0.863983	-0.176092	-0.79515	-0.243696	-0.216859	-0.144127	-0.0235236	-0.396729	-0.13739	0.00559642	-0.28372	-0.579046	-0.17951	0.690082	-0.188279	0.194211	-0.591119	-0.181759	0.0983429	-0.581657	-1.04784	0.361443	-0.800178	-0.0777942	-0.11304	-0.291636	-0.679834	-0.292405	0.226629	-0.120979	0.240902	-0.0891904	-0.290931	0.685049	0.0952019	-0.285584	0.756207	0.252631
-4.95281	0.207123	-1.32837	-0.423293	-0.666056	0.077905	-0.449978	-0.462077	-0.58371	-0.395348	0.00476515	-0.201529	-0.865466	-0.176912	-0.795762	-0.244258	-0.219248	-0.146099	-0.0239524	-0.397093	-0.139174	0.00492716	-0.284668	-0.579879	-0.180777	0.688	-0.189491	0.194244	-0.592643	-0.182421	0.09743	-0.58243	-1.04582	0.361433	-0.801227	-0.0774908	-0.113014	-0.290134	-0.680919	-0.291848	0.228944	-0.120666	0.241466	-0.0883263	-0.290027	0.684114	0.0973354	-0.284769	0.755825	0.253488
-4.95183	0.206556	-1.32991	-0.425902	-0.668379	0.0763309	-0.45123	-0.46249	-0.583943	-0.396494	0.00376945	-0.202927	-0.866955	-0.177728	-0.796361	-0.244828	-0.221637	-0.148076	-0.0243836	-0.397461	-0.140972	0.00425608	-0.285624	-0.580716	-0.182054	0.685907	-0.190714	0.194277	-0.594164	-0.18308	0.0965121	-0.583202	-1.04381	0.361421	-0.802274	-0.0771896	-0.112988	-0.288619	-0.681995	-0.291291	0.231274	-0.120354	0.242049	-0.0874511	-0.289127	0.683182	0.0994721	-0.283944	0.755435	0.25436
-4.95085	0.205986	-1.33145	-0.428512	-0.670707	0.0747446	-0.452488	-0.462929	-0.584179	-0.397659	0.00275641	-0.204329	-0.86845	-0.178538	-0.796947	-0.245406	-0.224024	-0.150056	-0.0248172	-0.397832	-0.142783	0.0035832	-0.286588	-0.581557	-0.183342	0.683801	-0.191948	0.194307	-0.595681	-0.183737	0.0955892	-0.583973	-1.0418	0.361408	-0.803317	-0.0768905	-0.112963	-0.287091	-0.683062	-0.290736	0.233618	-0.120045	0.242651	-0.0865649	-0.288233	0.682253	0.101612	-0.28311	0.755035	0.255246
-4.94986	0.205413	-1.333	-0.431124	-0.67304	0.0731465	-0.453752	-0.463393	-0.584417	-0.398841	0.00172613	-0.205735	-0.869951	-0.179343	-0.797521	-0.245992	-0.22641	-0.152041	-0.0252531	-0.398208	-0.144607	0.00290857	-0.287558	-0.582402	-0.184639	0.681683	-0.193192	0.194337	-0.597194	-0.18439	0.0946614	-0.584744	-1.03979	0.361393	-0.804358	-0.0765936	-0.112939	-0.285549	-0.68412	-0.290183	0.235975	-0.119739	0.243273	-0.0856674	-0.287344	0.681327	0.103755	-0.282267	0.754627	0.256148
-4.94888	0.204837	-1.33454	-0.433736	-0.675376	0.0715364	-0.455022	-0.463882	-0.584657	-0.400043	0.000678728	-0.207146	-0.871458	-0.180142	-0.798082	-0.246585	-0.228795	-0.154029	-0.0256914	-0.398587	-0.146444	0.00223222	-0.288536	-0.58325	-0.185946	0.679553	-0.194448	0.194364	-0.598703	-0.185041	0.0937288	-0.585513	-1.03778	0.361378	-0.805395	-0.0762987	-0.112916	-0.283995	-0.685169	-0.289632	0.238345	-0.119435	0.243912	-0.0847588	-0.28646	0.680403	0.105901	-0.281415	0.75421	0.257063
-4.9479	0.204258	-1.33609	-0.436349	-0.677717	0.0699146	-0.456299	-0.464398	-0.5849	-0.401262	-0.000385697	-0.208561	-0.872972	-0.180936	-0.79863	-0.247187	-0.231178	-0.15602	-0.0261321	-0.398969	-0.148293	0.00155417	-0.28952	-0.584102	-0.187262	0.677412	-0.195715	0.19439	-0.600209	-0.185689	0.0927914	-0.586282	-1.03578	0.361361	-0.806428	-0.0760059	-0.112894	-0.282427	-0.686208	-0.289082	0.240729	-0.119133	0.244571	-0.0838389	-0.285581	0.679483	0.10805	-0.280554	0.753784	0.257994
-4.94692	0.203677	-1.33764	-0.438963	-0.680062	0.068281	-0.457582	-0.464938	-0.585144	-0.402499	-0.00146703	-0.20998	-0.874491	-0.181724	-0.799165	-0.247797	-0.233559	-0.158015	-0.0265752	-0.399356	-0.150155	0.000874482	-0.290512	-0.584959	-0.188589	0.675259	-0.196992	0.194415	-0.60171	-0.186334	0.0918493	-0.58705	-1.03378	0.361343	-0.807458	-0.075715	-0.112872	-0.280847	-0.687239	-0.288534	0.243126	-0.118834	0.245248	-0.0829077	-0.284708	0.678566	0.110201	-0.279684	0.75335	0.258939
-4.94593	0.203093	-1.33918	-0.441577	-0.682411	0.0666359	-0.458871	-0.465505	-0.585391	-0.403755	-0.00256514	-0.211404	-0.876016	-0.182505	-0.799686	-0.248415	-0.235938	-0.160014	-0.0270206	-0.399746	-0.152029	0.000193174	-0.29151	-0.585818	-0.189924	0.673095	-0.19828	0.194438	-0.603207	-0.186976	0.0909025	-0.587817	-1.03178	0.361324	-0.808485	-0.0754262	-0.112852	-0.279254	-0.68826	-0.287989	0.245535	-0.118538	0.245943	-0.0819652	-0.28384	0.677652	0.112356	-0.278804	0.752907	0.259899
-4.94495	0.202506	-1.34073	-0.444192	-0.684764	0.0649793	-0.460165	-0.466096	-0.585639	-0.405029	-0.00367993	-0.21283	-0.877546	-0.183281	-0.800195	-0.249041	-0.238315	-0.162015	-0.0274684	-0.40014	-0.153916	-0.000489714	-0.292515	-0.586682	-0.191269	0.67092	-0.199578	0.19446	-0.604699	-0.187615	0.0899511	-0.588583	-1.02979	0.361304	-0.809507	-0.0751392	-0.112832	-0.277648	-0.689272	-0.287446	0.247957	-0.118244	0.246656	-0.0810114	-0.282978	0.676742	0.114513	-0.277916	0.752455	0.260874
-4.94397	0.201918	-1.34228	-0.446807	-0.687119	0.0633113	-0.461466	-0.466713	-0.58589	-0.406321	-0.00481127	-0.214261	-0.879082	-0.18405	-0.800691	-0.249675	-0.240689	-0.164019	-0.0279186	-0.400538	-0.155816	-0.00117414	-0.293527	-0.587548	-0.192624	0.668733	-0.200887	0.19448	-0.606188	-0.188251	0.0889952	-0.589347	-1.0278	0.361282	-0.810526	-0.0748542	-0.112812	-0.276029	-0.690274	-0.286905	0.25039	-0.117953	0.247387	-0.0800462	-0.282121	0.675834	0.116673	-0.277019	0.751994	0.261864
-4.94298	0.201326	-1.34383	-0.449421	-0.689478	0.061632	-0.462773	-0.467355	-0.586142	-0.407631	-0.00595903	-0.215695	-0.880624	-0.184813	-0.801173	-0.250318	-0.243061	-0.166026	-0.0283711	-0.400939	-0.157727	-0.00186008	-0.294545	-0.588419	-0.193987	0.666536	-0.202206	0.194499	-0.607671	-0.188884	0.0880348	-0.590111	-1.02582	0.36126	-0.81154	-0.0745709	-0.112793	-0.274398	-0.691267	-0.286367	0.252836	-0.117665	0.248135	-0.0790696	-0.281269	0.67493	0.118835	-0.276112	0.751525	0.262868
-4.942	0.200733	-1.34538	-0.452036	-0.691839	0.0599415	-0.464085	-0.468022	-0.586395	-0.408958	-0.00712308	-0.217132	-0.882171	-0.185569	-0.801642	-0.250968	-0.24543	-0.168035	-0.028826	-0.401343	-0.15965	-0.00254749	-0.29557	-0.589292	-0.19536	0.664329	-0.203535	0.194516	-0.609151	-0.189514	0.0870699	-0.590874	-1.02384	0.361237	-0.81255	-0.0742895	-0.112775	-0.272754	-0.692251	-0.285832	0.255293	-0.117381	0.248901	-0.0780816	-0.280423	0.67403	0.121	-0.275196	0.751047	0.263887
-4.94102	0.200137	-1.34692	-0.454649	-0.694204	0.0582399	-0.465403	-0.468715	-0.586651	-0.410304	-0.00830331	-0.218572	-0.883723	-0.186318	-0.802098	-0.251628	-0.247796	-0.170047	-0.0292832	-0.401752	-0.161586	-0.00323633	-0.296601	-0.590169	-0.196741	0.662111	-0.204874	0.194532	-0.610625	-0.190142	0.0861007	-0.591635	-1.02186	0.361212	-0.813556	-0.0740099	-0.112758	-0.271098	-0.693225	-0.2853	0.257761	-0.117099	0.249685	-0.0770822	-0.279582	0.673133	0.123167	-0.274271	0.750561	0.264921
-4.94003	0.199539	-1.34847	-0.457262	-0.69657	0.0565274	-0.466726	-0.469432	-0.586907	-0.411668	-0.00949958	-0.220016	-0.88528	-0.18706	-0.802541	-0.252295	-0.250158	-0.172062	-0.0297427	-0.402163	-0.163533	-0.00392657	-0.297639	-0.591049	-0.198132	0.659883	-0.206223	0.194546	-0.612095	-0.190766	0.0851272	-0.592396	-1.01989	0.361187	-0.814557	-0.0737319	-0.112741	-0.26943	-0.69419	-0.28477	0.260241	-0.11682	0.250485	-0.0760712	-0.278746	0.672239	0.125337	-0.273338	0.750067	0.26597
-4.93905	0.198939	-1.35002	-0.459875	-0.698939	0.054804	-0.468056	-0.470174	-0.587166	-0.413049	-0.0107117	-0.221462	-0.886842	-0.187795	-0.80297	-0.252971	-0.252518	-0.174078	-0.0302046	-0.402578	-0.165492	-0.00461817	-0.298682	-0.591932	-0.199531	0.657645	-0.207582	0.194558	-0.61356	-0.191387	0.0841495	-0.593155	-1.01792	0.361161	-0.815553	-0.0734557	-0.112724	-0.267749	-0.695145	-0.284244	0.262731	-0.116545	0.251302	-0.0750487	-0.277917	0.671349	0.127509	-0.272394	0.749563	0.267033
-4.93807	0.198338	-1.35156	-0.462486	-0.70131	0.0530698	-0.46939	-0.470942	-0.587425	-0.414448	-0.0119397	-0.222911	-0.888409	-0.188523	-0.803385	-0.253655	-0.254874	-0.176096	-0.0306688	-0.402997	-0.167462	-0.00531109	-0.299732	-0.592818	-0.200939	0.655398	-0.208951	0.194569	-0.61502	-0.192005	0.0831676	-0.593913	-1.01595	0.361134	-0.816544	-0.0731811	-0.112708	-0.266056	-0.696091	-0.283721	0.265232	-0.116273	0.252137	-0.0740148	-0.277092	0.670463	0.129683	-0.271442	0.749052	0.268112
-4.93709	0.197734	-1.35311	-0.465096	-0.703683	0.0513251	-0.47073	-0.471734	-0.587686	-0.415865	-0.0131833	-0.224363	-0.889981	-0.189243	-0.803787	-0.254348	-0.257226	-0.178116	-0.0311352	-0.403419	-0.169444	-0.0060053	-0.300788	-0.593708	-0.202355	0.65314	-0.210329	0.194579	-0.616475	-0.19262	0.0821816	-0.59467	-1.01399	0.361107	-0.817531	-0.0729081	-0.112693	-0.264351	-0.697027	-0.283202	0.267744	-0.116004	0.252987	-0.0729692	-0.276274	0.66958	0.131859	-0.270481	0.748532	0.269205
-4.9361	0.197128	-1.35465	-0.467704	-0.706057	0.0495697	-0.472075	-0.47255	-0.587947	-0.417299	-0.0144423	-0.225817	-0.891558	-0.189955	-0.804176	-0.255049	-0.259575	-0.180138	-0.031604	-0.403844	-0.171437	-0.00670076	-0.301849	-0.5946	-0.20378	0.650874	-0.211717	0.194587	-0.617925	-0.193232	0.0811916	-0.595425	-1.01204	0.361078	-0.818512	-0.0726366	-0.112678	-0.262633	-0.697953	-0.282686	0.270265	-0.115739	0.253854	-0.0719121	-0.27546	0.668701	0.134038	-0.26951	0.748003	0.270312
-4.93512	0.196521	-1.3562	-0.470311	-0.708433	0.047804	-0.473426	-0.473392	-0.58821	-0.418751	-0.0157167	-0.227273	-0.893139	-0.19066	-0.80455	-0.255758	-0.261919	-0.182161	-0.0320751	-0.404272	-0.173442	-0.00739742	-0.302917	-0.595494	-0.205213	0.648598	-0.213114	0.194594	-0.619369	-0.193841	0.0801976	-0.596179	-1.01009	0.361049	-0.819488	-0.0723667	-0.112663	-0.260904	-0.69887	-0.282174	0.272796	-0.115478	0.254737	-0.0708434	-0.274653	0.667826	0.136218	-0.268531	0.747466	0.271435
-4.93414	0.195912	-1.35774	-0.472916	-0.710809	0.046028	-0.474781	-0.474258	-0.588474	-0.42022	-0.0170063	-0.228732	-0.894724	-0.191357	-0.804912	-0.256477	-0.264259	-0.184186	-0.0325484	-0.404703	-0.175457	-0.00809526	-0.30399	-0.596392	-0.206654	0.646313	-0.21452	0.194599	-0.620809	-0.194447	0.0791998	-0.596932	-1.00814	0.361019	-0.820458	-0.0720982	-0.112649	-0.259163	-0.699777	-0.281666	0.275336	-0.11522	0.255637	-0.0697631	-0.273851	0.666955	0.138401	-0.267542	0.746921	0.272572
-4.93315	0.195302	-1.35928	-0.475519	-0.713187	0.0442418	-0.476141	-0.475148	-0.588738	-0.421707	-0.018311	-0.230192	-0.896314	-0.192045	-0.805259	-0.257203	-0.266595	-0.186212	-0.033024	-0.405138	-0.177483	-0.00879424	-0.305069	-0.597292	-0.208103	0.644019	-0.215936	0.194603	-0.622243	-0.19505	0.078198	-0.597684	-1.00621	0.360988	-0.821423	-0.0718312	-0.112636	-0.25741	-0.700674	-0.281161	0.277886	-0.114965	0.256551	-0.0686712	-0.273055	0.666088	0.140585	-0.266544	0.746368	0.273724
-4.93217	0.19469	-1.36082	-0.478119	-0.715565	0.0424456	-0.477507	-0.476063	-0.589003	-0.42321	-0.0196306	-0.231654	-0.897908	-0.192726	-0.805593	-0.257939	-0.268926	-0.188238	-0.0335018	-0.405576	-0.179521	-0.00949431	-0.306153	-0.598194	-0.20956	0.641717	-0.217361	0.194605	-0.623671	-0.19565	0.0771926	-0.598433	-1.00427	0.360957	-0.822383	-0.0715655	-0.112622	-0.255646	-0.701562	-0.280661	0.280444	-0.114715	0.257482	-0.0675676	-0.272264	0.665225	0.142771	-0.265538	0.745806	0.274891
-4.93119	0.194077	-1.36235	-0.480717	-0.717944	0.0406394	-0.478877	-0.477002	-0.589269	-0.424731	-0.0209649	-0.233118	-0.899506	-0.193397	-0.805913	-0.258683	-0.271252	-0.190266	-0.0339819	-0.406016	-0.181568	-0.0101954	-0.307243	-0.599099	-0.211025	0.639407	-0.218795	0.194606	-0.625094	-0.196246	0.0761834	-0.599182	-1.00234	0.360925	-0.823336	-0.0713012	-0.112609	-0.25387	-0.70244	-0.280165	0.283011	-0.114468	0.258428	-0.0664524	-0.271479	0.664365	0.144959	-0.264522	0.745237	0.276072
-4.9302	0.193462	-1.36389	-0.483313	-0.720323	0.0388234	-0.480252	-0.477965	-0.589535	-0.426269	-0.0223138	-0.234583	-0.901108	-0.194061	-0.806219	-0.259435	-0.273573	-0.192294	-0.0344642	-0.40646	-0.183627	-0.0108976	-0.308338	-0.600006	-0.212498	0.637088	-0.220237	0.194606	-0.626511	-0.196839	0.0751706	-0.599929	-1.00042	0.360893	-0.824283	-0.0710383	-0.112596	-0.252082	-0.703308	-0.279673	0.285587	-0.114226	0.259388	-0.0653255	-0.2707	0.66351	0.147149	-0.263497	0.744659	0.277268
-4.92922	0.192846	-1.36542	-0.485905	-0.722701	0.0369978	-0.481632	-0.478952	-0.589802	-0.427824	-0.0236772	-0.23605	-0.902714	-0.194715	-0.806511	-0.260197	-0.275889	-0.194323	-0.0349487	-0.406907	-0.185695	-0.0116007	-0.309438	-0.600916	-0.213978	0.634762	-0.221688	0.194604	-0.627923	-0.197429	0.0741542	-0.600674	-0.998507	0.36086	-0.825224	-0.0707765	-0.112584	-0.250283	-0.704166	-0.279186	0.28817	-0.113987	0.260364	-0.0641869	-0.269926	0.662659	0.14934	-0.262462	0.744073	0.278478
-4.92824	0.192229	-1.36695	-0.488495	-0.72508	0.0351626	-0.483016	-0.479963	-0.590069	-0.429396	-0.0250549	-0.237518	-0.904323	-0.195361	-0.80679	-0.260967	-0.2782	-0.196352	-0.0354354	-0.407356	-0.187774	-0.0123048	-0.310543	-0.601827	-0.215465	0.632428	-0.223148	0.194601	-0.629328	-0.198016	0.0731344	-0.601418	-0.996597	0.360826	-0.826159	-0.070516	-0.112571	-0.248473	-0.705014	-0.278703	0.290762	-0.113753	0.261355	-0.0630367	-0.269159	0.661812	0.151532	-0.261419	0.743479	0.279703
-4.92726	0.191611	-1.36848	-0.491081	-0.727458	0.033318	-0.484405	-0.480998	-0.590336	-0.430984	-0.0264467	-0.238987	-0.905936	-0.195998	-0.807054	-0.261745	-0.280505	-0.198381	-0.0359243	-0.407808	-0.189863	-0.0130098	-0.311653	-0.602741	-0.21696	0.630086	-0.224616	0.194596	-0.630728	-0.1986	0.0721112	-0.60216	-0.994694	0.360792	-0.827088	-0.0702567	-0.112559	-0.246651	-0.705852	-0.278225	0.29336	-0.113523	0.26236	-0.0618748	-0.268397	0.660969	0.153726	-0.260367	0.742876	0.280943
-4.92627	0.190992	-1.37	-0.493664	-0.729835	0.0314642	-0.485798	-0.482056	-0.590603	-0.43259	-0.0278524	-0.240457	-0.907553	-0.196625	-0.807305	-0.262533	-0.282804	-0.200411	-0.0364153	-0.408263	-0.191962	-0.0137156	-0.312768	-0.603657	-0.218462	0.627737	-0.226093	0.19459	-0.632122	-0.19918	0.0710846	-0.6029	-0.992797	0.360758	-0.828009	-0.0699985	-0.112547	-0.244818	-0.70668	-0.277752	0.295966	-0.113297	0.263379	-0.0607011	-0.26764	0.66013	0.155922	-0.259306	0.742266	0.282197
-4.92529	0.190371	-1.37152	-0.496243	-0.732212	0.0296011	-0.487195	-0.483138	-0.59087	-0.434212	-0.029272	-0.241927	-0.909172	-0.197243	-0.807541	-0.263329	-0.285097	-0.20244	-0.0369085	-0.408721	-0.194071	-0.0144223	-0.313887	-0.604574	-0.219971	0.625381	-0.227578	0.194583	-0.633509	-0.199757	0.0700547	-0.603639	-0.990907	0.360723	-0.828924	-0.0697414	-0.112535	-0.242975	-0.707499	-0.277283	0.298579	-0.113075	0.264412	-0.0595158	-0.26689	0.659296	0.158119	-0.258236	0.741648	0.283466
-4.92431	0.18975	-1.37304	-0.498819	-0.734587	0.0277291	-0.488596	-0.484243	-0.591138	-0.43585	-0.0307052	-0.243398	-0.910796	-0.197852	-0.807764	-0.264134	-0.287385	-0.204469	-0.0374038	-0.409181	-0.19619	-0.0151298	-0.315011	-0.605493	-0.221487	0.623018	-0.229071	0.194574	-0.634891	-0.200331	0.0690217	-0.604375	-0.989023	0.360688	-0.829833	-0.0694853	-0.112524	-0.24112	-0.708307	-0.27682	0.301199	-0.112858	0.265459	-0.0583188	-0.266145	0.658466	0.160317	-0.257157	0.741022	0.284749
-4.92332	0.189128	-1.37456	-0.50139	-0.736961	0.0258482	-0.490001	-0.485372	-0.591405	-0.437504	-0.0321518	-0.244869	-0.912422	-0.198451	-0.807972	-0.264947	-0.289666	-0.206497	-0.0379012	-0.409644	-0.198318	-0.015838	-0.31614	-0.606414	-0.22301	0.620648	-0.230571	0.194564	-0.636266	-0.200902	0.0679855	-0.60511	-0.987146	0.360652	-0.830734	-0.0692302	-0.112512	-0.239255	-0.709106	-0.276362	0.303825	-0.112645	0.26652	-0.05711	-0.265406	0.65764	0.162516	-0.256069	0.740388	0.286047
-4.92234	0.188505	-1.37607	-0.503957	-0.739333	0.0239585	-0.491411	-0.486524	-0.591671	-0.439175	-0.0336118	-0.246341	-0.914051	-0.19904	-0.808167	-0.26577	-0.291941	-0.208525	-0.0384007	-0.410109	-0.200455	-0.0165469	-0.317273	-0.607336	-0.224539	0.618272	-0.23208	0.194553	-0.637634	-0.201469	0.0669463	-0.605843	-0.985276	0.360617	-0.831628	-0.0689761	-0.112501	-0.237378	-0.709894	-0.275909	0.306457	-0.112437	0.267595	-0.0558896	-0.264673	0.656819	0.164716	-0.254972	0.739746	0.287359
-4.92136	0.187882	-1.37758	-0.50652	-0.741703	0.0220602	-0.492824	-0.487698	-0.591938	-0.440862	-0.0350849	-0.247812	-0.915683	-0.19962	-0.808347	-0.266601	-0.294209	-0.210552	-0.0389023	-0.410577	-0.202602	-0.0172566	-0.31841	-0.60826	-0.226075	0.61589	-0.233596	0.19454	-0.638996	-0.202033	0.0659041	-0.606574	-0.983414	0.36058	-0.832514	-0.068723	-0.112489	-0.235491	-0.710673	-0.275462	0.309094	-0.112233	0.268682	-0.0546574	-0.263945	0.656002	0.166918	-0.253866	0.739097	0.288685
-4.92037	0.187258	-1.37909	-0.509078	-0.744072	0.0201535	-0.494241	-0.488896	-0.592204	-0.442565	-0.036571	-0.249283	-0.917317	-0.200189	-0.808514	-0.267441	-0.29647	-0.212578	-0.0394059	-0.411047	-0.204757	-0.0179668	-0.319552	-0.609184	-0.227617	0.613502	-0.23512	0.194526	-0.640352	-0.202594	0.0648591	-0.607303	-0.981558	0.360544	-0.833394	-0.0684706	-0.112478	-0.233594	-0.711441	-0.27502	0.311738	-0.112034	0.269782	-0.0534135	-0.263224	0.655189	0.16912	-0.252751	0.738439	0.290025
-4.91939	0.186633	-1.38059	-0.511631	-0.746438	0.0182385	-0.495661	-0.490116	-0.592469	-0.444284	-0.0380698	-0.250754	-0.918955	-0.200748	-0.808666	-0.268289	-0.298724	-0.214603	-0.0399116	-0.411519	-0.206922	-0.0186776	-0.320697	-0.610111	-0.229166	0.611108	-0.236651	0.194511	-0.641701	-0.203152	0.0638112	-0.608031	-0.979711	0.360507	-0.834265	-0.0682191	-0.112466	-0.231686	-0.712199	-0.274584	0.314386	-0.11184	0.270895	-0.052158	-0.262508	0.654381	0.171323	-0.251628	0.737774	0.29138
-4.91841	0.186008	-1.38209	-0.514179	-0.748801	0.0163153	-0.497085	-0.491359	-0.592734	-0.446019	-0.0395813	-0.252225	-0.920594	-0.201296	-0.808804	-0.269147	-0.300971	-0.216626	-0.0404192	-0.411993	-0.209095	-0.019389	-0.321847	-0.611038	-0.23072	0.608708	-0.23819	0.194495	-0.643043	-0.203706	0.0627605	-0.608756	-0.97787	0.360471	-0.835129	-0.0679684	-0.112455	-0.229768	-0.712948	-0.274153	0.317039	-0.111651	0.272021	-0.0508907	-0.261798	0.653577	0.173527	-0.250495	0.737101	0.292749
-4.91742	0.185382	-1.38358	-0.516722	-0.751162	0.014384	-0.498512	-0.492624	-0.592997	-0.447769	-0.0411051	-0.253695	-0.922236	-0.201834	-0.808928	-0.270013	-0.303211	-0.218648	-0.0409289	-0.412469	-0.211277	-0.0201009	-0.323	-0.611966	-0.23228	0.606304	-0.239735	0.194478	-0.644378	-0.204256	0.0617072	-0.609478	-0.976038	0.360434	-0.835985	-0.0677185	-0.112443	-0.22784	-0.713686	-0.273729	0.319697	-0.111467	0.273159	-0.0496118	-0.261094	0.652778	0.175732	-0.249354	0.736421	0.294132
-4.91644	0.184756	-1.38508	-0.519259	-0.75352	0.0124449	-0.499943	-0.493912	-0.59326	-0.449535	-0.0426413	-0.255164	-0.923881	-0.202362	-0.809038	-0.270888	-0.305443	-0.220669	-0.0414405	-0.412948	-0.213468	-0.0208133	-0.324157	-0.612895	-0.233846	0.603894	-0.241288	0.194459	-0.645707	-0.204804	0.0606513	-0.610199	-0.974213	0.360397	-0.836833	-0.0674692	-0.112431	-0.225901	-0.714414	-0.27331	0.322359	-0.111288	0.274309	-0.0483211	-0.260396	0.651984	0.177938	-0.248205	0.735733	0.295529
-4.91546	0.18413	-1.38656	-0.521791	-0.755874	0.010498	-0.501376	-0.495221	-0.593522	-0.451316	-0.0441895	-0.256632	-0.925527	-0.202879	-0.809134	-0.271772	-0.307668	-0.222687	-0.0419541	-0.413428	-0.215667	-0.0215261	-0.325317	-0.613825	-0.235418	0.601479	-0.242848	0.19444	-0.647028	-0.205348	0.0595929	-0.610917	-0.972397	0.360359	-0.837673	-0.0672206	-0.11242	-0.223953	-0.715133	-0.272897	0.325025	-0.111114	0.275471	-0.0470188	-0.259704	0.651194	0.180144	-0.247046	0.735037	0.296941
-4.91448	0.183503	-1.38804	-0.524317	-0.758225	0.00854352	-0.502813	-0.496553	-0.593783	-0.453112	-0.0457496	-0.258099	-0.927175	-0.203384	-0.809216	-0.272665	-0.309884	-0.224704	-0.0424696	-0.41391	-0.217874	-0.0222393	-0.326481	-0.614755	-0.236995	0.59906	-0.244414	0.194419	-0.648342	-0.205888	0.0585321	-0.611634	-0.970588	0.360322	-0.838505	-0.0669726	-0.112408	-0.221995	-0.715841	-0.272491	0.327695	-0.110945	0.276644	-0.0457049	-0.259017	0.650408	0.18235	-0.245879	0.734334	0.298366
-4.91349	0.182876	-1.38952	-0.526837	-0.760573	0.00658162	-0.504252	-0.497906	-0.594043	-0.454924	-0.0473214	-0.259565	-0.928825	-0.203879	-0.809284	-0.273566	-0.312093	-0.226718	-0.0429869	-0.414394	-0.220088	-0.0229528	-0.327648	-0.615686	-0.238578	0.596636	-0.245987	0.194397	-0.649649	-0.206426	0.0574689	-0.612347	-0.968788	0.360285	-0.839328	-0.0667252	-0.112396	-0.220027	-0.716539	-0.27209	0.330369	-0.110782	0.277829	-0.0443793	-0.258337	0.649628	0.184557	-0.244703	0.733624	0.299805
-4.91251	0.182249	-1.39099	-0.52935	-0.762916	0.00461243	-0.505695	-0.499281	-0.594301	-0.45675	-0.0489047	-0.261029	-0.930477	-0.204363	-0.809337	-0.274477	-0.314293	-0.228731	-0.0435062	-0.41488	-0.222311	-0.0236667	-0.328818	-0.616618	-0.240166	0.594208	-0.247566	0.194374	-0.650949	-0.206959	0.0564034	-0.613059	-0.966997	0.360247	-0.840143	-0.0664782	-0.112383	-0.218049	-0.717227	-0.271696	0.333045	-0.110623	0.279025	-0.043042	-0.257662	0.648852	0.186765	-0.243519	0.732906	0.301258
-4.91153	0.181622	-1.39246	-0.531858	-0.765256	0.0026361	-0.507139	-0.500677	-0.594558	-0.458591	-0.0504994	-0.262491	-0.93213	-0.204835	-0.809376	-0.275396	-0.316485	-0.230741	-0.0440273	-0.415367	-0.224542	-0.0243808	-0.329992	-0.61755	-0.241758	0.591776	-0.249151	0.19435	-0.652241	-0.20749	0.0553357	-0.613768	-0.965214	0.36021	-0.840949	-0.0662318	-0.112371	-0.216062	-0.717905	-0.271309	0.335724	-0.11047	0.280232	-0.0416931	-0.256993	0.64808	0.188973	-0.242326	0.73218	0.302724
-4.91054	0.180995	-1.39392	-0.534358	-0.767591	0.000652798	-0.508587	-0.502095	-0.594813	-0.460447	-0.0521052	-0.263952	-0.933785	-0.205296	-0.809401	-0.276324	-0.318669	-0.232748	-0.0445502	-0.415856	-0.22678	-0.0250952	-0.331168	-0.618482	-0.243356	0.589341	-0.250743	0.194325	-0.653526	-0.208017	0.0542659	-0.614474	-0.963439	0.360173	-0.841746	-0.0659858	-0.112358	-0.214065	-0.718572	-0.270928	0.338406	-0.110323	0.28145	-0.0403326	-0.25633	0.647314	0.191181	-0.241125	0.731447	0.304205
-4.90956	0.180368	-1.39538	-0.536852	-0.769922	-0.00133733	-0.510037	-0.503533	-0.595067	-0.462317	-0.0537219	-0.26541	-0.935441	-0.205745	-0.809412	-0.277261	-0.320843	-0.234752	-0.0450749	-0.416346	-0.229025	-0.0258098	-0.332347	-0.619414	-0.244958	0.586902	-0.252341	0.194299	-0.654804	-0.20854	0.053194	-0.615178	-0.961674	0.360135	-0.842534	-0.0657402	-0.112345	-0.212059	-0.71923	-0.270554	0.34109	-0.110181	0.282678	-0.0389606	-0.255673	0.646552	0.193389	-0.239916	0.730707	0.305699
-4.90858	0.179741	-1.39683	-0.539339	-0.772248	-0.00333413	-0.511488	-0.504993	-0.595319	-0.464202	-0.0553495	-0.266867	-0.937098	-0.206182	-0.809409	-0.278206	-0.323009	-0.236754	-0.0456013	-0.416838	-0.231277	-0.0265245	-0.333529	-0.620346	-0.246565	0.58446	-0.253944	0.194273	-0.656074	-0.20906	0.0521202	-0.615879	-0.959917	0.360098	-0.843313	-0.0654949	-0.112332	-0.210043	-0.719878	-0.270186	0.343775	-0.110045	0.283916	-0.037577	-0.255021	0.645795	0.195597	-0.238698	0.72996	0.307206
-4.90759	0.179115	-1.39828	-0.541818	-0.774569	-0.00533744	-0.512943	-0.506473	-0.595569	-0.466101	-0.0569876	-0.268321	-0.938756	-0.206608	-0.809392	-0.27916	-0.325166	-0.238752	-0.0461295	-0.417331	-0.233537	-0.0272394	-0.334713	-0.621277	-0.248176	0.582015	-0.255553	0.194245	-0.657336	-0.209576	0.0510445	-0.616578	-0.95817	0.360061	-0.844083	-0.0652499	-0.112318	-0.208019	-0.720516	-0.269825	0.346463	-0.109914	0.285164	-0.0361818	-0.254376	0.645042	0.197805	-0.237471	0.729206	0.308727
-4.90661	0.178488	-1.39972	-0.544291	-0.776884	-0.0073471	-0.514399	-0.507974	-0.595818	-0.468014	-0.0586361	-0.269772	-0.940415	-0.207021	-0.809361	-0.280123	-0.327313	-0.240747	-0.0466594	-0.417825	-0.235803	-0.0279543	-0.335899	-0.622209	-0.249792	0.579567	-0.257168	0.194216	-0.65859	-0.210089	0.049967	-0.617273	-0.956432	0.360024	-0.844843	-0.0650052	-0.112304	-0.205986	-0.721143	-0.269471	0.349151	-0.109789	0.286422	-0.0347751	-0.253736	0.644295	0.200014	-0.236237	0.728444	0.310262
-4.90563	0.177862	-1.40115	-0.546755	-0.779194	-0.00936295	-0.515856	-0.509495	-0.596064	-0.469941	-0.0602947	-0.271221	-0.942075	-0.207423	-0.809315	-0.281095	-0.329451	-0.242739	-0.047191	-0.41832	-0.238076	-0.0286692	-0.337088	-0.62314	-0.251411	0.577116	-0.258788	0.194187	-0.659836	-0.210599	0.0488878	-0.617966	-0.954703	0.359987	-0.845594	-0.0647607	-0.11229	-0.203943	-0.721761	-0.269125	0.351841	-0.10967	0.287689	-0.0333569	-0.253103	0.643552	0.202222	-0.234994	0.727675	0.31181
-4.90465	0.177236	-1.40258	-0.549212	-0.781499	-0.0113848	-0.517316	-0.511037	-0.596308	-0.471881	-0.0619634	-0.272667	-0.943735	-0.207812	-0.809256	-0.282075	-0.331579	-0.244727	-0.0477242	-0.418816	-0.240355	-0.0293842	-0.338279	-0.624071	-0.253035	0.574663	-0.260414	0.194157	-0.661074	-0.211105	0.047807	-0.618657	-0.952983	0.359951	-0.846335	-0.0645164	-0.112275	-0.201892	-0.722368	-0.268785	0.354531	-0.109557	0.288966	-0.0319272	-0.252475	0.642814	0.20443	-0.233743	0.7269	0.313371
-4.90366	0.17661	-1.404	-0.55166	-0.783798	-0.0134126	-0.518777	-0.512598	-0.59655	-0.473836	-0.0636419	-0.27411	-0.945396	-0.208189	-0.809182	-0.283064	-0.333698	-0.246711	-0.048259	-0.419313	-0.242641	-0.030099	-0.339473	-0.625001	-0.254662	0.572209	-0.262045	0.194126	-0.662305	-0.211607	0.0467245	-0.619344	-0.951273	0.359914	-0.847067	-0.0642722	-0.11226	-0.199833	-0.722966	-0.268452	0.357222	-0.10945	0.290252	-0.0304861	-0.251853	0.64208	0.206638	-0.232484	0.726117	0.314945
-4.90268	0.175985	-1.40542	-0.554101	-0.78609	-0.015446	-0.52024	-0.514179	-0.596789	-0.475803	-0.0653299	-0.275549	-0.947057	-0.208554	-0.809094	-0.284062	-0.335807	-0.248691	-0.0487954	-0.419811	-0.244933	-0.0308138	-0.340668	-0.62593	-0.256293	0.569752	-0.26368	0.194094	-0.663527	-0.212106	0.0456406	-0.620028	-0.949573	0.359878	-0.847789	-0.0640281	-0.112245	-0.197764	-0.723553	-0.268127	0.359912	-0.109349	0.291546	-0.0290335	-0.251237	0.641352	0.208845	-0.231217	0.725327	0.316532
-4.9017	0.17536	-1.40683	-0.556533	-0.788377	-0.017485	-0.521703	-0.51578	-0.597027	-0.477784	-0.0670274	-0.276986	-0.948718	-0.208906	-0.808992	-0.285069	-0.337905	-0.250668	-0.0493334	-0.42031	-0.247231	-0.0315285	-0.341864	-0.626858	-0.257927	0.567294	-0.265321	0.194062	-0.664741	-0.212601	0.0445553	-0.620709	-0.947883	0.359842	-0.8485	-0.0637841	-0.112229	-0.195688	-0.72413	-0.267809	0.362603	-0.109253	0.292849	-0.0275695	-0.250626	0.640628	0.211052	-0.229942	0.72453	0.318132
-4.90071	0.174736	-1.40823	-0.558957	-0.790656	-0.0195294	-0.523168	-0.5174	-0.597261	-0.479778	-0.0687341	-0.278418	-0.95038	-0.209245	-0.808876	-0.286084	-0.339993	-0.25264	-0.0498729	-0.420809	-0.249535	-0.032243	-0.343063	-0.627785	-0.259565	0.564834	-0.266966	0.194028	-0.665946	-0.213093	0.0434687	-0.621387	-0.946203	0.359806	-0.849201	-0.06354	-0.112213	-0.193603	-0.724698	-0.267498	0.365293	-0.109164	0.29416	-0.0260942	-0.250022	0.63991	0.213259	-0.228659	0.723727	0.319745
-4.89973	0.174113	-1.40963	-0.561372	-0.792929	-0.021579	-0.524634	-0.519039	-0.597493	-0.481785	-0.0704498	-0.279847	-0.952041	-0.209571	-0.808747	-0.287107	-0.342071	-0.254607	-0.0504139	-0.421309	-0.251845	-0.0329573	-0.344263	-0.628712	-0.261206	0.562373	-0.268615	0.193995	-0.667143	-0.213581	0.0423809	-0.622062	-0.944532	0.359771	-0.849893	-0.0632959	-0.112196	-0.19151	-0.725255	-0.267195	0.367982	-0.109082	0.29548	-0.0246076	-0.249423	0.639196	0.215465	-0.227369	0.722916	0.321371
-4.89875	0.17349	-1.41101	-0.563778	-0.795195	-0.0236336	-0.526101	-0.520697	-0.597722	-0.483804	-0.0721743	-0.281272	-0.953702	-0.209885	-0.808603	-0.28814	-0.344139	-0.25657	-0.0509563	-0.421809	-0.25416	-0.0336714	-0.345464	-0.629637	-0.262849	0.559912	-0.270269	0.19396	-0.668332	-0.214066	0.0412919	-0.622733	-0.942872	0.359736	-0.850573	-0.0630517	-0.112179	-0.189409	-0.725803	-0.266899	0.370669	-0.109005	0.296807	-0.0231097	-0.24883	0.638487	0.21767	-0.22607	0.722099	0.32301
-4.89776	0.172867	-1.4124	-0.566174	-0.797454	-0.0256931	-0.527568	-0.522374	-0.597949	-0.485836	-0.0739074	-0.282693	-0.955363	-0.210185	-0.808445	-0.289181	-0.346195	-0.258528	-0.0515002	-0.42231	-0.25648	-0.0343851	-0.346666	-0.63056	-0.264496	0.55745	-0.271928	0.193926	-0.669512	-0.214546	0.0402018	-0.623402	-0.941223	0.359701	-0.851243	-0.0628074	-0.112161	-0.1873	-0.726341	-0.266611	0.373356	-0.108935	0.298141	-0.0216005	-0.248243	0.637782	0.219875	-0.224764	0.721275	0.324661
-4.89678	0.172246	-1.41377	-0.568562	-0.799706	-0.0277573	-0.529036	-0.52407	-0.598172	-0.48788	-0.0756489	-0.28411	-0.957023	-0.210473	-0.808273	-0.29023	-0.348241	-0.260482	-0.0520454	-0.42281	-0.258805	-0.0350985	-0.34787	-0.631482	-0.266145	0.554987	-0.27359	0.19389	-0.670683	-0.215024	0.0391108	-0.624066	-0.939583	0.359667	-0.851903	-0.0625629	-0.112142	-0.185183	-0.726868	-0.266331	0.376041	-0.108871	0.299483	-0.02008	-0.247662	0.637083	0.222078	-0.22345	0.720444	0.326324
-4.8958	0.171625	-1.41514	-0.57094	-0.80195	-0.0298261	-0.530505	-0.525784	-0.598393	-0.489937	-0.0773986	-0.285522	-0.958683	-0.210747	-0.808088	-0.291288	-0.350275	-0.26243	-0.052592	-0.423311	-0.261136	-0.0358116	-0.349075	-0.632403	-0.267796	0.552524	-0.275256	0.193854	-0.671846	-0.215497	0.0380188	-0.624728	-0.937955	0.359633	-0.852551	-0.0623182	-0.112123	-0.183059	-0.727386	-0.266058	0.378723	-0.108814	0.300832	-0.0185484	-0.247087	0.636388	0.224282	-0.222129	0.719607	0.328
-4.89481	0.171005	-1.4165	-0.573308	-0.804186	-0.0318992	-0.531973	-0.527516	-0.59861	-0.492006	-0.0791563	-0.286929	-0.960342	-0.211007	-0.807888	-0.292354	-0.352299	-0.264373	-0.0531399	-0.423812	-0.263471	-0.0365242	-0.35028	-0.633321	-0.26945	0.550062	-0.276926	0.193818	-0.673	-0.215967	0.036926	-0.625386	-0.936336	0.359599	-0.853189	-0.0620732	-0.112104	-0.180927	-0.727894	-0.265794	0.381403	-0.108763	0.302188	-0.0170056	-0.246517	0.635699	0.226484	-0.2208	0.718763	0.329689
-4.89383	0.170386	-1.41785	-0.575666	-0.806414	-0.0339765	-0.533442	-0.529265	-0.598824	-0.494086	-0.0809218	-0.288332	-0.962	-0.211255	-0.807675	-0.293429	-0.354311	-0.266311	-0.0536891	-0.424313	-0.26581	-0.0372364	-0.351486	-0.634238	-0.271106	0.547599	-0.2786	0.193781	-0.674144	-0.216434	0.0358325	-0.62604	-0.934729	0.359566	-0.853816	-0.061828	-0.112084	-0.178788	-0.728392	-0.265537	0.384081	-0.108719	0.303551	-0.0154518	-0.245954	0.635014	0.228685	-0.219464	0.717912	0.331389
-4.89285	0.169767	-1.4192	-0.578014	-0.808634	-0.0360578	-0.534911	-0.531033	-0.599035	-0.496178	-0.0826948	-0.28973	-0.963657	-0.211488	-0.807448	-0.294512	-0.356311	-0.268243	-0.0542395	-0.424814	-0.268154	-0.0379481	-0.352693	-0.635153	-0.272763	0.545137	-0.280277	0.193744	-0.67528	-0.216896	0.0347383	-0.62669	-0.933132	0.359533	-0.854431	-0.0615824	-0.112063	-0.176641	-0.728881	-0.265288	0.386755	-0.108682	0.304919	-0.0138868	-0.245396	0.634334	0.230885	-0.218121	0.717055	0.333102
-4.89187	0.16915	-1.42053	-0.580352	-0.810845	-0.038143	-0.536379	-0.532818	-0.599242	-0.498281	-0.0844753	-0.291122	-0.965313	-0.211708	-0.807207	-0.295604	-0.3583	-0.270169	-0.0547912	-0.425314	-0.270503	-0.0386593	-0.3539	-0.636065	-0.274423	0.542676	-0.281957	0.193707	-0.676407	-0.217355	0.0336435	-0.627337	-0.931547	0.359501	-0.855035	-0.0613364	-0.112042	-0.174487	-0.729359	-0.265048	0.389426	-0.108651	0.306294	-0.0123108	-0.244844	0.633659	0.233084	-0.21677	0.716191	0.334827
-4.89088	0.168534	-1.42186	-0.58268	-0.813048	-0.0402319	-0.537847	-0.53462	-0.599446	-0.500396	-0.0862629	-0.292509	-0.966968	-0.211915	-0.806953	-0.296704	-0.360277	-0.27209	-0.055344	-0.425815	-0.272855	-0.0393698	-0.355108	-0.636976	-0.276084	0.540217	-0.28364	0.193669	-0.677525	-0.217811	0.0325483	-0.62798	-0.929972	0.359469	-0.855628	-0.06109	-0.11202	-0.172326	-0.729828	-0.264815	0.392094	-0.108627	0.307675	-0.0107239	-0.244297	0.632989	0.235282	-0.215412	0.715321	0.336563
-4.8899	0.167918	-1.42318	-0.584997	-0.815242	-0.0423242	-0.539315	-0.53644	-0.599646	-0.502522	-0.0880575	-0.293891	-0.968621	-0.212107	-0.806684	-0.297812	-0.362242	-0.274004	-0.0558979	-0.426314	-0.275211	-0.0400798	-0.356315	-0.637884	-0.277747	0.537758	-0.285327	0.193631	-0.678633	-0.218262	0.0314526	-0.628619	-0.928409	0.359437	-0.856209	-0.0608432	-0.111997	-0.170159	-0.730287	-0.26459	0.394758	-0.10861	0.309061	-0.00912596	-0.243756	0.632323	0.237478	-0.214047	0.714444	0.338311
-4.88892	0.167304	-1.4245	-0.587303	-0.817427	-0.0444199	-0.540781	-0.538276	-0.599842	-0.504658	-0.0898588	-0.295267	-0.970272	-0.212285	-0.806403	-0.298929	-0.364195	-0.275913	-0.0564529	-0.426813	-0.277571	-0.0407891	-0.357523	-0.638789	-0.27941	0.535301	-0.287016	0.193593	-0.679732	-0.21871	0.0303566	-0.629254	-0.926857	0.359406	-0.856779	-0.0605958	-0.111974	-0.167984	-0.730736	-0.264374	0.397417	-0.108599	0.310453	-0.00751717	-0.243222	0.631663	0.239673	-0.212675	0.713561	0.340071
-4.88793	0.16669	-1.4258	-0.589598	-0.819602	-0.0465187	-0.542247	-0.540129	-0.600035	-0.506806	-0.0916668	-0.296637	-0.971922	-0.21245	-0.806107	-0.300053	-0.366136	-0.277815	-0.057009	-0.427312	-0.279935	-0.0414977	-0.358731	-0.639692	-0.281075	0.532845	-0.288708	0.193555	-0.680822	-0.219154	0.0292604	-0.629885	-0.925316	0.359376	-0.857337	-0.0603479	-0.11195	-0.165803	-0.731176	-0.264166	0.400072	-0.108596	0.31185	-0.00589753	-0.242692	0.631007	0.241867	-0.211296	0.712672	0.341842
-4.88695	0.166078	-1.4271	-0.591882	-0.821768	-0.0486205	-0.543712	-0.541998	-0.600224	-0.508963	-0.093481	-0.298002	-0.97357	-0.2126	-0.805798	-0.301186	-0.368064	-0.27971	-0.0575661	-0.427809	-0.282302	-0.0422056	-0.359938	-0.640592	-0.282741	0.530392	-0.290402	0.193517	-0.681902	-0.219594	0.028164	-0.630512	-0.923787	0.359346	-0.857883	-0.0600994	-0.111925	-0.163615	-0.731606	-0.263966	0.402722	-0.108599	0.313252	-0.00426711	-0.242169	0.630356	0.244059	-0.209911	0.711777	0.343625
-4.88597	0.165467	-1.42838	-0.594155	-0.823925	-0.0507251	-0.545176	-0.543883	-0.600408	-0.511131	-0.0953014	-0.29936	-0.975216	-0.212736	-0.805476	-0.302327	-0.36998	-0.281599	-0.0581241	-0.428306	-0.284671	-0.0429127	-0.361145	-0.641489	-0.284408	0.527941	-0.292099	0.193479	-0.682972	-0.220031	0.0270675	-0.631135	-0.92227	0.359316	-0.858416	-0.0598503	-0.1119	-0.161421	-0.732027	-0.263775	0.405367	-0.10861	0.314658	-0.00262594	-0.241651	0.62971	0.24625	-0.208519	0.710875	0.345419
-4.88498	0.164857	-1.42966	-0.596416	-0.826071	-0.0528324	-0.546638	-0.545784	-0.600589	-0.513309	-0.0971277	-0.300711	-0.97686	-0.212858	-0.80514	-0.303476	-0.371883	-0.283482	-0.0586831	-0.428802	-0.287044	-0.043619	-0.362352	-0.642383	-0.286075	0.525492	-0.293798	0.19344	-0.684033	-0.220464	0.025971	-0.631754	-0.920764	0.359287	-0.858938	-0.0596006	-0.111873	-0.159221	-0.732438	-0.263592	0.408007	-0.108628	0.316068	-0.000974076	-0.241139	0.629068	0.248439	-0.20712	0.709967	0.347224
-4.884	0.164249	-1.43093	-0.598665	-0.828208	-0.054942	-0.548099	-0.5477	-0.600765	-0.515497	-0.0989598	-0.302056	-0.978501	-0.212965	-0.804791	-0.304634	-0.373773	-0.285357	-0.0592429	-0.429297	-0.28942	-0.0443244	-0.363557	-0.643274	-0.287742	0.523046	-0.295499	0.193402	-0.685084	-0.220893	0.0248746	-0.632368	-0.91927	0.359259	-0.859448	-0.0593501	-0.111847	-0.157015	-0.732839	-0.263417	0.410641	-0.108653	0.317483	0.000688422	-0.240632	0.628432	0.250626	-0.205714	0.709053	0.34904
-4.88302	0.163641	-1.43219	-0.600903	-0.830334	-0.057054	-0.549558	-0.549632	-0.600937	-0.517695	-0.100797	-0.303395	-0.980141	-0.213058	-0.804428	-0.305799	-0.37565	-0.287225	-0.0598036	-0.42979	-0.291798	-0.0450289	-0.364763	-0.644162	-0.28941	0.520603	-0.297202	0.193364	-0.686126	-0.221318	0.0237784	-0.632977	-0.917787	0.359231	-0.859945	-0.0590989	-0.111819	-0.154802	-0.733231	-0.263251	0.413268	-0.108685	0.318902	0.0023615	-0.240132	0.6278	0.252812	-0.204302	0.708133	0.350867
-4.88204	0.163035	-1.43344	-0.603128	-0.83245	-0.059168	-0.551016	-0.55158	-0.601105	-0.519902	-0.10264	-0.304726	-0.981777	-0.213136	-0.804052	-0.306972	-0.377514	-0.289086	-0.0603651	-0.430282	-0.294179	-0.0457325	-0.365967	-0.645046	-0.291077	0.518164	-0.298907	0.193326	-0.687157	-0.22174	0.0226824	-0.633582	-0.916317	0.359204	-0.86043	-0.0588469	-0.11179	-0.152584	-0.733614	-0.263094	0.41589	-0.108724	0.320324	0.00404511	-0.239637	0.627173	0.254996	-0.202884	0.707207	0.352705
-4.88105	0.16243	-1.43468	-0.605342	-0.834555	-0.0612839	-0.552471	-0.553542	-0.601269	-0.522118	-0.104488	-0.306051	-0.983411	-0.2132	-0.803663	-0.308153	-0.379364	-0.29094	-0.0609273	-0.430773	-0.296562	-0.0464351	-0.36717	-0.645927	-0.292745	0.515727	-0.300613	0.193288	-0.688179	-0.222157	0.0215868	-0.634183	-0.914858	0.359177	-0.860902	-0.0585941	-0.111761	-0.15036	-0.733987	-0.262945	0.418504	-0.108771	0.32175	0.00573919	-0.239147	0.62655	0.257177	-0.20146	0.706275	0.354554
-4.88007	0.161827	-1.43591	-0.607543	-0.83665	-0.0634016	-0.553924	-0.555519	-0.601427	-0.524343	-0.106341	-0.307368	-0.985042	-0.213249	-0.803261	-0.309342	-0.381202	-0.292786	-0.0614903	-0.431262	-0.298947	-0.0471367	-0.368372	-0.646804	-0.294412	0.513295	-0.30232	0.19325	-0.68919	-0.222571	0.0204915	-0.634779	-0.913412	0.359151	-0.861361	-0.0583405	-0.111731	-0.14813	-0.734351	-0.262805	0.421112	-0.108825	0.323179	0.00744368	-0.238663	0.625933	0.259357	-0.20003	0.705336	0.356413
-4.87909	0.161224	-1.43714	-0.609731	-0.838733	-0.0655207	-0.555374	-0.55751	-0.601581	-0.526577	-0.108199	-0.308678	-0.986671	-0.213283	-0.802846	-0.310538	-0.383026	-0.294624	-0.0620539	-0.43175	-0.301333	-0.0478373	-0.369573	-0.647677	-0.296078	0.510866	-0.304029	0.193213	-0.690192	-0.222981	0.0193968	-0.63537	-0.911978	0.359125	-0.861808	-0.0580859	-0.1117	-0.145895	-0.734706	-0.262673	0.423713	-0.108887	0.32461	0.00915852	-0.238185	0.62532	0.261535	-0.198593	0.704392	0.358282
-4.8781	0.160624	-1.43835	-0.611907	-0.840805	-0.0676413	-0.556822	-0.559515	-0.601731	-0.52882	-0.110061	-0.30998	-0.988296	-0.213302	-0.802418	-0.311742	-0.384836	-0.296455	-0.0626182	-0.432236	-0.303722	-0.0485367	-0.370772	-0.648546	-0.297744	0.508441	-0.305739	0.193176	-0.691183	-0.223387	0.0183026	-0.635956	-0.910556	0.3591	-0.862242	-0.0578305	-0.111669	-0.143655	-0.735051	-0.26255	0.426306	-0.108955	0.326045	0.0108837	-0.237712	0.624711	0.26371	-0.197151	0.703442	0.360161
-4.87712	0.160024	-1.43955	-0.61407	-0.842866	-0.069763	-0.558268	-0.561534	-0.601875	-0.531071	-0.111927	-0.311275	-0.989918	-0.213307	-0.801976	-0.312954	-0.386632	-0.298277	-0.063183	-0.43272	-0.306112	-0.049235	-0.37197	-0.649411	-0.299409	0.506021	-0.30745	0.193139	-0.692164	-0.223789	0.0172091	-0.636538	-0.909147	0.359076	-0.862663	-0.057574	-0.111636	-0.141409	-0.735387	-0.262436	0.428891	-0.109032	0.327482	0.012619	-0.237245	0.624108	0.265884	-0.195702	0.702486	0.362051
-4.87614	0.159426	-1.44074	-0.616219	-0.844915	-0.0718858	-0.55971	-0.563567	-0.602015	-0.53333	-0.113797	-0.312562	-0.991536	-0.213296	-0.801522	-0.314174	-0.388414	-0.300092	-0.0637483	-0.433202	-0.308503	-0.0499321	-0.373166	-0.650272	-0.301073	0.503605	-0.309161	0.193103	-0.693134	-0.224187	0.0161163	-0.637114	-0.90775	0.359052	-0.86307	-0.0573166	-0.111603	-0.139159	-0.735715	-0.262331	0.431468	-0.109116	0.328921	0.0143645	-0.236783	0.623508	0.268055	-0.194249	0.701525	0.36395
-4.87515	0.15883	-1.44193	-0.618356	-0.846952	-0.0740093	-0.56115	-0.565614	-0.60215	-0.535597	-0.115671	-0.313841	-0.993151	-0.213271	-0.801055	-0.315401	-0.390183	-0.301898	-0.0643142	-0.433682	-0.310895	-0.050628	-0.37436	-0.651129	-0.302736	0.501195	-0.310873	0.193068	-0.694094	-0.224582	0.0150243	-0.637685	-0.906366	0.359029	-0.863465	-0.0570581	-0.111569	-0.136903	-0.736033	-0.262234	0.434037	-0.109207	0.330361	0.0161202	-0.236327	0.622914	0.270223	-0.192789	0.700557	0.36586
-4.87417	0.158235	-1.4431	-0.620479	-0.848978	-0.0761335	-0.562586	-0.567673	-0.602279	-0.537872	-0.117549	-0.315111	-0.994763	-0.21323	-0.800576	-0.316636	-0.391937	-0.303696	-0.0648805	-0.434159	-0.313288	-0.0513227	-0.375552	-0.651981	-0.304397	0.498789	-0.312586	0.193032	-0.695044	-0.224972	0.0139333	-0.638251	-0.904994	0.359006	-0.863846	-0.0567986	-0.111534	-0.134643	-0.736342	-0.262146	0.436597	-0.109306	0.331804	0.0178858	-0.235877	0.622324	0.272389	-0.191324	0.699584	0.367778
-4.87319	0.157641	-1.44426	-0.622589	-0.850991	-0.0782582	-0.564018	-0.569746	-0.602404	-0.540154	-0.11943	-0.316373	-0.996371	-0.213174	-0.800084	-0.317878	-0.393677	-0.305485	-0.0654471	-0.434635	-0.315682	-0.0520161	-0.376742	-0.652829	-0.306057	0.496389	-0.314299	0.192998	-0.695983	-0.225359	0.0128432	-0.638812	-0.903634	0.358984	-0.864214	-0.056538	-0.111498	-0.132378	-0.736642	-0.262067	0.439148	-0.109413	0.333248	0.0196615	-0.235432	0.621739	0.274553	-0.189854	0.698605	0.369707
-4.8722	0.157049	-1.44541	-0.624685	-0.852992	-0.0803831	-0.565448	-0.571831	-0.602523	-0.542444	-0.121315	-0.317627	-0.997974	-0.213103	-0.799579	-0.319128	-0.395403	-0.307266	-0.0660142	-0.435108	-0.318076	-0.0527081	-0.37793	-0.653672	-0.307715	0.493994	-0.316012	0.192964	-0.696912	-0.225742	0.0117541	-0.639367	-0.902288	0.358963	-0.864568	-0.0562762	-0.111461	-0.130108	-0.736933	-0.261997	0.441689	-0.109528	0.334693	0.021447	-0.234992	0.621158	0.276714	-0.188378	0.697621	0.371645
-4.87122	0.156458	-1.44655	-0.626767	-0.85498	-0.0825082	-0.566873	-0.573929	-0.602637	-0.54474	-0.123202	-0.318872	-0.999574	-0.213017	-0.799061	-0.320384	-0.397114	-0.309037	-0.0665815	-0.435578	-0.320471	-0.0533988	-0.379116	-0.65451	-0.309371	0.491605	-0.317725	0.192931	-0.697829	-0.22612	0.0106662	-0.639917	-0.900954	0.358942	-0.864909	-0.0560132	-0.111424	-0.127835	-0.737215	-0.261936	0.444221	-0.10965	0.336139	0.0232424	-0.234558	0.620581	0.278873	-0.186898	0.696631	0.373592
-4.87024	0.155869	-1.44768	-0.628835	-0.856956	-0.0846331	-0.568294	-0.576038	-0.602745	-0.547044	-0.125093	-0.320108	-1.00117	-0.212915	-0.798532	-0.321648	-0.39881	-0.3108	-0.067149	-0.436046	-0.322866	-0.054088	-0.380299	-0.655343	-0.311025	0.489222	-0.319438	0.192898	-0.698736	-0.226495	0.00957956	-0.640461	-0.899634	0.358922	-0.865236	-0.055749	-0.111385	-0.125557	-0.737489	-0.261883	0.446743	-0.10978	0.337586	0.0250475	-0.234129	0.620009	0.281028	-0.185412	0.695635	0.375548
-4.86926	0.155282	-1.4488	-0.630889	-0.858919	-0.0867577	-0.569711	-0.57816	-0.602849	-0.549354	-0.126985	-0.321335	-1.00276	-0.212798	-0.79799	-0.322919	-0.400492	-0.312554	-0.0677168	-0.436512	-0.325261	-0.0547758	-0.381479	-0.656172	-0.312677	0.486845	-0.321151	0.192867	-0.699632	-0.226866	0.00849418	-0.641	-0.898326	0.358902	-0.865549	-0.0554836	-0.111346	-0.123274	-0.737754	-0.26184	0.449255	-0.109918	0.339034	0.0268623	-0.233706	0.619441	0.283181	-0.183922	0.694634	0.377512
-4.86827	0.154696	-1.44991	-0.632929	-0.860869	-0.088882	-0.571124	-0.580293	-0.602946	-0.55167	-0.128881	-0.322553	-1.00435	-0.212665	-0.797435	-0.324198	-0.402158	-0.314299	-0.0682847	-0.436974	-0.327655	-0.0554621	-0.382657	-0.656995	-0.314326	0.484475	-0.322863	0.192836	-0.700518	-0.227233	0.00741016	-0.641533	-0.897031	0.358884	-0.865849	-0.0552169	-0.111306	-0.120988	-0.73801	-0.261805	0.451756	-0.110064	0.340481	0.0286868	-0.233288	0.618878	0.285331	-0.182426	0.693627	0.379486
-4.86729	0.154112	-1.45101	-0.634955	-0.862806	-0.0910055	-0.572532	-0.582438	-0.603038	-0.553993	-0.130778	-0.323761	-1.00593	-0.212517	-0.796869	-0.325483	-0.40381	-0.316034	-0.0688527	-0.437434	-0.330049	-0.0561469	-0.383832	-0.657812	-0.315973	0.482111	-0.324574	0.192806	-0.701392	-0.227595	0.0063276	-0.64206	-0.895749	0.358865	-0.866134	-0.0549489	-0.111265	-0.118698	-0.738257	-0.26178	0.454247	-0.110218	0.341929	0.0305207	-0.232875	0.618319	0.287478	-0.180927	0.692615	0.381468
-4.86631	0.153529	-1.45209	-0.636965	-0.864729	-0.0931283	-0.573936	-0.584594	-0.603124	-0.556322	-0.132678	-0.32496	-1.00751	-0.212354	-0.79629	-0.326775	-0.405447	-0.317759	-0.0694208	-0.43789	-0.332443	-0.0568301	-0.385003	-0.658624	-0.317616	0.479755	-0.326285	0.192777	-0.702255	-0.227954	0.00524656	-0.642582	-0.894481	0.358848	-0.866406	-0.0546796	-0.111223	-0.116404	-0.738496	-0.261763	0.456727	-0.110379	0.343377	0.0323642	-0.232468	0.617765	0.289622	-0.179422	0.691598	0.383459
-4.86532	0.152948	-1.45317	-0.638961	-0.866639	-0.09525	-0.575334	-0.58676	-0.603205	-0.558656	-0.134579	-0.32615	-1.00908	-0.212175	-0.795699	-0.328075	-0.407068	-0.319476	-0.0699889	-0.438343	-0.334836	-0.0575118	-0.386172	-0.659431	-0.319257	0.477405	-0.327994	0.192749	-0.703107	-0.228309	0.00416713	-0.643097	-0.893225	0.358831	-0.866663	-0.0544088	-0.11118	-0.114107	-0.738727	-0.261755	0.459195	-0.110549	0.344823	0.034217	-0.232066	0.617214	0.291763	-0.177913	0.690575	0.385458
-4.86434	0.152369	-1.45423	-0.640943	-0.868535	-0.0973706	-0.576728	-0.588937	-0.603279	-0.560996	-0.136482	-0.327329	-1.01065	-0.21198	-0.795097	-0.329381	-0.408675	-0.321182	-0.0705569	-0.438793	-0.337227	-0.0581918	-0.387338	-0.660232	-0.320894	0.475063	-0.329703	0.192723	-0.703948	-0.22866	0.00308938	-0.643606	-0.891983	0.358814	-0.866906	-0.0541367	-0.111136	-0.111807	-0.738949	-0.261757	0.461651	-0.110727	0.34627	0.0360792	-0.23167	0.616668	0.293901	-0.1764	0.689547	0.387465
-4.86336	0.151791	-1.45529	-0.642909	-0.870418	-0.0994897	-0.578116	-0.591125	-0.603348	-0.56334	-0.138386	-0.328499	-1.01221	-0.21177	-0.794483	-0.330693	-0.410265	-0.322878	-0.0711248	-0.43924	-0.339618	-0.0588701	-0.3885	-0.661027	-0.322529	0.472728	-0.33141	0.192697	-0.704777	-0.229006	0.00201339	-0.644109	-0.890754	0.358798	-0.867134	-0.0538632	-0.111092	-0.109503	-0.739163	-0.261767	0.464096	-0.110912	0.347715	0.0379506	-0.231278	0.616126	0.296035	-0.174883	0.688513	0.38948
-4.86237	0.151215	-1.45633	-0.64486	-0.872286	-0.101607	-0.579499	-0.593323	-0.603411	-0.56569	-0.140291	-0.329659	-1.01377	-0.211544	-0.793857	-0.332013	-0.411841	-0.324565	-0.0716926	-0.439683	-0.342007	-0.0595467	-0.389658	-0.661816	-0.324159	0.470402	-0.333116	0.192673	-0.705595	-0.229349	0.000939237	-0.644606	-0.889538	0.358783	-0.867349	-0.0535882	-0.111046	-0.107195	-0.739368	-0.261786	0.466529	-0.111106	0.349159	0.0398311	-0.230892	0.615588	0.298167	-0.173362	0.687474	0.391503
-4.86139	0.15064	-1.45736	-0.646795	-0.87414	-0.103723	-0.580876	-0.59553	-0.603467	-0.568045	-0.142197	-0.330808	-1.01532	-0.211302	-0.793219	-0.333339	-0.4134	-0.326241	-0.0722601	-0.440122	-0.344395	-0.0602215	-0.390813	-0.662599	-0.325786	0.468083	-0.334821	0.19265	-0.706402	-0.229688	-0.000133009	-0.645096	-0.888336	0.358768	-0.867548	-0.0533117	-0.111	-0.104885	-0.739565	-0.261814	0.468949	-0.111308	0.350602	0.0417207	-0.230512	0.615055	0.300295	-0.171837	0.68643	0.393533
-4.86041	0.150068	-1.45837	-0.648716	-0.87598	-0.105837	-0.582247	-0.597747	-0.603518	-0.570404	-0.144104	-0.331947	-1.01687	-0.211045	-0.79257	-0.334671	-0.414944	-0.327907	-0.0728274	-0.440558	-0.346781	-0.0608946	-0.391964	-0.663376	-0.327409	0.465773	-0.336523	0.192628	-0.707198	-0.230022	-0.00120327	-0.64558	-0.887148	0.358754	-0.867734	-0.0530336	-0.110952	-0.102572	-0.739754	-0.261851	0.471356	-0.111518	0.352043	0.0436194	-0.230136	0.614525	0.302419	-0.170308	0.685381	0.395571
-4.85943	0.149496	-1.45938	-0.65062	-0.877806	-0.107949	-0.583613	-0.599973	-0.603562	-0.572768	-0.146012	-0.333075	-1.01841	-0.210772	-0.79191	-0.33601	-0.416473	-0.329563	-0.0733944	-0.44099	-0.349165	-0.0615658	-0.393111	-0.664147	-0.329028	0.463471	-0.338224	0.192607	-0.707981	-0.230352	-0.00227147	-0.646057	-0.885973	0.358741	-0.867904	-0.0527541	-0.110904	-0.100257	-0.739936	-0.261897	0.47375	-0.111736	0.353483	0.0455269	-0.229766	0.613999	0.30454	-0.168776	0.684327	0.397616
-4.85844	0.148927	-1.46037	-0.652509	-0.879617	-0.110059	-0.584972	-0.602208	-0.6036	-0.575135	-0.14792	-0.334192	-1.01995	-0.210483	-0.791238	-0.337356	-0.417985	-0.331208	-0.0739611	-0.441418	-0.351547	-0.0622352	-0.394255	-0.664911	-0.330642	0.461178	-0.339923	0.192588	-0.708754	-0.230679	-0.00333754	-0.646527	-0.884811	0.358728	-0.86806	-0.0524729	-0.110855	-0.0979384	-0.740109	-0.261952	0.476131	-0.111962	0.35492	0.0474432	-0.229401	0.613478	0.306657	-0.16724	0.683267	0.399668
-4.85746	0.148359	-1.46135	-0.654382	-0.881413	-0.112166	-0.586324	-0.604452	-0.603632	-0.577507	-0.149828	-0.335299	-1.02147	-0.210179	-0.790555	-0.338707	-0.419481	-0.332843	-0.0745273	-0.441842	-0.353926	-0.0629027	-0.395394	-0.665669	-0.332253	0.458894	-0.341619	0.192571	-0.709514	-0.231001	-0.00440141	-0.646991	-0.883663	0.358715	-0.868201	-0.0521902	-0.110805	-0.0956177	-0.740274	-0.262016	0.478499	-0.112196	0.356355	0.0493683	-0.229041	0.61296	0.308771	-0.165701	0.682203	0.401727
-4.85648	0.147793	-1.46232	-0.656239	-0.883194	-0.11427	-0.58767	-0.606705	-0.603657	-0.579882	-0.151736	-0.336395	-1.023	-0.209858	-0.789861	-0.340065	-0.420962	-0.334467	-0.075093	-0.442262	-0.356303	-0.0635682	-0.396529	-0.66642	-0.333858	0.456619	-0.343313	0.192555	-0.710263	-0.231319	-0.00546299	-0.647448	-0.882529	0.358704	-0.868328	-0.0519058	-0.110754	-0.0932946	-0.740431	-0.262089	0.480852	-0.112439	0.357787	0.0513021	-0.228686	0.612446	0.310881	-0.164159	0.681133	0.403793
-4.85549	0.147229	-1.46328	-0.65808	-0.88496	-0.116372	-0.58901	-0.608965	-0.603676	-0.58226	-0.153644	-0.337479	-1.02452	-0.209522	-0.789156	-0.341429	-0.422426	-0.33608	-0.0756583	-0.442677	-0.358678	-0.0642318	-0.397659	-0.667164	-0.335459	0.454353	-0.345005	0.19254	-0.711	-0.231633	-0.00652222	-0.647898	-0.881408	0.358692	-0.868439	-0.0516197	-0.110702	-0.0909694	-0.740581	-0.262171	0.483192	-0.11269	0.359217	0.0532444	-0.228336	0.611936	0.312987	-0.162614	0.680059	0.405865
-4.85451	0.146666	-1.46422	-0.659905	-0.886711	-0.118471	-0.590342	-0.611234	-0.603689	-0.584642	-0.155551	-0.338553	-1.02603	-0.20917	-0.78844	-0.342799	-0.423874	-0.337682	-0.0762229	-0.443089	-0.361049	-0.0648933	-0.398785	-0.667901	-0.337055	0.452097	-0.346694	0.192528	-0.711725	-0.231942	-0.00757904	-0.648341	-0.880301	0.358681	-0.868535	-0.051332	-0.11065	-0.0886421	-0.740723	-0.262262	0.485517	-0.112949	0.360643	0.0551952	-0.227991	0.61143	0.315089	-0.161066	0.678979	0.407944
-4.85353	0.146105	-1.46516	-0.661714	-0.888446	-0.120566	-0.591667	-0.61351	-0.603695	-0.587026	-0.157458	-0.339614	-1.02753	-0.208802	-0.787713	-0.344175	-0.425305	-0.339273	-0.076787	-0.443495	-0.363418	-0.0655529	-0.399907	-0.668631	-0.338646	0.44985	-0.348381	0.192517	-0.712439	-0.232248	-0.00863336	-0.648776	-0.879208	0.358671	-0.868616	-0.0510426	-0.110596	-0.086313	-0.740857	-0.262362	0.487827	-0.113217	0.362067	0.0571544	-0.227652	0.610928	0.317187	-0.159515	0.677895	0.410029
-4.85254	0.145545	-1.46608	-0.663506	-0.890166	-0.122658	-0.592985	-0.615794	-0.603694	-0.589413	-0.159364	-0.340665	-1.02903	-0.208419	-0.786975	-0.345556	-0.426721	-0.340853	-0.0773503	-0.443898	-0.365783	-0.0662103	-0.401023	-0.669355	-0.340231	0.447614	-0.350064	0.192508	-0.71314	-0.232549	-0.00968511	-0.649204	-0.878128	0.358661	-0.868683	-0.0507514	-0.110542	-0.0839821	-0.740984	-0.26247	0.490123	-0.113492	0.363487	0.059122	-0.227317	0.610429	0.319281	-0.157962	0.676806	0.41212
-4.85156	0.144988	-1.46698	-0.665281	-0.891871	-0.124747	-0.594295	-0.618084	-0.603686	-0.591802	-0.161269	-0.341703	-1.03052	-0.208019	-0.786228	-0.346944	-0.428119	-0.342421	-0.077913	-0.444295	-0.368145	-0.0668657	-0.402135	-0.670071	-0.341811	0.445388	-0.351744	0.1925	-0.713829	-0.232846	-0.0107342	-0.649625	-0.877063	0.358652	-0.868733	-0.0504585	-0.110486	-0.0816495	-0.741104	-0.262588	0.492403	-0.113776	0.364903	0.0610977	-0.226988	0.609934	0.321371	-0.156406	0.675711	0.414217
-4.85058	0.144432	-1.46788	-0.66704	-0.893559	-0.126832	-0.595597	-0.620382	-0.603672	-0.594194	-0.163173	-0.34273	-1.03201	-0.207604	-0.785469	-0.348337	-0.429502	-0.343978	-0.0784748	-0.444688	-0.370503	-0.0675189	-0.403242	-0.670779	-0.343385	0.443172	-0.353422	0.192495	-0.714507	-0.233139	-0.0117807	-0.650039	-0.876011	0.358643	-0.868769	-0.0501639	-0.11043	-0.0793155	-0.741216	-0.262714	0.494668	-0.114069	0.366315	0.0630815	-0.226663	0.609442	0.323457	-0.154848	0.674612	0.41632
-4.84959	0.143877	-1.46876	-0.668782	-0.895232	-0.128913	-0.596891	-0.622686	-0.603651	-0.596587	-0.165075	-0.343744	-1.03349	-0.207173	-0.784701	-0.349736	-0.430867	-0.345524	-0.0790358	-0.445076	-0.372857	-0.0681699	-0.404344	-0.671481	-0.344954	0.440967	-0.355095	0.192492	-0.715172	-0.233428	-0.0128243	-0.650445	-0.874973	0.358635	-0.868789	-0.0498674	-0.110373	-0.0769802	-0.741321	-0.262849	0.496918	-0.11437	0.367724	0.0650734	-0.226344	0.608954	0.325539	-0.153287	0.673508	0.418428
-4.84861	0.143324	-1.46963	-0.670507	-0.896889	-0.13099	-0.598177	-0.624997	-0.603624	-0.598982	-0.166976	-0.344747	-1.03496	-0.206726	-0.783922	-0.35114	-0.432216	-0.347058	-0.0795959	-0.445459	-0.375208	-0.0688187	-0.40544	-0.672174	-0.346516	0.438773	-0.356766	0.19249	-0.715825	-0.233712	-0.0138651	-0.650843	-0.873949	0.358627	-0.868794	-0.0495691	-0.110315	-0.0746436	-0.741418	-0.262993	0.499151	-0.114679	0.369128	0.0670732	-0.226029	0.60847	0.327616	-0.151725	0.6724	0.420542
-4.84763	0.142773	-1.47049	-0.672215	-0.898529	-0.133062	-0.599455	-0.627313	-0.603589	-0.601378	-0.168875	-0.345737	-1.03642	-0.206263	-0.783133	-0.35255	-0.433548	-0.34858	-0.080155	-0.445837	-0.377554	-0.0694653	-0.406532	-0.67286	-0.348073	0.43659	-0.358432	0.192491	-0.716466	-0.233992	-0.014903	-0.651233	-0.872939	0.35862	-0.868784	-0.0492689	-0.110257	-0.0723059	-0.741509	-0.263145	0.501368	-0.114996	0.370528	0.0690809	-0.225719	0.607989	0.32969	-0.150161	0.671286	0.422661
-4.84665	0.142224	-1.47133	-0.673906	-0.900154	-0.13513	-0.600725	-0.629636	-0.603548	-0.603776	-0.170772	-0.346715	-1.03788	-0.205785	-0.782334	-0.353965	-0.434864	-0.350091	-0.0807131	-0.44621	-0.379896	-0.0701096	-0.407618	-0.673538	-0.349623	0.434417	-0.360095	0.192494	-0.717094	-0.234268	-0.015938	-0.651616	-0.871943	0.358612	-0.868758	-0.0489669	-0.110197	-0.0699674	-0.741592	-0.263306	0.503569	-0.115322	0.371922	0.0710963	-0.225415	0.607511	0.331758	-0.148595	0.670168	0.424784
-4.84566	0.141676	-1.47216	-0.675579	-0.901762	-0.137194	-0.601985	-0.631964	-0.603499	-0.606174	-0.172667	-0.347681	-1.03933	-0.20529	-0.781525	-0.355385	-0.436162	-0.35159	-0.0812702	-0.446577	-0.382233	-0.0707515	-0.408698	-0.674209	-0.351166	0.432257	-0.361754	0.192499	-0.71771	-0.23454	-0.0169699	-0.651991	-0.87096	0.358606	-0.868716	-0.048663	-0.110137	-0.067628	-0.741669	-0.263476	0.505753	-0.115656	0.373312	0.0731193	-0.225115	0.607037	0.333822	-0.147028	0.669046	0.426913
-4.84468	0.14113	-1.47298	-0.677236	-0.903353	-0.139253	-0.603237	-0.634297	-0.603444	-0.608574	-0.17456	-0.348634	-1.04077	-0.20478	-0.780707	-0.35681	-0.437444	-0.353076	-0.0818261	-0.446939	-0.384565	-0.0713912	-0.409773	-0.674871	-0.352703	0.430108	-0.363409	0.192507	-0.718314	-0.234807	-0.0179987	-0.652357	-0.869992	0.358599	-0.868659	-0.0483573	-0.110076	-0.065288	-0.741739	-0.263655	0.507921	-0.115999	0.374697	0.0751499	-0.22482	0.606565	0.335882	-0.145459	0.667918	0.429046
-4.8437	0.140585	-1.47378	-0.678874	-0.904928	-0.141306	-0.604479	-0.636635	-0.603381	-0.610973	-0.17645	-0.349574	-1.04221	-0.204254	-0.779879	-0.35824	-0.438709	-0.354551	-0.0823808	-0.447296	-0.386893	-0.0720284	-0.410842	-0.675525	-0.354233	0.427971	-0.36506	0.192516	-0.718905	-0.23507	-0.0190243	-0.652715	-0.869038	0.358593	-0.868586	-0.0480496	-0.110014	-0.0629475	-0.741802	-0.263842	0.510071	-0.11635	0.376077	0.077188	-0.224529	0.606097	0.337937	-0.143889	0.666786	0.431183
-4.84271	0.140042	-1.47457	-0.680496	-0.906486	-0.143355	-0.605712	-0.638978	-0.603312	-0.613373	-0.178337	-0.350501	-1.04363	-0.203713	-0.779041	-0.359676	-0.439956	-0.356013	-0.0829344	-0.447647	-0.389216	-0.0726633	-0.411905	-0.676171	-0.355756	0.425845	-0.366706	0.192529	-0.719484	-0.235329	-0.0200467	-0.653065	-0.868098	0.358588	-0.868498	-0.0477399	-0.109951	-0.0606065	-0.741858	-0.264038	0.512203	-0.116709	0.37745	0.0792334	-0.224244	0.605633	0.339987	-0.142318	0.66565	0.433325
-4.84173	0.139501	-1.47535	-0.682099	-0.908027	-0.145399	-0.606936	-0.641325	-0.603235	-0.615773	-0.180221	-0.351415	-1.04505	-0.203155	-0.778195	-0.361116	-0.441187	-0.357463	-0.0834866	-0.447992	-0.391533	-0.0732957	-0.412963	-0.676809	-0.357272	0.423732	-0.368348	0.192543	-0.72005	-0.235583	-0.0210659	-0.653407	-0.867172	0.358582	-0.868393	-0.0474283	-0.109887	-0.0582654	-0.741908	-0.264242	0.514318	-0.117077	0.378819	0.081286	-0.223964	0.605171	0.342032	-0.140746	0.664508	0.435471
-4.84075	0.138961	-1.47611	-0.683685	-0.909551	-0.147436	-0.60815	-0.643676	-0.603151	-0.618173	-0.182103	-0.352316	-1.04647	-0.202582	-0.777339	-0.362561	-0.4424	-0.3589	-0.0840375	-0.448332	-0.393845	-0.0739256	-0.414014	-0.677439	-0.358781	0.421632	-0.369985	0.192561	-0.720604	-0.235833	-0.0220816	-0.65374	-0.86626	0.358577	-0.868273	-0.0471148	-0.109823	-0.0559241	-0.741952	-0.264455	0.516415	-0.117453	0.380181	0.0833459	-0.223688	0.604712	0.344073	-0.139174	0.663363	0.43762
-4.83976	0.138423	-1.47686	-0.685253	-0.911058	-0.149469	-0.609353	-0.646031	-0.60306	-0.620572	-0.183981	-0.353204	-1.04787	-0.201994	-0.776474	-0.36401	-0.443596	-0.360325	-0.0845869	-0.448666	-0.396151	-0.074553	-0.415059	-0.67806	-0.360282	0.419544	-0.371617	0.192581	-0.721145	-0.236079	-0.023094	-0.654064	-0.865361	0.358573	-0.868137	-0.0467992	-0.109758	-0.0535828	-0.741989	-0.264676	0.518494	-0.117838	0.381537	0.0854127	-0.223417	0.604256	0.346108	-0.137601	0.662212	0.439774
-4.83878	0.137886	-1.4776	-0.686803	-0.912548	-0.151495	-0.610547	-0.64839	-0.602961	-0.62297	-0.185856	-0.354079	-1.04927	-0.201389	-0.7756	-0.365464	-0.444775	-0.361738	-0.085135	-0.448993	-0.398451	-0.0751779	-0.416098	-0.678672	-0.361775	0.417468	-0.373245	0.192603	-0.721673	-0.23632	-0.0241029	-0.65438	-0.864477	0.358568	-0.867986	-0.0464817	-0.109692	-0.0512417	-0.74202	-0.264906	0.520555	-0.118231	0.382886	0.0874866	-0.22315	0.603803	0.348139	-0.136027	0.661058	0.44193
-4.8378	0.137351	-1.47832	-0.688335	-0.91402	-0.153515	-0.611731	-0.650753	-0.602856	-0.625367	-0.187727	-0.35494	-1.05065	-0.200769	-0.774718	-0.366923	-0.445937	-0.363138	-0.0856815	-0.449315	-0.400745	-0.0758002	-0.41713	-0.679276	-0.363261	0.415406	-0.374868	0.192628	-0.722189	-0.236557	-0.0251082	-0.654686	-0.863607	0.358564	-0.867818	-0.0461621	-0.109626	-0.048901	-0.742044	-0.265144	0.522597	-0.118632	0.38423	0.0895672	-0.222889	0.603353	0.350165	-0.134453	0.659899	0.44409
-4.83682	0.136817	-1.47903	-0.689849	-0.915475	-0.15553	-0.612904	-0.653118	-0.602743	-0.627763	-0.189594	-0.355787	-1.05203	-0.200134	-0.773826	-0.368386	-0.447081	-0.364525	-0.0862264	-0.449631	-0.403033	-0.07642	-0.418156	-0.67987	-0.364739	0.413357	-0.376485	0.192657	-0.722691	-0.236789	-0.02611	-0.654984	-0.862752	0.35856	-0.867634	-0.0458405	-0.109559	-0.0465606	-0.742063	-0.26539	0.52462	-0.119042	0.385566	0.0916547	-0.222632	0.602906	0.352185	-0.132879	0.658735	0.446253
-4.83583	0.136285	-1.47973	-0.691345	-0.916913	-0.157537	-0.614066	-0.655486	-0.602623	-0.630158	-0.191457	-0.356621	-1.0534	-0.199483	-0.772927	-0.369853	-0.448208	-0.365899	-0.0867697	-0.44994	-0.405315	-0.0770371	-0.419176	-0.680456	-0.366208	0.411321	-0.378097	0.192687	-0.723181	-0.237017	-0.0271081	-0.655273	-0.86191	0.358556	-0.867434	-0.0455169	-0.109491	-0.0442208	-0.742076	-0.265644	0.526624	-0.11946	0.386895	0.0937487	-0.222379	0.602462	0.3542	-0.131305	0.657567	0.448419
-4.83485	0.135754	-1.48041	-0.692822	-0.918333	-0.159539	-0.615217	-0.657857	-0.602495	-0.63255	-0.193317	-0.357441	-1.05477	-0.198817	-0.772018	-0.371324	-0.449318	-0.367261	-0.0873113	-0.450243	-0.40759	-0.0776516	-0.420189	-0.681033	-0.36767	0.409298	-0.379704	0.192721	-0.723658	-0.237241	-0.0281025	-0.655553	-0.861082	0.358552	-0.867219	-0.0451913	-0.109422	-0.0418817	-0.742082	-0.265907	0.528609	-0.119887	0.388218	0.0958493	-0.222132	0.60202	0.35621	-0.129732	0.656395	0.450588
-4.83387	0.135225	-1.48108	-0.694281	-0.919735	-0.161533	-0.616357	-0.66023	-0.60236	-0.634941	-0.195172	-0.358248	-1.05612	-0.198135	-0.771102	-0.372799	-0.45041	-0.368609	-0.0878512	-0.45054	-0.409859	-0.0782633	-0.421195	-0.681601	-0.369123	0.407289	-0.381305	0.192758	-0.724122	-0.23746	-0.0290932	-0.655823	-0.860268	0.358548	-0.866987	-0.0448635	-0.109353	-0.0395435	-0.742083	-0.266178	0.530574	-0.120322	0.389533	0.0979563	-0.221889	0.60158	0.358215	-0.128159	0.655218	0.452759
-4.83288	0.134697	-1.48174	-0.695722	-0.92112	-0.163521	-0.617486	-0.662606	-0.602217	-0.63733	-0.197022	-0.35904	-1.05746	-0.197438	-0.770178	-0.374279	-0.451484	-0.369945	-0.0883893	-0.45083	-0.41212	-0.0788724	-0.422194	-0.68216	-0.370567	0.405294	-0.3829	0.192798	-0.724574	-0.237674	-0.0300801	-0.656084	-0.859468	0.358544	-0.866739	-0.0445337	-0.109283	-0.0372062	-0.742079	-0.266457	0.53252	-0.120766	0.39084	0.10007	-0.22165	0.601144	0.360214	-0.126586	0.654037	0.454933
-4.8319	0.134171	-1.48238	-0.697144	-0.922486	-0.165502	-0.618604	-0.664983	-0.602068	-0.639716	-0.198868	-0.359818	-1.0588	-0.196725	-0.769245	-0.375762	-0.452541	-0.371267	-0.0889255	-0.451114	-0.414375	-0.0794787	-0.423187	-0.68271	-0.372002	0.403313	-0.38449	0.192841	-0.725012	-0.237884	-0.031063	-0.656336	-0.858683	0.358541	-0.866475	-0.0442018	-0.109212	-0.03487	-0.742068	-0.266744	0.534445	-0.121217	0.39214	0.102189	-0.221416	0.600709	0.362208	-0.125014	0.652852	0.457108
-4.83092	0.133646	-1.48301	-0.698548	-0.923835	-0.167476	-0.61971	-0.667361	-0.60191	-0.642099	-0.200709	-0.360582	-1.06013	-0.195997	-0.768305	-0.377248	-0.453581	-0.372576	-0.0894598	-0.45139	-0.416622	-0.0800823	-0.424172	-0.68325	-0.373429	0.401346	-0.386074	0.192888	-0.725437	-0.23809	-0.0320421	-0.656577	-0.857911	0.358537	-0.866195	-0.0438679	-0.109141	-0.0325351	-0.742053	-0.267039	0.536351	-0.121677	0.393432	0.104315	-0.221187	0.600277	0.364196	-0.123443	0.651663	0.459286
-4.82993	0.133122	-1.48362	-0.699933	-0.925165	-0.169442	-0.620803	-0.669741	-0.601745	-0.64448	-0.202545	-0.361331	-1.06145	-0.195254	-0.767357	-0.378739	-0.454603	-0.373872	-0.0899921	-0.451661	-0.418862	-0.0806831	-0.425151	-0.683781	-0.374847	0.399394	-0.387652	0.192937	-0.725849	-0.238291	-0.0330172	-0.65681	-0.857153	0.358534	-0.865899	-0.0435318	-0.109069	-0.0302015	-0.742032	-0.267342	0.538236	-0.122146	0.394716	0.106447	-0.220962	0.599848	0.366179	-0.121874	0.650469	0.461465
-4.82895	0.132599	-1.48422	-0.701299	-0.926478	-0.171401	-0.621885	-0.672122	-0.601573	-0.646857	-0.204377	-0.362066	-1.06276	-0.194496	-0.766402	-0.380233	-0.455608	-0.375155	-0.0905225	-0.451924	-0.421094	-0.0812811	-0.426122	-0.684303	-0.376255	0.397456	-0.389223	0.19299	-0.726248	-0.238488	-0.0339883	-0.657032	-0.85641	0.35853	-0.865586	-0.0431936	-0.108997	-0.0278695	-0.742005	-0.267652	0.540101	-0.122623	0.395991	0.108584	-0.220741	0.59942	0.368156	-0.120305	0.649271	0.463646
-4.82797	0.132078	-1.4848	-0.702646	-0.927772	-0.173352	-0.622955	-0.674503	-0.601393	-0.649231	-0.206202	-0.362787	-1.06406	-0.193723	-0.76544	-0.38173	-0.456595	-0.376424	-0.0910507	-0.45218	-0.423319	-0.0818762	-0.427086	-0.684815	-0.377654	0.395532	-0.390788	0.193047	-0.726634	-0.23868	-0.0349553	-0.657245	-0.85568	0.358527	-0.865258	-0.0428533	-0.108924	-0.025539	-0.741974	-0.267971	0.541945	-0.123108	0.397259	0.110727	-0.220525	0.598995	0.370128	-0.118738	0.648069	0.465828
-4.82698	0.131559	-1.48537	-0.703975	-0.929048	-0.175295	-0.624012	-0.676885	-0.601206	-0.651601	-0.208023	-0.363493	-1.06535	-0.192935	-0.76447	-0.383231	-0.457564	-0.37768	-0.0915768	-0.45243	-0.425536	-0.0824684	-0.428042	-0.685317	-0.379044	0.393624	-0.392347	0.193106	-0.727006	-0.238867	-0.0359182	-0.657447	-0.854964	0.358523	-0.864913	-0.0425109	-0.10885	-0.0232104	-0.741937	-0.268297	0.543768	-0.123601	0.398517	0.112876	-0.220314	0.598572	0.372093	-0.117172	0.646863	0.468011
-4.826	0.13104	-1.48593	-0.705284	-0.930305	-0.177231	-0.625056	-0.679267	-0.601011	-0.653967	-0.209838	-0.364185	-1.06663	-0.192131	-0.763493	-0.384735	-0.458516	-0.378922	-0.0921007	-0.452672	-0.427744	-0.0830578	-0.428991	-0.68581	-0.380424	0.39173	-0.3939	0.19317	-0.727366	-0.23905	-0.0368769	-0.65764	-0.854263	0.358519	-0.864552	-0.0421663	-0.108776	-0.0208836	-0.741895	-0.26863	0.54557	-0.124103	0.399767	0.115031	-0.220107	0.598151	0.374053	-0.115609	0.645652	0.470195
-4.82502	0.130523	-1.48647	-0.706575	-0.931544	-0.179158	-0.626087	-0.68165	-0.600809	-0.65633	-0.211647	-0.364862	-1.0679	-0.191313	-0.762509	-0.386242	-0.45945	-0.380151	-0.0926223	-0.452907	-0.429944	-0.0836442	-0.429933	-0.686293	-0.381794	0.389851	-0.395445	0.193237	-0.727712	-0.239228	-0.0378314	-0.657822	-0.853575	0.358515	-0.864174	-0.0418197	-0.108702	-0.0185589	-0.741849	-0.268971	0.547351	-0.124613	0.401008	0.117191	-0.219904	0.597731	0.376007	-0.114047	0.644438	0.47238
-4.82404	0.130007	-1.487	-0.707847	-0.932765	-0.181077	-0.627106	-0.684032	-0.600599	-0.658687	-0.21345	-0.365523	-1.06916	-0.19048	-0.761519	-0.387752	-0.460367	-0.381366	-0.0931417	-0.453135	-0.432136	-0.0842277	-0.430867	-0.686766	-0.383155	0.387988	-0.396984	0.193307	-0.728045	-0.239402	-0.0387817	-0.657994	-0.852901	0.358511	-0.86378	-0.0414709	-0.108627	-0.0162363	-0.741798	-0.26932	0.54911	-0.125131	0.40224	0.119356	-0.219706	0.597314	0.377955	-0.112487	0.643219	0.474565
-4.82305	0.129492	-1.48752	-0.709099	-0.933966	-0.182987	-0.628111	-0.686413	-0.600381	-0.661041	-0.215247	-0.36617	-1.07041	-0.189633	-0.760522	-0.389264	-0.461266	-0.382567	-0.0936586	-0.453356	-0.434319	-0.0848082	-0.431793	-0.687229	-0.384505	0.38614	-0.398516	0.193381	-0.728365	-0.239571	-0.0397276	-0.658155	-0.852241	0.358507	-0.863371	-0.0411199	-0.108551	-0.013916	-0.741742	-0.269676	0.550847	-0.125657	0.403463	0.121527	-0.219512	0.596899	0.379896	-0.11093	0.641997	0.476751
-4.82207	0.128978	-1.48802	-0.710333	-0.93515	-0.184889	-0.629103	-0.688794	-0.600156	-0.663389	-0.217038	-0.366803	-1.07166	-0.18877	-0.759518	-0.39078	-0.462147	-0.383755	-0.0941732	-0.453569	-0.436494	-0.0853857	-0.432712	-0.687682	-0.385845	0.384308	-0.400042	0.19346	-0.728671	-0.239735	-0.0406692	-0.658306	-0.851595	0.358502	-0.862944	-0.0407669	-0.108476	-0.0115981	-0.741682	-0.27004	0.552562	-0.126192	0.404676	0.123702	-0.219323	0.596485	0.381832	-0.109375	0.64077	0.478937
-4.82109	0.128465	-1.4885	-0.711547	-0.936314	-0.186782	-0.630081	-0.691173	-0.599923	-0.665732	-0.218823	-0.367419	-1.07289	-0.187893	-0.758508	-0.392298	-0.463011	-0.384929	-0.0946852	-0.453775	-0.438659	-0.0859602	-0.433623	-0.688125	-0.387175	0.382491	-0.40156	0.193542	-0.728964	-0.239895	-0.0416064	-0.658446	-0.850962	0.358497	-0.862502	-0.0404117	-0.108399	-0.00928278	-0.741617	-0.27041	0.554256	-0.126735	0.40588	0.125883	-0.219137	0.596073	0.383762	-0.107823	0.639539	0.481123
-4.8201	0.127953	-1.48898	-0.712742	-0.93746	-0.188667	-0.631045	-0.693552	-0.599683	-0.66807	-0.220601	-0.368021	-1.07411	-0.187002	-0.757492	-0.393819	-0.463857	-0.386089	-0.0951948	-0.453974	-0.440815	-0.0865316	-0.434526	-0.688558	-0.388494	0.380691	-0.40307	0.193627	-0.729243	-0.24005	-0.0425392	-0.658575	-0.850344	0.358492	-0.862043	-0.0400543	-0.108323	-0.00697011	-0.741548	-0.270788	0.555927	-0.127286	0.407074	0.128068	-0.218957	0.595663	0.385685	-0.106274	0.638305	0.483309
-4.81912	0.127443	-1.48943	-0.713918	-0.938587	-0.190542	-0.631996	-0.695928	-0.599435	-0.670402	-0.222372	-0.368608	-1.07533	-0.186096	-0.756471	-0.395342	-0.464685	-0.387235	-0.0957017	-0.454164	-0.442963	-0.0871	-0.435421	-0.688981	-0.389803	0.378906	-0.404574	0.193717	-0.729509	-0.240201	-0.0434675	-0.658694	-0.849739	0.358486	-0.861568	-0.0396948	-0.108245	-0.00466024	-0.741474	-0.271173	0.557575	-0.127845	0.408258	0.130258	-0.21878	0.595254	0.387602	-0.104728	0.637066	0.485494
-4.81814	0.126933	-1.48988	-0.715074	-0.939695	-0.192408	-0.632932	-0.698303	-0.59918	-0.672729	-0.224137	-0.369179	-1.07653	-0.185176	-0.755443	-0.396868	-0.465496	-0.388367	-0.096206	-0.454347	-0.4451	-0.0876653	-0.436308	-0.689393	-0.391101	0.377137	-0.40607	0.193811	-0.729762	-0.240347	-0.0443913	-0.658801	-0.849148	0.35848	-0.861077	-0.0393332	-0.108168	-0.00235328	-0.741397	-0.271565	0.559201	-0.128412	0.409432	0.132453	-0.218608	0.594847	0.389513	-0.103185	0.635823	0.487678
-4.81715	0.126425	-1.49031	-0.716211	-0.940783	-0.194264	-0.633854	-0.700676	-0.598917	-0.675049	-0.225895	-0.369735	-1.07772	-0.184242	-0.75441	-0.398395	-0.466289	-0.389485	-0.0967076	-0.454523	-0.447228	-0.0882275	-0.437187	-0.689795	-0.392388	0.375385	-0.407559	0.193909	-0.730001	-0.240488	-0.0453105	-0.658898	-0.84857	0.358474	-0.860569	-0.0389695	-0.10809	-4.93765e-05	-0.741316	-0.271964	0.560805	-0.128987	0.410596	0.134653	-0.218439	0.594441	0.391417	-0.101645	0.634577	0.489862
-4.81617	0.125917	-1.49072	-0.717329	-0.941853	-0.196111	-0.634761	-0.703047	-0.598646	-0.677364	-0.227646	-0.370276	-1.0789	-0.183293	-0.753371	-0.399925	-0.467065	-0.39059	-0.0972065	-0.45469	-0.449347	-0.0887866	-0.438057	-0.690187	-0.393664	0.373649	-0.40904	0.194012	-0.730227	-0.240624	-0.0462251	-0.658983	-0.848007	0.358467	-0.860045	-0.0386036	-0.108012	0.00225136	-0.741231	-0.272369	0.562385	-0.12957	0.411749	0.136856	-0.218276	0.594036	0.393315	-0.100109	0.633326	0.492045
-4.81519	0.12541	-1.49112	-0.718427	-0.942904	-0.197948	-0.635654	-0.705415	-0.598368	-0.679671	-0.22939	-0.370801	-1.08008	-0.182331	-0.752327	-0.401457	-0.467823	-0.39168	-0.0977025	-0.45485	-0.451455	-0.0893426	-0.43892	-0.690569	-0.394929	0.37193	-0.410513	0.194118	-0.730439	-0.240756	-0.0471352	-0.659057	-0.847456	0.358459	-0.859505	-0.0382356	-0.107934	0.00454879	-0.741142	-0.272782	0.563942	-0.130161	0.412892	0.139064	-0.218116	0.593633	0.395207	-0.0985771	0.632072	0.494226
-4.81421	0.124904	-1.49151	-0.719506	-0.943936	-0.199776	-0.636531	-0.707781	-0.598082	-0.681972	-0.231126	-0.371311	-1.08124	-0.181354	-0.751277	-0.402991	-0.468563	-0.392756	-0.0981957	-0.455002	-0.453554	-0.0898953	-0.439774	-0.690939	-0.396183	0.370227	-0.411978	0.194229	-0.730637	-0.240882	-0.0480405	-0.65912	-0.84692	0.358452	-0.858949	-0.0378654	-0.107855	0.00684281	-0.741049	-0.2732	0.565476	-0.13076	0.414025	0.141277	-0.217961	0.59323	0.397091	-0.0970487	0.630813	0.496406
-4.81322	0.124399	-1.49188	-0.720565	-0.944949	-0.201594	-0.637394	-0.710143	-0.597789	-0.684266	-0.232855	-0.371805	-1.08239	-0.180364	-0.750223	-0.404526	-0.469286	-0.393818	-0.0986859	-0.455146	-0.455642	-0.0904449	-0.44062	-0.6913	-0.397425	0.368541	-0.413436	0.194344	-0.730822	-0.241004	-0.0489412	-0.659171	-0.846397	0.358443	-0.858376	-0.0374932	-0.107777	0.00913328	-0.740953	-0.273626	0.566986	-0.131367	0.415146	0.143493	-0.217809	0.592829	0.39897	-0.0955245	0.629551	0.498584
-4.81224	0.123895	-1.49224	-0.721605	-0.945942	-0.203401	-0.638241	-0.712502	-0.597488	-0.686553	-0.234576	-0.372283	-1.08353	-0.17936	-0.749164	-0.406063	-0.469992	-0.394866	-0.0991732	-0.455282	-0.45772	-0.0909913	-0.441458	-0.69165	-0.398656	0.366872	-0.414886	0.194464	-0.730994	-0.241122	-0.0498371	-0.65921	-0.845887	0.358434	-0.857787	-0.0371188	-0.107698	0.0114201	-0.740853	-0.274058	0.568473	-0.131982	0.416257	0.145713	-0.217662	0.592429	0.400841	-0.0940045	0.628285	0.50076
-4.81126	0.123391	-1.49258	-0.722626	-0.946916	-0.205198	-0.639072	-0.714858	-0.59718	-0.688833	-0.23629	-0.372746	-1.08466	-0.178342	-0.7481	-0.407602	-0.47068	-0.3959	-0.0996574	-0.455409	-0.459787	-0.0915345	-0.442287	-0.691989	-0.399875	0.365219	-0.416327	0.194588	-0.731152	-0.241234	-0.0507283	-0.659238	-0.845391	0.358424	-0.857182	-0.0367423	-0.107619	0.0137031	-0.74075	-0.274496	0.569936	-0.132604	0.417357	0.147937	-0.217519	0.59203	0.402706	-0.092489	0.627016	0.502935
-4.81027	0.122888	-1.49291	-0.723626	-0.947871	-0.206985	-0.639888	-0.71721	-0.596864	-0.691105	-0.237996	-0.373192	-1.08578	-0.177311	-0.747032	-0.409142	-0.47135	-0.396919	-0.100139	-0.455529	-0.461843	-0.0920744	-0.443107	-0.692317	-0.401083	0.363584	-0.41776	0.194717	-0.731296	-0.241342	-0.0516147	-0.659254	-0.844908	0.358413	-0.85656	-0.0363638	-0.107539	0.0159822	-0.740644	-0.274941	0.571376	-0.133235	0.418445	0.150165	-0.21738	0.591632	0.404564	-0.0909782	0.625742	0.505107
-4.80929	0.122386	-1.49322	-0.724607	-0.948807	-0.208762	-0.640689	-0.719558	-0.596541	-0.693369	-0.239694	-0.373624	-1.08689	-0.176266	-0.745959	-0.410683	-0.472003	-0.397924	-0.100617	-0.45564	-0.463889	-0.0926111	-0.443919	-0.692635	-0.402278	0.361967	-0.419185	0.194851	-0.731427	-0.241445	-0.0524963	-0.659258	-0.844438	0.358402	-0.855923	-0.0359831	-0.10746	0.0182573	-0.740535	-0.275391	0.572791	-0.133873	0.419522	0.152396	-0.217245	0.591234	0.406415	-0.0894722	0.624465	0.507277
-4.80831	0.121885	-1.49352	-0.725569	-0.949723	-0.210528	-0.641473	-0.721902	-0.59621	-0.695625	-0.241383	-0.374039	-1.08799	-0.175209	-0.744883	-0.412226	-0.472639	-0.398915	-0.101091	-0.455744	-0.465924	-0.0931445	-0.444723	-0.692942	-0.403462	0.360366	-0.420602	0.194989	-0.731543	-0.241542	-0.0533731	-0.65925	-0.843982	0.35839	-0.855269	-0.0356004	-0.107381	0.0205282	-0.740423	-0.275848	0.574182	-0.134519	0.420588	0.15463	-0.217115	0.590838	0.408259	-0.0879713	0.623184	0.509444
-4.80732	0.121384	-1.49381	-0.726511	-0.95062	-0.212283	-0.642241	-0.724241	-0.595872	-0.697873	-0.243065	-0.374438	-1.08907	-0.174137	-0.743802	-0.41377	-0.473257	-0.399892	-0.101563	-0.455838	-0.467948	-0.0936746	-0.445518	-0.693239	-0.404634	0.358783	-0.42201	0.195132	-0.731647	-0.241636	-0.0542449	-0.65923	-0.843539	0.358377	-0.854599	-0.0352156	-0.107301	0.0227949	-0.740308	-0.276311	0.575549	-0.135172	0.421642	0.156868	-0.216988	0.590442	0.410096	-0.0864755	0.621899	0.511608
-4.80634	0.120883	-1.49408	-0.727433	-0.951497	-0.214027	-0.642992	-0.726576	-0.595527	-0.700112	-0.244738	-0.374822	-1.09015	-0.173053	-0.742717	-0.415314	-0.473858	-0.400855	-0.102031	-0.455925	-0.46996	-0.0942014	-0.446304	-0.693524	-0.405793	0.357218	-0.423409	0.19528	-0.731737	-0.241724	-0.0551119	-0.659198	-0.843109	0.358363	-0.853913	-0.0348287	-0.107222	0.0250572	-0.74019	-0.276779	0.576891	-0.135833	0.422685	0.159109	-0.216866	0.590046	0.411926	-0.0849852	0.62061	0.513769
-4.80536	0.120383	-1.49433	-0.728336	-0.952355	-0.21576	-0.643727	-0.728906	-0.595174	-0.702342	-0.246403	-0.375189	-1.09122	-0.171956	-0.741629	-0.41686	-0.474442	-0.401803	-0.102496	-0.456003	-0.471961	-0.0947249	-0.447081	-0.693799	-0.406941	0.35567	-0.4248	0.195433	-0.731813	-0.241807	-0.0559739	-0.659153	-0.842692	0.358349	-0.853211	-0.0344398	-0.107142	0.027315	-0.740069	-0.277253	0.578209	-0.136502	0.423715	0.161354	-0.216747	0.589651	0.413749	-0.0835004	0.619318	0.515927
-4.80438	0.119884	-1.49458	-0.729219	-0.953194	-0.217482	-0.644446	-0.731231	-0.594814	-0.704564	-0.24806	-0.375541	-1.09227	-0.170846	-0.740537	-0.418406	-0.475008	-0.402737	-0.102958	-0.456073	-0.473951	-0.0952451	-0.44785	-0.694062	-0.408075	0.35414	-0.426182	0.195591	-0.731875	-0.241885	-0.056831	-0.659096	-0.842288	0.358333	-0.852493	-0.0340489	-0.107062	0.0295682	-0.739947	-0.277733	0.579502	-0.137178	0.424734	0.163601	-0.216633	0.589257	0.415564	-0.0820213	0.618022	0.518082
-4.80339	0.119385	-1.4948	-0.730082	-0.954013	-0.219192	-0.645147	-0.73355	-0.594446	-0.706776	-0.249707	-0.375876	-1.09331	-0.169724	-0.739442	-0.419953	-0.475558	-0.403656	-0.103416	-0.456134	-0.475928	-0.0957619	-0.448609	-0.694315	-0.409198	0.352628	-0.427556	0.195754	-0.731923	-0.241959	-0.0576832	-0.659027	-0.841898	0.358316	-0.851759	-0.0336559	-0.106983	0.0318166	-0.739821	-0.278219	0.58077	-0.137862	0.425741	0.165851	-0.216522	0.588862	0.417373	-0.0805482	0.616722	0.520233
-4.80241	0.118886	-1.49502	-0.730926	-0.954812	-0.220891	-0.645831	-0.735864	-0.594071	-0.708979	-0.251346	-0.376196	-1.09435	-0.168589	-0.738344	-0.4215	-0.47609	-0.404561	-0.10387	-0.456187	-0.477894	-0.0962753	-0.44936	-0.694557	-0.410307	0.351134	-0.42892	0.195922	-0.731958	-0.242027	-0.0585303	-0.658945	-0.84152	0.358299	-0.851008	-0.033261	-0.106904	0.0340602	-0.739694	-0.27871	0.582013	-0.138553	0.426735	0.168103	-0.216416	0.588468	0.419174	-0.0790812	0.615419	0.52238
-4.80143	0.118388	-1.49522	-0.73175	-0.955592	-0.222579	-0.646498	-0.738173	-0.593689	-0.711172	-0.252977	-0.376499	-1.09537	-0.167441	-0.737242	-0.423048	-0.476605	-0.405452	-0.104321	-0.456231	-0.479848	-0.0967854	-0.450102	-0.694788	-0.411405	0.349657	-0.430276	0.196095	-0.73198	-0.242091	-0.0593724	-0.65885	-0.841155	0.35828	-0.850242	-0.032864	-0.106824	0.0362988	-0.739564	-0.279206	0.583231	-0.139251	0.427717	0.170359	-0.216313	0.588075	0.420968	-0.0776205	0.614112	0.524523
-4.80044	0.11789	-1.4954	-0.732554	-0.956353	-0.224255	-0.647148	-0.740475	-0.5933	-0.713356	-0.254598	-0.376786	-1.09637	-0.166281	-0.736138	-0.424596	-0.477103	-0.406329	-0.104769	-0.456266	-0.48179	-0.0972921	-0.450835	-0.695007	-0.412489	0.348199	-0.431622	0.196274	-0.731987	-0.242149	-0.0602095	-0.658742	-0.840802	0.35826	-0.84946	-0.0324651	-0.106745	0.0385324	-0.739432	-0.279707	0.584424	-0.139957	0.428687	0.172616	-0.216215	0.587681	0.422755	-0.0761663	0.612802	0.526662
-4.79946	0.117392	-1.49557	-0.733339	-0.957094	-0.225919	-0.64778	-0.742771	-0.592903	-0.715529	-0.25621	-0.377058	-1.09737	-0.165109	-0.735032	-0.426144	-0.477584	-0.407191	-0.105212	-0.456293	-0.483719	-0.0977954	-0.451559	-0.695216	-0.41356	0.346759	-0.43296	0.196457	-0.731981	-0.242203	-0.0610416	-0.658621	-0.840463	0.358239	-0.848662	-0.0320642	-0.106666	0.0407608	-0.739298	-0.280213	0.585592	-0.14067	0.429645	0.174876	-0.21612	0.587288	0.424534	-0.0747188	0.611488	0.528797
-4.79848	0.116894	-1.49573	-0.734104	-0.957815	-0.227571	-0.648395	-0.745061	-0.592499	-0.717692	-0.257813	-0.377313	-1.09836	-0.163925	-0.733922	-0.427692	-0.478048	-0.408038	-0.105652	-0.456311	-0.485637	-0.0982953	-0.452275	-0.695414	-0.414618	0.345338	-0.434288	0.196647	-0.731961	-0.242251	-0.0618685	-0.658488	-0.840136	0.358217	-0.847848	-0.0316614	-0.106588	0.0429839	-0.739162	-0.280725	0.586734	-0.14139	0.43059	0.177138	-0.21603	0.586894	0.426306	-0.0732781	0.61017	0.530927
-4.79749	0.116397	-1.49587	-0.734849	-0.958517	-0.229211	-0.648991	-0.747344	-0.592088	-0.719845	-0.259407	-0.377552	-1.09933	-0.162729	-0.732811	-0.42924	-0.478495	-0.408872	-0.106089	-0.456321	-0.487541	-0.0987917	-0.452981	-0.695601	-0.415664	0.343935	-0.435607	0.196841	-0.731928	-0.242295	-0.0626904	-0.658341	-0.839821	0.358193	-0.847019	-0.0312566	-0.106509	0.0452016	-0.739025	-0.281241	0.587851	-0.142117	0.431522	0.179403	-0.215943	0.5865	0.42807	-0.0718445	0.608849	0.533052
-4.79651	0.1159	-1.496	-0.735575	-0.959199	-0.230839	-0.64957	-0.749621	-0.59167	-0.721987	-0.260991	-0.377774	-1.1003	-0.161521	-0.731697	-0.430788	-0.478926	-0.409691	-0.106521	-0.456322	-0.489433	-0.0992848	-0.453678	-0.695776	-0.416696	0.34255	-0.436916	0.197041	-0.73188	-0.242333	-0.0635073	-0.658181	-0.839519	0.358169	-0.846173	-0.03085	-0.106431	0.0474137	-0.738886	-0.281762	0.588943	-0.142851	0.432441	0.181669	-0.21586	0.586107	0.429827	-0.0704181	0.607524	0.535173
-4.79553	0.115402	-1.49612	-0.736281	-0.959862	-0.232455	-0.65013	-0.75189	-0.591245	-0.724118	-0.262566	-0.377981	-1.10125	-0.160302	-0.730581	-0.432336	-0.479339	-0.410496	-0.10695	-0.456314	-0.491312	-0.0997744	-0.454366	-0.69594	-0.417715	0.341183	-0.438216	0.197247	-0.731819	-0.242367	-0.064319	-0.658008	-0.83923	0.358142	-0.845312	-0.0304415	-0.106353	0.0496203	-0.738746	-0.282287	0.590008	-0.143592	0.433347	0.183937	-0.215781	0.585713	0.431575	-0.0689991	0.606195	0.537288
-4.79454	0.114905	-1.49622	-0.736967	-0.960505	-0.234058	-0.650672	-0.754152	-0.590813	-0.726239	-0.264131	-0.378171	-1.10219	-0.159071	-0.729464	-0.433883	-0.479736	-0.411286	-0.107374	-0.456297	-0.493178	-0.100261	-0.455045	-0.696094	-0.41872	0.339836	-0.439507	0.197459	-0.731745	-0.242395	-0.0651255	-0.657821	-0.838952	0.358115	-0.844435	-0.0300311	-0.106276	0.0518211	-0.738604	-0.282818	0.591048	-0.144341	0.434241	0.186206	-0.215706	0.585318	0.433317	-0.0675876	0.604864	0.539398
-4.79356	0.114408	-1.4963	-0.737634	-0.961129	-0.235649	-0.651195	-0.756407	-0.590374	-0.728347	-0.265687	-0.378345	-1.10312	-0.157829	-0.728345	-0.43543	-0.480117	-0.412062	-0.107795	-0.456271	-0.495032	-0.100743	-0.455714	-0.696236	-0.419712	0.338507	-0.440788	0.197676	-0.731656	-0.242418	-0.065927	-0.657621	-0.838687	0.358086	-0.843543	-0.0296188	-0.106199	0.0540161	-0.738461	-0.283352	0.592062	-0.145096	0.435121	0.188478	-0.215635	0.584923	0.43505	-0.066184	0.603528	0.541502
-4.79258	0.11391	-1.49637	-0.738282	-0.961733	-0.237228	-0.651699	-0.758654	-0.589928	-0.730445	-0.267233	-0.378503	-1.10404	-0.156576	-0.727224	-0.436976	-0.48048	-0.412824	-0.108212	-0.456237	-0.496872	-0.101223	-0.456375	-0.696367	-0.420691	0.337196	-0.44206	0.197899	-0.731554	-0.242436	-0.0667233	-0.657407	-0.838435	0.358055	-0.842635	-0.0292048	-0.106122	0.0562051	-0.738317	-0.283891	0.59305	-0.145858	0.435989	0.19075	-0.215568	0.584528	0.436776	-0.0647882	0.602189	0.543601
-4.7916	0.113413	-1.49643	-0.738909	-0.962317	-0.238793	-0.652185	-0.760893	-0.589476	-0.732531	-0.268769	-0.378645	-1.10494	-0.155311	-0.726102	-0.438521	-0.480828	-0.413571	-0.108624	-0.456194	-0.498698	-0.101698	-0.457027	-0.696487	-0.421655	0.335905	-0.443322	0.198127	-0.731439	-0.242449	-0.0675145	-0.65718	-0.838194	0.358023	-0.841712	-0.0287889	-0.106045	0.0583881	-0.738172	-0.284433	0.594012	-0.146626	0.436843	0.193024	-0.215505	0.584132	0.438494	-0.0634007	0.600847	0.545693
-4.79061	0.112915	-1.49648	-0.739518	-0.962882	-0.240346	-0.652652	-0.763124	-0.589016	-0.734604	-0.270296	-0.378771	-1.10583	-0.154036	-0.724979	-0.440065	-0.481159	-0.414304	-0.109033	-0.456141	-0.500511	-0.102171	-0.457669	-0.696596	-0.422607	0.334632	-0.444574	0.198362	-0.731309	-0.242457	-0.0683005	-0.656938	-0.837965	0.35799	-0.840773	-0.0283713	-0.10597	0.060565	-0.738025	-0.28498	0.594948	-0.147401	0.437684	0.195299	-0.215445	0.583736	0.440204	-0.0620214	0.599501	0.54778
-4.78963	0.112417	-1.49651	-0.740106	-0.963427	-0.241886	-0.653099	-0.765347	-0.58855	-0.736666	-0.271812	-0.37888	-1.10672	-0.15275	-0.723855	-0.441609	-0.481474	-0.415023	-0.109437	-0.45608	-0.502311	-0.10264	-0.458302	-0.696693	-0.423544	0.333378	-0.445817	0.198603	-0.731166	-0.24246	-0.0690814	-0.656683	-0.837748	0.357954	-0.839819	-0.027952	-0.105894	0.0627356	-0.737879	-0.285531	0.595858	-0.148183	0.438511	0.197576	-0.21539	0.583339	0.441906	-0.0606506	0.598152	0.54986
-4.78865	0.111919	-1.49652	-0.740675	-0.963953	-0.243412	-0.653528	-0.767562	-0.588077	-0.738716	-0.273319	-0.378973	-1.10759	-0.151454	-0.722731	-0.443151	-0.481772	-0.415728	-0.109837	-0.45601	-0.504097	-0.103105	-0.458926	-0.69678	-0.424468	0.332143	-0.44705	0.198849	-0.731009	-0.242457	-0.069857	-0.656415	-0.837543	0.357917	-0.838849	-0.0275309	-0.105819	0.0648999	-0.737731	-0.286085	0.596741	-0.148972	0.439325	0.199853	-0.215338	0.582941	0.4436	-0.0592885	0.596799	0.551934
-4.78766	0.11142	-1.49653	-0.741225	-0.964459	-0.244926	-0.653936	-0.769768	-0.587597	-0.740753	-0.274815	-0.37905	-1.10845	-0.150147	-0.721605	-0.444692	-0.482055	-0.416418	-0.110233	-0.455932	-0.505869	-0.103567	-0.459541	-0.696855	-0.425378	0.330927	-0.448273	0.199102	-0.730839	-0.24245	-0.0706276	-0.656132	-0.83735	0.357879	-0.837865	-0.0271081	-0.105745	0.0670577	-0.737583	-0.286644	0.597598	-0.149767	0.440125	0.202131	-0.21529	0.582542	0.445286	-0.0579352	0.595443	0.554002
-4.78668	0.110921	-1.49651	-0.741755	-0.964946	-0.246426	-0.654325	-0.771965	-0.587111	-0.742777	-0.276301	-0.379111	-1.10929	-0.14883	-0.72048	-0.446232	-0.482321	-0.417094	-0.110625	-0.455844	-0.507628	-0.104025	-0.460146	-0.696919	-0.426273	0.32973	-0.449486	0.199361	-0.730655	-0.242437	-0.0713929	-0.655835	-0.837168	0.357838	-0.836865	-0.0266837	-0.105671	0.0692089	-0.737434	-0.287205	0.598429	-0.150568	0.440912	0.204409	-0.215246	0.582143	0.446964	-0.056591	0.594084	0.556062
-4.7857	0.110422	-1.49649	-0.742266	-0.965413	-0.247913	-0.654695	-0.774153	-0.586618	-0.744789	-0.277777	-0.379156	-1.11013	-0.147503	-0.719354	-0.44777	-0.482571	-0.417756	-0.111012	-0.455747	-0.509372	-0.10448	-0.460743	-0.696972	-0.427155	0.328552	-0.450689	0.199626	-0.730457	-0.242419	-0.0721531	-0.655523	-0.836998	0.357796	-0.83585	-0.0262576	-0.105598	0.0713535	-0.737285	-0.28777	0.599233	-0.151375	0.441685	0.206688	-0.215206	0.581742	0.448634	-0.055256	0.592721	0.558116
-4.78471	0.109922	-1.49645	-0.742758	-0.965861	-0.249387	-0.655044	-0.776332	-0.586119	-0.746788	-0.279242	-0.379185	-1.11095	-0.146166	-0.718228	-0.449306	-0.482806	-0.418404	-0.111395	-0.455641	-0.511102	-0.104931	-0.46133	-0.697014	-0.428023	0.327393	-0.451882	0.199898	-0.730246	-0.242395	-0.0729081	-0.655198	-0.836839	0.357752	-0.83482	-0.0258299	-0.105526	0.0734914	-0.737136	-0.288338	0.600011	-0.152189	0.442445	0.208968	-0.215169	0.58134	0.450295	-0.0539304	0.591355	0.560162
-4.78373	0.109421	-1.4964	-0.74323	-0.96629	-0.250847	-0.655374	-0.778502	-0.585613	-0.748773	-0.280697	-0.379198	-1.11176	-0.144819	-0.717102	-0.450841	-0.483025	-0.419038	-0.111774	-0.455526	-0.512818	-0.105379	-0.461908	-0.697045	-0.428877	0.326253	-0.453065	0.200175	-0.730021	-0.242367	-0.073658	-0.654858	-0.836692	0.357706	-0.833775	-0.0254007	-0.105454	0.0756224	-0.736987	-0.28891	0.600763	-0.153009	0.44319	0.211247	-0.215136	0.580938	0.451949	-0.0526143	0.589986	0.562201
-4.78275	0.10892	-1.49633	-0.743683	-0.966699	-0.252293	-0.655683	-0.780662	-0.585101	-0.750745	-0.282142	-0.379194	-1.11256	-0.143463	-0.715976	-0.452375	-0.483228	-0.419657	-0.112148	-0.455403	-0.51452	-0.105824	-0.462476	-0.697065	-0.429716	0.325133	-0.454238	0.20046	-0.729783	-0.242333	-0.0744027	-0.654504	-0.836556	0.357658	-0.832715	-0.0249699	-0.105383	0.0777465	-0.736838	-0.289484	0.601487	-0.153835	0.443922	0.213527	-0.215107	0.580534	0.453594	-0.051308	0.588613	0.564232
-4.78177	0.108419	-1.49625	-0.744117	-0.967088	-0.253726	-0.655972	-0.782812	-0.584583	-0.752703	-0.283576	-0.379175	-1.11334	-0.142097	-0.714851	-0.453906	-0.483415	-0.420263	-0.112517	-0.45527	-0.516207	-0.106265	-0.463036	-0.697074	-0.430541	0.324031	-0.4554	0.20075	-0.729531	-0.242293	-0.0751422	-0.654135	-0.836431	0.357608	-0.83164	-0.0245375	-0.105313	0.0798636	-0.736689	-0.290061	0.602186	-0.154667	0.44464	0.215807	-0.215082	0.580129	0.455231	-0.0500116	0.587237	0.566256
-4.78078	0.107916	-1.49616	-0.744531	-0.967459	-0.255145	-0.656241	-0.784953	-0.584058	-0.754648	-0.285	-0.379139	-1.11412	-0.140723	-0.713726	-0.455435	-0.483587	-0.420855	-0.112882	-0.455129	-0.517879	-0.106702	-0.463586	-0.697071	-0.431352	0.322949	-0.456553	0.201047	-0.729266	-0.242249	-0.0758766	-0.653751	-0.836318	0.357556	-0.83055	-0.0241037	-0.105244	0.0819735	-0.73654	-0.290641	0.602857	-0.155505	0.445344	0.218087	-0.215061	0.579722	0.456859	-0.0487253	0.585857	0.568272
-4.7798	0.107413	-1.49605	-0.744926	-0.96781	-0.25655	-0.656489	-0.787084	-0.583528	-0.756579	-0.286413	-0.379088	-1.11488	-0.139339	-0.712602	-0.456962	-0.483744	-0.421432	-0.113243	-0.454978	-0.519537	-0.107136	-0.464127	-0.697058	-0.432148	0.321886	-0.457695	0.201351	-0.728987	-0.242199	-0.0766058	-0.653353	-0.836215	0.357502	-0.829446	-0.0236685	-0.105175	0.0840762	-0.736391	-0.291223	0.603502	-0.156348	0.446034	0.220366	-0.215044	0.579314	0.45848	-0.0474493	0.584475	0.57028
-4.77882	0.10691	-1.49594	-0.745303	-0.968141	-0.257941	-0.656716	-0.789204	-0.582991	-0.758496	-0.287815	-0.37902	-1.11563	-0.137946	-0.711479	-0.458487	-0.483885	-0.421996	-0.113598	-0.454818	-0.52118	-0.107566	-0.464659	-0.697033	-0.43293	0.320843	-0.458827	0.201662	-0.728695	-0.242144	-0.0773298	-0.65294	-0.836123	0.357446	-0.828327	-0.0232318	-0.105107	0.0861716	-0.736243	-0.291808	0.60412	-0.157198	0.44671	0.222646	-0.21503	0.578904	0.460091	-0.0461838	0.583089	0.572279
-4.77783	0.106405	-1.4958	-0.74566	-0.968454	-0.259318	-0.656923	-0.791314	-0.582448	-0.760398	-0.289206	-0.378937	-1.11637	-0.136545	-0.710358	-0.46001	-0.484012	-0.422546	-0.113949	-0.45465	-0.522808	-0.107993	-0.465182	-0.696998	-0.433698	0.319818	-0.459949	0.201979	-0.728389	-0.242083	-0.0780488	-0.652513	-0.836042	0.357387	-0.827194	-0.0227937	-0.10504	0.0882597	-0.736096	-0.292395	0.604711	-0.158053	0.447371	0.224924	-0.21502	0.578493	0.461694	-0.0449289	0.581699	0.574271
-4.77685	0.105899	-1.49566	-0.745998	-0.968747	-0.260681	-0.657108	-0.793414	-0.5819	-0.762286	-0.290587	-0.378838	-1.1171	-0.135135	-0.709237	-0.46153	-0.484123	-0.423082	-0.114296	-0.454472	-0.524421	-0.108417	-0.465696	-0.696952	-0.434451	0.318813	-0.461061	0.202303	-0.72807	-0.242017	-0.0787626	-0.65207	-0.835971	0.357326	-0.826047	-0.0223543	-0.104975	0.0903402	-0.735949	-0.292985	0.605276	-0.158914	0.448019	0.227202	-0.215014	0.578081	0.463289	-0.0436847	0.580307	0.576253
-4.77587	0.105393	-1.4955	-0.746317	-0.969021	-0.26203	-0.657273	-0.795502	-0.581345	-0.764159	-0.291957	-0.378723	-1.11781	-0.133716	-0.708118	-0.463047	-0.484219	-0.423604	-0.114637	-0.454286	-0.526019	-0.108836	-0.4662	-0.696894	-0.435189	0.317827	-0.462162	0.202633	-0.727737	-0.241946	-0.0794713	-0.651612	-0.835911	0.357263	-0.824885	-0.0219135	-0.10491	0.0924132	-0.735803	-0.293576	0.605813	-0.15978	0.448652	0.229479	-0.215011	0.577667	0.464875	-0.0424516	0.578911	0.578227
-4.77488	0.104885	-1.49533	-0.746618	-0.969276	-0.263365	-0.657416	-0.79758	-0.580785	-0.766017	-0.293316	-0.378593	-1.11851	-0.13229	-0.707	-0.464562	-0.4843	-0.424112	-0.114974	-0.454091	-0.527602	-0.109253	-0.466695	-0.696826	-0.435913	0.316861	-0.463253	0.202971	-0.727392	-0.241869	-0.0801749	-0.65114	-0.835862	0.357198	-0.823708	-0.0214715	-0.104846	0.0944785	-0.735658	-0.294169	0.606324	-0.160651	0.449271	0.231756	-0.215013	0.57725	0.466453	-0.0412296	0.577513	0.580192
-4.7739	0.104377	-1.49514	-0.746899	-0.969511	-0.264685	-0.657538	-0.799647	-0.580219	-0.767861	-0.294664	-0.378446	-1.1192	-0.130856	-0.705885	-0.466074	-0.484367	-0.424607	-0.115306	-0.453887	-0.529169	-0.109666	-0.467182	-0.696747	-0.436622	0.315914	-0.464333	0.203315	-0.727032	-0.241787	-0.0808734	-0.650652	-0.835823	0.35713	-0.822518	-0.0210283	-0.104783	0.0965361	-0.735514	-0.294764	0.606808	-0.161528	0.449876	0.234031	-0.215018	0.576833	0.468021	-0.0400189	0.57611	0.582148
-4.77292	0.103867	-1.49494	-0.747162	-0.969728	-0.26599	-0.657639	-0.801703	-0.579647	-0.769689	-0.296001	-0.378284	-1.11988	-0.129413	-0.704771	-0.467583	-0.484419	-0.425088	-0.115633	-0.453673	-0.530722	-0.110075	-0.467659	-0.696658	-0.437317	0.314986	-0.465403	0.203667	-0.72666	-0.2417	-0.0815668	-0.650149	-0.835794	0.35706	-0.821313	-0.0205838	-0.104721	0.0985858	-0.735371	-0.295361	0.607265	-0.16241	0.450467	0.236305	-0.215027	0.576413	0.469582	-0.0388196	0.574705	0.584095
-4.77193	0.103356	-1.49473	-0.747406	-0.969926	-0.267281	-0.657718	-0.803748	-0.57907	-0.771502	-0.297327	-0.378107	-1.12055	-0.127964	-0.703659	-0.469089	-0.484457	-0.425556	-0.115955	-0.453451	-0.532258	-0.110481	-0.468127	-0.696557	-0.437996	0.314078	-0.466463	0.204026	-0.726274	-0.241607	-0.0822552	-0.649631	-0.835775	0.356987	-0.820095	-0.0201382	-0.10466	0.100628	-0.73523	-0.295959	0.607696	-0.163298	0.451043	0.238578	-0.215039	0.575991	0.471133	-0.0376321	0.573297	0.586032
-4.77095	0.102844	-1.49451	-0.747631	-0.970104	-0.268558	-0.657775	-0.805781	-0.578488	-0.7733	-0.298642	-0.377914	-1.1212	-0.126507	-0.70255	-0.470591	-0.48448	-0.42601	-0.116273	-0.453221	-0.533779	-0.110884	-0.468586	-0.696446	-0.438661	0.313189	-0.467512	0.204391	-0.725875	-0.241508	-0.0829386	-0.649097	-0.835767	0.356912	-0.818863	-0.0196914	-0.1046	0.102662	-0.735089	-0.296559	0.608099	-0.16419	0.451605	0.240849	-0.215056	0.575567	0.472676	-0.0364563	0.571885	0.58796
-4.76997	0.102331	-1.49427	-0.747838	-0.970264	-0.26982	-0.657811	-0.807802	-0.5779	-0.775082	-0.299946	-0.377705	-1.12184	-0.125042	-0.701443	-0.472091	-0.484489	-0.42645	-0.116585	-0.452981	-0.535285	-0.111283	-0.469036	-0.696324	-0.439312	0.312319	-0.46855	0.204764	-0.725463	-0.241404	-0.0836169	-0.648549	-0.835768	0.356835	-0.817617	-0.0192436	-0.104542	0.104687	-0.73495	-0.297159	0.608476	-0.165087	0.452152	0.243119	-0.215076	0.575141	0.47421	-0.0352926	0.570471	0.589878
-4.76899	0.101816	-1.49402	-0.748026	-0.970405	-0.271067	-0.657824	-0.809812	-0.577307	-0.776848	-0.301238	-0.377481	-1.12247	-0.123571	-0.700339	-0.473587	-0.484484	-0.426877	-0.116892	-0.452732	-0.536775	-0.111679	-0.469477	-0.696191	-0.439947	0.311468	-0.469579	0.205144	-0.725038	-0.241295	-0.0842902	-0.647984	-0.835779	0.356754	-0.816357	-0.0187947	-0.104485	0.106705	-0.734813	-0.297761	0.608826	-0.165989	0.452686	0.245387	-0.2151	0.574713	0.475735	-0.034141	0.569053	0.591786
-4.768	0.1013	-1.49376	-0.748196	-0.970527	-0.272299	-0.657816	-0.81181	-0.576708	-0.778599	-0.30252	-0.377242	-1.12309	-0.122093	-0.699237	-0.47508	-0.484465	-0.427291	-0.117194	-0.452475	-0.538249	-0.112071	-0.469909	-0.696048	-0.440568	0.310637	-0.470596	0.205532	-0.7246	-0.24118	-0.0849585	-0.647404	-0.8358	0.356671	-0.815084	-0.0183448	-0.104429	0.108714	-0.734678	-0.298364	0.609149	-0.166896	0.453204	0.247653	-0.215127	0.574283	0.477251	-0.0330018	0.567632	0.593684
-4.76702	0.100783	-1.49349	-0.748347	-0.97063	-0.273517	-0.657786	-0.813796	-0.576104	-0.780333	-0.30379	-0.376987	-1.12369	-0.120608	-0.698138	-0.476569	-0.484432	-0.427692	-0.117491	-0.452209	-0.539707	-0.11246	-0.470332	-0.695894	-0.441174	0.309825	-0.471603	0.205926	-0.724148	-0.241059	-0.0856219	-0.646809	-0.83583	0.356586	-0.813797	-0.017894	-0.104374	0.110716	-0.734544	-0.298967	0.609445	-0.167807	0.453709	0.249918	-0.215159	0.573851	0.478758	-0.031875	0.566208	0.595572
-4.76604	0.100264	-1.4932	-0.74848	-0.970715	-0.27472	-0.657733	-0.815769	-0.575496	-0.782051	-0.305049	-0.376717	-1.12429	-0.119116	-0.697043	-0.478054	-0.484385	-0.428079	-0.117783	-0.451934	-0.541149	-0.112845	-0.470746	-0.69573	-0.441765	0.309033	-0.4726	0.206329	-0.723684	-0.240933	-0.0862803	-0.646198	-0.83587	0.356497	-0.812497	-0.0174422	-0.10432	0.112708	-0.734412	-0.299571	0.609714	-0.168723	0.454198	0.25218	-0.215194	0.573416	0.480256	-0.0307609	0.564782	0.59745
-4.76505	0.0997441	-1.4929	-0.748595	-0.970781	-0.275907	-0.657658	-0.817731	-0.574882	-0.783753	-0.306297	-0.376432	-1.12487	-0.117619	-0.69595	-0.479536	-0.484325	-0.428453	-0.11807	-0.45165	-0.542574	-0.113227	-0.471151	-0.695555	-0.442341	0.308259	-0.473586	0.206738	-0.723206	-0.240801	-0.0869338	-0.645571	-0.835919	0.356406	-0.811184	-0.0169896	-0.104268	0.114693	-0.734282	-0.300175	0.609957	-0.169644	0.454674	0.25444	-0.215233	0.572979	0.481745	-0.0296595	0.563352	0.599317
-4.76407	0.0992222	-1.49259	-0.748692	-0.970828	-0.27708	-0.657561	-0.81968	-0.574264	-0.785438	-0.307534	-0.376132	-1.12544	-0.116115	-0.694861	-0.481013	-0.484251	-0.428814	-0.118351	-0.451358	-0.543984	-0.113605	-0.471548	-0.69537	-0.442902	0.307505	-0.474561	0.207155	-0.722716	-0.240664	-0.0875824	-0.644928	-0.835977	0.356312	-0.809857	-0.0165361	-0.104217	0.116668	-0.734154	-0.30078	0.610172	-0.170568	0.455135	0.256698	-0.215276	0.572539	0.483226	-0.0285712	0.561919	0.601173
-4.76309	0.0986988	-1.49227	-0.748771	-0.970857	-0.278238	-0.657442	-0.821616	-0.573641	-0.787106	-0.308759	-0.375817	-1.12599	-0.114606	-0.693776	-0.482487	-0.484164	-0.429162	-0.118628	-0.451057	-0.545378	-0.113981	-0.471936	-0.695174	-0.443448	0.30677	-0.475526	0.20758	-0.722213	-0.240521	-0.0882262	-0.64427	-0.836044	0.356215	-0.808518	-0.0160819	-0.104168	0.118636	-0.734028	-0.301385	0.610362	-0.171497	0.455581	0.258953	-0.215322	0.572097	0.484697	-0.027496	0.560483	0.603019
-4.7621	0.0981737	-1.49193	-0.748831	-0.970867	-0.27938	-0.657299	-0.82354	-0.573013	-0.788758	-0.309973	-0.375488	-1.12654	-0.113091	-0.692694	-0.483956	-0.484064	-0.429497	-0.118899	-0.450748	-0.546755	-0.114352	-0.472315	-0.694969	-0.44398	0.306054	-0.47648	0.208012	-0.721697	-0.240373	-0.0888651	-0.643596	-0.83612	0.356115	-0.807165	-0.0156269	-0.10412	0.120594	-0.733905	-0.30199	0.610524	-0.172431	0.456013	0.261206	-0.215373	0.571652	0.486159	-0.0264341	0.559044	0.604854
-4.76112	0.0976469	-1.49159	-0.748874	-0.970859	-0.280508	-0.657135	-0.82545	-0.57238	-0.790393	-0.311176	-0.375143	-1.12707	-0.11157	-0.691617	-0.485422	-0.483951	-0.42982	-0.119165	-0.45043	-0.548116	-0.114721	-0.472685	-0.694753	-0.444496	0.305357	-0.477424	0.208452	-0.721168	-0.240219	-0.0894992	-0.642906	-0.836206	0.356012	-0.8058	-0.0151712	-0.104074	0.122544	-0.733784	-0.302595	0.61066	-0.173368	0.456431	0.263455	-0.215427	0.571204	0.487612	-0.0253856	0.557602	0.606678
-4.76014	0.0971183	-1.49123	-0.748899	-0.970833	-0.28162	-0.656947	-0.827348	-0.571743	-0.79201	-0.312368	-0.374784	-1.12759	-0.110044	-0.690543	-0.486883	-0.483824	-0.430129	-0.119425	-0.450103	-0.549461	-0.115086	-0.473047	-0.694527	-0.444998	0.30468	-0.478357	0.208899	-0.720626	-0.240059	-0.0901285	-0.642199	-0.8363	0.355906	-0.804422	-0.0147148	-0.104028	0.124485	-0.733666	-0.3032	0.610769	-0.174309	0.456834	0.265702	-0.215485	0.570754	0.489055	-0.0243508	0.556157	0.60849
-4.75916	0.0965879	-1.49086	-0.748906	-0.970789	-0.282717	-0.656737	-0.829233	-0.571102	-0.793611	-0.313548	-0.37441	-1.1281	-0.108513	-0.689473	-0.488339	-0.483685	-0.430426	-0.11968	-0.449768	-0.550788	-0.115447	-0.4734	-0.694291	-0.445484	0.304021	-0.479279	0.209355	-0.720072	-0.239894	-0.090753	-0.641477	-0.836402	0.355797	-0.803031	-0.0142579	-0.103985	0.126417	-0.73355	-0.303805	0.610851	-0.175254	0.457222	0.267946	-0.215546	0.570301	0.49049	-0.0233297	0.554709	0.610291
-4.75817	0.0960557	-1.49048	-0.748895	-0.970726	-0.283798	-0.656504	-0.831105	-0.570456	-0.795194	-0.314716	-0.374021	-1.1286	-0.106977	-0.688408	-0.489791	-0.483534	-0.43071	-0.11993	-0.449425	-0.5521	-0.115806	-0.473744	-0.694045	-0.445956	0.303382	-0.480191	0.209818	-0.719505	-0.239723	-0.0913729	-0.640739	-0.836513	0.355685	-0.801628	-0.0138004	-0.103943	0.12834	-0.733437	-0.304408	0.610907	-0.176203	0.457596	0.270187	-0.215612	0.569845	0.491915	-0.0223225	0.553258	0.612081
-4.75719	0.0955215	-1.49009	-0.748867	-0.970645	-0.284865	-0.656248	-0.832964	-0.569807	-0.796759	-0.315873	-0.373618	-1.12908	-0.105437	-0.687348	-0.491238	-0.48337	-0.430982	-0.120174	-0.449073	-0.553395	-0.116161	-0.474081	-0.693789	-0.446413	0.302761	-0.481093	0.210289	-0.718925	-0.239546	-0.091988	-0.639985	-0.836632	0.35557	-0.800213	-0.0133424	-0.103903	0.130254	-0.733326	-0.305012	0.610937	-0.177155	0.457956	0.272425	-0.215681	0.569387	0.493331	-0.0213294	0.551805	0.613859
-4.75621	0.0949855	-1.48968	-0.748821	-0.970546	-0.285916	-0.655969	-0.834809	-0.569153	-0.798307	-0.317019	-0.373201	-1.12956	-0.103892	-0.686292	-0.492681	-0.483193	-0.431241	-0.120413	-0.448713	-0.554673	-0.116513	-0.474408	-0.693523	-0.446854	0.302159	-0.481984	0.210768	-0.718333	-0.239364	-0.0925985	-0.639214	-0.83676	0.355451	-0.798786	-0.0128839	-0.103864	0.132159	-0.733219	-0.305614	0.61094	-0.178111	0.458301	0.274659	-0.215754	0.568925	0.494738	-0.0203505	0.550348	0.615625
-4.75522	0.0944474	-1.48927	-0.748758	-0.970429	-0.286951	-0.655666	-0.836641	-0.568495	-0.799838	-0.318154	-0.372769	-1.13002	-0.102343	-0.68524	-0.494118	-0.483005	-0.431488	-0.120647	-0.448344	-0.555934	-0.116861	-0.474727	-0.693247	-0.447281	0.301577	-0.482864	0.211254	-0.717729	-0.239175	-0.0932044	-0.638428	-0.836896	0.355329	-0.797346	-0.0124251	-0.103827	0.134056	-0.733115	-0.306215	0.610917	-0.17907	0.458632	0.27689	-0.215831	0.56846	0.496136	-0.019386	0.548889	0.617379
-4.75424	0.0939072	-1.48884	-0.748678	-0.970294	-0.287971	-0.655341	-0.838459	-0.567833	-0.80135	-0.319277	-0.372324	-1.13047	-0.10079	-0.684194	-0.495551	-0.482804	-0.431722	-0.120875	-0.447967	-0.557178	-0.117206	-0.475038	-0.692962	-0.447693	0.301013	-0.483734	0.211749	-0.717112	-0.238982	-0.0938056	-0.637625	-0.83704	0.355205	-0.795894	-0.0119659	-0.103791	0.135942	-0.733013	-0.306816	0.610867	-0.180033	0.458949	0.279117	-0.215912	0.567993	0.497524	-0.018436	0.547427	0.619121
-4.75326	0.093365	-1.4884	-0.74858	-0.970141	-0.288976	-0.654992	-0.840263	-0.567167	-0.802845	-0.320389	-0.371864	-1.1309	-0.0992329	-0.683153	-0.496979	-0.482592	-0.431945	-0.121097	-0.447582	-0.558406	-0.117548	-0.475341	-0.692667	-0.44809	0.300467	-0.484593	0.212252	-0.716483	-0.238782	-0.0944024	-0.636806	-0.837191	0.355076	-0.794431	-0.0115064	-0.103757	0.13782	-0.732915	-0.307415	0.610791	-0.180999	0.459251	0.28134	-0.215996	0.567522	0.498902	-0.0175007	0.545962	0.620852
-4.75227	0.0928206	-1.48795	-0.748466	-0.969971	-0.289965	-0.65462	-0.842054	-0.566498	-0.804321	-0.321489	-0.371391	-1.13133	-0.0976723	-0.682117	-0.498401	-0.482368	-0.432155	-0.121314	-0.447189	-0.559617	-0.117887	-0.475635	-0.692362	-0.448472	0.299941	-0.485442	0.212763	-0.715841	-0.238577	-0.0949946	-0.63597	-0.837351	0.354945	-0.792956	-0.0110466	-0.103725	0.139688	-0.732821	-0.308012	0.610689	-0.181967	0.459539	0.283559	-0.216085	0.567048	0.500272	-0.0165801	0.544494	0.622569
-4.75129	0.092274	-1.48749	-0.748334	-0.969783	-0.290938	-0.654225	-0.843831	-0.565825	-0.805779	-0.322578	-0.370903	-1.13174	-0.0961083	-0.681086	-0.499818	-0.482132	-0.432354	-0.121525	-0.446788	-0.56081	-0.118223	-0.475921	-0.692048	-0.44884	0.299433	-0.48628	0.213282	-0.715187	-0.238366	-0.0955823	-0.635119	-0.837517	0.35481	-0.791469	-0.0105866	-0.103695	0.141547	-0.732729	-0.308608	0.610561	-0.182939	0.459812	0.285774	-0.216177	0.566571	0.501631	-0.0156746	0.543023	0.624275
-4.75031	0.0917251	-1.48702	-0.748185	-0.969577	-0.291896	-0.653806	-0.845593	-0.565149	-0.807219	-0.323656	-0.370402	-1.13214	-0.0945411	-0.680061	-0.50123	-0.481885	-0.43254	-0.121731	-0.446379	-0.561987	-0.118555	-0.4762	-0.691725	-0.449192	0.298943	-0.487108	0.21381	-0.714521	-0.238149	-0.0961656	-0.63425	-0.837692	0.354671	-0.789971	-0.0101265	-0.103666	0.143397	-0.732641	-0.309203	0.610407	-0.183914	0.460071	0.287986	-0.216273	0.566091	0.502982	-0.0147841	0.54155	0.625967
-4.74932	0.091174	-1.48654	-0.748019	-0.969354	-0.292838	-0.653364	-0.847342	-0.564469	-0.80864	-0.324722	-0.369887	-1.13253	-0.0929708	-0.679042	-0.502636	-0.481626	-0.432714	-0.121931	-0.445961	-0.563146	-0.118884	-0.47647	-0.691392	-0.44953	0.298473	-0.487925	0.214345	-0.713843	-0.237926	-0.0967445	-0.633366	-0.837874	0.354529	-0.788461	-0.0096663	-0.10364	0.145237	-0.732557	-0.309795	0.610227	-0.184891	0.460316	0.290192	-0.216373	0.565607	0.504323	-0.0139088	0.540074	0.627648
-4.74834	0.0906206	-1.48605	-0.747837	-0.969113	-0.293765	-0.652899	-0.849077	-0.563786	-0.810043	-0.325777	-0.369359	-1.13291	-0.0913978	-0.678028	-0.504037	-0.481357	-0.432877	-0.122126	-0.445536	-0.564289	-0.11921	-0.476732	-0.69105	-0.449852	0.29802	-0.488732	0.214889	-0.713153	-0.237697	-0.097319	-0.632465	-0.838063	0.354384	-0.78694	-0.00920604	-0.103615	0.147067	-0.732476	-0.310386	0.610021	-0.185871	0.460547	0.292395	-0.216477	0.56512	0.505654	-0.013049	0.538595	0.629315
-4.74736	0.0900648	-1.48555	-0.747638	-0.968855	-0.294676	-0.65241	-0.850797	-0.5631	-0.811427	-0.32682	-0.368818	-1.13328	-0.0898222	-0.67702	-0.505432	-0.481076	-0.433029	-0.122315	-0.445103	-0.565414	-0.119533	-0.476986	-0.690699	-0.45016	0.297586	-0.489528	0.215441	-0.712451	-0.237463	-0.0978892	-0.631547	-0.838259	0.354235	-0.785409	-0.00874581	-0.103592	0.148888	-0.7324	-0.310974	0.60979	-0.186854	0.460763	0.294593	-0.216584	0.564629	0.506976	-0.0122046	0.537114	0.630969
-4.74638	0.0895065	-1.48503	-0.747423	-0.96858	-0.295571	-0.651897	-0.852503	-0.562411	-0.812793	-0.327852	-0.368263	-1.13364	-0.0882442	-0.676019	-0.506821	-0.480785	-0.433168	-0.122498	-0.444663	-0.566522	-0.119853	-0.477232	-0.69034	-0.450454	0.29717	-0.490314	0.216001	-0.711737	-0.237223	-0.0984552	-0.630613	-0.838462	0.354082	-0.783866	-0.00828564	-0.103571	0.1507	-0.732327	-0.311561	0.609532	-0.187839	0.460966	0.296786	-0.216696	0.564135	0.508288	-0.0113759	0.535629	0.632611
-4.74539	0.0889458	-1.48451	-0.747191	-0.968287	-0.296451	-0.65136	-0.854195	-0.561719	-0.814139	-0.328873	-0.367695	-1.13398	-0.086664	-0.675024	-0.508205	-0.480483	-0.433297	-0.122676	-0.444214	-0.567612	-0.12017	-0.477471	-0.689971	-0.450732	0.296773	-0.491089	0.21657	-0.711011	-0.236977	-0.0990169	-0.629663	-0.838672	0.353926	-0.782312	-0.00782559	-0.103551	0.152502	-0.732258	-0.312144	0.609249	-0.188826	0.461154	0.298974	-0.216811	0.563638	0.50959	-0.010563	0.534143	0.634239
-4.74441	0.0883826	-1.48398	-0.746942	-0.967977	-0.297315	-0.6508	-0.855872	-0.561024	-0.815467	-0.329883	-0.367115	-1.13431	-0.0850819	-0.674035	-0.509582	-0.480171	-0.433414	-0.122847	-0.443758	-0.568685	-0.120484	-0.477702	-0.689593	-0.450996	0.296394	-0.491855	0.217148	-0.710274	-0.236725	-0.0995744	-0.628696	-0.838888	0.353766	-0.780748	-0.00736572	-0.103534	0.154294	-0.732193	-0.312725	0.608941	-0.189816	0.461328	0.301157	-0.216931	0.563137	0.510883	-0.00976594	0.532653	0.635854
-4.74343	0.0878169	-1.48344	-0.746678	-0.967651	-0.298163	-0.650217	-0.857534	-0.560326	-0.816775	-0.330881	-0.366521	-1.13463	-0.083498	-0.673052	-0.510953	-0.479849	-0.43352	-0.123013	-0.443294	-0.569741	-0.120795	-0.477925	-0.689207	-0.451245	0.296032	-0.49261	0.217733	-0.709524	-0.236467	-0.100128	-0.627712	-0.839112	0.353602	-0.779173	-0.00690609	-0.103519	0.156076	-0.732132	-0.313304	0.608607	-0.190807	0.461488	0.303336	-0.217054	0.562633	0.512166	-0.00898498	0.531161	0.637455
-4.74244	0.0872485	-1.48288	-0.746397	-0.967307	-0.298995	-0.649609	-0.859182	-0.559626	-0.818065	-0.331868	-0.365915	-1.13494	-0.0819126	-0.672076	-0.512319	-0.479516	-0.433614	-0.123174	-0.442823	-0.57078	-0.121102	-0.478141	-0.688811	-0.451479	0.295689	-0.493354	0.218328	-0.708763	-0.236203	-0.100677	-0.626712	-0.839341	0.353435	-0.777588	-0.00644675	-0.103506	0.157848	-0.732075	-0.31388	0.608248	-0.1918	0.461634	0.305509	-0.217181	0.562124	0.51344	-0.00822019	0.529667	0.639044
-4.74146	0.0866776	-1.48232	-0.746101	-0.966947	-0.299812	-0.648978	-0.860815	-0.558923	-0.819335	-0.332843	-0.365296	-1.13524	-0.0803259	-0.671107	-0.513677	-0.479174	-0.433698	-0.123328	-0.442345	-0.571801	-0.121407	-0.478349	-0.688408	-0.451699	0.295363	-0.494088	0.21893	-0.707991	-0.235934	-0.101222	-0.625696	-0.839577	0.353264	-0.775993	-0.00598776	-0.103494	0.159611	-0.732023	-0.314452	0.607864	-0.192796	0.461766	0.307677	-0.217312	0.561613	0.514704	-0.0074717	0.528169	0.640618
-4.74048	0.0861039	-1.48175	-0.745788	-0.96657	-0.300613	-0.648323	-0.862434	-0.558218	-0.820586	-0.333808	-0.364665	-1.13553	-0.0787381	-0.670145	-0.51503	-0.478821	-0.433771	-0.123477	-0.441859	-0.572805	-0.121709	-0.47855	-0.687996	-0.451905	0.295056	-0.494812	0.219542	-0.707207	-0.235658	-0.101764	-0.624662	-0.839819	0.353089	-0.774388	-0.00552917	-0.103485	0.161364	-0.731975	-0.315022	0.607455	-0.193793	0.461885	0.309839	-0.217447	0.561097	0.515958	-0.00673965	0.52667	0.642179
-4.73949	0.0855275	-1.48117	-0.74546	-0.966176	-0.301398	-0.647644	-0.864038	-0.557511	-0.821817	-0.334761	-0.364021	-1.1358	-0.0771493	-0.669189	-0.516376	-0.478459	-0.433833	-0.12362	-0.441366	-0.573791	-0.122007	-0.478744	-0.687576	-0.452095	0.294766	-0.495526	0.220162	-0.706412	-0.235377	-0.102301	-0.623612	-0.840067	0.35291	-0.772772	-0.00507105	-0.103478	0.163107	-0.731931	-0.315588	0.607021	-0.194791	0.461989	0.311996	-0.217586	0.560578	0.517202	-0.00602414	0.525167	0.643726
-4.73851	0.0849484	-1.48058	-0.745116	-0.965766	-0.302168	-0.646941	-0.865626	-0.556801	-0.823029	-0.335703	-0.363365	-1.13607	-0.0755599	-0.668241	-0.517716	-0.478088	-0.433884	-0.123757	-0.440865	-0.574759	-0.122303	-0.47893	-0.687147	-0.452272	0.294493	-0.49623	0.220791	-0.705605	-0.23509	-0.102834	-0.622546	-0.840321	0.352727	-0.771147	-0.00461346	-0.103473	0.16484	-0.731892	-0.316151	0.606562	-0.195791	0.46208	0.314147	-0.217729	0.560055	0.518437	-0.00532531	0.523663	0.645259
-4.73753	0.0843665	-1.47998	-0.744756	-0.965339	-0.302922	-0.646215	-0.8672	-0.55609	-0.824221	-0.336634	-0.362697	-1.13632	-0.07397	-0.6673	-0.519049	-0.477707	-0.433925	-0.123889	-0.440358	-0.57571	-0.122596	-0.479109	-0.686711	-0.452434	0.294238	-0.496924	0.221428	-0.704788	-0.234796	-0.103364	-0.621462	-0.840581	0.352541	-0.769512	-0.00415645	-0.10347	0.166563	-0.731858	-0.31671	0.606078	-0.196792	0.462157	0.316292	-0.217876	0.559528	0.519661	-0.00464327	0.522155	0.646778
-4.73655	0.0837817	-1.47937	-0.744381	-0.964896	-0.30366	-0.645464	-0.868759	-0.555376	-0.825394	-0.337554	-0.362018	-1.13656	-0.0723798	-0.666367	-0.520375	-0.477318	-0.433955	-0.124014	-0.439843	-0.576644	-0.122887	-0.479282	-0.686266	-0.452581	0.294001	-0.497607	0.222074	-0.703959	-0.234497	-0.103889	-0.620362	-0.840847	0.35235	-0.767868	-0.00370007	-0.103469	0.168275	-0.731828	-0.317265	0.60557	-0.197795	0.46222	0.318431	-0.218027	0.558997	0.520876	-0.00397815	0.520646	0.648283
-4.73556	0.0831941	-1.47875	-0.743991	-0.964437	-0.304382	-0.64469	-0.870303	-0.554661	-0.826547	-0.338463	-0.361327	-1.13679	-0.0707896	-0.665441	-0.521694	-0.476919	-0.433975	-0.124134	-0.439322	-0.57756	-0.123174	-0.479447	-0.685814	-0.452714	0.29378	-0.498281	0.222729	-0.703119	-0.234192	-0.104411	-0.619246	-0.841118	0.352156	-0.766214	-0.0032444	-0.103471	0.169978	-0.731804	-0.317817	0.605037	-0.198798	0.46227	0.320564	-0.218182	0.558462	0.522081	-0.00333006	0.519134	0.649774
-4.73458	0.0826036	-1.47813	-0.743585	-0.963962	-0.305088	-0.643892	-0.871831	-0.553944	-0.82768	-0.33936	-0.360624	-1.13701	-0.0691995	-0.664522	-0.523007	-0.476512	-0.433985	-0.124248	-0.438793	-0.578458	-0.123458	-0.479605	-0.685353	-0.452833	0.293577	-0.498944	0.223393	-0.702268	-0.233881	-0.10493	-0.618113	-0.841394	0.351957	-0.764552	-0.0027895	-0.103474	0.171671	-0.731784	-0.318365	0.60448	-0.199803	0.462306	0.322691	-0.218341	0.557923	0.523277	-0.00269911	0.517619	0.651251
-4.7336	0.0820101	-1.47749	-0.743164	-0.96347	-0.305779	-0.64307	-0.873345	-0.553226	-0.828793	-0.340247	-0.359909	-1.13722	-0.0676098	-0.663611	-0.524312	-0.476096	-0.433985	-0.124356	-0.438258	-0.579338	-0.12374	-0.479756	-0.684885	-0.452938	0.293391	-0.499597	0.224065	-0.701406	-0.233563	-0.105444	-0.616963	-0.841676	0.351755	-0.76288	-0.00233541	-0.10348	0.173353	-0.731769	-0.318908	0.603899	-0.200808	0.462329	0.324812	-0.218505	0.55738	0.524462	-0.00208541	0.516102	0.652713
-4.73261	0.0814137	-1.47685	-0.742728	-0.962963	-0.306454	-0.642224	-0.874843	-0.552506	-0.829886	-0.341122	-0.359184	-1.13742	-0.0660207	-0.662709	-0.525611	-0.475672	-0.433975	-0.124458	-0.437716	-0.580201	-0.124019	-0.479901	-0.68441	-0.453029	0.293222	-0.500241	0.224747	-0.700533	-0.23324	-0.105955	-0.615796	-0.841962	0.351548	-0.761199	-0.00188221	-0.103488	0.175026	-0.731759	-0.319447	0.603293	-0.201814	0.462338	0.326926	-0.218672	0.556834	0.525637	-0.00148908	0.514583	0.654161
-4.73163	0.0808142	-1.4762	-0.742278	-0.962439	-0.307114	-0.641354	-0.876326	-0.551785	-0.830959	-0.341987	-0.358447	-1.13761	-0.0644324	-0.661814	-0.526902	-0.475239	-0.433955	-0.124554	-0.437168	-0.581046	-0.124296	-0.480039	-0.683927	-0.453105	0.29307	-0.500874	0.225437	-0.69965	-0.232911	-0.106463	-0.614613	-0.842254	0.351338	-0.759509	-0.00142995	-0.103499	0.176688	-0.731754	-0.319982	0.602664	-0.202821	0.462334	0.329034	-0.218843	0.556283	0.526803	-0.000910231	0.513062	0.655594
-4.73065	0.0802117	-1.47554	-0.741812	-0.9619	-0.307757	-0.64046	-0.877793	-0.551062	-0.832012	-0.342841	-0.357699	-1.13778	-0.0628451	-0.660927	-0.528186	-0.474799	-0.433925	-0.124644	-0.436613	-0.581874	-0.124569	-0.480171	-0.683437	-0.453168	0.292935	-0.501498	0.226136	-0.698756	-0.232576	-0.106967	-0.613413	-0.842551	0.351123	-0.757811	-0.000978695	-0.103511	0.17834	-0.731754	-0.320512	0.602011	-0.203828	0.462317	0.331135	-0.219018	0.555728	0.527958	-0.00034896	0.511538	0.657013
-4.72966	0.0796061	-1.47487	-0.741332	-0.961345	-0.308385	-0.639543	-0.879246	-0.550339	-0.833044	-0.343684	-0.356941	-1.13795	-0.061259	-0.660048	-0.529462	-0.47435	-0.433885	-0.124728	-0.436051	-0.582683	-0.12484	-0.480296	-0.68294	-0.453216	0.292816	-0.502112	0.226844	-0.697851	-0.232235	-0.107467	-0.612197	-0.842852	0.350904	-0.756105	-0.00052851	-0.103526	0.179982	-0.731759	-0.321038	0.601335	-0.204835	0.462286	0.333229	-0.219198	0.555169	0.529104	0.000194625	0.510012	0.658417
-4.72868	0.0789974	-1.47419	-0.740837	-0.960775	-0.308997	-0.638601	-0.880683	-0.549614	-0.834057	-0.344516	-0.356172	-1.13811	-0.0596743	-0.659177	-0.530731	-0.473894	-0.433836	-0.124807	-0.435484	-0.583475	-0.125109	-0.480415	-0.682436	-0.453251	0.292714	-0.502716	0.227561	-0.696936	-0.231887	-0.107965	-0.610963	-0.843158	0.350681	-0.75439	-7.94556e-05	-0.103543	0.181613	-0.73177	-0.321559	0.600635	-0.205843	0.462243	0.335316	-0.219381	0.554606	0.530239	0.000720421	0.508484	0.659806
-4.7277	0.0783855	-1.47351	-0.740328	-0.960189	-0.309594	-0.637636	-0.882104	-0.548889	-0.835049	-0.345337	-0.355392	-1.13825	-0.0580912	-0.658315	-0.531993	-0.473431	-0.433778	-0.124879	-0.43491	-0.58425	-0.125374	-0.480527	-0.681924	-0.453271	0.292628	-0.503311	0.228287	-0.69601	-0.231534	-0.108458	-0.609714	-0.843468	0.350454	-0.752667	0.000368406	-0.103563	0.183234	-0.731786	-0.322074	0.599912	-0.206851	0.462186	0.337396	-0.219569	0.554038	0.531365	0.00122833	0.506953	0.66118
-4.72671	0.0777705	-1.47282	-0.739805	-0.959588	-0.310175	-0.636647	-0.88351	-0.548163	-0.836021	-0.346147	-0.354602	-1.13839	-0.05651	-0.657462	-0.533247	-0.47296	-0.43371	-0.124946	-0.43433	-0.585006	-0.125638	-0.480634	-0.681406	-0.453278	0.292559	-0.503896	0.229023	-0.695075	-0.231174	-0.108949	-0.608447	-0.843782	0.350222	-0.750936	0.000815012	-0.103584	0.184845	-0.731808	-0.322585	0.599165	-0.207859	0.462117	0.339469	-0.219761	0.553467	0.53248	0.00171825	0.505421	0.66254
-4.72573	0.0771523	-1.47212	-0.739268	-0.958972	-0.31074	-0.635634	-0.884901	-0.547436	-0.836972	-0.346947	-0.353802	-1.13851	-0.0549308	-0.656617	-0.534493	-0.472482	-0.433634	-0.125007	-0.433743	-0.585745	-0.125898	-0.480734	-0.680882	-0.453272	0.292505	-0.504471	0.229767	-0.694129	-0.230809	-0.109436	-0.607164	-0.844101	0.349987	-0.749197	0.0012603	-0.103609	0.186446	-0.731835	-0.32309	0.598396	-0.208866	0.462035	0.341535	-0.219956	0.552891	0.533586	0.00219008	0.503886	0.663884
-4.72475	0.0765308	-1.47141	-0.738716	-0.95834	-0.31129	-0.634598	-0.886276	-0.546709	-0.837903	-0.347736	-0.352992	-1.13862	-0.0533539	-0.65578	-0.535732	-0.471997	-0.433548	-0.125061	-0.433151	-0.586466	-0.126157	-0.480828	-0.680351	-0.453251	0.292468	-0.505037	0.23052	-0.693173	-0.230437	-0.109921	-0.605864	-0.844424	0.349747	-0.74745	0.0017042	-0.103635	0.188036	-0.731868	-0.323591	0.597604	-0.209874	0.46194	0.343593	-0.220157	0.552311	0.534681	0.00264374	0.502349	0.665213
-4.72377	0.075906	-1.4707	-0.738151	-0.957694	-0.311824	-0.633537	-0.887635	-0.545982	-0.838814	-0.348515	-0.352173	-1.13873	-0.0517794	-0.654953	-0.536963	-0.471505	-0.433454	-0.12511	-0.432553	-0.587169	-0.126412	-0.480917	-0.679813	-0.453218	0.292446	-0.505593	0.231282	-0.692207	-0.23006	-0.110402	-0.604548	-0.844751	0.349502	-0.745697	0.00214666	-0.103664	0.189616	-0.731906	-0.324085	0.596789	-0.210881	0.461832	0.345643	-0.220361	0.551726	0.535766	0.00307913	0.50081	0.666528
-4.72278	0.075278	-1.46998	-0.737571	-0.957032	-0.312343	-0.632453	-0.888979	-0.545254	-0.839704	-0.349283	-0.351343	-1.13882	-0.0502076	-0.654134	-0.538185	-0.471007	-0.43335	-0.125153	-0.43195	-0.587855	-0.126666	-0.481	-0.679269	-0.45317	0.29244	-0.50614	0.232054	-0.691231	-0.229676	-0.11088	-0.603216	-0.845081	0.349254	-0.743935	0.00258761	-0.103696	0.191185	-0.73195	-0.324574	0.595952	-0.211887	0.461712	0.347686	-0.220569	0.551138	0.536842	0.00349616	0.499269	0.667827
-4.7218	0.0746467	-1.46925	-0.736979	-0.956356	-0.312846	-0.631345	-0.890307	-0.544526	-0.840573	-0.350041	-0.350504	-1.13891	-0.0486387	-0.653324	-0.5394	-0.470503	-0.433238	-0.12519	-0.43134	-0.588522	-0.126917	-0.481077	-0.678719	-0.453109	0.29245	-0.506678	0.232834	-0.690245	-0.229286	-0.111355	-0.601866	-0.845415	0.349001	-0.742167	0.00302699	-0.103729	0.192744	-0.732	-0.325057	0.595092	-0.212893	0.461579	0.349722	-0.220782	0.550545	0.537907	0.00389475	0.497726	0.66911
-4.72082	0.074012	-1.46851	-0.736372	-0.955665	-0.313334	-0.630214	-0.89162	-0.543798	-0.841422	-0.350788	-0.349656	-1.13898	-0.0470729	-0.652523	-0.540607	-0.469992	-0.433118	-0.125221	-0.430725	-0.589172	-0.127165	-0.481148	-0.678163	-0.453035	0.292476	-0.507206	0.233624	-0.68925	-0.22889	-0.111828	-0.6005	-0.845753	0.348744	-0.740391	0.00346472	-0.103766	0.194293	-0.732056	-0.325534	0.59421	-0.213898	0.461434	0.351749	-0.220999	0.549947	0.538962	0.0042748	0.496181	0.670379
-4.71983	0.0733739	-1.46777	-0.735752	-0.954959	-0.313806	-0.629059	-0.892917	-0.543071	-0.84225	-0.351524	-0.348799	-1.13904	-0.0455104	-0.651731	-0.541805	-0.469475	-0.432989	-0.125246	-0.430105	-0.589804	-0.127412	-0.481214	-0.677601	-0.452948	0.292516	-0.507725	0.234423	-0.688245	-0.228488	-0.112297	-0.599118	-0.846094	0.348483	-0.738609	0.00390076	-0.103804	0.195831	-0.732117	-0.326006	0.593306	-0.214902	0.461276	0.353768	-0.22122	0.549346	0.540006	0.00463624	0.494634	0.671632
-4.71885	0.0727325	-1.46702	-0.735119	-0.954239	-0.314263	-0.627881	-0.894199	-0.542343	-0.843057	-0.352251	-0.347933	-1.1391	-0.0439513	-0.650949	-0.542995	-0.468952	-0.432852	-0.125264	-0.429479	-0.590419	-0.127656	-0.481275	-0.677033	-0.452848	0.292572	-0.508235	0.235231	-0.687231	-0.22808	-0.112764	-0.59772	-0.846438	0.348217	-0.73682	0.00433502	-0.103845	0.197359	-0.732185	-0.326471	0.592381	-0.215905	0.461107	0.355779	-0.221446	0.548739	0.541041	0.00497899	0.493085	0.672869
-4.71787	0.0720876	-1.46627	-0.734473	-0.953504	-0.314705	-0.626679	-0.895465	-0.541616	-0.843843	-0.352967	-0.347058	-1.13914	-0.042396	-0.650176	-0.544177	-0.468424	-0.432707	-0.125278	-0.428848	-0.591016	-0.127898	-0.48133	-0.67646	-0.452734	0.292643	-0.508736	0.236048	-0.686207	-0.227666	-0.113228	-0.596304	-0.846786	0.347946	-0.735024	0.00476745	-0.103889	0.198876	-0.732258	-0.326929	0.591434	-0.216907	0.460925	0.357782	-0.221675	0.548129	0.542066	0.00530296	0.491534	0.674092
-4.71688	0.0714393	-1.4655	-0.733813	-0.952756	-0.315131	-0.625453	-0.896715	-0.54089	-0.844609	-0.353673	-0.346174	-1.13918	-0.0408446	-0.649412	-0.54535	-0.46789	-0.432554	-0.125285	-0.428212	-0.591594	-0.128137	-0.48138	-0.675881	-0.452608	0.292729	-0.509227	0.236875	-0.685174	-0.227245	-0.113689	-0.594873	-0.847136	0.347672	-0.733223	0.00519798	-0.103935	0.200382	-0.732338	-0.327382	0.590465	-0.217907	0.460731	0.359777	-0.221909	0.547514	0.54308	0.00560808	0.489982	0.675298
-4.7159	0.0707876	-1.46474	-0.733141	-0.951993	-0.315542	-0.624205	-0.89795	-0.540164	-0.845354	-0.354368	-0.345282	-1.1392	-0.0392972	-0.648658	-0.546515	-0.467351	-0.432393	-0.125286	-0.427571	-0.592156	-0.128375	-0.481425	-0.675297	-0.452468	0.29283	-0.50971	0.23771	-0.684132	-0.226819	-0.114148	-0.593425	-0.847489	0.347393	-0.731414	0.00562655	-0.103984	0.201879	-0.732424	-0.327828	0.589476	-0.218906	0.460525	0.361763	-0.222148	0.546894	0.544084	0.00589428	0.488427	0.676489
-4.71492	0.0701324	-1.46396	-0.732456	-0.951215	-0.315937	-0.622933	-0.899168	-0.539439	-0.846078	-0.355054	-0.344382	-1.13922	-0.0377542	-0.647913	-0.547672	-0.466807	-0.432225	-0.125281	-0.426925	-0.592699	-0.12861	-0.481465	-0.674708	-0.452316	0.292945	-0.510184	0.238555	-0.68308	-0.226386	-0.114604	-0.591961	-0.847845	0.347109	-0.7296	0.00605309	-0.104035	0.203365	-0.732515	-0.328267	0.588465	-0.219904	0.460308	0.36374	-0.22239	0.54627	0.545078	0.00616148	0.486871	0.677664
-4.71394	0.0694736	-1.46318	-0.731758	-0.950424	-0.316318	-0.621637	-0.900372	-0.538715	-0.846781	-0.35573	-0.343474	-1.13922	-0.0362157	-0.647178	-0.548819	-0.466258	-0.432049	-0.12527	-0.426275	-0.593225	-0.128843	-0.481501	-0.674114	-0.452151	0.293075	-0.510648	0.239409	-0.68202	-0.225947	-0.115057	-0.59048	-0.848204	0.346821	-0.72778	0.00647753	-0.104088	0.20484	-0.732614	-0.328699	0.587434	-0.2209	0.460079	0.365709	-0.222637	0.545642	0.546061	0.00640962	0.485313	0.678824
-4.71295	0.0688114	-1.4624	-0.731048	-0.94962	-0.316683	-0.620319	-0.901559	-0.537991	-0.847463	-0.356395	-0.342558	-1.13922	-0.0346819	-0.646452	-0.549958	-0.465704	-0.431865	-0.125254	-0.425619	-0.593733	-0.129074	-0.481531	-0.673514	-0.451974	0.293219	-0.511104	0.240273	-0.680951	-0.225502	-0.115509	-0.588984	-0.848565	0.346529	-0.725955	0.00689981	-0.104145	0.206305	-0.732718	-0.329124	0.586382	-0.221894	0.459838	0.367669	-0.222889	0.545009	0.547035	0.00663863	0.483753	0.679968
-4.71197	0.0681457	-1.46161	-0.730325	-0.948801	-0.317033	-0.618977	-0.902731	-0.537269	-0.848124	-0.357051	-0.341635	-1.13921	-0.033153	-0.645736	-0.551088	-0.465146	-0.431674	-0.125231	-0.424959	-0.594224	-0.129303	-0.481558	-0.672911	-0.451784	0.293377	-0.511552	0.241146	-0.679873	-0.225051	-0.115957	-0.587471	-0.848928	0.346232	-0.724123	0.00731987	-0.104203	0.207759	-0.732829	-0.329543	0.585309	-0.222886	0.459586	0.36962	-0.223144	0.544371	0.547998	0.00684845	0.482192	0.681096
-4.71099	0.0674764	-1.46081	-0.72959	-0.947969	-0.317369	-0.617612	-0.903887	-0.536548	-0.848764	-0.357697	-0.340704	-1.13918	-0.0316292	-0.64503	-0.55221	-0.464583	-0.431476	-0.125202	-0.424295	-0.594697	-0.12953	-0.481579	-0.672302	-0.451582	0.29355	-0.51199	0.242028	-0.678786	-0.224593	-0.116404	-0.585942	-0.849294	0.345931	-0.722287	0.00773762	-0.104265	0.209203	-0.732946	-0.329954	0.584216	-0.223876	0.459322	0.371562	-0.223404	0.543729	0.548951	0.007039	0.480629	0.682209
-4.71	0.0668035	-1.46001	-0.728843	-0.947123	-0.317689	-0.616225	-0.905028	-0.535829	-0.849384	-0.358333	-0.339765	-1.13915	-0.0301107	-0.644334	-0.553322	-0.464017	-0.431271	-0.125168	-0.423626	-0.595152	-0.129756	-0.481596	-0.671689	-0.451367	0.293736	-0.51242	0.242919	-0.677691	-0.22413	-0.116848	-0.584397	-0.849662	0.345625	-0.720445	0.00815302	-0.104328	0.210636	-0.733069	-0.330358	0.583103	-0.224864	0.459047	0.373495	-0.223669	0.543083	0.549894	0.00721025	0.479064	0.683305
-4.70902	0.0661271	-1.4592	-0.728084	-0.946264	-0.317994	-0.614814	-0.906153	-0.535111	-0.849982	-0.35896	-0.33882	-1.13911	-0.0285977	-0.643648	-0.554425	-0.463446	-0.43106	-0.125128	-0.422953	-0.59559	-0.129979	-0.481609	-0.671072	-0.451141	0.293936	-0.512842	0.243819	-0.676588	-0.22366	-0.117291	-0.582835	-0.850031	0.345315	-0.718598	0.008566	-0.104395	0.212059	-0.733199	-0.330755	0.581971	-0.22585	0.458761	0.375419	-0.223938	0.542432	0.550826	0.00736211	0.477498	0.684386
-4.70804	0.0654471	-1.45839	-0.727313	-0.945392	-0.318284	-0.613381	-0.907262	-0.534395	-0.850559	-0.359576	-0.337868	-1.13907	-0.0270904	-0.642972	-0.55552	-0.462871	-0.430841	-0.125081	-0.422276	-0.59601	-0.1302	-0.481618	-0.67045	-0.450902	0.294149	-0.513255	0.244729	-0.675476	-0.223185	-0.117731	-0.581258	-0.850403	0.345001	-0.716747	0.00897648	-0.104464	0.213471	-0.733335	-0.331144	0.580819	-0.226833	0.458464	0.377333	-0.224211	0.541776	0.551748	0.00749455	0.47593	0.685451
-4.70705	0.0647635	-1.45758	-0.72653	-0.944506	-0.31856	-0.611925	-0.908356	-0.53368	-0.851116	-0.360183	-0.336909	-1.13901	-0.0255889	-0.642306	-0.556605	-0.462293	-0.430616	-0.125029	-0.421595	-0.596412	-0.13042	-0.481622	-0.669824	-0.450651	0.294376	-0.51366	0.245649	-0.674356	-0.222703	-0.118169	-0.579665	-0.850776	0.344681	-0.71489	0.0093844	-0.104535	0.214873	-0.733478	-0.331525	0.579647	-0.227814	0.458156	0.379238	-0.224489	0.541116	0.55266	0.00760752	0.47436	0.6865
-4.70607	0.0640763	-1.45676	-0.725736	-0.943607	-0.318821	-0.610446	-0.909434	-0.532967	-0.851651	-0.360781	-0.335943	-1.13894	-0.0240936	-0.64165	-0.557681	-0.461712	-0.430384	-0.124971	-0.42091	-0.596797	-0.130638	-0.481623	-0.669195	-0.450388	0.294617	-0.514056	0.246577	-0.673228	-0.222214	-0.118605	-0.578056	-0.851151	0.344358	-0.71303	0.00978969	-0.104609	0.216264	-0.733628	-0.331899	0.578456	-0.228792	0.457837	0.381133	-0.224772	0.540451	0.553561	0.00770095	0.47279	0.687533
-4.70509	0.0633854	-1.45593	-0.72493	-0.942696	-0.319067	-0.608945	-0.910496	-0.532256	-0.852166	-0.361369	-0.334972	-1.13887	-0.0226045	-0.641004	-0.558747	-0.461127	-0.430146	-0.124907	-0.420221	-0.597165	-0.130854	-0.48162	-0.668562	-0.450114	0.29487	-0.514445	0.247515	-0.672092	-0.22172	-0.119039	-0.576431	-0.851527	0.34403	-0.711164	0.0101923	-0.104686	0.217645	-0.733784	-0.332265	0.577247	-0.229767	0.457507	0.383018	-0.225058	0.539782	0.554452	0.0077748	0.471217	0.688549
-4.7041	0.062691	-1.4551	-0.724113	-0.941772	-0.319298	-0.607421	-0.911543	-0.531548	-0.852659	-0.361948	-0.333994	-1.13879	-0.0211219	-0.640368	-0.559805	-0.460539	-0.429902	-0.124837	-0.419529	-0.597515	-0.131068	-0.481613	-0.667925	-0.449827	0.295136	-0.514825	0.248462	-0.670948	-0.22122	-0.119472	-0.57479	-0.851905	0.343697	-0.709295	0.0105921	-0.104765	0.219016	-0.733947	-0.332622	0.576018	-0.230739	0.457167	0.384894	-0.22535	0.539108	0.555333	0.00782903	0.469644	0.68955
-4.70312	0.0619929	-1.45427	-0.723284	-0.940834	-0.319515	-0.605875	-0.912574	-0.530841	-0.853131	-0.362518	-0.33301	-1.1387	-0.0196459	-0.639743	-0.560852	-0.459948	-0.429652	-0.124762	-0.418833	-0.597848	-0.131281	-0.481602	-0.667285	-0.44953	0.295415	-0.515197	0.249418	-0.669797	-0.220713	-0.119902	-0.573134	-0.852284	0.34336	-0.707422	0.0109892	-0.104847	0.220376	-0.734117	-0.332972	0.574771	-0.231708	0.456816	0.38676	-0.225646	0.53843	0.556203	0.0078636	0.468069	0.690535
-4.70214	0.0612912	-1.45343	-0.722444	-0.939885	-0.319717	-0.604307	-0.91359	-0.530137	-0.853583	-0.363078	-0.332021	-1.1386	-0.0181768	-0.639128	-0.561891	-0.459355	-0.429395	-0.12468	-0.418133	-0.598163	-0.131492	-0.481588	-0.666642	-0.449221	0.295707	-0.515561	0.250384	-0.668638	-0.2202	-0.120331	-0.571462	-0.852664	0.343018	-0.705544	0.0113833	-0.104931	0.221725	-0.734293	-0.333314	0.573506	-0.232674	0.456455	0.388616	-0.225946	0.537747	0.557063	0.00787847	0.466492	0.691504
-4.70116	0.0605859	-1.45258	-0.721594	-0.938923	-0.319905	-0.602716	-0.91459	-0.529436	-0.854013	-0.36363	-0.331026	-1.13849	-0.0167146	-0.638523	-0.56292	-0.458759	-0.429134	-0.124593	-0.417431	-0.598461	-0.131702	-0.48157	-0.665995	-0.4489	0.296011	-0.515917	0.251359	-0.667471	-0.219681	-0.120758	-0.569774	-0.853045	0.342672	-0.703664	0.0117744	-0.105018	0.223064	-0.734476	-0.333647	0.572222	-0.233637	0.456084	0.390461	-0.226251	0.537059	0.557913	0.00787359	0.464915	0.692457
-4.70017	0.0598769	-1.45174	-0.720732	-0.937948	-0.320079	-0.601104	-0.915575	-0.528737	-0.854422	-0.364172	-0.330026	-1.13837	-0.0152597	-0.637928	-0.563939	-0.458161	-0.428866	-0.1245	-0.416725	-0.598742	-0.13191	-0.48155	-0.665346	-0.448569	0.296327	-0.516265	0.252343	-0.666297	-0.219156	-0.121184	-0.568071	-0.853427	0.342322	-0.701779	0.0121626	-0.105107	0.224393	-0.734666	-0.333972	0.570921	-0.234596	0.455703	0.392297	-0.226561	0.536367	0.558752	0.00784895	0.463336	0.693394
-4.69919	0.0591643	-1.45089	-0.71986	-0.936961	-0.320238	-0.59947	-0.916544	-0.528041	-0.854811	-0.364705	-0.32902	-1.13825	-0.0138122	-0.637344	-0.564948	-0.457561	-0.428593	-0.124401	-0.416016	-0.599005	-0.132116	-0.481526	-0.664693	-0.448226	0.296655	-0.516605	0.253337	-0.665116	-0.218625	-0.121608	-0.566352	-0.853809	0.341967	-0.699891	0.0125476	-0.105199	0.225711	-0.734863	-0.334288	0.569603	-0.235552	0.455311	0.394122	-0.226875	0.53567	0.559581	0.00780449	0.461756	0.694315
-4.69821	0.058448	-1.45004	-0.718977	-0.935962	-0.320383	-0.597814	-0.917498	-0.527347	-0.855178	-0.36523	-0.32801	-1.13812	-0.0123722	-0.636771	-0.565948	-0.456959	-0.428314	-0.124296	-0.415305	-0.599252	-0.132321	-0.481499	-0.664038	-0.447872	0.296995	-0.516938	0.25434	-0.663927	-0.218087	-0.122031	-0.564618	-0.854193	0.341607	-0.698001	0.0129295	-0.105294	0.227019	-0.735066	-0.334596	0.568266	-0.236503	0.45491	0.395937	-0.227193	0.534969	0.5604	0.0077402	0.460175	0.695219
-4.69722	0.0577281	-1.44918	-0.718084	-0.934951	-0.320514	-0.596136	-0.918437	-0.526657	-0.855525	-0.365745	-0.326995	-1.13798	-0.01094	-0.636208	-0.566938	-0.456355	-0.428031	-0.124186	-0.41459	-0.599481	-0.132525	-0.481469	-0.663381	-0.447508	0.297347	-0.517263	0.255352	-0.662732	-0.217543	-0.122452	-0.562869	-0.854576	0.341243	-0.696107	0.0133082	-0.105391	0.228316	-0.735277	-0.334895	0.566913	-0.237452	0.4545	0.397741	-0.227517	0.534263	0.561208	0.00765605	0.458593	0.696108
-4.69624	0.0570046	-1.44832	-0.717181	-0.933929	-0.32063	-0.594437	-0.91936	-0.52597	-0.85585	-0.366252	-0.325976	-1.13783	-0.00951576	-0.635656	-0.567918	-0.455749	-0.427742	-0.12407	-0.413873	-0.599693	-0.132727	-0.481436	-0.662721	-0.447132	0.297711	-0.517581	0.256373	-0.661529	-0.216994	-0.122872	-0.561104	-0.85496	0.340875	-0.69421	0.0136835	-0.105491	0.229604	-0.735494	-0.335186	0.565543	-0.238396	0.454079	0.399535	-0.227845	0.533553	0.562005	0.00755201	0.45701	0.69698
-4.69526	0.0562774	-1.44746	-0.716267	-0.932894	-0.320733	-0.592716	-0.920268	-0.525285	-0.856155	-0.36675	-0.324952	-1.13768	-0.00809959	-0.635114	-0.568888	-0.455143	-0.427448	-0.123948	-0.413153	-0.599887	-0.132928	-0.481401	-0.662059	-0.446746	0.298086	-0.517891	0.257404	-0.66032	-0.216438	-0.123291	-0.559325	-0.855345	0.340502	-0.692311	0.0140556	-0.105593	0.23088	-0.735718	-0.335467	0.564156	-0.239336	0.45365	0.401318	-0.228177	0.532838	0.562792	0.00742806	0.455425	0.697837
-4.69427	0.0555466	-1.44659	-0.715343	-0.931848	-0.320822	-0.590974	-0.92116	-0.524605	-0.856438	-0.367239	-0.323925	-1.13752	-0.0066917	-0.634582	-0.569849	-0.454535	-0.42715	-0.12382	-0.412431	-0.600065	-0.133128	-0.481363	-0.661395	-0.44635	0.298472	-0.518194	0.258444	-0.659105	-0.215875	-0.123709	-0.55753	-0.855729	0.340125	-0.690409	0.0144241	-0.105698	0.232147	-0.73595	-0.335739	0.562753	-0.240272	0.45321	0.40309	-0.228515	0.532118	0.563569	0.00728418	0.45384	0.698677
-4.69329	0.0548121	-1.44572	-0.714409	-0.93079	-0.320897	-0.589211	-0.922037	-0.523927	-0.856701	-0.36772	-0.322893	-1.13735	-0.00529228	-0.634062	-0.570799	-0.453926	-0.426847	-0.123687	-0.411707	-0.600226	-0.133326	-0.481323	-0.660729	-0.445943	0.298869	-0.51849	0.259493	-0.657883	-0.215307	-0.124125	-0.55572	-0.856114	0.339743	-0.688505	0.0147892	-0.105806	0.233403	-0.736188	-0.336002	0.561333	-0.241203	0.452762	0.404851	-0.228857	0.531394	0.564336	0.00712037	0.452254	0.699501
-4.69231	0.054074	-1.44485	-0.713466	-0.92972	-0.320958	-0.587427	-0.922899	-0.523254	-0.856943	-0.368193	-0.321858	-1.13717	-0.00390148	-0.633552	-0.571739	-0.453316	-0.426539	-0.123548	-0.410981	-0.60037	-0.133524	-0.48128	-0.660062	-0.445527	0.299277	-0.518778	0.260551	-0.656654	-0.214733	-0.124541	-0.553895	-0.856498	0.339357	-0.686599	0.0151508	-0.105916	0.234649	-0.736433	-0.336256	0.559898	-0.242131	0.452305	0.406601	-0.229203	0.530665	0.565092	0.00693659	0.450667	0.70031
-4.69133	0.0533324	-1.44398	-0.712513	-0.92864	-0.321006	-0.585622	-0.923746	-0.522584	-0.857164	-0.368657	-0.320819	-1.13699	-0.00251949	-0.633052	-0.572669	-0.452705	-0.426227	-0.123403	-0.410252	-0.600497	-0.13372	-0.481235	-0.659392	-0.4451	0.299696	-0.519059	0.261619	-0.655419	-0.214152	-0.124955	-0.552056	-0.856883	0.338966	-0.68469	0.0155087	-0.106029	0.235884	-0.736686	-0.336501	0.558447	-0.243053	0.451838	0.408341	-0.229555	0.529932	0.565837	0.00673285	0.449079	0.701102
-4.69034	0.0525871	-1.4431	-0.71155	-0.927548	-0.321039	-0.583796	-0.924578	-0.521917	-0.857365	-0.369113	-0.319777	-1.1368	-0.00114647	-0.632564	-0.573589	-0.452094	-0.425911	-0.123253	-0.409522	-0.600608	-0.133915	-0.481188	-0.658722	-0.444663	0.300126	-0.519333	0.262696	-0.654178	-0.213565	-0.125369	-0.550201	-0.857267	0.338571	-0.68278	0.0158629	-0.106144	0.23711	-0.736945	-0.336736	0.55698	-0.243971	0.451363	0.410069	-0.229911	0.529195	0.566572	0.00650914	0.44749	0.701878
-4.68936	0.0518382	-1.44222	-0.710578	-0.926445	-0.32106	-0.58195	-0.925394	-0.521255	-0.857544	-0.369561	-0.318732	-1.1366	0.000217409	-0.632085	-0.574498	-0.451483	-0.425591	-0.123097	-0.408789	-0.600701	-0.134109	-0.481138	-0.65805	-0.444216	0.300565	-0.519601	0.263781	-0.652931	-0.212973	-0.125781	-0.548332	-0.857651	0.338172	-0.680869	0.0162134	-0.106261	0.238325	-0.737212	-0.336962	0.555499	-0.244884	0.45088	0.411785	-0.230271	0.528453	0.567297	0.00626544	0.445901	0.702638
-4.68838	0.0510857	-1.44135	-0.709596	-0.925331	-0.321067	-0.580083	-0.926196	-0.520597	-0.857703	-0.370001	-0.317684	-1.1364	0.00157198	-0.631618	-0.575398	-0.450872	-0.425266	-0.122936	-0.408055	-0.600778	-0.134302	-0.481087	-0.657377	-0.443759	0.301015	-0.519861	0.264876	-0.651678	-0.212374	-0.126193	-0.546449	-0.858034	0.337768	-0.678956	0.01656	-0.106382	0.23953	-0.737485	-0.337179	0.554002	-0.245793	0.450388	0.413491	-0.230637	0.527706	0.568011	0.00600176	0.444311	0.703382
-4.68739	0.0503297	-1.44046	-0.708606	-0.924206	-0.321061	-0.578196	-0.926982	-0.519943	-0.857841	-0.370432	-0.316634	-1.13619	0.00291708	-0.631161	-0.576287	-0.450261	-0.424938	-0.122769	-0.40732	-0.600838	-0.134494	-0.481035	-0.656703	-0.443293	0.301475	-0.520115	0.265981	-0.65042	-0.211768	-0.126604	-0.544551	-0.858416	0.33736	-0.677041	0.0169028	-0.106504	0.240725	-0.737766	-0.337385	0.552491	-0.246696	0.449887	0.415185	-0.231007	0.526955	0.568714	0.0057181	0.44272	0.70411
-4.68641	0.0495701	-1.43958	-0.707606	-0.92307	-0.321041	-0.576289	-0.927754	-0.519293	-0.857959	-0.370856	-0.315581	-1.13597	0.00425255	-0.630715	-0.577165	-0.44965	-0.424606	-0.122596	-0.406583	-0.600882	-0.134685	-0.48098	-0.656029	-0.442818	0.301945	-0.520362	0.267094	-0.649156	-0.211157	-0.127014	-0.542638	-0.858798	0.336948	-0.675126	0.0172416	-0.10663	0.24191	-0.738054	-0.337582	0.550965	-0.247594	0.449378	0.416867	-0.231382	0.526199	0.569407	0.00541445	0.441128	0.704822
-4.68543	0.048807	-1.4387	-0.706597	-0.921924	-0.321008	-0.574362	-0.928511	-0.518648	-0.858055	-0.371272	-0.314526	-1.13575	0.00557822	-0.63028	-0.578033	-0.449039	-0.424271	-0.122418	-0.405845	-0.600909	-0.134875	-0.480924	-0.655353	-0.442333	0.302424	-0.520602	0.268216	-0.647886	-0.21054	-0.127424	-0.540711	-0.859179	0.336531	-0.673209	0.0175764	-0.106757	0.243085	-0.738348	-0.337769	0.549425	-0.248487	0.448861	0.418538	-0.231762	0.525439	0.57009	0.00509083	0.439536	0.705518
-4.68444	0.0480403	-1.43781	-0.70558	-0.920767	-0.320963	-0.572415	-0.929253	-0.518007	-0.858132	-0.37168	-0.313469	-1.13552	0.00689394	-0.629856	-0.57889	-0.448429	-0.423932	-0.122235	-0.405106	-0.60092	-0.135064	-0.480867	-0.654678	-0.441839	0.302913	-0.520836	0.269347	-0.646611	-0.209917	-0.127833	-0.53877	-0.859559	0.336111	-0.671292	0.0179072	-0.106887	0.244249	-0.738651	-0.337946	0.547871	-0.249374	0.448336	0.420197	-0.232147	0.524675	0.570762	0.00474725	0.437944	0.706198
-4.68346	0.0472702	-1.43692	-0.704554	-0.9196	-0.320904	-0.570449	-0.92998	-0.51737	-0.858188	-0.37208	-0.31241	-1.13528	0.00819954	-0.629442	-0.579737	-0.44782	-0.42359	-0.122046	-0.404366	-0.600914	-0.135253	-0.480808	-0.654002	-0.441336	0.303411	-0.521063	0.270488	-0.645331	-0.209287	-0.128242	-0.536815	-0.859939	0.335685	-0.669374	0.0182337	-0.10702	0.245404	-0.73896	-0.338114	0.546303	-0.250256	0.447804	0.421844	-0.232536	0.523906	0.571424	0.00438371	0.436351	0.706862
-4.68248	0.0464965	-1.43603	-0.703519	-0.918422	-0.320833	-0.568463	-0.930692	-0.516739	-0.858223	-0.372473	-0.31135	-1.13504	0.00949488	-0.629039	-0.580574	-0.447212	-0.423245	-0.121851	-0.403625	-0.600892	-0.135441	-0.480748	-0.653326	-0.440824	0.303918	-0.521284	0.271637	-0.644046	-0.208652	-0.12865	-0.534846	-0.860317	0.335256	-0.667456	0.0185561	-0.107155	0.246548	-0.739276	-0.338271	0.544722	-0.251132	0.447263	0.423479	-0.232931	0.523133	0.572075	0.00400022	0.434758	0.70751
-4.6815	0.0457194	-1.43514	-0.702476	-0.917234	-0.320748	-0.566458	-0.93139	-0.516112	-0.858238	-0.372859	-0.310288	-1.13479	0.0107798	-0.628646	-0.581399	-0.446605	-0.422897	-0.121651	-0.402883	-0.600854	-0.135628	-0.480687	-0.65265	-0.440303	0.304433	-0.521499	0.272795	-0.642756	-0.20801	-0.129058	-0.532863	-0.860693	0.334823	-0.665537	0.0188742	-0.107293	0.247683	-0.7396	-0.338418	0.543128	-0.252003	0.446715	0.425103	-0.23333	0.522355	0.572715	0.00359681	0.433164	0.708143
-4.68051	0.0449389	-1.43425	-0.701425	-0.916036	-0.320651	-0.564433	-0.932073	-0.51549	-0.858232	-0.373237	-0.309225	-1.13454	0.0120541	-0.628265	-0.582214	-0.445999	-0.422546	-0.121446	-0.402141	-0.600799	-0.135814	-0.480626	-0.651974	-0.439774	0.304958	-0.521708	0.273963	-0.641461	-0.207362	-0.129466	-0.530867	-0.861069	0.334385	-0.663619	0.019188	-0.107433	0.248808	-0.73993	-0.338555	0.541521	-0.252868	0.44616	0.426714	-0.233734	0.521574	0.573345	0.00317349	0.43157	0.708759
-4.67953	0.0441549	-1.43336	-0.700366	-0.914828	-0.320542	-0.56239	-0.932742	-0.514874	-0.858206	-0.373607	-0.308161	-1.13428	0.0133178	-0.627894	-0.583019	-0.445395	-0.422192	-0.121235	-0.401398	-0.600729	-0.136	-0.480563	-0.651298	-0.439236	0.305491	-0.52191	0.275139	-0.640161	-0.206708	-0.129873	-0.528856	-0.861443	0.333943	-0.6617	0.0194973	-0.107575	0.249923	-0.740268	-0.338681	0.539901	-0.253726	0.445598	0.428313	-0.234143	0.520787	0.573965	0.00273029	0.429976	0.70936
-4.67855	0.0433675	-1.43247	-0.699298	-0.913611	-0.32042	-0.560328	-0.933396	-0.514262	-0.85816	-0.373971	-0.307096	-1.13401	0.0145705	-0.627533	-0.583812	-0.444792	-0.421836	-0.121019	-0.400654	-0.600642	-0.136185	-0.480499	-0.650623	-0.43869	0.306033	-0.522107	0.276324	-0.638857	-0.206049	-0.13028	-0.526832	-0.861815	0.333497	-0.659782	0.0198022	-0.10772	0.251028	-0.740613	-0.338797	0.538269	-0.254579	0.445028	0.4299	-0.234556	0.519997	0.574574	0.00226722	0.428381	0.709945
-4.67756	0.0425768	-1.43158	-0.698223	-0.912383	-0.320286	-0.558248	-0.934035	-0.513656	-0.858094	-0.374327	-0.306031	-1.13374	0.0158122	-0.627184	-0.584595	-0.444192	-0.421477	-0.120798	-0.399911	-0.60054	-0.13637	-0.480435	-0.649949	-0.438136	0.306582	-0.522297	0.277518	-0.637548	-0.205383	-0.130687	-0.524795	-0.862186	0.333047	-0.657864	0.0201026	-0.107867	0.252123	-0.740965	-0.338903	0.536625	-0.255426	0.444451	0.431475	-0.234975	0.519202	0.575172	0.00178433	0.426787	0.710514
-4.67658	0.0417827	-1.43069	-0.69714	-0.911146	-0.320139	-0.556149	-0.93466	-0.513055	-0.858008	-0.374676	-0.304965	-1.13347	0.0170428	-0.626845	-0.585366	-0.443593	-0.421116	-0.120572	-0.399167	-0.600422	-0.136554	-0.480371	-0.649276	-0.437574	0.30714	-0.522482	0.27872	-0.636235	-0.204711	-0.131094	-0.522744	-0.862556	0.332593	-0.655946	0.0203984	-0.108017	0.253209	-0.741324	-0.338998	0.534969	-0.256266	0.443868	0.433037	-0.235398	0.518403	0.57576	0.00128163	0.425192	0.711068
-4.6756	0.0409853	-1.4298	-0.696049	-0.9099	-0.319981	-0.554032	-0.935271	-0.51246	-0.857901	-0.375018	-0.3039	-1.13318	0.018262	-0.626516	-0.586127	-0.442996	-0.420753	-0.12034	-0.398424	-0.600287	-0.136738	-0.480306	-0.648603	-0.437004	0.307706	-0.522661	0.279932	-0.634918	-0.204033	-0.131501	-0.52068	-0.862923	0.332135	-0.654029	0.0206895	-0.108169	0.254285	-0.741691	-0.339083	0.533301	-0.2571	0.443278	0.434587	-0.235827	0.5176	0.576338	0.000759157	0.423597	0.711606
-4.67461	0.0401846	-1.4289	-0.694951	-0.908643	-0.31981	-0.551897	-0.935868	-0.51187	-0.857775	-0.375353	-0.302834	-1.1329	0.0194699	-0.626198	-0.586877	-0.442402	-0.420388	-0.120103	-0.39768	-0.600138	-0.136921	-0.48024	-0.647932	-0.436426	0.308279	-0.522834	0.281152	-0.633597	-0.20335	-0.131908	-0.518603	-0.863289	0.331673	-0.652113	0.020976	-0.108323	0.255351	-0.742064	-0.339157	0.531622	-0.257927	0.442681	0.436124	-0.23626	0.516793	0.576905	0.000216952	0.422003	0.712128
-4.67363	0.0393807	-1.42801	-0.693845	-0.907378	-0.319628	-0.549744	-0.936451	-0.511287	-0.857628	-0.375682	-0.301769	-1.13261	0.0206661	-0.625891	-0.587616	-0.44181	-0.420021	-0.119861	-0.396937	-0.599972	-0.137104	-0.480175	-0.647262	-0.43584	0.308859	-0.523002	0.282381	-0.632272	-0.20266	-0.132315	-0.516513	-0.863652	0.331206	-0.650199	0.0212576	-0.10848	0.256407	-0.742445	-0.339221	0.529932	-0.258748	0.442078	0.437649	-0.236698	0.515981	0.577461	-0.000344947	0.420408	0.712635
-4.67265	0.0385735	-1.42712	-0.692732	-0.906104	-0.319433	-0.547574	-0.937019	-0.510708	-0.857462	-0.376003	-0.300704	-1.13231	0.0218506	-0.625594	-0.588344	-0.441221	-0.419652	-0.119614	-0.396194	-0.599791	-0.137287	-0.48011	-0.646593	-0.435247	0.309447	-0.523165	0.283618	-0.630943	-0.201964	-0.132722	-0.51441	-0.864014	0.330736	-0.648285	0.0215344	-0.108639	0.257454	-0.742833	-0.339273	0.528232	-0.259562	0.441469	0.439161	-0.237141	0.515166	0.578006	-0.000926501	0.418813	0.713127
-4.67166	0.0377632	-1.42623	-0.691612	-0.90482	-0.319227	-0.545386	-0.937574	-0.510136	-0.857275	-0.376318	-0.29964	-1.13201	0.0230233	-0.625308	-0.58906	-0.440635	-0.419281	-0.119361	-0.395452	-0.599595	-0.13747	-0.480044	-0.645926	-0.434647	0.310041	-0.523322	0.284864	-0.629611	-0.201263	-0.13313	-0.512294	-0.864373	0.330263	-0.646373	0.0218064	-0.1088	0.258492	-0.743228	-0.339315	0.52652	-0.260369	0.440854	0.440661	-0.237589	0.514346	0.578542	-0.00152767	0.417219	0.713603
-4.67068	0.0369497	-1.42534	-0.690485	-0.903527	-0.31901	-0.543181	-0.938114	-0.50957	-0.85707	-0.376627	-0.298577	-1.1317	0.0241839	-0.625032	-0.589766	-0.440051	-0.418909	-0.119104	-0.39471	-0.599383	-0.137652	-0.479979	-0.645261	-0.434039	0.310643	-0.523473	0.286119	-0.628276	-0.200555	-0.133537	-0.510166	-0.86473	0.329785	-0.644462	0.0220733	-0.108963	0.25952	-0.74363	-0.339346	0.524799	-0.261169	0.440232	0.442147	-0.238042	0.513522	0.579066	-0.00214839	0.415625	0.714063
-4.6697	0.036133	-1.42445	-0.689351	-0.902226	-0.31878	-0.540959	-0.938641	-0.50901	-0.856844	-0.376929	-0.297515	-1.13139	0.0253325	-0.624767	-0.590461	-0.439471	-0.418536	-0.118842	-0.393969	-0.599155	-0.137834	-0.479914	-0.644598	-0.433425	0.311251	-0.52362	0.287382	-0.626937	-0.199842	-0.133945	-0.508025	-0.865085	0.329303	-0.642553	0.0223353	-0.109129	0.260538	-0.74404	-0.339366	0.523068	-0.261962	0.439605	0.443621	-0.2385	0.512695	0.57958	-0.00278863	0.414031	0.714508
-4.66872	0.0353133	-1.42356	-0.68821	-0.900916	-0.31854	-0.538721	-0.939154	-0.508457	-0.856599	-0.377225	-0.296454	-1.13108	0.0264688	-0.624512	-0.591144	-0.438894	-0.418161	-0.118574	-0.39323	-0.598913	-0.138016	-0.479849	-0.643937	-0.432804	0.311866	-0.523761	0.288653	-0.625594	-0.199122	-0.134353	-0.505871	-0.865438	0.328818	-0.640646	0.0225921	-0.109297	0.261547	-0.744456	-0.339375	0.521327	-0.262748	0.438973	0.445082	-0.238963	0.511863	0.580084	-0.00344834	0.412437	0.714938
-4.66773	0.0344906	-1.42267	-0.687063	-0.899597	-0.318288	-0.536466	-0.939653	-0.507909	-0.856334	-0.377514	-0.295395	-1.13076	0.0275927	-0.624268	-0.591816	-0.438321	-0.417786	-0.118302	-0.392491	-0.598656	-0.138198	-0.479785	-0.643278	-0.432175	0.312487	-0.523897	0.289933	-0.624249	-0.198397	-0.134762	-0.503706	-0.865788	0.328329	-0.63874	0.0228439	-0.109467	0.262547	-0.74488	-0.339373	0.519576	-0.263526	0.438335	0.446529	-0.23943	0.511027	0.580576	-0.00412744	0.410844	0.715353
-4.66675	0.0336649	-1.42179	-0.685908	-0.898269	-0.318025	-0.534194	-0.940138	-0.507368	-0.85605	-0.377797	-0.294338	-1.13043	0.0287042	-0.624034	-0.592477	-0.437751	-0.417409	-0.118024	-0.391753	-0.598383	-0.13838	-0.479722	-0.642621	-0.431541	0.313114	-0.524029	0.291222	-0.622901	-0.197666	-0.135171	-0.501528	-0.866135	0.327836	-0.636837	0.0230904	-0.109639	0.263538	-0.74531	-0.339361	0.517816	-0.264298	0.437691	0.447964	-0.239903	0.510188	0.581059	-0.0048259	0.409251	0.715753
-4.66577	0.0328362	-1.4209	-0.684748	-0.896934	-0.317752	-0.531907	-0.94061	-0.506834	-0.855746	-0.378075	-0.293283	-1.13011	0.029803	-0.62381	-0.593126	-0.437185	-0.417031	-0.117742	-0.391017	-0.598095	-0.138561	-0.479659	-0.641967	-0.4309	0.313748	-0.524155	0.292519	-0.62155	-0.196929	-0.135581	-0.499338	-0.86648	0.32734	-0.634937	0.0233317	-0.109814	0.264519	-0.745748	-0.339337	0.516048	-0.265062	0.437042	0.449385	-0.240381	0.509344	0.58153	-0.00554364	0.407659	0.716137
-4.66478	0.0320045	-1.42002	-0.683581	-0.895589	-0.317467	-0.529604	-0.941069	-0.506306	-0.855424	-0.378346	-0.292229	-1.12978	0.0308891	-0.623596	-0.593764	-0.436623	-0.416653	-0.117455	-0.390282	-0.597793	-0.138743	-0.479597	-0.641316	-0.430252	0.314387	-0.524277	0.293824	-0.620197	-0.196186	-0.135991	-0.497136	-0.866822	0.32684	-0.633039	0.0235677	-0.10999	0.265491	-0.746193	-0.339301	0.514271	-0.265818	0.436389	0.450794	-0.240863	0.508497	0.581991	-0.0062806	0.406067	0.716506
-4.6638	0.0311701	-1.41914	-0.682408	-0.894237	-0.317172	-0.527285	-0.941514	-0.505786	-0.855082	-0.378611	-0.291178	-1.12944	0.0319624	-0.623393	-0.594391	-0.436065	-0.416274	-0.117163	-0.389549	-0.597476	-0.138925	-0.479536	-0.640668	-0.429599	0.315031	-0.524394	0.295137	-0.618841	-0.195438	-0.136402	-0.494923	-0.867161	0.326337	-0.631143	0.0237983	-0.110169	0.266454	-0.746644	-0.339255	0.512485	-0.266567	0.43573	0.452189	-0.241351	0.507646	0.582442	-0.00703672	0.404476	0.716861
-4.66282	0.0303327	-1.41826	-0.681229	-0.892877	-0.316865	-0.52495	-0.941945	-0.505272	-0.854721	-0.37887	-0.29013	-1.1291	0.0330227	-0.6232	-0.595007	-0.435511	-0.415894	-0.116867	-0.388817	-0.597144	-0.139107	-0.479476	-0.640023	-0.42894	0.315681	-0.524506	0.296458	-0.617483	-0.194684	-0.136814	-0.492698	-0.867498	0.32583	-0.62925	0.0240235	-0.110349	0.267408	-0.747103	-0.339197	0.510692	-0.267307	0.435067	0.453571	-0.241843	0.506791	0.582881	-0.00781193	0.402886	0.7172
-4.66183	0.0294926	-1.41738	-0.680043	-0.891508	-0.316549	-0.522601	-0.942364	-0.504764	-0.854341	-0.379124	-0.289085	-1.12876	0.0340699	-0.623017	-0.595611	-0.434962	-0.415515	-0.116565	-0.388087	-0.596798	-0.13929	-0.479417	-0.639381	-0.428274	0.316336	-0.524614	0.297788	-0.616122	-0.193924	-0.137226	-0.490461	-0.867831	0.32532	-0.62736	0.0242432	-0.110532	0.268353	-0.747569	-0.339128	0.508891	-0.26804	0.434398	0.454939	-0.242341	0.505932	0.583311	-0.00860615	0.401296	0.717525
-4.66085	0.0286498	-1.41651	-0.678852	-0.890132	-0.316222	-0.520236	-0.942769	-0.504264	-0.853942	-0.379372	-0.288042	-1.12841	0.0351039	-0.622844	-0.596203	-0.434417	-0.415135	-0.116259	-0.387359	-0.596437	-0.139472	-0.47936	-0.638742	-0.427603	0.316996	-0.524718	0.299125	-0.61476	-0.193158	-0.137639	-0.488213	-0.868162	0.324806	-0.625473	0.0244574	-0.110717	0.269289	-0.748042	-0.339048	0.507082	-0.268766	0.433726	0.456294	-0.242843	0.50507	0.583729	-0.00941932	0.399707	0.717835
-4.65987	0.0278043	-1.41563	-0.677655	-0.888748	-0.315885	-0.517857	-0.943161	-0.503771	-0.853524	-0.379614	-0.287003	-1.12806	0.0361246	-0.622681	-0.596784	-0.433877	-0.414755	-0.115949	-0.386633	-0.596062	-0.139655	-0.479304	-0.638106	-0.426927	0.317661	-0.524817	0.300471	-0.613396	-0.192387	-0.138053	-0.485954	-0.868489	0.324289	-0.62359	0.024666	-0.110904	0.270216	-0.748521	-0.338957	0.505266	-0.269483	0.433049	0.457635	-0.24335	0.504204	0.584137	-0.0102513	0.398119	0.71813
-4.65889	0.0269562	-1.41476	-0.676453	-0.887356	-0.315537	-0.515464	-0.94354	-0.503286	-0.853087	-0.379851	-0.285966	-1.12771	0.0371319	-0.622527	-0.597354	-0.433341	-0.414375	-0.115633	-0.38591	-0.595673	-0.139838	-0.479249	-0.637475	-0.426245	0.318331	-0.524912	0.301824	-0.61203	-0.191609	-0.138468	-0.483684	-0.868814	0.323768	-0.62171	0.0248689	-0.111092	0.271134	-0.749008	-0.338854	0.503443	-0.270191	0.432368	0.458963	-0.243863	0.503334	0.584534	-0.0111022	0.396532	0.718411
-4.6579	0.0261054	-1.41389	-0.675245	-0.885957	-0.31518	-0.513056	-0.943906	-0.502807	-0.852632	-0.380083	-0.284934	-1.12735	0.0381257	-0.622384	-0.597912	-0.432811	-0.413995	-0.115313	-0.385188	-0.595269	-0.140021	-0.479196	-0.636847	-0.425558	0.319005	-0.525003	0.303185	-0.610662	-0.190827	-0.138884	-0.481403	-0.869135	0.323245	-0.619833	0.0250661	-0.111283	0.272043	-0.749501	-0.338739	0.501614	-0.270892	0.431683	0.460278	-0.24438	0.502461	0.584921	-0.0119717	0.394946	0.718677
-4.65692	0.0252522	-1.41303	-0.674031	-0.88455	-0.314813	-0.510634	-0.94426	-0.502336	-0.852159	-0.380309	-0.283905	-1.12699	0.0391059	-0.622251	-0.598459	-0.432286	-0.413615	-0.114989	-0.384469	-0.594851	-0.140205	-0.479144	-0.636223	-0.424867	0.319684	-0.52509	0.304554	-0.609293	-0.190038	-0.1393	-0.479111	-0.869453	0.322718	-0.61796	0.0252576	-0.111475	0.272944	-0.750002	-0.338614	0.499778	-0.271584	0.430995	0.461578	-0.244902	0.501585	0.585297	-0.0128598	0.393361	0.718929
-4.65594	0.0243965	-1.41216	-0.672813	-0.883136	-0.314435	-0.508199	-0.9446	-0.501873	-0.851667	-0.38053	-0.282881	-1.12663	0.0400724	-0.622127	-0.598994	-0.431766	-0.413236	-0.11466	-0.383753	-0.59442	-0.14039	-0.479094	-0.635603	-0.42417	0.320366	-0.525172	0.305931	-0.607922	-0.189244	-0.139718	-0.476809	-0.869767	0.322188	-0.616091	0.0254433	-0.11167	0.273836	-0.750509	-0.338476	0.497936	-0.272268	0.430302	0.462865	-0.24543	0.500705	0.585662	-0.0137664	0.391777	0.719166
-4.65495	0.0235383	-1.4113	-0.671589	-0.881714	-0.314049	-0.50575	-0.944928	-0.501417	-0.851156	-0.380746	-0.28186	-1.12627	0.0410251	-0.622013	-0.599517	-0.431251	-0.412857	-0.114326	-0.383039	-0.593974	-0.140574	-0.479046	-0.634988	-0.423468	0.321053	-0.525251	0.307316	-0.60655	-0.188445	-0.140136	-0.474496	-0.870078	0.321655	-0.614226	0.0256231	-0.111866	0.274719	-0.751023	-0.338328	0.496088	-0.272944	0.429606	0.464139	-0.245962	0.499821	0.586017	-0.0146915	0.390194	0.719389
-4.65397	0.0226778	-1.41045	-0.670359	-0.880285	-0.313653	-0.503288	-0.945244	-0.500969	-0.850628	-0.380956	-0.280844	-1.1259	0.0419638	-0.621908	-0.600029	-0.430742	-0.412479	-0.113989	-0.382328	-0.593515	-0.14076	-0.479	-0.634377	-0.422762	0.321743	-0.525326	0.308708	-0.605178	-0.187639	-0.140556	-0.472172	-0.870386	0.321119	-0.612365	0.025797	-0.112064	0.275594	-0.751544	-0.338167	0.494235	-0.273611	0.428907	0.465398	-0.246499	0.498934	0.586361	-0.0156349	0.388612	0.719598
-4.65299	0.021815	-1.40959	-0.669125	-0.87885	-0.313247	-0.500813	-0.945547	-0.500528	-0.850081	-0.381162	-0.279832	-1.12553	0.0428886	-0.621813	-0.600529	-0.430239	-0.412101	-0.113647	-0.38162	-0.593042	-0.140945	-0.478956	-0.63377	-0.422052	0.322437	-0.525398	0.310108	-0.603804	-0.186829	-0.140977	-0.469839	-0.87069	0.32058	-0.610508	0.0259649	-0.112264	0.27646	-0.752071	-0.337996	0.492376	-0.274269	0.428204	0.466644	-0.247041	0.498044	0.586695	-0.0165966	0.387032	0.719792
-4.652	0.0209499	-1.40874	-0.667886	-0.877407	-0.312832	-0.498325	-0.945837	-0.500096	-0.849516	-0.381363	-0.278825	-1.12516	0.0437993	-0.621728	-0.601017	-0.429742	-0.411725	-0.1133	-0.380915	-0.592556	-0.141132	-0.478915	-0.633168	-0.421337	0.323135	-0.525465	0.311515	-0.602429	-0.186012	-0.141399	-0.467495	-0.870991	0.320039	-0.608656	0.0261268	-0.112465	0.277318	-0.752605	-0.337812	0.490512	-0.274918	0.427498	0.467875	-0.247588	0.497151	0.587017	-0.0175764	0.385453	0.719973
-4.65102	0.0200827	-1.40789	-0.666643	-0.875958	-0.312408	-0.495825	-0.946115	-0.499671	-0.848934	-0.381559	-0.277823	-1.12478	0.0446959	-0.621652	-0.601494	-0.42925	-0.411349	-0.112949	-0.380213	-0.592056	-0.141319	-0.478875	-0.632571	-0.420618	0.323835	-0.525529	0.31293	-0.601054	-0.185191	-0.141822	-0.465142	-0.871288	0.319494	-0.606809	0.0262826	-0.112669	0.278168	-0.753146	-0.337617	0.488644	-0.275559	0.426789	0.469093	-0.24814	0.496254	0.587329	-0.0185742	0.383875	0.72014
-4.65004	0.0192134	-1.40705	-0.665394	-0.874501	-0.311975	-0.493313	-0.946381	-0.499254	-0.848333	-0.381751	-0.276826	-1.12441	0.0455781	-0.621585	-0.601959	-0.428765	-0.410975	-0.112594	-0.379514	-0.591543	-0.141507	-0.478838	-0.631979	-0.419895	0.324539	-0.52559	0.314352	-0.599679	-0.184364	-0.142246	-0.462779	-0.871581	0.318947	-0.604966	0.0264323	-0.112874	0.279009	-0.753694	-0.337411	0.486771	-0.276191	0.426077	0.470297	-0.248697	0.495354	0.587631	-0.01959	0.382299	0.720292
-4.64905	0.018342	-1.40621	-0.664141	-0.873039	-0.311534	-0.490788	-0.946635	-0.498846	-0.847715	-0.381937	-0.275835	-1.12403	0.046446	-0.621528	-0.602413	-0.428285	-0.410601	-0.112235	-0.378819	-0.591017	-0.141695	-0.478803	-0.631392	-0.419168	0.325246	-0.525647	0.315781	-0.598303	-0.183531	-0.142672	-0.460406	-0.871871	0.318397	-0.603127	0.0265759	-0.11308	0.279842	-0.754248	-0.337193	0.484894	-0.276813	0.425363	0.471487	-0.249259	0.494451	0.587922	-0.0206235	0.380724	0.720431
-4.64807	0.0174686	-1.40537	-0.662884	-0.871569	-0.311083	-0.488253	-0.946877	-0.498446	-0.84708	-0.38212	-0.274848	-1.12365	0.0472995	-0.621479	-0.602854	-0.427813	-0.410229	-0.111872	-0.378128	-0.590478	-0.141884	-0.478771	-0.63081	-0.418438	0.325955	-0.525701	0.317217	-0.596927	-0.182693	-0.143099	-0.458023	-0.872156	0.317844	-0.601294	0.0267132	-0.113288	0.280667	-0.754809	-0.336963	0.483013	-0.277427	0.424646	0.472663	-0.249826	0.493545	0.588202	-0.0216749	0.379151	0.720557
-4.64709	0.0165932	-1.40454	-0.661622	-0.870093	-0.310624	-0.485706	-0.947107	-0.498053	-0.846427	-0.382297	-0.273868	-1.12326	0.0481385	-0.62144	-0.603284	-0.427346	-0.409859	-0.111505	-0.377439	-0.589925	-0.142074	-0.478741	-0.630234	-0.417704	0.326667	-0.525752	0.318661	-0.59555	-0.18185	-0.143527	-0.455632	-0.872438	0.317289	-0.599466	0.0268443	-0.113498	0.281484	-0.755376	-0.336722	0.481128	-0.278031	0.423927	0.473825	-0.250398	0.492636	0.588471	-0.0227438	0.377579	0.720668
-4.64611	0.015716	-1.40371	-0.660356	-0.868611	-0.310156	-0.483147	-0.947325	-0.49767	-0.845756	-0.382471	-0.272894	-1.12288	0.048963	-0.62141	-0.603702	-0.426886	-0.409489	-0.111133	-0.376755	-0.58936	-0.142265	-0.478714	-0.629663	-0.416967	0.327381	-0.525799	0.320112	-0.594174	-0.181001	-0.143956	-0.453231	-0.872717	0.316731	-0.597643	0.026969	-0.11371	0.282293	-0.75595	-0.336469	0.47924	-0.278627	0.423206	0.474972	-0.250974	0.491724	0.58873	-0.0238301	0.376009	0.720767
-4.64512	0.0148371	-1.40288	-0.659085	-0.867122	-0.309681	-0.480578	-0.947531	-0.497294	-0.845069	-0.38264	-0.271925	-1.12249	0.0497727	-0.621388	-0.604108	-0.426433	-0.409122	-0.110758	-0.376074	-0.588782	-0.142457	-0.478689	-0.629098	-0.416227	0.328098	-0.525844	0.321569	-0.592798	-0.180147	-0.144387	-0.450821	-0.872991	0.316171	-0.595826	0.0270874	-0.113923	0.283093	-0.75653	-0.336204	0.477349	-0.279212	0.422482	0.476106	-0.251556	0.490809	0.588978	-0.0249339	0.374441	0.720852
-4.64414	0.0139563	-1.40206	-0.657811	-0.865628	-0.309197	-0.477999	-0.947726	-0.496927	-0.844364	-0.382805	-0.270963	-1.12211	0.0505678	-0.621376	-0.604503	-0.425987	-0.408756	-0.110379	-0.375398	-0.588192	-0.14265	-0.478668	-0.628538	-0.415484	0.328816	-0.525886	0.323034	-0.591423	-0.179288	-0.14482	-0.448403	-0.873261	0.315608	-0.594014	0.0271994	-0.114137	0.283886	-0.757116	-0.335928	0.475456	-0.279789	0.421757	0.477225	-0.252142	0.489892	0.589215	-0.0260549	0.372875	0.720923
-4.64316	0.013074	-1.40125	-0.656533	-0.864127	-0.308705	-0.475409	-0.947909	-0.496569	-0.843643	-0.382966	-0.270007	-1.12172	0.051348	-0.621372	-0.604886	-0.425548	-0.408392	-0.109995	-0.374725	-0.587589	-0.142843	-0.47865	-0.627985	-0.414738	0.329537	-0.525924	0.324505	-0.590048	-0.178423	-0.145253	-0.445976	-0.873527	0.315043	-0.592208	0.027305	-0.114353	0.284672	-0.757709	-0.33564	0.473559	-0.280356	0.421029	0.47833	-0.252734	0.488971	0.589441	-0.027193	0.371311	0.720982
-4.64217	0.01219	-1.40044	-0.655251	-0.86262	-0.308205	-0.472809	-0.948081	-0.496219	-0.842904	-0.383123	-0.269058	-1.12133	0.0521134	-0.621376	-0.605256	-0.425115	-0.40803	-0.109608	-0.374057	-0.586973	-0.143038	-0.478634	-0.627438	-0.413989	0.330259	-0.52596	0.325983	-0.588674	-0.177554	-0.145689	-0.44354	-0.87379	0.314476	-0.590408	0.027404	-0.11457	0.285449	-0.758309	-0.335341	0.47166	-0.280914	0.420301	0.479421	-0.25333	0.488048	0.589657	-0.0283481	0.369748	0.721027
-4.64119	0.0113046	-1.39963	-0.653965	-0.861108	-0.307697	-0.4702	-0.948241	-0.495878	-0.842149	-0.383275	-0.268115	-1.12094	0.0528639	-0.62139	-0.605615	-0.42469	-0.40767	-0.109218	-0.373393	-0.586345	-0.143234	-0.478622	-0.626897	-0.413238	0.330982	-0.525993	0.327467	-0.5873	-0.176679	-0.146125	-0.441096	-0.874048	0.313907	-0.588613	0.0274965	-0.114788	0.286219	-0.758914	-0.33503	0.46976	-0.281461	0.41957	0.480498	-0.253931	0.487122	0.589862	-0.0295201	0.368188	0.721059
-4.64021	0.0104177	-1.39883	-0.652675	-0.85959	-0.307182	-0.467581	-0.94839	-0.495546	-0.841378	-0.383424	-0.26718	-1.12054	0.0535994	-0.621411	-0.605963	-0.424273	-0.407313	-0.108823	-0.372733	-0.585706	-0.14343	-0.478613	-0.626362	-0.412484	0.331708	-0.526023	0.328959	-0.585928	-0.175799	-0.146564	-0.438644	-0.874302	0.313335	-0.586825	0.0275825	-0.115008	0.286981	-0.759526	-0.334707	0.467857	-0.282	0.418838	0.481561	-0.254537	0.486194	0.590057	-0.0307088	0.366629	0.721079
-4.63922	0.00952946	-1.39803	-0.651382	-0.858066	-0.306659	-0.464953	-0.948528	-0.495223	-0.840589	-0.383569	-0.266252	-1.12015	0.0543198	-0.621441	-0.606298	-0.423862	-0.406957	-0.108425	-0.372078	-0.585054	-0.143628	-0.478607	-0.625834	-0.411728	0.332434	-0.526051	0.330456	-0.584556	-0.174914	-0.147004	-0.436184	-0.874552	0.312762	-0.585042	0.0276618	-0.11523	0.287736	-0.760144	-0.334373	0.465953	-0.282528	0.418105	0.482609	-0.255147	0.485262	0.59024	-0.0319141	0.365073	0.721086
-4.63824	0.00863993	-1.39724	-0.650085	-0.856536	-0.306129	-0.462316	-0.948655	-0.494909	-0.839785	-0.383711	-0.26533	-1.11976	0.0550251	-0.62148	-0.606621	-0.42346	-0.406604	-0.108023	-0.371428	-0.58439	-0.143827	-0.478604	-0.625313	-0.41097	0.333161	-0.526077	0.331961	-0.583186	-0.174024	-0.147445	-0.433716	-0.874797	0.312187	-0.583266	0.0277344	-0.115452	0.288483	-0.760769	-0.334027	0.464048	-0.283047	0.417371	0.483643	-0.255763	0.484329	0.590413	-0.0331359	0.363519	0.72108
-4.63726	0.00774919	-1.39645	-0.648785	-0.855001	-0.305592	-0.459671	-0.94877	-0.494603	-0.838964	-0.383848	-0.264417	-1.11936	0.0557153	-0.621526	-0.606933	-0.423065	-0.406253	-0.107617	-0.370782	-0.583714	-0.144027	-0.478605	-0.624798	-0.41021	0.33389	-0.5261	0.333471	-0.581817	-0.173128	-0.147888	-0.43124	-0.875039	0.31161	-0.581497	0.0278004	-0.115676	0.289223	-0.761399	-0.333669	0.462142	-0.283556	0.416636	0.484662	-0.256383	0.483393	0.590575	-0.034374	0.361968	0.721061
-4.63628	0.00685733	-1.39567	-0.647482	-0.853461	-0.305047	-0.457017	-0.948875	-0.494307	-0.838128	-0.383983	-0.263511	-1.11897	0.0563902	-0.62158	-0.607233	-0.422677	-0.405905	-0.107208	-0.370141	-0.583027	-0.144229	-0.47861	-0.62429	-0.409449	0.334619	-0.52612	0.334988	-0.580449	-0.172228	-0.148333	-0.428757	-0.875276	0.311031	-0.579734	0.0278595	-0.115901	0.289955	-0.762035	-0.3333	0.460236	-0.284055	0.415901	0.485667	-0.257008	0.482454	0.590726	-0.0356282	0.360418	0.72103
-4.63529	0.00596441	-1.39489	-0.646175	-0.851915	-0.304496	-0.454356	-0.948969	-0.49402	-0.837275	-0.384113	-0.262613	-1.11857	0.0570499	-0.621643	-0.60752	-0.422298	-0.405559	-0.106796	-0.369505	-0.582328	-0.144431	-0.478618	-0.623789	-0.408686	0.335348	-0.526139	0.33651	-0.579084	-0.171323	-0.148779	-0.426266	-0.875509	0.31045	-0.577977	0.0279119	-0.116127	0.29068	-0.762677	-0.33292	0.458328	-0.284544	0.415164	0.486658	-0.257638	0.481514	0.590867	-0.0368985	0.358871	0.720987
-4.63431	0.00507053	-1.39412	-0.644865	-0.850364	-0.303938	-0.451687	-0.949052	-0.493741	-0.836407	-0.384241	-0.261723	-1.11817	0.0576942	-0.621713	-0.607796	-0.421926	-0.405217	-0.10638	-0.368874	-0.581618	-0.144635	-0.47863	-0.623296	-0.407921	0.336078	-0.526155	0.338039	-0.577719	-0.170413	-0.149227	-0.423768	-0.875738	0.309868	-0.576228	0.0279575	-0.116354	0.291399	-0.763326	-0.332528	0.456421	-0.285023	0.414427	0.487634	-0.258273	0.480571	0.590997	-0.0381847	0.357327	0.720932
-4.63333	0.00417575	-1.39335	-0.643552	-0.848808	-0.303373	-0.449011	-0.949125	-0.493473	-0.835523	-0.384365	-0.260841	-1.11778	0.0583232	-0.621791	-0.60806	-0.421563	-0.404877	-0.10596	-0.368248	-0.580897	-0.14484	-0.478645	-0.622809	-0.407155	0.336809	-0.526169	0.339574	-0.576357	-0.169498	-0.149676	-0.421263	-0.875962	0.309284	-0.574485	0.0279962	-0.116582	0.29211	-0.76398	-0.332124	0.454514	-0.285492	0.41369	0.488596	-0.258912	0.479625	0.591116	-0.0394866	0.355785	0.720864
-4.63234	0.00328018	-1.39259	-0.642237	-0.847247	-0.302802	-0.446327	-0.949187	-0.493213	-0.834623	-0.384485	-0.259967	-1.11738	0.0589368	-0.621876	-0.608313	-0.421208	-0.40454	-0.105538	-0.367628	-0.580164	-0.145047	-0.478664	-0.62233	-0.406388	0.337539	-0.526181	0.341115	-0.574997	-0.168579	-0.150127	-0.418752	-0.876182	0.308699	-0.572749	0.028028	-0.116811	0.292814	-0.76464	-0.331709	0.452607	-0.28595	0.412953	0.489544	-0.259556	0.478678	0.591224	-0.040804	0.354246	0.720784
-4.63136	0.00238388	-1.39184	-0.640918	-0.845681	-0.302224	-0.443637	-0.949239	-0.492963	-0.833708	-0.384603	-0.259102	-1.11698	0.059535	-0.621969	-0.608553	-0.420861	-0.404205	-0.105112	-0.367012	-0.57942	-0.145255	-0.478687	-0.621859	-0.40562	0.33827	-0.526191	0.342661	-0.573639	-0.167654	-0.15058	-0.416233	-0.876397	0.308112	-0.571021	0.0280529	-0.117041	0.293511	-0.765306	-0.331282	0.450701	-0.286399	0.412215	0.490477	-0.260205	0.477729	0.591321	-0.0421369	0.352709	0.720693
-4.63038	0.00148695	-1.39109	-0.639596	-0.844111	-0.301641	-0.440941	-0.949281	-0.492722	-0.832778	-0.384717	-0.258245	-1.11659	0.0601176	-0.62207	-0.608781	-0.420522	-0.403874	-0.104683	-0.366403	-0.578666	-0.145464	-0.478714	-0.621395	-0.404851	0.339	-0.526199	0.344213	-0.572284	-0.166725	-0.151035	-0.413708	-0.876608	0.307524	-0.569299	0.0280708	-0.117272	0.294201	-0.765977	-0.330844	0.448796	-0.286837	0.411477	0.491395	-0.260859	0.476777	0.591408	-0.0434851	0.351175	0.72059
-4.62939	0.000589462	-1.39034	-0.638272	-0.842535	-0.301051	-0.438238	-0.949312	-0.492491	-0.831833	-0.384828	-0.257397	-1.11619	0.0606847	-0.622177	-0.608997	-0.420192	-0.403547	-0.10425	-0.365798	-0.5779	-0.145675	-0.478745	-0.620939	-0.404082	0.33973	-0.526205	0.345771	-0.570931	-0.165791	-0.151491	-0.411177	-0.876815	0.306935	-0.567585	0.0280816	-0.117504	0.294885	-0.766654	-0.330394	0.446892	-0.287265	0.41074	0.4923	-0.261517	0.475824	0.591484	-0.0448483	0.349644	0.720475
-4.62841	-0.000308487	-1.38961	-0.636946	-0.840955	-0.300455	-0.43553	-0.949333	-0.492269	-0.830873	-0.384937	-0.256558	-1.11579	0.0612363	-0.622292	-0.609202	-0.41987	-0.403222	-0.103815	-0.3652	-0.577124	-0.145888	-0.47878	-0.620491	-0.403312	0.34046	-0.52621	0.347334	-0.56958	-0.164852	-0.151949	-0.408639	-0.877017	0.306345	-0.565879	0.0280855	-0.117737	0.295562	-0.767337	-0.329933	0.444989	-0.287683	0.410003	0.493189	-0.262179	0.474869	0.591549	-0.0462265	0.348116	0.720348
-4.62743	-0.00120681	-1.38888	-0.635616	-0.83937	-0.299853	-0.432816	-0.949344	-0.492057	-0.829898	-0.385042	-0.255729	-1.1154	0.0617723	-0.622414	-0.609394	-0.419557	-0.402901	-0.103376	-0.364607	-0.576338	-0.146102	-0.47882	-0.620051	-0.402541	0.341189	-0.526213	0.348902	-0.568233	-0.163909	-0.152409	-0.406096	-0.877215	0.305753	-0.56418	0.0280822	-0.117971	0.296232	-0.768025	-0.329461	0.443089	-0.28809	0.409267	0.494065	-0.262847	0.473912	0.591603	-0.0476195	0.34659	0.720211
-4.62644	-0.00210542	-1.38815	-0.634285	-0.837781	-0.299246	-0.430097	-0.949346	-0.491855	-0.828908	-0.385145	-0.254908	-1.115	0.0622927	-0.622543	-0.609575	-0.419253	-0.402583	-0.102935	-0.36402	-0.575541	-0.146317	-0.478863	-0.619619	-0.401771	0.341917	-0.526214	0.350476	-0.566888	-0.162961	-0.15287	-0.403547	-0.877409	0.305161	-0.562489	0.0280719	-0.118205	0.296896	-0.768719	-0.328977	0.44119	-0.288487	0.408531	0.494926	-0.263519	0.472953	0.591646	-0.0490271	0.345068	0.720061
-4.62546	-0.00300423	-1.38743	-0.632951	-0.836187	-0.298633	-0.427373	-0.949337	-0.491662	-0.827904	-0.385245	-0.254097	-1.11461	0.0627974	-0.622679	-0.609744	-0.418957	-0.402268	-0.10249	-0.363439	-0.574733	-0.146534	-0.478911	-0.619195	-0.401	0.342644	-0.526214	0.352055	-0.565546	-0.162008	-0.153333	-0.400992	-0.877597	0.304567	-0.560805	0.0280544	-0.118441	0.297553	-0.769419	-0.328482	0.439293	-0.288873	0.407796	0.495772	-0.264195	0.471993	0.591678	-0.0504491	0.343549	0.719901
-4.62448	-0.00390315	-1.38672	-0.631614	-0.83459	-0.298015	-0.424644	-0.949319	-0.491479	-0.826886	-0.385342	-0.253295	-1.11422	0.0632864	-0.622821	-0.609901	-0.418671	-0.401958	-0.102043	-0.362863	-0.573916	-0.146753	-0.478963	-0.618779	-0.40023	0.343371	-0.526212	0.353639	-0.564207	-0.161051	-0.153798	-0.398431	-0.877782	0.303973	-0.55913	0.0280297	-0.118677	0.298204	-0.770123	-0.327976	0.437398	-0.289249	0.407061	0.496604	-0.264876	0.471031	0.5917	-0.0518854	0.342033	0.71973
-4.6235	-0.00480208	-1.38602	-0.630276	-0.832988	-0.297392	-0.421911	-0.949291	-0.491305	-0.825853	-0.385437	-0.252503	-1.11382	0.0637597	-0.62297	-0.610046	-0.418393	-0.401651	-0.101593	-0.362294	-0.573089	-0.146973	-0.479019	-0.618372	-0.399459	0.344096	-0.526209	0.355228	-0.562872	-0.16009	-0.154265	-0.395866	-0.877962	0.303379	-0.557462	0.0279979	-0.118913	0.298849	-0.770833	-0.327458	0.435507	-0.289614	0.406328	0.497422	-0.265562	0.470067	0.591711	-0.0533358	0.34052	0.719548
-4.62251	-0.00570094	-1.38532	-0.628935	-0.831381	-0.296764	-0.419175	-0.949253	-0.491142	-0.824806	-0.385529	-0.251721	-1.11343	0.0642174	-0.623125	-0.610179	-0.418125	-0.401347	-0.10114	-0.361732	-0.572252	-0.147195	-0.47908	-0.617974	-0.39869	0.34482	-0.526205	0.356822	-0.56154	-0.159124	-0.154733	-0.393295	-0.878137	0.302783	-0.555803	0.0279588	-0.11915	0.299487	-0.771548	-0.32693	0.433618	-0.289968	0.405596	0.498225	-0.266252	0.469102	0.591711	-0.0548001	0.33901	0.719355
-4.62153	-0.00659962	-1.38462	-0.627592	-0.829771	-0.296131	-0.416434	-0.949207	-0.490988	-0.823746	-0.385618	-0.250949	-1.11304	0.0646592	-0.623287	-0.6103	-0.417865	-0.401048	-0.100684	-0.361175	-0.571405	-0.147418	-0.479145	-0.617584	-0.39792	0.345542	-0.526199	0.358421	-0.560212	-0.158154	-0.155203	-0.390719	-0.878308	0.302187	-0.554151	0.0279124	-0.119388	0.300119	-0.772269	-0.32639	0.431732	-0.290312	0.404865	0.499013	-0.266946	0.468136	0.591699	-0.0562781	0.337504	0.719151
-4.62055	-0.00749804	-1.38394	-0.626247	-0.828157	-0.295492	-0.413691	-0.949151	-0.490845	-0.822671	-0.385706	-0.250187	-1.11265	0.0650854	-0.623455	-0.610409	-0.417615	-0.400752	-0.100226	-0.360625	-0.570548	-0.147644	-0.479215	-0.617203	-0.397152	0.346263	-0.526193	0.360024	-0.558887	-0.157179	-0.155675	-0.388138	-0.878474	0.301591	-0.552508	0.0278587	-0.119626	0.300746	-0.772994	-0.325839	0.42985	-0.290645	0.404135	0.499788	-0.267645	0.467168	0.591678	-0.0577696	0.336001	0.718937
-4.61956	-0.0083961	-1.38326	-0.624901	-0.826539	-0.29485	-0.410944	-0.949085	-0.490711	-0.821584	-0.38579	-0.249435	-1.11226	0.0654957	-0.623628	-0.610507	-0.417374	-0.40046	-0.0997648	-0.360081	-0.569683	-0.147871	-0.479289	-0.616831	-0.396384	0.346983	-0.526185	0.361632	-0.557566	-0.156201	-0.156149	-0.385553	-0.878636	0.300994	-0.550873	0.0277978	-0.119865	0.301366	-0.773725	-0.325277	0.427972	-0.290968	0.403408	0.500547	-0.268348	0.466199	0.591645	-0.0592745	0.334501	0.718712
-4.61858	-0.00929371	-1.38259	-0.623552	-0.824917	-0.294203	-0.408195	-0.949011	-0.490587	-0.820482	-0.385873	-0.248694	-1.11187	0.0658903	-0.623808	-0.610592	-0.417143	-0.400172	-0.0993013	-0.359544	-0.568807	-0.1481	-0.479368	-0.616468	-0.395617	0.3477	-0.526176	0.363245	-0.556249	-0.155218	-0.156624	-0.382964	-0.878793	0.300397	-0.549247	0.0277295	-0.120104	0.301981	-0.774461	-0.324704	0.426097	-0.291279	0.402681	0.501293	-0.269056	0.465229	0.591601	-0.0607926	0.333005	0.718477
-4.6176	-0.0101908	-1.38192	-0.622202	-0.823291	-0.293551	-0.405443	-0.948927	-0.490474	-0.819368	-0.385953	-0.247963	-1.11149	0.0662691	-0.623994	-0.610666	-0.416921	-0.399889	-0.0988353	-0.359013	-0.567923	-0.14833	-0.479452	-0.616114	-0.394852	0.348416	-0.526166	0.364862	-0.554936	-0.15423	-0.157101	-0.38037	-0.878945	0.2998	-0.54763	0.0276538	-0.120344	0.302589	-0.775201	-0.32412	0.424227	-0.29158	0.401957	0.502024	-0.269768	0.464257	0.591546	-0.0623237	0.331513	0.718232
-4.61661	-0.0110872	-1.38126	-0.62085	-0.821662	-0.292895	-0.40269	-0.948835	-0.49037	-0.81824	-0.386032	-0.247243	-1.1111	0.066632	-0.624185	-0.610728	-0.416708	-0.399609	-0.0983669	-0.358489	-0.56703	-0.148563	-0.47954	-0.615769	-0.394087	0.349129	-0.526155	0.366483	-0.553628	-0.153239	-0.15758	-0.377772	-0.879093	0.299202	-0.546021	0.0275707	-0.120584	0.303192	-0.775947	-0.323526	0.42236	-0.29187	0.401234	0.502741	-0.270484	0.463285	0.591481	-0.0638676	0.330025	0.717977
-4.61563	-0.0119828	-1.38061	-0.619496	-0.82003	-0.292235	-0.399935	-0.948734	-0.490277	-0.817099	-0.386108	-0.246533	-1.11072	0.0669792	-0.624382	-0.610778	-0.416505	-0.399334	-0.0978961	-0.357972	-0.566127	-0.148797	-0.479634	-0.615433	-0.393325	0.34984	-0.526143	0.368108	-0.552324	-0.152244	-0.158061	-0.37517	-0.879237	0.298605	-0.54442	0.0274803	-0.120824	0.303789	-0.776697	-0.32292	0.420499	-0.29215	0.400514	0.503443	-0.271204	0.462311	0.591404	-0.0654241	0.32854	0.717712
-4.61465	-0.0128776	-1.37997	-0.618141	-0.818394	-0.291572	-0.397178	-0.948624	-0.490194	-0.815946	-0.386182	-0.245835	-1.11034	0.0673106	-0.624585	-0.610816	-0.416312	-0.399063	-0.097423	-0.357462	-0.565216	-0.149034	-0.479732	-0.615107	-0.392563	0.350549	-0.526131	0.369737	-0.551024	-0.151244	-0.158543	-0.372564	-0.879376	0.298008	-0.542829	0.0273824	-0.121065	0.304381	-0.777452	-0.322304	0.418642	-0.292418	0.399795	0.504131	-0.271929	0.461337	0.591316	-0.0669929	0.327058	0.717438
-4.61367	-0.0137715	-1.37933	-0.616785	-0.816754	-0.290904	-0.394421	-0.948505	-0.490121	-0.81478	-0.386254	-0.245147	-1.10996	0.0676261	-0.624792	-0.610842	-0.416128	-0.398796	-0.0969476	-0.356958	-0.564296	-0.149272	-0.479834	-0.61479	-0.391804	0.351256	-0.526117	0.371371	-0.549729	-0.150241	-0.159027	-0.369955	-0.87951	0.297411	-0.541246	0.027277	-0.121306	0.304968	-0.778212	-0.321677	0.416791	-0.292675	0.399079	0.504805	-0.272658	0.460362	0.591218	-0.068574	0.325581	0.717153
-4.61268	-0.0146643	-1.37871	-0.615427	-0.815111	-0.290233	-0.391662	-0.948378	-0.490058	-0.813601	-0.386324	-0.244471	-1.10958	0.0679258	-0.625005	-0.610857	-0.415954	-0.398534	-0.0964701	-0.356462	-0.563368	-0.149512	-0.479942	-0.614483	-0.391046	0.35196	-0.526103	0.373008	-0.548438	-0.149233	-0.159512	-0.367342	-0.87964	0.296814	-0.539673	0.0271642	-0.121547	0.305549	-0.778977	-0.321039	0.414945	-0.292922	0.398366	0.505464	-0.273391	0.459386	0.591108	-0.0701671	0.324108	0.71686
-4.6117	-0.0155559	-1.37808	-0.614067	-0.813465	-0.289558	-0.388904	-0.948243	-0.490006	-0.81241	-0.386393	-0.243806	-1.1092	0.0682098	-0.625223	-0.610859	-0.41579	-0.398276	-0.0959904	-0.355973	-0.562432	-0.149754	-0.480055	-0.614185	-0.390291	0.352661	-0.526089	0.374648	-0.547153	-0.148222	-0.159999	-0.364727	-0.879766	0.296218	-0.538109	0.0270438	-0.121788	0.306124	-0.779746	-0.32039	0.413104	-0.293157	0.397654	0.506109	-0.274128	0.45841	0.590988	-0.071772	0.322639	0.716556
-4.61072	-0.0164463	-1.37747	-0.612706	-0.811816	-0.28888	-0.386145	-0.948099	-0.489963	-0.811207	-0.386459	-0.243152	-1.10883	0.0684779	-0.625446	-0.61085	-0.415636	-0.398023	-0.0955086	-0.355491	-0.561487	-0.149998	-0.480172	-0.613898	-0.389538	0.35336	-0.526074	0.376293	-0.545872	-0.147207	-0.160488	-0.362108	-0.879887	0.295622	-0.536553	0.026916	-0.122029	0.306695	-0.780519	-0.319732	0.411269	-0.293382	0.396946	0.50674	-0.27487	0.457432	0.590856	-0.0733885	0.321173	0.716244
-4.60973	-0.0173354	-1.37687	-0.611344	-0.810164	-0.288199	-0.383387	-0.947947	-0.489931	-0.809993	-0.386524	-0.24251	-1.10846	0.0687302	-0.625673	-0.61083	-0.415491	-0.397774	-0.0950248	-0.355016	-0.560534	-0.150244	-0.480295	-0.61362	-0.388787	0.354056	-0.526058	0.37794	-0.544597	-0.146188	-0.160978	-0.359486	-0.880003	0.295026	-0.535007	0.0267806	-0.12227	0.30726	-0.781297	-0.319062	0.40944	-0.293596	0.39624	0.507356	-0.275615	0.456455	0.590714	-0.0750163	0.319712	0.715922
-4.60875	-0.018223	-1.37627	-0.609981	-0.808509	-0.287515	-0.380629	-0.947786	-0.48991	-0.808766	-0.386587	-0.24188	-1.10809	0.0689668	-0.625905	-0.610797	-0.415357	-0.39753	-0.0945391	-0.354548	-0.559573	-0.150492	-0.480423	-0.613352	-0.388038	0.354749	-0.526042	0.379592	-0.543326	-0.145165	-0.16147	-0.356862	-0.880115	0.294432	-0.53347	0.0266377	-0.122511	0.30782	-0.782079	-0.318382	0.407618	-0.293798	0.395537	0.507959	-0.276364	0.455477	0.59056	-0.0766554	0.318255	0.715592
-4.60777	-0.019109	-1.37568	-0.608617	-0.806851	-0.286827	-0.377872	-0.947618	-0.489899	-0.807527	-0.386649	-0.241261	-1.10772	0.0691875	-0.626142	-0.610753	-0.415233	-0.397291	-0.0940514	-0.354088	-0.558605	-0.150742	-0.480555	-0.613094	-0.387292	0.355439	-0.526026	0.381246	-0.542061	-0.144139	-0.161964	-0.354235	-0.880222	0.293838	-0.531943	0.0264872	-0.122753	0.308376	-0.782865	-0.317692	0.405801	-0.29399	0.394838	0.508547	-0.277118	0.454498	0.590396	-0.0783054	0.316803	0.715252
-4.60678	-0.0199934	-1.37509	-0.607252	-0.80519	-0.286137	-0.375117	-0.947442	-0.489898	-0.806278	-0.386709	-0.240654	-1.10736	0.0693925	-0.626383	-0.610697	-0.415119	-0.397056	-0.093562	-0.353635	-0.557628	-0.150994	-0.480693	-0.612846	-0.386549	0.356125	-0.526009	0.382904	-0.540802	-0.143109	-0.162459	-0.351606	-0.880325	0.293245	-0.530425	0.0263291	-0.122994	0.308926	-0.783656	-0.316992	0.403992	-0.294171	0.394141	0.509121	-0.277875	0.453519	0.59022	-0.0799662	0.315354	0.714904
-4.6058	-0.0208759	-1.37452	-0.605886	-0.803527	-0.285445	-0.372363	-0.947258	-0.489908	-0.805016	-0.386767	-0.240059	-1.10699	0.0695818	-0.626628	-0.610629	-0.415014	-0.396826	-0.0930707	-0.35319	-0.556645	-0.151249	-0.480836	-0.612608	-0.385809	0.356808	-0.525992	0.384564	-0.539548	-0.142076	-0.162956	-0.348975	-0.880424	0.292652	-0.528917	0.0261635	-0.123235	0.309472	-0.784451	-0.316281	0.402189	-0.29434	0.393448	0.509681	-0.278636	0.45254	0.590033	-0.0816375	0.31391	0.714548
-4.60482	-0.0217566	-1.37395	-0.604518	-0.801861	-0.284749	-0.369611	-0.947066	-0.489928	-0.803744	-0.386824	-0.239476	-1.10664	0.0697553	-0.626877	-0.61055	-0.414921	-0.396601	-0.0925778	-0.352752	-0.555654	-0.151505	-0.480984	-0.612381	-0.385071	0.357488	-0.525975	0.386228	-0.5383	-0.141039	-0.163454	-0.346342	-0.880518	0.292061	-0.527418	0.0259902	-0.123476	0.310013	-0.78525	-0.315561	0.400393	-0.294499	0.392758	0.510227	-0.279401	0.451561	0.589836	-0.0833191	0.312471	0.714183
-4.60383	-0.0226353	-1.37339	-0.60315	-0.800192	-0.284052	-0.366861	-0.946866	-0.489958	-0.802461	-0.38688	-0.238905	-1.10628	0.0699132	-0.62713	-0.610459	-0.414837	-0.396381	-0.0920832	-0.352322	-0.554655	-0.151764	-0.481137	-0.612164	-0.384337	0.358165	-0.525958	0.387894	-0.537058	-0.139998	-0.163954	-0.343707	-0.880607	0.291471	-0.525929	0.0258093	-0.123717	0.310549	-0.786053	-0.31483	0.398605	-0.294646	0.392071	0.510759	-0.28017	0.450581	0.589627	-0.0850108	0.311036	0.713809
-4.60285	-0.023512	-1.37284	-0.601782	-0.798521	-0.283352	-0.364114	-0.946659	-0.49	-0.801167	-0.386934	-0.238346	-1.10592	0.0700553	-0.627387	-0.610356	-0.414763	-0.396166	-0.091587	-0.3519	-0.55365	-0.152024	-0.481296	-0.611957	-0.383606	0.358838	-0.52594	0.389563	-0.535822	-0.138955	-0.164455	-0.34107	-0.880692	0.290882	-0.524449	0.0256208	-0.123957	0.311081	-0.786859	-0.314089	0.396824	-0.294783	0.391388	0.511277	-0.280942	0.449602	0.589407	-0.0867125	0.309606	0.713428
-4.60187	-0.0243864	-1.3723	-0.600412	-0.796847	-0.28265	-0.36137	-0.946445	-0.490051	-0.799862	-0.386987	-0.2378	-1.10557	0.0701818	-0.627648	-0.610242	-0.4147	-0.395955	-0.0910893	-0.351485	-0.552637	-0.152287	-0.481459	-0.611761	-0.382879	0.359507	-0.525923	0.391234	-0.534592	-0.137907	-0.164957	-0.338432	-0.880773	0.290295	-0.52298	0.0254246	-0.124197	0.311608	-0.78767	-0.313339	0.395051	-0.294908	0.390709	0.511782	-0.281718	0.448622	0.589176	-0.0884237	0.30818	0.713038
-4.60089	-0.0252585	-1.37177	-0.599042	-0.795171	-0.281946	-0.35863	-0.946223	-0.490113	-0.798547	-0.387039	-0.237266	-1.10522	0.0702926	-0.627912	-0.610116	-0.414647	-0.39575	-0.0905901	-0.351078	-0.551618	-0.152552	-0.481628	-0.611575	-0.382155	0.360173	-0.525905	0.392908	-0.533368	-0.136857	-0.165461	-0.335793	-0.88085	0.289709	-0.52152	0.0252208	-0.124437	0.312131	-0.788484	-0.312578	0.393286	-0.295023	0.390034	0.512272	-0.282498	0.447643	0.588934	-0.0901444	0.306759	0.712641
-4.5999	-0.0261282	-1.37124	-0.597671	-0.793493	-0.28124	-0.355892	-0.945994	-0.490186	-0.797221	-0.387089	-0.236745	-1.10488	0.0703878	-0.62818	-0.609979	-0.414605	-0.39555	-0.0900896	-0.350679	-0.550593	-0.152819	-0.481802	-0.6114	-0.381435	0.360835	-0.525888	0.394584	-0.53215	-0.135803	-0.165966	-0.333153	-0.880922	0.289124	-0.52007	0.0250094	-0.124677	0.31265	-0.789303	-0.311808	0.391529	-0.295126	0.389362	0.512748	-0.283282	0.446664	0.58868	-0.0918744	0.305343	0.712236
-4.59892	-0.0269953	-1.37072	-0.596299	-0.791813	-0.280533	-0.353159	-0.945757	-0.490269	-0.795886	-0.387139	-0.236236	-1.10454	0.0704675	-0.628451	-0.60983	-0.414573	-0.395355	-0.0895876	-0.350288	-0.54956	-0.153088	-0.481982	-0.611236	-0.380719	0.361493	-0.525871	0.396263	-0.530939	-0.134746	-0.166473	-0.330512	-0.88099	0.288542	-0.51863	0.0247903	-0.124916	0.313165	-0.790124	-0.311028	0.38978	-0.295218	0.388695	0.513211	-0.284069	0.445685	0.588416	-0.0936133	0.303931	0.711823
-4.59794	-0.0278598	-1.37021	-0.594927	-0.79013	-0.279824	-0.35043	-0.945514	-0.490363	-0.79454	-0.387187	-0.23574	-1.1042	0.0705316	-0.628724	-0.609669	-0.414551	-0.395165	-0.0890844	-0.349905	-0.548522	-0.15336	-0.482166	-0.611082	-0.380007	0.362146	-0.525853	0.397943	-0.529735	-0.133686	-0.16698	-0.32787	-0.881053	0.28796	-0.5172	0.0245635	-0.125154	0.313675	-0.79095	-0.310239	0.38804	-0.2953	0.388031	0.513659	-0.284859	0.444707	0.58814	-0.0953609	0.302525	0.711403
-4.59695	-0.0287216	-1.36971	-0.593554	-0.788446	-0.279114	-0.347706	-0.945263	-0.490468	-0.793185	-0.387234	-0.235257	-1.10386	0.0705801	-0.629001	-0.609497	-0.41454	-0.39498	-0.08858	-0.34953	-0.547477	-0.153634	-0.482356	-0.610939	-0.379299	0.362796	-0.525836	0.399626	-0.528537	-0.132623	-0.167489	-0.325227	-0.881112	0.287381	-0.515781	0.024329	-0.125392	0.314182	-0.791778	-0.30944	0.386308	-0.29537	0.387372	0.514094	-0.285653	0.443729	0.587853	-0.097117	0.301124	0.710975
-4.59597	-0.0295805	-1.36922	-0.592181	-0.786759	-0.278402	-0.344987	-0.945006	-0.490583	-0.79182	-0.38728	-0.234786	-1.10353	0.0706132	-0.629281	-0.609314	-0.414539	-0.3948	-0.0880745	-0.349163	-0.546426	-0.15391	-0.482551	-0.610807	-0.378595	0.363442	-0.52582	0.40131	-0.527346	-0.131557	-0.167999	-0.322585	-0.881167	0.286804	-0.514371	0.0240869	-0.12563	0.314684	-0.792611	-0.308632	0.384586	-0.295429	0.386717	0.514516	-0.286451	0.442751	0.587555	-0.0988815	0.299727	0.710541
-4.59499	-0.0304364	-1.36874	-0.590808	-0.785071	-0.27769	-0.342273	-0.944742	-0.490708	-0.790446	-0.387325	-0.234329	-1.1032	0.0706309	-0.629563	-0.609119	-0.414549	-0.394625	-0.0875678	-0.348804	-0.545369	-0.154188	-0.482752	-0.610686	-0.377895	0.364084	-0.525803	0.402996	-0.526162	-0.130488	-0.168511	-0.319942	-0.881218	0.286228	-0.512971	0.0238371	-0.125867	0.315183	-0.793446	-0.307815	0.382872	-0.295477	0.386067	0.514924	-0.287252	0.441774	0.587246	-0.100654	0.298336	0.710099
-4.594	-0.0312892	-1.36826	-0.589434	-0.783381	-0.276976	-0.339565	-0.944471	-0.490845	-0.789063	-0.38737	-0.233884	-1.10287	0.0706331	-0.629848	-0.608913	-0.414569	-0.394456	-0.0870602	-0.348453	-0.544306	-0.154469	-0.482958	-0.610576	-0.377201	0.364721	-0.525787	0.404684	-0.524984	-0.129417	-0.169023	-0.317299	-0.881265	0.285655	-0.511582	0.0235796	-0.126103	0.315678	-0.794285	-0.306988	0.381168	-0.295514	0.385421	0.515318	-0.288056	0.440798	0.586925	-0.102434	0.29695	0.70965
-4.59302	-0.0321389	-1.3678	-0.58806	-0.781689	-0.276261	-0.336862	-0.944193	-0.490992	-0.78767	-0.387413	-0.233453	-1.10255	0.07062	-0.630135	-0.608695	-0.4146	-0.394292	-0.0865515	-0.34811	-0.543237	-0.154752	-0.483169	-0.610477	-0.37651	0.365354	-0.525772	0.406373	-0.523814	-0.128342	-0.169537	-0.314656	-0.881307	0.285084	-0.510203	0.0233144	-0.126339	0.316169	-0.795127	-0.306153	0.379473	-0.29554	0.38478	0.515699	-0.288863	0.439822	0.586594	-0.104222	0.295569	0.709195
-4.59204	-0.0329852	-1.36734	-0.586685	-0.779995	-0.275546	-0.334166	-0.943909	-0.491149	-0.786269	-0.387455	-0.233035	-1.10223	0.0705916	-0.630424	-0.608466	-0.414642	-0.394133	-0.086042	-0.347776	-0.542164	-0.155037	-0.483385	-0.61039	-0.375825	0.365982	-0.525756	0.408063	-0.522652	-0.127265	-0.170051	-0.312014	-0.881346	0.284515	-0.508834	0.0230416	-0.126574	0.316657	-0.795972	-0.305308	0.377788	-0.295556	0.384144	0.516066	-0.289674	0.438848	0.58625	-0.106017	0.294193	0.708733
-4.59106	-0.0338281	-1.36689	-0.585311	-0.7783	-0.27483	-0.331477	-0.943619	-0.491317	-0.784859	-0.387497	-0.23263	-1.10192	0.0705478	-0.630716	-0.608226	-0.414694	-0.393979	-0.0855316	-0.34745	-0.541084	-0.155324	-0.483607	-0.610313	-0.375144	0.366606	-0.525742	0.409755	-0.521496	-0.126184	-0.170567	-0.309372	-0.88138	0.283949	-0.507476	0.022761	-0.126808	0.317141	-0.79682	-0.304454	0.376113	-0.29556	0.383513	0.51642	-0.290487	0.437874	0.585896	-0.10782	0.292823	0.708264
-4.59007	-0.0346675	-1.36645	-0.583936	-0.776603	-0.274114	-0.328794	-0.943322	-0.491496	-0.78344	-0.387538	-0.232238	-1.10161	0.0704889	-0.631009	-0.607974	-0.414756	-0.393831	-0.0850205	-0.347132	-0.54	-0.155614	-0.483834	-0.610247	-0.374468	0.367226	-0.525727	0.411448	-0.520348	-0.125102	-0.171083	-0.306731	-0.88141	0.283385	-0.506128	0.0224728	-0.127042	0.317622	-0.797671	-0.303592	0.374447	-0.295553	0.382886	0.516761	-0.291304	0.436901	0.585531	-0.109629	0.291459	0.707789
-4.58909	-0.0355033	-1.36602	-0.582561	-0.774905	-0.273397	-0.326119	-0.943019	-0.491685	-0.782014	-0.387578	-0.23186	-1.1013	0.0704147	-0.631305	-0.607711	-0.414829	-0.393688	-0.0845086	-0.346823	-0.53891	-0.155906	-0.484066	-0.610193	-0.373798	0.36784	-0.525714	0.413142	-0.519208	-0.124016	-0.1716	-0.30409	-0.881436	0.282824	-0.50479	0.0221769	-0.127274	0.318099	-0.798525	-0.302721	0.372792	-0.295536	0.382265	0.517088	-0.292124	0.435929	0.585154	-0.111444	0.290099	0.707308
-4.58811	-0.0363352	-1.36559	-0.581186	-0.773206	-0.27268	-0.323451	-0.942709	-0.491885	-0.780579	-0.387617	-0.231495	-1.101	0.0703255	-0.631601	-0.607437	-0.414913	-0.393551	-0.0839961	-0.346522	-0.537816	-0.1562	-0.484304	-0.61015	-0.373133	0.368451	-0.525701	0.414836	-0.518075	-0.122929	-0.172118	-0.301451	-0.881459	0.282265	-0.503463	0.0218734	-0.127506	0.318574	-0.799382	-0.301841	0.371147	-0.295507	0.381649	0.517402	-0.292947	0.434959	0.584766	-0.113266	0.288746	0.706821
-4.58712	-0.0371633	-1.36518	-0.579811	-0.771505	-0.271963	-0.320792	-0.942394	-0.492096	-0.779136	-0.387656	-0.231144	-1.1007	0.0702211	-0.6319	-0.607152	-0.415008	-0.393419	-0.083483	-0.34623	-0.536716	-0.156497	-0.484547	-0.610119	-0.372473	0.369056	-0.525688	0.416532	-0.51695	-0.121838	-0.172637	-0.298813	-0.881477	0.28171	-0.502147	0.0215622	-0.127737	0.319045	-0.800242	-0.300953	0.369513	-0.295468	0.381038	0.517703	-0.293773	0.433989	0.584366	-0.115094	0.287398	0.706328
-4.58614	-0.0379874	-1.36477	-0.578436	-0.769803	-0.271246	-0.31814	-0.942072	-0.492317	-0.777685	-0.387694	-0.230806	-1.1004	0.0701017	-0.6322	-0.606855	-0.415113	-0.393292	-0.0829695	-0.345946	-0.535612	-0.156796	-0.484795	-0.610099	-0.371819	0.369657	-0.525676	0.418227	-0.515833	-0.120746	-0.173156	-0.296176	-0.881491	0.281157	-0.500841	0.0212433	-0.127967	0.319513	-0.801104	-0.300056	0.367889	-0.295417	0.380432	0.517991	-0.294601	0.433021	0.583955	-0.116928	0.286055	0.705829
-4.58516	-0.0388074	-1.36438	-0.577061	-0.7681	-0.270529	-0.315498	-0.941745	-0.492549	-0.776227	-0.387731	-0.230482	-1.10011	0.0699674	-0.632501	-0.606548	-0.415229	-0.393171	-0.0824554	-0.34567	-0.534504	-0.157098	-0.485049	-0.61009	-0.37117	0.370253	-0.525665	0.419924	-0.514724	-0.119651	-0.173677	-0.293541	-0.881502	0.280607	-0.499545	0.0209167	-0.128196	0.319978	-0.801969	-0.299151	0.366277	-0.295356	0.379832	0.518266	-0.295433	0.432054	0.583533	-0.118768	0.284719	0.705324
-4.58417	-0.0396232	-1.36399	-0.575686	-0.766395	-0.269813	-0.312864	-0.941412	-0.492792	-0.774761	-0.387768	-0.230171	-1.09982	0.0698181	-0.632803	-0.606229	-0.415355	-0.393055	-0.081941	-0.345404	-0.533391	-0.157402	-0.485308	-0.610093	-0.370527	0.370844	-0.525655	0.421621	-0.513622	-0.118553	-0.174197	-0.290908	-0.881509	0.28006	-0.49826	0.0205826	-0.128424	0.32044	-0.802836	-0.298238	0.364675	-0.295284	0.379237	0.518528	-0.296267	0.431088	0.583099	-0.120613	0.283388	0.704814
-4.58319	-0.0404347	-1.36361	-0.574311	-0.76469	-0.269097	-0.31024	-0.941073	-0.493045	-0.773288	-0.387804	-0.229875	-1.09954	0.0696539	-0.633106	-0.605899	-0.415492	-0.392945	-0.0814262	-0.345145	-0.532274	-0.157708	-0.485572	-0.610107	-0.36989	0.37143	-0.525646	0.423318	-0.51253	-0.117454	-0.174719	-0.288276	-0.881512	0.279517	-0.496986	0.0202408	-0.128651	0.320899	-0.803706	-0.297317	0.363085	-0.295202	0.378648	0.518777	-0.297104	0.430124	0.582654	-0.122463	0.282063	0.704298
-4.58221	-0.0412417	-1.36324	-0.572936	-0.762984	-0.268381	-0.307625	-0.940728	-0.493309	-0.771808	-0.38784	-0.229591	-1.09926	0.069475	-0.63341	-0.605558	-0.41564	-0.39284	-0.0809112	-0.344896	-0.531153	-0.158016	-0.485841	-0.610133	-0.369259	0.372012	-0.525637	0.425015	-0.511445	-0.116352	-0.17524	-0.285647	-0.881511	0.278977	-0.495722	0.0198913	-0.128876	0.321356	-0.804578	-0.296388	0.361505	-0.295108	0.378064	0.519014	-0.297943	0.429162	0.582198	-0.124318	0.280744	0.703777
-4.58122	-0.0420441	-1.36288	-0.571561	-0.761277	-0.267667	-0.30502	-0.940378	-0.493583	-0.770321	-0.387875	-0.229322	-1.09899	0.0692813	-0.633714	-0.605206	-0.415798	-0.392741	-0.080396	-0.344654	-0.530028	-0.158327	-0.486116	-0.61017	-0.368634	0.372588	-0.525629	0.426712	-0.510369	-0.115249	-0.175763	-0.28302	-0.881506	0.27844	-0.494469	0.0195343	-0.129101	0.32181	-0.805453	-0.295451	0.359938	-0.295004	0.377487	0.519238	-0.298785	0.428201	0.58173	-0.126177	0.279431	0.703251
-4.58024	-0.0428419	-1.36253	-0.570187	-0.759569	-0.266953	-0.302426	-0.940022	-0.493868	-0.768827	-0.38791	-0.229067	-1.09872	0.069073	-0.634019	-0.604844	-0.415967	-0.392647	-0.0798807	-0.344422	-0.528899	-0.15864	-0.486395	-0.610219	-0.368015	0.373159	-0.525623	0.428409	-0.509301	-0.114143	-0.176285	-0.280395	-0.881498	0.277906	-0.493227	0.0191696	-0.129324	0.322261	-0.80633	-0.294506	0.358381	-0.29489	0.376915	0.519449	-0.29963	0.427242	0.581251	-0.128041	0.278124	0.70272
-4.57926	-0.0436349	-1.36219	-0.568813	-0.75786	-0.26624	-0.299842	-0.939661	-0.494164	-0.767327	-0.387944	-0.228825	-1.09845	0.06885	-0.634324	-0.60447	-0.416147	-0.392558	-0.0793653	-0.344198	-0.527766	-0.158956	-0.48668	-0.61028	-0.367403	0.373725	-0.525617	0.430106	-0.508241	-0.113036	-0.176808	-0.277773	-0.881486	0.277377	-0.491996	0.0187974	-0.129547	0.32271	-0.807208	-0.293554	0.356837	-0.294764	0.376349	0.519647	-0.300477	0.426285	0.58076	-0.129909	0.276823	0.702184
-4.57828	-0.0444229	-1.36186	-0.567439	-0.756151	-0.265527	-0.297269	-0.939294	-0.49447	-0.76582	-0.387978	-0.228597	-1.09819	0.0686125	-0.63463	-0.604085	-0.416337	-0.392475	-0.0788498	-0.343983	-0.52663	-0.159274	-0.48697	-0.610352	-0.366797	0.374287	-0.525612	0.431802	-0.507191	-0.111926	-0.177331	-0.275154	-0.881471	0.276851	-0.490775	0.0184176	-0.129768	0.323157	-0.808089	-0.292594	0.355305	-0.294628	0.375789	0.519833	-0.301326	0.42533	0.580257	-0.13178	0.275528	0.701644
-4.57729	-0.045206	-1.36153	-0.566065	-0.754441	-0.264817	-0.294707	-0.938923	-0.494786	-0.764307	-0.388011	-0.228383	-1.09793	0.0683605	-0.634935	-0.60369	-0.416538	-0.392398	-0.0783345	-0.343777	-0.525491	-0.159594	-0.487266	-0.610436	-0.366198	0.374843	-0.525608	0.433498	-0.506149	-0.110815	-0.177854	-0.272537	-0.881452	0.276329	-0.489565	0.0180302	-0.129987	0.323601	-0.808972	-0.291626	0.353784	-0.294482	0.375235	0.520007	-0.302178	0.424376	0.579744	-0.133655	0.27424	0.701099
-4.57631	-0.0459839	-1.36122	-0.564692	-0.75273	-0.264107	-0.292157	-0.938546	-0.495113	-0.762789	-0.388044	-0.228183	-1.09768	0.0680941	-0.635241	-0.603284	-0.416749	-0.392326	-0.0778193	-0.343579	-0.524348	-0.159917	-0.487566	-0.610532	-0.365605	0.375394	-0.525605	0.435193	-0.505116	-0.109702	-0.178377	-0.269924	-0.88143	0.27581	-0.488365	0.0176354	-0.130206	0.324043	-0.809857	-0.290652	0.352276	-0.294325	0.374688	0.520169	-0.303032	0.423425	0.579218	-0.135534	0.272958	0.700549
-4.57533	-0.0467566	-1.36091	-0.563319	-0.751019	-0.263399	-0.289619	-0.938164	-0.495451	-0.761264	-0.388077	-0.227998	-1.09743	0.0678134	-0.635546	-0.602867	-0.416971	-0.392259	-0.0773043	-0.34339	-0.523202	-0.160242	-0.487872	-0.610639	-0.365019	0.37594	-0.525603	0.436887	-0.504092	-0.108587	-0.1789	-0.267313	-0.881404	0.275296	-0.487177	0.0172329	-0.130423	0.324483	-0.810744	-0.28967	0.35078	-0.294158	0.374147	0.520318	-0.303888	0.422476	0.578682	-0.137415	0.271682	0.699995
-4.57434	-0.0475239	-1.36062	-0.561947	-0.749307	-0.262692	-0.287093	-0.937777	-0.495799	-0.759734	-0.388109	-0.227826	-1.09719	0.0675184	-0.635851	-0.602439	-0.417204	-0.392198	-0.0767895	-0.34321	-0.522053	-0.16057	-0.488182	-0.610758	-0.36444	0.37648	-0.525603	0.438581	-0.503076	-0.107471	-0.179423	-0.264707	-0.881375	0.274786	-0.485999	0.016823	-0.130638	0.324921	-0.811632	-0.288681	0.349297	-0.29398	0.373612	0.520455	-0.304746	0.421528	0.578133	-0.139299	0.270412	0.699437
-4.57336	-0.0482857	-1.36033	-0.560575	-0.747596	-0.261987	-0.284579	-0.937385	-0.496158	-0.758199	-0.388142	-0.227668	-1.09695	0.0672092	-0.636156	-0.602001	-0.417447	-0.392143	-0.076275	-0.343039	-0.520902	-0.1609	-0.488498	-0.610889	-0.363868	0.377016	-0.525603	0.440273	-0.50207	-0.106353	-0.179946	-0.262103	-0.881343	0.274279	-0.484832	0.0164056	-0.130853	0.325357	-0.812522	-0.287686	0.347826	-0.293792	0.373083	0.52058	-0.305606	0.420584	0.577573	-0.141186	0.269149	0.698875
-4.57238	-0.0490419	-1.36005	-0.559203	-0.745884	-0.261284	-0.282079	-0.936988	-0.496527	-0.756658	-0.388173	-0.227524	-1.09672	0.0668859	-0.63646	-0.601552	-0.417701	-0.392093	-0.075761	-0.342877	-0.519748	-0.161232	-0.488818	-0.611032	-0.363303	0.377546	-0.525605	0.441965	-0.501073	-0.105234	-0.180469	-0.259504	-0.881307	0.273778	-0.483676	0.0159808	-0.131065	0.325791	-0.813414	-0.286683	0.346368	-0.293593	0.372561	0.520693	-0.306469	0.419641	0.577002	-0.143074	0.267893	0.698309
-4.57139	-0.0497924	-1.35978	-0.557832	-0.744171	-0.260583	-0.279591	-0.936586	-0.496906	-0.755113	-0.388205	-0.227394	-1.09649	0.0665485	-0.636763	-0.601093	-0.417965	-0.392048	-0.0752473	-0.342723	-0.518591	-0.161567	-0.489144	-0.611186	-0.362745	0.378071	-0.525607	0.443655	-0.500086	-0.104113	-0.180992	-0.256908	-0.881268	0.27328	-0.482531	0.0155485	-0.131277	0.326223	-0.814308	-0.285674	0.344923	-0.293385	0.372046	0.520794	-0.307333	0.418701	0.576419	-0.144965	0.266643	0.697739
-4.57041	-0.0505371	-1.35952	-0.556461	-0.742459	-0.259883	-0.277117	-0.93618	-0.497296	-0.753562	-0.388236	-0.227279	-1.09627	0.0661972	-0.637065	-0.600623	-0.41824	-0.392009	-0.0747342	-0.342578	-0.517432	-0.161903	-0.489475	-0.611353	-0.362194	0.378591	-0.525611	0.445343	-0.499107	-0.102991	-0.181514	-0.254317	-0.881226	0.272787	-0.481396	0.0151088	-0.131486	0.326654	-0.815202	-0.284658	0.343491	-0.293166	0.371537	0.520883	-0.308198	0.417763	0.575824	-0.146857	0.265399	0.697166
-4.56943	-0.0512759	-1.35927	-0.555091	-0.740746	-0.259186	-0.274657	-0.935769	-0.497697	-0.752007	-0.388267	-0.227177	-1.09605	0.065832	-0.637366	-0.600142	-0.418525	-0.391975	-0.0742217	-0.342442	-0.51627	-0.162243	-0.48981	-0.611531	-0.361651	0.379106	-0.525617	0.447031	-0.498139	-0.101868	-0.182035	-0.251729	-0.881181	0.272299	-0.480272	0.0146617	-0.131695	0.327083	-0.816099	-0.283636	0.342072	-0.292937	0.371035	0.520961	-0.309066	0.416828	0.575218	-0.148751	0.264163	0.696589
-4.56845	-0.0520086	-1.35903	-0.553721	-0.739034	-0.258491	-0.272211	-0.935353	-0.498107	-0.750447	-0.388298	-0.22709	-1.09583	0.065453	-0.637666	-0.599651	-0.41882	-0.391947	-0.0737098	-0.342315	-0.515107	-0.162584	-0.49015	-0.611721	-0.361116	0.379615	-0.525623	0.448716	-0.497179	-0.100743	-0.182556	-0.249146	-0.881133	0.271815	-0.479159	0.0142072	-0.131901	0.32751	-0.816996	-0.282608	0.340666	-0.292697	0.37054	0.521027	-0.309935	0.415896	0.5746	-0.150646	0.262933	0.696009
-4.56746	-0.0527351	-1.3588	-0.552352	-0.737321	-0.257798	-0.26978	-0.934933	-0.498529	-0.748883	-0.388329	-0.227017	-1.09562	0.0650602	-0.637965	-0.59915	-0.419127	-0.391924	-0.0731987	-0.342196	-0.513941	-0.162928	-0.490496	-0.611922	-0.360588	0.380119	-0.525631	0.4504	-0.496229	-0.0996178	-0.183077	-0.246568	-0.881082	0.271336	-0.478057	0.0137454	-0.132106	0.327936	-0.817895	-0.281573	0.339273	-0.292448	0.370051	0.521082	-0.310806	0.414966	0.57397	-0.152542	0.26171	0.695425
-4.56648	-0.0534554	-1.35858	-0.550983	-0.735609	-0.257108	-0.267363	-0.934509	-0.49896	-0.747315	-0.388359	-0.226958	-1.09542	0.0646539	-0.638262	-0.598638	-0.419443	-0.391906	-0.0726883	-0.342087	-0.512774	-0.163275	-0.490846	-0.612136	-0.360067	0.380618	-0.52564	0.452082	-0.495289	-0.0984912	-0.183597	-0.243994	-0.881027	0.270861	-0.476966	0.0132763	-0.13231	0.32836	-0.818795	-0.280532	0.337894	-0.292189	0.36957	0.521125	-0.311679	0.414039	0.573329	-0.154438	0.260494	0.694839
-4.5655	-0.0541692	-1.35836	-0.549616	-0.733897	-0.25642	-0.264962	-0.93408	-0.499402	-0.745743	-0.388389	-0.226913	-1.09522	0.0642339	-0.638557	-0.598117	-0.41977	-0.391894	-0.0721787	-0.341986	-0.511605	-0.163624	-0.4912	-0.612361	-0.359555	0.381112	-0.525651	0.453762	-0.494359	-0.0973635	-0.184116	-0.241425	-0.88097	0.270392	-0.475885	0.0127999	-0.132511	0.328784	-0.819696	-0.279486	0.336528	-0.29192	0.369095	0.521157	-0.312553	0.413115	0.572676	-0.156335	0.259284	0.694249
-4.56451	-0.0548766	-1.35816	-0.548248	-0.732185	-0.255735	-0.262576	-0.933647	-0.499853	-0.744167	-0.388419	-0.226882	-1.09503	0.0638006	-0.638851	-0.597584	-0.420107	-0.391888	-0.0716701	-0.341894	-0.510434	-0.163975	-0.49156	-0.612598	-0.35905	0.381601	-0.525663	0.455439	-0.493438	-0.0962349	-0.184634	-0.238861	-0.88091	0.269928	-0.474815	0.0123163	-0.132711	0.329206	-0.820598	-0.278434	0.335176	-0.291641	0.368628	0.521178	-0.313428	0.412194	0.572011	-0.158231	0.258082	0.693657
-4.56353	-0.0555773	-1.35796	-0.546882	-0.730474	-0.255053	-0.260205	-0.93321	-0.500316	-0.742588	-0.388449	-0.226865	-1.09484	0.0633538	-0.639143	-0.597042	-0.420454	-0.391886	-0.0711624	-0.341811	-0.509262	-0.164328	-0.491924	-0.612847	-0.358553	0.382084	-0.525676	0.457115	-0.492527	-0.0951055	-0.185151	-0.236302	-0.880848	0.269468	-0.473756	0.0118255	-0.132909	0.329626	-0.821501	-0.277376	0.333838	-0.291353	0.368167	0.521187	-0.314304	0.411276	0.571335	-0.160128	0.256886	0.693061
-4.56255	-0.0562713	-1.35778	-0.545516	-0.728762	-0.254373	-0.257851	-0.932769	-0.500788	-0.741005	-0.388479	-0.226863	-1.09466	0.0628937	-0.639433	-0.596489	-0.420812	-0.39189	-0.0706557	-0.341737	-0.508089	-0.164683	-0.492292	-0.613108	-0.358065	0.382562	-0.52569	0.458788	-0.491627	-0.0939752	-0.185667	-0.233748	-0.880782	0.269014	-0.472708	0.0113274	-0.133106	0.330046	-0.822405	-0.276312	0.332513	-0.291054	0.367714	0.521186	-0.315182	0.410361	0.570646	-0.162024	0.255698	0.692463
-4.56156	-0.0569585	-1.3576	-0.54415	-0.727052	-0.253697	-0.255513	-0.932323	-0.50127	-0.739419	-0.388509	-0.226874	-1.09448	0.0624204	-0.639721	-0.595927	-0.42118	-0.3919	-0.0701501	-0.341671	-0.506915	-0.165041	-0.492665	-0.613381	-0.357584	0.383035	-0.525707	0.460458	-0.490736	-0.0928443	-0.186182	-0.2312	-0.880714	0.268565	-0.47167	0.0108222	-0.1333	0.330465	-0.82331	-0.275243	0.331203	-0.290746	0.367268	0.521173	-0.316061	0.409449	0.569946	-0.163919	0.254517	0.691863
-4.56058	-0.0576387	-1.35743	-0.542786	-0.725341	-0.253023	-0.253191	-0.931874	-0.501763	-0.73783	-0.388538	-0.2269	-1.0943	0.061934	-0.640006	-0.595354	-0.421558	-0.391914	-0.0696457	-0.341615	-0.505739	-0.165402	-0.493043	-0.613665	-0.357112	0.383503	-0.525724	0.462126	-0.489855	-0.0917127	-0.186696	-0.228658	-0.880643	0.268122	-0.470643	0.0103099	-0.133493	0.330883	-0.824216	-0.274169	0.329906	-0.290429	0.36683	0.52115	-0.316941	0.40854	0.569235	-0.165813	0.253343	0.69126
-4.5596	-0.0583118	-1.35727	-0.541422	-0.723632	-0.252353	-0.250886	-0.931421	-0.502266	-0.736238	-0.388567	-0.22694	-1.09414	0.0614346	-0.640289	-0.594772	-0.421947	-0.391934	-0.0691425	-0.341567	-0.504563	-0.165764	-0.493425	-0.613961	-0.356648	0.383965	-0.525743	0.463791	-0.488985	-0.0905805	-0.187208	-0.226121	-0.88057	0.267684	-0.469627	0.00979047	-0.133684	0.3313	-0.825122	-0.27309	0.328624	-0.290102	0.366398	0.521116	-0.317822	0.407634	0.568511	-0.167705	0.252176	0.690656
-4.55862	-0.0589778	-1.35712	-0.540059	-0.721923	-0.251686	-0.248599	-0.930964	-0.502778	-0.734643	-0.388596	-0.226994	-1.09397	0.0609222	-0.64057	-0.594179	-0.422345	-0.391959	-0.0686406	-0.341528	-0.503386	-0.166129	-0.493812	-0.614269	-0.356193	0.384423	-0.525764	0.465454	-0.488124	-0.0894478	-0.187719	-0.22359	-0.880494	0.267252	-0.468622	0.009264	-0.133873	0.331716	-0.826029	-0.272006	0.327356	-0.289765	0.365974	0.521072	-0.318704	0.406732	0.567776	-0.169596	0.251016	0.690049
-4.55763	-0.0596365	-1.35698	-0.538696	-0.720214	-0.251022	-0.246329	-0.930503	-0.503301	-0.733046	-0.388625	-0.227061	-1.09382	0.060397	-0.640848	-0.593577	-0.422753	-0.39199	-0.0681401	-0.341498	-0.502208	-0.166496	-0.494203	-0.614589	-0.355746	0.384875	-0.525786	0.467113	-0.487274	-0.0883147	-0.188229	-0.221065	-0.880415	0.266825	-0.467627	0.00873053	-0.134061	0.332132	-0.826937	-0.270917	0.326102	-0.28942	0.365558	0.521017	-0.319587	0.405833	0.567029	-0.171485	0.249864	0.68944
-4.55665	-0.0602878	-1.35685	-0.537335	-0.718507	-0.250362	-0.244077	-0.930038	-0.503834	-0.731447	-0.388654	-0.227143	-1.09366	0.0598591	-0.641123	-0.592964	-0.423172	-0.392025	-0.0676409	-0.341476	-0.50103	-0.166865	-0.494598	-0.61492	-0.355308	0.385322	-0.525809	0.468769	-0.486435	-0.0871812	-0.188737	-0.218546	-0.880334	0.266404	-0.466643	0.00819008	-0.134246	0.332547	-0.827845	-0.269823	0.324862	-0.289065	0.365149	0.520951	-0.32047	0.404938	0.56627	-0.173372	0.248719	0.688829
-4.55567	-0.0609316	-1.35673	-0.535974	-0.7168	-0.249705	-0.241843	-0.92957	-0.504377	-0.729846	-0.388683	-0.22724	-1.09352	0.0593085	-0.641395	-0.592342	-0.4236	-0.392066	-0.0671433	-0.341463	-0.499851	-0.167236	-0.494997	-0.615263	-0.354878	0.385765	-0.525835	0.470422	-0.485605	-0.0860475	-0.189243	-0.216034	-0.880251	0.265988	-0.465669	0.00764269	-0.134429	0.332961	-0.828753	-0.268725	0.323637	-0.2887	0.364748	0.520876	-0.321355	0.404046	0.565499	-0.175257	0.247581	0.688216
-4.55468	-0.0615677	-1.35662	-0.534614	-0.715094	-0.249052	-0.239627	-0.929098	-0.504929	-0.728243	-0.388712	-0.22735	-1.09338	0.0587453	-0.641664	-0.59171	-0.424039	-0.392112	-0.0666471	-0.341459	-0.498672	-0.16761	-0.495401	-0.615618	-0.354457	0.386202	-0.525861	0.472072	-0.484787	-0.0849134	-0.189747	-0.213528	-0.880166	0.265579	-0.464707	0.0070884	-0.134611	0.333375	-0.829662	-0.267622	0.322426	-0.288327	0.364354	0.52079	-0.322239	0.403158	0.564716	-0.177138	0.246451	0.687602
-4.5537	-0.0621962	-1.35651	-0.533255	-0.713389	-0.248402	-0.23743	-0.928623	-0.505492	-0.726637	-0.38874	-0.227474	-1.09324	0.0581697	-0.64193	-0.591069	-0.424487	-0.392163	-0.0661526	-0.341464	-0.497494	-0.167986	-0.495809	-0.615985	-0.354045	0.386634	-0.52589	0.473718	-0.483978	-0.0837793	-0.19025	-0.211029	-0.880078	0.265175	-0.463754	0.00652727	-0.13479	0.333789	-0.830571	-0.266515	0.32123	-0.287945	0.363968	0.520694	-0.323125	0.402274	0.563921	-0.179017	0.245329	0.686986
-4.55272	-0.0628168	-1.35642	-0.531896	-0.711685	-0.247757	-0.235252	-0.928144	-0.506064	-0.725031	-0.388769	-0.227612	-1.09311	0.0575817	-0.642192	-0.590418	-0.424945	-0.392219	-0.0656598	-0.341478	-0.496315	-0.168364	-0.496221	-0.616363	-0.353642	0.387061	-0.525919	0.475361	-0.483181	-0.082645	-0.190751	-0.208536	-0.879989	0.264778	-0.462812	0.00595932	-0.134967	0.334202	-0.83148	-0.265404	0.320048	-0.287553	0.363589	0.520588	-0.32401	0.401393	0.563115	-0.180892	0.244214	0.686369
-4.55173	-0.0634294	-1.35633	-0.530539	-0.709983	-0.247115	-0.233094	-0.927662	-0.506646	-0.723423	-0.388797	-0.227764	-1.09299	0.0569815	-0.642451	-0.589757	-0.425413	-0.39228	-0.0651686	-0.3415	-0.495136	-0.168744	-0.496636	-0.616752	-0.353248	0.387484	-0.525951	0.477	-0.482393	-0.0815108	-0.191249	-0.20605	-0.879897	0.264387	-0.461881	0.0053846	-0.135142	0.334616	-0.832389	-0.264288	0.318882	-0.287153	0.363219	0.520473	-0.324896	0.400516	0.562296	-0.182764	0.243106	0.685751
-4.55075	-0.0640341	-1.35626	-0.529182	-0.708281	-0.246477	-0.230954	-0.927176	-0.507238	-0.721814	-0.388825	-0.22793	-1.09287	0.0563691	-0.642707	-0.589087	-0.42589	-0.392346	-0.0646793	-0.34153	-0.493958	-0.169126	-0.497056	-0.617154	-0.352863	0.387901	-0.525984	0.478635	-0.481617	-0.0803765	-0.191746	-0.203571	-0.879803	0.264002	-0.46096	0.00480316	-0.135316	0.335029	-0.833299	-0.263169	0.31773	-0.286744	0.362856	0.520348	-0.325783	0.399643	0.561466	-0.184632	0.242006	0.685131
-4.54977	-0.0646306	-1.35619	-0.527826	-0.706581	-0.245844	-0.228835	-0.926687	-0.507839	-0.720204	-0.388853	-0.228109	-1.09275	0.0557447	-0.642959	-0.588408	-0.426377	-0.392417	-0.0641918	-0.34157	-0.49278	-0.16951	-0.49748	-0.617567	-0.352487	0.388314	-0.526019	0.480266	-0.480851	-0.0792425	-0.19224	-0.2011	-0.879707	0.263623	-0.46005	0.00421504	-0.135487	0.335442	-0.834208	-0.262047	0.316592	-0.286327	0.362501	0.520213	-0.326669	0.398774	0.560624	-0.186496	0.240914	0.684511
-4.54878	-0.0652188	-1.35613	-0.526471	-0.704881	-0.245214	-0.226736	-0.926195	-0.508451	-0.718593	-0.388881	-0.228303	-1.09264	0.0551083	-0.643207	-0.587719	-0.426874	-0.392493	-0.0637063	-0.341618	-0.491602	-0.169897	-0.497907	-0.617991	-0.35212	0.388722	-0.526055	0.481893	-0.480096	-0.0781086	-0.192731	-0.198635	-0.879609	0.26325	-0.45915	0.00362029	-0.135656	0.335855	-0.835118	-0.26092	0.31547	-0.2859	0.362153	0.520068	-0.327556	0.39791	0.559769	-0.188355	0.23983	0.683889
-4.5478	-0.0657986	-1.35608	-0.525117	-0.703184	-0.244589	-0.224657	-0.9257	-0.509071	-0.716981	-0.388909	-0.22851	-1.09254	0.0544601	-0.643451	-0.587021	-0.427381	-0.392573	-0.0632227	-0.341674	-0.490425	-0.170286	-0.498338	-0.618427	-0.351762	0.389125	-0.526093	0.483516	-0.479352	-0.0769749	-0.19322	-0.196178	-0.879509	0.262884	-0.45826	0.00301895	-0.135823	0.336268	-0.836027	-0.259791	0.314363	-0.285466	0.361814	0.519915	-0.328442	0.397049	0.558903	-0.19021	0.238753	0.683267
-4.54682	-0.06637	-1.35604	-0.523764	-0.701487	-0.243968	-0.222598	-0.925202	-0.509702	-0.715369	-0.388936	-0.228731	-1.09244	0.0538001	-0.643691	-0.586313	-0.427896	-0.392659	-0.0627412	-0.341739	-0.489249	-0.170676	-0.498773	-0.618874	-0.351414	0.389523	-0.526133	0.485134	-0.478619	-0.0758417	-0.193707	-0.193729	-0.879408	0.262525	-0.457381	0.00241108	-0.135988	0.336682	-0.836936	-0.258658	0.31327	-0.285022	0.361483	0.519752	-0.329329	0.396192	0.558025	-0.192059	0.237684	0.682644
-4.54584	-0.0669329	-1.35601	-0.522411	-0.699792	-0.243352	-0.220561	-0.924701	-0.510341	-0.713756	-0.388964	-0.228966	-1.09235	0.0531284	-0.643927	-0.585596	-0.428422	-0.392749	-0.0622618	-0.341813	-0.488074	-0.171069	-0.499211	-0.619333	-0.351075	0.389917	-0.526175	0.486749	-0.477897	-0.0747088	-0.194191	-0.191287	-0.879304	0.262172	-0.456512	0.00179672	-0.13615	0.337095	-0.837845	-0.257522	0.312193	-0.284571	0.36116	0.519579	-0.330215	0.39534	0.557134	-0.193903	0.236623	0.68202
-4.54485	-0.067487	-1.35598	-0.52106	-0.698099	-0.24274	-0.218545	-0.924196	-0.510991	-0.712144	-0.388991	-0.229215	-1.09226	0.0524453	-0.644159	-0.584871	-0.428956	-0.392845	-0.0617845	-0.341895	-0.4869	-0.171464	-0.499653	-0.619803	-0.350746	0.390307	-0.526218	0.488358	-0.477186	-0.0735764	-0.194672	-0.188853	-0.879199	0.261825	-0.455653	0.00117593	-0.136311	0.337509	-0.838753	-0.256382	0.31113	-0.284111	0.360845	0.519398	-0.331101	0.394492	0.556232	-0.195742	0.23557	0.681396
-4.54387	-0.0680324	-1.35597	-0.519709	-0.696407	-0.242132	-0.21655	-0.923689	-0.511649	-0.710531	-0.389018	-0.229477	-1.09218	0.0517506	-0.644386	-0.584136	-0.4295	-0.392945	-0.0613095	-0.341986	-0.485727	-0.17186	-0.500098	-0.620284	-0.350426	0.390691	-0.526263	0.489963	-0.476485	-0.0724445	-0.19515	-0.186427	-0.879093	0.261486	-0.454805	0.000548762	-0.136469	0.337923	-0.839662	-0.25524	0.310083	-0.283643	0.360538	0.519208	-0.331987	0.393648	0.555318	-0.197575	0.234525	0.680772
-4.54289	-0.068569	-1.35596	-0.518359	-0.694717	-0.241529	-0.214577	-0.923179	-0.512317	-0.708919	-0.389045	-0.229753	-1.09211	0.0510447	-0.644609	-0.583392	-0.430054	-0.393049	-0.0608368	-0.342085	-0.484556	-0.172259	-0.500547	-0.620777	-0.350116	0.391072	-0.526309	0.491564	-0.475796	-0.0713133	-0.195625	-0.184009	-0.878985	0.261153	-0.453966	-8.47409e-05	-0.136625	0.338338	-0.840569	-0.254096	0.309051	-0.283168	0.360239	0.51901	-0.332873	0.392809	0.554391	-0.199402	0.233488	0.680148
-4.5419	-0.0690965	-1.35597	-0.517011	-0.693028	-0.240931	-0.212626	-0.922666	-0.512995	-0.707307	-0.389072	-0.230042	-1.09204	0.0503276	-0.644827	-0.582639	-0.430616	-0.393158	-0.0603664	-0.342192	-0.483386	-0.17266	-0.500999	-0.621281	-0.349816	0.391448	-0.526358	0.493159	-0.475118	-0.0701827	-0.196097	-0.181599	-0.878875	0.260827	-0.453138	-0.000724519	-0.136779	0.338753	-0.841477	-0.252949	0.308034	-0.282684	0.359948	0.518802	-0.333758	0.391974	0.553453	-0.201222	0.232458	0.679523
-4.54092	-0.069615	-1.35598	-0.515663	-0.691341	-0.240338	-0.210697	-0.922151	-0.513681	-0.705696	-0.389098	-0.230345	-1.09197	0.0495993	-0.64504	-0.581878	-0.431187	-0.393272	-0.0598984	-0.342308	-0.482217	-0.173062	-0.501454	-0.621796	-0.349525	0.391819	-0.526408	0.49475	-0.474451	-0.0690529	-0.196566	-0.179198	-0.878764	0.260508	-0.45232	-0.00137052	-0.13693	0.339169	-0.842383	-0.251799	0.307032	-0.282192	0.359665	0.518586	-0.334642	0.391143	0.552502	-0.203036	0.231437	0.678898
-4.53994	-0.0701243	-1.356	-0.514316	-0.689656	-0.23975	-0.20879	-0.921632	-0.514377	-0.704085	-0.389125	-0.230661	-1.09192	0.04886	-0.645249	-0.581107	-0.431768	-0.393391	-0.0594329	-0.342432	-0.48105	-0.173467	-0.501912	-0.622322	-0.349244	0.392186	-0.52646	0.496335	-0.473795	-0.067924	-0.197031	-0.176804	-0.878651	0.260196	-0.451512	-0.00202268	-0.137079	0.339586	-0.843289	-0.250647	0.306046	-0.281693	0.359391	0.518362	-0.335525	0.390318	0.55154	-0.204843	0.230424	0.678273
-4.53895	-0.0706243	-1.35603	-0.51297	-0.687973	-0.239166	-0.206907	-0.921111	-0.515082	-0.702476	-0.389151	-0.23099	-1.09186	0.0481099	-0.645452	-0.580328	-0.432358	-0.393513	-0.05897	-0.342564	-0.479885	-0.173873	-0.502373	-0.622859	-0.348973	0.39255	-0.526513	0.497916	-0.47315	-0.0667959	-0.197493	-0.17442	-0.878537	0.259891	-0.450714	-0.00268096	-0.137226	0.340003	-0.844195	-0.249493	0.305074	-0.281186	0.359124	0.51813	-0.336408	0.389497	0.550565	-0.206642	0.229419	0.677649
-4.53797	-0.071115	-1.35607	-0.511624	-0.686292	-0.238588	-0.205046	-0.920588	-0.515796	-0.700867	-0.389177	-0.231333	-1.09182	0.0473489	-0.645651	-0.57954	-0.432956	-0.393641	-0.0585096	-0.342705	-0.478722	-0.174281	-0.502837	-0.623408	-0.348712	0.392909	-0.526569	0.499491	-0.472517	-0.0656688	-0.197952	-0.172044	-0.878422	0.259593	-0.449925	-0.00334528	-0.137371	0.340422	-0.845099	-0.248337	0.304118	-0.280671	0.358866	0.517889	-0.33729	0.38868	0.549578	-0.208434	0.228422	0.677024
-4.53699	-0.0715963	-1.35611	-0.51028	-0.684613	-0.238015	-0.203208	-0.920061	-0.516519	-0.69926	-0.389202	-0.231689	-1.09177	0.0465773	-0.645844	-0.578743	-0.433563	-0.393772	-0.0580519	-0.342854	-0.47756	-0.174691	-0.503305	-0.623967	-0.348461	0.393264	-0.526626	0.50106	-0.471894	-0.0645428	-0.198406	-0.169676	-0.878306	0.259303	-0.449147	-0.00401559	-0.137514	0.340841	-0.846003	-0.24718	0.303178	-0.280149	0.358617	0.51764	-0.338171	0.387869	0.54858	-0.210218	0.227434	0.6764
-4.53601	-0.0720679	-1.35617	-0.508937	-0.682936	-0.237446	-0.201394	-0.919533	-0.517251	-0.697655	-0.389227	-0.232058	-1.09174	0.0457951	-0.646032	-0.577938	-0.434179	-0.393908	-0.0575969	-0.343011	-0.476401	-0.175103	-0.503774	-0.624537	-0.348219	0.393614	-0.526685	0.502624	-0.471283	-0.0634179	-0.198857	-0.167318	-0.878188	0.259019	-0.448378	-0.00469184	-0.137654	0.341261	-0.846906	-0.24602	0.302252	-0.27962	0.358376	0.517384	-0.339051	0.387062	0.547568	-0.211994	0.226453	0.675777
-4.53502	-0.07253	-1.35623	-0.507595	-0.681261	-0.236883	-0.199604	-0.919002	-0.517991	-0.69605	-0.389252	-0.232441	-1.09171	0.0450025	-0.646215	-0.577125	-0.434804	-0.394049	-0.0571447	-0.343176	-0.475244	-0.175517	-0.504247	-0.625118	-0.347988	0.393962	-0.526746	0.504183	-0.470684	-0.0622941	-0.199304	-0.164969	-0.87807	0.258743	-0.447619	-0.00537396	-0.137792	0.341682	-0.847808	-0.244859	0.301342	-0.279084	0.358143	0.517119	-0.33993	0.386261	0.546545	-0.213762	0.225481	0.675154
-4.53404	-0.0729822	-1.3563	-0.506253	-0.679589	-0.236326	-0.197838	-0.918468	-0.518741	-0.694448	-0.389277	-0.232836	-1.09168	0.0441996	-0.646392	-0.576303	-0.435437	-0.394193	-0.0566954	-0.343349	-0.474089	-0.175932	-0.504722	-0.62571	-0.347767	0.394305	-0.526808	0.505736	-0.470095	-0.0611716	-0.199747	-0.162628	-0.87795	0.258475	-0.44687	-0.00606188	-0.137927	0.342104	-0.848709	-0.243697	0.300448	-0.27854	0.357918	0.516847	-0.340807	0.385464	0.54551	-0.215521	0.224517	0.674532
-4.53306	-0.0734247	-1.35638	-0.504913	-0.677918	-0.235773	-0.196096	-0.917932	-0.5195	-0.692848	-0.389301	-0.233244	-1.09166	0.0433864	-0.646564	-0.575473	-0.436079	-0.394342	-0.0562489	-0.34353	-0.472937	-0.176349	-0.5052	-0.626313	-0.347556	0.394644	-0.526873	0.507283	-0.469518	-0.0600504	-0.200186	-0.160297	-0.877829	0.258214	-0.44613	-0.00675555	-0.13806	0.342527	-0.849609	-0.242534	0.299568	-0.27799	0.357702	0.516568	-0.341684	0.384672	0.544463	-0.217271	0.223562	0.67391
-4.53207	-0.0738572	-1.35647	-0.503573	-0.67625	-0.235226	-0.194378	-0.917394	-0.520267	-0.69125	-0.389325	-0.233666	-1.09165	0.0425631	-0.646729	-0.574634	-0.43673	-0.394495	-0.0558054	-0.343719	-0.471788	-0.176768	-0.505681	-0.626926	-0.347355	0.39498	-0.526939	0.508824	-0.468953	-0.0589306	-0.20062	-0.157975	-0.877708	0.25796	-0.4454	-0.00745491	-0.138191	0.342952	-0.850508	-0.241369	0.298704	-0.277432	0.357494	0.516281	-0.342558	0.383886	0.543403	-0.219012	0.222615	0.67329
-4.53109	-0.0742798	-1.35657	-0.502235	-0.674584	-0.234685	-0.192685	-0.916853	-0.521043	-0.689654	-0.389349	-0.2341	-1.09164	0.0417298	-0.646889	-0.573787	-0.437388	-0.394652	-0.0553648	-0.343916	-0.470641	-0.177189	-0.506163	-0.62755	-0.347165	0.395313	-0.527007	0.510359	-0.468398	-0.0578123	-0.20105	-0.155663	-0.877585	0.257714	-0.444679	-0.00815988	-0.138319	0.343378	-0.851406	-0.240204	0.297855	-0.276868	0.357295	0.515987	-0.343432	0.383104	0.542331	-0.220744	0.221676	0.67267
-4.53011	-0.0746922	-1.35667	-0.500897	-0.672921	-0.234149	-0.191017	-0.916311	-0.521827	-0.68806	-0.389372	-0.234547	-1.09164	0.0408866	-0.647044	-0.572932	-0.438055	-0.394813	-0.0549274	-0.344121	-0.469497	-0.177611	-0.506648	-0.628184	-0.346985	0.395642	-0.527077	0.511888	-0.467855	-0.0566955	-0.201476	-0.153359	-0.877462	0.257475	-0.443968	-0.0088704	-0.138446	0.343805	-0.852303	-0.239038	0.297022	-0.276298	0.357104	0.515686	-0.344304	0.382328	0.541247	-0.222465	0.220746	0.672051
-4.52912	-0.0750944	-1.35678	-0.49956	-0.67126	-0.233618	-0.189373	-0.915766	-0.522621	-0.68647	-0.389395	-0.235006	-1.09164	0.0400337	-0.647192	-0.572069	-0.438731	-0.394978	-0.0544931	-0.344333	-0.468355	-0.178035	-0.507136	-0.628829	-0.346815	0.395967	-0.527148	0.51341	-0.467324	-0.0555803	-0.201897	-0.151066	-0.877338	0.257244	-0.443266	-0.00958641	-0.138569	0.344234	-0.853198	-0.237871	0.296204	-0.27572	0.356921	0.515377	-0.345174	0.381557	0.540151	-0.224177	0.219824	0.671434
-4.52814	-0.0754864	-1.3569	-0.498224	-0.669602	-0.233093	-0.187756	-0.915219	-0.523422	-0.684882	-0.389418	-0.235479	-1.09165	0.0391711	-0.647334	-0.571198	-0.439414	-0.395146	-0.054062	-0.344554	-0.467217	-0.17846	-0.507625	-0.629484	-0.346655	0.396289	-0.527222	0.514927	-0.466804	-0.0544667	-0.202313	-0.148782	-0.877213	0.257021	-0.442573	-0.0103078	-0.138691	0.344664	-0.854092	-0.236704	0.295402	-0.275137	0.356747	0.515062	-0.346042	0.380791	0.539043	-0.225878	0.218911	0.670818
-4.52716	-0.075868	-1.35703	-0.49689	-0.667947	-0.232574	-0.186163	-0.91467	-0.524232	-0.683297	-0.38944	-0.235963	-1.09166	0.038299	-0.64747	-0.570319	-0.440106	-0.395319	-0.0536341	-0.344782	-0.466082	-0.178887	-0.508116	-0.630149	-0.346506	0.396608	-0.527297	0.516437	-0.466296	-0.0533549	-0.202725	-0.146508	-0.877088	0.256806	-0.44189	-0.0110346	-0.13881	0.345096	-0.854985	-0.235536	0.294614	-0.274547	0.356582	0.514741	-0.346908	0.380031	0.537922	-0.227569	0.218006	0.670203
-4.52617	-0.0762392	-1.35717	-0.495556	-0.666294	-0.23206	-0.184597	-0.914119	-0.52505	-0.681715	-0.389461	-0.23646	-1.09168	0.0374174	-0.647599	-0.569433	-0.440805	-0.395495	-0.0532095	-0.345018	-0.46495	-0.179315	-0.508609	-0.630825	-0.346368	0.396924	-0.527374	0.51794	-0.465798	-0.0522449	-0.203131	-0.144244	-0.876962	0.256598	-0.441216	-0.0117667	-0.138926	0.345529	-0.855877	-0.234369	0.293842	-0.273951	0.356425	0.514412	-0.347773	0.379276	0.536789	-0.229249	0.217109	0.669589
-4.52519	-0.0765998	-1.35731	-0.494223	-0.664644	-0.231553	-0.183056	-0.913565	-0.525877	-0.680136	-0.389482	-0.23697	-1.0917	0.0365266	-0.647723	-0.568538	-0.441513	-0.395676	-0.0527883	-0.345261	-0.463822	-0.179745	-0.509105	-0.631511	-0.346239	0.397237	-0.527453	0.519437	-0.465313	-0.0511368	-0.203533	-0.14199	-0.876836	0.256399	-0.440551	-0.0125039	-0.139041	0.345964	-0.856767	-0.233201	0.293086	-0.273348	0.356277	0.514078	-0.348635	0.378526	0.535644	-0.230918	0.216221	0.668977
-4.52421	-0.0769499	-1.35747	-0.49289	-0.662996	-0.231051	-0.181542	-0.91301	-0.526712	-0.678561	-0.389503	-0.237492	-1.09173	0.0356265	-0.647839	-0.567636	-0.442228	-0.395859	-0.0523705	-0.345512	-0.462696	-0.180177	-0.509601	-0.632207	-0.346122	0.397547	-0.527534	0.520927	-0.464839	-0.0500306	-0.203929	-0.139746	-0.876709	0.256207	-0.439894	-0.0132463	-0.139153	0.346401	-0.857655	-0.232034	0.292344	-0.27274	0.356137	0.513737	-0.349495	0.377782	0.534487	-0.232575	0.215342	0.668366
-4.52323	-0.0772892	-1.35763	-0.491559	-0.661352	-0.230555	-0.180054	-0.912453	-0.527555	-0.67699	-0.389522	-0.238026	-1.09177	0.0347174	-0.64795	-0.566726	-0.442951	-0.396047	-0.0519562	-0.34577	-0.461575	-0.180609	-0.5101	-0.632913	-0.346015	0.397854	-0.527617	0.522411	-0.464376	-0.0489264	-0.20432	-0.137512	-0.876581	0.256023	-0.439247	-0.0139938	-0.139262	0.34684	-0.858542	-0.230867	0.291618	-0.272126	0.356005	0.513389	-0.350353	0.377044	0.533318	-0.234221	0.214472	0.667757
-4.52224	-0.0776178	-1.3578	-0.490229	-0.65971	-0.230065	-0.178592	-0.911894	-0.528406	-0.675422	-0.389542	-0.238572	-1.09181	0.0337994	-0.648053	-0.565808	-0.443681	-0.396238	-0.0515454	-0.346036	-0.460457	-0.181043	-0.5106	-0.633629	-0.345918	0.398159	-0.527701	0.523887	-0.463925	-0.0478243	-0.204706	-0.135289	-0.876454	0.255847	-0.438609	-0.0147462	-0.139369	0.34728	-0.859427	-0.2297	0.290907	-0.271507	0.355883	0.513036	-0.351209	0.376311	0.532136	-0.235855	0.21361	0.66715
-4.52126	-0.0779355	-1.35797	-0.4889	-0.658072	-0.22958	-0.177157	-0.911333	-0.529266	-0.673859	-0.389561	-0.23913	-1.09186	0.0328724	-0.64815	-0.564883	-0.44442	-0.396432	-0.0511381	-0.346309	-0.459343	-0.181479	-0.511101	-0.634354	-0.345832	0.398461	-0.527788	0.525357	-0.463485	-0.0467243	-0.205086	-0.133075	-0.876326	0.25568	-0.437979	-0.0155036	-0.139474	0.347723	-0.860311	-0.228534	0.290212	-0.270881	0.355768	0.512677	-0.352062	0.375584	0.530942	-0.237477	0.212756	0.666545
-4.52028	-0.0782424	-1.35815	-0.487571	-0.656436	-0.229102	-0.17575	-0.910771	-0.530133	-0.672299	-0.389579	-0.2397	-1.09191	0.0319368	-0.648241	-0.563951	-0.445165	-0.39663	-0.0507345	-0.34659	-0.458232	-0.181916	-0.511604	-0.63509	-0.345757	0.39876	-0.527876	0.526819	-0.463057	-0.0456266	-0.20546	-0.130872	-0.876197	0.25552	-0.437358	-0.0162658	-0.139576	0.348167	-0.861193	-0.227369	0.289531	-0.270251	0.355663	0.512312	-0.352913	0.374863	0.529736	-0.239086	0.211912	0.665941
-4.51929	-0.0785382	-1.35835	-0.486244	-0.654804	-0.22863	-0.174369	-0.910206	-0.531008	-0.670744	-0.389596	-0.240282	-1.09197	0.0309926	-0.648324	-0.563011	-0.445918	-0.396831	-0.0503347	-0.346878	-0.457126	-0.182354	-0.512108	-0.635835	-0.345692	0.399057	-0.527966	0.528275	-0.462641	-0.0445311	-0.205828	-0.12868	-0.876069	0.255368	-0.436746	-0.0170328	-0.139676	0.348614	-0.862073	-0.226205	0.288866	-0.269615	0.355566	0.511941	-0.353761	0.374147	0.528518	-0.240682	0.211076	0.66534
-4.51831	-0.078823	-1.35854	-0.484917	-0.653175	-0.228164	-0.173016	-0.90964	-0.531891	-0.669193	-0.389613	-0.240876	-1.09203	0.0300398	-0.6484	-0.562064	-0.446679	-0.397035	-0.0499385	-0.347172	-0.456023	-0.182793	-0.512614	-0.63659	-0.345638	0.399352	-0.528058	0.529723	-0.462235	-0.0434379	-0.206191	-0.126498	-0.87594	0.255225	-0.436142	-0.0178045	-0.139774	0.349062	-0.862952	-0.225042	0.288216	-0.268974	0.355477	0.511565	-0.354607	0.373437	0.527287	-0.242265	0.210249	0.66474
-4.51733	-0.0790966	-1.35875	-0.483592	-0.651549	-0.227704	-0.17169	-0.909072	-0.532781	-0.667647	-0.389629	-0.241482	-1.09209	0.0290787	-0.648469	-0.56111	-0.447446	-0.397243	-0.0495462	-0.347474	-0.454925	-0.183234	-0.51312	-0.637354	-0.345595	0.399645	-0.528152	0.531164	-0.461842	-0.0423472	-0.206548	-0.124327	-0.875811	0.25509	-0.435547	-0.0185808	-0.139869	0.349513	-0.863829	-0.22388	0.287581	-0.268328	0.355397	0.511184	-0.355449	0.372733	0.526044	-0.243836	0.20943	0.664143
-4.51634	-0.079359	-1.35896	-0.482267	-0.649926	-0.22725	-0.170392	-0.908503	-0.53368	-0.666105	-0.389644	-0.242099	-1.09217	0.0281094	-0.648532	-0.560149	-0.448221	-0.397454	-0.0491577	-0.347783	-0.453831	-0.183676	-0.513627	-0.638128	-0.345562	0.399935	-0.528247	0.532597	-0.461459	-0.0412589	-0.206898	-0.122166	-0.875683	0.254962	-0.43496	-0.0193616	-0.139962	0.349966	-0.864703	-0.22272	0.286961	-0.267677	0.355326	0.510797	-0.356289	0.372035	0.524789	-0.245392	0.20862	0.663548
-4.51536	-0.0796101	-1.35918	-0.480943	-0.648307	-0.226802	-0.169122	-0.907932	-0.534586	-0.664568	-0.389659	-0.242727	-1.09225	0.0271319	-0.648587	-0.559181	-0.449003	-0.397668	-0.0487731	-0.348099	-0.452741	-0.184118	-0.514135	-0.638911	-0.34554	0.400224	-0.528345	0.534023	-0.461089	-0.0401732	-0.207242	-0.120017	-0.875554	0.254844	-0.434381	-0.0201469	-0.140053	0.350422	-0.865576	-0.221561	0.286356	-0.267021	0.355263	0.510405	-0.357125	0.371343	0.523522	-0.246935	0.207819	0.662955
-4.51438	-0.0798499	-1.35941	-0.47962	-0.646691	-0.22636	-0.16788	-0.907359	-0.535499	-0.663037	-0.389673	-0.243367	-1.09233	0.0261464	-0.648634	-0.558205	-0.449792	-0.397885	-0.0483925	-0.348422	-0.451655	-0.184562	-0.514644	-0.639703	-0.345529	0.400511	-0.528444	0.535441	-0.460729	-0.03909	-0.20758	-0.117878	-0.875425	0.254733	-0.433811	-0.0209365	-0.140141	0.350879	-0.866447	-0.220403	0.285765	-0.26636	0.355209	0.510008	-0.357959	0.370657	0.522242	-0.248464	0.207027	0.662364
-4.5134	-0.0800782	-1.35964	-0.478298	-0.645078	-0.225925	-0.166666	-0.906785	-0.53642	-0.66151	-0.389685	-0.244018	-1.09242	0.025153	-0.648675	-0.557223	-0.450587	-0.398105	-0.0480158	-0.348752	-0.450574	-0.185007	-0.515154	-0.640504	-0.345529	0.400796	-0.528546	0.536852	-0.460382	-0.0380096	-0.207911	-0.11575	-0.875296	0.254631	-0.433248	-0.0217305	-0.140227	0.351339	-0.867316	-0.219248	0.28519	-0.265695	0.355163	0.509607	-0.358789	0.369977	0.520951	-0.249978	0.206244	0.661776
-4.51241	-0.0802951	-1.35989	-0.476976	-0.643469	-0.225496	-0.16548	-0.906209	-0.537349	-0.659989	-0.389697	-0.244681	-1.09251	0.0241519	-0.648708	-0.556234	-0.45139	-0.398327	-0.0476433	-0.349088	-0.449498	-0.185454	-0.515664	-0.641314	-0.345539	0.40108	-0.528649	0.538255	-0.460045	-0.0369319	-0.208236	-0.113633	-0.875168	0.254537	-0.432694	-0.0225286	-0.14031	0.351802	-0.868183	-0.218094	0.28463	-0.265026	0.355126	0.5092	-0.359616	0.369303	0.519647	-0.251478	0.205469	0.66119
-4.51143	-0.0805004	-1.36014	-0.475656	-0.641864	-0.225073	-0.164323	-0.905632	-0.538285	-0.658474	-0.389709	-0.245354	-1.09261	0.023143	-0.648733	-0.555239	-0.452199	-0.398553	-0.0472749	-0.349431	-0.448426	-0.185901	-0.516175	-0.642133	-0.345561	0.401362	-0.528753	0.53965	-0.45972	-0.0358569	-0.208554	-0.111527	-0.875039	0.254452	-0.432148	-0.0233309	-0.140391	0.352267	-0.869048	-0.216943	0.284085	-0.264352	0.355098	0.50879	-0.36044	0.368636	0.518331	-0.252963	0.204703	0.660607
-4.51045	-0.0806941	-1.36039	-0.474336	-0.640263	-0.224656	-0.163195	-0.905053	-0.539228	-0.656964	-0.389719	-0.246038	-1.09271	0.0221267	-0.648751	-0.554236	-0.453014	-0.398781	-0.0469106	-0.349781	-0.447359	-0.186349	-0.516686	-0.642961	-0.345593	0.401643	-0.52886	0.541037	-0.459407	-0.0347848	-0.208865	-0.109432	-0.874911	0.254374	-0.431609	-0.0241372	-0.14047	0.352735	-0.869911	-0.215794	0.283554	-0.263674	0.355078	0.508374	-0.36126	0.367974	0.517002	-0.254432	0.203947	0.660026
-4.50946	-0.0808761	-1.36065	-0.473017	-0.638665	-0.224246	-0.162095	-0.904473	-0.540178	-0.65546	-0.389728	-0.246734	-1.09282	0.0211029	-0.648762	-0.553227	-0.453836	-0.399012	-0.0465506	-0.350137	-0.446297	-0.186798	-0.517197	-0.643798	-0.345636	0.401923	-0.528969	0.542416	-0.459105	-0.0337157	-0.209169	-0.107349	-0.874783	0.254306	-0.431078	-0.0249475	-0.140546	0.353206	-0.870771	-0.214648	0.283038	-0.262992	0.355067	0.507955	-0.362077	0.367319	0.515662	-0.255887	0.203199	0.659448
-4.50848	-0.0810464	-1.36092	-0.471699	-0.637071	-0.223842	-0.161025	-0.903891	-0.541135	-0.653962	-0.389736	-0.24744	-1.09294	0.0200718	-0.648765	-0.552212	-0.454665	-0.399246	-0.0461948	-0.3505	-0.44524	-0.187247	-0.517709	-0.644643	-0.34569	0.402201	-0.529079	0.543787	-0.458814	-0.0326495	-0.209465	-0.105277	-0.874656	0.254245	-0.430555	-0.0257617	-0.140621	0.353679	-0.87163	-0.213504	0.282537	-0.262307	0.355064	0.507531	-0.36289	0.36667	0.514309	-0.257326	0.202459	0.658873
-4.5075	-0.0812049	-1.3612	-0.470382	-0.63548	-0.223445	-0.159984	-0.903308	-0.5421	-0.65247	-0.389743	-0.248156	-1.09306	0.0190335	-0.64876	-0.55119	-0.4555	-0.399482	-0.0458433	-0.350869	-0.444188	-0.187698	-0.51822	-0.645497	-0.345754	0.402479	-0.529192	0.54515	-0.458534	-0.0315864	-0.209755	-0.103216	-0.874528	0.254194	-0.43004	-0.0265797	-0.140692	0.354155	-0.872486	-0.212363	0.28205	-0.261617	0.35507	0.507104	-0.363699	0.366027	0.512944	-0.258749	0.201729	0.6583
-4.50651	-0.0813516	-1.36148	-0.469066	-0.633894	-0.223054	-0.158972	-0.902724	-0.543071	-0.650984	-0.389749	-0.248884	-1.09318	0.0179881	-0.648747	-0.550162	-0.456341	-0.39972	-0.0454962	-0.351244	-0.443141	-0.188149	-0.518732	-0.64636	-0.34583	0.402756	-0.529306	0.546505	-0.458266	-0.0305264	-0.210037	-0.101166	-0.874401	0.25415	-0.429532	-0.0274013	-0.140762	0.354633	-0.87334	-0.211225	0.281578	-0.260924	0.355084	0.506672	-0.364505	0.365391	0.511566	-0.260156	0.201008	0.65773
-4.50553	-0.0814863	-1.36177	-0.467751	-0.632311	-0.222669	-0.157989	-0.902138	-0.544049	-0.649504	-0.389754	-0.249621	-1.09331	0.0169358	-0.648726	-0.549128	-0.457188	-0.399961	-0.0451535	-0.351626	-0.442099	-0.188602	-0.519243	-0.64723	-0.345916	0.403032	-0.529422	0.547852	-0.458009	-0.0294696	-0.210312	-0.099128	-0.874275	0.254115	-0.429031	-0.0282266	-0.140829	0.355115	-0.874191	-0.210089	0.28112	-0.260228	0.355107	0.506237	-0.365306	0.36476	0.510177	-0.261546	0.200295	0.657163
-4.50455	-0.0816091	-1.36207	-0.466436	-0.630733	-0.222291	-0.157036	-0.901551	-0.545034	-0.648031	-0.389758	-0.250369	-1.09344	0.0158767	-0.648698	-0.548087	-0.458041	-0.400205	-0.0448153	-0.352014	-0.441062	-0.189055	-0.519754	-0.648109	-0.346013	0.403308	-0.52954	0.54919	-0.457764	-0.028416	-0.21058	-0.0971013	-0.874149	0.254089	-0.428538	-0.0290554	-0.140894	0.355599	-0.875041	-0.208957	0.280677	-0.259528	0.355138	0.505798	-0.366103	0.364137	0.508776	-0.26292	0.199592	0.656599
-4.50356	-0.0817199	-1.36237	-0.465122	-0.629159	-0.221919	-0.156113	-0.900963	-0.546026	-0.646565	-0.389761	-0.251127	-1.09358	0.0148108	-0.648661	-0.547041	-0.4589	-0.40045	-0.0444816	-0.352407	-0.440031	-0.189508	-0.520265	-0.648996	-0.346121	0.403583	-0.52966	0.55052	-0.45753	-0.0273657	-0.210839	-0.0950861	-0.874024	0.254071	-0.428052	-0.0298877	-0.140957	0.356087	-0.875888	-0.207829	0.280248	-0.258825	0.355178	0.505356	-0.366897	0.36352	0.507362	-0.264277	0.198897	0.656038
-4.50258	-0.0818186	-1.36268	-0.463809	-0.627588	-0.221554	-0.155219	-0.900373	-0.547025	-0.645106	-0.389762	-0.251896	-1.09372	0.0137384	-0.648617	-0.545988	-0.459765	-0.400698	-0.0441525	-0.352807	-0.439005	-0.189962	-0.520775	-0.649891	-0.34624	0.403858	-0.529781	0.551841	-0.457307	-0.0263188	-0.211091	-0.0930825	-0.873899	0.254061	-0.427573	-0.0307233	-0.141017	0.356577	-0.876732	-0.206704	0.279833	-0.258119	0.355226	0.50491	-0.367686	0.362909	0.505936	-0.265617	0.198211	0.65548
-4.5016	-0.0819052	-1.36299	-0.462497	-0.626022	-0.221195	-0.154356	-0.899783	-0.54803	-0.643653	-0.389763	-0.252674	-1.09387	0.0126595	-0.648564	-0.54493	-0.460635	-0.400948	-0.0438279	-0.353213	-0.437984	-0.190417	-0.521285	-0.650793	-0.34637	0.404133	-0.529905	0.553154	-0.457095	-0.0252752	-0.211335	-0.0910904	-0.873775	0.254061	-0.427101	-0.0315621	-0.141076	0.357071	-0.877574	-0.205582	0.279433	-0.25741	0.355283	0.504461	-0.36847	0.362305	0.504498	-0.26694	0.197534	0.654926
-4.50062	-0.0819796	-1.36331	-0.461185	-0.624461	-0.220843	-0.153523	-0.899191	-0.549042	-0.642208	-0.389762	-0.253463	-1.09402	0.0115742	-0.648504	-0.543865	-0.461511	-0.4012	-0.043508	-0.353625	-0.43697	-0.190873	-0.521794	-0.651704	-0.34651	0.404408	-0.53003	0.554459	-0.456894	-0.0242352	-0.21157	-0.0891101	-0.873651	0.254068	-0.426635	-0.0324042	-0.141132	0.357567	-0.878414	-0.204465	0.279046	-0.256698	0.355348	0.504009	-0.36925	0.361707	0.503048	-0.268245	0.196866	0.654374
-4.49963	-0.0820419	-1.36364	-0.459874	-0.622903	-0.220497	-0.152719	-0.898598	-0.55006	-0.640769	-0.389759	-0.254261	-1.09418	0.0104827	-0.648435	-0.542795	-0.462393	-0.401454	-0.0431928	-0.354042	-0.43596	-0.191328	-0.522302	-0.652622	-0.346661	0.404683	-0.530157	0.555754	-0.456704	-0.0231987	-0.211798	-0.0871414	-0.873528	0.254084	-0.426177	-0.0332493	-0.141185	0.358067	-0.879251	-0.203351	0.278674	-0.255984	0.355422	0.503555	-0.370026	0.361116	0.501585	-0.269532	0.196207	0.653825
-4.49865	-0.0820918	-1.36397	-0.458564	-0.62135	-0.220158	-0.151946	-0.898004	-0.551084	-0.639338	-0.389755	-0.255068	-1.09434	0.00938501	-0.648358	-0.54172	-0.46328	-0.40171	-0.0428824	-0.354465	-0.434957	-0.191785	-0.522809	-0.653547	-0.346824	0.404958	-0.530286	0.557041	-0.456526	-0.0221657	-0.212017	-0.0851844	-0.873406	0.254109	-0.425726	-0.0340974	-0.141237	0.35857	-0.880085	-0.202242	0.278316	-0.255267	0.355504	0.503097	-0.370797	0.360532	0.500111	-0.270802	0.195557	0.65328
-4.49767	-0.0821295	-1.36431	-0.457255	-0.619802	-0.219825	-0.151204	-0.897408	-0.552115	-0.637915	-0.38975	-0.255886	-1.09451	0.00828134	-0.648273	-0.540638	-0.464173	-0.401967	-0.0425767	-0.354894	-0.433959	-0.192241	-0.523315	-0.654481	-0.346997	0.405233	-0.530417	0.558319	-0.456358	-0.0211365	-0.212228	-0.0832392	-0.873284	0.254142	-0.42528	-0.0349484	-0.141287	0.359076	-0.880917	-0.201136	0.277971	-0.254548	0.355594	0.502637	-0.371564	0.359954	0.498625	-0.272053	0.194916	0.652738
-4.49668	-0.0821549	-1.36465	-0.455947	-0.618258	-0.219498	-0.150492	-0.896812	-0.553152	-0.636499	-0.389744	-0.256712	-1.09468	0.00717178	-0.648179	-0.539551	-0.46507	-0.402227	-0.0422759	-0.355328	-0.432967	-0.192699	-0.523821	-0.655421	-0.34718	0.40551	-0.530549	0.559588	-0.456202	-0.0201109	-0.212431	-0.0813058	-0.873164	0.254184	-0.424842	-0.0358022	-0.141334	0.359586	-0.881747	-0.200035	0.27764	-0.253827	0.355693	0.502174	-0.372325	0.359383	0.497126	-0.273285	0.194284	0.652199
-4.4957	-0.0821679	-1.365	-0.454639	-0.616718	-0.219179	-0.149811	-0.896215	-0.554195	-0.635091	-0.389736	-0.257548	-1.09486	0.00605645	-0.648077	-0.538459	-0.465973	-0.402488	-0.0419799	-0.355767	-0.431981	-0.193156	-0.524325	-0.656368	-0.347375	0.405786	-0.530684	0.560849	-0.456056	-0.0190891	-0.212624	-0.0793842	-0.873044	0.254234	-0.42441	-0.0366587	-0.141379	0.360099	-0.882574	-0.198939	0.277323	-0.253104	0.3558	0.501709	-0.373082	0.358819	0.495615	-0.274499	0.193661	0.651663
-4.49472	-0.0821685	-1.36536	-0.453332	-0.615183	-0.218865	-0.14916	-0.895616	-0.555244	-0.633691	-0.389726	-0.258394	-1.09504	0.00493546	-0.647967	-0.537361	-0.466881	-0.40275	-0.0416889	-0.356212	-0.431001	-0.193614	-0.524828	-0.657323	-0.34758	0.406064	-0.53082	0.5621	-0.455922	-0.0180711	-0.212809	-0.0774745	-0.872925	0.254293	-0.423984	-0.0375178	-0.141422	0.360615	-0.883398	-0.197847	0.27702	-0.252379	0.355916	0.501242	-0.373833	0.358261	0.494093	-0.275693	0.193046	0.651131
-4.49373	-0.0821566	-1.36572	-0.452025	-0.613653	-0.218558	-0.14854	-0.895017	-0.556299	-0.632298	-0.389715	-0.259248	-1.09522	0.00380892	-0.647848	-0.536259	-0.467794	-0.403015	-0.0414028	-0.356662	-0.430027	-0.194072	-0.525329	-0.658284	-0.347797	0.406343	-0.530958	0.563343	-0.455798	-0.017057	-0.212986	-0.0755767	-0.872806	0.25436	-0.423564	-0.0383794	-0.141463	0.361135	-0.884219	-0.19676	0.27673	-0.251652	0.35604	0.500772	-0.37458	0.357711	0.492558	-0.276869	0.192441	0.650603
-4.49275	-0.0821322	-1.36609	-0.45072	-0.612127	-0.218258	-0.147951	-0.894416	-0.557361	-0.630914	-0.389702	-0.260111	-1.09541	0.00267695	-0.647721	-0.53515	-0.468712	-0.40328	-0.0411217	-0.357118	-0.429059	-0.19453	-0.525829	-0.659252	-0.348023	0.406623	-0.531098	0.564576	-0.455685	-0.0160469	-0.213153	-0.0736908	-0.872689	0.254436	-0.423151	-0.0392434	-0.141502	0.361658	-0.885038	-0.195679	0.276453	-0.250923	0.356172	0.500301	-0.375321	0.357167	0.491012	-0.278025	0.191845	0.650078
-4.49177	-0.0820954	-1.36646	-0.449415	-0.610607	-0.217964	-0.147393	-0.893815	-0.558427	-0.629538	-0.389687	-0.260983	-1.0956	0.00153967	-0.647586	-0.534037	-0.469634	-0.403547	-0.0408456	-0.357578	-0.428097	-0.194988	-0.526327	-0.660227	-0.348261	0.406904	-0.53124	0.5658	-0.455583	-0.0150407	-0.213311	-0.0718168	-0.872573	0.25452	-0.422743	-0.0401098	-0.141539	0.362185	-0.885854	-0.194602	0.27619	-0.250193	0.356312	0.499828	-0.376058	0.35663	0.489453	-0.279161	0.191257	0.649556
-4.49079	-0.082046	-1.36684	-0.44811	-0.609091	-0.217677	-0.146866	-0.893212	-0.5595	-0.628171	-0.389671	-0.261864	-1.0958	0.000397193	-0.647441	-0.532919	-0.470561	-0.403816	-0.0405747	-0.358044	-0.427141	-0.195447	-0.526823	-0.661209	-0.348509	0.407186	-0.531383	0.567015	-0.455491	-0.0140385	-0.21346	-0.0699548	-0.872457	0.254612	-0.422341	-0.0409784	-0.141574	0.362716	-0.886668	-0.19353	0.27594	-0.249462	0.356461	0.499353	-0.376788	0.3561	0.487882	-0.280278	0.190678	0.649038
-4.4898	-0.081984	-1.36722	-0.446806	-0.60758	-0.217396	-0.14637	-0.892609	-0.560578	-0.626812	-0.389653	-0.262754	-1.096	-0.00075037	-0.647289	-0.531796	-0.471492	-0.404085	-0.0403088	-0.358514	-0.426192	-0.195905	-0.527318	-0.662197	-0.348768	0.40747	-0.531529	0.568221	-0.455411	-0.0130405	-0.213599	-0.0681048	-0.872343	0.254713	-0.421946	-0.0418491	-0.141607	0.36325	-0.887478	-0.192464	0.275703	-0.248729	0.356617	0.498877	-0.377514	0.355576	0.4863	-0.281374	0.190109	0.648523
-4.48882	-0.0819094	-1.36761	-0.445503	-0.606074	-0.217122	-0.145906	-0.892005	-0.561662	-0.625461	-0.389634	-0.263652	-1.09621	-0.0019029	-0.647127	-0.530668	-0.472428	-0.404356	-0.0400482	-0.358989	-0.425249	-0.196364	-0.527811	-0.663191	-0.349038	0.407756	-0.531676	0.569417	-0.45534	-0.0120466	-0.213729	-0.0662667	-0.872229	0.254823	-0.421555	-0.0427218	-0.141638	0.363788	-0.888286	-0.191404	0.27548	-0.247996	0.356782	0.498399	-0.378233	0.35506	0.484706	-0.28245	0.189548	0.648012
-4.48784	-0.0818222	-1.368	-0.444201	-0.604573	-0.216854	-0.145472	-0.8914	-0.562752	-0.62412	-0.389612	-0.264558	-1.09641	-0.00306029	-0.646957	-0.529536	-0.473369	-0.404628	-0.0397927	-0.359469	-0.424312	-0.196823	-0.528302	-0.664191	-0.349318	0.408043	-0.531825	0.570605	-0.455281	-0.0110569	-0.21385	-0.0644407	-0.872116	0.254941	-0.421171	-0.0435965	-0.141667	0.364329	-0.889091	-0.190349	0.275269	-0.247261	0.356955	0.497919	-0.378947	0.35455	0.483099	-0.283506	0.188996	0.647505
-4.48685	-0.0817223	-1.3684	-0.442899	-0.603077	-0.216592	-0.14507	-0.890794	-0.563847	-0.622787	-0.389589	-0.265473	-1.09663	-0.00422242	-0.646779	-0.528398	-0.474313	-0.404901	-0.0395425	-0.359953	-0.423382	-0.197281	-0.52879	-0.665198	-0.349609	0.408333	-0.531976	0.571783	-0.455232	-0.0100715	-0.213961	-0.0626267	-0.872005	0.255067	-0.420791	-0.044473	-0.141694	0.364875	-0.889894	-0.1893	0.275071	-0.246526	0.357137	0.497439	-0.379656	0.354048	0.481481	-0.28454	0.188453	0.647001
-4.48587	-0.0816098	-1.3688	-0.441598	-0.601586	-0.216337	-0.1447	-0.890187	-0.564947	-0.621463	-0.389564	-0.266395	-1.09684	-0.00538918	-0.646592	-0.527256	-0.475262	-0.405175	-0.0392975	-0.360442	-0.422459	-0.197739	-0.529276	-0.66621	-0.349911	0.408625	-0.532129	0.572951	-0.455193	-0.00909039	-0.214062	-0.0608247	-0.871895	0.255202	-0.420417	-0.0453512	-0.141719	0.365424	-0.890693	-0.188257	0.274886	-0.24579	0.357326	0.496958	-0.380358	0.353553	0.479851	-0.285554	0.187918	0.646501
-4.48489	-0.0814845	-1.36921	-0.440297	-0.600101	-0.216089	-0.144361	-0.889579	-0.566052	-0.620148	-0.389537	-0.267326	-1.09706	-0.00656046	-0.646396	-0.52611	-0.476215	-0.40545	-0.0390579	-0.360936	-0.421542	-0.198198	-0.52976	-0.667228	-0.350223	0.408919	-0.532283	0.57411	-0.455165	-0.00811363	-0.214154	-0.0590347	-0.871785	0.255345	-0.420049	-0.0462311	-0.141742	0.365977	-0.891489	-0.18722	0.274713	-0.245054	0.357523	0.496475	-0.381055	0.353064	0.478209	-0.286547	0.187393	0.646004
-4.4839	-0.0813466	-1.36962	-0.438997	-0.598621	-0.215847	-0.144053	-0.888971	-0.567163	-0.618842	-0.389508	-0.268265	-1.09729	-0.00773614	-0.646191	-0.524959	-0.477171	-0.405726	-0.0388236	-0.361434	-0.420631	-0.198656	-0.530242	-0.668252	-0.350545	0.409215	-0.532439	0.57526	-0.455147	-0.00714128	-0.214235	-0.0572568	-0.871677	0.255496	-0.419685	-0.0471125	-0.141763	0.366533	-0.892283	-0.186189	0.274553	-0.244317	0.357729	0.495992	-0.381745	0.352583	0.476556	-0.287518	0.186877	0.645511
-4.48292	-0.0811959	-1.37004	-0.437698	-0.597146	-0.215611	-0.143777	-0.888362	-0.568279	-0.617546	-0.389476	-0.269211	-1.09752	-0.00891611	-0.645978	-0.523804	-0.478132	-0.406002	-0.0385946	-0.361936	-0.419728	-0.199114	-0.530721	-0.669282	-0.350878	0.409514	-0.532598	0.5764	-0.45514	-0.00617339	-0.214307	-0.055491	-0.87157	0.255656	-0.419326	-0.0479953	-0.141782	0.367094	-0.893074	-0.185165	0.274405	-0.243581	0.357942	0.495509	-0.38243	0.352108	0.474891	-0.288468	0.186369	0.645022
-4.48194	-0.0810325	-1.37046	-0.436399	-0.595676	-0.215382	-0.143532	-0.887752	-0.5694	-0.616259	-0.389443	-0.270165	-1.09775	-0.0101003	-0.645755	-0.522645	-0.479096	-0.406279	-0.0383712	-0.362442	-0.418831	-0.199571	-0.531197	-0.670316	-0.351222	0.409816	-0.532757	0.57753	-0.455142	-0.00521	-0.214368	-0.0537372	-0.871464	0.255824	-0.418973	-0.0488794	-0.1418	0.367659	-0.893862	-0.184147	0.27427	-0.242844	0.358163	0.495024	-0.383108	0.351641	0.473214	-0.289396	0.18587	0.644537
-4.48095	-0.0808563	-1.37089	-0.435101	-0.594212	-0.215159	-0.14332	-0.887141	-0.570526	-0.614982	-0.389408	-0.271127	-1.09798	-0.0112885	-0.645525	-0.521481	-0.480064	-0.406557	-0.0381531	-0.362953	-0.41794	-0.200028	-0.531671	-0.671356	-0.351576	0.410121	-0.532919	0.578651	-0.455155	-0.00425118	-0.214419	-0.0519955	-0.871359	0.256	-0.418624	-0.0497648	-0.141816	0.368228	-0.894646	-0.183136	0.274146	-0.242107	0.358393	0.49454	-0.38378	0.351181	0.471525	-0.290302	0.18538	0.644056
-4.47997	-0.0806673	-1.37132	-0.433803	-0.592754	-0.214942	-0.143138	-0.886529	-0.571656	-0.613714	-0.389371	-0.272095	-1.09822	-0.0124807	-0.645285	-0.520314	-0.481035	-0.406835	-0.0379406	-0.363467	-0.417057	-0.200485	-0.532141	-0.672402	-0.35194	0.410429	-0.533083	0.579762	-0.455178	-0.00329696	-0.21446	-0.0502658	-0.871255	0.256185	-0.418279	-0.0506512	-0.14183	0.368801	-0.895428	-0.182132	0.274035	-0.241371	0.35863	0.494055	-0.384445	0.350728	0.469825	-0.291185	0.184899	0.643578
-4.47899	-0.0804656	-1.37175	-0.432506	-0.591301	-0.214732	-0.142989	-0.885917	-0.572792	-0.612456	-0.389331	-0.273072	-1.09847	-0.0136767	-0.645036	-0.519143	-0.48201	-0.407114	-0.0377336	-0.363986	-0.41618	-0.200941	-0.532609	-0.673452	-0.352315	0.41074	-0.533248	0.580864	-0.455211	-0.00234739	-0.21449	-0.0485481	-0.871152	0.256377	-0.41794	-0.0515387	-0.141842	0.369378	-0.896207	-0.181135	0.273936	-0.240635	0.358875	0.493569	-0.385104	0.350282	0.468113	-0.292047	0.184426	0.643104
-4.47801	-0.0802511	-1.37219	-0.431209	-0.589853	-0.214528	-0.142871	-0.885304	-0.573932	-0.611207	-0.389289	-0.274055	-1.09871	-0.0148765	-0.644779	-0.517967	-0.482988	-0.407393	-0.0375321	-0.364508	-0.415311	-0.201397	-0.533074	-0.674507	-0.352699	0.411054	-0.533415	0.581956	-0.455253	-0.00140251	-0.214509	-0.0468426	-0.871051	0.256578	-0.417604	-0.0524271	-0.141853	0.369959	-0.896983	-0.180145	0.273849	-0.2399	0.359127	0.493084	-0.385757	0.349843	0.46639	-0.292886	0.183962	0.642634
-4.47702	-0.0800237	-1.37263	-0.429913	-0.588412	-0.21433	-0.142785	-0.88469	-0.575077	-0.609969	-0.389245	-0.275045	-1.09896	-0.0160799	-0.644513	-0.516788	-0.48397	-0.407672	-0.0373362	-0.365033	-0.414448	-0.201853	-0.533535	-0.675566	-0.353095	0.411372	-0.533584	0.583038	-0.455306	-0.00046239	-0.214518	-0.045149	-0.870951	0.256786	-0.417274	-0.0533163	-0.141862	0.370544	-0.897756	-0.179161	0.273773	-0.239165	0.359388	0.492599	-0.386403	0.349412	0.464655	-0.293702	0.183507	0.642167
-4.47604	-0.0797836	-1.37308	-0.428617	-0.586976	-0.214139	-0.142731	-0.884076	-0.576226	-0.608741	-0.389198	-0.276042	-1.09921	-0.0172868	-0.644238	-0.515605	-0.484954	-0.407952	-0.0371459	-0.365563	-0.413592	-0.202307	-0.533994	-0.676631	-0.3535	0.411693	-0.533755	0.584111	-0.455369	0.000472944	-0.214517	-0.0434675	-0.870852	0.257003	-0.416947	-0.0542063	-0.141869	0.371133	-0.898526	-0.178186	0.273709	-0.238432	0.359656	0.492115	-0.387042	0.348987	0.462909	-0.294495	0.183061	0.641705
-4.47506	-0.0795307	-1.37353	-0.427322	-0.585545	-0.213954	-0.142709	-0.883461	-0.57738	-0.607523	-0.38915	-0.277046	-1.09947	-0.0184972	-0.643954	-0.514419	-0.485942	-0.408231	-0.0369613	-0.366096	-0.412743	-0.202762	-0.534448	-0.677699	-0.353915	0.412019	-0.533928	0.585173	-0.455441	0.00140344	-0.214504	-0.0417979	-0.870754	0.257228	-0.416624	-0.0550968	-0.141875	0.371727	-0.899293	-0.177217	0.273657	-0.237699	0.359932	0.49163	-0.387674	0.34857	0.461151	-0.295265	0.182623	0.641246
-4.47407	-0.079265	-1.37399	-0.426027	-0.584121	-0.213775	-0.142718	-0.882846	-0.578538	-0.606315	-0.389098	-0.278057	-1.09973	-0.0197108	-0.643661	-0.513229	-0.486933	-0.408511	-0.0367824	-0.366632	-0.411901	-0.203215	-0.5349	-0.678772	-0.354341	0.412348	-0.534102	0.586226	-0.455522	0.00232906	-0.21448	-0.0401404	-0.870657	0.257461	-0.416306	-0.0559878	-0.141879	0.372325	-0.900057	-0.176257	0.273615	-0.236968	0.360216	0.491146	-0.388299	0.34816	0.459381	-0.296012	0.182194	0.640791
-4.47309	-0.0789865	-1.37444	-0.424733	-0.582703	-0.213602	-0.142759	-0.882229	-0.579701	-0.605117	-0.389045	-0.279074	-1.09999	-0.0209277	-0.64336	-0.512035	-0.487926	-0.408791	-0.0366091	-0.367172	-0.411067	-0.203668	-0.535348	-0.67985	-0.354777	0.412681	-0.534278	0.587269	-0.455614	0.00324976	-0.214446	-0.0384949	-0.870562	0.257701	-0.415991	-0.0568792	-0.141882	0.372927	-0.900818	-0.175304	0.273585	-0.236237	0.360507	0.490663	-0.388918	0.347758	0.457601	-0.296735	0.181774	0.640341
-4.47211	-0.0786951	-1.37491	-0.423439	-0.58129	-0.213436	-0.142832	-0.881613	-0.580868	-0.60393	-0.388988	-0.280098	-1.10025	-0.0221476	-0.643049	-0.510839	-0.488922	-0.409071	-0.0364416	-0.367715	-0.410239	-0.20412	-0.535792	-0.680931	-0.355223	0.413019	-0.534456	0.588303	-0.455715	0.00416549	-0.2144	-0.0368613	-0.870467	0.25795	-0.41568	-0.0577709	-0.141883	0.373534	-0.901575	-0.174359	0.273567	-0.235509	0.360805	0.49018	-0.389529	0.347362	0.455809	-0.297434	0.181362	0.639893
-4.47112	-0.078391	-1.37537	-0.422145	-0.579884	-0.213275	-0.142937	-0.880995	-0.582039	-0.602753	-0.38893	-0.281128	-1.10052	-0.0233706	-0.64273	-0.509639	-0.489921	-0.409351	-0.0362798	-0.368261	-0.409419	-0.204571	-0.536232	-0.682016	-0.355678	0.413361	-0.534636	0.589326	-0.455825	0.00507621	-0.214343	-0.0352396	-0.870374	0.258206	-0.415373	-0.0586627	-0.141883	0.374145	-0.90233	-0.173422	0.273559	-0.234781	0.361112	0.489698	-0.390133	0.346974	0.454006	-0.29811	0.180959	0.63945
-4.47014	-0.0780741	-1.37584	-0.420852	-0.578483	-0.213121	-0.143074	-0.880377	-0.583214	-0.601587	-0.388868	-0.282164	-1.10079	-0.0245964	-0.642402	-0.508435	-0.490922	-0.409631	-0.0361239	-0.368811	-0.408606	-0.205022	-0.536669	-0.683105	-0.356144	0.413708	-0.534817	0.590339	-0.455945	0.00598188	-0.214275	-0.0336299	-0.870282	0.25847	-0.415069	-0.0595546	-0.141881	0.37476	-0.903082	-0.172493	0.273562	-0.234056	0.361425	0.489217	-0.39073	0.346593	0.452191	-0.298762	0.180565	0.639011
-4.46916	-0.0777445	-1.37631	-0.41956	-0.577089	-0.212973	-0.143242	-0.879759	-0.584393	-0.600432	-0.388804	-0.283206	-1.10106	-0.0258251	-0.642065	-0.507229	-0.491926	-0.40991	-0.0359737	-0.369363	-0.4078	-0.205471	-0.537101	-0.684197	-0.356619	0.414059	-0.535001	0.591343	-0.456073	0.00688246	-0.214195	-0.0320321	-0.870192	0.258741	-0.414768	-0.0604465	-0.141877	0.37538	-0.90383	-0.171572	0.273575	-0.233333	0.361746	0.488738	-0.391319	0.346219	0.450366	-0.299389	0.180179	0.638575
-4.46818	-0.077402	-1.37679	-0.418267	-0.575701	-0.212831	-0.143442	-0.879139	-0.585576	-0.599288	-0.388738	-0.284253	-1.10133	-0.0270563	-0.641719	-0.50602	-0.492932	-0.410189	-0.0358294	-0.369918	-0.407001	-0.20592	-0.53753	-0.685293	-0.357105	0.414415	-0.535186	0.592337	-0.456211	0.00777791	-0.214104	-0.0304461	-0.870102	0.259021	-0.414471	-0.0613383	-0.141873	0.376004	-0.904576	-0.170659	0.2736	-0.232611	0.362075	0.488259	-0.391901	0.345853	0.448529	-0.299993	0.179801	0.638143
-4.46719	-0.0770469	-1.37727	-0.416975	-0.574319	-0.212694	-0.143674	-0.87852	-0.586763	-0.598154	-0.388668	-0.285307	-1.10161	-0.0282902	-0.641365	-0.504808	-0.49394	-0.410468	-0.0356909	-0.370476	-0.40621	-0.206367	-0.537954	-0.686392	-0.3576	0.414776	-0.535373	0.59332	-0.456358	0.00866819	-0.214001	-0.028872	-0.870014	0.259307	-0.414177	-0.0622297	-0.141867	0.376633	-0.905318	-0.169756	0.273634	-0.231892	0.362411	0.487782	-0.392476	0.345494	0.446681	-0.300571	0.179432	0.637716
-4.46621	-0.0766789	-1.37775	-0.415684	-0.572944	-0.212564	-0.143938	-0.8779	-0.587954	-0.597031	-0.388596	-0.286366	-1.10189	-0.0295266	-0.641001	-0.503593	-0.494951	-0.410746	-0.0355584	-0.371036	-0.405426	-0.206814	-0.538374	-0.687495	-0.358104	0.415143	-0.535562	0.594294	-0.456514	0.00955325	-0.213886	-0.0273096	-0.869927	0.259602	-0.413887	-0.0631209	-0.141859	0.377267	-0.906057	-0.16886	0.27368	-0.231175	0.362754	0.487306	-0.393043	0.345142	0.444823	-0.301125	0.179072	0.637291
-4.46523	-0.0762983	-1.37823	-0.414393	-0.571574	-0.21244	-0.144233	-0.877279	-0.589148	-0.59592	-0.388521	-0.287431	-1.10217	-0.0307653	-0.640629	-0.502375	-0.495964	-0.411024	-0.0354317	-0.371599	-0.404649	-0.207259	-0.53879	-0.6886	-0.358619	0.415515	-0.535752	0.595258	-0.456679	0.0104331	-0.21376	-0.0257591	-0.869841	0.259903	-0.413599	-0.0640115	-0.141851	0.377905	-0.906793	-0.167974	0.273735	-0.23046	0.363104	0.486832	-0.393602	0.344797	0.442953	-0.301655	0.17872	0.636871
-4.46424	-0.075905	-1.37872	-0.413102	-0.570212	-0.212321	-0.144561	-0.876658	-0.590346	-0.594819	-0.388443	-0.288502	-1.10246	-0.0320063	-0.640248	-0.501154	-0.496978	-0.411301	-0.035311	-0.372165	-0.40388	-0.207704	-0.539202	-0.689708	-0.359143	0.415892	-0.535945	0.596211	-0.456853	0.0113076	-0.213622	-0.0242203	-0.869756	0.260212	-0.413314	-0.0649016	-0.141841	0.378547	-0.907526	-0.167096	0.2738	-0.229748	0.363461	0.486359	-0.394153	0.34446	0.441072	-0.302159	0.178376	0.636455
-4.46326	-0.0754989	-1.37921	-0.411812	-0.568855	-0.212208	-0.144919	-0.876036	-0.591547	-0.59373	-0.388363	-0.289577	-1.10275	-0.0332494	-0.639858	-0.499932	-0.497995	-0.411578	-0.0351962	-0.372733	-0.403118	-0.208147	-0.539609	-0.69082	-0.359676	0.416275	-0.536139	0.597155	-0.457035	0.0121768	-0.213472	-0.0226932	-0.869672	0.260529	-0.413031	-0.065791	-0.14183	0.379194	-0.908256	-0.166227	0.273876	-0.229039	0.363826	0.485888	-0.394697	0.34413	0.439181	-0.302638	0.178041	0.636042
-4.46228	-0.0750802	-1.37971	-0.410521	-0.567506	-0.212102	-0.14531	-0.875414	-0.592752	-0.592652	-0.388279	-0.290658	-1.10303	-0.0344947	-0.639459	-0.498706	-0.499013	-0.411854	-0.0350873	-0.373303	-0.402363	-0.208589	-0.540011	-0.691933	-0.360219	0.416664	-0.536335	0.598089	-0.457226	0.0130407	-0.213311	-0.0211777	-0.86959	0.260853	-0.412752	-0.0666796	-0.141817	0.379846	-0.908983	-0.165367	0.273961	-0.228333	0.364198	0.485419	-0.395232	0.343808	0.437278	-0.303092	0.177714	0.635634
-4.46129	-0.0746489	-1.3802	-0.409232	-0.566162	-0.212001	-0.145732	-0.874792	-0.59396	-0.591585	-0.388192	-0.291744	-1.10333	-0.0357419	-0.639051	-0.497478	-0.500033	-0.412129	-0.0349845	-0.373876	-0.401616	-0.209029	-0.540408	-0.693049	-0.360771	0.417059	-0.536533	0.599013	-0.457426	0.0138992	-0.213137	-0.0196739	-0.869508	0.261183	-0.412475	-0.0675674	-0.141804	0.380503	-0.909706	-0.164517	0.274056	-0.22763	0.364576	0.484952	-0.39576	0.343492	0.435365	-0.30352	0.177395	0.635229
-4.46031	-0.074205	-1.3807	-0.407942	-0.564826	-0.211905	-0.146185	-0.874169	-0.595172	-0.59053	-0.388103	-0.292834	-1.10362	-0.036991	-0.638635	-0.496248	-0.501054	-0.412404	-0.0348877	-0.37445	-0.400877	-0.209469	-0.540801	-0.694167	-0.361333	0.417459	-0.536732	0.599926	-0.457634	0.0147522	-0.212951	-0.0181816	-0.869428	0.261521	-0.4122	-0.0684541	-0.141789	0.381164	-0.910427	-0.163676	0.27416	-0.22693	0.364962	0.484487	-0.396279	0.343185	0.433441	-0.303923	0.177085	0.634828
-4.45933	-0.0737485	-1.3812	-0.406653	-0.563496	-0.211816	-0.14667	-0.873545	-0.596387	-0.589486	-0.38801	-0.29393	-1.10391	-0.0382418	-0.63821	-0.495016	-0.502077	-0.412677	-0.0347969	-0.375027	-0.400144	-0.209907	-0.541189	-0.695288	-0.361904	0.417866	-0.536934	0.60083	-0.45785	0.0155998	-0.212752	-0.0167009	-0.869349	0.261866	-0.411927	-0.0693397	-0.141773	0.38183	-0.911144	-0.162844	0.274274	-0.226233	0.365355	0.484024	-0.39679	0.342884	0.431507	-0.3043	0.176782	0.63443
-4.45834	-0.0732794	-1.3817	-0.405364	-0.562173	-0.211731	-0.147186	-0.872921	-0.597604	-0.588454	-0.387914	-0.29503	-1.10421	-0.0394944	-0.637776	-0.493781	-0.503102	-0.41295	-0.0347121	-0.375605	-0.39942	-0.210343	-0.541572	-0.69641	-0.362484	0.41828	-0.537137	0.601724	-0.458075	0.0164419	-0.212542	-0.0152316	-0.86927	0.262218	-0.411657	-0.070224	-0.141757	0.382501	-0.911858	-0.162022	0.274397	-0.22554	0.365754	0.483563	-0.397293	0.342591	0.429562	-0.304652	0.176488	0.634037
-4.45736	-0.0727978	-1.38221	-0.404075	-0.560856	-0.211653	-0.147734	-0.872297	-0.598825	-0.587434	-0.387815	-0.296135	-1.10451	-0.0407485	-0.637333	-0.492545	-0.504128	-0.413221	-0.0346334	-0.376185	-0.398702	-0.210779	-0.54195	-0.697535	-0.363073	0.4187	-0.537342	0.602608	-0.458308	0.0172785	-0.212319	-0.0137738	-0.869193	0.262577	-0.411388	-0.0711071	-0.141739	0.383176	-0.912569	-0.161209	0.274529	-0.22485	0.36616	0.483105	-0.397788	0.342305	0.427606	-0.304977	0.176202	0.633647
-4.45638	-0.0723037	-1.38272	-0.402786	-0.559547	-0.21158	-0.148313	-0.871673	-0.600049	-0.586425	-0.387713	-0.297244	-1.10481	-0.0420041	-0.636882	-0.491307	-0.505155	-0.413491	-0.0345608	-0.376767	-0.397993	-0.211212	-0.542323	-0.698661	-0.363671	0.419127	-0.537549	0.603481	-0.458548	0.0181095	-0.212084	-0.0123274	-0.869117	0.262942	-0.411122	-0.0719886	-0.14172	0.383857	-0.913277	-0.160406	0.27467	-0.224164	0.366573	0.48265	-0.398274	0.342026	0.425641	-0.305276	0.175925	0.63326
-4.4554	-0.0717972	-1.38323	-0.401498	-0.558244	-0.211513	-0.148923	-0.871048	-0.601276	-0.585428	-0.387608	-0.298357	-1.10511	-0.0432611	-0.636422	-0.490066	-0.506183	-0.413761	-0.0344943	-0.377351	-0.397291	-0.211644	-0.54269	-0.699788	-0.364278	0.41956	-0.537758	0.604345	-0.458797	0.0189349	-0.211836	-0.0108923	-0.869042	0.263314	-0.410857	-0.0728687	-0.1417	0.384542	-0.913982	-0.159614	0.27482	-0.223482	0.366993	0.482197	-0.398752	0.341755	0.423664	-0.305549	0.175655	0.632878
-4.45441	-0.0712782	-1.38374	-0.40021	-0.556948	-0.211451	-0.149564	-0.870423	-0.602506	-0.584443	-0.387499	-0.299475	-1.10541	-0.0445195	-0.635953	-0.488824	-0.507212	-0.414029	-0.0344339	-0.377936	-0.396596	-0.212075	-0.543053	-0.700917	-0.364894	0.420001	-0.537968	0.605198	-0.459054	0.0197547	-0.211575	-0.00946844	-0.868968	0.263693	-0.410594	-0.0737471	-0.14168	0.385232	-0.914683	-0.158831	0.274979	-0.222804	0.367419	0.481747	-0.399221	0.341491	0.421678	-0.305796	0.175393	0.632499
-4.45343	-0.0707469	-1.38425	-0.398922	-0.55566	-0.211394	-0.150237	-0.869797	-0.603738	-0.58347	-0.387387	-0.300597	-1.10571	-0.045779	-0.635476	-0.487581	-0.508242	-0.414296	-0.0343796	-0.378522	-0.395909	-0.212504	-0.54341	-0.702048	-0.365519	0.420448	-0.538181	0.606042	-0.459318	0.0205689	-0.211303	-0.00805584	-0.868895	0.264078	-0.410333	-0.0746237	-0.141658	0.385927	-0.915382	-0.158058	0.275146	-0.22213	0.367852	0.481299	-0.399681	0.341235	0.419681	-0.306016	0.17514	0.632124
-4.45245	-0.0702032	-1.38477	-0.397635	-0.554378	-0.211343	-0.15094	-0.869171	-0.604973	-0.582508	-0.387272	-0.301723	-1.10602	-0.0470396	-0.63499	-0.486335	-0.509273	-0.414561	-0.0343314	-0.37911	-0.395229	-0.212931	-0.543761	-0.703179	-0.366152	0.420903	-0.538395	0.606876	-0.45959	0.0213773	-0.211017	-0.0066544	-0.868823	0.26447	-0.410073	-0.0754984	-0.141636	0.386627	-0.916077	-0.157295	0.275322	-0.221461	0.368291	0.480855	-0.400133	0.340986	0.417674	-0.30621	0.174894	0.631753
-4.45146	-0.0696472	-1.38529	-0.396347	-0.553103	-0.211297	-0.151675	-0.868545	-0.606211	-0.581559	-0.387153	-0.302852	-1.10632	-0.0483013	-0.634496	-0.485089	-0.510304	-0.414825	-0.0342894	-0.379699	-0.394557	-0.213357	-0.544107	-0.704311	-0.366794	0.421365	-0.538611	0.607699	-0.459869	0.0221801	-0.210719	-0.00526405	-0.868751	0.264868	-0.409814	-0.0763711	-0.141613	0.387332	-0.916769	-0.156543	0.275506	-0.220795	0.368737	0.480413	-0.400576	0.340744	0.415657	-0.306377	0.174656	0.631385
-4.45048	-0.069079	-1.38581	-0.39506	-0.551836	-0.211256	-0.15244	-0.867918	-0.607451	-0.580622	-0.38703	-0.303986	-1.10663	-0.0495639	-0.633993	-0.483841	-0.511337	-0.415088	-0.0342535	-0.380289	-0.393893	-0.21378	-0.544447	-0.705444	-0.367445	0.421835	-0.538829	0.608513	-0.460156	0.0229772	-0.210408	-0.00388475	-0.868681	0.265272	-0.409557	-0.0772418	-0.141589	0.388042	-0.917458	-0.155801	0.275698	-0.220135	0.36919	0.479975	-0.40101	0.340509	0.41363	-0.306517	0.174426	0.63102
-4.4495	-0.0684986	-1.38633	-0.393773	-0.550576	-0.211221	-0.153236	-0.867291	-0.608693	-0.579697	-0.386905	-0.305123	-1.10694	-0.0508274	-0.633481	-0.482591	-0.51237	-0.415349	-0.0342238	-0.38088	-0.393236	-0.214202	-0.544782	-0.706578	-0.368104	0.422313	-0.539049	0.609316	-0.46045	0.0237685	-0.210084	-0.00251641	-0.868611	0.265683	-0.409301	-0.0781102	-0.141564	0.388757	-0.918144	-0.15507	0.275898	-0.219479	0.369648	0.47954	-0.401435	0.340282	0.411593	-0.30663	0.174204	0.63066
-4.44851	-0.0679061	-1.38685	-0.392486	-0.549323	-0.21119	-0.154062	-0.866664	-0.609938	-0.578785	-0.386775	-0.306263	-1.10725	-0.0520916	-0.632961	-0.48134	-0.513403	-0.415609	-0.0342002	-0.381472	-0.392587	-0.214622	-0.54511	-0.707713	-0.368771	0.422798	-0.539271	0.61011	-0.460751	0.024554	-0.209747	-0.00115899	-0.868542	0.266099	-0.409045	-0.0789763	-0.141539	0.389477	-0.918827	-0.154349	0.276106	-0.218828	0.370113	0.479108	-0.401851	0.340062	0.409546	-0.306716	0.173989	0.630302
-4.44753	-0.0673014	-1.38737	-0.391199	-0.548077	-0.211165	-0.15492	-0.866037	-0.611185	-0.577884	-0.386643	-0.307407	-1.10756	-0.0533565	-0.632433	-0.480088	-0.514437	-0.415867	-0.0341828	-0.382065	-0.391945	-0.21504	-0.545433	-0.708847	-0.369447	0.423292	-0.539494	0.610894	-0.46106	0.0253337	-0.209397	0.0001876	-0.868474	0.266522	-0.408791	-0.07984	-0.141513	0.390201	-0.919506	-0.153639	0.276322	-0.218182	0.370584	0.47868	-0.402257	0.33985	0.407489	-0.306775	0.173783	0.629949
-4.44655	-0.0666847	-1.3879	-0.389912	-0.546839	-0.211145	-0.155807	-0.86541	-0.612435	-0.576996	-0.386506	-0.308554	-1.10787	-0.054622	-0.631896	-0.478835	-0.515471	-0.416124	-0.0341716	-0.382659	-0.391311	-0.215457	-0.54575	-0.709982	-0.370131	0.423793	-0.539719	0.611667	-0.461375	0.0261076	-0.209034	0.00152342	-0.868407	0.26695	-0.408537	-0.0807012	-0.141487	0.390931	-0.920183	-0.15294	0.276545	-0.217541	0.371061	0.478255	-0.402655	0.339645	0.405423	-0.306806	0.173583	0.629599
-4.44557	-0.0660559	-1.38843	-0.388625	-0.545608	-0.211129	-0.156725	-0.864782	-0.613686	-0.57612	-0.386366	-0.309704	-1.10818	-0.0558879	-0.631351	-0.477582	-0.516506	-0.416379	-0.0341666	-0.383254	-0.390685	-0.215871	-0.546061	-0.711117	-0.370823	0.424303	-0.539947	0.612431	-0.461697	0.0268756	-0.208658	0.00284854	-0.86834	0.267384	-0.408284	-0.0815597	-0.14146	0.391666	-0.920856	-0.152252	0.276776	-0.216905	0.371545	0.477833	-0.403043	0.339447	0.403347	-0.306811	0.173392	0.629252
-4.44458	-0.0654153	-1.38895	-0.387338	-0.544384	-0.211119	-0.157673	-0.864154	-0.61494	-0.575257	-0.386222	-0.310857	-1.10849	-0.0571543	-0.630797	-0.476327	-0.51754	-0.416632	-0.0341678	-0.383848	-0.390066	-0.216283	-0.546366	-0.712252	-0.371524	0.424822	-0.540176	0.613185	-0.462026	0.0276378	-0.208269	0.00416303	-0.868274	0.267824	-0.408032	-0.0824155	-0.141432	0.392406	-0.921526	-0.151574	0.277014	-0.216275	0.372034	0.477416	-0.403422	0.339256	0.401261	-0.306788	0.173208	0.628908
-4.4436	-0.0647627	-1.38948	-0.386052	-0.543168	-0.211113	-0.158652	-0.863526	-0.616195	-0.574406	-0.386074	-0.312014	-1.1088	-0.058421	-0.630235	-0.475071	-0.518575	-0.416883	-0.0341752	-0.384444	-0.389455	-0.216693	-0.546665	-0.713386	-0.372232	0.425348	-0.540407	0.613929	-0.462362	0.0283941	-0.207867	0.00546698	-0.868209	0.268269	-0.40778	-0.0832684	-0.141404	0.393152	-0.922193	-0.150908	0.277259	-0.21565	0.372529	0.477002	-0.403792	0.339073	0.399166	-0.306737	0.173032	0.628568
-4.44262	-0.0640984	-1.39001	-0.384765	-0.54196	-0.211113	-0.15966	-0.862897	-0.617453	-0.573568	-0.385923	-0.313173	-1.10911	-0.059688	-0.629665	-0.473815	-0.519609	-0.417132	-0.0341888	-0.38504	-0.388851	-0.217101	-0.546957	-0.714521	-0.372948	0.425884	-0.54064	0.614663	-0.462704	0.0291444	-0.207452	0.00676046	-0.868144	0.26872	-0.407528	-0.0841184	-0.141375	0.393902	-0.922857	-0.150253	0.277511	-0.215031	0.37303	0.476592	-0.404152	0.338897	0.397062	-0.306659	0.172863	0.628232
-4.44163	-0.0634222	-1.39054	-0.383479	-0.540759	-0.211117	-0.160698	-0.862269	-0.618712	-0.572742	-0.385768	-0.314334	-1.10942	-0.0609551	-0.629086	-0.472558	-0.520644	-0.41738	-0.0342086	-0.385636	-0.388255	-0.217507	-0.547244	-0.715654	-0.373672	0.426428	-0.540874	0.615387	-0.463052	0.0298888	-0.207024	0.00804354	-0.86808	0.269176	-0.407277	-0.0849653	-0.141346	0.394657	-0.923518	-0.14961	0.27777	-0.214417	0.373537	0.476186	-0.404503	0.338728	0.394948	-0.306553	0.172701	0.627898
-4.44065	-0.0627344	-1.39108	-0.382193	-0.539566	-0.211125	-0.161766	-0.86164	-0.619973	-0.571929	-0.385609	-0.315499	-1.10974	-0.0622222	-0.628499	-0.4713	-0.521678	-0.417625	-0.0342346	-0.386232	-0.387667	-0.21791	-0.547523	-0.716787	-0.374403	0.426982	-0.541111	0.616102	-0.463407	0.0306273	-0.206582	0.00931631	-0.868016	0.269637	-0.407025	-0.085809	-0.141317	0.395418	-0.924175	-0.148978	0.278035	-0.21381	0.37405	0.475783	-0.404844	0.338566	0.392825	-0.306419	0.172547	0.627568
-4.43967	-0.062035	-1.39161	-0.380906	-0.53838	-0.211139	-0.162864	-0.861011	-0.621235	-0.571128	-0.385446	-0.316666	-1.11005	-0.0634894	-0.627905	-0.470042	-0.522712	-0.417869	-0.0342669	-0.386828	-0.387086	-0.218312	-0.547797	-0.717919	-0.375142	0.427544	-0.54135	0.616806	-0.463768	0.0313598	-0.206127	0.0105788	-0.867953	0.270104	-0.406774	-0.0866494	-0.141287	0.396184	-0.92483	-0.148357	0.278308	-0.213208	0.374569	0.475385	-0.405175	0.338412	0.390693	-0.306257	0.172401	0.627241
-4.43868	-0.0613239	-1.39214	-0.37962	-0.537203	-0.211157	-0.163991	-0.860382	-0.6225	-0.57034	-0.385279	-0.317835	-1.11036	-0.0647565	-0.627302	-0.468784	-0.523746	-0.41811	-0.0343053	-0.387425	-0.386512	-0.218711	-0.548064	-0.71905	-0.375889	0.428116	-0.54159	0.617501	-0.464135	0.0320862	-0.205659	0.0118312	-0.86789	0.270575	-0.406522	-0.0874864	-0.141257	0.396955	-0.925481	-0.147748	0.278586	-0.212613	0.375093	0.474992	-0.405496	0.338265	0.388552	-0.306068	0.172261	0.626918
-4.4377	-0.0606014	-1.39268	-0.378333	-0.536033	-0.211179	-0.165148	-0.859753	-0.623765	-0.569565	-0.385108	-0.319006	-1.11067	-0.0660234	-0.626691	-0.467525	-0.524779	-0.41835	-0.0343499	-0.388021	-0.385946	-0.219108	-0.548324	-0.72018	-0.376643	0.428696	-0.541833	0.618186	-0.464508	0.0328067	-0.205177	0.0130736	-0.867827	0.271052	-0.40627	-0.0883199	-0.141227	0.397731	-0.92613	-0.14715	0.278871	-0.212023	0.375622	0.474602	-0.405808	0.338125	0.386402	-0.30585	0.172129	0.626597
-4.43672	-0.0598675	-1.39321	-0.377047	-0.53487	-0.211206	-0.166333	-0.859124	-0.625033	-0.568802	-0.384933	-0.32018	-1.11098	-0.0672901	-0.626071	-0.466267	-0.525812	-0.418587	-0.0344008	-0.388617	-0.385388	-0.219502	-0.548578	-0.721309	-0.377404	0.429287	-0.542077	0.618861	-0.464887	0.0335212	-0.204682	0.0143059	-0.867765	0.271533	-0.406018	-0.0891498	-0.141197	0.398512	-0.926775	-0.146565	0.279162	-0.211441	0.376158	0.474217	-0.40611	0.337993	0.384243	-0.305604	0.172004	0.62628
-4.43574	-0.0591221	-1.39374	-0.375761	-0.533716	-0.211237	-0.167548	-0.858495	-0.626301	-0.568053	-0.384754	-0.321356	-1.11129	-0.0685565	-0.625444	-0.465008	-0.526844	-0.418822	-0.0344578	-0.389212	-0.384838	-0.219894	-0.548825	-0.722436	-0.378173	0.429887	-0.542323	0.619527	-0.465271	0.0342296	-0.204174	0.0155284	-0.867703	0.272019	-0.405765	-0.089976	-0.141166	0.399299	-0.927417	-0.145991	0.279459	-0.210864	0.376698	0.473836	-0.406402	0.337867	0.382076	-0.305331	0.171885	0.625965
-4.43475	-0.0583656	-1.39428	-0.374474	-0.53257	-0.211273	-0.168792	-0.857866	-0.627571	-0.567316	-0.384571	-0.322533	-1.1116	-0.0698225	-0.624809	-0.463749	-0.527876	-0.419054	-0.0345211	-0.389808	-0.384294	-0.220283	-0.549065	-0.723562	-0.378948	0.430497	-0.542572	0.620182	-0.465661	0.034932	-0.203652	0.0167411	-0.867641	0.272509	-0.405512	-0.0907984	-0.141135	0.400091	-0.928057	-0.145429	0.279762	-0.210294	0.377244	0.47346	-0.406683	0.337749	0.379899	-0.305029	0.171774	0.625654
-4.43377	-0.0575978	-1.39481	-0.373188	-0.531431	-0.211312	-0.170065	-0.857237	-0.628842	-0.566592	-0.384384	-0.323713	-1.11191	-0.071088	-0.624166	-0.46249	-0.528906	-0.419285	-0.0345905	-0.390403	-0.383759	-0.22067	-0.549299	-0.724686	-0.379731	0.431116	-0.542822	0.620829	-0.466056	0.0356283	-0.203116	0.017944	-0.867579	0.273004	-0.405258	-0.0916169	-0.141104	0.400888	-0.928693	-0.144879	0.280071	-0.209731	0.377795	0.473088	-0.406955	0.337638	0.377714	-0.304698	0.17167	0.625346
-4.43279	-0.0568188	-1.39535	-0.371901	-0.530301	-0.211356	-0.171366	-0.856608	-0.630114	-0.565881	-0.384193	-0.324894	-1.11222	-0.0723529	-0.623516	-0.461231	-0.529936	-0.419513	-0.0346662	-0.390997	-0.38323	-0.221055	-0.549525	-0.725808	-0.38052	0.431746	-0.543074	0.621465	-0.466457	0.0363185	-0.202568	0.0191374	-0.867517	0.273503	-0.405003	-0.0924313	-0.141073	0.40169	-0.929326	-0.144341	0.280385	-0.209175	0.378352	0.472721	-0.407217	0.337534	0.375521	-0.30434	0.171573	0.62504
-4.4318	-0.0560289	-1.39589	-0.370615	-0.529179	-0.211404	-0.172696	-0.855978	-0.631388	-0.565182	-0.383997	-0.326077	-1.11252	-0.0736172	-0.622857	-0.459973	-0.530965	-0.419739	-0.034748	-0.391591	-0.38271	-0.221437	-0.549745	-0.726928	-0.381317	0.432386	-0.543328	0.622092	-0.466863	0.0370026	-0.202005	0.0203212	-0.867455	0.274006	-0.404748	-0.0932415	-0.141042	0.402498	-0.929956	-0.143815	0.280705	-0.208626	0.378913	0.472359	-0.407468	0.337438	0.373319	-0.303953	0.171483	0.624738
-4.43082	-0.0552279	-1.39642	-0.369328	-0.528064	-0.211457	-0.174054	-0.855349	-0.632662	-0.564497	-0.383797	-0.327262	-1.11283	-0.0748809	-0.622191	-0.458714	-0.531993	-0.419962	-0.034836	-0.392184	-0.382197	-0.221816	-0.549958	-0.728045	-0.38212	0.433036	-0.543584	0.622709	-0.467274	0.0376807	-0.201429	0.0214956	-0.867393	0.274513	-0.404491	-0.0940476	-0.141011	0.403311	-0.930583	-0.143301	0.28103	-0.208084	0.37948	0.472001	-0.407709	0.337348	0.37111	-0.303538	0.171399	0.624438
-4.42984	-0.0544161	-1.39696	-0.368041	-0.526958	-0.211513	-0.17544	-0.85472	-0.633938	-0.563824	-0.383593	-0.328448	-1.11313	-0.0761437	-0.621517	-0.457457	-0.533021	-0.420183	-0.0349302	-0.392776	-0.381691	-0.222192	-0.550164	-0.729161	-0.382929	0.433696	-0.543842	0.623317	-0.46769	0.0383526	-0.20084	0.0226607	-0.867331	0.275024	-0.404234	-0.0948493	-0.14098	0.404129	-0.931207	-0.1428	0.28136	-0.207549	0.380051	0.471648	-0.40794	0.337265	0.368891	-0.303094	0.171322	0.624141
-4.42885	-0.0535935	-1.39749	-0.366754	-0.52586	-0.211573	-0.176854	-0.854091	-0.635214	-0.563165	-0.383385	-0.329635	-1.11344	-0.0774057	-0.620835	-0.456199	-0.534046	-0.420401	-0.0350305	-0.393367	-0.381192	-0.222566	-0.550362	-0.730274	-0.383745	0.434367	-0.544102	0.623915	-0.46811	0.0390184	-0.200237	0.0238166	-0.867269	0.275539	-0.403975	-0.0956465	-0.140949	0.404952	-0.931828	-0.142311	0.281695	-0.207022	0.380628	0.471301	-0.40816	0.33719	0.366665	-0.302622	0.171252	0.623847
-4.42787	-0.0527601	-1.39803	-0.365467	-0.524771	-0.211637	-0.178296	-0.853461	-0.636491	-0.562518	-0.383172	-0.330823	-1.11374	-0.0786669	-0.620146	-0.454942	-0.535071	-0.420617	-0.035137	-0.393957	-0.380702	-0.222937	-0.550554	-0.731384	-0.384568	0.435048	-0.544365	0.624504	-0.468536	0.039678	-0.199621	0.0249634	-0.867207	0.276058	-0.403714	-0.0964392	-0.140918	0.405781	-0.932446	-0.141835	0.282035	-0.206502	0.381209	0.470958	-0.40837	0.337122	0.364431	-0.302121	0.171188	0.623556
-4.42689	-0.0519162	-1.39857	-0.36418	-0.523689	-0.211705	-0.179766	-0.852832	-0.637768	-0.561885	-0.382955	-0.332013	-1.11404	-0.079927	-0.619449	-0.453686	-0.536095	-0.42083	-0.0352496	-0.394546	-0.380218	-0.223306	-0.550738	-0.732492	-0.385396	0.43574	-0.544629	0.625083	-0.468966	0.0403315	-0.19899	0.0261011	-0.867144	0.27658	-0.403453	-0.0972272	-0.140887	0.406616	-0.933061	-0.141371	0.282379	-0.205989	0.381795	0.47062	-0.40857	0.33706	0.362189	-0.301591	0.171131	0.623267
-4.4259	-0.0510617	-1.3991	-0.362892	-0.522616	-0.211776	-0.181263	-0.852203	-0.639047	-0.561264	-0.382733	-0.333204	-1.11434	-0.0811861	-0.618745	-0.452431	-0.537117	-0.421041	-0.0353684	-0.395134	-0.379742	-0.223671	-0.550916	-0.733596	-0.386231	0.436443	-0.544895	0.625653	-0.4694	0.0409789	-0.198347	0.02723	-0.867081	0.277105	-0.403189	-0.0980105	-0.140857	0.407455	-0.933673	-0.140919	0.282729	-0.205484	0.382386	0.470287	-0.408758	0.337006	0.35994	-0.301033	0.171081	0.622981
-4.42492	-0.0501967	-1.39964	-0.361605	-0.521551	-0.211851	-0.182788	-0.851575	-0.640326	-0.560657	-0.382507	-0.334396	-1.11463	-0.082444	-0.618034	-0.451176	-0.538137	-0.421249	-0.0354932	-0.395721	-0.379273	-0.224034	-0.551085	-0.734698	-0.387072	0.437157	-0.545163	0.626214	-0.469839	0.0416201	-0.19769	0.02835	-0.867017	0.277634	-0.402924	-0.0987889	-0.140826	0.4083	-0.934282	-0.140481	0.283082	-0.204987	0.382982	0.46996	-0.408937	0.336959	0.357682	-0.300447	0.171037	0.622697
-4.42394	-0.0493214	-1.40017	-0.360317	-0.520495	-0.21193	-0.184339	-0.850946	-0.641605	-0.560062	-0.382277	-0.335588	-1.11493	-0.0837008	-0.617315	-0.449922	-0.539157	-0.421454	-0.0356242	-0.396306	-0.378812	-0.224394	-0.551248	-0.735796	-0.387919	0.437881	-0.545433	0.626765	-0.470281	0.0422552	-0.197019	0.0294613	-0.866953	0.278166	-0.402658	-0.0995624	-0.140796	0.40915	-0.934888	-0.140055	0.28344	-0.204498	0.383581	0.469638	-0.409104	0.336919	0.355418	-0.299831	0.170999	0.622416
-4.42296	-0.0484359	-1.4007	-0.359029	-0.519446	-0.212013	-0.185918	-0.850317	-0.642885	-0.559481	-0.382042	-0.336782	-1.11522	-0.0849563	-0.616588	-0.44867	-0.540174	-0.421657	-0.0357612	-0.39689	-0.378358	-0.224751	-0.551403	-0.736891	-0.388771	0.438617	-0.545706	0.627307	-0.470728	0.042884	-0.196334	0.0305641	-0.866888	0.278701	-0.402389	-0.100331	-0.140766	0.410006	-0.935491	-0.139642	0.283802	-0.204016	0.384186	0.469321	-0.409261	0.336885	0.353145	-0.299187	0.170967	0.622137
-4.42197	-0.0475401	-1.40124	-0.357741	-0.518407	-0.212098	-0.187523	-0.849689	-0.644166	-0.558912	-0.381802	-0.337976	-1.11551	-0.0862105	-0.615855	-0.447418	-0.54119	-0.421857	-0.0359044	-0.397473	-0.377911	-0.225105	-0.551551	-0.737982	-0.389629	0.439364	-0.54598	0.62784	-0.471179	0.0435068	-0.195636	0.0316583	-0.866823	0.279239	-0.402119	-0.101094	-0.140737	0.410866	-0.936091	-0.139241	0.284168	-0.203543	0.384795	0.469009	-0.409407	0.336859	0.350866	-0.298515	0.170942	0.621861
-4.42099	-0.0466344	-1.40177	-0.356453	-0.517376	-0.212187	-0.189155	-0.849061	-0.645446	-0.558357	-0.381558	-0.339171	-1.1158	-0.0874634	-0.615114	-0.446167	-0.542205	-0.422054	-0.0360536	-0.398053	-0.377471	-0.225456	-0.551692	-0.73907	-0.390493	0.440123	-0.546257	0.628364	-0.471633	0.0441233	-0.194925	0.0327442	-0.866757	0.279779	-0.401847	-0.101852	-0.140707	0.411733	-0.936688	-0.138854	0.284538	-0.203078	0.385408	0.468703	-0.409542	0.33684	0.348579	-0.297813	0.170923	0.621587
-4.42001	-0.0457186	-1.4023	-0.355164	-0.516353	-0.21228	-0.190813	-0.848433	-0.646727	-0.557815	-0.38131	-0.340366	-1.11609	-0.0887148	-0.614366	-0.444918	-0.543218	-0.422248	-0.0362088	-0.398632	-0.377039	-0.225804	-0.551824	-0.740153	-0.391362	0.440893	-0.546535	0.628878	-0.472091	0.0447337	-0.1942	0.0338218	-0.86669	0.280322	-0.401572	-0.102605	-0.140679	0.412604	-0.937282	-0.13848	0.284912	-0.202621	0.386025	0.468402	-0.409666	0.336827	0.346285	-0.297083	0.17091	0.621315
-4.41902	-0.044793	-1.40284	-0.353875	-0.515339	-0.212376	-0.192498	-0.847805	-0.648008	-0.557286	-0.381056	-0.341562	-1.11637	-0.0899646	-0.613612	-0.44367	-0.544228	-0.422439	-0.03637	-0.39921	-0.376614	-0.226148	-0.55195	-0.741233	-0.392237	0.441674	-0.546816	0.629384	-0.472553	0.0453379	-0.193461	0.0348913	-0.866622	0.280868	-0.401295	-0.103352	-0.14065	0.413481	-0.937874	-0.138118	0.285289	-0.202173	0.386647	0.468107	-0.40978	0.336822	0.343985	-0.296325	0.170903	0.621046
-4.41804	-0.0438576	-1.40337	-0.352586	-0.514334	-0.212475	-0.194208	-0.847178	-0.649289	-0.55677	-0.380798	-0.342758	-1.11665	-0.091213	-0.61285	-0.442423	-0.545237	-0.422628	-0.0365373	-0.399785	-0.376196	-0.22649	-0.552068	-0.742309	-0.393117	0.442467	-0.547099	0.62988	-0.473018	0.0459359	-0.192709	0.0359528	-0.866553	0.281415	-0.401016	-0.104093	-0.140622	0.414364	-0.938462	-0.13777	0.28567	-0.201733	0.387272	0.467817	-0.409882	0.336823	0.341677	-0.295537	0.170901	0.620778
-4.41706	-0.0429126	-1.4039	-0.351297	-0.513337	-0.212577	-0.195944	-0.84655	-0.650571	-0.556267	-0.380535	-0.343954	-1.11693	-0.0924596	-0.612081	-0.441178	-0.546244	-0.422813	-0.0367105	-0.400359	-0.375785	-0.226829	-0.552178	-0.743381	-0.394002	0.443272	-0.547384	0.630367	-0.473486	0.0465277	-0.191943	0.0370063	-0.866483	0.281965	-0.400734	-0.104829	-0.140595	0.415251	-0.939048	-0.137435	0.286054	-0.201302	0.387902	0.467533	-0.409973	0.336831	0.339363	-0.294721	0.170906	0.620513
-4.41607	-0.0419581	-1.40442	-0.350008	-0.512349	-0.212682	-0.197706	-0.845924	-0.651852	-0.555777	-0.380268	-0.34515	-1.11721	-0.0937046	-0.611305	-0.439934	-0.547249	-0.422996	-0.0368897	-0.40093	-0.375381	-0.227164	-0.552281	-0.744448	-0.394892	0.444089	-0.547671	0.630845	-0.473957	0.0471133	-0.191164	0.038052	-0.866412	0.282517	-0.40045	-0.105559	-0.140568	0.416144	-0.93963	-0.137113	0.286442	-0.200879	0.388536	0.467254	-0.410053	0.336846	0.337042	-0.293876	0.170916	0.62025
-4.41509	-0.0409941	-1.40495	-0.348718	-0.511369	-0.21279	-0.199493	-0.845297	-0.653133	-0.5553	-0.379995	-0.346347	-1.11748	-0.0949479	-0.610523	-0.438692	-0.548252	-0.423176	-0.0370748	-0.401499	-0.374984	-0.227496	-0.552376	-0.74551	-0.395787	0.444917	-0.54796	0.631315	-0.474431	0.0476928	-0.190371	0.0390901	-0.86634	0.283071	-0.400163	-0.106284	-0.140542	0.417043	-0.94021	-0.136805	0.286832	-0.200466	0.389173	0.466981	-0.410122	0.336868	0.334715	-0.293002	0.170933	0.619989
-4.41411	-0.0400207	-1.40548	-0.347428	-0.510399	-0.212901	-0.201305	-0.844671	-0.654414	-0.554836	-0.379718	-0.347543	-1.11775	-0.0961893	-0.609733	-0.437451	-0.549253	-0.423353	-0.0372658	-0.402066	-0.374595	-0.227825	-0.552463	-0.746568	-0.396686	0.445758	-0.548252	0.631775	-0.474909	0.0482661	-0.189565	0.0401206	-0.866267	0.283626	-0.399874	-0.107002	-0.140516	0.417946	-0.940787	-0.136509	0.287226	-0.200061	0.389814	0.466714	-0.41018	0.336896	0.332381	-0.2921	0.170954	0.619729
-4.41313	-0.0390381	-1.40601	-0.346137	-0.509437	-0.213015	-0.203142	-0.844045	-0.655695	-0.554386	-0.379436	-0.34874	-1.11802	-0.0974289	-0.608937	-0.436213	-0.550252	-0.423526	-0.0374628	-0.402631	-0.374212	-0.228151	-0.552543	-0.747621	-0.397591	0.446611	-0.548545	0.632227	-0.475388	0.0488332	-0.188745	0.0411437	-0.866192	0.284183	-0.399581	-0.107714	-0.140491	0.418856	-0.941361	-0.136228	0.287622	-0.199665	0.390459	0.466453	-0.410226	0.336931	0.330042	-0.291168	0.170982	0.619472
-4.41214	-0.0380465	-1.40653	-0.344846	-0.508484	-0.213131	-0.205004	-0.843419	-0.656975	-0.553948	-0.379149	-0.349936	-1.11828	-0.0986666	-0.608135	-0.434976	-0.551248	-0.423697	-0.0376656	-0.403194	-0.373837	-0.228473	-0.552615	-0.74867	-0.398499	0.447476	-0.548841	0.63267	-0.475871	0.0493942	-0.187912	0.0421594	-0.866115	0.284742	-0.399286	-0.108421	-0.140466	0.41977	-0.941932	-0.135959	0.288021	-0.199278	0.391108	0.466197	-0.410262	0.336973	0.327696	-0.290209	0.171015	0.619216
-4.41116	-0.0370458	-1.40705	-0.343555	-0.507539	-0.213251	-0.20689	-0.842794	-0.658255	-0.553523	-0.378858	-0.351132	-1.11854	-0.0999023	-0.607326	-0.433741	-0.552242	-0.423864	-0.0378742	-0.403754	-0.373468	-0.228792	-0.552679	-0.749713	-0.399413	0.448353	-0.549139	0.633104	-0.476355	0.0499489	-0.187066	0.043168	-0.866037	0.285301	-0.398988	-0.10912	-0.140442	0.42069	-0.942501	-0.135704	0.288422	-0.1989	0.391759	0.465948	-0.410286	0.337022	0.325344	-0.28922	0.171053	0.618963
-4.41018	-0.0360363	-1.40758	-0.342264	-0.506604	-0.213373	-0.208801	-0.842169	-0.659535	-0.553112	-0.378561	-0.352328	-1.1188	-0.101136	-0.60651	-0.432508	-0.553234	-0.424029	-0.0380887	-0.404312	-0.373106	-0.229108	-0.552735	-0.75075	-0.40033	0.449242	-0.549439	0.63353	-0.476842	0.0504976	-0.186206	0.0441694	-0.865958	0.285862	-0.398686	-0.109814	-0.140419	0.421615	-0.943066	-0.135463	0.288826	-0.198531	0.392415	0.465704	-0.410298	0.337077	0.322986	-0.288203	0.171097	0.618711
-4.40919	-0.0350179	-1.4081	-0.340972	-0.505677	-0.213497	-0.210736	-0.841545	-0.660814	-0.552713	-0.37826	-0.353524	-1.11905	-0.102367	-0.605688	-0.431277	-0.554223	-0.42419	-0.0383089	-0.404867	-0.372752	-0.22942	-0.552784	-0.751783	-0.401251	0.450144	-0.549742	0.633947	-0.477331	0.05104	-0.185333	0.045164	-0.865876	0.286423	-0.398382	-0.110501	-0.140397	0.422546	-0.943629	-0.135235	0.289232	-0.198172	0.393074	0.465466	-0.410299	0.337139	0.320623	-0.287157	0.171146	0.61846
-4.40821	-0.033991	-1.40862	-0.33968	-0.50476	-0.213624	-0.212694	-0.840921	-0.662093	-0.552328	-0.377953	-0.354718	-1.1193	-0.103597	-0.60486	-0.430048	-0.55521	-0.424349	-0.0385349	-0.405419	-0.372404	-0.229729	-0.552825	-0.75281	-0.402177	0.451059	-0.550046	0.634356	-0.477823	0.0515763	-0.184447	0.0461517	-0.865793	0.286986	-0.398074	-0.111182	-0.140375	0.423482	-0.944189	-0.13502	0.28964	-0.197822	0.393736	0.465234	-0.410289	0.337207	0.318254	-0.286083	0.1712	0.618211
-4.40723	-0.0329555	-1.40913	-0.338387	-0.503851	-0.213753	-0.214676	-0.840298	-0.663371	-0.551955	-0.377641	-0.355913	-1.11954	-0.104824	-0.604025	-0.428821	-0.556195	-0.424504	-0.0387667	-0.405968	-0.372063	-0.230035	-0.552857	-0.753831	-0.403107	0.451986	-0.550353	0.634756	-0.478316	0.0521065	-0.183547	0.0471328	-0.865708	0.287549	-0.397762	-0.111856	-0.140354	0.424423	-0.944746	-0.134819	0.290051	-0.197482	0.394401	0.465009	-0.410267	0.337282	0.31588	-0.28498	0.171259	0.617964
-4.40624	-0.0319116	-1.40965	-0.337094	-0.502951	-0.213885	-0.216681	-0.839675	-0.664648	-0.551596	-0.377325	-0.357107	-1.11978	-0.106049	-0.603184	-0.427597	-0.557176	-0.424656	-0.0390041	-0.406515	-0.371728	-0.230337	-0.552882	-0.754846	-0.40404	0.452926	-0.550663	0.635147	-0.47881	0.0526305	-0.182634	0.0481072	-0.865621	0.288112	-0.397447	-0.112524	-0.140335	0.42537	-0.945301	-0.134632	0.290463	-0.197151	0.395069	0.464789	-0.410234	0.337364	0.3135	-0.283849	0.171323	0.617718
-4.40526	-0.0308594	-1.41017	-0.335801	-0.502061	-0.214019	-0.21871	-0.839053	-0.665925	-0.551249	-0.377003	-0.3583	-1.12002	-0.107272	-0.602337	-0.426375	-0.558155	-0.424805	-0.0392472	-0.407059	-0.371401	-0.230635	-0.5529	-0.755856	-0.404977	0.453878	-0.550974	0.63553	-0.479307	0.0531484	-0.181708	0.0490753	-0.865532	0.288676	-0.397129	-0.113184	-0.140315	0.426322	-0.945852	-0.134459	0.290877	-0.19683	0.395741	0.464575	-0.410189	0.337452	0.311115	-0.282689	0.171393	0.617473
-4.40428	-0.0297991	-1.41068	-0.334507	-0.501179	-0.214155	-0.220761	-0.838431	-0.667201	-0.550916	-0.376677	-0.359492	-1.12025	-0.108492	-0.601484	-0.425155	-0.559132	-0.42495	-0.039496	-0.4076	-0.37108	-0.23093	-0.552909	-0.756859	-0.405917	0.454844	-0.551288	0.635905	-0.479804	0.0536602	-0.180769	0.0500371	-0.86544	0.28924	-0.396807	-0.113838	-0.140297	0.427279	-0.946401	-0.134299	0.291293	-0.196518	0.396415	0.464367	-0.410132	0.337546	0.308725	-0.2815	0.171467	0.61723
-4.40329	-0.0287307	-1.41119	-0.333213	-0.500307	-0.214294	-0.222835	-0.83781	-0.668476	-0.550595	-0.376345	-0.360684	-1.12048	-0.10971	-0.600625	-0.423938	-0.560106	-0.425093	-0.0397504	-0.408138	-0.370766	-0.231221	-0.55291	-0.757856	-0.406861	0.455822	-0.551604	0.636272	-0.480304	0.0541659	-0.179816	0.0509926	-0.865347	0.289804	-0.396481	-0.114485	-0.14028	0.428242	-0.946947	-0.134154	0.29171	-0.196216	0.397092	0.464166	-0.410064	0.337647	0.306331	-0.280284	0.171546	0.616988
-4.40231	-0.0276544	-1.4117	-0.331918	-0.499443	-0.214434	-0.224931	-0.83719	-0.66975	-0.550287	-0.376008	-0.361875	-1.1207	-0.110926	-0.59976	-0.422724	-0.561076	-0.425232	-0.0400103	-0.408673	-0.370458	-0.231509	-0.552904	-0.758847	-0.407808	0.456813	-0.551923	0.63663	-0.480804	0.0546655	-0.178851	0.0519422	-0.865251	0.290368	-0.396152	-0.115125	-0.140263	0.42921	-0.947491	-0.134022	0.292129	-0.195925	0.397772	0.46397	-0.409984	0.337755	0.303931	-0.279039	0.17163	0.616747
-4.40133	-0.0265703	-1.41221	-0.330623	-0.498589	-0.214576	-0.227049	-0.83657	-0.671023	-0.549993	-0.375666	-0.363064	-1.12092	-0.112139	-0.598889	-0.421512	-0.562045	-0.425368	-0.0402758	-0.409204	-0.370157	-0.231793	-0.552889	-0.759832	-0.408758	0.457817	-0.552244	0.63698	-0.481305	0.0551589	-0.177873	0.0528858	-0.865152	0.290932	-0.395818	-0.115758	-0.140248	0.430183	-0.948031	-0.133903	0.292549	-0.195643	0.398455	0.463781	-0.409892	0.337868	0.301527	-0.277765	0.171718	0.616507
-4.40035	-0.0254786	-1.41272	-0.329328	-0.497743	-0.214721	-0.22919	-0.835951	-0.672295	-0.549711	-0.375319	-0.364253	-1.12113	-0.11335	-0.598013	-0.420303	-0.56301	-0.4255	-0.0405468	-0.409733	-0.369863	-0.232074	-0.552867	-0.76081	-0.409711	0.458835	-0.552567	0.637322	-0.481808	0.0556463	-0.176881	0.0538237	-0.865051	0.291495	-0.395481	-0.116383	-0.140234	0.431162	-0.948569	-0.133799	0.292971	-0.195371	0.39914	0.463598	-0.409789	0.337988	0.299119	-0.276464	0.171811	0.616268
-4.39936	-0.0243793	-1.41322	-0.328032	-0.496907	-0.214867	-0.231352	-0.835332	-0.673566	-0.549442	-0.374966	-0.365441	-1.12134	-0.114558	-0.59713	-0.419097	-0.563972	-0.42563	-0.0408232	-0.410258	-0.369575	-0.232351	-0.552837	-0.761781	-0.410667	0.459865	-0.552892	0.637656	-0.482311	0.0561277	-0.175877	0.0547559	-0.864947	0.292057	-0.395139	-0.117001	-0.14022	0.432146	-0.949105	-0.133709	0.293393	-0.195109	0.399828	0.463421	-0.409673	0.338115	0.296706	-0.275134	0.171909	0.616031
-4.39838	-0.0232726	-1.41372	-0.326735	-0.49608	-0.215015	-0.233535	-0.834715	-0.674836	-0.549185	-0.374609	-0.366627	-1.12155	-0.115763	-0.596242	-0.417893	-0.564931	-0.425756	-0.0411051	-0.41078	-0.369293	-0.232624	-0.552799	-0.762745	-0.411626	0.460909	-0.55322	0.637982	-0.482814	0.056603	-0.17486	0.0556827	-0.86484	0.292619	-0.394794	-0.117612	-0.140208	0.433135	-0.949637	-0.133632	0.293816	-0.194857	0.400518	0.46325	-0.409546	0.338248	0.294289	-0.273776	0.172011	0.615794
-4.3974	-0.0221587	-1.41422	-0.325438	-0.495263	-0.215164	-0.235739	-0.834098	-0.676105	-0.548942	-0.374246	-0.367813	-1.12175	-0.116966	-0.595349	-0.416693	-0.565888	-0.425878	-0.0413924	-0.411298	-0.369018	-0.232893	-0.552752	-0.763702	-0.412587	0.461965	-0.553551	0.638301	-0.483318	0.0570722	-0.173831	0.056604	-0.86473	0.293179	-0.394444	-0.118216	-0.140196	0.434129	-0.950167	-0.13357	0.294241	-0.194616	0.40121	0.463085	-0.409407	0.338386	0.291868	-0.27239	0.172117	0.615558
-4.39641	-0.0210377	-1.41472	-0.324141	-0.494454	-0.215315	-0.237965	-0.833481	-0.677372	-0.548711	-0.373878	-0.368997	-1.12194	-0.118166	-0.594449	-0.415495	-0.566841	-0.425998	-0.041685	-0.411812	-0.368749	-0.233159	-0.552698	-0.764652	-0.413551	0.463035	-0.553884	0.638611	-0.483823	0.0575355	-0.172788	0.0575202	-0.864618	0.293739	-0.39409	-0.118811	-0.140186	0.435129	-0.950695	-0.133521	0.294666	-0.194385	0.401905	0.462927	-0.409256	0.338532	0.289443	-0.270976	0.172228	0.615323
-4.39543	-0.0199096	-1.41522	-0.322843	-0.493655	-0.215468	-0.240211	-0.832866	-0.678638	-0.548493	-0.373505	-0.37018	-1.12213	-0.119363	-0.593545	-0.414301	-0.567791	-0.426114	-0.041983	-0.412324	-0.368487	-0.233421	-0.552636	-0.765595	-0.414517	0.464119	-0.554219	0.638914	-0.484328	0.0579927	-0.171733	0.0584312	-0.864502	0.294297	-0.393731	-0.1194	-0.140177	0.436134	-0.951219	-0.133487	0.295091	-0.194164	0.402602	0.462775	-0.409093	0.338683	0.287014	-0.269535	0.172342	0.615089
-4.39445	-0.0187747	-1.41572	-0.321545	-0.492865	-0.215622	-0.242477	-0.832251	-0.679903	-0.548287	-0.373126	-0.371361	-1.12231	-0.120558	-0.592635	-0.41311	-0.568738	-0.426227	-0.0422862	-0.412831	-0.368231	-0.233679	-0.552566	-0.766531	-0.415485	0.465216	-0.554557	0.639209	-0.484832	0.0584439	-0.170666	0.0593374	-0.864383	0.294854	-0.393368	-0.11998	-0.140169	0.437144	-0.951741	-0.133466	0.295517	-0.193953	0.403301	0.462629	-0.408919	0.33884	0.284582	-0.268065	0.172461	0.614855
-4.39346	-0.0176331	-1.41621	-0.320245	-0.492084	-0.215778	-0.244763	-0.831638	-0.681166	-0.548094	-0.372742	-0.372541	-1.12249	-0.121749	-0.59172	-0.411921	-0.569681	-0.426337	-0.0425947	-0.413335	-0.367981	-0.233933	-0.552488	-0.767459	-0.416456	0.466326	-0.554897	0.639496	-0.485337	0.0588892	-0.169586	0.0602387	-0.86426	0.295409	-0.393	-0.120553	-0.140162	0.438159	-0.95226	-0.133459	0.295944	-0.193753	0.404002	0.46249	-0.408732	0.339004	0.282146	-0.266568	0.172584	0.614622
-4.39248	-0.0164849	-1.4167	-0.318946	-0.491313	-0.215935	-0.247069	-0.831025	-0.682428	-0.547914	-0.372353	-0.37372	-1.12266	-0.122938	-0.5908	-0.410737	-0.570622	-0.426443	-0.0429083	-0.413835	-0.367738	-0.234184	-0.552403	-0.768379	-0.417428	0.46745	-0.55524	0.639776	-0.485842	0.0593285	-0.168493	0.0611353	-0.864135	0.295962	-0.392628	-0.121118	-0.140156	0.43918	-0.952777	-0.133467	0.296371	-0.193564	0.404705	0.462357	-0.408533	0.339174	0.279707	-0.265043	0.172711	0.614389
-4.3915	-0.0153303	-1.41719	-0.317646	-0.49055	-0.216094	-0.249395	-0.830413	-0.683688	-0.547746	-0.371958	-0.374897	-1.12282	-0.124124	-0.589874	-0.409555	-0.571559	-0.426546	-0.0432271	-0.414331	-0.3675	-0.234431	-0.552309	-0.769291	-0.418402	0.468587	-0.555585	0.640048	-0.486346	0.0597618	-0.167388	0.0620274	-0.864005	0.296513	-0.392251	-0.121675	-0.140152	0.440205	-0.953291	-0.133489	0.296798	-0.193385	0.40541	0.46223	-0.408322	0.339349	0.277264	-0.26349	0.172841	0.614157
-4.39052	-0.0141693	-1.41767	-0.316345	-0.489798	-0.216253	-0.25174	-0.829802	-0.684946	-0.547591	-0.371558	-0.376072	-1.12298	-0.125307	-0.588943	-0.408377	-0.572493	-0.426645	-0.043551	-0.414823	-0.367269	-0.234673	-0.552207	-0.770196	-0.419378	0.469738	-0.555932	0.640312	-0.48685	0.0601893	-0.166271	0.0629151	-0.863872	0.297062	-0.391869	-0.122224	-0.140149	0.441236	-0.953803	-0.133524	0.297225	-0.193216	0.406116	0.462109	-0.408099	0.339531	0.274819	-0.26191	0.172976	0.613925
-4.38953	-0.0130022	-1.41816	-0.315044	-0.489054	-0.216414	-0.254104	-0.829192	-0.686203	-0.547448	-0.371153	-0.377246	-1.12313	-0.126487	-0.588008	-0.407202	-0.573424	-0.426742	-0.04388	-0.415311	-0.367043	-0.234912	-0.552097	-0.771093	-0.420356	0.470902	-0.556283	0.64057	-0.487353	0.0606108	-0.165142	0.0637985	-0.863735	0.297609	-0.391483	-0.122765	-0.140147	0.442272	-0.954312	-0.133574	0.297652	-0.193059	0.406824	0.461995	-0.407864	0.339718	0.272371	-0.260302	0.173114	0.613694
-4.38855	-0.0118291	-1.41864	-0.313742	-0.48832	-0.216575	-0.256487	-0.828583	-0.687458	-0.547318	-0.370742	-0.378418	-1.12328	-0.127664	-0.587067	-0.406031	-0.574351	-0.426835	-0.044214	-0.415795	-0.366824	-0.235147	-0.55198	-0.771981	-0.421334	0.47208	-0.556635	0.64082	-0.487855	0.0610265	-0.164001	0.0646779	-0.863595	0.298154	-0.391091	-0.123298	-0.140146	0.443313	-0.954818	-0.133638	0.298079	-0.192912	0.407534	0.461887	-0.407617	0.339912	0.26992	-0.258668	0.173256	0.613463
-4.38757	-0.0106501	-1.41912	-0.312439	-0.487595	-0.216738	-0.258889	-0.827975	-0.688712	-0.5472	-0.370326	-0.379589	-1.12342	-0.128839	-0.586122	-0.404864	-0.575275	-0.426924	-0.0445529	-0.416275	-0.366611	-0.235379	-0.551855	-0.772862	-0.422314	0.473272	-0.556991	0.641062	-0.488357	0.0614362	-0.162847	0.0655533	-0.86345	0.298695	-0.390695	-0.123823	-0.140146	0.444359	-0.955322	-0.133716	0.298506	-0.192776	0.408245	0.461785	-0.407358	0.340111	0.267467	-0.257005	0.173401	0.613232
-4.38658	-0.00946537	-1.4196	-0.311136	-0.48688	-0.216902	-0.261308	-0.827368	-0.689963	-0.547095	-0.369904	-0.380757	-1.12355	-0.13001	-0.585172	-0.4037	-0.576195	-0.42701	-0.0448968	-0.416751	-0.366403	-0.235606	-0.551721	-0.773734	-0.423296	0.474477	-0.557349	0.641298	-0.488857	0.0618402	-0.161682	0.0664249	-0.863301	0.299234	-0.390293	-0.124339	-0.140148	0.445411	-0.955823	-0.133808	0.298933	-0.19265	0.408958	0.461689	-0.407087	0.340317	0.265012	-0.255316	0.17355	0.613001
-4.3856	-0.00827505	-1.42007	-0.309833	-0.486174	-0.217066	-0.263746	-0.826762	-0.691213	-0.547001	-0.369477	-0.381924	-1.12368	-0.131177	-0.584217	-0.40254	-0.577112	-0.427093	-0.0452456	-0.417223	-0.366202	-0.235829	-0.55158	-0.774597	-0.424278	0.475697	-0.557709	0.641527	-0.489357	0.0622383	-0.160505	0.0672927	-0.863148	0.29977	-0.389887	-0.124847	-0.140151	0.446467	-0.956321	-0.133914	0.299359	-0.192536	0.409672	0.4616	-0.406803	0.340528	0.262554	-0.2536	0.173702	0.61277
-4.38462	-0.0070793	-1.42055	-0.308528	-0.485477	-0.217232	-0.266201	-0.826157	-0.692461	-0.54692	-0.369045	-0.383089	-1.1238	-0.132342	-0.583258	-0.401383	-0.578025	-0.427173	-0.0455992	-0.41769	-0.366006	-0.236048	-0.551431	-0.775452	-0.425261	0.476929	-0.558072	0.641748	-0.489855	0.0626306	-0.159316	0.0681571	-0.862991	0.300303	-0.389475	-0.125347	-0.140155	0.447528	-0.956817	-0.134034	0.299785	-0.192432	0.410387	0.461517	-0.406507	0.340745	0.260094	-0.251857	0.173857	0.612539
-4.38363	-0.00587825	-1.42102	-0.307223	-0.48479	-0.217398	-0.268673	-0.825554	-0.693706	-0.546852	-0.368607	-0.384252	-1.12391	-0.133504	-0.582294	-0.400231	-0.578935	-0.427249	-0.0459575	-0.418153	-0.365816	-0.236264	-0.551275	-0.776298	-0.426245	0.478176	-0.558438	0.641962	-0.490351	0.0630171	-0.158115	0.0690181	-0.862829	0.300832	-0.389058	-0.125838	-0.140161	0.448595	-0.957311	-0.134169	0.30021	-0.192339	0.411103	0.46144	-0.406199	0.340967	0.257632	-0.250087	0.174016	0.612308
-4.38265	-0.00467207	-1.42148	-0.305918	-0.484113	-0.217564	-0.271163	-0.824952	-0.69495	-0.546795	-0.368164	-0.385413	-1.12401	-0.134662	-0.581326	-0.399082	-0.579841	-0.427322	-0.0463206	-0.418612	-0.365632	-0.236475	-0.55111	-0.777135	-0.427229	0.479436	-0.558806	0.64217	-0.490846	0.0633979	-0.156903	0.0698758	-0.862663	0.301358	-0.388635	-0.126321	-0.140168	0.449666	-0.957801	-0.134317	0.300634	-0.192258	0.41182	0.46137	-0.405879	0.341195	0.255168	-0.248291	0.174177	0.612077
-4.38167	-0.00346089	-1.42195	-0.304611	-0.483444	-0.217731	-0.273669	-0.82435	-0.696192	-0.54675	-0.367715	-0.386572	-1.12411	-0.135817	-0.580353	-0.397937	-0.580743	-0.427392	-0.0466884	-0.419066	-0.365453	-0.236682	-0.550938	-0.777964	-0.428214	0.48071	-0.559177	0.642371	-0.49134	0.063773	-0.155679	0.0707304	-0.862492	0.301881	-0.388208	-0.126795	-0.140176	0.450743	-0.95829	-0.13448	0.301058	-0.192187	0.412538	0.461306	-0.405547	0.341429	0.252703	-0.246468	0.174342	0.611846
-4.38068	-0.00224486	-1.42241	-0.303305	-0.482786	-0.217899	-0.276192	-0.823751	-0.697431	-0.546718	-0.36726	-0.387729	-1.1242	-0.136969	-0.579376	-0.396797	-0.581642	-0.427458	-0.0470608	-0.419516	-0.36528	-0.236885	-0.550758	-0.778783	-0.429199	0.481998	-0.559551	0.642565	-0.491831	0.0641423	-0.154444	0.0715821	-0.862316	0.302399	-0.387774	-0.12726	-0.140186	0.451824	-0.958776	-0.134657	0.301481	-0.192127	0.413257	0.461248	-0.405202	0.341669	0.250237	-0.244618	0.174509	0.611615
-4.3797	-0.00102415	-1.42287	-0.301997	-0.482136	-0.218067	-0.278731	-0.823152	-0.698668	-0.546697	-0.3668	-0.388884	-1.12428	-0.138118	-0.578395	-0.39566	-0.582537	-0.427521	-0.0474377	-0.419961	-0.365113	-0.237085	-0.55057	-0.779593	-0.430184	0.4833	-0.559927	0.642752	-0.492321	0.064506	-0.153198	0.072431	-0.862135	0.302914	-0.387336	-0.127716	-0.140197	0.45291	-0.959259	-0.134847	0.301903	-0.192079	0.413977	0.461196	-0.404845	0.341914	0.247769	-0.242742	0.17468	0.611383
-4.37872	0.000201109	-1.42333	-0.300689	-0.481496	-0.218236	-0.281286	-0.822555	-0.699903	-0.546689	-0.366335	-0.390037	-1.12436	-0.139263	-0.57741	-0.394528	-0.583429	-0.427581	-0.0478192	-0.420402	-0.364951	-0.23728	-0.550374	-0.780394	-0.431169	0.484615	-0.560306	0.642932	-0.492809	0.0648639	-0.151941	0.0732772	-0.861949	0.303424	-0.386891	-0.128164	-0.14021	0.454002	-0.95974	-0.135052	0.302324	-0.192041	0.414697	0.461151	-0.404476	0.342164	0.2453	-0.24084	0.174853	0.611151
-4.37774	0.00143075	-1.42379	-0.29938	-0.480866	-0.218405	-0.283857	-0.821959	-0.701136	-0.546692	-0.365864	-0.391188	-1.12443	-0.140405	-0.57642	-0.393399	-0.584317	-0.427637	-0.0482051	-0.420838	-0.364795	-0.237471	-0.550171	-0.781185	-0.432155	0.485945	-0.560688	0.643107	-0.493294	0.0652163	-0.150672	0.0741209	-0.861758	0.30393	-0.386441	-0.128603	-0.140223	0.455098	-0.960218	-0.135271	0.302743	-0.192015	0.415418	0.461112	-0.404094	0.34242	0.24283	-0.238912	0.175029	0.610918
-4.37675	0.00266463	-1.42424	-0.29807	-0.480245	-0.218574	-0.286443	-0.821364	-0.702366	-0.546707	-0.365387	-0.392337	-1.12448	-0.141544	-0.575427	-0.392275	-0.585201	-0.42769	-0.0485955	-0.421269	-0.364644	-0.237658	-0.549961	-0.781967	-0.43314	0.487288	-0.561072	0.643274	-0.493777	0.0655631	-0.149393	0.0749622	-0.861562	0.304431	-0.385986	-0.129033	-0.140239	0.456199	-0.960693	-0.135505	0.303162	-0.192	0.41614	0.461079	-0.4037	0.342682	0.240359	-0.236958	0.175208	0.610685
-4.37577	0.00390259	-1.42469	-0.29676	-0.479633	-0.218743	-0.289045	-0.820771	-0.703594	-0.546734	-0.364905	-0.393483	-1.12454	-0.142679	-0.574429	-0.391156	-0.586081	-0.42774	-0.0489902	-0.421695	-0.364499	-0.237841	-0.549742	-0.78274	-0.434124	0.488645	-0.561459	0.643435	-0.494257	0.0659042	-0.148102	0.0758013	-0.86136	0.304928	-0.385524	-0.129454	-0.140255	0.457304	-0.961167	-0.135752	0.30358	-0.191996	0.416861	0.461052	-0.403294	0.342948	0.237888	-0.234978	0.175389	0.610451
-4.37479	0.00514447	-1.42514	-0.295448	-0.479031	-0.218913	-0.291661	-0.82018	-0.70482	-0.546772	-0.364418	-0.394628	-1.12458	-0.143811	-0.573428	-0.39004	-0.586957	-0.427787	-0.0493892	-0.422117	-0.364358	-0.23802	-0.549516	-0.783502	-0.435109	0.490016	-0.561849	0.64359	-0.494735	0.0662398	-0.146801	0.0766383	-0.861153	0.30542	-0.385057	-0.129866	-0.140273	0.458415	-0.961637	-0.136013	0.303996	-0.192003	0.417584	0.461031	-0.402875	0.343221	0.235416	-0.232973	0.175572	0.610216
-4.3738	0.00639013	-1.42558	-0.294137	-0.478439	-0.219082	-0.294291	-0.81959	-0.706043	-0.546822	-0.363924	-0.39577	-1.12461	-0.144939	-0.572423	-0.388929	-0.58783	-0.42783	-0.0497925	-0.422534	-0.364223	-0.238195	-0.549283	-0.784255	-0.436092	0.4914	-0.562242	0.643739	-0.49521	0.0665699	-0.145489	0.0774734	-0.86094	0.305907	-0.384584	-0.130269	-0.140293	0.45953	-0.962106	-0.136288	0.30441	-0.192021	0.418306	0.461016	-0.402444	0.343498	0.232944	-0.230942	0.175758	0.609981
-4.37282	0.0076394	-1.42602	-0.292824	-0.477856	-0.219252	-0.296936	-0.819001	-0.707263	-0.546884	-0.363426	-0.396909	-1.12464	-0.146064	-0.571414	-0.387823	-0.588699	-0.42787	-0.0501999	-0.422946	-0.364094	-0.238365	-0.549042	-0.784998	-0.437075	0.492799	-0.562637	0.643881	-0.495682	0.0668945	-0.144167	0.0783067	-0.860721	0.306388	-0.384105	-0.130663	-0.140314	0.46065	-0.962571	-0.136578	0.304823	-0.192051	0.419029	0.461008	-0.402001	0.343781	0.230472	-0.228885	0.175946	0.609745
-4.37184	0.00889212	-1.42646	-0.291511	-0.477282	-0.219421	-0.299595	-0.818414	-0.708481	-0.546957	-0.362921	-0.398047	-1.12466	-0.147186	-0.570402	-0.386721	-0.589563	-0.427907	-0.0506115	-0.423353	-0.363969	-0.238532	-0.548793	-0.785731	-0.438057	0.494211	-0.563036	0.644018	-0.496151	0.0672136	-0.142834	0.0791384	-0.860497	0.306865	-0.38362	-0.131047	-0.140336	0.461775	-0.963035	-0.136881	0.305235	-0.192092	0.419751	0.461005	-0.401546	0.344069	0.228	-0.226803	0.176136	0.609508
-4.37085	0.0101481	-1.4269	-0.290196	-0.476718	-0.21959	-0.302267	-0.817828	-0.709696	-0.547041	-0.362411	-0.399182	-1.12467	-0.148304	-0.569386	-0.385624	-0.590424	-0.427941	-0.0510271	-0.423755	-0.36385	-0.238694	-0.548537	-0.786454	-0.439038	0.495637	-0.563437	0.644148	-0.496618	0.0675273	-0.141491	0.0799686	-0.860266	0.307335	-0.383129	-0.131423	-0.14036	0.462905	-0.963495	-0.137198	0.305645	-0.192144	0.420474	0.461009	-0.401078	0.344362	0.225528	-0.224697	0.176329	0.60927
-4.36987	0.0114073	-1.42733	-0.288882	-0.476164	-0.219759	-0.304953	-0.817245	-0.710909	-0.547137	-0.361896	-0.400315	-1.12467	-0.149419	-0.568367	-0.384531	-0.591281	-0.427971	-0.0514467	-0.424152	-0.363735	-0.238853	-0.548274	-0.787166	-0.440017	0.497077	-0.563841	0.644272	-0.49708	0.0678356	-0.140138	0.0807975	-0.860029	0.3078	-0.382632	-0.131789	-0.140385	0.464039	-0.963953	-0.13753	0.306053	-0.192207	0.421196	0.461019	-0.400597	0.34466	0.223057	-0.222565	0.176523	0.609031
-4.36889	0.0126695	-1.42777	-0.287566	-0.475618	-0.219928	-0.307652	-0.816662	-0.712119	-0.547245	-0.361375	-0.401445	-1.12466	-0.15053	-0.567344	-0.383443	-0.592134	-0.427999	-0.0518703	-0.424544	-0.363626	-0.239007	-0.548003	-0.787868	-0.440996	0.49853	-0.564247	0.64439	-0.49754	0.0681385	-0.138775	0.0816251	-0.859786	0.308259	-0.382129	-0.132146	-0.140412	0.465177	-0.964409	-0.137875	0.30646	-0.192282	0.421918	0.461034	-0.400105	0.344963	0.220586	-0.220408	0.17672	0.608791
-4.36791	0.0139344	-1.4282	-0.28625	-0.475083	-0.220096	-0.310363	-0.816082	-0.713326	-0.547363	-0.360848	-0.402573	-1.12464	-0.151637	-0.566318	-0.382359	-0.592984	-0.428023	-0.0522977	-0.424931	-0.363522	-0.239157	-0.547725	-0.78856	-0.441973	0.499997	-0.564657	0.644503	-0.497996	0.068436	-0.137402	0.0824517	-0.859537	0.308712	-0.381619	-0.132493	-0.14044	0.466321	-0.964863	-0.138234	0.306864	-0.192368	0.42264	0.461056	-0.3996	0.345272	0.218116	-0.218227	0.176918	0.60855
-4.36692	0.0152021	-1.42862	-0.284932	-0.474557	-0.220264	-0.313087	-0.815503	-0.71453	-0.547493	-0.360316	-0.403698	-1.12461	-0.152741	-0.565288	-0.381281	-0.593829	-0.428044	-0.052729	-0.425312	-0.363422	-0.239303	-0.54744	-0.789241	-0.442948	0.501478	-0.565069	0.64461	-0.498448	0.0687282	-0.136019	0.0832775	-0.859281	0.309159	-0.381104	-0.132831	-0.14047	0.467468	-0.965313	-0.138607	0.307267	-0.192466	0.423361	0.461083	-0.399082	0.345585	0.215647	-0.216022	0.177118	0.608308
-4.36594	0.0164722	-1.42905	-0.283614	-0.47404	-0.220432	-0.315823	-0.814926	-0.715731	-0.547633	-0.359778	-0.404821	-1.12457	-0.153841	-0.564256	-0.380207	-0.59467	-0.428062	-0.0531641	-0.425689	-0.363327	-0.239445	-0.547148	-0.789912	-0.443921	0.502973	-0.565485	0.644711	-0.498896	0.0690151	-0.134627	0.0841024	-0.859019	0.3096	-0.380582	-0.133159	-0.140501	0.468621	-0.965762	-0.138994	0.307668	-0.192575	0.424082	0.461117	-0.398552	0.345903	0.213179	-0.213792	0.177319	0.608064
-4.36496	0.0177447	-1.42947	-0.282296	-0.473533	-0.220599	-0.318571	-0.814351	-0.71693	-0.547785	-0.359234	-0.405942	-1.12453	-0.154938	-0.56322	-0.379138	-0.595507	-0.428077	-0.0536028	-0.42606	-0.363238	-0.239583	-0.546848	-0.790572	-0.444893	0.504481	-0.565903	0.644807	-0.499341	0.0692968	-0.133225	0.0849268	-0.858749	0.310033	-0.380054	-0.133478	-0.140533	0.469777	-0.966208	-0.139395	0.308067	-0.192695	0.424802	0.461156	-0.39801	0.346226	0.210712	-0.211538	0.177523	0.607819
-4.36397	0.0190193	-1.42988	-0.280976	-0.473035	-0.220765	-0.321331	-0.813778	-0.718125	-0.547947	-0.358685	-0.40706	-1.12447	-0.156031	-0.562182	-0.378074	-0.59634	-0.428089	-0.0540452	-0.426426	-0.363153	-0.239716	-0.546541	-0.791221	-0.445863	0.506003	-0.566324	0.644897	-0.499781	0.0695732	-0.131813	0.0857507	-0.858473	0.31046	-0.379519	-0.133788	-0.140567	0.470939	-0.966651	-0.139809	0.308463	-0.192826	0.425522	0.461201	-0.397456	0.346554	0.208247	-0.20926	0.177727	0.607573
-4.36299	0.020296	-1.4303	-0.279656	-0.472546	-0.220931	-0.324101	-0.813206	-0.719317	-0.548121	-0.35813	-0.408176	-1.12441	-0.15712	-0.56114	-0.377015	-0.597169	-0.428097	-0.0544912	-0.426787	-0.363072	-0.239846	-0.546228	-0.79186	-0.446831	0.507538	-0.566748	0.644981	-0.500218	0.0698444	-0.130393	0.0865743	-0.85819	0.310881	-0.378978	-0.134087	-0.140602	0.472104	-0.967092	-0.140238	0.308858	-0.192969	0.426241	0.461252	-0.396889	0.346887	0.205783	-0.206958	0.177933	0.607325
-4.36201	0.0215746	-1.43071	-0.278334	-0.472068	-0.221096	-0.326883	-0.812637	-0.720507	-0.548305	-0.35757	-0.409289	-1.12433	-0.158206	-0.560096	-0.375961	-0.597995	-0.428103	-0.0549406	-0.427142	-0.362997	-0.239971	-0.545907	-0.792487	-0.447796	0.509087	-0.567175	0.64506	-0.50065	0.0701105	-0.128963	0.0873978	-0.857899	0.311294	-0.378431	-0.134378	-0.140639	0.473274	-0.96753	-0.14068	0.30925	-0.193123	0.426959	0.461309	-0.39631	0.347225	0.203321	-0.204632	0.178141	0.607076
-4.36102	0.0228548	-1.43112	-0.277012	-0.471598	-0.22126	-0.329675	-0.812069	-0.721693	-0.5485	-0.357003	-0.410399	-1.12424	-0.159288	-0.559048	-0.374912	-0.598816	-0.428105	-0.0553935	-0.427492	-0.362926	-0.240092	-0.545579	-0.793103	-0.448759	0.51065	-0.567604	0.645134	-0.501078	0.0703714	-0.127524	0.0882212	-0.857602	0.3117	-0.377877	-0.134658	-0.140677	0.474448	-0.967966	-0.141135	0.309641	-0.193289	0.427675	0.461371	-0.395718	0.347567	0.200861	-0.202283	0.17835	0.606825
-4.36004	0.0241366	-1.43153	-0.275689	-0.471138	-0.221423	-0.332478	-0.811504	-0.722876	-0.548705	-0.356432	-0.411507	-1.12415	-0.160367	-0.557998	-0.373868	-0.599633	-0.428105	-0.0558498	-0.427836	-0.362859	-0.240209	-0.545244	-0.793708	-0.449719	0.512226	-0.568037	0.645203	-0.501501	0.0706272	-0.126077	0.0890447	-0.857297	0.312098	-0.377317	-0.134929	-0.140717	0.475627	-0.9684	-0.141605	0.310028	-0.193465	0.428391	0.461439	-0.395114	0.347914	0.198403	-0.199911	0.17856	0.606573
-4.35906	0.0254197	-1.43193	-0.274366	-0.470687	-0.221586	-0.335291	-0.81094	-0.724056	-0.548921	-0.355855	-0.412612	-1.12404	-0.161441	-0.556946	-0.37283	-0.600445	-0.428102	-0.0563093	-0.428176	-0.362797	-0.240322	-0.544903	-0.794302	-0.450677	0.513815	-0.568473	0.645267	-0.50192	0.070878	-0.12462	0.0898686	-0.856984	0.312489	-0.37675	-0.13519	-0.140758	0.47681	-0.968831	-0.142088	0.310414	-0.193653	0.429106	0.461513	-0.394498	0.348265	0.195947	-0.197515	0.178771	0.606319
-4.35807	0.026704	-1.43233	-0.273041	-0.470246	-0.221748	-0.338113	-0.810379	-0.725233	-0.549148	-0.355272	-0.413715	-1.12392	-0.162512	-0.55589	-0.371796	-0.601254	-0.428095	-0.0567722	-0.428509	-0.362739	-0.240431	-0.544554	-0.794885	-0.451632	0.515418	-0.568911	0.645325	-0.502334	0.0711237	-0.123155	0.0906928	-0.856664	0.312872	-0.376176	-0.135441	-0.1408	0.477997	-0.969259	-0.142584	0.310797	-0.193853	0.42982	0.461592	-0.39387	0.348621	0.193494	-0.195097	0.178983	0.606063
-4.35709	0.0279894	-1.43273	-0.271715	-0.469814	-0.221908	-0.340945	-0.80982	-0.726406	-0.549384	-0.354683	-0.414816	-1.1238	-0.16358	-0.554832	-0.370768	-0.602059	-0.428086	-0.0572381	-0.428837	-0.362686	-0.240535	-0.544199	-0.795456	-0.452584	0.517034	-0.569353	0.645378	-0.502743	0.0713645	-0.121682	0.0915177	-0.856336	0.313247	-0.375596	-0.135683	-0.140844	0.479188	-0.969685	-0.143095	0.311178	-0.194063	0.430532	0.461677	-0.393229	0.348982	0.191043	-0.192656	0.179196	0.605805
-4.35611	0.0292757	-1.43313	-0.270389	-0.469392	-0.222068	-0.343786	-0.809263	-0.727577	-0.549632	-0.354089	-0.415913	-1.12366	-0.164643	-0.553772	-0.369745	-0.60286	-0.428074	-0.0577072	-0.42916	-0.362637	-0.240636	-0.543837	-0.796016	-0.453533	0.518663	-0.569798	0.645427	-0.503147	0.0716003	-0.1202	0.0923432	-0.856	0.313614	-0.375009	-0.135915	-0.140889	0.480383	-0.970109	-0.143618	0.311556	-0.194285	0.431243	0.461767	-0.392576	0.349346	0.188595	-0.190192	0.17941	0.605546
-4.35513	0.0305626	-1.43352	-0.269062	-0.468979	-0.222226	-0.346636	-0.808708	-0.728743	-0.549889	-0.353489	-0.417008	-1.12351	-0.165703	-0.55271	-0.368727	-0.603656	-0.428059	-0.0581794	-0.429477	-0.362593	-0.240732	-0.543469	-0.796564	-0.454479	0.520306	-0.570245	0.645471	-0.503546	0.0718311	-0.118711	0.0931696	-0.855656	0.313973	-0.374416	-0.136136	-0.140936	0.481582	-0.97053	-0.144155	0.311932	-0.194519	0.431952	0.461862	-0.39191	0.349716	0.186151	-0.187706	0.179624	0.605285
-4.35414	0.0318501	-1.43391	-0.267734	-0.468575	-0.222383	-0.349495	-0.808155	-0.729907	-0.550156	-0.352884	-0.418101	-1.12335	-0.166759	-0.551645	-0.367715	-0.604448	-0.428041	-0.0586544	-0.429788	-0.362552	-0.240824	-0.543094	-0.797101	-0.455422	0.521962	-0.570696	0.64551	-0.50394	0.0720571	-0.117213	0.093997	-0.855304	0.314323	-0.373816	-0.136348	-0.140984	0.482786	-0.970948	-0.144706	0.312305	-0.194763	0.43266	0.461963	-0.391232	0.350089	0.183709	-0.185198	0.17984	0.605021
-4.35316	0.033138	-1.4343	-0.266405	-0.46818	-0.222539	-0.352361	-0.807604	-0.731067	-0.550434	-0.352273	-0.419191	-1.12318	-0.167812	-0.550578	-0.366708	-0.605237	-0.428021	-0.0591324	-0.430094	-0.362516	-0.240913	-0.542712	-0.797626	-0.456361	0.523631	-0.571149	0.645544	-0.504329	0.0722782	-0.115708	0.0948255	-0.854944	0.314665	-0.373209	-0.136551	-0.141033	0.483993	-0.971364	-0.14527	0.312676	-0.195019	0.433365	0.46207	-0.390543	0.350467	0.181271	-0.182668	0.180055	0.604756
-4.35218	0.0344261	-1.43469	-0.265075	-0.467795	-0.222694	-0.355236	-0.807056	-0.732224	-0.550721	-0.351657	-0.420278	-1.123	-0.16886	-0.549508	-0.365707	-0.606021	-0.427998	-0.0596132	-0.430394	-0.362484	-0.240997	-0.542324	-0.798139	-0.457296	0.525313	-0.571606	0.645573	-0.504712	0.0724944	-0.114194	0.0956553	-0.854575	0.314999	-0.372595	-0.136743	-0.141084	0.485204	-0.971778	-0.145847	0.313043	-0.195286	0.43407	0.462181	-0.38984	0.35085	0.178836	-0.180116	0.180272	0.604488
-4.35119	0.0357143	-1.43507	-0.263744	-0.467419	-0.222847	-0.358118	-0.80651	-0.733377	-0.551019	-0.351034	-0.421363	-1.1228	-0.169905	-0.548437	-0.364711	-0.606801	-0.427971	-0.0600968	-0.430688	-0.362456	-0.241077	-0.54193	-0.79864	-0.458228	0.527008	-0.572066	0.645598	-0.50509	0.0727059	-0.112674	0.0964866	-0.854197	0.315323	-0.371974	-0.136925	-0.141136	0.486419	-0.972189	-0.146437	0.313409	-0.195564	0.434772	0.462298	-0.389126	0.351236	0.176405	-0.177542	0.180489	0.604219
-4.35021	0.0370024	-1.43545	-0.262413	-0.467053	-0.222999	-0.361008	-0.805967	-0.734526	-0.551326	-0.350407	-0.422445	-1.1226	-0.170946	-0.547364	-0.36372	-0.607577	-0.427943	-0.060583	-0.430977	-0.362432	-0.241153	-0.541529	-0.799129	-0.459156	0.528715	-0.572528	0.645619	-0.505462	0.0729127	-0.111146	0.0973194	-0.853811	0.315638	-0.371347	-0.137097	-0.141189	0.487638	-0.972597	-0.147041	0.313771	-0.195853	0.435472	0.46242	-0.388399	0.351626	0.173978	-0.174947	0.180706	0.603947
-4.34923	0.0382901	-1.43582	-0.26108	-0.466696	-0.223149	-0.363905	-0.805426	-0.735672	-0.551643	-0.349774	-0.423524	-1.12238	-0.171984	-0.546288	-0.362735	-0.608348	-0.427911	-0.0610718	-0.43126	-0.362413	-0.241224	-0.541122	-0.799607	-0.46008	0.530436	-0.572994	0.645635	-0.505828	0.0731147	-0.10961	0.0981539	-0.853417	0.315944	-0.370713	-0.137259	-0.141244	0.488861	-0.973003	-0.147658	0.314131	-0.196154	0.436171	0.462547	-0.38766	0.352021	0.171555	-0.172331	0.180924	0.603673
-4.34824	0.0395775	-1.4362	-0.259747	-0.466347	-0.223298	-0.366808	-0.804887	-0.736814	-0.551969	-0.349135	-0.424601	-1.12215	-0.173017	-0.545211	-0.361756	-0.609116	-0.427877	-0.0615632	-0.431537	-0.362397	-0.241292	-0.540709	-0.800072	-0.461	0.53217	-0.573463	0.645647	-0.506188	0.073312	-0.108068	0.0989903	-0.853013	0.316241	-0.370071	-0.137411	-0.1413	0.490087	-0.973407	-0.148288	0.314488	-0.196465	0.436867	0.46268	-0.386909	0.35242	0.169136	-0.169693	0.181141	0.603396
-4.34726	0.0408642	-1.43657	-0.258412	-0.466009	-0.223445	-0.369718	-0.804351	-0.737953	-0.552305	-0.34849	-0.425675	-1.12191	-0.174047	-0.544132	-0.360782	-0.609879	-0.42784	-0.062057	-0.431808	-0.362384	-0.241356	-0.54029	-0.800525	-0.461916	0.533916	-0.573934	0.645655	-0.506543	0.0735047	-0.106519	0.0998287	-0.8526	0.316528	-0.369423	-0.137554	-0.141357	0.491318	-0.973808	-0.14893	0.314843	-0.196788	0.437561	0.462817	-0.386146	0.352822	0.166722	-0.167035	0.181359	0.603117
-4.34628	0.0421502	-1.43694	-0.257077	-0.465679	-0.223591	-0.372634	-0.803818	-0.739088	-0.55265	-0.34784	-0.426747	-1.12166	-0.175073	-0.543051	-0.359814	-0.610639	-0.427801	-0.0625533	-0.432074	-0.362376	-0.241416	-0.539865	-0.800966	-0.462827	0.535675	-0.574409	0.645658	-0.506891	0.0736928	-0.104963	0.100669	-0.852178	0.316805	-0.368768	-0.137686	-0.141415	0.492551	-0.974206	-0.149586	0.315194	-0.197121	0.438253	0.462959	-0.385371	0.353229	0.164312	-0.164357	0.181577	0.602836
-4.3453	0.0434352	-1.4373	-0.255741	-0.465358	-0.223735	-0.375555	-0.803287	-0.740219	-0.553005	-0.347185	-0.427816	-1.12139	-0.176095	-0.541969	-0.358852	-0.611394	-0.427759	-0.0630518	-0.432334	-0.362372	-0.241471	-0.539433	-0.801395	-0.463734	0.537446	-0.574887	0.645657	-0.507233	0.0738764	-0.1034	0.101512	-0.851747	0.317073	-0.368106	-0.137808	-0.141475	0.493789	-0.974602	-0.150255	0.315543	-0.197466	0.438942	0.463106	-0.384584	0.353639	0.161907	-0.161658	0.181795	0.602552
-4.34431	0.0447191	-1.43767	-0.254404	-0.465047	-0.223877	-0.378483	-0.802758	-0.741347	-0.553369	-0.346524	-0.428882	-1.12112	-0.177113	-0.540885	-0.357895	-0.612145	-0.427714	-0.0635526	-0.432588	-0.362371	-0.241523	-0.538996	-0.801811	-0.464637	0.53923	-0.575368	0.645653	-0.507569	0.0740554	-0.101831	0.102357	-0.851306	0.31733	-0.367437	-0.13792	-0.141536	0.49503	-0.974995	-0.150937	0.315889	-0.197822	0.439629	0.463258	-0.383784	0.354053	0.159507	-0.158939	0.182013	0.602266
-4.34333	0.0460017	-1.43803	-0.253066	-0.464745	-0.224018	-0.381415	-0.802233	-0.742471	-0.553742	-0.345857	-0.429946	-1.12083	-0.178128	-0.539799	-0.356944	-0.612891	-0.427667	-0.0640555	-0.432836	-0.362374	-0.241571	-0.538553	-0.802216	-0.465534	0.541026	-0.575852	0.645644	-0.507899	0.0742299	-0.100256	0.103205	-0.850856	0.317578	-0.366761	-0.138022	-0.141598	0.496274	-0.975386	-0.151631	0.316232	-0.198188	0.440313	0.463414	-0.382973	0.354471	0.157112	-0.156199	0.182231	0.601977
-4.34235	0.0472829	-1.43838	-0.251727	-0.464452	-0.224157	-0.384353	-0.80171	-0.74359	-0.554124	-0.345185	-0.431007	-1.12053	-0.179139	-0.538712	-0.355999	-0.613634	-0.427618	-0.0645605	-0.433078	-0.36238	-0.241614	-0.538104	-0.802607	-0.466427	0.542834	-0.576339	0.645632	-0.508222	0.0743999	-0.0986746	0.104056	-0.850396	0.317815	-0.366078	-0.138114	-0.141661	0.497522	-0.975774	-0.152338	0.316572	-0.198566	0.440994	0.463576	-0.382149	0.354893	0.154723	-0.153441	0.182448	0.601686
-4.34136	0.0485625	-1.43874	-0.250387	-0.464167	-0.224293	-0.387295	-0.801189	-0.744706	-0.554515	-0.344508	-0.432065	-1.12021	-0.180146	-0.537624	-0.355059	-0.614373	-0.427566	-0.0650676	-0.433315	-0.362391	-0.241654	-0.53765	-0.802986	-0.467315	0.544655	-0.576829	0.645615	-0.508539	0.0745655	-0.0970874	0.104909	-0.849926	0.318041	-0.365388	-0.138196	-0.141725	0.498773	-0.97616	-0.153058	0.316909	-0.198954	0.441673	0.463742	-0.381314	0.355318	0.152339	-0.150662	0.182665	0.601392
-4.34038	0.0498403	-1.43909	-0.249047	-0.463892	-0.224428	-0.390241	-0.800672	-0.745819	-0.554915	-0.343825	-0.433121	-1.11989	-0.181149	-0.536534	-0.354126	-0.615107	-0.427512	-0.0655766	-0.433545	-0.362404	-0.24169	-0.53719	-0.803353	-0.468198	0.546488	-0.577322	0.645595	-0.508849	0.0747268	-0.0954945	0.105765	-0.849447	0.318257	-0.364691	-0.138267	-0.14179	0.500028	-0.976543	-0.15379	0.317244	-0.199353	0.442349	0.463912	-0.380466	0.355747	0.14996	-0.147865	0.182882	0.601095
-4.3394	0.0511162	-1.43944	-0.247705	-0.463626	-0.224561	-0.393191	-0.800157	-0.746927	-0.555323	-0.343136	-0.434174	-1.11955	-0.182148	-0.535443	-0.353198	-0.615837	-0.427455	-0.0660874	-0.43377	-0.362422	-0.241721	-0.536724	-0.803707	-0.469075	0.548333	-0.577819	0.645572	-0.509152	0.0748837	-0.0938959	0.106625	-0.848957	0.318462	-0.363986	-0.138329	-0.141857	0.501285	-0.976923	-0.154535	0.317575	-0.199763	0.443022	0.464087	-0.379607	0.356179	0.147587	-0.145048	0.183098	0.600796
-4.33841	0.05239	-1.43979	-0.246362	-0.463369	-0.224692	-0.396146	-0.799646	-0.748031	-0.55574	-0.342442	-0.435225	-1.11919	-0.183144	-0.53435	-0.352277	-0.616563	-0.427396	-0.0666	-0.433988	-0.362442	-0.241749	-0.536253	-0.804048	-0.469948	0.55019	-0.578318	0.645544	-0.509448	0.0750363	-0.092292	0.107487	-0.848457	0.318657	-0.363275	-0.13838	-0.141925	0.502546	-0.977301	-0.155293	0.317904	-0.200183	0.443692	0.464266	-0.378735	0.356615	0.145221	-0.142213	0.183313	0.600493
-4.33743	0.0536616	-1.44013	-0.245019	-0.463121	-0.224821	-0.399103	-0.799137	-0.749131	-0.556166	-0.341743	-0.436273	-1.11883	-0.184135	-0.533257	-0.351361	-0.617285	-0.427335	-0.0671143	-0.434201	-0.362466	-0.241773	-0.535777	-0.804377	-0.470815	0.552058	-0.578821	0.645513	-0.509738	0.0751846	-0.0906828	0.108353	-0.847947	0.31884	-0.362556	-0.138422	-0.141993	0.503811	-0.977676	-0.156062	0.318229	-0.200615	0.444359	0.46445	-0.377852	0.357054	0.14286	-0.139358	0.183528	0.600188
-4.33645	0.0549307	-1.44047	-0.243675	-0.462882	-0.224948	-0.402064	-0.798631	-0.750227	-0.5566	-0.341038	-0.437319	-1.11845	-0.185123	-0.532162	-0.350451	-0.618003	-0.427272	-0.0676303	-0.434408	-0.362494	-0.241793	-0.535295	-0.804693	-0.471676	0.553939	-0.579326	0.645479	-0.51002	0.0753287	-0.0890686	0.109223	-0.847427	0.319012	-0.361831	-0.138453	-0.142063	0.505078	-0.978048	-0.156844	0.318552	-0.201057	0.445022	0.464638	-0.376957	0.357497	0.140506	-0.136486	0.183743	0.59988
-4.33546	0.0561972	-1.44081	-0.242329	-0.462652	-0.225072	-0.405028	-0.798128	-0.751319	-0.557043	-0.340328	-0.438362	-1.11806	-0.186107	-0.531067	-0.349547	-0.618717	-0.427206	-0.0681478	-0.434608	-0.362524	-0.24181	-0.534808	-0.804996	-0.472532	0.55583	-0.579835	0.645442	-0.510295	0.0754686	-0.0874494	0.110096	-0.846895	0.319173	-0.361098	-0.138474	-0.142133	0.506348	-0.978418	-0.157639	0.318872	-0.201509	0.445683	0.46483	-0.37605	0.357943	0.138159	-0.133595	0.183956	0.599569
-4.33448	0.057461	-1.44115	-0.240983	-0.46243	-0.225195	-0.407994	-0.797628	-0.752407	-0.557494	-0.339612	-0.439403	-1.11765	-0.187088	-0.52997	-0.348649	-0.619427	-0.427139	-0.0686667	-0.434803	-0.362558	-0.241822	-0.534316	-0.805286	-0.473382	0.557734	-0.580346	0.645401	-0.510563	0.0756044	-0.0858255	0.110973	-0.846354	0.319322	-0.360358	-0.138486	-0.142205	0.507621	-0.978785	-0.158445	0.319188	-0.201972	0.44634	0.465027	-0.375131	0.358392	0.135818	-0.130686	0.184169	0.599255
-4.3335	0.0587219	-1.44148	-0.239636	-0.462218	-0.225315	-0.410962	-0.797131	-0.753491	-0.557953	-0.338891	-0.440441	-1.11723	-0.188064	-0.528873	-0.347757	-0.620132	-0.427069	-0.0691871	-0.434992	-0.362595	-0.241831	-0.533819	-0.805564	-0.474226	0.559649	-0.580861	0.645357	-0.510824	0.075736	-0.0841971	0.111853	-0.845801	0.31946	-0.359611	-0.138487	-0.142277	0.508898	-0.979149	-0.159263	0.319502	-0.202446	0.446993	0.465227	-0.374201	0.358844	0.133484	-0.12776	0.18438	0.598938
-4.33252	0.0599797	-1.44182	-0.238287	-0.462014	-0.225432	-0.413932	-0.796637	-0.75457	-0.55842	-0.338165	-0.441476	-1.1168	-0.189037	-0.527775	-0.346872	-0.620834	-0.426997	-0.0697088	-0.435175	-0.362636	-0.241835	-0.533317	-0.805828	-0.475063	0.561575	-0.581379	0.645309	-0.511077	0.0758636	-0.0825644	0.112738	-0.845238	0.319585	-0.358857	-0.138478	-0.142351	0.510177	-0.979511	-0.160094	0.319813	-0.20293	0.447643	0.465432	-0.373259	0.3593	0.131157	-0.124816	0.184591	0.598618
-4.33153	0.0612342	-1.44215	-0.236938	-0.461819	-0.225548	-0.416904	-0.796146	-0.755646	-0.558895	-0.337433	-0.442509	-1.11635	-0.190006	-0.526676	-0.345992	-0.621531	-0.426923	-0.0702317	-0.435352	-0.362679	-0.241836	-0.53281	-0.80608	-0.475895	0.563512	-0.5819	0.645259	-0.511323	0.0759871	-0.0809274	0.113627	-0.844663	0.319699	-0.358096	-0.138459	-0.142425	0.511458	-0.97987	-0.160936	0.320121	-0.203424	0.44829	0.46564	-0.372305	0.359758	0.128837	-0.121855	0.184801	0.598295
-4.33055	0.0624853	-1.44247	-0.235588	-0.461632	-0.225661	-0.419878	-0.795659	-0.756717	-0.559378	-0.336696	-0.44354	-1.11589	-0.190971	-0.525576	-0.345118	-0.622224	-0.426847	-0.0707557	-0.435523	-0.362725	-0.241834	-0.532298	-0.806318	-0.476721	0.565461	-0.582424	0.645206	-0.511561	0.0761066	-0.0792864	0.114521	-0.844077	0.319801	-0.357327	-0.138429	-0.1425	0.512743	-0.980226	-0.16179	0.320426	-0.203929	0.448932	0.465852	-0.37134	0.360219	0.126525	-0.118877	0.185009	0.597968
-4.32957	0.0637329	-1.4428	-0.234237	-0.461454	-0.225772	-0.422852	-0.795174	-0.757784	-0.559869	-0.335954	-0.444568	-1.11542	-0.191932	-0.524475	-0.344251	-0.622913	-0.426769	-0.0712809	-0.435687	-0.362775	-0.241827	-0.531782	-0.806543	-0.47754	0.56742	-0.582951	0.64515	-0.511792	0.0762222	-0.0776416	0.115418	-0.843481	0.319891	-0.356551	-0.13839	-0.142576	0.51403	-0.98058	-0.162656	0.320728	-0.204443	0.449571	0.466068	-0.370363	0.360684	0.124221	-0.115882	0.185217	0.597639
-4.32858	0.0649767	-1.44312	-0.232886	-0.461285	-0.22588	-0.425828	-0.794693	-0.758846	-0.560368	-0.335206	-0.445593	-1.11493	-0.192889	-0.523374	-0.343389	-0.623599	-0.426689	-0.071807	-0.435846	-0.362827	-0.241817	-0.531261	-0.806756	-0.478353	0.569391	-0.583481	0.64509	-0.512015	0.0763338	-0.0759931	0.11632	-0.842872	0.319968	-0.355768	-0.138341	-0.142653	0.51532	-0.980931	-0.163534	0.321027	-0.204968	0.450206	0.466288	-0.369374	0.361151	0.121924	-0.112871	0.185423	0.597306
-4.3276	0.0662166	-1.44344	-0.231533	-0.461125	-0.225985	-0.428804	-0.794215	-0.759905	-0.560874	-0.334453	-0.446616	-1.11443	-0.193843	-0.522273	-0.342534	-0.62428	-0.426608	-0.072334	-0.435999	-0.362883	-0.241803	-0.530735	-0.806955	-0.479159	0.571372	-0.584014	0.645029	-0.51223	0.0764416	-0.0743412	0.117227	-0.842253	0.320033	-0.354978	-0.138282	-0.14273	0.516612	-0.981279	-0.164423	0.321323	-0.205503	0.450837	0.466511	-0.368374	0.361621	0.119635	-0.109843	0.185628	0.59697
-4.32662	0.0674525	-1.44375	-0.230179	-0.460973	-0.226088	-0.43178	-0.793741	-0.760959	-0.561387	-0.333695	-0.447637	-1.11391	-0.194793	-0.521171	-0.341685	-0.624957	-0.426524	-0.0728619	-0.436146	-0.362941	-0.241786	-0.530205	-0.807141	-0.479959	0.573363	-0.584551	0.644964	-0.512438	0.0765455	-0.0726859	0.118139	-0.841621	0.320085	-0.354181	-0.138213	-0.142808	0.517907	-0.981624	-0.165324	0.321617	-0.206048	0.451464	0.466738	-0.367363	0.362094	0.117354	-0.1068	0.185831	0.59663
-4.32563	0.0686842	-1.44407	-0.228824	-0.46083	-0.226189	-0.434756	-0.79327	-0.762008	-0.561908	-0.332931	-0.448655	-1.11338	-0.195739	-0.520068	-0.340842	-0.62563	-0.426439	-0.0733905	-0.436287	-0.363002	-0.241764	-0.529671	-0.807314	-0.480752	0.575365	-0.58509	0.644897	-0.512637	0.0766456	-0.0710275	0.119056	-0.840978	0.320125	-0.353377	-0.138134	-0.142887	0.519204	-0.981966	-0.166236	0.321907	-0.206604	0.452087	0.466968	-0.36634	0.362569	0.115082	-0.10374	0.186033	0.596288
-4.32465	0.0699115	-1.44438	-0.227469	-0.460695	-0.226287	-0.437732	-0.792802	-0.763053	-0.562436	-0.332163	-0.449671	-1.11283	-0.196681	-0.518966	-0.340006	-0.626299	-0.426352	-0.0739198	-0.436421	-0.363066	-0.24174	-0.529132	-0.807474	-0.481538	0.577378	-0.585632	0.644827	-0.512828	0.0767419	-0.0693662	0.119977	-0.840323	0.320152	-0.352565	-0.138044	-0.142966	0.520504	-0.982306	-0.167159	0.322195	-0.207169	0.452706	0.467202	-0.365306	0.363048	0.112818	-0.100665	0.186233	0.595942
-4.32367	0.0711343	-1.44469	-0.226112	-0.460568	-0.226382	-0.440707	-0.792338	-0.764094	-0.562971	-0.331389	-0.450685	-1.11227	-0.19762	-0.517863	-0.339175	-0.626964	-0.426263	-0.0744497	-0.43655	-0.363133	-0.241711	-0.528589	-0.80762	-0.482317	0.579401	-0.586178	0.644755	-0.513012	0.0768345	-0.0677021	0.120904	-0.839656	0.320165	-0.351746	-0.137945	-0.143046	0.521806	-0.982643	-0.168093	0.32248	-0.207743	0.45332	0.467439	-0.36426	0.363528	0.110563	-0.0975749	0.186432	0.595592
-4.32269	0.0723523	-1.445	-0.224755	-0.46045	-0.226475	-0.443681	-0.791877	-0.76513	-0.563513	-0.33061	-0.451696	-1.1117	-0.198555	-0.516759	-0.338351	-0.627625	-0.426173	-0.0749801	-0.436673	-0.363202	-0.241679	-0.528042	-0.807753	-0.483088	0.581433	-0.586726	0.64468	-0.513187	0.0769235	-0.0660355	0.121836	-0.838977	0.320166	-0.35092	-0.137836	-0.143126	0.52311	-0.982977	-0.169039	0.322761	-0.208328	0.45393	0.467679	-0.363204	0.364011	0.108316	-0.0944695	0.186629	0.59524
-4.3217	0.0735656	-1.4453	-0.223397	-0.460341	-0.226564	-0.446654	-0.79142	-0.766162	-0.564062	-0.329825	-0.452705	-1.1111	-0.199486	-0.515656	-0.337533	-0.628282	-0.426081	-0.0755109	-0.43679	-0.363274	-0.241644	-0.527491	-0.807873	-0.483853	0.583476	-0.587278	0.644603	-0.513354	0.0770087	-0.0643665	0.122773	-0.838286	0.320153	-0.350087	-0.137718	-0.143207	0.524416	-0.983308	-0.169996	0.323041	-0.208922	0.454536	0.467922	-0.362136	0.364497	0.106079	-0.0913493	0.186825	0.594883
-4.32072	0.0747738	-1.44561	-0.222038	-0.460239	-0.226651	-0.449626	-0.790966	-0.767189	-0.564618	-0.329036	-0.453712	-1.1105	-0.200413	-0.514552	-0.336722	-0.628935	-0.425988	-0.076042	-0.4369	-0.363349	-0.241605	-0.526936	-0.80798	-0.484611	0.585529	-0.587832	0.644523	-0.513512	0.0770903	-0.0626953	0.123716	-0.837583	0.320127	-0.349247	-0.137589	-0.143289	0.525724	-0.983636	-0.170963	0.323317	-0.209526	0.455137	0.468169	-0.361056	0.364985	0.10385	-0.0882146	0.187018	0.594523
-4.31974	0.0759768	-1.44591	-0.220677	-0.460146	-0.226735	-0.452595	-0.790516	-0.768211	-0.565181	-0.328242	-0.454716	-1.10988	-0.201337	-0.513448	-0.335917	-0.629584	-0.425893	-0.0765734	-0.437005	-0.363426	-0.241563	-0.526378	-0.808073	-0.485361	0.587591	-0.588389	0.644442	-0.513663	0.0771684	-0.061022	0.124665	-0.836867	0.320088	-0.3484	-0.13745	-0.14337	0.527035	-0.983961	-0.171942	0.32359	-0.210139	0.455733	0.468418	-0.359966	0.365475	0.101631	-0.0850655	0.18721	0.59416
-4.31875	0.0771745	-1.44621	-0.219316	-0.460061	-0.226817	-0.455563	-0.790069	-0.769229	-0.56575	-0.327442	-0.455718	-1.10924	-0.202256	-0.512344	-0.335118	-0.630229	-0.425796	-0.077105	-0.437104	-0.363506	-0.241517	-0.525815	-0.808153	-0.486103	0.589663	-0.58895	0.644358	-0.513804	0.0772429	-0.0593469	0.125619	-0.836138	0.320035	-0.347545	-0.137302	-0.143453	0.528347	-0.984283	-0.172931	0.323861	-0.210762	0.456325	0.46867	-0.358865	0.365968	0.0994219	-0.0819024	0.1874	0.593793
-4.31777	0.0783668	-1.4465	-0.217955	-0.459985	-0.226895	-0.458529	-0.789626	-0.770242	-0.566326	-0.326637	-0.456718	-1.10859	-0.203172	-0.51124	-0.334325	-0.63087	-0.425698	-0.0776367	-0.437196	-0.363589	-0.241468	-0.525249	-0.808219	-0.486838	0.591744	-0.589513	0.644272	-0.513938	0.0773139	-0.0576702	0.126579	-0.835397	0.319968	-0.346683	-0.137144	-0.143535	0.529661	-0.984602	-0.173931	0.324129	-0.211395	0.456912	0.468925	-0.357752	0.366463	0.097222	-0.0787255	0.187588	0.593423
-4.31679	0.0795534	-1.4468	-0.216592	-0.459916	-0.226971	-0.461492	-0.789187	-0.771251	-0.566908	-0.325828	-0.457716	-1.10792	-0.204085	-0.510137	-0.333539	-0.631508	-0.425599	-0.0781683	-0.437283	-0.363673	-0.241415	-0.524679	-0.808272	-0.487565	0.593834	-0.59008	0.644184	-0.514062	0.0773815	-0.0559919	0.127545	-0.834644	0.319888	-0.345814	-0.136976	-0.143618	0.530977	-0.984919	-0.174941	0.324395	-0.212036	0.457494	0.469183	-0.356629	0.366959	0.095032	-0.075535	0.187774	0.593049
-4.3158	0.0807342	-1.44709	-0.215228	-0.459855	-0.227043	-0.464452	-0.788752	-0.772255	-0.567497	-0.325013	-0.458711	-1.10724	-0.204994	-0.509033	-0.332759	-0.632141	-0.425498	-0.0786999	-0.437364	-0.363761	-0.241359	-0.524106	-0.808312	-0.488285	0.595934	-0.590649	0.644094	-0.514179	0.0774456	-0.0543125	0.128518	-0.833877	0.319793	-0.344938	-0.136798	-0.143701	0.532295	-0.985232	-0.175962	0.324657	-0.212687	0.458071	0.469443	-0.355495	0.367458	0.092852	-0.0723312	0.187958	0.592671
-4.31482	0.0819091	-1.44738	-0.213864	-0.459803	-0.227113	-0.467409	-0.78832	-0.773254	-0.568091	-0.324193	-0.459705	-1.10655	-0.205898	-0.50793	-0.331985	-0.632771	-0.425397	-0.0792314	-0.437439	-0.36385	-0.2413	-0.52353	-0.808338	-0.488996	0.598042	-0.591221	0.644003	-0.514286	0.0775063	-0.0526319	0.129496	-0.833098	0.319685	-0.344055	-0.136611	-0.143784	0.533614	-0.985542	-0.176993	0.324917	-0.213347	0.458643	0.469706	-0.35435	0.367959	0.0906822	-0.0691144	0.188139	0.59229
-4.31384	0.0830779	-1.44767	-0.212499	-0.459758	-0.227179	-0.470363	-0.787892	-0.774249	-0.568692	-0.323369	-0.460696	-1.10583	-0.2068	-0.506826	-0.331218	-0.633397	-0.425293	-0.0797626	-0.437507	-0.363942	-0.241238	-0.52295	-0.808351	-0.4897	0.60016	-0.591796	0.643909	-0.514385	0.0775637	-0.0509504	0.130481	-0.832305	0.319562	-0.343165	-0.136414	-0.143868	0.534935	-0.985849	-0.178034	0.325175	-0.214015	0.45921	0.469971	-0.353194	0.368462	0.0885227	-0.0658848	0.188319	0.591905
-4.31286	0.0842404	-1.44795	-0.211132	-0.459722	-0.227243	-0.473313	-0.787468	-0.775239	-0.569299	-0.322539	-0.461685	-1.1051	-0.207697	-0.505723	-0.330457	-0.634019	-0.425189	-0.0802935	-0.43757	-0.364037	-0.241172	-0.522367	-0.80835	-0.490395	0.602286	-0.592374	0.643814	-0.514475	0.0776177	-0.0492681	0.131472	-0.831499	0.319425	-0.342268	-0.136208	-0.143951	0.536257	-0.986153	-0.179086	0.32543	-0.214693	0.459772	0.470239	-0.352028	0.368966	0.0863737	-0.0626426	0.188496	0.591516
-4.31187	0.0853966	-1.44824	-0.209765	-0.459693	-0.227303	-0.476259	-0.787048	-0.776224	-0.569912	-0.321705	-0.462672	-1.10436	-0.208591	-0.504621	-0.329703	-0.634637	-0.425084	-0.080824	-0.437627	-0.364134	-0.241103	-0.521781	-0.808336	-0.491083	0.60442	-0.592955	0.643717	-0.514556	0.0776685	-0.0475853	0.132469	-0.83068	0.319274	-0.341363	-0.135992	-0.144035	0.537581	-0.986454	-0.180147	0.325682	-0.21538	0.460328	0.470508	-0.350851	0.369473	0.0842354	-0.0593882	0.188671	0.591124
-4.31089	0.0865462	-1.44852	-0.208397	-0.459672	-0.22736	-0.479201	-0.786632	-0.777204	-0.57053	-0.320865	-0.463656	-1.1036	-0.209481	-0.503519	-0.328954	-0.635251	-0.424977	-0.081354	-0.437678	-0.364232	-0.241031	-0.521193	-0.808309	-0.491762	0.606563	-0.593539	0.643618	-0.514628	0.0777161	-0.0459022	0.133473	-0.829848	0.319108	-0.340452	-0.135766	-0.144118	0.538906	-0.986752	-0.181218	0.325932	-0.216076	0.46088	0.47078	-0.349663	0.369981	0.0821079	-0.0561218	0.188843	0.590728
-4.30991	0.087689	-1.4488	-0.207029	-0.459659	-0.227414	-0.482139	-0.78622	-0.77818	-0.571154	-0.320021	-0.464639	-1.10282	-0.210368	-0.502417	-0.328213	-0.635861	-0.42487	-0.0818834	-0.437723	-0.364334	-0.240956	-0.520601	-0.808268	-0.492433	0.608714	-0.594126	0.643518	-0.514692	0.0777604	-0.0442189	0.134484	-0.829002	0.318928	-0.339533	-0.135532	-0.144202	0.540232	-0.987047	-0.1823	0.32618	-0.21678	0.461425	0.471054	-0.348465	0.37049	0.0799914	-0.0528436	0.189014	0.590328
-4.30892	0.0888251	-1.44907	-0.205659	-0.459654	-0.227465	-0.485072	-0.785811	-0.77915	-0.571784	-0.319172	-0.46562	-1.10203	-0.211251	-0.501315	-0.327477	-0.636468	-0.424761	-0.0824122	-0.437762	-0.364437	-0.240877	-0.520006	-0.808213	-0.493095	0.610873	-0.594715	0.643416	-0.514746	0.0778015	-0.0425357	0.135502	-0.828143	0.318733	-0.338608	-0.135287	-0.144285	0.54156	-0.987339	-0.18339	0.326425	-0.217492	0.461966	0.471331	-0.347256	0.371002	0.077886	-0.0495539	0.189181	0.589925
-4.30794	0.0899541	-1.44935	-0.204289	-0.459656	-0.227513	-0.488	-0.785407	-0.780116	-0.572419	-0.318319	-0.466599	-1.10122	-0.21213	-0.500214	-0.326749	-0.637071	-0.424652	-0.0829403	-0.437795	-0.364542	-0.240796	-0.519409	-0.808145	-0.493749	0.61304	-0.595307	0.643313	-0.514792	0.0778396	-0.0408526	0.136527	-0.82727	0.318523	-0.337675	-0.135033	-0.144368	0.542888	-0.987627	-0.184491	0.326668	-0.218214	0.462501	0.471608	-0.346037	0.371514	0.075792	-0.0462529	0.189347	0.589517
-4.30696	0.091076	-1.44962	-0.202918	-0.459666	-0.227558	-0.490923	-0.785007	-0.781077	-0.573059	-0.31746	-0.467576	-1.10039	-0.213006	-0.499114	-0.326026	-0.63767	-0.424542	-0.0834675	-0.437823	-0.36465	-0.240712	-0.518809	-0.808064	-0.494395	0.615215	-0.595903	0.643209	-0.514828	0.0778745	-0.0391699	0.137558	-0.826383	0.318298	-0.336736	-0.13477	-0.144451	0.544218	-0.987912	-0.185601	0.326908	-0.218943	0.46303	0.471888	-0.344807	0.372029	0.0737095	-0.042941	0.189509	0.589106
-4.30597	0.0921906	-1.4499	-0.201546	-0.459683	-0.227599	-0.49384	-0.784611	-0.782033	-0.573705	-0.316597	-0.468551	-1.09955	-0.213878	-0.498014	-0.32531	-0.638266	-0.42443	-0.0839938	-0.437844	-0.36476	-0.240624	-0.518207	-0.807969	-0.495032	0.617398	-0.5965	0.643103	-0.514855	0.0779063	-0.0374878	0.138597	-0.825483	0.318059	-0.335789	-0.134498	-0.144534	0.545549	-0.988194	-0.18672	0.327147	-0.219681	0.463553	0.47217	-0.343568	0.372544	0.0716386	-0.0396184	0.189669	0.588691
-4.30499	0.0932977	-1.45017	-0.200173	-0.459708	-0.227637	-0.496752	-0.784219	-0.782984	-0.574355	-0.315729	-0.469524	-1.09869	-0.214746	-0.496915	-0.3246	-0.638858	-0.424318	-0.0845191	-0.43786	-0.364871	-0.240534	-0.517602	-0.807861	-0.49566	0.619587	-0.597101	0.642996	-0.514873	0.0779352	-0.0358064	0.139643	-0.824568	0.317804	-0.334836	-0.134217	-0.144617	0.54688	-0.988473	-0.187848	0.327383	-0.220427	0.464071	0.472453	-0.342318	0.373061	0.0695795	-0.0362854	0.189827	0.588272
-4.30401	0.0943973	-1.45044	-0.1988	-0.45974	-0.227672	-0.499657	-0.783831	-0.783929	-0.575011	-0.314856	-0.470495	-1.09781	-0.215611	-0.495817	-0.323897	-0.639446	-0.424206	-0.0850434	-0.43787	-0.364985	-0.240441	-0.516995	-0.807739	-0.496279	0.621784	-0.597704	0.642888	-0.514882	0.077961	-0.034126	0.140696	-0.82364	0.317534	-0.333875	-0.133926	-0.144699	0.548213	-0.988748	-0.188986	0.327616	-0.221182	0.464583	0.472737	-0.341058	0.373579	0.0675323	-0.0329421	0.189981	0.58785
-4.30302	0.0954892	-1.4507	-0.197426	-0.45978	-0.227703	-0.502557	-0.783447	-0.78487	-0.575672	-0.313979	-0.471464	-1.09692	-0.216472	-0.494719	-0.3232	-0.64003	-0.424092	-0.0855665	-0.437874	-0.365101	-0.240345	-0.516386	-0.807604	-0.496889	0.623988	-0.59831	0.642778	-0.514882	0.0779839	-0.0324468	0.141757	-0.822697	0.317249	-0.332908	-0.133626	-0.144781	0.549546	-0.98902	-0.190132	0.327848	-0.221944	0.465089	0.473024	-0.339787	0.374098	0.0654973	-0.0295889	0.190133	0.587423
-4.30204	0.0965731	-1.45097	-0.196051	-0.459827	-0.227731	-0.50545	-0.783068	-0.785806	-0.576337	-0.313097	-0.472431	-1.09601	-0.21733	-0.493622	-0.32251	-0.640611	-0.423978	-0.0860883	-0.437872	-0.365218	-0.240246	-0.515775	-0.807455	-0.497491	0.626199	-0.598919	0.642668	-0.514872	0.0780039	-0.0307688	0.142825	-0.82174	0.316949	-0.331934	-0.133317	-0.144862	0.55088	-0.989289	-0.191288	0.328078	-0.222714	0.465589	0.473311	-0.338507	0.374618	0.0634745	-0.0262261	0.190282	0.586993
-4.30106	0.0976491	-1.45123	-0.194675	-0.459881	-0.227756	-0.508336	-0.782692	-0.786737	-0.577007	-0.312211	-0.473397	-1.09509	-0.218184	-0.492526	-0.321826	-0.641189	-0.423863	-0.0866089	-0.437864	-0.365338	-0.240144	-0.515161	-0.807293	-0.498083	0.628417	-0.59953	0.642557	-0.514854	0.0780209	-0.0290924	0.143901	-0.820769	0.316633	-0.330953	-0.132999	-0.144943	0.552214	-0.989554	-0.192452	0.328305	-0.223492	0.466083	0.4736	-0.337217	0.37514	0.0614641	-0.0228539	0.190429	0.586559
-4.30008	0.0987169	-1.45149	-0.193299	-0.459943	-0.227777	-0.511216	-0.782322	-0.787663	-0.577682	-0.31132	-0.474361	-1.09414	-0.219035	-0.491431	-0.321149	-0.641762	-0.423748	-0.087128	-0.437851	-0.365459	-0.24004	-0.514546	-0.807118	-0.498666	0.630641	-0.600144	0.642444	-0.514826	0.0780352	-0.0274176	0.144984	-0.819783	0.316302	-0.329965	-0.132673	-0.145023	0.553549	-0.989816	-0.193625	0.328531	-0.224278	0.466571	0.473889	-0.335917	0.375662	0.0594663	-0.0194725	0.190572	0.586121
-4.29909	0.0997764	-1.45175	-0.191922	-0.460012	-0.227795	-0.514088	-0.781955	-0.788584	-0.578361	-0.310424	-0.475323	-1.09318	-0.219882	-0.490336	-0.320477	-0.642332	-0.423632	-0.0876456	-0.437832	-0.365583	-0.239932	-0.513929	-0.806929	-0.49924	0.632872	-0.600761	0.642331	-0.514788	0.0780466	-0.0257447	0.146075	-0.818783	0.315955	-0.32897	-0.132337	-0.145103	0.554884	-0.990074	-0.194806	0.328755	-0.225071	0.467053	0.47418	-0.334608	0.376185	0.0574813	-0.0160823	0.190713	0.585679
-4.29811	0.100827	-1.45201	-0.190544	-0.460087	-0.227809	-0.516953	-0.781593	-0.7895	-0.579045	-0.309524	-0.476283	-1.09221	-0.220725	-0.489243	-0.319813	-0.642899	-0.423516	-0.0881617	-0.437807	-0.365708	-0.239823	-0.51331	-0.806726	-0.499805	0.635109	-0.60138	0.642217	-0.514741	0.0780552	-0.0240739	0.147174	-0.817769	0.315592	-0.327969	-0.131993	-0.145182	0.55622	-0.990329	-0.195996	0.328977	-0.225872	0.467528	0.474472	-0.333288	0.376709	0.0555091	-0.0126834	0.19085	0.585233
-4.29713	0.10187	-1.45227	-0.189166	-0.46017	-0.22782	-0.51981	-0.781235	-0.79041	-0.579733	-0.30862	-0.477242	-1.09121	-0.221565	-0.48815	-0.319155	-0.643462	-0.4234	-0.0886761	-0.437777	-0.365835	-0.23971	-0.51269	-0.806511	-0.500361	0.637352	-0.602002	0.642102	-0.514685	0.078061	-0.0224053	0.148281	-0.816739	0.315214	-0.32696	-0.131639	-0.14526	0.557555	-0.990581	-0.197194	0.329197	-0.22668	0.467997	0.474765	-0.331959	0.377233	0.0535499	-0.00927622	0.190985	0.584783
-4.29614	0.102904	-1.45252	-0.187787	-0.46026	-0.227827	-0.522659	-0.780881	-0.791315	-0.580425	-0.307711	-0.478199	-1.0902	-0.222402	-0.487059	-0.318503	-0.644021	-0.423283	-0.0891888	-0.437741	-0.365964	-0.239595	-0.512068	-0.806281	-0.500907	0.6396	-0.602626	0.641987	-0.514619	0.0780642	-0.0207392	0.149396	-0.815696	0.31482	-0.325945	-0.131277	-0.145337	0.558891	-0.990828	-0.1984	0.329415	-0.227496	0.46846	0.475058	-0.330621	0.377758	0.0516039	-0.00586096	0.191116	0.58433
-4.29516	0.103929	-1.45278	-0.186407	-0.460357	-0.227831	-0.5255	-0.780532	-0.792216	-0.581121	-0.306798	-0.479154	-1.08917	-0.223235	-0.485968	-0.317857	-0.644577	-0.423166	-0.0896997	-0.437699	-0.366094	-0.239478	-0.511445	-0.806039	-0.501444	0.641855	-0.603253	0.641871	-0.514544	0.0780646	-0.0190756	0.150519	-0.814637	0.31441	-0.324924	-0.130907	-0.145414	0.560227	-0.991073	-0.199614	0.329631	-0.228318	0.468916	0.475353	-0.329273	0.378284	0.0496713	-0.00243789	0.191244	0.583872
-4.29418	0.104945	-1.45303	-0.185027	-0.46046	-0.227832	-0.528333	-0.780187	-0.793111	-0.58182	-0.305881	-0.480108	-1.08813	-0.224064	-0.484879	-0.317218	-0.64513	-0.423048	-0.0902086	-0.437652	-0.366226	-0.239358	-0.510821	-0.805783	-0.501971	0.644115	-0.603882	0.641755	-0.514459	0.0780624	-0.0174148	0.15165	-0.813563	0.313985	-0.323895	-0.130528	-0.14549	0.561564	-0.991314	-0.200837	0.329846	-0.229148	0.469366	0.475647	-0.327916	0.37881	0.0477521	0.000992734	0.19137	0.583411
-4.29319	0.105951	-1.45328	-0.183646	-0.46057	-0.227829	-0.531157	-0.779847	-0.794	-0.582524	-0.304959	-0.48106	-1.08706	-0.224891	-0.483791	-0.316586	-0.645679	-0.42293	-0.0907156	-0.437599	-0.36636	-0.239235	-0.510195	-0.805514	-0.502489	0.64638	-0.604513	0.641637	-0.514365	0.0780576	-0.015757	0.15279	-0.812475	0.313543	-0.32286	-0.13014	-0.145564	0.562899	-0.991551	-0.202067	0.33006	-0.229985	0.46981	0.475943	-0.326549	0.379337	0.0458465	0.00443063	0.191492	0.582946
-4.29221	0.106949	-1.45353	-0.182264	-0.460687	-0.227822	-0.533973	-0.779512	-0.794885	-0.583232	-0.304033	-0.48201	-1.08598	-0.225713	-0.482704	-0.31596	-0.646225	-0.422813	-0.0912205	-0.43754	-0.366496	-0.23911	-0.509568	-0.805232	-0.502997	0.64865	-0.605147	0.64152	-0.514262	0.0780502	-0.0141023	0.153937	-0.811371	0.313085	-0.321819	-0.129744	-0.145638	0.564235	-0.991784	-0.203304	0.330272	-0.230828	0.470246	0.476238	-0.325173	0.379864	0.0439547	0.00787555	0.191611	0.582477
-4.29123	0.107937	-1.45378	-0.180882	-0.460811	-0.227812	-0.536779	-0.77918	-0.795764	-0.583943	-0.303103	-0.48296	-1.08488	-0.226532	-0.481618	-0.31534	-0.646767	-0.422695	-0.0917232	-0.437476	-0.366633	-0.238983	-0.50894	-0.804936	-0.503495	0.650925	-0.605784	0.641402	-0.514149	0.0780402	-0.012451	0.155093	-0.810252	0.312611	-0.320771	-0.12934	-0.14571	0.565571	-0.992014	-0.204549	0.330482	-0.231678	0.470676	0.476534	-0.323788	0.380391	0.0420768	0.0113272	0.191726	0.582004
-4.29025	0.108916	-1.45402	-0.1795	-0.460941	-0.227798	-0.539576	-0.778854	-0.796638	-0.584658	-0.302169	-0.483907	-1.08377	-0.227348	-0.480533	-0.314726	-0.647306	-0.422577	-0.0922237	-0.437406	-0.366772	-0.238854	-0.508311	-0.804627	-0.503984	0.653206	-0.606422	0.641284	-0.514026	0.0780278	-0.0108032	0.156258	-0.809118	0.312121	-0.319716	-0.128927	-0.145782	0.566906	-0.992241	-0.205802	0.330691	-0.232535	0.471099	0.47683	-0.322394	0.380918	0.0402129	0.0147854	0.191839	0.581527
-4.28926	0.109885	-1.45427	-0.178116	-0.461077	-0.22778	-0.542364	-0.778532	-0.797507	-0.585376	-0.30123	-0.484853	-1.08263	-0.22816	-0.47945	-0.314119	-0.647841	-0.422459	-0.0927219	-0.437331	-0.366912	-0.238722	-0.507682	-0.804305	-0.504463	0.65549	-0.607063	0.641165	-0.513894	0.0780128	-0.00915905	0.157431	-0.807969	0.311615	-0.318655	-0.128507	-0.145852	0.568241	-0.992463	-0.207061	0.330899	-0.233399	0.471515	0.477127	-0.320991	0.381446	0.0383632	0.0182497	0.191948	0.581046
-4.28828	0.110844	-1.45451	-0.176733	-0.461221	-0.227759	-0.545142	-0.778215	-0.79837	-0.586097	-0.300288	-0.485798	-1.08148	-0.228969	-0.478368	-0.313519	-0.648373	-0.422341	-0.0932177	-0.437251	-0.367054	-0.238588	-0.507052	-0.80397	-0.504932	0.657779	-0.607706	0.641046	-0.513752	0.0779953	-0.00751877	0.158613	-0.806805	0.311092	-0.317587	-0.128078	-0.145921	0.569575	-0.992682	-0.208328	0.331105	-0.234268	0.471925	0.477423	-0.319579	0.381973	0.0365278	0.0217201	0.192053	0.580562
-4.2873	0.111794	-1.45476	-0.175349	-0.46137	-0.227735	-0.54791	-0.777902	-0.799229	-0.586822	-0.299341	-0.486741	-1.08031	-0.229775	-0.477287	-0.312925	-0.648902	-0.422223	-0.093711	-0.437165	-0.367197	-0.238452	-0.506421	-0.803622	-0.505391	0.660072	-0.608351	0.640927	-0.513601	0.0779754	-0.00588254	0.159803	-0.805625	0.310553	-0.316513	-0.127641	-0.145989	0.570909	-0.992897	-0.209602	0.331311	-0.235144	0.472327	0.477719	-0.318159	0.382501	0.0347069	0.0251961	0.192156	0.580073
-4.28631	0.112733	-1.455	-0.173964	-0.461526	-0.227706	-0.550668	-0.777594	-0.800081	-0.587549	-0.29839	-0.487683	-1.07912	-0.230577	-0.476207	-0.312337	-0.649428	-0.422105	-0.0942018	-0.437073	-0.367342	-0.238313	-0.505789	-0.80326	-0.50584	0.66237	-0.608999	0.640808	-0.51344	0.0779531	-0.00425052	0.161002	-0.80443	0.309998	-0.315432	-0.127196	-0.146055	0.572242	-0.993108	-0.210883	0.331515	-0.236026	0.472723	0.478015	-0.316729	0.383028	0.0329005	0.0286775	0.192255	0.579581
-4.28533	0.113662	-1.45524	-0.172579	-0.461688	-0.227674	-0.553416	-0.77729	-0.800929	-0.58828	-0.297436	-0.488624	-1.07791	-0.231376	-0.475129	-0.311755	-0.64995	-0.421988	-0.0946899	-0.436976	-0.367489	-0.238173	-0.505157	-0.802886	-0.50628	0.664671	-0.609648	0.640689	-0.51327	0.0779284	-0.0026229	0.16221	-0.803219	0.309426	-0.314346	-0.126743	-0.14612	0.573574	-0.993315	-0.21217	0.331718	-0.236915	0.473111	0.478311	-0.315291	0.383555	0.0311089	0.0321641	0.192351	0.579085
-4.28435	0.114581	-1.45548	-0.171193	-0.461856	-0.227639	-0.556153	-0.776992	-0.801771	-0.589013	-0.296477	-0.489563	-1.07669	-0.232171	-0.474053	-0.31118	-0.650469	-0.421871	-0.0951753	-0.436874	-0.367637	-0.238031	-0.504525	-0.802498	-0.506709	0.666975	-0.6103	0.64057	-0.51309	0.0779014	-0.000999852	0.163427	-0.801993	0.308838	-0.313252	-0.126283	-0.146183	0.574905	-0.993518	-0.213465	0.33192	-0.237809	0.473492	0.478606	-0.313845	0.384082	0.0293322	0.0356556	0.192443	0.578585
-4.28336	0.11549	-1.45571	-0.169807	-0.46203	-0.227599	-0.558879	-0.776698	-0.802607	-0.58975	-0.295514	-0.490501	-1.07545	-0.232963	-0.472977	-0.310611	-0.650985	-0.421754	-0.0956579	-0.436767	-0.367786	-0.237886	-0.503893	-0.802097	-0.507128	0.669283	-0.610954	0.640451	-0.5129	0.0778721	0.000618458	0.164653	-0.800751	0.308233	-0.312153	-0.125814	-0.146244	0.576235	-0.993718	-0.214765	0.332122	-0.238709	0.473866	0.478901	-0.31239	0.384609	0.0275704	0.0391518	0.192532	0.578081
-4.28238	0.116388	-1.45595	-0.168421	-0.46221	-0.227556	-0.561595	-0.776409	-0.803438	-0.590489	-0.294548	-0.491438	-1.07419	-0.233752	-0.471904	-0.310048	-0.651497	-0.421637	-0.0961376	-0.436654	-0.367937	-0.23774	-0.503261	-0.801684	-0.507537	0.671595	-0.611609	0.640332	-0.512701	0.0778404	0.00223185	0.165888	-0.799493	0.307612	-0.311047	-0.125338	-0.146304	0.577565	-0.993913	-0.216072	0.332322	-0.239614	0.474233	0.479196	-0.310927	0.385135	0.0258237	0.0426523	0.192617	0.577574
-4.2814	0.117275	-1.45619	-0.167034	-0.462397	-0.227509	-0.564299	-0.776125	-0.804264	-0.591231	-0.293578	-0.492373	-1.07291	-0.234538	-0.470831	-0.309492	-0.652007	-0.421521	-0.0966143	-0.436536	-0.368089	-0.237592	-0.502628	-0.801257	-0.507936	0.673909	-0.612267	0.640213	-0.512493	0.0778065	0.00384016	0.167132	-0.798219	0.306974	-0.309935	-0.124855	-0.146363	0.578893	-0.994105	-0.217385	0.332522	-0.240525	0.474593	0.479489	-0.309455	0.38566	0.0240923	0.0461569	0.192698	0.577062
-4.28041	0.118152	-1.45642	-0.165647	-0.462589	-0.227459	-0.566992	-0.775845	-0.805084	-0.591975	-0.292604	-0.493307	-1.07161	-0.23532	-0.469761	-0.308942	-0.652513	-0.421405	-0.097088	-0.436413	-0.368243	-0.237441	-0.501996	-0.800818	-0.508324	0.676226	-0.612927	0.640095	-0.512274	0.0777704	0.00544321	0.168385	-0.79693	0.30632	-0.308817	-0.124364	-0.146419	0.58022	-0.994292	-0.218704	0.332721	-0.241442	0.474945	0.479782	-0.307975	0.386185	0.0223763	0.0496654	0.192777	0.576547
-4.27943	0.119018	-1.45666	-0.16426	-0.462787	-0.227405	-0.569673	-0.77557	-0.805899	-0.592721	-0.291626	-0.49424	-1.0703	-0.236099	-0.468692	-0.308398	-0.653016	-0.42129	-0.0975586	-0.436284	-0.368398	-0.23729	-0.501363	-0.800366	-0.508703	0.678546	-0.613588	0.639976	-0.512047	0.077732	0.00704083	0.169647	-0.795625	0.305649	-0.307693	-0.123866	-0.146474	0.581546	-0.994476	-0.220029	0.332919	-0.242364	0.47529	0.480074	-0.306488	0.386709	0.0206758	0.0531774	0.192851	0.576028
-4.27845	0.119873	-1.45689	-0.162872	-0.46299	-0.227347	-0.572343	-0.7753	-0.806708	-0.59347	-0.290645	-0.495172	-1.06896	-0.236874	-0.467624	-0.307861	-0.653516	-0.421176	-0.098026	-0.436151	-0.368555	-0.237136	-0.500731	-0.799901	-0.509071	0.680869	-0.614251	0.639858	-0.511809	0.0776915	0.00863286	0.170918	-0.794304	0.304961	-0.306562	-0.12336	-0.146527	0.58287	-0.994655	-0.22136	0.333117	-0.243291	0.475627	0.480365	-0.304992	0.387233	0.0189909	0.0566928	0.192922	0.575506
-4.27747	0.120717	-1.45712	-0.161484	-0.4632	-0.227285	-0.575001	-0.775035	-0.807512	-0.594221	-0.28966	-0.496103	-1.06761	-0.237647	-0.466558	-0.30733	-0.654013	-0.421061	-0.0984901	-0.436012	-0.368713	-0.236981	-0.5001	-0.799423	-0.509429	0.683193	-0.614916	0.639741	-0.511562	0.0776488	0.0102191	0.172198	-0.792967	0.304257	-0.305426	-0.122848	-0.146577	0.584193	-0.99483	-0.222696	0.333314	-0.244223	0.475957	0.480656	-0.303488	0.387755	0.0173217	0.0602113	0.19299	0.57498
-4.27648	0.121549	-1.45735	-0.160096	-0.463414	-0.22722	-0.577647	-0.774775	-0.80831	-0.594974	-0.288671	-0.497033	-1.06624	-0.238416	-0.465494	-0.306805	-0.654507	-0.420948	-0.0989508	-0.435868	-0.368872	-0.236824	-0.499469	-0.798932	-0.509776	0.68552	-0.615583	0.639623	-0.511306	0.077604	0.0117995	0.173488	-0.791614	0.303535	-0.304284	-0.122328	-0.146626	0.585514	-0.995001	-0.224038	0.333511	-0.24516	0.47628	0.480944	-0.301977	0.388277	0.0156684	0.0637325	0.193054	0.57445
-4.2755	0.12237	-1.45758	-0.158707	-0.463635	-0.227151	-0.58028	-0.77452	-0.809103	-0.595729	-0.287679	-0.497961	-1.06485	-0.239182	-0.464431	-0.306286	-0.654998	-0.420835	-0.0994081	-0.43572	-0.369032	-0.236665	-0.498838	-0.798429	-0.510113	0.687849	-0.616252	0.639507	-0.51104	0.0775571	0.0133737	0.174787	-0.790245	0.302797	-0.303135	-0.121801	-0.146673	0.586834	-0.995168	-0.225386	0.333707	-0.246102	0.476594	0.481232	-0.300458	0.388798	0.0140311	0.0672563	0.193114	0.573916
-4.27452	0.12318	-1.45781	-0.157319	-0.463861	-0.227078	-0.582901	-0.77427	-0.80989	-0.596486	-0.286683	-0.498889	-1.06345	-0.239944	-0.46337	-0.305773	-0.655485	-0.420723	-0.0998619	-0.435566	-0.369194	-0.236505	-0.498208	-0.797914	-0.51044	0.690179	-0.616922	0.63939	-0.510765	0.0775081	0.0149417	0.176096	-0.78886	0.302043	-0.301981	-0.121267	-0.146717	0.588151	-0.995331	-0.226738	0.333904	-0.247048	0.476902	0.481519	-0.298931	0.389317	0.0124099	0.0707824	0.193171	0.573379
-4.27353	0.123978	-1.45804	-0.15593	-0.464092	-0.227001	-0.585509	-0.774025	-0.810672	-0.597245	-0.285684	-0.499815	-1.06202	-0.240704	-0.462311	-0.305267	-0.65597	-0.420612	-0.100312	-0.435407	-0.369357	-0.236343	-0.497579	-0.797385	-0.510756	0.692511	-0.617593	0.639275	-0.51048	0.0774571	0.0165032	0.177414	-0.787459	0.301271	-0.300821	-0.120727	-0.14676	0.589467	-0.995489	-0.228096	0.3341	-0.247999	0.477201	0.481804	-0.297397	0.389836	0.0108049	0.0743105	0.193223	0.572838
-4.27255	0.124765	-1.45827	-0.154541	-0.464329	-0.226921	-0.588105	-0.773784	-0.811448	-0.598005	-0.284682	-0.500741	-1.06058	-0.24146	-0.461253	-0.304766	-0.656452	-0.420502	-0.100759	-0.435243	-0.369521	-0.23618	-0.496951	-0.796844	-0.511062	0.694844	-0.618266	0.63916	-0.510186	0.077404	0.0180582	0.178742	-0.786041	0.300483	-0.299655	-0.120179	-0.1468	0.590781	-0.995644	-0.229459	0.334296	-0.248955	0.477493	0.482087	-0.295856	0.390353	0.00921625	0.0778404	0.193273	0.572293
-4.27157	0.12554	-1.45849	-0.153152	-0.46457	-0.226837	-0.590687	-0.773549	-0.812218	-0.598767	-0.283676	-0.501665	-1.05911	-0.242213	-0.460197	-0.304272	-0.656931	-0.420393	-0.101201	-0.435075	-0.369687	-0.236016	-0.496323	-0.796291	-0.511357	0.697178	-0.618941	0.639045	-0.509882	0.0773489	0.0196064	0.180079	-0.784607	0.299678	-0.298483	-0.119625	-0.146837	0.592094	-0.995794	-0.230826	0.334492	-0.249915	0.477777	0.482369	-0.294307	0.390869	0.00764403	0.0813718	0.193318	0.571745
-4.27058	0.126303	-1.45872	-0.151763	-0.464817	-0.226749	-0.593256	-0.773318	-0.812983	-0.599531	-0.282666	-0.502589	-1.05763	-0.242963	-0.459143	-0.303784	-0.657407	-0.420284	-0.10164	-0.434901	-0.369853	-0.23585	-0.495697	-0.795725	-0.511642	0.699513	-0.619617	0.638932	-0.509569	0.0772918	0.0211478	0.181425	-0.783157	0.298856	-0.297306	-0.119065	-0.146872	0.593404	-0.995939	-0.232198	0.334688	-0.250879	0.478053	0.482649	-0.292751	0.391383	0.00608835	0.0849044	0.19336	0.571194
-4.2696	0.127054	-1.45894	-0.150374	-0.465069	-0.226657	-0.595812	-0.773093	-0.813742	-0.600295	-0.281654	-0.503511	-1.05613	-0.243709	-0.458091	-0.303303	-0.657879	-0.420177	-0.102075	-0.434723	-0.370021	-0.235683	-0.495072	-0.795147	-0.511916	0.701848	-0.620294	0.638819	-0.509246	0.0772328	0.022682	0.182781	-0.781691	0.298017	-0.296123	-0.118498	-0.146905	0.594711	-0.99608	-0.233574	0.334884	-0.251847	0.478321	0.482927	-0.291188	0.391896	0.00454934	0.0884381	0.193398	0.570639
-4.26862	0.127793	-1.45917	-0.148984	-0.465326	-0.226562	-0.598354	-0.772873	-0.814495	-0.601062	-0.280638	-0.504433	-1.05461	-0.244453	-0.457041	-0.302827	-0.65835	-0.42007	-0.102506	-0.43454	-0.370191	-0.235514	-0.494447	-0.794557	-0.51218	0.704184	-0.620973	0.638706	-0.508915	0.0771718	0.0242091	0.184147	-0.780209	0.297161	-0.294934	-0.117925	-0.146935	0.596017	-0.996217	-0.234955	0.33508	-0.252819	0.478582	0.483204	-0.289619	0.392407	0.00302709	0.0919725	0.193433	0.57008
-4.26764	0.128519	-1.45939	-0.147595	-0.465588	-0.226462	-0.600883	-0.772657	-0.815243	-0.601829	-0.279619	-0.505354	-1.05307	-0.245193	-0.455992	-0.302357	-0.658817	-0.419965	-0.102933	-0.434352	-0.370361	-0.235345	-0.493825	-0.793954	-0.512433	0.70652	-0.621653	0.638595	-0.508573	0.0771089	0.0257288	0.185523	-0.77871	0.296289	-0.29374	-0.117346	-0.146963	0.59732	-0.99635	-0.23634	0.335277	-0.253795	0.478834	0.483478	-0.288042	0.392917	0.00152172	0.0955074	0.193463	0.569518
-4.26665	0.129234	-1.45961	-0.146206	-0.465855	-0.226359	-0.603398	-0.772447	-0.815985	-0.602598	-0.278596	-0.506274	-1.05152	-0.245931	-0.454945	-0.301893	-0.659281	-0.41986	-0.103356	-0.434159	-0.370533	-0.235174	-0.493203	-0.793339	-0.512675	0.708857	-0.622334	0.638485	-0.508223	0.0770441	0.0272409	0.186908	-0.777195	0.295399	-0.29254	-0.11676	-0.146988	0.59862	-0.996478	-0.23773	0.335474	-0.254775	0.479079	0.483751	-0.286458	0.393424	3.33211e-05	0.0990425	0.19349	0.568952
-4.26567	0.129936	-1.45984	-0.144817	-0.466126	-0.226253	-0.605898	-0.772242	-0.816721	-0.603367	-0.277571	-0.507193	-1.04994	-0.246665	-0.4539	-0.301436	-0.659743	-0.419757	-0.103775	-0.433962	-0.370705	-0.235002	-0.492584	-0.792713	-0.512907	0.711193	-0.623016	0.638375	-0.507863	0.0769774	0.0287454	0.188303	-0.775663	0.294493	-0.291335	-0.116169	-0.14701	0.599919	-0.996601	-0.239123	0.335672	-0.255758	0.479315	0.484021	-0.284868	0.39393	-0.001438	0.102578	0.193514	0.568384
-4.26469	0.130626	-1.46006	-0.143428	-0.466402	-0.226142	-0.608385	-0.772042	-0.817452	-0.604138	-0.276543	-0.508111	-1.04835	-0.247396	-0.452857	-0.300984	-0.660201	-0.419656	-0.104189	-0.43376	-0.370879	-0.234829	-0.491965	-0.792074	-0.513129	0.713529	-0.6237	0.638267	-0.507494	0.0769089	0.0302421	0.189708	-0.774115	0.29357	-0.290124	-0.115571	-0.147029	0.601214	-0.99672	-0.240519	0.33587	-0.256744	0.479544	0.484289	-0.283272	0.394434	-0.00289215	0.106113	0.193533	0.567811
-4.2637	0.131303	-1.46028	-0.142039	-0.466683	-0.226028	-0.610857	-0.771847	-0.818177	-0.604909	-0.275511	-0.509029	-1.04673	-0.248124	-0.451816	-0.300538	-0.660657	-0.419555	-0.1046	-0.433554	-0.371054	-0.234655	-0.491349	-0.791423	-0.51334	0.715864	-0.624384	0.638159	-0.507116	0.0768385	0.0317308	0.191122	-0.77255	0.292631	-0.288908	-0.114968	-0.147045	0.602507	-0.996834	-0.24192	0.336068	-0.257734	0.479764	0.484554	-0.281669	0.394936	-0.00432902	0.109647	0.193549	0.567236
-4.26272	0.131967	-1.4605	-0.14065	-0.466968	-0.22591	-0.613315	-0.771657	-0.818896	-0.605681	-0.274477	-0.509946	-1.0451	-0.248849	-0.450777	-0.300099	-0.66111	-0.419456	-0.105005	-0.433343	-0.371231	-0.23448	-0.490734	-0.79076	-0.51354	0.718199	-0.625069	0.638053	-0.506729	0.0767664	0.0332114	0.192546	-0.770969	0.291674	-0.287686	-0.114359	-0.147059	0.603796	-0.996944	-0.243324	0.336268	-0.258727	0.479976	0.484817	-0.280059	0.395436	-0.00574853	0.113181	0.193561	0.566657
-4.26174	0.132619	-1.46072	-0.139262	-0.467258	-0.225788	-0.615758	-0.771472	-0.819609	-0.606454	-0.273439	-0.510862	-1.04345	-0.249571	-0.44974	-0.299665	-0.661561	-0.419358	-0.105406	-0.433127	-0.371408	-0.234305	-0.490121	-0.790085	-0.513729	0.720532	-0.625756	0.637948	-0.506332	0.0766924	0.0346837	0.193981	-0.769371	0.290701	-0.28646	-0.113744	-0.147069	0.605083	-0.997049	-0.244731	0.336468	-0.259723	0.480181	0.485078	-0.278444	0.395934	-0.00715057	0.116713	0.193569	0.566075
-4.26075	0.133258	-1.46094	-0.137873	-0.467552	-0.225662	-0.618186	-0.771293	-0.820317	-0.607227	-0.272399	-0.511777	-1.04178	-0.250289	-0.448704	-0.299237	-0.662008	-0.419262	-0.105803	-0.432907	-0.371587	-0.234128	-0.48951	-0.789399	-0.513908	0.722864	-0.626443	0.637844	-0.505927	0.0766166	0.0361476	0.195424	-0.767757	0.289711	-0.285228	-0.113124	-0.147076	0.606367	-0.99715	-0.246142	0.336669	-0.260722	0.480376	0.485336	-0.276822	0.39643	-0.00853505	0.120245	0.193573	0.56549
-4.25977	0.133884	-1.46116	-0.136485	-0.467851	-0.225533	-0.6206	-0.771118	-0.821019	-0.608001	-0.271356	-0.512692	-1.04009	-0.251005	-0.447671	-0.298815	-0.662453	-0.419167	-0.106195	-0.432683	-0.371766	-0.233951	-0.488901	-0.7887	-0.514076	0.725195	-0.62713	0.637741	-0.505512	0.0765391	0.0376029	0.196878	-0.766127	0.288704	-0.283991	-0.112499	-0.14708	0.607648	-0.997245	-0.247555	0.33687	-0.261723	0.480564	0.485591	-0.275194	0.396923	-0.00990189	0.123774	0.193574	0.564901
-4.25879	0.134497	-1.46138	-0.135097	-0.468153	-0.2254	-0.622998	-0.770949	-0.821715	-0.608776	-0.270311	-0.513606	-1.03838	-0.251718	-0.44664	-0.298399	-0.662895	-0.419073	-0.106582	-0.432454	-0.371947	-0.233773	-0.488294	-0.78799	-0.514234	0.727525	-0.627819	0.63764	-0.505089	0.0764599	0.0390496	0.198342	-0.76448	0.28768	-0.282748	-0.111868	-0.147081	0.608926	-0.997336	-0.248972	0.337073	-0.262728	0.480743	0.485844	-0.273561	0.397413	-0.011251	0.127303	0.193571	0.56431
-4.2578	0.135097	-1.4616	-0.13371	-0.46846	-0.225263	-0.625381	-0.770784	-0.822405	-0.60955	-0.269262	-0.514519	-1.03665	-0.252427	-0.44561	-0.297989	-0.663335	-0.418981	-0.106965	-0.432221	-0.372129	-0.233594	-0.48769	-0.787269	-0.514381	0.729852	-0.628508	0.637539	-0.504656	0.0763789	0.0404874	0.199815	-0.762816	0.28664	-0.281501	-0.111233	-0.147079	0.6102	-0.997423	-0.250391	0.337277	-0.263734	0.480915	0.486093	-0.271922	0.397901	-0.0125823	0.130829	0.193564	0.563715
-4.25682	0.135684	-1.46182	-0.132323	-0.468771	-0.225123	-0.627749	-0.770625	-0.82309	-0.610325	-0.268211	-0.515431	-1.03491	-0.253134	-0.444583	-0.297584	-0.663772	-0.418891	-0.107342	-0.431984	-0.372312	-0.233414	-0.487087	-0.786536	-0.514517	0.732178	-0.629198	0.63744	-0.504215	0.0762962	0.0419162	0.201299	-0.761136	0.285583	-0.280249	-0.110592	-0.147073	0.611471	-0.997504	-0.251813	0.337482	-0.264744	0.481077	0.48634	-0.270277	0.398387	-0.0138957	0.134353	0.193554	0.563117
-4.25584	0.136257	-1.46203	-0.130936	-0.469086	-0.224979	-0.630102	-0.770471	-0.823768	-0.6111	-0.267157	-0.516343	-1.03314	-0.253838	-0.443557	-0.297186	-0.664206	-0.418802	-0.107715	-0.431742	-0.372496	-0.233234	-0.486487	-0.785791	-0.514643	0.734501	-0.629888	0.637343	-0.503764	0.0762119	0.043336	0.202792	-0.759439	0.284509	-0.278991	-0.109946	-0.147064	0.612738	-0.997581	-0.253237	0.337688	-0.265755	0.481232	0.486583	-0.268626	0.39887	-0.0151911	0.137874	0.193539	0.562517
-4.25486	0.136817	-1.46225	-0.12955	-0.469404	-0.224831	-0.632438	-0.770323	-0.824441	-0.611875	-0.266101	-0.517255	-1.03136	-0.254538	-0.442534	-0.296793	-0.664638	-0.418715	-0.108083	-0.431496	-0.372681	-0.233054	-0.48589	-0.785035	-0.514758	0.736822	-0.630579	0.637247	-0.503305	0.0761258	0.0447465	0.204296	-0.757725	0.283419	-0.277729	-0.109295	-0.147051	0.614002	-0.997653	-0.254663	0.337896	-0.266768	0.481378	0.486824	-0.266971	0.399349	-0.0164684	0.141393	0.193521	0.561913
-4.25387	0.137364	-1.46247	-0.128164	-0.469727	-0.224679	-0.634759	-0.770179	-0.825108	-0.61265	-0.265042	-0.518165	-1.02956	-0.255236	-0.441513	-0.296406	-0.665067	-0.41863	-0.108445	-0.431246	-0.372868	-0.232872	-0.485295	-0.784268	-0.514862	0.739141	-0.63127	0.637152	-0.502837	0.0760381	0.0461477	0.205809	-0.755995	0.282312	-0.276462	-0.10864	-0.147035	0.615263	-0.99772	-0.256092	0.338105	-0.267784	0.481516	0.487061	-0.26531	0.399826	-0.0177276	0.144909	0.193499	0.561306
-4.25289	0.137897	-1.46268	-0.126779	-0.470053	-0.224524	-0.637064	-0.770041	-0.825769	-0.613425	-0.263981	-0.519076	-1.02773	-0.255931	-0.440494	-0.296024	-0.665494	-0.418546	-0.108803	-0.430992	-0.373055	-0.232691	-0.484703	-0.78349	-0.514956	0.741456	-0.631961	0.637059	-0.502361	0.0759488	0.0475393	0.207332	-0.754249	0.281189	-0.27519	-0.10798	-0.147015	0.616519	-0.997782	-0.257523	0.338315	-0.268801	0.481645	0.487295	-0.263643	0.400301	-0.0189685	0.148421	0.193474	0.560697
-4.25191	0.138417	-1.4629	-0.125394	-0.470383	-0.224365	-0.639353	-0.769908	-0.826424	-0.614199	-0.262917	-0.519985	-1.02589	-0.256622	-0.439477	-0.295648	-0.665918	-0.418465	-0.109155	-0.430733	-0.373243	-0.232509	-0.484113	-0.7827	-0.515039	0.743769	-0.632653	0.636967	-0.501876	0.0758578	0.0489213	0.208865	-0.752486	0.280049	-0.273914	-0.107316	-0.146991	0.617772	-0.997839	-0.258955	0.338527	-0.26982	0.481766	0.487525	-0.261972	0.400772	-0.0201912	0.151931	0.193445	0.560085
-4.25092	0.138923	-1.46312	-0.12401	-0.470717	-0.224202	-0.641626	-0.76978	-0.827073	-0.614974	-0.261851	-0.520894	-1.02403	-0.257311	-0.438461	-0.295278	-0.666339	-0.418385	-0.109502	-0.430471	-0.373433	-0.232327	-0.483526	-0.7819	-0.515111	0.746078	-0.633345	0.636877	-0.501382	0.0757652	0.0502936	0.210408	-0.750706	0.278893	-0.272633	-0.106647	-0.146964	0.619021	-0.997891	-0.260389	0.338741	-0.270841	0.481878	0.487752	-0.260296	0.401239	-0.0213955	0.155436	0.193412	0.55947
-4.24994	0.139415	-1.46333	-0.122626	-0.471054	-0.224035	-0.643883	-0.769657	-0.827716	-0.615748	-0.260782	-0.521803	-1.02215	-0.257997	-0.437449	-0.294914	-0.666758	-0.418307	-0.109844	-0.430205	-0.373623	-0.232144	-0.482942	-0.781088	-0.515173	0.748384	-0.634037	0.636789	-0.50088	0.075671	0.051656	0.211961	-0.74891	0.27772	-0.271347	-0.105974	-0.146933	0.620265	-0.997938	-0.261825	0.338956	-0.271863	0.481982	0.487975	-0.258615	0.401704	-0.0225813	0.158938	0.193375	0.558852
-4.24896	0.139893	-1.46355	-0.121243	-0.471394	-0.223865	-0.646124	-0.769539	-0.828353	-0.616521	-0.259711	-0.522711	-1.02026	-0.25868	-0.436438	-0.294555	-0.667174	-0.418231	-0.11018	-0.429935	-0.373815	-0.231961	-0.482361	-0.780265	-0.515225	0.750686	-0.634728	0.636702	-0.500369	0.0755752	0.0530084	0.213524	-0.747097	0.276531	-0.270057	-0.105297	-0.146897	0.621506	-0.99798	-0.263262	0.339174	-0.272886	0.482078	0.488195	-0.256929	0.402165	-0.0237487	0.162436	0.193335	0.558232
-4.24797	0.140358	-1.46376	-0.119861	-0.471738	-0.223692	-0.648348	-0.769427	-0.828985	-0.617294	-0.258638	-0.523618	-1.01834	-0.25936	-0.435429	-0.294201	-0.667588	-0.418157	-0.110511	-0.42966	-0.374008	-0.231778	-0.481783	-0.779432	-0.515266	0.752985	-0.63542	0.636617	-0.49985	0.0754778	0.0543507	0.215096	-0.745268	0.275326	-0.268762	-0.104616	-0.146858	0.622742	-0.998017	-0.2647	0.339393	-0.273911	0.482165	0.48841	-0.255239	0.402623	-0.0248975	0.165929	0.193291	0.557609
-4.24699	0.140808	-1.46398	-0.11848	-0.472085	-0.223514	-0.650555	-0.76932	-0.82961	-0.618067	-0.257563	-0.524525	-1.0164	-0.260037	-0.434422	-0.293853	-0.668	-0.418085	-0.110837	-0.429382	-0.374202	-0.231595	-0.481208	-0.778588	-0.515296	0.755279	-0.636112	0.636534	-0.499322	0.0753788	0.0556828	0.216679	-0.743422	0.274104	-0.267462	-0.103931	-0.146815	0.623975	-0.998049	-0.26614	0.339614	-0.274936	0.482243	0.488622	-0.253545	0.403077	-0.0260276	0.169418	0.193243	0.556983
-4.24601	0.141245	-1.46419	-0.117099	-0.472435	-0.223334	-0.652746	-0.769218	-0.83023	-0.618839	-0.256486	-0.525432	-1.01445	-0.260711	-0.433418	-0.293511	-0.668409	-0.418015	-0.111157	-0.429101	-0.374396	-0.231412	-0.480637	-0.777733	-0.515316	0.757569	-0.636803	0.636453	-0.498786	0.0752784	0.0570045	0.218272	-0.74156	0.272867	-0.266159	-0.103243	-0.146768	0.625202	-0.998076	-0.26758	0.339837	-0.275963	0.482313	0.48883	-0.251846	0.403528	-0.0271391	0.172902	0.193192	0.556355
-4.24503	0.141667	-1.46441	-0.115719	-0.472788	-0.223149	-0.65492	-0.769121	-0.830843	-0.61961	-0.255407	-0.526338	-1.01247	-0.261382	-0.432415	-0.293174	-0.668815	-0.417947	-0.111471	-0.428815	-0.374592	-0.231229	-0.480068	-0.776867	-0.515325	0.759855	-0.637495	0.636373	-0.498242	0.0751763	0.0583157	0.219874	-0.739681	0.271613	-0.264851	-0.10255	-0.146717	0.626426	-0.998098	-0.269021	0.340062	-0.27699	0.482374	0.489035	-0.250142	0.403975	-0.0282317	0.176381	0.193137	0.555725
-4.24404	0.142076	-1.46462	-0.11434	-0.473144	-0.222961	-0.657077	-0.769029	-0.831451	-0.62038	-0.254326	-0.527243	-1.01048	-0.262051	-0.431415	-0.292843	-0.66922	-0.417882	-0.111779	-0.428526	-0.374789	-0.231045	-0.479503	-0.775991	-0.515324	0.762136	-0.638186	0.636295	-0.49769	0.0750727	0.0596164	0.221486	-0.737785	0.270343	-0.263538	-0.101855	-0.146662	0.627645	-0.998115	-0.270463	0.340289	-0.278018	0.482427	0.489234	-0.248435	0.404418	-0.0293056	0.179855	0.193078	0.555092
-4.24306	0.14247	-1.46484	-0.112962	-0.473503	-0.222769	-0.659217	-0.768943	-0.832053	-0.62115	-0.253242	-0.528149	-1.00847	-0.262716	-0.430417	-0.292517	-0.669622	-0.417818	-0.112082	-0.428233	-0.374987	-0.230862	-0.478942	-0.775105	-0.515313	0.764412	-0.638876	0.636219	-0.49713	0.0749676	0.0609063	0.223109	-0.735874	0.269057	-0.262222	-0.101155	-0.146602	0.628859	-0.998126	-0.271906	0.340518	-0.279046	0.482471	0.48943	-0.246724	0.404858	-0.0303606	0.183323	0.193016	0.554457
-4.24208	0.14285	-1.46505	-0.111585	-0.473865	-0.222574	-0.66134	-0.768862	-0.832648	-0.621918	-0.252157	-0.529053	-1.00644	-0.263379	-0.429421	-0.292196	-0.670021	-0.417757	-0.112379	-0.427936	-0.375186	-0.230679	-0.478384	-0.774208	-0.515291	0.766684	-0.639566	0.636145	-0.496561	0.074861	0.0621855	0.224741	-0.733945	0.267755	-0.260901	-0.100453	-0.146538	0.630068	-0.998132	-0.273348	0.34075	-0.280075	0.482507	0.489622	-0.245009	0.405293	-0.0313967	0.186786	0.19295	0.553819
-4.24109	0.143215	-1.46527	-0.110209	-0.47423	-0.222375	-0.663445	-0.768786	-0.833238	-0.622686	-0.25107	-0.529957	-1.00439	-0.264038	-0.428427	-0.291881	-0.670418	-0.417698	-0.11267	-0.427636	-0.375386	-0.230496	-0.477829	-0.773301	-0.515258	0.768949	-0.640255	0.636073	-0.495985	0.0747529	0.0634538	0.226383	-0.732001	0.266437	-0.259577	-0.0997474	-0.146469	0.631273	-0.998133	-0.274791	0.340985	-0.281104	0.482534	0.489809	-0.24329	0.405724	-0.0324138	0.190243	0.192881	0.553179
-4.24011	0.143566	-1.46548	-0.108834	-0.474598	-0.222173	-0.665534	-0.768715	-0.833821	-0.623452	-0.249981	-0.530861	-1.00232	-0.264695	-0.427436	-0.29157	-0.670813	-0.417642	-0.112955	-0.427332	-0.375588	-0.230313	-0.477278	-0.772384	-0.515216	0.77121	-0.640944	0.636003	-0.495401	0.0746433	0.0647111	0.228034	-0.73004	0.265104	-0.258248	-0.0990387	-0.146396	0.632473	-0.998129	-0.276234	0.341221	-0.282133	0.482552	0.489992	-0.241568	0.406151	-0.0334118	0.193694	0.192808	0.552538
-4.23913	0.143903	-1.4657	-0.10746	-0.474968	-0.221967	-0.667605	-0.76865	-0.834399	-0.624217	-0.248891	-0.531765	-1.00024	-0.265349	-0.426446	-0.291266	-0.671205	-0.417587	-0.113234	-0.427025	-0.37579	-0.23013	-0.476731	-0.771457	-0.515162	0.773465	-0.641632	0.635935	-0.494809	0.0745322	0.0659572	0.229696	-0.728062	0.263754	-0.256915	-0.0983272	-0.146319	0.633667	-0.998119	-0.277677	0.34146	-0.283163	0.482562	0.49017	-0.239842	0.406574	-0.0343908	0.197138	0.192732	0.551894
-4.23814	0.144225	-1.46591	-0.106087	-0.47534	-0.221758	-0.669659	-0.768589	-0.83497	-0.624981	-0.247799	-0.532668	-0.998131	-0.266	-0.425459	-0.290966	-0.671595	-0.417535	-0.113507	-0.426714	-0.375993	-0.229948	-0.476188	-0.770519	-0.515099	0.775714	-0.642319	0.63587	-0.49421	0.0744196	0.0671922	0.231367	-0.726069	0.262389	-0.255579	-0.0976129	-0.146237	0.634857	-0.998104	-0.279119	0.341702	-0.284192	0.482563	0.490344	-0.238113	0.406993	-0.0353507	0.200576	0.192652	0.551248
-4.23716	0.144533	-1.46613	-0.104715	-0.475715	-0.221545	-0.671695	-0.768534	-0.835536	-0.625743	-0.246705	-0.53357	-0.996007	-0.266649	-0.424474	-0.290672	-0.671983	-0.417486	-0.113774	-0.4264	-0.376198	-0.229766	-0.475649	-0.769572	-0.515026	0.777957	-0.643005	0.635806	-0.493602	0.0743056	0.0684158	0.233048	-0.724059	0.261009	-0.254238	-0.0968959	-0.14615	0.636042	-0.998084	-0.280561	0.341947	-0.285221	0.482556	0.490513	-0.236381	0.407407	-0.0362914	0.204008	0.192568	0.5506
-4.23618	0.144825	-1.46634	-0.103344	-0.476093	-0.221329	-0.673713	-0.768484	-0.836095	-0.626505	-0.245609	-0.534472	-0.993864	-0.267294	-0.423491	-0.290383	-0.672368	-0.417439	-0.114034	-0.426082	-0.376403	-0.229585	-0.475113	-0.768615	-0.514942	0.780193	-0.643691	0.635744	-0.492987	0.07419	0.0696281	0.234739	-0.722032	0.259613	-0.252894	-0.0961764	-0.146059	0.637221	-0.998058	-0.282002	0.342194	-0.286249	0.482539	0.490678	-0.234646	0.407817	-0.0372129	0.207432	0.192481	0.54995
-4.23519	0.145104	-1.46655	-0.101975	-0.476472	-0.221109	-0.675714	-0.76844	-0.836649	-0.627264	-0.244512	-0.535374	-0.991702	-0.267937	-0.42251	-0.290099	-0.672752	-0.417395	-0.114289	-0.425761	-0.376609	-0.229403	-0.474581	-0.767648	-0.514848	0.782423	-0.644375	0.635685	-0.492365	0.0740731	0.0708288	0.236439	-0.71999	0.258201	-0.251546	-0.0954545	-0.145963	0.638395	-0.998027	-0.283443	0.342444	-0.287277	0.482515	0.490837	-0.232908	0.408222	-0.0381152	0.210849	0.192391	0.549298
-4.23421	0.145367	-1.46677	-0.100607	-0.476854	-0.220886	-0.677697	-0.7684	-0.837196	-0.628023	-0.243414	-0.536275	-0.989522	-0.268577	-0.421532	-0.28982	-0.673133	-0.417353	-0.114537	-0.425437	-0.376817	-0.229223	-0.474054	-0.766672	-0.514744	0.784647	-0.645058	0.635628	-0.491735	0.0739546	0.072018	0.238149	-0.717931	0.256774	-0.250195	-0.0947304	-0.145862	0.639563	-0.997991	-0.284883	0.342697	-0.288304	0.482481	0.490992	-0.231167	0.408622	-0.0389982	0.214259	0.192298	0.548644
-4.23323	0.145616	-1.46698	-0.0992404	-0.477238	-0.22066	-0.679663	-0.768366	-0.837737	-0.628779	-0.242314	-0.537176	-0.987323	-0.269214	-0.420556	-0.289546	-0.673511	-0.417313	-0.114779	-0.42511	-0.377026	-0.229043	-0.473531	-0.765686	-0.514629	0.786864	-0.64574	0.635573	-0.491098	0.0738348	0.0731955	0.239869	-0.715857	0.255332	-0.24884	-0.0940041	-0.145756	0.640726	-0.997949	-0.286322	0.342953	-0.289331	0.482439	0.491142	-0.229423	0.409018	-0.0398619	0.217661	0.192201	0.547989
-4.23225	0.14585	-1.4672	-0.0978752	-0.477624	-0.22043	-0.68161	-0.768336	-0.838272	-0.629535	-0.241213	-0.538077	-0.985106	-0.269848	-0.419582	-0.289277	-0.673888	-0.417277	-0.115014	-0.42478	-0.377235	-0.228863	-0.473011	-0.76469	-0.514505	0.789073	-0.64642	0.63552	-0.490454	0.0737134	0.0743613	0.241598	-0.713766	0.253875	-0.247481	-0.0932757	-0.145645	0.641884	-0.997901	-0.287759	0.343213	-0.290356	0.482389	0.491287	-0.227677	0.409409	-0.0407062	0.221056	0.1921	0.547332
-4.23126	0.146069	-1.46741	-0.0965114	-0.478012	-0.220197	-0.683539	-0.768312	-0.838801	-0.630288	-0.24011	-0.538977	-0.98287	-0.270479	-0.41861	-0.289013	-0.674262	-0.417243	-0.115243	-0.424446	-0.377446	-0.228684	-0.472497	-0.763685	-0.514371	0.791276	-0.647099	0.635469	-0.489803	0.0735907	0.0755152	0.243337	-0.711659	0.252403	-0.246119	-0.0925455	-0.145529	0.643036	-0.997849	-0.289196	0.343475	-0.291381	0.482329	0.491426	-0.225928	0.409794	-0.0415312	0.224442	0.191997	0.546674
-4.23028	0.146274	-1.46763	-0.095149	-0.478402	-0.219961	-0.68545	-0.768294	-0.839324	-0.63104	-0.239006	-0.539877	-0.980616	-0.271108	-0.41764	-0.288754	-0.674634	-0.417211	-0.115466	-0.424109	-0.377658	-0.228506	-0.471986	-0.762671	-0.514227	0.793471	-0.647777	0.635421	-0.489144	0.0734665	0.0766572	0.245085	-0.709536	0.250916	-0.244753	-0.0918135	-0.145408	0.644182	-0.99779	-0.290631	0.34374	-0.292404	0.482261	0.491561	-0.224178	0.410175	-0.0423368	0.227821	0.19189	0.546014
-4.2293	0.146463	-1.46784	-0.0937882	-0.478793	-0.219721	-0.687343	-0.76828	-0.839841	-0.631789	-0.237901	-0.540776	-0.978343	-0.271733	-0.416673	-0.2885	-0.675004	-0.417183	-0.115681	-0.42377	-0.377871	-0.228328	-0.47148	-0.761648	-0.514072	0.795658	-0.648453	0.635376	-0.488479	0.0733408	0.0777871	0.246843	-0.707398	0.249414	-0.243385	-0.0910798	-0.145282	0.645322	-0.997726	-0.292064	0.344009	-0.293426	0.482185	0.491691	-0.222425	0.410551	-0.0431229	0.231191	0.191779	0.545352
-4.22831	0.146637	-1.46806	-0.092429	-0.479186	-0.219478	-0.689218	-0.768271	-0.840352	-0.632537	-0.236795	-0.541675	-0.976052	-0.272356	-0.415707	-0.288251	-0.675371	-0.417157	-0.115891	-0.423427	-0.378085	-0.228151	-0.470978	-0.760615	-0.513908	0.797838	-0.649127	0.635332	-0.487806	0.0732138	0.078905	0.24861	-0.705243	0.247898	-0.242012	-0.0903446	-0.145151	0.646456	-0.997657	-0.293495	0.344281	-0.294447	0.4821	0.491815	-0.22067	0.410921	-0.0438897	0.234552	0.191666	0.544689
-4.22733	0.146796	-1.46827	-0.0910714	-0.479581	-0.219232	-0.691075	-0.768268	-0.840857	-0.633283	-0.235688	-0.542574	-0.973742	-0.272977	-0.414744	-0.288007	-0.675737	-0.417134	-0.116093	-0.423081	-0.3783	-0.227975	-0.470481	-0.759574	-0.513735	0.80001	-0.6498	0.635291	-0.487127	0.0730853	0.0800108	0.250387	-0.703073	0.246366	-0.240637	-0.0896081	-0.145015	0.647584	-0.997582	-0.294925	0.344556	-0.295466	0.482006	0.491933	-0.218913	0.411286	-0.0446369	0.237905	0.191549	0.544025
-4.22635	0.146941	-1.46848	-0.0897154	-0.479978	-0.218982	-0.692913	-0.768269	-0.841355	-0.634027	-0.23458	-0.543472	-0.971415	-0.273594	-0.413783	-0.287768	-0.6761	-0.417113	-0.116289	-0.422733	-0.378516	-0.2278	-0.469988	-0.758523	-0.513551	0.802173	-0.650471	0.635253	-0.486441	0.0729554	0.0811043	0.252172	-0.700887	0.24482	-0.239259	-0.0888703	-0.144873	0.648706	-0.997501	-0.296352	0.344835	-0.296484	0.481904	0.492047	-0.217154	0.411645	-0.0453647	0.241249	0.191429	0.54336
-4.22536	0.14707	-1.4687	-0.0883612	-0.480376	-0.21873	-0.694733	-0.768276	-0.841848	-0.634769	-0.23347	-0.54437	-0.969069	-0.274209	-0.412825	-0.287533	-0.676461	-0.417096	-0.116478	-0.422381	-0.378734	-0.227625	-0.4695	-0.757464	-0.513358	0.804328	-0.65114	0.635217	-0.485748	0.072824	0.0821855	0.253968	-0.698685	0.24326	-0.237877	-0.0881313	-0.144726	0.649822	-0.997415	-0.297777	0.345117	-0.297499	0.481793	0.492155	-0.215394	0.411999	-0.046073	0.244584	0.191306	0.542693
-4.22438	0.147184	-1.46891	-0.0870088	-0.480775	-0.218474	-0.696535	-0.768288	-0.842334	-0.635509	-0.23236	-0.545267	-0.966705	-0.27482	-0.411868	-0.287303	-0.67682	-0.417081	-0.11666	-0.422027	-0.378952	-0.227452	-0.469017	-0.756396	-0.513155	0.806475	-0.651807	0.635184	-0.485049	0.0726913	0.0832544	0.255772	-0.696467	0.241685	-0.236493	-0.0873913	-0.144574	0.650932	-0.997323	-0.2992	0.345403	-0.298513	0.481673	0.492257	-0.213633	0.412348	-0.0467617	0.24791	0.19118	0.542026
-4.2234	0.147282	-1.46913	-0.0856582	-0.481176	-0.218215	-0.698318	-0.768305	-0.842814	-0.636247	-0.231249	-0.546164	-0.964323	-0.275429	-0.410914	-0.287078	-0.677177	-0.41707	-0.116836	-0.42167	-0.379172	-0.227279	-0.468538	-0.755319	-0.512942	0.808613	-0.652472	0.635153	-0.484344	0.0725571	0.0843108	0.257586	-0.694234	0.240097	-0.235105	-0.0866505	-0.144416	0.652036	-0.997225	-0.30062	0.345692	-0.299525	0.481545	0.492354	-0.21187	0.412691	-0.0474309	0.251226	0.191051	0.541357
-4.22242	0.147366	-1.46934	-0.0843095	-0.481578	-0.217953	-0.700083	-0.768327	-0.843288	-0.636982	-0.230137	-0.547061	-0.961923	-0.276036	-0.409962	-0.286857	-0.677532	-0.417061	-0.117004	-0.42131	-0.379392	-0.227108	-0.468065	-0.754234	-0.51272	0.810741	-0.653134	0.635125	-0.483632	0.0724215	0.0853547	0.259408	-0.691986	0.238494	-0.233715	-0.0859089	-0.144252	0.653133	-0.997122	-0.302038	0.345985	-0.300534	0.481409	0.492445	-0.210106	0.413027	-0.0480806	0.254533	0.190919	0.540687
-4.22143	0.147434	-1.46956	-0.0829627	-0.481981	-0.217687	-0.701829	-0.768354	-0.843756	-0.637716	-0.229024	-0.547957	-0.959504	-0.276639	-0.409012	-0.286641	-0.677884	-0.417055	-0.117166	-0.420948	-0.379614	-0.226937	-0.467596	-0.753141	-0.512488	0.812861	-0.653795	0.635099	-0.482913	0.0722845	0.0863861	0.26124	-0.689722	0.236877	-0.232322	-0.0851667	-0.144084	0.654223	-0.997013	-0.303453	0.346282	-0.301542	0.481264	0.49253	-0.20834	0.413359	-0.0487108	0.257829	0.190784	0.540017
-4.22045	0.147488	-1.46977	-0.0816178	-0.482385	-0.217419	-0.703556	-0.768386	-0.844218	-0.638447	-0.227911	-0.548853	-0.957068	-0.27724	-0.408065	-0.28643	-0.678235	-0.417052	-0.117321	-0.420583	-0.379837	-0.226768	-0.467132	-0.752039	-0.512247	0.814972	-0.654453	0.635076	-0.482189	0.0721461	0.0874048	0.263081	-0.687442	0.235246	-0.230926	-0.084424	-0.143909	0.655307	-0.996899	-0.304865	0.346582	-0.302547	0.48111	0.492609	-0.206574	0.413684	-0.0493214	0.261116	0.190646	0.539345
-4.21947	0.147525	-1.46999	-0.080275	-0.48279	-0.217148	-0.705265	-0.768423	-0.844673	-0.639175	-0.226797	-0.549748	-0.954615	-0.277838	-0.40712	-0.286223	-0.678583	-0.417053	-0.117468	-0.420215	-0.380061	-0.226599	-0.466673	-0.750929	-0.511997	0.817073	-0.655108	0.635056	-0.481459	0.0720062	0.0884109	0.264931	-0.685148	0.233602	-0.229528	-0.0836809	-0.143729	0.656384	-0.996778	-0.306274	0.346887	-0.303549	0.480948	0.492683	-0.204807	0.414003	-0.0499125	0.264393	0.190505	0.538673
-4.21848	0.147548	-1.47021	-0.0789342	-0.483196	-0.216874	-0.706955	-0.768465	-0.845123	-0.639901	-0.225682	-0.550643	-0.952143	-0.278433	-0.406176	-0.286021	-0.67893	-0.417056	-0.117609	-0.419845	-0.380286	-0.226432	-0.466219	-0.74981	-0.511737	0.819164	-0.655761	0.635038	-0.480722	0.0718649	0.0894043	0.266789	-0.682838	0.231944	-0.228126	-0.0829376	-0.143543	0.657455	-0.996652	-0.307679	0.347195	-0.304548	0.480778	0.49275	-0.20304	0.414316	-0.050484	0.267659	0.190361	0.538001
-4.2175	0.147555	-1.47042	-0.0775956	-0.483603	-0.216596	-0.708626	-0.768512	-0.845566	-0.640625	-0.224567	-0.551537	-0.949654	-0.279025	-0.405236	-0.285823	-0.679274	-0.417063	-0.117742	-0.419472	-0.380513	-0.226266	-0.46577	-0.748684	-0.511468	0.821246	-0.656412	0.635024	-0.47998	0.0717222	0.0903849	0.268657	-0.680513	0.230272	-0.226723	-0.0821942	-0.143351	0.658519	-0.996521	-0.309081	0.347508	-0.305545	0.480599	0.492812	-0.201272	0.414622	-0.051036	0.270915	0.190214	0.537328
-4.21652	0.147547	-1.47064	-0.0762592	-0.48401	-0.216316	-0.710279	-0.768565	-0.846003	-0.641346	-0.223451	-0.552431	-0.947147	-0.279615	-0.404297	-0.28563	-0.679616	-0.417072	-0.117868	-0.419097	-0.38074	-0.226102	-0.465326	-0.74755	-0.51119	0.823317	-0.65706	0.635011	-0.479232	0.0715781	0.0913526	0.270533	-0.678173	0.228588	-0.225317	-0.0814508	-0.143154	0.659576	-0.996383	-0.31048	0.347824	-0.306539	0.480412	0.492868	-0.199503	0.414923	-0.0515684	0.27416	0.190064	0.536654
-4.21553	0.147523	-1.47085	-0.074925	-0.484419	-0.216033	-0.711913	-0.768622	-0.846434	-0.642065	-0.222335	-0.553324	-0.944622	-0.280202	-0.40336	-0.285441	-0.679956	-0.417085	-0.117987	-0.41872	-0.380969	-0.225938	-0.464887	-0.746408	-0.510903	0.825378	-0.657704	0.635002	-0.478478	0.0714326	0.0923075	0.272418	-0.675818	0.22689	-0.223908	-0.0807075	-0.142951	0.660626	-0.99624	-0.311875	0.348144	-0.30753	0.480216	0.492917	-0.197735	0.415216	-0.0520813	0.277394	0.189912	0.53598
-4.21455	0.147484	-1.47107	-0.073593	-0.484827	-0.215747	-0.713528	-0.768684	-0.846859	-0.642781	-0.221219	-0.554217	-0.94208	-0.280786	-0.402426	-0.285256	-0.680294	-0.417101	-0.118099	-0.41834	-0.381199	-0.225776	-0.464454	-0.745258	-0.510607	0.827429	-0.658346	0.634996	-0.477719	0.0712856	0.0932495	0.274311	-0.673448	0.225179	-0.222497	-0.0799645	-0.142741	0.661669	-0.996091	-0.313266	0.348469	-0.308518	0.480012	0.492961	-0.195966	0.415504	-0.0525747	0.280617	0.189757	0.535305
-4.21357	0.14743	-1.47128	-0.0722634	-0.485237	-0.215458	-0.715124	-0.768751	-0.847277	-0.643495	-0.220102	-0.555109	-0.939521	-0.281367	-0.401494	-0.285076	-0.68063	-0.417121	-0.118204	-0.417958	-0.38143	-0.225615	-0.464025	-0.7441	-0.510302	0.82947	-0.658985	0.634992	-0.476954	0.0711372	0.0941785	0.276214	-0.671063	0.223455	-0.221084	-0.0792219	-0.142526	0.662704	-0.995936	-0.314653	0.348797	-0.309503	0.4798	0.492998	-0.194197	0.415785	-0.0530486	0.283829	0.189599	0.534631
-4.21258	0.14736	-1.4715	-0.0709362	-0.485647	-0.215167	-0.716702	-0.768823	-0.847689	-0.644206	-0.218985	-0.556001	-0.936944	-0.281946	-0.400564	-0.284899	-0.680964	-0.417143	-0.118301	-0.417573	-0.381662	-0.225455	-0.463603	-0.742935	-0.509988	0.8315	-0.659621	0.634991	-0.476184	0.0709873	0.0950945	0.278124	-0.668664	0.221718	-0.219668	-0.0784799	-0.142305	0.663733	-0.995776	-0.316036	0.34913	-0.310484	0.479579	0.493028	-0.192429	0.416059	-0.0535029	0.28703	0.189439	0.533956
-4.2116	0.147275	-1.47172	-0.0696114	-0.486057	-0.214872	-0.71826	-0.7689	-0.848096	-0.644914	-0.217867	-0.556892	-0.934351	-0.282522	-0.399637	-0.284728	-0.681295	-0.417169	-0.118391	-0.417187	-0.381895	-0.225297	-0.463185	-0.741762	-0.509665	0.833519	-0.660254	0.634993	-0.475409	0.070836	0.0959975	0.280043	-0.66625	0.219968	-0.218251	-0.0777384	-0.142078	0.664754	-0.995609	-0.317414	0.349467	-0.311462	0.47935	0.493053	-0.190661	0.416326	-0.0539378	0.29022	0.189276	0.533281
-4.21062	0.147174	-1.47193	-0.068289	-0.486467	-0.214575	-0.7198	-0.768982	-0.848496	-0.645619	-0.21675	-0.557783	-0.93174	-0.283095	-0.398711	-0.28456	-0.681625	-0.417198	-0.118473	-0.416798	-0.38213	-0.225141	-0.462773	-0.740583	-0.509333	0.835526	-0.660884	0.634998	-0.474628	0.0706833	0.0968874	0.281971	-0.663822	0.218206	-0.216831	-0.0769978	-0.141845	0.665769	-0.995437	-0.318789	0.349809	-0.312436	0.479113	0.493071	-0.188893	0.416587	-0.0543533	0.293397	0.18911	0.532606
-4.20964	0.147058	-1.47215	-0.0669693	-0.486878	-0.214275	-0.72132	-0.769068	-0.84889	-0.646322	-0.215632	-0.558673	-0.929112	-0.283665	-0.397788	-0.284396	-0.681953	-0.41723	-0.118548	-0.416407	-0.382365	-0.224985	-0.462366	-0.739395	-0.508993	0.837523	-0.66151	0.635006	-0.473843	0.0705291	0.0977642	0.283906	-0.661379	0.216432	-0.215409	-0.0762581	-0.141605	0.666775	-0.995259	-0.320158	0.350155	-0.313406	0.478868	0.493083	-0.187126	0.41684	-0.0547492	0.296563	0.188942	0.531931
-4.20865	0.146926	-1.47237	-0.0656521	-0.487289	-0.213973	-0.722822	-0.76916	-0.849277	-0.647021	-0.214515	-0.559562	-0.926466	-0.284233	-0.396867	-0.284237	-0.682279	-0.417266	-0.118615	-0.416014	-0.382602	-0.224832	-0.461965	-0.738201	-0.508644	0.839508	-0.662132	0.635017	-0.473052	0.0703734	0.0986279	0.28585	-0.658921	0.214645	-0.213986	-0.0755194	-0.14136	0.667775	-0.995075	-0.321524	0.350505	-0.314373	0.478614	0.493088	-0.185359	0.417087	-0.0551258	0.299717	0.188772	0.531256
-4.20767	0.146779	-1.47258	-0.0643375	-0.4877	-0.213667	-0.724305	-0.769256	-0.849659	-0.647718	-0.213397	-0.560451	-0.923805	-0.284797	-0.395948	-0.284081	-0.682602	-0.417305	-0.118675	-0.415619	-0.38284	-0.22468	-0.461569	-0.737	-0.508286	0.841482	-0.662751	0.635031	-0.472257	0.0702163	0.0994785	0.287802	-0.65645	0.212847	-0.21256	-0.0747818	-0.141108	0.668766	-0.994885	-0.322884	0.350859	-0.315335	0.478353	0.493086	-0.183594	0.417326	-0.055483	0.302859	0.188599	0.530581
-4.20669	0.146616	-1.4728	-0.0630257	-0.488111	-0.213359	-0.725769	-0.769358	-0.850034	-0.648412	-0.21228	-0.561339	-0.921126	-0.285359	-0.395031	-0.28393	-0.682924	-0.417347	-0.118728	-0.415221	-0.38308	-0.224529	-0.461178	-0.735791	-0.507921	0.843444	-0.663367	0.635048	-0.471456	0.0700577	0.100316	0.289762	-0.653964	0.211036	-0.211133	-0.0740455	-0.14085	0.66975	-0.99469	-0.324239	0.351218	-0.316294	0.478083	0.493078	-0.181829	0.417558	-0.0558207	0.305989	0.188423	0.529907
-4.2057	0.146438	-1.47302	-0.0617166	-0.488522	-0.213049	-0.727214	-0.769464	-0.850403	-0.649103	-0.211162	-0.562227	-0.918431	-0.285919	-0.394117	-0.283783	-0.683243	-0.417393	-0.118773	-0.414822	-0.38332	-0.22438	-0.460794	-0.734576	-0.507546	0.845394	-0.663979	0.635068	-0.470652	0.0698977	0.10114	0.29173	-0.651465	0.209214	-0.209704	-0.0733107	-0.140585	0.670727	-0.994489	-0.325589	0.351582	-0.317248	0.477805	0.493064	-0.180066	0.417783	-0.0561392	0.309106	0.188246	0.529233
-4.20472	0.146244	-1.47323	-0.0604103	-0.488933	-0.212736	-0.72864	-0.769575	-0.850766	-0.649791	-0.210045	-0.563114	-0.915719	-0.286475	-0.393205	-0.283639	-0.683561	-0.417442	-0.11881	-0.414421	-0.383562	-0.224233	-0.460415	-0.733354	-0.507164	0.847332	-0.664587	0.635091	-0.469842	0.0697361	0.101951	0.293706	-0.648951	0.20738	-0.208273	-0.0725774	-0.140315	0.671696	-0.994281	-0.326934	0.35195	-0.318199	0.477519	0.493042	-0.178304	0.418001	-0.0564383	0.312211	0.188066	0.52856
-4.20374	0.146034	-1.47345	-0.0591069	-0.489343	-0.212421	-0.730047	-0.76969	-0.851123	-0.650476	-0.208928	-0.564	-0.91299	-0.287029	-0.392295	-0.2835	-0.683877	-0.417495	-0.11884	-0.414018	-0.383805	-0.224087	-0.460041	-0.732125	-0.506773	0.849258	-0.665191	0.635118	-0.469029	0.0695731	0.102749	0.295689	-0.646424	0.205534	-0.206841	-0.0718457	-0.140038	0.672656	-0.994068	-0.328274	0.352323	-0.319144	0.477225	0.493014	-0.176543	0.418211	-0.0567182	0.315304	0.187884	0.527887
-4.20275	0.14581	-1.47367	-0.0578064	-0.489753	-0.212103	-0.731434	-0.769811	-0.851474	-0.651159	-0.207811	-0.564885	-0.910245	-0.287579	-0.391387	-0.283364	-0.68419	-0.417551	-0.118862	-0.413613	-0.384049	-0.223943	-0.459673	-0.73089	-0.506374	0.851172	-0.66579	0.635147	-0.468211	0.0694086	0.103533	0.297681	-0.643883	0.203678	-0.205407	-0.0711158	-0.139754	0.673609	-0.993849	-0.329608	0.3527	-0.320086	0.476924	0.49298	-0.174784	0.418413	-0.0569789	0.318383	0.187699	0.527215
-4.20177	0.145569	-1.47388	-0.0565088	-0.490163	-0.211782	-0.732803	-0.769936	-0.851818	-0.651838	-0.206695	-0.56577	-0.907484	-0.288128	-0.390481	-0.283232	-0.684502	-0.417611	-0.118876	-0.413207	-0.384295	-0.223801	-0.459311	-0.729648	-0.505968	0.853073	-0.666386	0.635179	-0.467388	0.0692426	0.104304	0.299679	-0.641328	0.20181	-0.203971	-0.0703878	-0.139464	0.674555	-0.993625	-0.330936	0.353082	-0.321022	0.476614	0.492938	-0.173027	0.418608	-0.0572203	0.32145	0.187513	0.526544
-4.20079	0.145313	-1.4741	-0.0552143	-0.490573	-0.211459	-0.734153	-0.770065	-0.852156	-0.652513	-0.205579	-0.566654	-0.904707	-0.288673	-0.389577	-0.283104	-0.684811	-0.417674	-0.118883	-0.412798	-0.384542	-0.22366	-0.458955	-0.7284	-0.505553	0.854962	-0.666978	0.635215	-0.466562	0.069075	0.105062	0.301686	-0.63876	0.199931	-0.202535	-0.0696618	-0.139168	0.675492	-0.993394	-0.332259	0.353468	-0.321954	0.476297	0.492889	-0.171271	0.418795	-0.0574426	0.324504	0.187324	0.525873
-4.19981	0.145042	-1.47432	-0.0539228	-0.490982	-0.211134	-0.735484	-0.7702	-0.852489	-0.653186	-0.204463	-0.567537	-0.901913	-0.289215	-0.388676	-0.28298	-0.685119	-0.417741	-0.118882	-0.412388	-0.38479	-0.223521	-0.458605	-0.727146	-0.50513	0.856837	-0.667565	0.635254	-0.465732	0.068906	0.105807	0.3037	-0.636178	0.198041	-0.201097	-0.068938	-0.138865	0.676421	-0.993157	-0.333576	0.35386	-0.322881	0.475972	0.492834	-0.169518	0.418974	-0.0576457	0.327544	0.187134	0.525204
-4.19882	0.144755	-1.47453	-0.0526345	-0.49139	-0.210807	-0.736796	-0.770339	-0.852814	-0.653856	-0.203348	-0.568419	-0.899104	-0.289755	-0.387777	-0.282859	-0.685424	-0.417812	-0.118873	-0.411976	-0.385039	-0.223384	-0.45826	-0.725886	-0.5047	0.8587	-0.668148	0.635296	-0.464898	0.0687354	0.106538	0.305721	-0.633584	0.196141	-0.199657	-0.0682165	-0.138556	0.677342	-0.992915	-0.334886	0.354256	-0.323804	0.475639	0.492772	-0.167766	0.419146	-0.0578299	0.330571	0.186941	0.524535
-4.19784	0.144452	-1.47475	-0.0513493	-0.491797	-0.210477	-0.738089	-0.770483	-0.853134	-0.654522	-0.202233	-0.569301	-0.896279	-0.290292	-0.38688	-0.282742	-0.685728	-0.417886	-0.118857	-0.411563	-0.38529	-0.223249	-0.457921	-0.724619	-0.504262	0.86055	-0.668727	0.635341	-0.46406	0.0685633	0.107256	0.307749	-0.630976	0.19423	-0.198217	-0.0674973	-0.13824	0.678254	-0.992667	-0.336191	0.354656	-0.324721	0.475298	0.492702	-0.166017	0.419309	-0.0579949	0.333585	0.186746	0.523868
[truncated: 14,442 more rows]
[truncated: 11 more columns]

## Sheet: Figure 1C Bottom
Time from infusion onset (s)	Dopamine Release to Infusion (z-score, averaged across trials)
[truncated: 155 more rows]

## Sheet: Figure 1C Inset
Subject ID	Dopamine Release Response (mean z-score)
[truncated: 7 more rows]

[truncated: 1 more sheets: Figure 1D&E]
