# Supplementary material for: Dopamine activity encodes the changing valence of the same stimulus in conditioned taste aversion paradigms
Source: eLife. 2025 Mar 5;13:RP103260. doi: 10.7554/eLife.103260 (PMC11882140; doi:10.7554/eLife.103260)
Supplement: Figure 3—source data 1. [file elife-103260-fig3-data1.xlsx]

## Sheet: Figure 3B Top
Time from infusion onset (s)	Unpaired: Conditioning Day: Dopamine Release to Sucrose infusion (z-score, averaged across subjects)																														Unpaired: Test Day: Dopamine Release to Sucrose infusion (z-score, averaged across subjects)
	Trial																														Trial
	1	2	3	4	5	6	7	8	9	10	11	12	13	14	15	16	17	18	19	20	21	22	23	24	25	26	27	28	29	30	1	2	3	4	5	6	7	8	9	10	11	12	13	14	15	16	17	18	19
-5	-0.27028	-0.974712	0.232886	0.302198	-0.272172	0.166872	0.150551	0.728579	-0.243137	-0.252755	-0.0991601	-0.47558	-0.414097	0.193573	-0.157234	0.289808	-0.259532	0.232077	-0.279115	-0.473762	0.414508	-0.417045	-0.261385	-0.436234	0.122749	-0.0668762	0.0625203	-0.0373791	-0.0655101	-0.218624	-0.392119	-0.409131	-0.459573	0.035152	-0.365342	-0.0369497	-0.0480762	0.167678	-0.109737	-0.433918	-0.857531	-0.190187	-0.531138	0.0834347	-0.655016	-0.446911	-0.584522	-0.451621	0.35211
-4.99902	-0.271383	-0.973769	0.232259	0.301408	-0.27197	0.168072	0.14944	0.72663	-0.244978	-0.252298	-0.0978734	-0.475989	-0.415236	0.194134	-0.157261	0.289378	-0.259448	0.230568	-0.279421	-0.474234	0.412817	-0.417758	-0.262511	-0.435842	0.122099	-0.0679549	0.0626465	-0.0361213	-0.0658418	-0.220677	-0.393156	-0.408845	-0.459245	0.0349623	-0.365199	-0.0358429	-0.047746	0.167308	-0.110715	-0.434141	-0.858394	-0.190859	-0.530619	0.0841713	-0.655508	-0.44679	-0.584891	-0.452109	0.351768
-4.99803	-0.272491	-0.972829	0.231623	0.300602	-0.271761	0.169263	0.148314	0.724677	-0.246823	-0.251849	-0.0965782	-0.4764	-0.416377	0.194684	-0.157294	0.288932	-0.259363	0.229049	-0.279731	-0.474703	0.411116	-0.418469	-0.263632	-0.435441	0.12145	-0.0690351	0.0627674	-0.0348704	-0.0661779	-0.222721	-0.394194	-0.408545	-0.458899	0.0347766	-0.365052	-0.0347366	-0.0474189	0.166924	-0.111701	-0.434361	-0.859253	-0.19153	-0.530099	0.0848996	-0.656003	-0.446665	-0.585255	-0.452598	0.35143
-4.99705	-0.273604	-0.971889	0.230978	0.299781	-0.271545	0.170444	0.147175	0.722723	-0.248672	-0.251406	-0.0952746	-0.476814	-0.417519	0.195223	-0.157332	0.288472	-0.259277	0.227521	-0.280044	-0.475169	0.409407	-0.419177	-0.264748	-0.435031	0.120804	-0.0701167	0.0628831	-0.0336265	-0.0665184	-0.224757	-0.395235	-0.40823	-0.458534	0.0345949	-0.364902	-0.0336308	-0.047095	0.166528	-0.112697	-0.434576	-0.860106	-0.1922	-0.529577	0.0856194	-0.656499	-0.446536	-0.585614	-0.453086	0.351098
-4.99607	-0.274722	-0.970951	0.230324	0.298945	-0.271323	0.171616	0.146023	0.720766	-0.250524	-0.250971	-0.0939625	-0.477229	-0.418661	0.195752	-0.157375	0.287996	-0.25919	0.225984	-0.280361	-0.475631	0.407688	-0.419884	-0.265858	-0.434612	0.120159	-0.0711997	0.0629934	-0.0323896	-0.0668633	-0.226785	-0.396277	-0.4079	-0.458152	0.0344173	-0.364749	-0.0325254	-0.0467743	0.166119	-0.113701	-0.434787	-0.860955	-0.192868	-0.529054	0.0863307	-0.656997	-0.446403	-0.585969	-0.453574	0.35077
-4.99508	-0.275846	-0.970014	0.229661	0.298093	-0.271095	0.172777	0.144857	0.718808	-0.25238	-0.250543	-0.0926421	-0.477647	-0.419804	0.196269	-0.157423	0.287504	-0.259101	0.224437	-0.28068	-0.476091	0.40596	-0.420588	-0.266962	-0.434184	0.119516	-0.0722838	0.0630984	-0.0311598	-0.0672125	-0.228803	-0.397322	-0.407556	-0.457751	0.034244	-0.364592	-0.0314205	-0.0464568	0.165697	-0.114714	-0.434995	-0.861798	-0.193536	-0.52853	0.0870332	-0.657497	-0.446266	-0.586319	-0.454061	0.350446
-4.9941	-0.276974	-0.969079	0.228989	0.297225	-0.27086	0.173929	0.143678	0.716847	-0.254239	-0.250122	-0.0913134	-0.478067	-0.420948	0.196775	-0.157477	0.286997	-0.259012	0.222882	-0.281003	-0.476548	0.404223	-0.421291	-0.26806	-0.433747	0.118875	-0.073369	0.0631981	-0.0299371	-0.0675661	-0.230812	-0.398368	-0.407197	-0.457332	0.034075	-0.364433	-0.0303161	-0.0461425	0.165263	-0.115736	-0.435198	-0.862636	-0.194203	-0.528005	0.0877271	-0.657998	-0.446126	-0.586664	-0.454549	0.350128
-4.99312	-0.278108	-0.968146	0.228308	0.296343	-0.270618	0.17507	0.142485	0.714885	-0.256101	-0.249708	-0.0899763	-0.478489	-0.422092	0.197271	-0.157535	0.286475	-0.25892	0.221317	-0.281328	-0.477001	0.402478	-0.421991	-0.269152	-0.433301	0.118235	-0.0744553	0.0632925	-0.0287215	-0.0679239	-0.232813	-0.399416	-0.406824	-0.456895	0.0339105	-0.36427	-0.0292122	-0.0458314	0.164816	-0.116766	-0.435398	-0.863468	-0.194869	-0.527479	0.0884122	-0.658501	-0.445981	-0.587005	-0.455036	0.349814
-4.99214	-0.279247	-0.967214	0.227618	0.295445	-0.270371	0.176202	0.14128	0.712922	-0.257966	-0.249301	-0.088631	-0.478913	-0.423236	0.197755	-0.157598	0.285938	-0.258828	0.219744	-0.281657	-0.477451	0.400724	-0.422688	-0.270238	-0.432846	0.117597	-0.0755424	0.0633815	-0.0275132	-0.0682859	-0.234804	-0.400466	-0.406436	-0.45644	0.0337506	-0.364104	-0.0281089	-0.0455235	0.164357	-0.117806	-0.435594	-0.864295	-0.195534	-0.526952	0.0890885	-0.659006	-0.445832	-0.587341	-0.455522	0.349506
-4.99115	-0.280391	-0.966284	0.226919	0.294532	-0.270117	0.177324	0.140062	0.710957	-0.259834	-0.248902	-0.0872775	-0.47934	-0.424381	0.198229	-0.157667	0.285385	-0.258734	0.218162	-0.281988	-0.477897	0.398962	-0.423383	-0.271318	-0.432382	0.116961	-0.0766304	0.0634651	-0.0263121	-0.0686522	-0.236786	-0.401518	-0.406034	-0.455967	0.0335954	-0.363935	-0.0270061	-0.0452187	0.163885	-0.118855	-0.435786	-0.865117	-0.196198	-0.526423	0.0897558	-0.659511	-0.445679	-0.587673	-0.456008	0.349202
-4.99017	-0.28154	-0.965356	0.226212	0.293603	-0.269857	0.178435	0.138831	0.70899	-0.261705	-0.24851	-0.0859159	-0.479768	-0.425526	0.198692	-0.15774	0.284817	-0.258639	0.216572	-0.282322	-0.47834	0.397191	-0.424076	-0.272391	-0.43191	0.116327	-0.0777191	0.0635433	-0.0251183	-0.0690227	-0.238759	-0.402571	-0.405619	-0.455476	0.0334449	-0.363763	-0.0259038	-0.0449173	0.163401	-0.119912	-0.435974	-0.865934	-0.196861	-0.525895	0.0904142	-0.660019	-0.445521	-0.588	-0.456494	0.348903
-4.98919	-0.282694	-0.96443	0.225496	0.29266	-0.269591	0.179537	0.137588	0.707023	-0.263579	-0.248126	-0.084546	-0.480199	-0.426671	0.199144	-0.157818	0.284233	-0.258543	0.214974	-0.282659	-0.478779	0.395412	-0.424766	-0.273458	-0.431428	0.115694	-0.0788084	0.0636162	-0.0239318	-0.0693973	-0.240723	-0.403626	-0.405189	-0.454967	0.0332993	-0.363588	-0.0248022	-0.044619	0.162904	-0.120979	-0.436158	-0.866745	-0.197523	-0.525365	0.0910635	-0.660527	-0.445358	-0.588323	-0.45698	0.34861
-4.9882	-0.283854	-0.963506	0.224772	0.291702	-0.269319	0.180629	0.136333	0.705054	-0.265455	-0.247749	-0.0831682	-0.480632	-0.427816	0.199586	-0.157901	0.283634	-0.258445	0.213367	-0.282999	-0.479214	0.393625	-0.425454	-0.274518	-0.430937	0.115064	-0.0798982	0.0636836	-0.0227527	-0.0697761	-0.242677	-0.404683	-0.404745	-0.454439	0.0331587	-0.363411	-0.0237011	-0.044324	0.162395	-0.122054	-0.436339	-0.86755	-0.198185	-0.524834	0.0917037	-0.661037	-0.445191	-0.588642	-0.457464	0.348321
-4.98722	-0.285018	-0.962584	0.224039	0.290729	-0.269041	0.18171	0.135065	0.703085	-0.267334	-0.247379	-0.0817822	-0.481068	-0.428962	0.200016	-0.157989	0.28302	-0.258346	0.211753	-0.283341	-0.479646	0.39183	-0.426139	-0.275572	-0.430437	0.114434	-0.0809884	0.0637457	-0.0215811	-0.0701589	-0.244621	-0.405741	-0.404287	-0.453894	0.0330232	-0.36323	-0.0226006	-0.0440321	0.161874	-0.123139	-0.436516	-0.86835	-0.198845	-0.524303	0.0923347	-0.661548	-0.44502	-0.588956	-0.457949	0.348038
-4.98624	-0.286187	-0.961664	0.223298	0.289741	-0.268757	0.182781	0.133786	0.701115	-0.269215	-0.247018	-0.0803883	-0.481505	-0.430107	0.200436	-0.158081	0.28239	-0.258245	0.210131	-0.283686	-0.480074	0.390027	-0.426821	-0.276619	-0.429928	0.113807	-0.082079	0.0638023	-0.0204169	-0.0705458	-0.246556	-0.406801	-0.403816	-0.45333	0.0328929	-0.363048	-0.0215007	-0.0437436	0.161341	-0.124232	-0.436689	-0.869144	-0.199505	-0.523772	0.0929565	-0.662061	-0.444843	-0.589265	-0.458432	0.34776
-4.98525	-0.287362	-0.960747	0.222548	0.288738	-0.268468	0.183843	0.132495	0.699144	-0.271098	-0.246664	-0.0789864	-0.481945	-0.431252	0.200846	-0.158178	0.281745	-0.258143	0.208502	-0.284034	-0.480498	0.388217	-0.4275	-0.277659	-0.429411	0.113182	-0.0831698	0.0638535	-0.0192602	-0.0709368	-0.248482	-0.407862	-0.403331	-0.452749	0.0327679	-0.362862	-0.0204014	-0.0434582	0.160796	-0.125335	-0.436859	-0.869932	-0.200164	-0.523239	0.0935689	-0.662574	-0.444662	-0.589571	-0.458915	0.347487
-4.98427	-0.288541	-0.959832	0.22179	0.28772	-0.268173	0.184894	0.131192	0.697173	-0.272983	-0.246317	-0.0775766	-0.482387	-0.432398	0.201245	-0.158279	0.281084	-0.258039	0.206865	-0.284384	-0.480918	0.386398	-0.428177	-0.278692	-0.428884	0.112558	-0.0842607	0.0638992	-0.0181111	-0.0713317	-0.250397	-0.408925	-0.402833	-0.452149	0.0326482	-0.362674	-0.0193028	-0.0431761	0.160238	-0.126447	-0.437024	-0.870715	-0.200822	-0.522707	0.094172	-0.663089	-0.444475	-0.589872	-0.459397	0.34722
-4.98329	-0.289725	-0.958919	0.221024	0.286687	-0.267873	0.185935	0.129877	0.695202	-0.27487	-0.245979	-0.076159	-0.482831	-0.433543	0.201633	-0.158385	0.280408	-0.257934	0.205221	-0.284736	-0.481334	0.384573	-0.428851	-0.279718	-0.428348	0.111936	-0.0853516	0.0639395	-0.0169695	-0.0717305	-0.252303	-0.40999	-0.402322	-0.451532	0.0325341	-0.362484	-0.0182048	-0.0428972	0.159669	-0.127567	-0.437187	-0.871492	-0.201479	-0.522174	0.0947657	-0.663605	-0.444284	-0.590168	-0.459879	0.346957
-4.98231	-0.290915	-0.958009	0.220249	0.28564	-0.267566	0.186965	0.128552	0.69323	-0.276759	-0.245648	-0.0747335	-0.483277	-0.434687	0.202012	-0.158496	0.279717	-0.257827	0.20357	-0.28509	-0.481746	0.38274	-0.429522	-0.280736	-0.427804	0.111316	-0.0864425	0.0639743	-0.0158355	-0.0721333	-0.254199	-0.411056	-0.401797	-0.450896	0.0324255	-0.362291	-0.0171075	-0.0426216	0.159087	-0.128697	-0.437345	-0.872264	-0.202136	-0.521641	0.0953498	-0.664121	-0.444087	-0.590461	-0.460359	0.3467
-4.98132	-0.292109	-0.957101	0.219467	0.284579	-0.267255	0.187986	0.127215	0.691259	-0.27865	-0.245325	-0.0733003	-0.483726	-0.435832	0.202379	-0.15861	0.27901	-0.257719	0.201912	-0.285447	-0.482153	0.3809	-0.43019	-0.281748	-0.42725	0.110697	-0.0875332	0.0640036	-0.0147092	-0.07254	-0.256085	-0.412123	-0.401259	-0.450243	0.0323226	-0.362096	-0.0160108	-0.0423492	0.158494	-0.129836	-0.4375	-0.873029	-0.202792	-0.521107	0.0959244	-0.664639	-0.443885	-0.590749	-0.460839	0.346449
-4.98034	-0.293308	-0.956196	0.218677	0.283503	-0.266938	0.188996	0.125867	0.689287	-0.280542	-0.24501	-0.0718594	-0.484177	-0.436976	0.202736	-0.158729	0.278288	-0.257609	0.200247	-0.285806	-0.482556	0.379052	-0.430855	-0.282752	-0.426688	0.110081	-0.0886236	0.0640275	-0.0135906	-0.0729504	-0.257961	-0.413191	-0.400709	-0.449572	0.0322255	-0.361899	-0.0149148	-0.0420801	0.157888	-0.130984	-0.437651	-0.873788	-0.203447	-0.520574	0.0964894	-0.665158	-0.443677	-0.591033	-0.461318	0.346203
-4.97936	-0.294512	-0.955294	0.217878	0.282412	-0.266616	0.189996	0.124508	0.687316	-0.282435	-0.244703	-0.0704109	-0.48463	-0.438119	0.203083	-0.158853	0.277551	-0.257497	0.198576	-0.286167	-0.482955	0.377198	-0.431517	-0.283748	-0.426117	0.109466	-0.0897136	0.0640458	-0.0124797	-0.0733647	-0.259827	-0.414261	-0.400145	-0.448883	0.0321343	-0.3617	-0.0138195	-0.0418142	0.157271	-0.132141	-0.437799	-0.874542	-0.204101	-0.52004	0.0970447	-0.665677	-0.443464	-0.591313	-0.461796	0.345963
-4.97837	-0.295721	-0.954395	0.217072	0.281307	-0.266289	0.190985	0.123139	0.685345	-0.28433	-0.244404	-0.0689547	-0.485085	-0.439262	0.20342	-0.15898	0.276799	-0.257384	0.196898	-0.286529	-0.483349	0.375337	-0.432176	-0.284737	-0.425537	0.108853	-0.0908032	0.0640586	-0.0113765	-0.0737828	-0.261683	-0.415332	-0.399569	-0.448176	0.032049	-0.361498	-0.0127249	-0.0415516	0.156643	-0.133307	-0.437943	-0.87529	-0.204755	-0.519507	0.0975903	-0.666198	-0.443246	-0.591589	-0.462273	0.345728
-4.97739	-0.296934	-0.953499	0.216259	0.280188	-0.265957	0.191965	0.121759	0.683374	-0.286226	-0.244113	-0.067491	-0.485543	-0.440405	0.203747	-0.159112	0.276031	-0.257269	0.195215	-0.286894	-0.483739	0.373469	-0.432832	-0.285719	-0.424947	0.108241	-0.0918922	0.0640659	-0.0102811	-0.0742046	-0.263528	-0.416405	-0.398981	-0.447451	0.0319697	-0.361295	-0.0116309	-0.0412922	0.156002	-0.134483	-0.438084	-0.876031	-0.205408	-0.518973	0.0981261	-0.666719	-0.443021	-0.59186	-0.462748	0.345498
-4.97641	-0.298153	-0.952605	0.215437	0.279055	-0.265619	0.192934	0.120369	0.681404	-0.288122	-0.24383	-0.0660198	-0.486003	-0.441546	0.204063	-0.159248	0.275248	-0.257152	0.193525	-0.287261	-0.484125	0.371594	-0.433485	-0.286692	-0.424349	0.107632	-0.0929805	0.0640677	-0.00919348	-0.07463	-0.265364	-0.417478	-0.39838	-0.446709	0.0318966	-0.361089	-0.0105377	-0.041036	0.15535	-0.135667	-0.438221	-0.876767	-0.206061	-0.51844	0.0986521	-0.66724	-0.442791	-0.592128	-0.463223	0.345274
-4.97542	-0.299376	-0.951715	0.214608	0.277907	-0.265277	0.193892	0.118969	0.679435	-0.29002	-0.243555	-0.0645412	-0.486465	-0.442687	0.20437	-0.159388	0.274449	-0.257034	0.19183	-0.287629	-0.484505	0.369713	-0.434134	-0.287658	-0.423743	0.107024	-0.0940681	0.0640639	-0.00811372	-0.0750591	-0.267189	-0.418553	-0.397766	-0.445949	0.0318297	-0.360882	-0.00944511	-0.0407831	0.154687	-0.136861	-0.438355	-0.877496	-0.206713	-0.517907	0.0991681	-0.667763	-0.442555	-0.592392	-0.463697	0.345056
-4.97444	-0.300604	-0.950828	0.213772	0.276745	-0.26493	0.194841	0.117559	0.677466	-0.291918	-0.243289	-0.0630552	-0.486929	-0.443828	0.204666	-0.159532	0.273636	-0.256914	0.190128	-0.287999	-0.484881	0.367826	-0.43478	-0.288615	-0.423127	0.106418	-0.0951548	0.0640546	-0.00704182	-0.0754918	-0.269004	-0.419629	-0.397141	-0.445172	0.0317692	-0.360673	-0.00835328	-0.0405334	0.154012	-0.138064	-0.438486	-0.878219	-0.207365	-0.517374	0.0996743	-0.668286	-0.442313	-0.592651	-0.464169	0.344844
-4.97346	-0.301837	-0.949944	0.212928	0.27557	-0.264578	0.195778	0.116139	0.675498	-0.293817	-0.24303	-0.0615619	-0.487396	-0.444967	0.204953	-0.159679	0.272807	-0.256792	0.188422	-0.28837	-0.485252	0.365932	-0.435423	-0.289564	-0.422502	0.105813	-0.0962405	0.0640397	-0.0059778	-0.0759281	-0.270808	-0.420706	-0.396504	-0.444376	0.031715	-0.360462	-0.00726217	-0.040287	0.153326	-0.139276	-0.438613	-0.878936	-0.208016	-0.516842	0.10017	-0.668809	-0.442065	-0.592907	-0.46464	0.344637
-4.97247	-0.303074	-0.949064	0.212077	0.27438	-0.264222	0.196706	0.11471	0.673532	-0.295716	-0.24278	-0.0600613	-0.487865	-0.446105	0.205229	-0.159831	0.271963	-0.256668	0.18671	-0.288743	-0.485619	0.364033	-0.436062	-0.290506	-0.421869	0.105211	-0.0973252	0.0640193	-0.00492169	-0.0763679	-0.272602	-0.421784	-0.395854	-0.443564	0.0316673	-0.360249	-0.00617178	-0.0400438	0.152628	-0.140497	-0.438736	-0.879647	-0.208667	-0.51631	0.100657	-0.669333	-0.441811	-0.593159	-0.46511	0.344436
-4.97149	-0.304316	-0.948186	0.211218	0.273177	-0.263861	0.197623	0.113271	0.671567	-0.297616	-0.242538	-0.0585536	-0.488336	-0.447243	0.205496	-0.159986	0.271104	-0.256543	0.184993	-0.289118	-0.48598	0.362127	-0.436698	-0.291439	-0.421227	0.10461	-0.0984087	0.0639933	-0.00387351	-0.0768111	-0.274385	-0.422863	-0.395193	-0.442734	0.0316262	-0.360035	-0.00508212	-0.0398038	0.151919	-0.141727	-0.438857	-0.880351	-0.209317	-0.515778	0.101133	-0.669858	-0.44155	-0.593407	-0.465579	0.344241
-4.97051	-0.305563	-0.947313	0.210353	0.27196	-0.263496	0.19853	0.111823	0.669603	-0.299515	-0.242304	-0.0570387	-0.488809	-0.448379	0.205754	-0.160145	0.27023	-0.256416	0.183271	-0.289494	-0.486337	0.360215	-0.437331	-0.292363	-0.420575	0.104011	-0.0994909	0.0639617	-0.00283329	-0.0772578	-0.276158	-0.423943	-0.394521	-0.441886	0.0315917	-0.359819	-0.00399319	-0.0395671	0.1512	-0.142967	-0.438974	-0.881049	-0.209967	-0.515247	0.101598	-0.670383	-0.441284	-0.593651	-0.466046	0.344051
-4.96953	-0.306814	-0.946442	0.20948	0.270729	-0.263126	0.199426	0.110366	0.66764	-0.301415	-0.242079	-0.0555167	-0.489285	-0.449515	0.206001	-0.160307	0.269341	-0.256286	0.181544	-0.289871	-0.486688	0.358298	-0.437959	-0.293279	-0.419915	0.103414	-0.100572	0.0639245	-0.00180105	-0.0777078	-0.27792	-0.425024	-0.393837	-0.441021	0.0315639	-0.359601	-0.00290499	-0.0393336	0.150469	-0.144216	-0.439088	-0.881741	-0.210617	-0.514717	0.102054	-0.670908	-0.44101	-0.593891	-0.466512	0.343868
-4.96854	-0.30807	-0.945576	0.208601	0.269484	-0.262752	0.200312	0.1089	0.665679	-0.303314	-0.241861	-0.0539876	-0.489763	-0.450649	0.206239	-0.160473	0.268437	-0.256155	0.179812	-0.290249	-0.487034	0.356375	-0.438585	-0.294187	-0.419247	0.102818	-0.101651	0.0638817	-0.000776806	-0.0781613	-0.279671	-0.426106	-0.393142	-0.440139	0.031543	-0.359382	-0.00181754	-0.0391033	0.149727	-0.145474	-0.439198	-0.882426	-0.211266	-0.514188	0.102499	-0.671433	-0.440731	-0.594127	-0.466976	0.34369
-4.96756	-0.30933	-0.944713	0.207715	0.268226	-0.262374	0.201187	0.107426	0.663719	-0.305214	-0.241653	-0.0524517	-0.490244	-0.451781	0.206468	-0.160643	0.267517	-0.256023	0.178076	-0.290628	-0.487376	0.354446	-0.439206	-0.295085	-0.418569	0.102224	-0.102729	0.0638333	0.000239425	-0.078618	-0.281412	-0.427188	-0.392435	-0.43924	0.0315289	-0.359162	-0.000730823	-0.0388762	0.148974	-0.146741	-0.439305	-0.883105	-0.211915	-0.513659	0.102935	-0.671959	-0.440444	-0.59436	-0.467439	0.343519
-4.96658	-0.310595	-0.943854	0.206822	0.266955	-0.261991	0.202052	0.105943	0.661762	-0.307112	-0.241452	-0.0509088	-0.490726	-0.452913	0.206687	-0.160816	0.266583	-0.255888	0.176336	-0.291009	-0.487712	0.352512	-0.439824	-0.295975	-0.417883	0.101632	-0.103805	0.0637792	0.00124762	-0.0790779	-0.283142	-0.428272	-0.391718	-0.438324	0.0315218	-0.35894	0.000355147	-0.0386524	0.14821	-0.148017	-0.439409	-0.883778	-0.212564	-0.513131	0.103359	-0.672485	-0.440151	-0.594589	-0.4679	0.343353
-4.96559	-0.311865	-0.942999	0.205922	0.26567	-0.261605	0.202906	0.104451	0.659806	-0.30901	-0.24126	-0.0493591	-0.491211	-0.454043	0.206897	-0.160992	0.265634	-0.255751	0.174591	-0.29139	-0.488042	0.350573	-0.440438	-0.296856	-0.417188	0.101041	-0.10488	0.0637196	0.00224777	-0.0795411	-0.284861	-0.429356	-0.39099	-0.43739	0.0315217	-0.358717	0.00144037	-0.0384317	0.147436	-0.149303	-0.43951	-0.884443	-0.213212	-0.512604	0.103774	-0.673011	-0.439851	-0.594814	-0.46836	0.343193
-4.96461	-0.313138	-0.942148	0.205016	0.264372	-0.261214	0.20375	0.102952	0.657852	-0.310908	-0.241077	-0.0478027	-0.491699	-0.455172	0.207098	-0.161172	0.26467	-0.255612	0.172843	-0.291772	-0.488368	0.348628	-0.441048	-0.297729	-0.416484	0.100453	-0.105953	0.0636543	0.00323985	-0.0800074	-0.286569	-0.430441	-0.390251	-0.43644	0.0315288	-0.358492	0.00252485	-0.0382143	0.146651	-0.150597	-0.439608	-0.885103	-0.21386	-0.512078	0.104178	-0.673537	-0.439545	-0.595035	-0.468818	0.343039
-4.96363	-0.314416	-0.941301	0.204103	0.263061	-0.26082	0.204583	0.101444	0.6559	-0.312804	-0.240901	-0.0462396	-0.492189	-0.456299	0.20729	-0.161355	0.263691	-0.255472	0.171091	-0.292155	-0.488688	0.346679	-0.441654	-0.298592	-0.415771	0.0998656	-0.107023	0.0635834	0.00422386	-0.0804768	-0.288267	-0.431527	-0.389501	-0.435472	0.031543	-0.358267	0.00360857	-0.038	0.145856	-0.151901	-0.439703	-0.885755	-0.214509	-0.511553	0.104571	-0.674063	-0.439231	-0.595253	-0.469274	0.342892
-4.96264	-0.315698	-0.940457	0.203185	0.261737	-0.260422	0.205406	0.0999292	0.65395	-0.314699	-0.240735	-0.0446698	-0.492681	-0.457425	0.207472	-0.16154	0.262698	-0.255329	0.169335	-0.292538	-0.489002	0.344725	-0.442257	-0.299445	-0.415049	0.0992802	-0.108092	0.0635069	0.00519977	-0.0809492	-0.289953	-0.432613	-0.388741	-0.434488	0.0315644	-0.35804	0.00469155	-0.037789	0.14505	-0.153214	-0.439795	-0.886401	-0.215157	-0.511029	0.104955	-0.674589	-0.43891	-0.595467	-0.469729	0.34275
-4.96166	-0.316985	-0.939618	0.202259	0.260399	-0.26002	0.206218	0.0984064	0.652003	-0.316593	-0.240577	-0.0430935	-0.493175	-0.458549	0.207646	-0.161729	0.26169	-0.255185	0.167576	-0.292923	-0.489311	0.342765	-0.442855	-0.30029	-0.414319	0.0986964	-0.109158	0.0634247	0.00616757	-0.0814247	-0.291629	-0.4337	-0.387971	-0.433487	0.0315932	-0.357812	0.00577377	-0.0375811	0.144233	-0.154537	-0.439883	-0.88704	-0.215805	-0.510507	0.105327	-0.675115	-0.438582	-0.595678	-0.470181	0.342614
-4.96068	-0.318276	-0.938784	0.201328	0.259049	-0.259615	0.20702	0.0968762	0.650058	-0.318486	-0.240427	-0.0415106	-0.493672	-0.459672	0.207811	-0.161921	0.260667	-0.255038	0.165813	-0.293307	-0.489615	0.340801	-0.44345	-0.301125	-0.41358	0.0981143	-0.110223	0.0633369	0.00712727	-0.0819032	-0.293293	-0.434788	-0.387191	-0.432469	0.0316294	-0.357583	0.00685524	-0.0373764	0.143407	-0.155868	-0.439969	-0.887672	-0.216453	-0.509985	0.105689	-0.675641	-0.438247	-0.595885	-0.470632	0.342485
-4.9597	-0.319571	-0.937953	0.200391	0.257686	-0.259207	0.207811	0.0953388	0.648115	-0.320377	-0.240286	-0.0399214	-0.494171	-0.460792	0.207967	-0.162116	0.259629	-0.254889	0.164048	-0.293692	-0.489913	0.338833	-0.44404	-0.301951	-0.412833	0.0975339	-0.111285	0.0632434	0.00807884	-0.0823845	-0.294947	-0.435876	-0.3864	-0.431435	0.031673	-0.357353	0.00793597	-0.0371749	0.14257	-0.157209	-0.440051	-0.888298	-0.217101	-0.509466	0.106041	-0.676167	-0.437905	-0.596088	-0.471081	0.342361
-4.95871	-0.32087	-0.937127	0.199447	0.25631	-0.258794	0.208592	0.0937944	0.646175	-0.322267	-0.240153	-0.0383258	-0.494673	-0.461911	0.208114	-0.162314	0.258577	-0.254739	0.162279	-0.294077	-0.490205	0.33686	-0.444627	-0.302768	-0.412076	0.096955	-0.112344	0.0631442	0.00902228	-0.0828687	-0.296589	-0.436964	-0.385601	-0.430384	0.0317241	-0.357122	0.00901594	-0.0369766	0.141723	-0.158558	-0.440131	-0.888916	-0.217749	-0.508947	0.106381	-0.676692	-0.437555	-0.596288	-0.471528	0.342244
-4.95773	-0.322173	-0.936306	0.198498	0.254922	-0.258379	0.209362	0.0922432	0.644238	-0.324155	-0.240029	-0.036724	-0.495177	-0.463029	0.208253	-0.162514	0.25751	-0.254586	0.160508	-0.294463	-0.490492	0.334883	-0.445209	-0.303574	-0.411311	0.0963779	-0.113401	0.0630394	0.00995758	-0.0833557	-0.29822	-0.438053	-0.384791	-0.429317	0.0317828	-0.356891	0.0100952	-0.0367814	0.140867	-0.159917	-0.440208	-0.889528	-0.218397	-0.50843	0.106711	-0.677217	-0.437198	-0.596484	-0.471973	0.342133
-4.95675	-0.323481	-0.935489	0.197543	0.253521	-0.257961	0.210121	0.0906853	0.642303	-0.326041	-0.239914	-0.0351159	-0.495683	-0.464144	0.208383	-0.162718	0.256429	-0.254431	0.158734	-0.294848	-0.490773	0.332902	-0.445787	-0.304371	-0.410538	0.0958023	-0.114456	0.0629289	0.0108847	-0.0838455	-0.299841	-0.439143	-0.383972	-0.428234	0.0318491	-0.356658	0.0111736	-0.0365893	0.14	-0.161285	-0.440282	-0.890133	-0.219045	-0.507914	0.107031	-0.677742	-0.436833	-0.596677	-0.472415	0.342028
-4.95576	-0.324792	-0.934677	0.196583	0.252107	-0.257539	0.21087	0.0891209	0.640371	-0.327924	-0.239807	-0.0335017	-0.496192	-0.465257	0.208505	-0.162923	0.255334	-0.254274	0.156958	-0.295234	-0.491048	0.330916	-0.44636	-0.305158	-0.409755	0.0952283	-0.115507	0.0628128	0.0118037	-0.084338	-0.30145	-0.440233	-0.383143	-0.427134	0.0319231	-0.356425	0.0122513	-0.0364004	0.139124	-0.162662	-0.440353	-0.890731	-0.219693	-0.5074	0.107339	-0.678266	-0.43646	-0.596867	-0.472856	0.34193
-4.95478	-0.326107	-0.933869	0.195617	0.250681	-0.257114	0.211608	0.0875503	0.638442	-0.329806	-0.239709	-0.0318814	-0.496703	-0.466368	0.208619	-0.163132	0.254224	-0.254115	0.155179	-0.295619	-0.491317	0.328927	-0.44693	-0.305936	-0.408964	0.0946559	-0.116556	0.0626909	0.0127146	-0.0848331	-0.303048	-0.441323	-0.382306	-0.426018	0.0320048	-0.356191	0.0133283	-0.0362146	0.138238	-0.164049	-0.440422	-0.891321	-0.220342	-0.506888	0.107637	-0.67879	-0.43608	-0.597053	-0.473295	0.341837
-4.9538	-0.327426	-0.933066	0.194646	0.249243	-0.256687	0.212336	0.0859736	0.636517	-0.331685	-0.239619	-0.0302552	-0.497217	-0.467478	0.208725	-0.163342	0.2531	-0.253954	0.153398	-0.296005	-0.491581	0.326933	-0.447495	-0.306703	-0.408165	0.0940851	-0.117602	0.0625634	0.0136173	-0.0853308	-0.304634	-0.442413	-0.381459	-0.424886	0.0320944	-0.355956	0.0144046	-0.036032	0.137342	-0.165444	-0.440487	-0.891905	-0.220991	-0.506378	0.107924	-0.679313	-0.435692	-0.597236	-0.473731	0.341751
-4.95281	-0.328749	-0.932269	0.193669	0.247793	-0.256256	0.213053	0.084391	0.634594	-0.333561	-0.239538	-0.0286231	-0.497733	-0.468585	0.208822	-0.163556	0.251961	-0.253791	0.151616	-0.29639	-0.491838	0.324936	-0.448056	-0.30746	-0.407356	0.0935158	-0.118645	0.0624302	0.0145119	-0.085831	-0.30621	-0.443504	-0.380604	-0.423738	0.0321918	-0.355721	0.01548	-0.0358524	0.136437	-0.166848	-0.44055	-0.892482	-0.22164	-0.505869	0.1082	-0.679836	-0.435296	-0.597416	-0.474165	0.341672
-4.95183	-0.330076	-0.931476	0.192687	0.24633	-0.255823	0.213759	0.0828027	0.632675	-0.335435	-0.239465	-0.0269851	-0.498252	-0.46969	0.208912	-0.163771	0.250809	-0.253626	0.149831	-0.296774	-0.49209	0.322935	-0.448612	-0.308208	-0.406539	0.0929481	-0.119685	0.0622913	0.0153983	-0.0863338	-0.307774	-0.444595	-0.37974	-0.422575	0.0322971	-0.355485	0.0165548	-0.0356759	0.135522	-0.168262	-0.44061	-0.893051	-0.22229	-0.505362	0.108466	-0.680358	-0.434892	-0.597592	-0.474597	0.341598
-4.95085	-0.331406	-0.930688	0.191701	0.244856	-0.255387	0.214455	0.0812089	0.630759	-0.337306	-0.239401	-0.0253413	-0.498773	-0.470793	0.208993	-0.163989	0.249642	-0.253458	0.148045	-0.297159	-0.492336	0.320931	-0.449164	-0.308944	-0.405714	0.0923819	-0.120721	0.0621468	0.0162765	-0.0868389	-0.309327	-0.445686	-0.378868	-0.421395	0.0324103	-0.355248	0.0176288	-0.0355025	0.134599	-0.169684	-0.440668	-0.893613	-0.222939	-0.504857	0.10872	-0.680879	-0.434481	-0.597765	-0.475026	0.341531
-4.94986	-0.332741	-0.929905	0.190709	0.243369	-0.254949	0.215141	0.0796098	0.628846	-0.339174	-0.239346	-0.0236919	-0.499297	-0.471893	0.209067	-0.164209	0.248462	-0.253289	0.146258	-0.297542	-0.492575	0.318924	-0.449712	-0.309671	-0.40488	0.0918173	-0.121755	0.0619965	0.0171466	-0.0873465	-0.310868	-0.446778	-0.377987	-0.4202	0.0325316	-0.355011	0.0187021	-0.0353322	0.133666	-0.171116	-0.440723	-0.894168	-0.22359	-0.504354	0.108964	-0.6814	-0.434061	-0.597934	-0.475453	0.34147
-4.94888	-0.334079	-0.929127	0.189712	0.241871	-0.254508	0.215815	0.0780056	0.626937	-0.341038	-0.2393	-0.0220369	-0.499823	-0.472991	0.209134	-0.16443	0.247267	-0.253117	0.144469	-0.297926	-0.492809	0.316913	-0.450254	-0.310387	-0.404037	0.0912541	-0.122785	0.0618406	0.0180086	-0.0878563	-0.312399	-0.447869	-0.377098	-0.41899	0.0326609	-0.354774	0.0197747	-0.035165	0.132724	-0.172557	-0.440775	-0.894716	-0.22424	-0.503853	0.109196	-0.68192	-0.433633	-0.598101	-0.475877	0.341415
-4.9479	-0.33542	-0.928355	0.188711	0.240361	-0.254065	0.216479	0.0763964	0.625031	-0.342899	-0.239262	-0.0203764	-0.500351	-0.474087	0.209193	-0.164654	0.246059	-0.252943	0.142679	-0.298308	-0.493036	0.314899	-0.450793	-0.311093	-0.403186	0.0906925	-0.123811	0.061679	0.0188624	-0.0883684	-0.313918	-0.44896	-0.376201	-0.417764	0.0327983	-0.354536	0.0208465	-0.0350008	0.131773	-0.174006	-0.440825	-0.895257	-0.224892	-0.503355	0.109418	-0.682439	-0.433196	-0.598264	-0.476299	0.341367
-4.94692	-0.336765	-0.927588	0.187705	0.23884	-0.25362	0.217132	0.0747824	0.623129	-0.344757	-0.239232	-0.0187104	-0.500883	-0.47518	0.209244	-0.16488	0.244837	-0.252767	0.140888	-0.298689	-0.493257	0.312882	-0.451326	-0.311788	-0.402326	0.0901322	-0.124834	0.0615117	0.0197081	-0.0888827	-0.315425	-0.450052	-0.375296	-0.416522	0.0329439	-0.354298	0.0219176	-0.0348397	0.130813	-0.175465	-0.440873	-0.89579	-0.225543	-0.502858	0.109629	-0.682957	-0.432752	-0.598424	-0.476718	0.341326
-4.94593	-0.338113	-0.926826	0.186695	0.237307	-0.253172	0.217775	0.0731639	0.621231	-0.346611	-0.239211	-0.017039	-0.501416	-0.476271	0.209288	-0.165108	0.243601	-0.252588	0.139097	-0.29907	-0.493473	0.310862	-0.451855	-0.312473	-0.401458	0.0895735	-0.125854	0.0613387	0.0205456	-0.0893991	-0.316922	-0.451143	-0.374383	-0.415266	0.0330976	-0.354059	0.022988	-0.0346816	0.129845	-0.176932	-0.440918	-0.896315	-0.226196	-0.502364	0.109828	-0.683474	-0.432299	-0.598581	-0.477135	0.34129
-4.94495	-0.339465	-0.92607	0.18568	0.235763	-0.252723	0.218407	0.0715411	0.619336	-0.348461	-0.239199	-0.0153624	-0.501952	-0.477359	0.209325	-0.165337	0.242352	-0.252407	0.137305	-0.29945	-0.493682	0.308839	-0.45238	-0.313146	-0.400582	0.0890162	-0.126869	0.06116	0.0213751	-0.0899176	-0.318407	-0.452235	-0.373463	-0.413995	0.0332595	-0.353821	0.0240577	-0.0345265	0.128868	-0.178409	-0.44096	-0.896834	-0.226849	-0.501872	0.110017	-0.683991	-0.431837	-0.598735	-0.477549	0.341261
-4.94397	-0.34082	-0.925319	0.184661	0.234207	-0.252271	0.219029	0.0699141	0.617446	-0.350307	-0.239196	-0.0136806	-0.502491	-0.478445	0.209355	-0.165568	0.241089	-0.252225	0.135512	-0.299828	-0.493884	0.306813	-0.452899	-0.313809	-0.399696	0.0884603	-0.127881	0.0609756	0.0221964	-0.0904382	-0.319881	-0.453326	-0.372536	-0.412708	0.0334297	-0.353581	0.0251266	-0.0343744	0.127883	-0.179894	-0.441	-0.897344	-0.227503	-0.501382	0.110194	-0.684506	-0.431367	-0.598886	-0.47796	0.341238
-4.94298	-0.342179	-0.924574	0.183638	0.232641	-0.251818	0.21964	0.068283	0.615559	-0.352149	-0.239201	-0.0119937	-0.503032	-0.479528	0.209378	-0.165801	0.239812	-0.252039	0.133719	-0.300205	-0.494081	0.304785	-0.453414	-0.314461	-0.398803	0.0879058	-0.128889	0.0607856	0.0230097	-0.0909607	-0.321343	-0.454417	-0.371601	-0.411407	0.0336082	-0.353342	0.0261949	-0.0342253	0.126889	-0.181388	-0.441038	-0.897848	-0.228157	-0.500895	0.110361	-0.68502	-0.430888	-0.599033	-0.478369	0.341222
-4.942	-0.343541	-0.923834	0.18261	0.231063	-0.251363	0.22024	0.0666482	0.613677	-0.353987	-0.239214	-0.0103017	-0.503576	-0.480608	0.209394	-0.166035	0.238522	-0.251852	0.131926	-0.300581	-0.494271	0.302755	-0.453924	-0.315103	-0.397901	0.0873527	-0.129892	0.0605899	0.0238148	-0.091485	-0.322794	-0.455508	-0.37066	-0.410091	0.033795	-0.353103	0.0272625	-0.0340791	0.125887	-0.182891	-0.441074	-0.898343	-0.228812	-0.50041	0.110516	-0.685532	-0.430401	-0.599178	-0.478774	0.341213
-4.94102	-0.344905	-0.923101	0.181579	0.229474	-0.250906	0.220829	0.0650098	0.611798	-0.35582	-0.239236	-0.00860482	-0.504123	-0.481686	0.209403	-0.166271	0.237219	-0.251662	0.130133	-0.300955	-0.494455	0.300722	-0.454429	-0.315733	-0.39699	0.086801	-0.130892	0.0603885	0.0246119	-0.0920113	-0.324233	-0.456599	-0.369712	-0.40876	0.0339902	-0.352863	0.0283293	-0.033936	0.124877	-0.184403	-0.441107	-0.898831	-0.229468	-0.499928	0.110661	-0.686044	-0.429905	-0.59932	-0.479177	0.341209
-4.94003	-0.346273	-0.922373	0.180544	0.227875	-0.250448	0.221408	0.063368	0.609924	-0.357648	-0.239267	-0.00690306	-0.504672	-0.482761	0.209406	-0.166508	0.235903	-0.25147	0.12834	-0.301328	-0.494632	0.298686	-0.454929	-0.316351	-0.396071	0.0862506	-0.131887	0.0601814	0.025401	-0.0925393	-0.325662	-0.457689	-0.368757	-0.407415	0.0341937	-0.352624	0.0293955	-0.0337957	0.123859	-0.185924	-0.441139	-0.899312	-0.230125	-0.499449	0.110794	-0.686554	-0.4294	-0.599458	-0.479577	0.341212
-4.93905	-0.347644	-0.921651	0.179506	0.226264	-0.249988	0.221976	0.061723	0.608054	-0.359472	-0.239306	-0.00519653	-0.505223	-0.483833	0.209402	-0.166746	0.234573	-0.251276	0.126547	-0.3017	-0.494803	0.296649	-0.455425	-0.316959	-0.395144	0.0857016	-0.132878	0.0599687	0.026182	-0.093069	-0.327078	-0.458779	-0.367795	-0.406056	0.0344057	-0.352384	0.0304611	-0.0336584	0.122833	-0.187453	-0.441168	-0.899785	-0.230783	-0.498972	0.110916	-0.687063	-0.428886	-0.599594	-0.479974	0.341222
-4.93807	-0.349018	-0.920935	0.178464	0.224643	-0.249526	0.222534	0.060075	0.606189	-0.361291	-0.239354	-0.0034853	-0.505778	-0.484902	0.209392	-0.166985	0.233231	-0.25108	0.124755	-0.302069	-0.494968	0.29461	-0.455915	-0.317556	-0.394208	0.0851538	-0.133865	0.0597503	0.026955	-0.0936003	-0.328484	-0.459869	-0.366828	-0.404682	0.0346261	-0.352144	0.0315259	-0.0335241	0.121799	-0.188991	-0.441194	-0.90025	-0.231442	-0.498498	0.111027	-0.687571	-0.428364	-0.599727	-0.480368	0.341238
-4.93709	-0.350395	-0.920226	0.177418	0.223012	-0.249064	0.223081	0.0584241	0.604327	-0.363104	-0.23941	-0.00176947	-0.506335	-0.485968	0.209376	-0.167226	0.231876	-0.250881	0.122963	-0.302437	-0.495127	0.292568	-0.4564	-0.318141	-0.393264	0.0846074	-0.134847	0.0595262	0.02772	-0.0941333	-0.329878	-0.460958	-0.365854	-0.403295	0.0348549	-0.351905	0.0325901	-0.0333926	0.120758	-0.190538	-0.441219	-0.900707	-0.232101	-0.498027	0.111127	-0.688077	-0.427832	-0.599857	-0.480758	0.34126
-4.9361	-0.351775	-0.919522	0.17637	0.22137	-0.2486	0.223617	0.0567706	0.602471	-0.364913	-0.239475	-4.91269e-05	-0.506894	-0.487031	0.209354	-0.167467	0.230507	-0.25068	0.121172	-0.302803	-0.495279	0.290525	-0.456881	-0.318714	-0.392312	0.0840622	-0.135825	0.0592965	0.028477	-0.0946677	-0.331261	-0.462047	-0.364874	-0.401893	0.0350922	-0.351665	0.0336536	-0.033264	0.119709	-0.192093	-0.441242	-0.901157	-0.232762	-0.497558	0.111215	-0.688582	-0.427291	-0.599984	-0.481146	0.341289
-4.93512	-0.353157	-0.918824	0.175318	0.219718	-0.248135	0.224143	0.0551146	0.600618	-0.366716	-0.239549	0.00167564	-0.507456	-0.488091	0.209326	-0.167709	0.229126	-0.250476	0.119382	-0.303166	-0.495424	0.288481	-0.457356	-0.319276	-0.391351	0.0835183	-0.136798	0.0590611	0.0292261	-0.0952036	-0.332632	-0.463135	-0.363888	-0.400478	0.0353381	-0.351425	0.0347165	-0.0331383	0.118653	-0.193657	-0.441263	-0.901599	-0.233424	-0.497093	0.111293	-0.689085	-0.426741	-0.600108	-0.48153	0.341324
-4.93414	-0.354542	-0.918133	0.174263	0.218056	-0.247669	0.224658	0.0534564	0.598771	-0.368513	-0.23963	0.00340475	-0.508021	-0.489148	0.209291	-0.167953	0.227732	-0.25027	0.117593	-0.303528	-0.495563	0.286434	-0.457827	-0.319827	-0.390382	0.0829756	-0.137766	0.0588201	0.0299672	-0.0957409	-0.333992	-0.464223	-0.362897	-0.399049	0.0355924	-0.351186	0.0357787	-0.0330154	0.11759	-0.19523	-0.441282	-0.902032	-0.234087	-0.496631	0.111359	-0.689586	-0.426182	-0.600229	-0.481911	0.341366
-4.93315	-0.35593	-0.917448	0.173205	0.216383	-0.247202	0.225162	0.0517961	0.596928	-0.370304	-0.239721	0.0051381	-0.508589	-0.490202	0.209251	-0.168196	0.226326	-0.250062	0.115806	-0.303887	-0.495696	0.284387	-0.458292	-0.320366	-0.389405	0.0824342	-0.13873	0.0585735	0.0307005	-0.0962796	-0.335341	-0.46531	-0.3619	-0.397607	0.0358553	-0.350947	0.0368402	-0.0328954	0.116519	-0.196811	-0.441299	-0.902458	-0.234751	-0.496171	0.111414	-0.690086	-0.425614	-0.600348	-0.482289	0.341414
-4.93217	-0.35732	-0.91677	0.172144	0.214701	-0.246734	0.225656	0.0501339	0.595089	-0.37209	-0.239819	0.00687562	-0.509159	-0.491253	0.209206	-0.168441	0.224908	-0.249852	0.11402	-0.304244	-0.495822	0.282338	-0.458752	-0.320893	-0.38842	0.0818939	-0.139688	0.0583212	0.0314258	-0.0968194	-0.336678	-0.466397	-0.360898	-0.396151	0.0361267	-0.350708	0.0379012	-0.0327782	0.115442	-0.198401	-0.441314	-0.902877	-0.235417	-0.495715	0.111458	-0.690584	-0.425036	-0.600464	-0.482664	0.341469
-4.93119	-0.358713	-0.916098	0.171081	0.213009	-0.246266	0.226139	0.0484701	0.593256	-0.37387	-0.239926	0.0086172	-0.509732	-0.492301	0.209155	-0.168686	0.223476	-0.249639	0.112235	-0.304599	-0.495941	0.280287	-0.459207	-0.321408	-0.387426	0.0813548	-0.140642	0.0580634	0.0321433	-0.0973605	-0.338004	-0.467483	-0.359891	-0.394682	0.0364067	-0.350469	0.0389615	-0.0326638	0.114358	-0.199999	-0.441328	-0.903287	-0.236084	-0.495262	0.111491	-0.691081	-0.42445	-0.600577	-0.483035	0.34153
-4.9302	-0.360108	-0.915433	0.170015	0.211307	-0.245797	0.226612	0.0468047	0.591427	-0.375643	-0.240042	0.0103628	-0.510307	-0.493345	0.209099	-0.168932	0.222033	-0.249424	0.110452	-0.304951	-0.496054	0.278236	-0.459657	-0.321912	-0.386424	0.0808169	-0.14159	0.0577999	0.032853	-0.0979027	-0.339319	-0.468568	-0.358879	-0.3932	0.0366953	-0.35023	0.0400212	-0.0325522	0.113267	-0.201605	-0.441339	-0.903689	-0.236752	-0.494812	0.111513	-0.691575	-0.423853	-0.600687	-0.483403	0.341598
-4.92922	-0.361506	-0.914774	0.168947	0.209596	-0.245327	0.227074	0.0451381	0.589604	-0.37741	-0.240165	0.0121122	-0.510886	-0.494386	0.209037	-0.169178	0.220578	-0.249206	0.10867	-0.3053	-0.496161	0.276183	-0.460101	-0.322404	-0.385414	0.0802801	-0.142533	0.0575308	0.0335548	-0.0984459	-0.340622	-0.469652	-0.357863	-0.391705	0.0369924	-0.349992	0.0410803	-0.0324433	0.112169	-0.20322	-0.441349	-0.904083	-0.237421	-0.494365	0.111523	-0.692068	-0.423247	-0.600794	-0.483767	0.341672
-4.92824	-0.362905	-0.914122	0.167876	0.207875	-0.244857	0.227525	0.0434704	0.587785	-0.37917	-0.240297	0.0138654	-0.511467	-0.495424	0.208971	-0.169424	0.21911	-0.248986	0.106891	-0.305647	-0.496261	0.27413	-0.46054	-0.322883	-0.384396	0.0797444	-0.143471	0.0572561	0.0342489	-0.0989902	-0.341914	-0.470736	-0.356841	-0.390197	0.0372981	-0.349754	0.0421388	-0.0323372	0.111065	-0.204844	-0.441358	-0.904469	-0.238092	-0.493922	0.111522	-0.692559	-0.422632	-0.600899	-0.484128	0.341752
-4.92726	-0.364307	-0.913477	0.166803	0.206145	-0.244387	0.227965	0.0418017	0.585971	-0.380924	-0.240438	0.0156224	-0.512051	-0.496458	0.208899	-0.169671	0.217631	-0.248764	0.105114	-0.305991	-0.496354	0.272075	-0.460974	-0.323351	-0.38337	0.0792098	-0.144404	0.0569758	0.0349353	-0.0995353	-0.343195	-0.471818	-0.355816	-0.388676	0.0376125	-0.349516	0.0431967	-0.0322338	0.109955	-0.206475	-0.441365	-0.904847	-0.238764	-0.493481	0.11151	-0.693048	-0.422007	-0.601002	-0.484485	0.341839
-4.92627	-0.365711	-0.912839	0.165728	0.204405	-0.243916	0.228395	0.0401323	0.584162	-0.38267	-0.240586	0.0173829	-0.512637	-0.497489	0.208823	-0.169918	0.216139	-0.248539	0.103339	-0.306331	-0.496441	0.270021	-0.461403	-0.323806	-0.382335	0.0786762	-0.145331	0.05669	0.0356139	-0.100081	-0.344464	-0.4729	-0.354786	-0.387143	0.0379354	-0.349279	0.044254	-0.0321332	0.108839	-0.208115	-0.44137	-0.905217	-0.239438	-0.493045	0.111487	-0.693534	-0.421373	-0.601101	-0.484839	0.341932
-4.92529	-0.367117	-0.912207	0.164652	0.202656	-0.243445	0.228815	0.0384624	0.582359	-0.38441	-0.240743	0.0191469	-0.513227	-0.498516	0.208742	-0.170165	0.214636	-0.248312	0.101566	-0.306669	-0.496521	0.267965	-0.461827	-0.324249	-0.381293	0.0781437	-0.146253	0.0563986	0.0362849	-0.100628	-0.345723	-0.473981	-0.353752	-0.385598	0.0382669	-0.349042	0.0453107	-0.0320352	0.107716	-0.209763	-0.441373	-0.905578	-0.240113	-0.492612	0.111452	-0.694019	-0.420728	-0.601198	-0.485189	0.342032
-4.92431	-0.368525	-0.911583	0.163573	0.200899	-0.242974	0.229223	0.0367921	0.580561	-0.386142	-0.240908	0.0209144	-0.513819	-0.49954	0.208656	-0.170412	0.213122	-0.248083	0.0997963	-0.307004	-0.496595	0.265909	-0.462245	-0.32468	-0.380242	0.0776122	-0.147169	0.0561017	0.0369482	-0.101176	-0.34697	-0.475061	-0.352714	-0.38404	0.038607	-0.348805	0.0463669	-0.0319399	0.106588	-0.211419	-0.441376	-0.905932	-0.240791	-0.492182	0.111407	-0.694502	-0.420074	-0.601292	-0.485535	0.342138
-4.92332	-0.369935	-0.910966	0.162493	0.199132	-0.242503	0.229622	0.0351216	0.578767	-0.387867	-0.241081	0.0226852	-0.514414	-0.50056	0.208566	-0.170658	0.211596	-0.247851	0.0980289	-0.307335	-0.496662	0.263853	-0.462658	-0.325099	-0.379184	0.0770818	-0.148079	0.0557992	0.037604	-0.101724	-0.348206	-0.476139	-0.351673	-0.382471	0.0389556	-0.348569	0.0474225	-0.0318473	0.105454	-0.213083	-0.441377	-0.906277	-0.241469	-0.491756	0.11135	-0.694982	-0.419411	-0.601384	-0.485877	0.34225
-4.92234	-0.371347	-0.910355	0.161411	0.197357	-0.242032	0.230009	0.0334512	0.576979	-0.389585	-0.241263	0.0244592	-0.515011	-0.501577	0.208472	-0.170905	0.210058	-0.247617	0.0962642	-0.307663	-0.496722	0.261796	-0.463065	-0.325505	-0.378117	0.0765523	-0.148983	0.0554912	0.0382521	-0.102272	-0.34943	-0.477217	-0.350628	-0.380889	0.0393129	-0.348333	0.0484776	-0.0317573	0.104315	-0.214755	-0.441376	-0.906614	-0.24215	-0.491334	0.111282	-0.69546	-0.418737	-0.601474	-0.486216	0.342369
-4.92136	-0.37276	-0.909752	0.160328	0.195573	-0.241561	0.230386	0.031781	0.575197	-0.391295	-0.241452	0.0262364	-0.515612	-0.50259	0.208374	-0.171151	0.208509	-0.24738	0.0945025	-0.307987	-0.496776	0.259739	-0.463467	-0.325899	-0.377042	0.0760237	-0.149882	0.0551777	0.0388927	-0.102821	-0.350644	-0.478293	-0.34958	-0.379296	0.0396787	-0.348098	0.0495321	-0.0316699	0.10317	-0.216435	-0.441374	-0.906942	-0.242832	-0.490915	0.111203	-0.695936	-0.418054	-0.60156	-0.486551	0.342494
-4.92037	-0.374175	-0.909157	0.159244	0.193781	-0.241091	0.230752	0.0301112	0.57342	-0.392997	-0.241649	0.0280165	-0.516215	-0.5036	0.208271	-0.171397	0.206949	-0.247141	0.0927438	-0.308308	-0.496824	0.257682	-0.463864	-0.32628	-0.37596	0.0754961	-0.150775	0.0548588	0.0395259	-0.103371	-0.351847	-0.479369	-0.348528	-0.377691	0.0400531	-0.347864	0.0505861	-0.0315851	0.102019	-0.218123	-0.441371	-0.907263	-0.243516	-0.4905	0.111112	-0.696409	-0.417361	-0.601645	-0.486882	0.342626
-4.91939	-0.375592	-0.908568	0.158158	0.19198	-0.240621	0.231108	0.028442	0.571648	-0.394691	-0.241855	0.0297996	-0.516821	-0.504606	0.208165	-0.171642	0.205378	-0.246899	0.0909883	-0.308625	-0.496864	0.255625	-0.464255	-0.326649	-0.374869	0.0749694	-0.151662	0.0545343	0.0401516	-0.103921	-0.353038	-0.480443	-0.347474	-0.376075	0.040436	-0.347629	0.0516396	-0.0315029	0.100864	-0.219819	-0.441367	-0.907574	-0.244201	-0.490089	0.111011	-0.69688	-0.416657	-0.601726	-0.487209	0.342764
-4.91841	-0.37701	-0.907987	0.157072	0.190171	-0.240151	0.231453	0.0267735	0.569882	-0.396377	-0.242068	0.0315856	-0.51743	-0.505608	0.208055	-0.171887	0.203796	-0.246655	0.0892361	-0.308938	-0.496899	0.253569	-0.464641	-0.327005	-0.373771	0.0744436	-0.152542	0.0542044	0.0407699	-0.104471	-0.354218	-0.481515	-0.346417	-0.374448	0.0408275	-0.347396	0.0526925	-0.0314232	0.0997033	-0.221522	-0.441362	-0.907878	-0.244889	-0.489681	0.110898	-0.697349	-0.415944	-0.601806	-0.487531	0.342908
-4.91742	-0.378429	-0.907414	0.155984	0.188354	-0.239682	0.231788	0.0251061	0.568121	-0.398054	-0.242289	0.0333743	-0.518042	-0.506606	0.207941	-0.172131	0.202204	-0.246409	0.0874874	-0.309248	-0.496926	0.251512	-0.465022	-0.327348	-0.372665	0.0739187	-0.153417	0.053869	0.0413808	-0.105021	-0.355388	-0.482587	-0.345357	-0.372809	0.0412275	-0.347163	0.053745	-0.0313461	0.098538	-0.223234	-0.441355	-0.908173	-0.245579	-0.489278	0.110775	-0.697815	-0.415221	-0.601882	-0.48785	0.343058
-4.91644	-0.37985	-0.906848	0.154896	0.186529	-0.239213	0.232112	0.0234397	0.566366	-0.399723	-0.242518	0.0351656	-0.518657	-0.5076	0.207824	-0.172374	0.2006	-0.24616	0.0857422	-0.309553	-0.496947	0.249456	-0.465397	-0.327679	-0.371551	0.0733946	-0.154285	0.0535282	0.0419844	-0.105572	-0.356546	-0.483657	-0.344295	-0.37116	0.041636	-0.34693	0.0547969	-0.0312715	0.097368	-0.224953	-0.441348	-0.90846	-0.24627	-0.488878	0.11064	-0.698279	-0.414488	-0.601957	-0.488165	0.343215
-4.91546	-0.381271	-0.90629	0.153807	0.184697	-0.238746	0.232425	0.0217748	0.564616	-0.401384	-0.242755	0.0369595	-0.519275	-0.508591	0.207704	-0.172617	0.198987	-0.245909	0.0840007	-0.309854	-0.496962	0.247401	-0.465767	-0.327996	-0.370429	0.0728713	-0.155147	0.053182	0.0425807	-0.106123	-0.357694	-0.484725	-0.34323	-0.3695	0.042053	-0.346698	0.0558484	-0.0311994	0.0961934	-0.226679	-0.441339	-0.908738	-0.246964	-0.488482	0.110494	-0.69874	-0.413744	-0.602029	-0.488476	0.343378
-4.91448	-0.382694	-0.905739	0.152718	0.182856	-0.238279	0.232728	0.0201113	0.562872	-0.403035	-0.243	0.0387558	-0.519895	-0.509577	0.20758	-0.172859	0.197362	-0.245655	0.0822631	-0.310151	-0.49697	0.245346	-0.466131	-0.328301	-0.369299	0.0723488	-0.156003	0.0528304	0.0431698	-0.106673	-0.35883	-0.485792	-0.342163	-0.367829	0.0424784	-0.346467	0.0568994	-0.0311297	0.0950144	-0.228413	-0.44133	-0.909007	-0.247659	-0.488091	0.110337	-0.699198	-0.412991	-0.602098	-0.488782	0.343547
-4.91349	-0.384118	-0.905196	0.151628	0.181008	-0.237813	0.23302	0.0184495	0.561134	-0.404678	-0.243252	0.0405545	-0.520518	-0.51056	0.207453	-0.173099	0.195728	-0.245399	0.0805294	-0.310444	-0.496971	0.243292	-0.466489	-0.328593	-0.368161	0.0718271	-0.156852	0.0524734	0.0437517	-0.107223	-0.359956	-0.486857	-0.341095	-0.366148	0.0429123	-0.346236	0.0579499	-0.0310625	0.0938312	-0.230155	-0.44132	-0.909268	-0.248357	-0.487703	0.110168	-0.699653	-0.412227	-0.602166	-0.489084	0.343723
-4.91251	-0.385543	-0.904661	0.150538	0.179152	-0.237347	0.233302	0.0167896	0.559401	-0.406312	-0.243512	0.0423554	-0.521145	-0.511539	0.207324	-0.173339	0.194083	-0.24514	0.0787998	-0.310733	-0.496966	0.241238	-0.466843	-0.328872	-0.367016	0.0713061	-0.157694	0.0521111	0.0443265	-0.107774	-0.361071	-0.487921	-0.340025	-0.364457	0.0433546	-0.346006	0.0589999	-0.0309977	0.0926439	-0.231904	-0.441309	-0.909521	-0.249057	-0.487319	0.109989	-0.700106	-0.411453	-0.602231	-0.489382	0.343904
-4.91153	-0.386969	-0.904134	0.149448	0.177289	-0.236883	0.233573	0.0151318	0.557674	-0.407936	-0.24378	0.0441584	-0.521774	-0.512514	0.207191	-0.173577	0.192428	-0.244879	0.0770743	-0.311016	-0.496955	0.239186	-0.467191	-0.329138	-0.365863	0.0707859	-0.15853	0.0517435	0.0448942	-0.108324	-0.362175	-0.488983	-0.338953	-0.362755	0.0438052	-0.345777	0.0600496	-0.0309353	0.0914526	-0.23366	-0.441297	-0.909765	-0.249759	-0.48694	0.109799	-0.700556	-0.410669	-0.602293	-0.489676	0.344092
-4.91054	-0.388395	-0.903614	0.148358	0.175419	-0.23642	0.233833	0.0134763	0.555953	-0.409551	-0.244055	0.0459635	-0.522406	-0.513484	0.207056	-0.173814	0.190763	-0.244616	0.0753532	-0.311296	-0.496937	0.237134	-0.467533	-0.329391	-0.364703	0.0702663	-0.159359	0.0513705	0.0454548	-0.108873	-0.363268	-0.490044	-0.337879	-0.361044	0.0442643	-0.345548	0.0610987	-0.0308753	0.0902575	-0.235424	-0.441284	-0.91	-0.250464	-0.486565	0.109597	-0.701003	-0.409875	-0.602353	-0.489965	0.344286
-4.90956	-0.389822	-0.903103	0.147268	0.173542	-0.235959	0.234083	0.0118231	0.554238	-0.411156	-0.244338	0.0477705	-0.523041	-0.514451	0.206919	-0.17405	0.189089	-0.24435	0.0736365	-0.31157	-0.496912	0.235083	-0.46787	-0.329631	-0.363535	0.0697474	-0.160181	0.0509922	0.0460085	-0.109423	-0.36435	-0.491103	-0.336805	-0.359323	0.0447316	-0.34532	0.0621475	-0.0308177	0.0890588	-0.237195	-0.441271	-0.910226	-0.25117	-0.486194	0.109385	-0.701448	-0.40907	-0.602411	-0.49025	0.344486
-4.90858	-0.39125	-0.9026	0.146178	0.171658	-0.235498	0.234323	0.0101726	0.552529	-0.412752	-0.244628	0.0495794	-0.523679	-0.515413	0.206779	-0.174284	0.187404	-0.244081	0.0719243	-0.31184	-0.496881	0.233034	-0.468201	-0.329858	-0.362359	0.0692292	-0.160997	0.0506087	0.0465552	-0.109971	-0.365422	-0.492159	-0.335729	-0.357592	0.0452072	-0.345093	0.0631958	-0.0307623	0.0878567	-0.238973	-0.441257	-0.910444	-0.251879	-0.485827	0.109162	-0.701889	-0.408255	-0.602467	-0.49053	0.344693
-4.90759	-0.392678	-0.902105	0.145089	0.169767	-0.235039	0.234552	0.00852493	0.550825	-0.414338	-0.244926	0.05139	-0.52432	-0.516372	0.206637	-0.174517	0.185711	-0.243811	0.0702167	-0.312105	-0.496843	0.230986	-0.468527	-0.330071	-0.361176	0.0687116	-0.161805	0.0502199	0.0470951	-0.11052	-0.366483	-0.493214	-0.334653	-0.355852	0.0456911	-0.344867	0.0642437	-0.0307093	0.0866512	-0.240757	-0.441243	-0.910654	-0.252591	-0.485465	0.108927	-0.702327	-0.40743	-0.602521	-0.490806	0.344905
-4.90661	-0.394107	-0.901618	0.144	0.167869	-0.234582	0.23477	0.00688019	0.549128	-0.415913	-0.24523	0.0532022	-0.524964	-0.517326	0.206492	-0.174748	0.184008	-0.243537	0.068514	-0.312364	-0.496799	0.228939	-0.468847	-0.330271	-0.359985	0.0681946	-0.162607	0.0498259	0.0476281	-0.111067	-0.367534	-0.494268	-0.333576	-0.354103	0.0461832	-0.344641	0.0652912	-0.0306586	0.0854425	-0.242549	-0.441228	-0.910854	-0.253305	-0.485107	0.108682	-0.702762	-0.406594	-0.602572	-0.491077	0.345123
-4.90563	-0.395535	-0.901139	0.142912	0.165965	-0.234126	0.234978	0.00523861	0.547436	-0.417479	-0.245543	0.055016	-0.525611	-0.518276	0.206346	-0.174977	0.182295	-0.243261	0.0668161	-0.312619	-0.496749	0.226894	-0.469162	-0.330458	-0.358786	0.0676782	-0.163401	0.0494267	0.0481543	-0.111614	-0.368574	-0.495319	-0.332498	-0.352345	0.0466834	-0.344416	0.0663383	-0.0306102	0.0842308	-0.244348	-0.441213	-0.911046	-0.254021	-0.484753	0.108426	-0.703194	-0.405748	-0.602621	-0.491344	0.345348
-4.90465	-0.396964	-0.900669	0.141824	0.164054	-0.233671	0.235175	0.00360036	0.54575	-0.419034	-0.245862	0.0568312	-0.526261	-0.519222	0.206198	-0.175204	0.180574	-0.242983	0.0651232	-0.312868	-0.496692	0.224851	-0.469471	-0.330632	-0.357581	0.0671623	-0.164188	0.0490223	0.0486739	-0.11216	-0.369604	-0.496368	-0.33142	-0.350578	0.0471918	-0.344191	0.0673851	-0.030564	0.0830163	-0.246154	-0.441197	-0.911229	-0.25474	-0.484404	0.108159	-0.703623	-0.404891	-0.602668	-0.491606	0.345578
-4.90366	-0.398393	-0.900207	0.140738	0.162138	-0.233218	0.235362	0.00196562	0.544071	-0.420579	-0.246189	0.0586477	-0.526914	-0.520163	0.206048	-0.17543	0.178843	-0.242702	0.0634353	-0.313112	-0.496629	0.222809	-0.469775	-0.330792	-0.356367	0.066647	-0.164969	0.0486127	0.0491868	-0.112705	-0.370623	-0.497415	-0.330342	-0.348803	0.0477083	-0.343968	0.0684315	-0.03052	0.0817992	-0.247966	-0.441181	-0.911403	-0.255461	-0.484059	0.107881	-0.704049	-0.404024	-0.602712	-0.491863	0.345815
-4.90268	-0.399822	-0.899754	0.139652	0.160215	-0.232768	0.235539	0.000334563	0.542397	-0.422113	-0.246522	0.0604654	-0.527569	-0.5211	0.205897	-0.175654	0.177104	-0.242419	0.0617527	-0.313351	-0.496559	0.220769	-0.470074	-0.330938	-0.355147	0.0661322	-0.165741	0.0481981	0.0496931	-0.11325	-0.371632	-0.49846	-0.329263	-0.347019	0.0482328	-0.343745	0.0694775	-0.0304782	0.0805795	-0.249785	-0.441165	-0.911568	-0.256185	-0.483719	0.107592	-0.704471	-0.403146	-0.602755	-0.492116	0.346057
-4.9017	-0.401251	-0.899309	0.138568	0.158286	-0.232319	0.235705	-0.00129263	0.54073	-0.423637	-0.246863	0.0622842	-0.528228	-0.522033	0.205744	-0.175875	0.175356	-0.242133	0.0600754	-0.313584	-0.496484	0.218731	-0.470367	-0.331071	-0.353919	0.0656179	-0.166507	0.0477783	0.0501928	-0.113793	-0.37263	-0.499502	-0.328185	-0.345226	0.0487653	-0.343523	0.0705231	-0.0304385	0.0793574	-0.251611	-0.441148	-0.911724	-0.256912	-0.483383	0.107293	-0.70489	-0.402258	-0.602795	-0.492364	0.346305
-4.90071	-0.40268	-0.898872	0.137485	0.156351	-0.231871	0.23586	-0.00291579	0.539069	-0.425149	-0.24721	0.0641041	-0.52889	-0.522962	0.20559	-0.176094	0.173599	-0.241845	0.0584034	-0.313811	-0.496401	0.216695	-0.470654	-0.331191	-0.352684	0.065104	-0.167265	0.0473535	0.0506861	-0.114335	-0.373618	-0.500543	-0.327107	-0.343426	0.0493057	-0.343301	0.0715685	-0.030401	0.0781331	-0.253443	-0.441132	-0.911872	-0.257641	-0.483052	0.106982	-0.705306	-0.40136	-0.602833	-0.492607	0.346559
-4.89973	-0.404109	-0.898444	0.136403	0.154411	-0.231426	0.236005	-0.00453473	0.537413	-0.42665	-0.247565	0.0659249	-0.529555	-0.523886	0.205435	-0.176311	0.171834	-0.241554	0.056737	-0.314033	-0.496313	0.214661	-0.470936	-0.331297	-0.351441	0.0645906	-0.168015	0.0469236	0.051173	-0.114876	-0.374596	-0.501581	-0.32603	-0.341617	0.0498541	-0.343081	0.0726134	-0.0303657	0.0769069	-0.255281	-0.441115	-0.912011	-0.258373	-0.482725	0.106661	-0.705718	-0.400451	-0.602869	-0.492845	0.346819
-4.89875	-0.405537	-0.898025	0.135323	0.152465	-0.230983	0.236139	-0.00614929	0.535764	-0.428141	-0.247926	0.0677464	-0.530223	-0.524806	0.205279	-0.176526	0.170061	-0.241261	0.0550761	-0.314248	-0.496218	0.212629	-0.471213	-0.331389	-0.350191	0.0640776	-0.168758	0.0464887	0.0516535	-0.115416	-0.375564	-0.502617	-0.324953	-0.339801	0.0504102	-0.342861	0.0736581	-0.0303324	0.0756787	-0.257126	-0.441099	-0.91214	-0.259108	-0.482403	0.106329	-0.706127	-0.399531	-0.602903	-0.493079	0.347085
-4.89776	-0.406964	-0.897615	0.134245	0.150514	-0.230542	0.236263	-0.0077593	0.534121	-0.429619	-0.248294	0.0695687	-0.530894	-0.525721	0.205121	-0.176738	0.16828	-0.240965	0.053421	-0.314458	-0.496117	0.210599	-0.471484	-0.331468	-0.348934	0.063565	-0.169493	0.0460488	0.0521277	-0.115954	-0.376521	-0.50365	-0.323878	-0.337977	0.0509742	-0.342642	0.0747025	-0.0303012	0.0744489	-0.258977	-0.441082	-0.912261	-0.259845	-0.482086	0.105987	-0.706532	-0.398601	-0.602934	-0.493307	0.347356
-4.89678	-0.408391	-0.897213	0.133168	0.148557	-0.230104	0.236377	-0.00936457	0.532485	-0.431087	-0.248669	0.0713915	-0.531568	-0.526632	0.204964	-0.176948	0.16649	-0.240667	0.0517717	-0.314662	-0.49601	0.208572	-0.47175	-0.331533	-0.34767	0.0630527	-0.170221	0.045604	0.0525957	-0.116491	-0.377469	-0.504681	-0.322803	-0.336146	0.0515459	-0.342424	0.0757465	-0.030272	0.0732175	-0.260834	-0.441065	-0.912373	-0.260586	-0.481773	0.105633	-0.706933	-0.39766	-0.602964	-0.493531	0.347633
-4.8958	-0.409817	-0.896821	0.132094	0.146595	-0.229667	0.23648	-0.010965	0.530854	-0.432543	-0.24905	0.0732148	-0.532244	-0.527538	0.204805	-0.177155	0.164693	-0.240367	0.0501282	-0.31486	-0.495897	0.206547	-0.47201	-0.331584	-0.346399	0.0625408	-0.170941	0.0451542	0.0530575	-0.117026	-0.378407	-0.505709	-0.321729	-0.334308	0.0521252	-0.342206	0.0767903	-0.0302449	0.0719847	-0.262697	-0.441049	-0.912476	-0.261329	-0.481466	0.105269	-0.707332	-0.396709	-0.602992	-0.49375	0.347916
-4.89481	-0.411243	-0.896437	0.131021	0.144628	-0.229234	0.236573	-0.0125603	0.52923	-0.433986	-0.249438	0.0750385	-0.532924	-0.528439	0.204646	-0.177359	0.162888	-0.240064	0.0484907	-0.315051	-0.495778	0.204525	-0.472265	-0.331622	-0.34512	0.0620292	-0.171653	0.0446996	0.0535133	-0.11756	-0.379334	-0.506735	-0.320657	-0.332463	0.0527121	-0.34199	0.0778337	-0.0302198	0.0707508	-0.264566	-0.441033	-0.91257	-0.262075	-0.481163	0.104895	-0.707726	-0.395747	-0.603017	-0.493963	0.348204
-4.89383	-0.412667	-0.896062	0.129951	0.142657	-0.228802	0.236655	-0.0141503	0.527612	-0.435418	-0.249833	0.0768625	-0.533608	-0.529337	0.204487	-0.17756	0.161075	-0.239758	0.0468593	-0.315236	-0.495652	0.202506	-0.472515	-0.331645	-0.343835	0.0615179	-0.172357	0.04424	0.053963	-0.118092	-0.380252	-0.507758	-0.319586	-0.33061	0.0533066	-0.341774	0.078877	-0.0301966	0.0695158	-0.266441	-0.441017	-0.912654	-0.262824	-0.480864	0.10451	-0.708116	-0.394775	-0.603041	-0.494172	0.348498
-4.89285	-0.414091	-0.895697	0.128883	0.140681	-0.228373	0.236727	-0.015735	0.526001	-0.436838	-0.250233	0.0786867	-0.534294	-0.530229	0.204328	-0.177759	0.159255	-0.23945	0.045234	-0.315415	-0.49552	0.20049	-0.472759	-0.331655	-0.342543	0.0610069	-0.173053	0.0437757	0.0544067	-0.118622	-0.38116	-0.508779	-0.318517	-0.328752	0.0539086	-0.341559	0.0799199	-0.0301753	0.0682799	-0.268321	-0.441001	-0.91273	-0.263576	-0.480571	0.104114	-0.708503	-0.393791	-0.603062	-0.494375	0.348798
-4.89187	-0.415513	-0.89534	0.127817	0.1387	-0.227947	0.236788	-0.0173141	0.524395	-0.438246	-0.25064	0.0805109	-0.534983	-0.531117	0.204168	-0.177954	0.157428	-0.239139	0.043615	-0.315587	-0.495383	0.198476	-0.472998	-0.331651	-0.341243	0.0604961	-0.173741	0.0433065	0.0548446	-0.119151	-0.382058	-0.509796	-0.317449	-0.326886	0.054518	-0.341345	0.0809626	-0.030156	0.0670434	-0.270207	-0.440986	-0.912797	-0.264331	-0.480282	0.103708	-0.708886	-0.392798	-0.603082	-0.494573	0.349103
-4.89088	-0.416934	-0.894993	0.126754	0.136714	-0.227523	0.236839	-0.0188875	0.522796	-0.439642	-0.251053	0.082335	-0.535675	-0.532	0.204009	-0.178147	0.155594	-0.238826	0.0420022	-0.315752	-0.495239	0.196465	-0.473232	-0.331633	-0.339937	0.0599856	-0.174422	0.0428326	0.0552766	-0.119678	-0.382947	-0.510811	-0.316384	-0.325015	0.0551347	-0.341131	0.082005	-0.0301386	0.0658063	-0.272099	-0.440971	-0.912855	-0.265089	-0.479998	0.103292	-0.709265	-0.391793	-0.603099	-0.494766	0.349414
-4.8899	-0.418354	-0.894654	0.125693	0.134725	-0.227102	0.23688	-0.0204549	0.521204	-0.441025	-0.251473	0.084159	-0.53637	-0.532879	0.203849	-0.178336	0.153752	-0.238511	0.0403959	-0.315911	-0.49509	0.194458	-0.47346	-0.331602	-0.338624	0.0594752	-0.175094	0.0423539	0.0557029	-0.120202	-0.383826	-0.511823	-0.31532	-0.323137	0.0557587	-0.340919	0.0830472	-0.0301231	0.0645688	-0.273996	-0.440957	-0.912903	-0.26585	-0.47972	0.102865	-0.709641	-0.390779	-0.603114	-0.494954	0.34973
-4.88892	-0.419772	-0.894325	0.124635	0.132731	-0.226683	0.23691	-0.0220164	0.519617	-0.442395	-0.251898	0.0859827	-0.537069	-0.533753	0.20369	-0.178522	0.151904	-0.238193	0.0387961	-0.316063	-0.494934	0.192453	-0.473683	-0.331556	-0.337304	0.0589651	-0.175757	0.0418706	0.0561235	-0.120725	-0.384695	-0.512832	-0.31426	-0.321254	0.0563898	-0.340707	0.0840892	-0.0301093	0.0633312	-0.275899	-0.440943	-0.912943	-0.266615	-0.479446	0.102428	-0.710012	-0.389753	-0.603128	-0.495137	0.350051
-4.88793	-0.421189	-0.894006	0.123581	0.130734	-0.226268	0.23693	-0.0235715	0.518038	-0.443753	-0.25233	0.0878061	-0.53777	-0.534622	0.203532	-0.178704	0.150049	-0.237872	0.0372029	-0.316208	-0.494773	0.190452	-0.473901	-0.331496	-0.335977	0.0584551	-0.176413	0.0413826	0.0565385	-0.121245	-0.385555	-0.513838	-0.313201	-0.319365	0.0570281	-0.340496	0.085131	-0.0300974	0.0620936	-0.277807	-0.44093	-0.912973	-0.267382	-0.479177	0.10198	-0.710379	-0.388717	-0.603139	-0.495314	0.350378
-4.88695	-0.422604	-0.893695	0.122529	0.128732	-0.225855	0.236939	-0.0251203	0.516464	-0.445097	-0.252767	0.089629	-0.538475	-0.535486	0.203374	-0.178883	0.148188	-0.237549	0.0356162	-0.316346	-0.494606	0.188454	-0.474113	-0.331423	-0.334644	0.0579452	-0.17706	0.04089	0.056948	-0.121763	-0.386405	-0.514841	-0.312145	-0.31747	0.0576735	-0.340285	0.0861725	-0.0300873	0.0608561	-0.279719	-0.440918	-0.912994	-0.268153	-0.478913	0.101522	-0.710742	-0.38767	-0.603149	-0.495486	0.35071
-4.88597	-0.424018	-0.893394	0.12148	0.126727	-0.225446	0.236938	-0.0266626	0.514897	-0.446429	-0.25321	0.0914513	-0.539182	-0.536346	0.203217	-0.179059	0.14632	-0.237223	0.0340363	-0.316478	-0.494433	0.18646	-0.474321	-0.331335	-0.333304	0.0574355	-0.177699	0.0403927	0.057352	-0.122279	-0.387246	-0.515841	-0.311092	-0.315571	0.0583258	-0.340076	0.0872139	-0.030079	0.059619	-0.281637	-0.440906	-0.913006	-0.268927	-0.478654	0.101054	-0.711101	-0.386613	-0.603156	-0.495653	0.351047
-4.88498	-0.425429	-0.893103	0.120435	0.124718	-0.225039	0.236927	-0.0281981	0.513337	-0.447748	-0.253659	0.0932729	-0.539893	-0.5372	0.20306	-0.179231	0.144446	-0.236895	0.0324632	-0.316601	-0.494254	0.184469	-0.474523	-0.331233	-0.331957	0.0569259	-0.17833	0.039891	0.0577506	-0.122792	-0.388078	-0.516838	-0.310042	-0.313666	0.058985	-0.339867	0.0882551	-0.0300724	0.0583823	-0.28356	-0.440896	-0.913009	-0.269704	-0.4784	0.100576	-0.711456	-0.385545	-0.603162	-0.495814	0.351389
-4.884	-0.426839	-0.892821	0.119393	0.122706	-0.224636	0.236905	-0.0297268	0.511783	-0.449053	-0.254113	0.0950937	-0.540607	-0.53805	0.202905	-0.179399	0.142567	-0.236565	0.030897	-0.316718	-0.49407	0.182482	-0.47472	-0.331117	-0.330604	0.0564163	-0.178952	0.0393847	0.0581439	-0.123303	-0.388901	-0.517831	-0.308995	-0.311756	0.0596511	-0.339659	0.0892961	-0.0300675	0.0571464	-0.285488	-0.440886	-0.913003	-0.270484	-0.478151	0.100087	-0.711807	-0.384466	-0.603165	-0.49597	0.351737
-4.88302	-0.428246	-0.892549	0.118354	0.120691	-0.224236	0.236873	-0.0312484	0.510235	-0.450345	-0.254573	0.0969136	-0.541324	-0.538895	0.202751	-0.179563	0.140681	-0.236232	0.0293377	-0.316827	-0.49388	0.180498	-0.474912	-0.330987	-0.329244	0.0559068	-0.179565	0.0388739	0.0585319	-0.123811	-0.389714	-0.518821	-0.307951	-0.309841	0.0603238	-0.339452	0.0903369	-0.0300642	0.0559112	-0.28742	-0.440877	-0.912988	-0.271268	-0.477907	0.0995888	-0.712154	-0.383377	-0.603167	-0.49612	0.35209
-4.88204	-0.429651	-0.892286	0.117319	0.118672	-0.223838	0.236831	-0.0327629	0.508694	-0.451624	-0.255039	0.0987325	-0.542044	-0.539736	0.202598	-0.179724	0.138789	-0.235896	0.0277854	-0.316929	-0.493684	0.178519	-0.475099	-0.330843	-0.327878	0.0553973	-0.18017	0.0383588	0.0589148	-0.124317	-0.390519	-0.519808	-0.306911	-0.307922	0.0610032	-0.339246	0.0913776	-0.0300627	0.0546771	-0.289357	-0.440869	-0.912963	-0.272055	-0.477668	0.0990802	-0.712496	-0.382277	-0.603167	-0.496265	0.352447
-4.88105	-0.431054	-0.892033	0.116288	0.116651	-0.223445	0.236778	-0.0342701	0.507159	-0.452888	-0.255509	0.10055	-0.542767	-0.540571	0.202446	-0.17988	0.136892	-0.235558	0.0262401	-0.317023	-0.493483	0.176543	-0.475281	-0.330685	-0.326505	0.0548878	-0.180767	0.0378392	0.0592926	-0.12482	-0.391315	-0.520792	-0.305874	-0.305998	0.0616892	-0.33904	0.0924181	-0.0300627	0.0534442	-0.291298	-0.440862	-0.91293	-0.272845	-0.477434	0.0985616	-0.712833	-0.381167	-0.603165	-0.496404	0.35281
-4.88007	-0.432455	-0.89179	0.115261	0.114627	-0.223054	0.236715	-0.0357697	0.505631	-0.454139	-0.255986	0.102367	-0.543493	-0.541401	0.202296	-0.180033	0.134989	-0.235218	0.024702	-0.31711	-0.493276	0.174571	-0.475458	-0.330513	-0.325126	0.0543783	-0.181354	0.0373153	0.0596654	-0.12532	-0.392101	-0.521772	-0.304841	-0.304071	0.0623816	-0.338835	0.0934584	-0.0300644	0.0522127	-0.293244	-0.440856	-0.912887	-0.273639	-0.477206	0.0980329	-0.713167	-0.380046	-0.603161	-0.496538	0.353177
-4.87909	-0.433853	-0.891556	0.114238	0.1126	-0.222667	0.236642	-0.0372618	0.504109	-0.455377	-0.256467	0.104182	-0.544222	-0.542226	0.202147	-0.180181	0.133081	-0.234875	0.023171	-0.317189	-0.493063	0.172604	-0.475629	-0.330326	-0.323741	0.0538688	-0.181933	0.036787	0.0600332	-0.125817	-0.392879	-0.522748	-0.303812	-0.302139	0.0630804	-0.338631	0.0944987	-0.0300676	0.0509827	-0.295194	-0.440852	-0.912835	-0.274436	-0.476982	0.0974944	-0.713496	-0.378914	-0.603155	-0.496667	0.35355
-4.8781	-0.435248	-0.891332	0.113219	0.110571	-0.222283	0.236558	-0.038746	0.502594	-0.4566	-0.256953	0.105996	-0.544955	-0.543047	0.202	-0.180325	0.131168	-0.234529	0.0216474	-0.31726	-0.492846	0.17064	-0.475796	-0.330126	-0.322349	0.0533593	-0.182503	0.0362545	0.0603962	-0.126311	-0.393648	-0.523721	-0.302786	-0.300204	0.0637855	-0.338428	0.0955388	-0.0300724	0.0497545	-0.297148	-0.440848	-0.912773	-0.275237	-0.476764	0.096946	-0.71382	-0.377772	-0.603147	-0.496789	0.353927
-4.87712	-0.436641	-0.891118	0.112204	0.108539	-0.221903	0.236464	-0.0402223	0.501086	-0.457809	-0.257445	0.107808	-0.54569	-0.543862	0.201855	-0.180464	0.12925	-0.234182	0.020131	-0.317323	-0.492623	0.168681	-0.475958	-0.329911	-0.320951	0.0528496	-0.183065	0.0357178	0.0607545	-0.126803	-0.394409	-0.52469	-0.301765	-0.298265	0.0644968	-0.338225	0.0965788	-0.0300787	0.0485281	-0.299106	-0.440846	-0.912703	-0.276041	-0.47655	0.0963878	-0.71414	-0.37662	-0.603137	-0.496906	0.354309
-4.87614	-0.43803	-0.890914	0.111193	0.106505	-0.221526	0.23636	-0.0416905	0.499584	-0.459004	-0.257941	0.109618	-0.546429	-0.544673	0.201712	-0.1806	0.127327	-0.233831	0.018622	-0.317379	-0.492394	0.166727	-0.476115	-0.329682	-0.319547	0.0523399	-0.183617	0.0351769	0.061108	-0.127291	-0.395161	-0.525655	-0.300749	-0.296322	0.0652142	-0.338023	0.0976186	-0.0300865	0.0473038	-0.301068	-0.440846	-0.912623	-0.276848	-0.476342	0.0958198	-0.714455	-0.375457	-0.603125	-0.497017	0.354696
-4.87515	-0.439417	-0.89072	0.110187	0.104469	-0.221153	0.236245	-0.0431505	0.498088	-0.460184	-0.258442	0.111427	-0.54717	-0.545478	0.201571	-0.18073	0.1254	-0.233478	0.0171204	-0.317426	-0.49216	0.164777	-0.476268	-0.329438	-0.318137	0.0518301	-0.184161	0.0346319	0.061457	-0.127775	-0.395904	-0.526617	-0.299736	-0.294377	0.0659376	-0.337822	0.0986584	-0.0300958	0.0460818	-0.303034	-0.440846	-0.912534	-0.277659	-0.47614	0.0952422	-0.714766	-0.374283	-0.603112	-0.497123	0.355087
-4.87417	-0.440801	-0.890536	0.109185	0.102431	-0.220783	0.23612	-0.0446022	0.4966	-0.46135	-0.258948	0.113234	-0.547915	-0.546278	0.201432	-0.180856	0.123468	-0.233123	0.0156262	-0.317465	-0.491921	0.162831	-0.476415	-0.329181	-0.31672	0.0513201	-0.184695	0.0340827	0.0618014	-0.128257	-0.396639	-0.527575	-0.298729	-0.292428	0.0666669	-0.337621	0.0996981	-0.0301065	0.0448622	-0.305003	-0.440849	-0.912436	-0.278474	-0.475942	0.0946548	-0.715072	-0.373099	-0.603097	-0.497223	0.355483
-4.87319	-0.442181	-0.890362	0.108188	0.100391	-0.220417	0.235985	-0.0460453	0.495117	-0.462502	-0.259458	0.115039	-0.548663	-0.547073	0.201295	-0.180978	0.121531	-0.232765	0.0141396	-0.317496	-0.491677	0.16089	-0.476558	-0.328909	-0.315298	0.05081	-0.185221	0.0335295	0.0621413	-0.128735	-0.397366	-0.528528	-0.297726	-0.290477	0.067402	-0.337422	0.100738	-0.0301186	0.0436452	-0.306976	-0.440852	-0.912328	-0.279292	-0.475749	0.0940578	-0.715373	-0.371905	-0.603079	-0.497317	0.355883
-4.8722	-0.443558	-0.890198	0.107196	0.0983502	-0.220055	0.23584	-0.0474797	0.493642	-0.463638	-0.259973	0.116842	-0.549414	-0.547863	0.201161	-0.181094	0.119591	-0.232404	0.0126606	-0.317519	-0.491428	0.158954	-0.476696	-0.328623	-0.31387	0.0502997	-0.185737	0.0329723	0.0624769	-0.129209	-0.398084	-0.529478	-0.296728	-0.288523	0.0681429	-0.337222	0.101777	-0.0301321	0.0424309	-0.308952	-0.440858	-0.912212	-0.280114	-0.475562	0.0934513	-0.71567	-0.3707	-0.60306	-0.497405	0.356288
-4.87122	-0.444932	-0.890045	0.106209	0.0963075	-0.219696	0.235684	-0.0489053	0.492173	-0.46476	-0.260493	0.118642	-0.550168	-0.548648	0.201029	-0.181206	0.117646	-0.232042	0.0111892	-0.317533	-0.491174	0.157022	-0.476829	-0.328323	-0.312436	0.0497892	-0.186245	0.0324112	0.0628083	-0.12968	-0.398794	-0.530424	-0.295735	-0.286567	0.0688893	-0.337024	0.102817	-0.030147	0.0412197	-0.310932	-0.440865	-0.912086	-0.280939	-0.47538	0.0928353	-0.715962	-0.369484	-0.603039	-0.497488	0.356698
-4.87024	-0.446302	-0.889901	0.105226	0.0942635	-0.219341	0.235519	-0.050322	0.49071	-0.465867	-0.261016	0.12044	-0.550925	-0.549428	0.2009	-0.181312	0.115698	-0.231676	0.00972539	-0.317539	-0.490914	0.155096	-0.476958	-0.328008	-0.310996	0.0492785	-0.186743	0.0318462	0.0631354	-0.130147	-0.399496	-0.531366	-0.294747	-0.284608	0.0696413	-0.336826	0.103856	-0.0301632	0.0400115	-0.312914	-0.440874	-0.91195	-0.281768	-0.475203	0.0922099	-0.716249	-0.368259	-0.603017	-0.497565	0.357111
-4.86926	-0.447669	-0.889768	0.104249	0.0922183	-0.21899	0.235343	-0.0517296	0.489255	-0.466959	-0.261544	0.122236	-0.551685	-0.550202	0.200774	-0.181414	0.113746	-0.231308	0.00826932	-0.317536	-0.49065	0.153174	-0.477082	-0.327679	-0.30955	0.0487677	-0.187232	0.0312772	0.0634584	-0.130611	-0.400191	-0.532303	-0.293764	-0.282648	0.0703986	-0.336629	0.104895	-0.0301807	0.0388067	-0.3149	-0.440885	-0.911806	-0.2826	-0.475032	0.091575	-0.71653	-0.367023	-0.602992	-0.497635	0.357529
-4.86827	-0.449031	-0.889644	0.103277	0.0901721	-0.218643	0.235156	-0.053128	0.487805	-0.468036	-0.262076	0.12403	-0.552448	-0.550972	0.200651	-0.181511	0.11179	-0.230938	0.006821	-0.317525	-0.490381	0.151258	-0.477202	-0.327336	-0.308099	0.0482565	-0.187712	0.0307045	0.0637774	-0.131071	-0.400877	-0.533237	-0.292787	-0.280685	0.0711612	-0.336432	0.105935	-0.0301995	0.0376053	-0.316888	-0.440897	-0.911652	-0.283436	-0.474865	0.0909309	-0.716807	-0.365776	-0.602966	-0.4977	0.357951
-4.86729	-0.45039	-0.889532	0.102311	0.0881251	-0.2183	0.23496	-0.0545171	0.486363	-0.469098	-0.262612	0.12582	-0.553214	-0.551736	0.200531	-0.181602	0.109831	-0.230565	0.00538046	-0.317505	-0.490107	0.149347	-0.477317	-0.326979	-0.306642	0.0477451	-0.188183	0.030128	0.0640924	-0.131527	-0.401555	-0.534166	-0.291816	-0.278721	0.0719291	-0.336236	0.106974	-0.0302195	0.0364076	-0.318879	-0.440911	-0.91149	-0.284276	-0.474704	0.0902774	-0.717079	-0.36452	-0.602938	-0.497759	0.358378
-4.86631	-0.451745	-0.889429	0.101349	0.0860774	-0.217961	0.234753	-0.0558966	0.484927	-0.470144	-0.263152	0.127608	-0.553984	-0.552495	0.200414	-0.181688	0.107869	-0.23019	0.00394774	-0.317477	-0.489828	0.147441	-0.477428	-0.326608	-0.305179	0.0472335	-0.188645	0.0295478	0.0644036	-0.131979	-0.402226	-0.53509	-0.29085	-0.276756	0.072702	-0.336041	0.108013	-0.0302407	0.0352138	-0.320873	-0.440928	-0.911317	-0.28512	-0.474549	0.0896148	-0.717346	-0.363253	-0.602908	-0.497813	0.358808
-4.86532	-0.453096	-0.889337	0.100393	0.0840291	-0.217626	0.234536	-0.0572665	0.483498	-0.471175	-0.263696	0.129393	-0.554756	-0.553248	0.2003	-0.181768	0.105903	-0.229812	0.00252287	-0.317439	-0.489545	0.14554	-0.477534	-0.326222	-0.303711	0.0467215	-0.189097	0.028964	0.064711	-0.132426	-0.402889	-0.53601	-0.289891	-0.274789	0.0734798	-0.335846	0.109052	-0.0302632	0.034024	-0.322869	-0.440946	-0.911136	-0.285967	-0.474398	0.088943	-0.717608	-0.361976	-0.602876	-0.49786	0.359242
-4.86434	-0.454442	-0.889255	0.0994434	0.0819804	-0.217294	0.234309	-0.0586267	0.482075	-0.47219	-0.264243	0.131175	-0.555531	-0.553997	0.200189	-0.181843	0.103935	-0.229432	0.00110589	-0.317393	-0.489256	0.143645	-0.477637	-0.325822	-0.302238	0.0462093	-0.18954	0.0283765	0.0650147	-0.13287	-0.403545	-0.536926	-0.288937	-0.272821	0.0742625	-0.335652	0.110092	-0.0302868	0.0328384	-0.324868	-0.440967	-0.910945	-0.286817	-0.474253	0.0882621	-0.717865	-0.360688	-0.602842	-0.497901	0.359681
-4.86336	-0.455784	-0.889184	0.0984989	0.0799315	-0.216967	0.234072	-0.059977	0.48066	-0.47319	-0.264794	0.132954	-0.55631	-0.55474	0.200082	-0.181913	0.101964	-0.229049	-0.000303168	-0.317338	-0.488964	0.141756	-0.477734	-0.325407	-0.300759	0.0456967	-0.189973	0.0277854	0.0653149	-0.13331	-0.404193	-0.537837	-0.287989	-0.270853	0.07505	-0.335459	0.111131	-0.0303116	0.0316571	-0.326869	-0.44099	-0.910746	-0.287672	-0.474113	0.0875722	-0.718116	-0.359391	-0.602806	-0.497936	0.360123
-4.86237	-0.457122	-0.889123	0.0975604	0.0778825	-0.216644	0.233825	-0.0613173	0.47925	-0.474174	-0.265348	0.13473	-0.557091	-0.555477	0.199978	-0.181977	0.0999905	-0.228664	-0.00170428	-0.317273	-0.488666	0.139872	-0.477828	-0.324979	-0.299275	0.0451839	-0.190397	0.0271909	0.0656115	-0.133745	-0.404834	-0.538743	-0.287048	-0.268883	0.0758421	-0.335266	0.11217	-0.0303375	0.0304804	-0.328871	-0.441015	-0.910537	-0.28853	-0.473978	0.0868733	-0.718363	-0.358083	-0.602769	-0.497965	0.360569
-4.86139	-0.458455	-0.889072	0.0966277	0.0758335	-0.216325	0.233567	-0.0626474	0.477848	-0.475142	-0.265906	0.136503	-0.557876	-0.55621	0.199878	-0.182035	0.0980146	-0.228276	-0.00309742	-0.3172	-0.488365	0.137994	-0.477918	-0.324536	-0.297785	0.0446706	-0.190811	0.0265929	0.0659047	-0.134175	-0.405468	-0.539645	-0.286113	-0.266913	0.0766387	-0.335073	0.113209	-0.0303644	0.0293084	-0.330876	-0.441042	-0.910318	-0.289392	-0.473848	0.0861655	-0.718604	-0.356765	-0.60273	-0.497989	0.361018
-4.86041	-0.459783	-0.889032	0.0957011	0.0737848	-0.21601	0.233299	-0.0639673	0.476452	-0.476095	-0.266467	0.138272	-0.558663	-0.556937	0.199782	-0.182087	0.0960364	-0.227886	-0.00448256	-0.317117	-0.488058	0.136122	-0.478003	-0.324079	-0.29629	0.044157	-0.191216	0.0259914	0.0661946	-0.134602	-0.406094	-0.540542	-0.285184	-0.264943	0.0774397	-0.334881	0.114248	-0.0303924	0.0281414	-0.332882	-0.441071	-0.910091	-0.290258	-0.473724	0.0854489	-0.718839	-0.355437	-0.602689	-0.498006	0.361472
-4.85943	-0.461106	-0.889003	0.0947807	0.0717364	-0.215699	0.233022	-0.0652767	0.475063	-0.477031	-0.267031	0.140038	-0.559454	-0.557658	0.199689	-0.182134	0.0940562	-0.227493	-0.00585968	-0.317026	-0.487748	0.134255	-0.478084	-0.323607	-0.294791	0.0436431	-0.191612	0.0253867	0.0664812	-0.135024	-0.406713	-0.541434	-0.284262	-0.262973	0.078245	-0.334689	0.115288	-0.0304215	0.0269794	-0.33489	-0.441104	-0.909854	-0.291127	-0.473605	0.0847235	-0.71907	-0.3541	-0.602646	-0.498017	0.361929
-4.85844	-0.462425	-0.888984	0.0938664	0.0696885	-0.215392	0.232734	-0.0665757	0.473681	-0.477951	-0.267599	0.1418	-0.560248	-0.558374	0.199601	-0.182174	0.092074	-0.227098	-0.00722875	-0.316925	-0.487433	0.132395	-0.478162	-0.323122	-0.293286	0.0431287	-0.191998	0.0247786	0.0667647	-0.135441	-0.407326	-0.542322	-0.283347	-0.261003	0.0790544	-0.334498	0.116327	-0.0304516	0.0258227	-0.3369	-0.441138	-0.909609	-0.292	-0.473491	0.0839893	-0.719295	-0.352752	-0.602602	-0.498022	0.362389
-4.85746	-0.463738	-0.888976	0.0929585	0.0676413	-0.21509	0.232436	-0.067864	0.472305	-0.478855	-0.268169	0.143558	-0.561044	-0.559085	0.199516	-0.182209	0.09009	-0.226701	-0.00858976	-0.316814	-0.487114	0.13054	-0.478235	-0.322622	-0.291776	0.0426139	-0.192374	0.0241673	0.0670451	-0.135853	-0.407931	-0.543204	-0.282439	-0.259033	0.0798678	-0.334308	0.117366	-0.0304826	0.0246714	-0.33891	-0.441175	-0.909354	-0.292877	-0.473382	0.0832465	-0.719514	-0.351394	-0.602555	-0.498021	0.362853
-4.85648	-0.465046	-0.888979	0.092057	0.0655948	-0.214792	0.232127	-0.0691416	0.470936	-0.479743	-0.268742	0.145313	-0.561844	-0.55979	0.199436	-0.182237	0.0881044	-0.226301	-0.00994269	-0.316694	-0.486791	0.128692	-0.478305	-0.322108	-0.290261	0.0420988	-0.192741	0.0235528	0.0673225	-0.136261	-0.40853	-0.544081	-0.281538	-0.257064	0.0806852	-0.334118	0.118405	-0.0305146	0.0235257	-0.340922	-0.441215	-0.90909	-0.293757	-0.473279	0.0824951	-0.719728	-0.350027	-0.602507	-0.498013	0.36332
-4.85549	-0.466349	-0.888992	0.091162	0.0635494	-0.214497	0.231809	-0.0704083	0.469574	-0.480615	-0.269317	0.147064	-0.562646	-0.56049	0.19936	-0.182259	0.0861174	-0.225898	-0.0112875	-0.316565	-0.486463	0.12685	-0.478371	-0.32158	-0.288741	0.0415832	-0.193098	0.0229351	0.067597	-0.136664	-0.409122	-0.544953	-0.280644	-0.255095	0.0815064	-0.333928	0.119445	-0.0305475	0.0223858	-0.342935	-0.441257	-0.908816	-0.294642	-0.473181	0.0817352	-0.719937	-0.348649	-0.602457	-0.498	0.363791
-4.85451	-0.467647	-0.889016	0.0902737	0.061505	-0.214208	0.231481	-0.071664	0.468218	-0.48147	-0.269896	0.14881	-0.563452	-0.561184	0.199288	-0.182275	0.0841292	-0.225493	-0.0126242	-0.316426	-0.486132	0.125014	-0.478433	-0.321038	-0.287217	0.0410671	-0.193446	0.0223144	0.0678688	-0.137061	-0.409708	-0.54582	-0.279758	-0.253127	0.0823312	-0.333739	0.120484	-0.0305814	0.0212519	-0.344949	-0.441302	-0.908534	-0.29553	-0.473088	0.0809669	-0.72014	-0.347262	-0.602405	-0.49798	0.364265
-4.85353	-0.468939	-0.889051	0.089392	0.059462	-0.213922	0.231142	-0.0729086	0.46687	-0.482309	-0.270476	0.150553	-0.56426	-0.561873	0.199221	-0.182284	0.0821398	-0.225086	-0.0139528	-0.316278	-0.485796	0.123185	-0.478491	-0.320482	-0.285688	0.0405506	-0.193784	0.0216907	0.0681378	-0.137454	-0.410287	-0.546682	-0.278878	-0.25116	0.0831596	-0.33355	0.121524	-0.0306161	0.0201241	-0.346963	-0.44135	-0.908242	-0.296422	-0.473	0.0801901	-0.720337	-0.345865	-0.602352	-0.497955	0.364742
-4.85254	-0.470225	-0.889096	0.0885171	0.0574203	-0.213641	0.230794	-0.074142	0.465527	-0.483131	-0.271059	0.152291	-0.565071	-0.562556	0.199158	-0.182287	0.0801494	-0.224676	-0.0152733	-0.31612	-0.485457	0.121362	-0.478546	-0.319911	-0.284154	0.0400337	-0.194112	0.021064	0.0684042	-0.137842	-0.410859	-0.547538	-0.278006	-0.249194	0.0839914	-0.333361	0.122563	-0.0306516	0.0190027	-0.348978	-0.4414	-0.907942	-0.297317	-0.472918	0.079405	-0.720529	-0.344458	-0.602296	-0.497923	0.365222
-4.85156	-0.471506	-0.889153	0.0876491	0.0553802	-0.213364	0.230435	-0.0753641	0.464192	-0.483936	-0.271645	0.154025	-0.565886	-0.563234	0.1991	-0.182283	0.0781583	-0.224263	-0.0165856	-0.315952	-0.485114	0.119546	-0.478597	-0.319326	-0.282616	0.0395163	-0.19443	0.0204343	0.0686681	-0.138224	-0.411425	-0.548389	-0.277142	-0.24723	0.0848265	-0.333173	0.123603	-0.030688	0.0178877	-0.350994	-0.441454	-0.907632	-0.298216	-0.47284	0.0786117	-0.720715	-0.343042	-0.602239	-0.497885	0.365705
-4.85058	-0.47278	-0.88922	0.0867881	0.0533418	-0.213092	0.230066	-0.0765747	0.462864	-0.484725	-0.272232	0.155755	-0.566703	-0.563906	0.199046	-0.182273	0.0761666	-0.223849	-0.0178897	-0.315775	-0.484767	0.117736	-0.478645	-0.318728	-0.281073	0.0389984	-0.194739	0.0198019	0.0689295	-0.138602	-0.411986	-0.549235	-0.276286	-0.245267	0.0856647	-0.332985	0.124642	-0.0307251	0.0167794	-0.35301	-0.44151	-0.907313	-0.299119	-0.472768	0.0778102	-0.720895	-0.341616	-0.60218	-0.49784	0.366191
-4.84959	-0.474049	-0.889298	0.0859341	0.0513053	-0.212823	0.229688	-0.0777738	0.461542	-0.485497	-0.272822	0.15748	-0.567523	-0.564573	0.198998	-0.182256	0.0741743	-0.223431	-0.0191858	-0.315588	-0.484417	0.115933	-0.478689	-0.318115	-0.279526	0.03848	-0.195038	0.0191666	0.0691886	-0.138974	-0.41254	-0.550075	-0.275437	-0.243306	0.086506	-0.332798	0.125682	-0.030763	0.015678	-0.355025	-0.441569	-0.906985	-0.300026	-0.472701	0.0770005	-0.721069	-0.340181	-0.602119	-0.49779	0.366679
-4.84861	-0.475312	-0.889386	0.0850873	0.0492708	-0.212559	0.229299	-0.0789612	0.460227	-0.486253	-0.273413	0.1592	-0.568346	-0.565234	0.198954	-0.182232	0.0721818	-0.223011	-0.0204736	-0.31539	-0.484062	0.114137	-0.478731	-0.317488	-0.277975	0.0379611	-0.195327	0.0185286	0.0694455	-0.13934	-0.413088	-0.550909	-0.274596	-0.241347	0.0873502	-0.33261	0.126722	-0.0308017	0.0145835	-0.357041	-0.441632	-0.906648	-0.300936	-0.472639	0.0761829	-0.721238	-0.338736	-0.602056	-0.497733	0.367171
-4.84763	-0.476568	-0.889486	0.0842477	0.0472385	-0.2123	0.2289	-0.0801369	0.458919	-0.486991	-0.274006	0.160915	-0.569172	-0.565889	0.198915	-0.182202	0.0701891	-0.222589	-0.0217533	-0.315183	-0.483705	0.112348	-0.478768	-0.316847	-0.276419	0.0374418	-0.195607	0.017888	0.0697002	-0.139701	-0.41363	-0.551738	-0.273764	-0.23939	0.0881972	-0.332423	0.127762	-0.0308411	0.0134963	-0.359057	-0.441697	-0.906303	-0.301851	-0.472583	0.0753572	-0.7214	-0.337282	-0.601992	-0.49767	0.367665
-4.84665	-0.477818	-0.889597	0.0834154	0.0452085	-0.212045	0.228491	-0.0813007	0.457617	-0.487712	-0.274601	0.162626	-0.570001	-0.566539	0.198881	-0.182164	0.0681965	-0.222165	-0.0230248	-0.314966	-0.483343	0.110566	-0.478803	-0.316192	-0.274859	0.0369219	-0.195876	0.0172447	0.0699528	-0.140057	-0.414166	-0.552561	-0.272939	-0.237436	0.0890468	-0.332237	0.128802	-0.0308812	0.0124164	-0.361072	-0.441766	-0.905948	-0.302768	-0.472531	0.0745236	-0.721557	-0.335818	-0.601926	-0.497601	0.368162
-4.84566	-0.479061	-0.889718	0.0825905	0.043181	-0.211794	0.228072	-0.0824525	0.456322	-0.488417	-0.275197	0.164332	-0.570832	-0.567183	0.198852	-0.18212	0.066204	-0.221737	-0.0242882	-0.314739	-0.482979	0.108791	-0.478834	-0.315524	-0.273295	0.0364015	-0.196136	0.0165988	0.0702034	-0.140406	-0.414697	-0.553379	-0.272123	-0.235484	0.0898989	-0.33205	0.129842	-0.0309219	0.0113441	-0.363086	-0.441838	-0.905584	-0.30369	-0.472485	0.0736822	-0.721708	-0.334345	-0.601858	-0.497525	0.368661
-4.84468	-0.480298	-0.88985	0.0817731	0.041156	-0.211547	0.227644	-0.0835923	0.455035	-0.489104	-0.275795	0.166033	-0.571667	-0.567821	0.198829	-0.182068	0.0642119	-0.221308	-0.0255434	-0.314502	-0.482611	0.107023	-0.478863	-0.314841	-0.271727	0.0358805	-0.196386	0.0159505	0.0704522	-0.14075	-0.415222	-0.55419	-0.271315	-0.233534	0.0907533	-0.331864	0.130882	-0.0309632	0.0102794	-0.3651	-0.441913	-0.905211	-0.304615	-0.472443	0.072833	-0.721853	-0.332863	-0.601788	-0.497443	0.369163
-4.8437	-0.481528	-0.889994	0.0809632	0.0391339	-0.211305	0.227205	-0.0847199	0.453753	-0.489774	-0.276394	0.167728	-0.572504	-0.568454	0.19881	-0.182009	0.0622203	-0.220876	-0.0267905	-0.314255	-0.482239	0.105262	-0.478888	-0.314144	-0.270155	0.0353591	-0.196626	0.0152998	0.0706991	-0.141089	-0.415742	-0.554996	-0.270516	-0.231588	0.0916101	-0.331678	0.131922	-0.0310052	0.00922269	-0.367113	-0.441992	-0.904829	-0.305544	-0.472407	0.0719761	-0.721991	-0.331371	-0.601716	-0.497355	0.369667
-4.84271	-0.482751	-0.890148	0.080161	0.0371146	-0.211067	0.226756	-0.0858353	0.452479	-0.490427	-0.276994	0.169418	-0.573344	-0.569081	0.198797	-0.181943	0.0602293	-0.220441	-0.0280294	-0.313998	-0.481865	0.103509	-0.478911	-0.313434	-0.26858	0.0348371	-0.196857	0.0146466	0.0709444	-0.141421	-0.416256	-0.555795	-0.269725	-0.229644	0.0924689	-0.331492	0.132963	-0.0310478	0.008174	-0.369126	-0.442074	-0.904439	-0.306477	-0.472376	0.0711116	-0.722124	-0.329871	-0.601642	-0.497261	0.370173
-4.84173	-0.483968	-0.890313	0.0793665	0.0350984	-0.210834	0.226297	-0.0869383	0.451212	-0.491063	-0.277596	0.171103	-0.574187	-0.569702	0.19879	-0.18187	0.0582391	-0.220005	-0.0292602	-0.313731	-0.481487	0.101763	-0.478931	-0.31271	-0.267	0.0343145	-0.197077	0.0139912	0.071188	-0.141748	-0.416765	-0.556589	-0.268943	-0.227704	0.0933297	-0.331306	0.134003	-0.0310909	0.00713354	-0.371136	-0.442159	-0.904039	-0.307413	-0.47235	0.0702395	-0.722251	-0.328361	-0.601567	-0.49716	0.370682
-4.84075	-0.485177	-0.890489	0.0785798	0.0330855	-0.210605	0.225829	-0.0880289	0.449951	-0.491681	-0.278198	0.172783	-0.575032	-0.570318	0.198788	-0.181789	0.05625	-0.219565	-0.0304829	-0.313453	-0.481106	0.100024	-0.478948	-0.311972	-0.265417	0.0337914	-0.197288	0.0133335	0.0714301	-0.142068	-0.417269	-0.557376	-0.268169	-0.225767	0.0941923	-0.331121	0.135044	-0.0311346	0.00610147	-0.373146	-0.442248	-0.903631	-0.308353	-0.472328	0.06936	-0.722371	-0.326842	-0.601489	-0.497053	0.371193
-4.83976	-0.486379	-0.890677	0.0778009	0.0310759	-0.21038	0.22535	-0.0891069	0.448697	-0.492282	-0.278801	0.174457	-0.575881	-0.570927	0.198791	-0.181701	0.054262	-0.219123	-0.0316975	-0.313165	-0.480722	0.0982931	-0.478962	-0.31122	-0.26383	0.0332678	-0.197488	0.0126736	0.0716708	-0.142382	-0.417767	-0.558157	-0.267405	-0.223833	0.0950566	-0.330936	0.136084	-0.0311787	0.00507797	-0.375154	-0.44234	-0.903213	-0.309296	-0.472312	0.0684731	-0.722485	-0.325315	-0.60141	-0.49694	0.371705
-4.83878	-0.487574	-0.890875	0.07703	0.0290697	-0.21016	0.224862	-0.0901723	0.44745	-0.492866	-0.279405	0.176125	-0.576732	-0.571531	0.1988	-0.181605	0.0522752	-0.218679	-0.032904	-0.312867	-0.480336	0.0965697	-0.478974	-0.310454	-0.26224	0.0327436	-0.197679	0.0120116	0.0719102	-0.14269	-0.418261	-0.558932	-0.266649	-0.221904	0.0959225	-0.33075	0.137125	-0.0312234	0.00406321	-0.37716	-0.442436	-0.902787	-0.310243	-0.472301	0.0675788	-0.722593	-0.323778	-0.601329	-0.49682	0.37222
-4.8378	-0.488761	-0.891084	0.0762671	0.0270673	-0.209944	0.224363	-0.091225	0.446209	-0.493432	-0.280009	0.177787	-0.577586	-0.572129	0.198815	-0.181502	0.05029	-0.218233	-0.0341024	-0.312559	-0.479946	0.094854	-0.478983	-0.309675	-0.260646	0.0322188	-0.19786	0.0113475	0.0721483	-0.142992	-0.41875	-0.559701	-0.265903	-0.219978	0.0967898	-0.330565	0.138166	-0.0312685	0.00305736	-0.379165	-0.442536	-0.902353	-0.311194	-0.472294	0.0666772	-0.722694	-0.322233	-0.601246	-0.496694	0.372736
-4.83682	-0.489941	-0.891304	0.0755123	0.0250686	-0.209732	0.223855	-0.0922649	0.444976	-0.493981	-0.280614	0.179444	-0.578442	-0.572721	0.198836	-0.181391	0.0483063	-0.217783	-0.0352928	-0.31224	-0.479554	0.0931461	-0.478989	-0.308882	-0.259049	0.0316935	-0.198031	0.0106815	0.0723852	-0.143288	-0.419235	-0.560463	-0.265166	-0.218056	0.0976583	-0.33038	0.139207	-0.0313141	0.00206058	-0.381167	-0.442639	-0.901909	-0.312148	-0.472293	0.0657685	-0.72279	-0.320679	-0.601162	-0.496562	0.373254
-4.83583	-0.491113	-0.891535	0.0747656	0.0230739	-0.209525	0.223336	-0.0932919	0.443749	-0.494512	-0.281219	0.181095	-0.579301	-0.573308	0.198862	-0.181272	0.0463244	-0.217332	-0.0364751	-0.311911	-0.479158	0.0914461	-0.478994	-0.308076	-0.257449	0.0311676	-0.198192	0.0100135	0.0726211	-0.143577	-0.419714	-0.561218	-0.264437	-0.216139	0.0985281	-0.330195	0.140249	-0.03136	0.00107304	-0.383167	-0.442747	-0.901457	-0.313105	-0.472296	0.0648527	-0.722878	-0.319117	-0.601075	-0.496423	0.373774
-4.83485	-0.492277	-0.891778	0.0740272	0.0210833	-0.209322	0.222808	-0.0943059	0.44253	-0.495026	-0.281825	0.182739	-0.580163	-0.573888	0.198895	-0.181145	0.0443445	-0.216878	-0.0376494	-0.311572	-0.478761	0.089754	-0.478996	-0.307256	-0.255846	0.0306412	-0.198343	0.00934361	0.0728561	-0.14386	-0.420189	-0.561967	-0.263719	-0.214226	0.0993988	-0.330009	0.14129	-0.0314064	9.49139e-05	-0.385165	-0.442858	-0.900996	-0.314066	-0.472305	0.0639298	-0.722961	-0.317545	-0.600987	-0.496279	0.374296
-4.83387	-0.493434	-0.892031	0.073297	0.0190969	-0.209123	0.22227	-0.0953069	0.441317	-0.495522	-0.28243	0.184378	-0.581027	-0.574463	0.198933	-0.181011	0.0423667	-0.216422	-0.0388158	-0.311222	-0.47836	0.08807	-0.478996	-0.306422	-0.254239	0.0301142	-0.198484	0.00867194	0.0730901	-0.144136	-0.42066	-0.56271	-0.263009	-0.212318	0.10027	-0.329824	0.142331	-0.0314531	-0.00087364	-0.38716	-0.442972	-0.900526	-0.315031	-0.472318	0.0629999	-0.723037	-0.315966	-0.600896	-0.496127	0.374818
-4.83288	-0.494582	-0.892296	0.0725752	0.0171149	-0.208929	0.221722	-0.0962947	0.440111	-0.496	-0.283036	0.18601	-0.581894	-0.575032	0.198977	-0.180868	0.0403911	-0.215963	-0.0399741	-0.310861	-0.477957	0.0863941	-0.478993	-0.305575	-0.25263	0.0295866	-0.198616	0.00799853	0.0733234	-0.144406	-0.421126	-0.563446	-0.262309	-0.210414	0.101143	-0.329639	0.143373	-0.0315001	-0.00183245	-0.389153	-0.443091	-0.900048	-0.315999	-0.472336	0.0620632	-0.723106	-0.314378	-0.600804	-0.49597	0.375343
-4.8319	-0.495723	-0.892571	0.0718618	0.0151374	-0.208739	0.221165	-0.0972694	0.438911	-0.496461	-0.283641	0.187635	-0.582764	-0.575594	0.199028	-0.180718	0.0384179	-0.215502	-0.0411245	-0.310491	-0.477552	0.0847263	-0.478989	-0.304715	-0.251017	0.0290584	-0.198737	0.00732344	0.0735559	-0.144669	-0.421589	-0.564175	-0.261619	-0.208515	0.102015	-0.329454	0.144415	-0.0315475	-0.00278136	-0.391142	-0.443214	-0.899562	-0.31697	-0.472358	0.0611197	-0.723169	-0.312781	-0.60071	-0.495806	0.375868
-4.83092	-0.496855	-0.892857	0.0711569	0.0131646	-0.208553	0.220597	-0.0982307	0.437719	-0.496904	-0.284246	0.189255	-0.583636	-0.576151	0.199084	-0.180559	0.0364472	-0.215038	-0.0422671	-0.310109	-0.477144	0.0830668	-0.478983	-0.303841	-0.249402	0.0285297	-0.198849	0.00664675	0.0737879	-0.144925	-0.422047	-0.564897	-0.260938	-0.206622	0.102889	-0.329269	0.145457	-0.0315951	-0.0037202	-0.393129	-0.443341	-0.899066	-0.317945	-0.472386	0.0601694	-0.723226	-0.311176	-0.600614	-0.495636	0.376395
-4.82993	-0.497979	-0.893155	0.0704605	0.0111966	-0.208371	0.22002	-0.0991787	0.436534	-0.497329	-0.284851	0.190868	-0.58451	-0.576702	0.199147	-0.180392	0.0344793	-0.214572	-0.0434017	-0.309717	-0.476734	0.0814156	-0.478975	-0.302954	-0.247784	0.0280005	-0.19895	0.00596851	0.0740193	-0.145175	-0.422501	-0.565613	-0.260268	-0.204733	0.103762	-0.329083	0.146499	-0.031643	-0.00464881	-0.395112	-0.443471	-0.898562	-0.318923	-0.472418	0.0592125	-0.723275	-0.309563	-0.600516	-0.49546	0.376923
-4.82895	-0.499094	-0.893463	0.0697728	0.00923351	-0.208193	0.219433	-0.100113	0.435355	-0.497737	-0.285455	0.192474	-0.585388	-0.577247	0.199216	-0.180217	0.0325142	-0.214104	-0.0445284	-0.309315	-0.476322	0.0797728	-0.478965	-0.302053	-0.246164	0.0274706	-0.199042	0.00528878	0.0742503	-0.145417	-0.422951	-0.566321	-0.259606	-0.20285	0.104636	-0.328898	0.147541	-0.0316912	-0.00556703	-0.397092	-0.443606	-0.89805	-0.319905	-0.472455	0.058249	-0.723318	-0.307942	-0.600416	-0.495277	0.377452
-4.82797	-0.500201	-0.893783	0.0690937	0.00727555	-0.20802	0.218836	-0.101034	0.434183	-0.498127	-0.286058	0.194073	-0.586267	-0.577786	0.199291	-0.180034	0.0305522	-0.213633	-0.0456474	-0.308902	-0.475908	0.0781386	-0.478953	-0.30114	-0.244541	0.0269402	-0.199124	0.00460765	0.074481	-0.145653	-0.423397	-0.567022	-0.258955	-0.200973	0.10551	-0.328712	0.148583	-0.0317395	-0.00647469	-0.399068	-0.443745	-0.89753	-0.32089	-0.472496	0.057279	-0.723355	-0.306313	-0.600315	-0.495088	0.377982
-4.82698	-0.501299	-0.894114	0.0684233	0.00532283	-0.207851	0.218229	-0.101942	0.433018	-0.498499	-0.286661	0.195666	-0.587149	-0.578319	0.199373	-0.179843	0.0285934	-0.21316	-0.0467586	-0.308479	-0.475491	0.0765128	-0.47894	-0.300213	-0.242916	0.0264093	-0.199196	0.00392517	0.0747114	-0.145882	-0.42384	-0.567717	-0.258314	-0.199101	0.106383	-0.328526	0.149626	-0.0317881	-0.00737163	-0.401041	-0.443889	-0.897001	-0.321878	-0.472542	0.0563025	-0.723384	-0.304676	-0.600211	-0.494893	0.378513
-4.826	-0.502388	-0.894455	0.0677616	0.00337549	-0.207686	0.217612	-0.102836	0.431861	-0.498854	-0.287263	0.197251	-0.588034	-0.578846	0.199461	-0.179643	0.0266378	-0.212684	-0.047862	-0.308045	-0.475073	0.0748958	-0.478925	-0.299273	-0.241288	0.0258778	-0.199258	0.0032414	0.0749417	-0.146103	-0.424279	-0.568404	-0.257683	-0.197236	0.107257	-0.32834	0.150668	-0.0318369	-0.0082577	-0.40301	-0.444036	-0.896463	-0.322869	-0.472593	0.0553197	-0.723407	-0.303031	-0.600106	-0.494691	0.379045
-4.82502	-0.503468	-0.894808	0.0671089	0.00143367	-0.207525	0.216986	-0.103716	0.43071	-0.49919	-0.287864	0.19883	-0.588921	-0.579367	0.199555	-0.179434	0.0246858	-0.212206	-0.0489577	-0.3076	-0.474653	0.0732874	-0.478908	-0.29832	-0.239658	0.0253458	-0.199311	0.00255642	0.0751719	-0.146318	-0.424715	-0.569084	-0.257061	-0.195376	0.10813	-0.328154	0.151711	-0.0318858	-0.00913273	-0.404974	-0.444188	-0.895917	-0.323863	-0.472648	0.0543307	-0.723423	-0.301378	-0.599998	-0.494483	0.379577
-4.82404	-0.50454	-0.895172	0.066465	-0.0005025	-0.207368	0.21635	-0.104582	0.429565	-0.499509	-0.288463	0.200402	-0.58981	-0.579881	0.199656	-0.179217	0.0227374	-0.211725	-0.0500457	-0.307145	-0.47423	0.0716878	-0.478891	-0.297354	-0.238026	0.0248132	-0.199353	0.0018703	0.0754021	-0.146525	-0.425148	-0.569756	-0.25645	-0.193523	0.109002	-0.327968	0.152754	-0.0319348	-0.00999657	-0.406934	-0.444344	-0.895363	-0.324861	-0.472707	0.0533354	-0.723432	-0.299717	-0.599889	-0.494269	0.38011
-4.82305	-0.505602	-0.895546	0.06583	-0.00243287	-0.207215	0.215704	-0.105435	0.428428	-0.49981	-0.289062	0.201966	-0.590702	-0.58039	0.199763	-0.178991	0.0207927	-0.211243	-0.0511261	-0.306679	-0.473806	0.0700971	-0.478872	-0.296375	-0.236392	0.0242801	-0.199386	0.00118309	0.0756325	-0.146725	-0.425577	-0.570422	-0.25585	-0.191676	0.109874	-0.327781	0.153797	-0.0319839	-0.0108491	-0.40889	-0.444505	-0.894801	-0.325862	-0.472771	0.052334	-0.723434	-0.298049	-0.599777	-0.494048	0.380644
-4.82207	-0.506655	-0.895932	0.065204	-0.0043573	-0.207067	0.215049	-0.106274	0.427298	-0.500093	-0.289659	0.203523	-0.591596	-0.580892	0.199877	-0.178757	0.0188521	-0.210757	-0.0521989	-0.306202	-0.473381	0.0685153	-0.478852	-0.295384	-0.234756	0.0237464	-0.199408	0.000494864	0.075863	-0.146918	-0.426003	-0.571079	-0.255259	-0.189835	0.110744	-0.327595	0.154841	-0.0320331	-0.0116901	-0.410841	-0.44467	-0.894231	-0.326865	-0.47284	0.0513266	-0.72343	-0.296373	-0.599664	-0.493822	0.381177
-4.82109	-0.507699	-0.896329	0.064587	-0.00627566	-0.206922	0.214384	-0.107099	0.426175	-0.500358	-0.290254	0.205073	-0.592492	-0.581389	0.199998	-0.178514	0.0169154	-0.21027	-0.0532641	-0.305715	-0.472953	0.0669426	-0.47883	-0.294379	-0.233118	0.0232122	-0.199421	-0.000194306	0.0760939	-0.147103	-0.426426	-0.57173	-0.254679	-0.188001	0.111614	-0.327408	0.155884	-0.0320824	-0.0125194	-0.412787	-0.444839	-0.893653	-0.327872	-0.472913	0.0503132	-0.723418	-0.29469	-0.599548	-0.493589	0.381712
-4.8201	-0.508733	-0.896737	0.0639792	-0.00818781	-0.206781	0.213709	-0.107909	0.425059	-0.500605	-0.290848	0.206615	-0.593391	-0.581879	0.200125	-0.178262	0.0149831	-0.20978	-0.0543219	-0.305217	-0.472524	0.0653789	-0.478808	-0.293362	-0.231479	0.0226776	-0.199424	-0.000884355	0.0763251	-0.147281	-0.426846	-0.572372	-0.254109	-0.186174	0.112483	-0.32722	0.156928	-0.0321317	-0.0133369	-0.414728	-0.445013	-0.893066	-0.328882	-0.47299	0.0492939	-0.723399	-0.292999	-0.599431	-0.493349	0.382246
-4.81912	-0.509757	-0.897155	0.0633804	-0.0100936	-0.206644	0.213024	-0.108706	0.423949	-0.500835	-0.29144	0.20815	-0.594292	-0.582363	0.200259	-0.178002	0.0130551	-0.209288	-0.0553722	-0.304709	-0.472094	0.0638244	-0.478785	-0.292332	-0.229837	0.0221424	-0.199418	-0.00157522	0.0765568	-0.147451	-0.427264	-0.573007	-0.25355	-0.184354	0.11335	-0.327032	0.157971	-0.0321811	-0.0141425	-0.416663	-0.445191	-0.892471	-0.329895	-0.473071	0.0482688	-0.723374	-0.291301	-0.599312	-0.493104	0.382781
-4.81814	-0.510772	-0.897585	0.0627908	-0.0119929	-0.206511	0.21233	-0.109489	0.422847	-0.501047	-0.292031	0.209677	-0.595195	-0.582841	0.2004	-0.177732	0.0111316	-0.208793	-0.056415	-0.30419	-0.471662	0.0622791	-0.47876	-0.29129	-0.228195	0.0216066	-0.199401	-0.00226683	0.076789	-0.147614	-0.427679	-0.573635	-0.253002	-0.182541	0.114216	-0.326844	0.159015	-0.0322304	-0.0149359	-0.418594	-0.445375	-0.891869	-0.33091	-0.473157	0.047238	-0.723341	-0.289596	-0.59919	-0.492852	0.383315
-4.81715	-0.511777	-0.898025	0.0622105	-0.0138856	-0.206382	0.211626	-0.110257	0.421752	-0.501241	-0.292619	0.211196	-0.5961	-0.583313	0.200547	-0.177453	0.00921286	-0.208296	-0.0574506	-0.30366	-0.471228	0.0607431	-0.478736	-0.290234	-0.226551	0.0210705	-0.199375	-0.00295911	0.0770219	-0.147769	-0.428091	-0.574254	-0.252463	-0.180736	0.11508	-0.326656	0.160059	-0.0322797	-0.0157171	-0.420518	-0.445562	-0.891258	-0.331928	-0.473247	0.0462016	-0.723301	-0.287884	-0.599067	-0.492594	0.38385
-4.81617	-0.512772	-0.898476	0.0616393	-0.0157716	-0.206256	0.210913	-0.111012	0.420663	-0.501417	-0.293205	0.212708	-0.597007	-0.583778	0.200701	-0.177166	0.0072989	-0.207797	-0.0584787	-0.30312	-0.470794	0.0592165	-0.47871	-0.289167	-0.224905	0.0205338	-0.19934	-0.003652	0.0772555	-0.147917	-0.428501	-0.574866	-0.251936	-0.178937	0.115942	-0.326467	0.161104	-0.032329	-0.0164858	-0.422437	-0.445755	-0.89064	-0.33295	-0.473341	0.0451595	-0.723254	-0.286165	-0.598942	-0.49233	0.384384
-4.81519	-0.513758	-0.898939	0.0610775	-0.0176506	-0.206135	0.21019	-0.111752	0.419582	-0.501575	-0.293789	0.214211	-0.597917	-0.584237	0.200862	-0.176869	0.00538991	-0.207295	-0.0594997	-0.302569	-0.470358	0.0576993	-0.478684	-0.288087	-0.223258	0.0199966	-0.199294	-0.00434544	0.0774899	-0.148056	-0.428908	-0.57547	-0.251419	-0.177147	0.116803	-0.326278	0.162148	-0.0323782	-0.017242	-0.42435	-0.445952	-0.890014	-0.333973	-0.473439	0.044112	-0.723199	-0.284439	-0.598814	-0.49206	0.384918
-4.81421	-0.514733	-0.899412	0.060525	-0.0195227	-0.206017	0.209457	-0.112478	0.418508	-0.501715	-0.294371	0.215707	-0.598829	-0.58469	0.20103	-0.176563	0.00348604	-0.206791	-0.0605134	-0.302008	-0.469921	0.0561917	-0.478657	-0.286995	-0.221611	0.019459	-0.199239	-0.00503935	0.0777252	-0.148188	-0.429313	-0.576066	-0.250913	-0.175364	0.117662	-0.326089	0.163192	-0.0324273	-0.0179855	-0.426257	-0.446153	-0.88938	-0.335	-0.473541	0.0430591	-0.723138	-0.282706	-0.598685	-0.491783	0.385452
-4.81322	-0.515698	-0.899896	0.0599819	-0.0213876	-0.205902	0.208715	-0.113189	0.417441	-0.501838	-0.29495	0.217194	-0.599742	-0.585137	0.201204	-0.176248	0.00158743	-0.206284	-0.06152	-0.301436	-0.469483	0.0546936	-0.47863	-0.28589	-0.219962	0.018921	-0.199174	-0.00573367	0.0779615	-0.148312	-0.429716	-0.576654	-0.250418	-0.173589	0.118518	-0.325899	0.164237	-0.0324763	-0.0187161	-0.428157	-0.44636	-0.888738	-0.336029	-0.473647	0.0420008	-0.723069	-0.280966	-0.598553	-0.491501	0.385985
-4.81224	-0.516652	-0.90039	0.0594482	-0.0232452	-0.205792	0.207963	-0.113886	0.41638	-0.501942	-0.295526	0.218674	-0.600658	-0.585577	0.201386	-0.175924	-0.000305787	-0.205776	-0.0625194	-0.300853	-0.469044	0.0532052	-0.478603	-0.284773	-0.218312	0.0183825	-0.199099	-0.00642832	0.0781988	-0.148429	-0.430117	-0.577234	-0.249933	-0.171821	0.119372	-0.325708	0.165282	-0.0325252	-0.0194338	-0.430051	-0.446571	-0.888089	-0.337061	-0.473757	0.0409373	-0.722992	-0.27922	-0.59842	-0.491212	0.386518
-4.81126	-0.517596	-0.900896	0.058924	-0.0250954	-0.205684	0.207202	-0.114569	0.415327	-0.502029	-0.2961	0.220145	-0.601576	-0.586011	0.201574	-0.175591	-0.00219346	-0.205264	-0.0635118	-0.30026	-0.468604	0.0517266	-0.478575	-0.283644	-0.216662	0.0178435	-0.199015	-0.00712325	0.0784373	-0.148537	-0.430516	-0.577805	-0.24946	-0.170062	0.120224	-0.325517	0.166327	-0.032574	-0.0201382	-0.431938	-0.446787	-0.887432	-0.338095	-0.473871	0.0398686	-0.722909	-0.277467	-0.598284	-0.490917	0.38705
-4.81027	-0.51853	-0.901412	0.0584092	-0.0269381	-0.205581	0.206431	-0.115237	0.414281	-0.502099	-0.296671	0.221608	-0.602496	-0.586439	0.20177	-0.175248	-0.00407545	-0.204751	-0.0644972	-0.299656	-0.468163	0.0502577	-0.478547	-0.282504	-0.21501	0.0173042	-0.198921	-0.00781838	0.0786771	-0.148637	-0.430913	-0.578369	-0.248997	-0.168312	0.121073	-0.325326	0.167372	-0.0326225	-0.0208294	-0.433819	-0.447009	-0.886767	-0.339132	-0.473989	0.0387948	-0.722818	-0.275707	-0.598146	-0.490616	0.387582
-4.80929	-0.519453	-0.901939	0.0579039	-0.0287731	-0.205481	0.205651	-0.115891	0.413242	-0.50215	-0.297239	0.223062	-0.603417	-0.58686	0.201972	-0.174896	-0.00595161	-0.204235	-0.0654757	-0.299042	-0.467721	0.0487987	-0.478519	-0.281351	-0.213359	0.0167645	-0.198818	-0.00851364	0.0789181	-0.148729	-0.431309	-0.578924	-0.248546	-0.166569	0.121919	-0.325134	0.168417	-0.032671	-0.0215072	-0.435692	-0.447235	-0.886095	-0.340171	-0.474111	0.037716	-0.722719	-0.273942	-0.598006	-0.490309	0.388112
-4.80831	-0.520365	-0.902477	0.0574082	-0.0306003	-0.205384	0.204861	-0.11653	0.41221	-0.502184	-0.297804	0.224508	-0.604341	-0.587275	0.202181	-0.174534	-0.00782181	-0.203717	-0.0664474	-0.298417	-0.467279	0.0473497	-0.478491	-0.280186	-0.211706	0.0162244	-0.198705	-0.00920897	0.0791606	-0.148813	-0.431703	-0.579471	-0.248105	-0.164835	0.122763	-0.324942	0.169463	-0.0327192	-0.0221714	-0.437558	-0.447466	-0.885415	-0.341212	-0.474236	0.0366322	-0.722613	-0.27217	-0.597865	-0.489996	0.388642
-4.80732	-0.521266	-0.903025	0.056922	-0.0324196	-0.20529	0.204062	-0.117155	0.411186	-0.5022	-0.298365	0.225945	-0.605266	-0.587683	0.202397	-0.174163	-0.0096859	-0.203197	-0.0674122	-0.297782	-0.466836	0.0459107	-0.478464	-0.279009	-0.210054	0.0156839	-0.198583	-0.0099043	0.0794045	-0.148889	-0.432095	-0.580009	-0.247675	-0.16311	0.123603	-0.324749	0.170508	-0.0327672	-0.0228219	-0.439416	-0.447701	-0.884728	-0.342256	-0.474365	0.0355436	-0.7225	-0.270392	-0.59772	-0.489676	0.389171
-4.80634	-0.522156	-0.903584	0.0564454	-0.0342309	-0.2052	0.203254	-0.117765	0.410168	-0.502198	-0.298924	0.227374	-0.606193	-0.588085	0.20262	-0.173782	-0.0115438	-0.202674	-0.0683702	-0.297136	-0.466392	0.0444817	-0.478436	-0.277821	-0.208401	0.015143	-0.198451	-0.0105996	0.07965	-0.148957	-0.432486	-0.580539	-0.247257	-0.161394	0.12444	-0.324556	0.171554	-0.0328149	-0.0234586	-0.441266	-0.447942	-0.884034	-0.343302	-0.474498	0.0344502	-0.722379	-0.268608	-0.597574	-0.489351	0.389699
-4.80536	-0.523036	-0.904154	0.0559784	-0.0360339	-0.205113	0.202435	-0.118361	0.409157	-0.502179	-0.299478	0.228794	-0.607122	-0.58848	0.20285	-0.173392	-0.0133952	-0.202149	-0.0693216	-0.29648	-0.465948	0.0430629	-0.478409	-0.276621	-0.206748	0.0146018	-0.19831	-0.0112947	0.0798972	-0.149016	-0.432876	-0.58106	-0.246849	-0.159686	0.125274	-0.324362	0.1726	-0.0328624	-0.0240813	-0.443109	-0.448188	-0.883333	-0.34435	-0.474635	0.0333521	-0.722251	-0.266818	-0.597426	-0.48902	0.390225
-4.80438	-0.523904	-0.904734	0.0555211	-0.0378287	-0.20503	0.201608	-0.118942	0.408154	-0.502142	-0.30003	0.230205	-0.608053	-0.588869	0.203087	-0.172992	-0.0152402	-0.201622	-0.0702663	-0.295813	-0.465503	0.0416543	-0.478382	-0.27541	-0.205095	0.0140603	-0.19816	-0.0119896	0.080146	-0.149067	-0.433265	-0.581573	-0.246453	-0.157988	0.126105	-0.324167	0.173646	-0.0329096	-0.0246899	-0.444944	-0.448439	-0.882624	-0.3454	-0.474775	0.0322493	-0.722114	-0.265022	-0.597276	-0.488683	0.39075
-4.80339	-0.524761	-0.905325	0.0550734	-0.0396151	-0.204949	0.200771	-0.119508	0.407158	-0.502088	-0.300577	0.231607	-0.608986	-0.589252	0.203331	-0.172582	-0.0170785	-0.201093	-0.0712045	-0.295136	-0.465058	0.040256	-0.478356	-0.274187	-0.203442	0.0135185	-0.198	-0.0126842	0.0803967	-0.14911	-0.433652	-0.582077	-0.246068	-0.156298	0.126931	-0.323972	0.174692	-0.0329566	-0.0252842	-0.44677	-0.448695	-0.881908	-0.346452	-0.474918	0.031142	-0.72197	-0.26322	-0.597123	-0.488339	0.391274
-4.80241	-0.525606	-0.905926	0.0546354	-0.0413929	-0.204872	0.199925	-0.12006	0.406169	-0.502016	-0.301121	0.233001	-0.60992	-0.589628	0.203583	-0.172163	-0.0189101	-0.200561	-0.0721362	-0.294449	-0.464612	0.038868	-0.47833	-0.272953	-0.201789	0.0129764	-0.19783	-0.0133786	0.0806492	-0.149144	-0.434039	-0.582572	-0.245694	-0.154618	0.127755	-0.323776	0.175739	-0.0330032	-0.0258642	-0.448588	-0.448957	-0.881185	-0.347507	-0.475065	0.0300303	-0.721819	-0.261413	-0.596968	-0.48799	0.391796
-4.80143	-0.526441	-0.906538	0.0542071	-0.0431621	-0.204797	0.199069	-0.120597	0.405187	-0.501927	-0.301661	0.234385	-0.610856	-0.589997	0.203841	-0.171734	-0.0207347	-0.200027	-0.0730615	-0.293751	-0.464167	0.0374905	-0.478305	-0.271707	-0.200137	0.012434	-0.197652	-0.0140725	0.0809037	-0.14917	-0.434425	-0.583059	-0.245331	-0.152948	0.128574	-0.32358	0.176785	-0.0330495	-0.0264297	-0.450397	-0.449223	-0.880455	-0.348562	-0.475215	0.0289142	-0.72166	-0.2596	-0.596811	-0.487635	0.392317
-4.80044	-0.527263	-0.90716	0.0537886	-0.0449225	-0.204725	0.198204	-0.12112	0.404213	-0.50182	-0.302197	0.23576	-0.611793	-0.59036	0.204106	-0.171295	-0.0225522	-0.199491	-0.0739804	-0.293043	-0.463721	0.0361234	-0.47828	-0.27045	-0.198485	0.0118914	-0.197464	-0.0147659	0.0811602	-0.149187	-0.43481	-0.583537	-0.24498	-0.151287	0.129389	-0.323383	0.177832	-0.0330955	-0.0269806	-0.452198	-0.449494	-0.879718	-0.34962	-0.475368	0.0277937	-0.721493	-0.257782	-0.596652	-0.487274	0.392836
-4.79946	-0.528074	-0.907792	0.0533798	-0.046674	-0.204657	0.19733	-0.121627	0.403245	-0.501696	-0.302728	0.237126	-0.612732	-0.590717	0.204378	-0.170846	-0.0243626	-0.198952	-0.074893	-0.292325	-0.463275	0.0347669	-0.478257	-0.269183	-0.196834	0.0113486	-0.197267	-0.0154588	0.0814189	-0.149196	-0.435195	-0.584005	-0.24464	-0.149635	0.1302	-0.323185	0.178878	-0.0331411	-0.0275167	-0.453989	-0.449771	-0.878974	-0.35068	-0.475525	0.026669	-0.721318	-0.255959	-0.596491	-0.486907	0.393354
-4.79848	-0.528874	-0.908435	0.0529807	-0.0484164	-0.204591	0.196447	-0.12212	0.402285	-0.501554	-0.303256	0.238483	-0.613673	-0.591066	0.204657	-0.170387	-0.0261657	-0.198411	-0.0757994	-0.291596	-0.462828	0.033421	-0.478234	-0.267904	-0.195183	0.0108055	-0.197061	-0.0161511	0.0816797	-0.149196	-0.435578	-0.584465	-0.244311	-0.147993	0.131006	-0.322986	0.179925	-0.0331863	-0.0280379	-0.455771	-0.450053	-0.878224	-0.351741	-0.475685	0.0255402	-0.721135	-0.25413	-0.596327	-0.486535	0.393869
-4.79749	-0.529661	-0.909088	0.0525914	-0.0501498	-0.204528	0.195554	-0.122598	0.401333	-0.501395	-0.303779	0.23983	-0.614615	-0.591409	0.204944	-0.169919	-0.0279614	-0.197868	-0.0766997	-0.290857	-0.462382	0.0320858	-0.478212	-0.266614	-0.193533	0.0102623	-0.196846	-0.0168427	0.0819428	-0.149188	-0.435962	-0.584916	-0.243993	-0.146362	0.131809	-0.322787	0.180972	-0.0332312	-0.0285441	-0.457544	-0.45034	-0.877466	-0.352804	-0.475848	0.0244073	-0.720945	-0.252296	-0.596161	-0.486156	0.394383
-4.79651	-0.530437	-0.909751	0.0522119	-0.0518739	-0.204467	0.194652	-0.123062	0.400387	-0.501219	-0.304297	0.241168	-0.615559	-0.591746	0.205237	-0.16944	-0.0297495	-0.197323	-0.0775939	-0.290108	-0.461936	0.0307613	-0.478192	-0.265313	-0.191884	0.00971884	-0.196621	-0.0175335	0.0822082	-0.14917	-0.436345	-0.585358	-0.243687	-0.14474	0.132606	-0.322588	0.182019	-0.0332756	-0.0290352	-0.459307	-0.450633	-0.876702	-0.353868	-0.476014	0.0232704	-0.720746	-0.250457	-0.595993	-0.485772	0.394894
-4.79553	-0.5312	-0.910425	0.0518421	-0.0535886	-0.204409	0.193741	-0.123511	0.399449	-0.501026	-0.304811	0.242497	-0.616504	-0.592076	0.205537	-0.168951	-0.0315299	-0.196775	-0.0784821	-0.289349	-0.46149	0.0294476	-0.478173	-0.264002	-0.190236	0.00917527	-0.196388	-0.0182236	0.0824761	-0.149145	-0.436728	-0.58579	-0.243392	-0.143128	0.133399	-0.322387	0.183066	-0.0333197	-0.0295111	-0.46106	-0.45093	-0.875932	-0.354934	-0.476183	0.0221296	-0.72054	-0.248614	-0.595823	-0.485382	0.395403
-4.79454	-0.531951	-0.911108	0.0514822	-0.0552939	-0.204354	0.192821	-0.123945	0.398518	-0.500816	-0.305321	0.243816	-0.61745	-0.592399	0.205844	-0.168453	-0.0333024	-0.196226	-0.0793643	-0.28858	-0.461044	0.0281448	-0.478154	-0.26268	-0.188589	0.00863158	-0.196145	-0.0189128	0.0827464	-0.14911	-0.437111	-0.586214	-0.243108	-0.141526	0.134187	-0.322186	0.184114	-0.0333633	-0.0299716	-0.462804	-0.451233	-0.875154	-0.356001	-0.476355	0.020985	-0.720325	-0.246765	-0.59565	-0.484986	0.39591
-4.79356	-0.532691	-0.911802	0.0511321	-0.0569896	-0.204301	0.191891	-0.124364	0.397595	-0.500588	-0.305825	0.245125	-0.618398	-0.592715	0.206159	-0.167944	-0.0350671	-0.195674	-0.0802407	-0.287801	-0.460599	0.026853	-0.478138	-0.261348	-0.186943	0.00808778	-0.195894	-0.019601	0.0830192	-0.149067	-0.437494	-0.586628	-0.242836	-0.139935	0.13497	-0.321984	0.185161	-0.0334064	-0.0304166	-0.464537	-0.451541	-0.874371	-0.357069	-0.47653	0.0198366	-0.720103	-0.244912	-0.595475	-0.484585	0.396415
-4.79258	-0.533418	-0.912506	0.0507918	-0.0586756	-0.204251	0.190953	-0.124768	0.396679	-0.500344	-0.306324	0.246425	-0.619347	-0.593024	0.20648	-0.167425	-0.0368237	-0.19512	-0.0811113	-0.287012	-0.460153	0.0255721	-0.478122	-0.260005	-0.185298	0.0075439	-0.195634	-0.0202882	0.0832947	-0.149014	-0.437877	-0.587032	-0.242575	-0.138354	0.135748	-0.321782	0.186208	-0.0334491	-0.0308461	-0.46626	-0.451855	-0.873581	-0.358139	-0.476708	0.0186845	-0.719873	-0.243055	-0.595298	-0.484178	0.396917
-4.7916	-0.534132	-0.913219	0.0504613	-0.0603517	-0.204203	0.190005	-0.125158	0.39577	-0.500082	-0.306819	0.247715	-0.620297	-0.593327	0.206808	-0.166896	-0.038572	-0.194564	-0.0819762	-0.286213	-0.459709	0.0243023	-0.478109	-0.258652	-0.183656	0.00699996	-0.195364	-0.0209744	0.0835729	-0.148953	-0.43826	-0.587428	-0.242326	-0.136783	0.136521	-0.321578	0.187256	-0.0334914	-0.0312598	-0.467972	-0.452174	-0.872784	-0.35921	-0.476888	0.0175288	-0.719634	-0.241193	-0.595119	-0.483765	0.397417
-4.79061	-0.534834	-0.913943	0.0501406	-0.062018	-0.204157	0.189048	-0.125533	0.394868	-0.499804	-0.307308	0.248995	-0.621249	-0.593623	0.207143	-0.166357	-0.0403121	-0.194005	-0.0828355	-0.285404	-0.459264	0.0230436	-0.478096	-0.257288	-0.182014	0.00645599	-0.195086	-0.0216595	0.0838539	-0.148883	-0.438644	-0.587814	-0.242087	-0.135223	0.137288	-0.321374	0.188304	-0.0335331	-0.0316577	-0.469673	-0.452498	-0.871982	-0.360281	-0.477071	0.0163696	-0.719387	-0.239326	-0.594937	-0.483346	0.397914
-4.78963	-0.535524	-0.914676	0.0498297	-0.0636743	-0.204113	0.188082	-0.125893	0.393974	-0.499508	-0.307792	0.250266	-0.622202	-0.593912	0.207485	-0.165808	-0.0420438	-0.193445	-0.0836892	-0.284586	-0.45882	0.0217961	-0.478086	-0.255914	-0.180375	0.00591202	-0.1948	-0.0223433	0.0841377	-0.148805	-0.439028	-0.58819	-0.241861	-0.133674	0.138049	-0.321169	0.189352	-0.0335743	-0.0320397	-0.471364	-0.452828	-0.871173	-0.361354	-0.477257	0.0152069	-0.719133	-0.237456	-0.594753	-0.482922	0.398409
-4.78865	-0.536201	-0.915419	0.0495287	-0.0653204	-0.204071	0.187107	-0.126239	0.393088	-0.499196	-0.30827	0.251526	-0.623155	-0.594195	0.207834	-0.165248	-0.0437669	-0.192882	-0.0845375	-0.283757	-0.458377	0.0205599	-0.478077	-0.254531	-0.178737	0.00536806	-0.194504	-0.0230259	0.0844244	-0.148717	-0.439412	-0.588557	-0.241645	-0.132136	0.138805	-0.320963	0.190399	-0.0336151	-0.0324057	-0.473043	-0.453163	-0.870358	-0.362428	-0.477445	0.0140408	-0.71887	-0.235581	-0.594566	-0.482493	0.3989
-4.78766	-0.536865	-0.916172	0.0492375	-0.0669563	-0.204031	0.186124	-0.12657	0.392209	-0.498868	-0.308743	0.252776	-0.62411	-0.59447	0.20819	-0.164678	-0.0454813	-0.192317	-0.0853803	-0.282919	-0.457934	0.0193349	-0.47807	-0.253137	-0.177101	0.00482414	-0.1942	-0.0237071	0.084714	-0.14862	-0.439797	-0.588914	-0.241441	-0.130608	0.139555	-0.320757	0.191447	-0.0336553	-0.0327555	-0.474711	-0.453503	-0.869537	-0.363502	-0.477636	0.0128715	-0.718599	-0.233703	-0.594377	-0.482058	0.399389
-4.78668	-0.537517	-0.916935	0.0489561	-0.0685818	-0.203994	0.185131	-0.126886	0.391337	-0.498522	-0.309211	0.254017	-0.625066	-0.594739	0.208553	-0.164098	-0.047187	-0.19175	-0.0862178	-0.282072	-0.457492	0.0181214	-0.478066	-0.251734	-0.175467	0.0042803	-0.193887	-0.0243869	0.0850067	-0.148514	-0.440183	-0.589262	-0.241249	-0.129092	0.1403	-0.32055	0.192496	-0.0336949	-0.0330891	-0.476367	-0.453849	-0.86871	-0.364577	-0.477829	0.0116989	-0.718319	-0.23182	-0.594186	-0.481617	0.399875
-4.7857	-0.538156	-0.917707	0.0486846	-0.0701969	-0.203958	0.184129	-0.127187	0.390473	-0.498161	-0.309672	0.255247	-0.626023	-0.595001	0.208923	-0.163507	-0.0488837	-0.191181	-0.0870501	-0.281214	-0.45705	0.0169192	-0.478063	-0.250321	-0.173836	0.00373655	-0.193566	-0.0250653	0.0853025	-0.148399	-0.44057	-0.5896	-0.241067	-0.127587	0.141038	-0.320342	0.193544	-0.033734	-0.0334063	-0.478012	-0.4542	-0.867877	-0.365653	-0.478024	0.0105232	-0.718032	-0.229934	-0.593992	-0.481171	0.400357
-4.78471	-0.538781	-0.918489	0.0484228	-0.0718015	-0.203923	0.183118	-0.127474	0.389617	-0.497782	-0.310128	0.256467	-0.626981	-0.595255	0.2093	-0.162906	-0.0505715	-0.19061	-0.0878772	-0.280348	-0.456609	0.0157286	-0.478062	-0.248898	-0.172207	0.00319292	-0.193236	-0.0257422	0.0856015	-0.148275	-0.440957	-0.589928	-0.240897	-0.126092	0.14177	-0.320133	0.194592	-0.0337726	-0.0337071	-0.479644	-0.454556	-0.867039	-0.366729	-0.478221	0.00934446	-0.717735	-0.228044	-0.593796	-0.48072	0.400837
-4.78373	-0.539394	-0.91928	0.0481708	-0.0733954	-0.203891	0.182099	-0.127746	0.388768	-0.497387	-0.310578	0.257677	-0.62794	-0.595503	0.209683	-0.162295	-0.0522501	-0.190037	-0.0886993	-0.279472	-0.456169	0.0145495	-0.478064	-0.247466	-0.17058	0.00264945	-0.192898	-0.0264175	0.0859037	-0.148142	-0.441346	-0.590246	-0.240739	-0.124609	0.142495	-0.319923	0.19564	-0.0338106	-0.0339913	-0.481265	-0.454918	-0.866194	-0.367806	-0.478421	0.0081627	-0.717431	-0.226151	-0.593598	-0.480263	0.401313
-4.78275	-0.539993	-0.92008	0.0479287	-0.0749786	-0.20386	0.18107	-0.128003	0.387926	-0.496976	-0.311022	0.258876	-0.6289	-0.595744	0.210073	-0.161673	-0.0539195	-0.189462	-0.0895163	-0.278586	-0.45573	0.013382	-0.478067	-0.246024	-0.168956	0.00210616	-0.192551	-0.0270911	0.0862092	-0.148	-0.441735	-0.590555	-0.240592	-0.123137	0.143214	-0.319712	0.196689	-0.033848	-0.0342589	-0.482873	-0.455285	-0.865345	-0.368882	-0.478623	0.00697803	-0.717118	-0.224254	-0.593397	-0.479801	0.401786
-4.78177	-0.54058	-0.92089	0.0476963	-0.076551	-0.203831	0.180033	-0.128246	0.387092	-0.496549	-0.31146	0.260065	-0.629861	-0.595978	0.21047	-0.16104	-0.0555796	-0.188884	-0.0903284	-0.277691	-0.455292	0.0122261	-0.478073	-0.244573	-0.167334	0.00156307	-0.192196	-0.0277631	0.086518	-0.147849	-0.442126	-0.590853	-0.240456	-0.121677	0.143927	-0.319501	0.197737	-0.0338848	-0.0345098	-0.484469	-0.455658	-0.864489	-0.36996	-0.478827	0.00579052	-0.716797	-0.222354	-0.593194	-0.479334	0.402255
-4.78078	-0.541153	-0.921709	0.0474737	-0.0781124	-0.203803	0.178987	-0.128474	0.386266	-0.496106	-0.311891	0.261244	-0.630822	-0.596205	0.210874	-0.160398	-0.0572302	-0.188305	-0.0911357	-0.276787	-0.454855	0.011082	-0.478082	-0.243113	-0.165716	0.00102023	-0.191833	-0.0284333	0.0868303	-0.147688	-0.442518	-0.591142	-0.240331	-0.120228	0.144633	-0.319289	0.198785	-0.033921	-0.0347438	-0.486052	-0.456036	-0.863628	-0.371037	-0.479033	0.00460025	-0.716468	-0.22045	-0.592988	-0.478862	0.402721
-4.7798	-0.541713	-0.922538	0.0472609	-0.0796628	-0.203776	0.177932	-0.128688	0.385447	-0.495646	-0.312317	0.262412	-0.631784	-0.596424	0.211284	-0.159744	-0.0588712	-0.187724	-0.0919383	-0.275874	-0.454419	0.00994969	-0.478093	-0.241644	-0.1641	0.000477648	-0.191461	-0.0291016	0.087146	-0.147518	-0.442912	-0.591421	-0.240218	-0.118791	0.145331	-0.319076	0.199834	-0.0339566	-0.0349609	-0.487622	-0.45642	-0.862762	-0.372114	-0.47924	0.00340729	-0.71613	-0.218544	-0.59278	-0.478384	0.403183
-4.77882	-0.542259	-0.923375	0.0470578	-0.0812021	-0.20375	0.176869	-0.128887	0.384636	-0.495171	-0.312735	0.26357	-0.632747	-0.596637	0.211701	-0.159081	-0.0605026	-0.18714	-0.0927361	-0.274951	-0.453984	0.00882919	-0.478107	-0.240166	-0.162487	-6.46329e-05	-0.191082	-0.029768	0.0874652	-0.147339	-0.443307	-0.591689	-0.240116	-0.117365	0.146023	-0.318862	0.200882	-0.0339915	-0.035161	-0.489179	-0.456809	-0.86189	-0.373192	-0.47945	0.00221171	-0.715783	-0.216635	-0.592569	-0.477901	0.403641
-4.77783	-0.542792	-0.924222	0.0468645	-0.0827302	-0.203726	0.175797	-0.129071	0.383833	-0.49468	-0.313148	0.264717	-0.633711	-0.596843	0.212125	-0.158406	-0.0621241	-0.186555	-0.0935294	-0.27402	-0.453551	0.00772058	-0.478123	-0.238679	-0.160878	-0.000606586	-0.190694	-0.0304325	0.0877881	-0.147151	-0.443703	-0.591948	-0.240025	-0.115952	0.146708	-0.318647	0.201931	-0.0340259	-0.035344	-0.490722	-0.457203	-0.861013	-0.374269	-0.479661	0.00101361	-0.715428	-0.214723	-0.592356	-0.477413	0.404096
-4.77685	-0.543311	-0.925077	0.0466808	-0.084247	-0.203703	0.174716	-0.129242	0.383038	-0.494172	-0.313553	0.265854	-0.634675	-0.597041	0.212555	-0.157722	-0.0637359	-0.185967	-0.0943182	-0.273079	-0.453118	0.00662392	-0.478142	-0.237183	-0.159272	-0.00114818	-0.190298	-0.031095	0.0881145	-0.146954	-0.444102	-0.592196	-0.239946	-0.11455	0.147386	-0.318431	0.202979	-0.0340595	-0.0355098	-0.492253	-0.457603	-0.860131	-0.375346	-0.479874	-0.000186966	-0.715064	-0.212808	-0.592141	-0.47692	0.404546
-4.77587	-0.543817	-0.925941	0.0465069	-0.0857524	-0.203681	0.173626	-0.129397	0.38225	-0.49365	-0.313952	0.26698	-0.63564	-0.597232	0.212992	-0.157026	-0.0653376	-0.185378	-0.0951025	-0.27213	-0.452687	0.00553927	-0.478164	-0.235679	-0.157669	-0.00168938	-0.189895	-0.0317554	0.0884447	-0.146747	-0.444502	-0.592434	-0.239878	-0.113159	0.148056	-0.318215	0.204028	-0.0340926	-0.0356583	-0.493769	-0.458008	-0.859244	-0.376422	-0.480088	-0.00138993	-0.714692	-0.210891	-0.591923	-0.476421	0.404993
-4.77488	-0.544309	-0.926814	0.0463427	-0.0872463	-0.203659	0.172528	-0.129538	0.38147	-0.493111	-0.314344	0.268095	-0.636605	-0.597416	0.213436	-0.15632	-0.0669292	-0.184786	-0.0958826	-0.271172	-0.452257	0.00446667	-0.478189	-0.234167	-0.15607	-0.00223016	-0.189483	-0.0324137	0.0887786	-0.146531	-0.444904	-0.592662	-0.239821	-0.111781	0.148719	-0.317998	0.205077	-0.034125	-0.0357895	-0.495272	-0.458419	-0.858352	-0.377499	-0.480304	-0.0025952	-0.714311	-0.208971	-0.591702	-0.475918	0.405436
-4.7739	-0.544787	-0.927696	0.0461881	-0.0887286	-0.203639	0.171422	-0.129665	0.380697	-0.492557	-0.314729	0.269199	-0.637571	-0.597593	0.213886	-0.155604	-0.0685107	-0.184193	-0.0966583	-0.270206	-0.451828	0.00340618	-0.478217	-0.232646	-0.154474	-0.00277049	-0.189063	-0.0330698	0.0891164	-0.146306	-0.445308	-0.59288	-0.239775	-0.110415	0.149374	-0.31778	0.206125	-0.0341567	-0.0359033	-0.496761	-0.458835	-0.857455	-0.378574	-0.480522	-0.00380272	-0.713922	-0.207049	-0.591479	-0.47541	0.405874
-4.77292	-0.545251	-0.928587	0.0460431	-0.0901993	-0.203619	0.170307	-0.129777	0.379933	-0.491988	-0.315108	0.270293	-0.638537	-0.597763	0.214342	-0.154876	-0.0700819	-0.183598	-0.0974299	-0.26923	-0.451401	0.00235786	-0.478248	-0.231116	-0.152882	-0.00331033	-0.188636	-0.0337237	0.089458	-0.146071	-0.445714	-0.593087	-0.239741	-0.10906	0.150022	-0.317561	0.207174	-0.0341877	-0.0359995	-0.498235	-0.459256	-0.856554	-0.379649	-0.48074	-0.0050124	-0.713523	-0.205125	-0.591253	-0.474897	0.406308
-4.77193	-0.545702	-0.929485	0.0459078	-0.0916583	-0.203599	0.169183	-0.129875	0.379176	-0.491404	-0.315479	0.271375	-0.639503	-0.597925	0.214805	-0.154139	-0.0716427	-0.183001	-0.0981974	-0.268247	-0.450975	0.00132176	-0.478282	-0.229579	-0.151295	-0.00384965	-0.188201	-0.0343752	0.0898035	-0.145827	-0.446122	-0.593284	-0.239717	-0.107718	0.150662	-0.317341	0.208223	-0.0342181	-0.0360782	-0.499695	-0.459683	-0.855647	-0.380724	-0.48096	-0.00622418	-0.713116	-0.203199	-0.591025	-0.474379	0.406738
-4.77095	-0.546138	-0.930393	0.045782	-0.0931054	-0.203581	0.168051	-0.129959	0.378427	-0.490804	-0.315843	0.272447	-0.64047	-0.59808	0.215274	-0.15339	-0.073193	-0.182401	-0.0989609	-0.267254	-0.450551	0.000297932	-0.47832	-0.228034	-0.149711	-0.00438841	-0.187758	-0.0350244	0.0901529	-0.145574	-0.446532	-0.59347	-0.239705	-0.106388	0.151294	-0.31712	0.209271	-0.0342478	-0.0361392	-0.501141	-0.460115	-0.854736	-0.381797	-0.481181	-0.00743798	-0.712701	-0.20127	-0.590794	-0.473856	0.407163
-4.76997	-0.546561	-0.931309	0.0456659	-0.0945407	-0.203562	0.166911	-0.130029	0.377686	-0.490189	-0.316199	0.273508	-0.641437	-0.598228	0.215749	-0.152631	-0.0747327	-0.1818	-0.0997206	-0.266254	-0.450128	-0.000713573	-0.47836	-0.22648	-0.148132	-0.00492658	-0.187308	-0.0356712	0.0905064	-0.145311	-0.446945	-0.593646	-0.239703	-0.105071	0.151918	-0.316898	0.21032	-0.0342768	-0.0361825	-0.502571	-0.460553	-0.853821	-0.382869	-0.481404	-0.00865373	-0.712276	-0.19934	-0.59056	-0.473329	0.407584
-4.76899	-0.546969	-0.932233	0.0455592	-0.0959639	-0.203544	0.165762	-0.130084	0.376953	-0.489559	-0.316548	0.274558	-0.642405	-0.598369	0.216231	-0.151861	-0.0762618	-0.181198	-0.100476	-0.265245	-0.449707	-0.0017127	-0.478404	-0.224919	-0.146556	-0.00546414	-0.186851	-0.0363155	0.090864	-0.145039	-0.44736	-0.593812	-0.239713	-0.103765	0.152533	-0.316676	0.211368	-0.0343051	-0.0362079	-0.503987	-0.460996	-0.852901	-0.383941	-0.481627	-0.00987136	-0.711843	-0.197408	-0.590324	-0.472796	0.408
-4.768	-0.547363	-0.933165	0.0454621	-0.0973752	-0.203526	0.164605	-0.130126	0.376228	-0.488915	-0.31689	0.275597	-0.643372	-0.598502	0.216719	-0.151081	-0.0777802	-0.180593	-0.101228	-0.264228	-0.449288	-0.0026994	-0.478452	-0.223351	-0.144986	-0.00600103	-0.186385	-0.0369572	0.0912256	-0.144757	-0.447778	-0.593967	-0.239734	-0.102472	0.153141	-0.316453	0.212417	-0.0343327	-0.0362156	-0.505387	-0.461444	-0.851976	-0.385011	-0.481851	-0.0110908	-0.711401	-0.195475	-0.590085	-0.472259	0.408411
-4.76702	-0.547743	-0.934105	0.0453744	-0.0987743	-0.203508	0.16344	-0.130153	0.37551	-0.488255	-0.317224	0.276624	-0.64434	-0.598627	0.217213	-0.150289	-0.0792876	-0.179987	-0.101977	-0.263203	-0.44887	-0.00367363	-0.478503	-0.221775	-0.143419	-0.00653723	-0.185913	-0.0375964	0.0915914	-0.144467	-0.448198	-0.594112	-0.239765	-0.101191	0.15374	-0.316229	0.213465	-0.0343595	-0.0362052	-0.506772	-0.461898	-0.851048	-0.38608	-0.482076	-0.012312	-0.71095	-0.19354	-0.589844	-0.471718	0.408818
-4.76604	-0.548109	-0.935053	0.0452962	-0.100161	-0.203491	0.162266	-0.130166	0.374801	-0.487581	-0.317551	0.277641	-0.645308	-0.598746	0.217714	-0.149488	-0.0807842	-0.179378	-0.102722	-0.26217	-0.448454	-0.00463532	-0.478557	-0.220191	-0.141858	-0.00707271	-0.185433	-0.038233	0.0919614	-0.144166	-0.448621	-0.594245	-0.239808	-0.0999232	0.15433	-0.316004	0.214514	-0.0343857	-0.0361769	-0.508142	-0.462356	-0.850115	-0.387148	-0.482302	-0.0135348	-0.71049	-0.191604	-0.5896	-0.471171	0.40922
-4.76505	-0.54846	-0.936009	0.0452274	-0.101536	-0.203473	0.161084	-0.130165	0.3741	-0.486892	-0.31787	0.278646	-0.646276	-0.598856	0.21822	-0.148675	-0.0822697	-0.178768	-0.103463	-0.261129	-0.448039	-0.00558444	-0.478615	-0.2186	-0.140301	-0.00760742	-0.184946	-0.0388668	0.0923356	-0.143857	-0.449046	-0.594369	-0.239861	-0.0986675	0.154912	-0.315778	0.215562	-0.0344112	-0.0361306	-0.509496	-0.462821	-0.849178	-0.388214	-0.482528	-0.0147592	-0.710021	-0.189666	-0.589354	-0.470621	0.409616
-4.76407	-0.548797	-0.936973	0.045168	-0.102898	-0.203455	0.159894	-0.13015	0.373406	-0.48619	-0.318181	0.27964	-0.647244	-0.59896	0.218732	-0.147852	-0.0837441	-0.178156	-0.104201	-0.26008	-0.447627	-0.00652093	-0.478677	-0.217002	-0.13875	-0.00814134	-0.184452	-0.0394979	0.0927141	-0.143538	-0.449475	-0.594481	-0.239926	-0.0974243	0.155486	-0.315551	0.216611	-0.0344359	-0.0360661	-0.510834	-0.46329	-0.848237	-0.389278	-0.482755	-0.0159852	-0.709543	-0.187728	-0.589104	-0.470065	0.410008
-4.76309	-0.54912	-0.937945	0.0451179	-0.104248	-0.203436	0.158696	-0.130122	0.372721	-0.485472	-0.318484	0.280623	-0.648212	-0.599056	0.219251	-0.147018	-0.0852073	-0.177543	-0.104935	-0.259024	-0.447216	-0.00744475	-0.478743	-0.215397	-0.137203	-0.00867441	-0.183951	-0.0401263	0.0930969	-0.143209	-0.449906	-0.594583	-0.240001	-0.0961937	0.15605	-0.315324	0.217659	-0.0344599	-0.0359834	-0.512156	-0.463764	-0.847293	-0.390341	-0.482983	-0.0172125	-0.709056	-0.185788	-0.588852	-0.469506	0.410395
-4.7621	-0.549428	-0.938924	0.0450771	-0.105585	-0.203418	0.15749	-0.13008	0.372044	-0.484741	-0.318779	0.281595	-0.649179	-0.599144	0.219775	-0.146173	-0.0866593	-0.176927	-0.105667	-0.25796	-0.446807	-0.00835585	-0.478812	-0.213786	-0.135662	-0.00920662	-0.183442	-0.0407517	0.0934841	-0.142871	-0.450341	-0.594674	-0.240087	-0.0949758	0.156606	-0.315096	0.218707	-0.0344832	-0.0358826	-0.513461	-0.464244	-0.846344	-0.391402	-0.483211	-0.0184413	-0.708561	-0.183847	-0.588598	-0.468941	0.410776
-4.76112	-0.549722	-0.939911	0.0450456	-0.10691	-0.203399	0.156276	-0.130023	0.371375	-0.483995	-0.319066	0.282555	-0.650147	-0.599225	0.220305	-0.145317	-0.0880999	-0.17631	-0.106395	-0.256888	-0.446401	-0.00925417	-0.478886	-0.212167	-0.134125	-0.00973791	-0.182927	-0.0413743	0.0938757	-0.142524	-0.450778	-0.594754	-0.240183	-0.0937705	0.157152	-0.314866	0.219755	-0.0345057	-0.0357634	-0.51475	-0.464729	-0.845392	-0.392461	-0.483439	-0.0196714	-0.708056	-0.181906	-0.588341	-0.468373	0.411152
-4.76014	-0.550001	-0.940905	0.0450234	-0.108222	-0.203379	0.155054	-0.129954	0.370714	-0.483236	-0.319345	0.283504	-0.651115	-0.599298	0.220841	-0.144451	-0.089529	-0.175692	-0.10712	-0.255809	-0.445996	-0.0101397	-0.478963	-0.210542	-0.132595	-0.0102683	-0.182405	-0.0419939	0.0942718	-0.142168	-0.451219	-0.594824	-0.24029	-0.0925779	0.15769	-0.314637	0.220803	-0.0345275	-0.035626	-0.516023	-0.46522	-0.844436	-0.393518	-0.483668	-0.0209027	-0.707542	-0.179965	-0.588081	-0.4678	0.411523
-4.75916	-0.550265	-0.941906	0.0450103	-0.109522	-0.203358	0.153824	-0.12987	0.370061	-0.482463	-0.319616	0.284442	-0.652082	-0.599364	0.221383	-0.143574	-0.0909466	-0.175071	-0.107842	-0.254723	-0.445593	-0.0110123	-0.479044	-0.20891	-0.13107	-0.0107976	-0.181876	-0.0426105	0.0946723	-0.141801	-0.451663	-0.594882	-0.240408	-0.0913981	0.158218	-0.314406	0.221851	-0.0345486	-0.0354701	-0.517279	-0.465715	-0.843477	-0.394573	-0.483896	-0.0221353	-0.707019	-0.178022	-0.587818	-0.467223	0.411888
-4.75817	-0.550515	-0.942915	0.0450064	-0.110809	-0.203337	0.152586	-0.129773	0.369417	-0.481676	-0.319878	0.285368	-0.653049	-0.599422	0.221931	-0.142687	-0.0923526	-0.174449	-0.108562	-0.25363	-0.445192	-0.0118721	-0.47913	-0.207272	-0.12955	-0.011326	-0.181341	-0.0432241	0.0950773	-0.141426	-0.45211	-0.59493	-0.240536	-0.090231	0.158737	-0.314175	0.222899	-0.0345689	-0.0352958	-0.518517	-0.466215	-0.842514	-0.395626	-0.484125	-0.0233689	-0.706487	-0.17608	-0.587552	-0.466642	0.412248
-4.75719	-0.55075	-0.94393	0.0450115	-0.112082	-0.203315	0.15134	-0.129663	0.36878	-0.480875	-0.320132	0.286283	-0.654015	-0.599472	0.222484	-0.141789	-0.093747	-0.173826	-0.109278	-0.25253	-0.444793	-0.0127189	-0.479219	-0.205628	-0.128037	-0.0118532	-0.180799	-0.0438346	0.0954869	-0.141041	-0.452561	-0.594967	-0.240675	-0.0890767	0.159246	-0.313942	0.223947	-0.0345884	-0.0351031	-0.519739	-0.466721	-0.841548	-0.396676	-0.484354	-0.0246035	-0.705946	-0.174137	-0.587284	-0.466056	0.412602
-4.75621	-0.55097	-0.944953	0.0450258	-0.113344	-0.203292	0.150086	-0.129539	0.368152	-0.480061	-0.320378	0.287186	-0.654981	-0.599515	0.223042	-0.14088	-0.0951296	-0.1732	-0.109992	-0.251423	-0.444397	-0.0135526	-0.479313	-0.203977	-0.126529	-0.0123794	-0.18025	-0.0444419	0.095901	-0.140647	-0.453015	-0.594993	-0.240824	-0.0879353	0.159746	-0.313709	0.224994	-0.0346073	-0.0348919	-0.520943	-0.467231	-0.840579	-0.397724	-0.484582	-0.0258391	-0.705396	-0.172194	-0.587013	-0.465467	0.41295
-4.75522	-0.551175	-0.945982	0.045049	-0.114592	-0.203267	0.148825	-0.129402	0.367532	-0.479234	-0.320615	0.288078	-0.655947	-0.59955	0.223606	-0.13996	-0.0965003	-0.172574	-0.110703	-0.250309	-0.444002	-0.0143734	-0.479411	-0.202321	-0.125028	-0.0129045	-0.179695	-0.0450461	0.0963198	-0.140243	-0.453472	-0.595008	-0.240983	-0.0868068	0.160237	-0.313476	0.226041	-0.0346254	-0.0346621	-0.52213	-0.467747	-0.839606	-0.398769	-0.484811	-0.0270757	-0.704836	-0.170251	-0.586739	-0.464874	0.413293
-4.75424	-0.551365	-0.947018	0.0450813	-0.115827	-0.203242	0.147556	-0.129252	0.36692	-0.478394	-0.320844	0.288958	-0.656912	-0.599577	0.224176	-0.139029	-0.0978592	-0.171945	-0.111412	-0.249188	-0.44361	-0.0151811	-0.479513	-0.200659	-0.123533	-0.0134283	-0.179133	-0.045647	0.0967432	-0.13983	-0.453934	-0.595012	-0.241153	-0.0856911	0.160718	-0.313241	0.227089	-0.0346427	-0.0344138	-0.523299	-0.468268	-0.838631	-0.399811	-0.485039	-0.028313	-0.704268	-0.168308	-0.586463	-0.464276	0.41363
-4.75326	-0.551541	-0.948061	0.0451224	-0.117049	-0.203215	0.146279	-0.129088	0.366317	-0.477541	-0.321064	0.289827	-0.657877	-0.599596	0.224751	-0.138088	-0.0992061	-0.171315	-0.112118	-0.248061	-0.44322	-0.0159756	-0.47962	-0.198991	-0.122044	-0.013951	-0.178565	-0.0462446	0.0971712	-0.139408	-0.454399	-0.595005	-0.241333	-0.0845884	0.161189	-0.313006	0.228136	-0.0346593	-0.0341468	-0.52445	-0.468793	-0.837652	-0.40085	-0.485267	-0.0295512	-0.70369	-0.166365	-0.586184	-0.463675	0.413961
-4.75227	-0.551702	-0.94911	0.0451725	-0.118258	-0.203187	0.144995	-0.128912	0.365722	-0.476675	-0.321275	0.290684	-0.658841	-0.599608	0.225332	-0.137137	-0.100541	-0.170684	-0.112821	-0.246927	-0.442832	-0.016757	-0.479731	-0.197318	-0.120561	-0.0144724	-0.177991	-0.0468389	0.097604	-0.138976	-0.454868	-0.594987	-0.241524	-0.0834985	0.16165	-0.31277	0.229183	-0.0346752	-0.0338612	-0.525583	-0.469324	-0.836671	-0.401887	-0.485494	-0.03079	-0.703103	-0.164423	-0.585902	-0.463069	0.414286
-4.75129	-0.551847	-0.950166	0.0452313	-0.119454	-0.203157	0.143703	-0.128722	0.365135	-0.475796	-0.321478	0.291529	-0.659804	-0.599611	0.225917	-0.136174	-0.101864	-0.170051	-0.113523	-0.245787	-0.442446	-0.0175251	-0.479846	-0.195639	-0.119085	-0.0149925	-0.177411	-0.0474299	0.0980415	-0.138535	-0.45534	-0.594958	-0.241724	-0.0824217	0.162101	-0.312533	0.23023	-0.0346903	-0.0335569	-0.526698	-0.469859	-0.835687	-0.40292	-0.485721	-0.0320295	-0.702506	-0.162482	-0.585617	-0.46246	0.414604
-4.75031	-0.551978	-0.951228	0.0452989	-0.120637	-0.203126	0.142404	-0.128519	0.364557	-0.474904	-0.321672	0.292363	-0.660767	-0.599607	0.226508	-0.135201	-0.103174	-0.169417	-0.114222	-0.244641	-0.442063	-0.01828	-0.479966	-0.193954	-0.117616	-0.0155112	-0.176825	-0.0480174	0.0984837	-0.138085	-0.455817	-0.594918	-0.241934	-0.0813578	0.162542	-0.312296	0.231276	-0.0347046	-0.0332339	-0.527795	-0.470399	-0.8347	-0.403951	-0.485948	-0.0332695	-0.701901	-0.160541	-0.585329	-0.461848	0.414917
-4.74932	-0.552093	-0.952295	0.0453753	-0.121806	-0.203093	0.141097	-0.128304	0.363987	-0.474	-0.321856	0.293186	-0.661729	-0.599595	0.227104	-0.134217	-0.104473	-0.168781	-0.114919	-0.243488	-0.441682	-0.0190217	-0.480091	-0.192265	-0.116154	-0.0160286	-0.176232	-0.0486014	0.0989307	-0.137626	-0.456297	-0.594866	-0.242155	-0.0803069	0.162973	-0.312058	0.232323	-0.0347183	-0.0328922	-0.528873	-0.470944	-0.833711	-0.404977	-0.486173	-0.0345101	-0.701286	-0.1586	-0.585038	-0.461231	0.415223
-4.74834	-0.552194	-0.953369	0.0454603	-0.122962	-0.203058	0.139783	-0.128076	0.363426	-0.473084	-0.322032	0.293996	-0.66269	-0.599576	0.227705	-0.133223	-0.105759	-0.168144	-0.115614	-0.24233	-0.441304	-0.01975	-0.48022	-0.190571	-0.114699	-0.0165446	-0.175634	-0.049182	0.0993825	-0.137157	-0.456782	-0.594804	-0.242385	-0.079269	0.163394	-0.31182	0.233369	-0.0347311	-0.0325317	-0.529932	-0.471494	-0.83272	-0.406001	-0.486398	-0.0357511	-0.700661	-0.156661	-0.584745	-0.460611	0.415523
-4.74736	-0.552279	-0.954449	0.045554	-0.124105	-0.203021	0.138462	-0.127835	0.362873	-0.472155	-0.322199	0.294795	-0.66365	-0.599548	0.228311	-0.132218	-0.107032	-0.167506	-0.116307	-0.241166	-0.440928	-0.0204649	-0.480354	-0.188871	-0.11325	-0.0170591	-0.17503	-0.049759	0.0998392	-0.136678	-0.457271	-0.59473	-0.242625	-0.0782441	0.163804	-0.31158	0.234415	-0.0347433	-0.0321525	-0.530973	-0.472049	-0.831726	-0.407021	-0.486622	-0.0369925	-0.700028	-0.154722	-0.584449	-0.459987	0.415817
-4.74638	-0.552349	-0.955535	0.0456562	-0.125235	-0.202982	0.137133	-0.127581	0.362328	-0.471215	-0.322357	0.295583	-0.66461	-0.599512	0.228922	-0.131202	-0.108294	-0.166866	-0.116998	-0.239996	-0.440554	-0.0211664	-0.480493	-0.187167	-0.111809	-0.0175721	-0.17442	-0.0503325	0.100301	-0.136191	-0.457764	-0.594646	-0.242875	-0.0772323	0.164205	-0.311341	0.235461	-0.0347547	-0.0317544	-0.531994	-0.472608	-0.830729	-0.408037	-0.486844	-0.0382342	-0.699385	-0.152785	-0.58415	-0.45936	0.416105
-4.74539	-0.552404	-0.956626	0.0457669	-0.126351	-0.202941	0.135797	-0.127315	0.361792	-0.470262	-0.322505	0.296358	-0.665568	-0.599468	0.229537	-0.130176	-0.109543	-0.166225	-0.117688	-0.23882	-0.440182	-0.0218545	-0.480636	-0.185459	-0.110376	-0.0180836	-0.173805	-0.0509023	0.100767	-0.135694	-0.458261	-0.59455	-0.243135	-0.0762334	0.164594	-0.3111	0.236506	-0.0347654	-0.0313376	-0.532996	-0.473172	-0.829731	-0.409049	-0.487066	-0.0394761	-0.698732	-0.150849	-0.583848	-0.458729	0.416385
-4.74441	-0.552444	-0.957723	0.0458861	-0.127453	-0.202898	0.134454	-0.127037	0.361265	-0.469298	-0.322645	0.297122	-0.666526	-0.599416	0.230158	-0.129139	-0.110779	-0.165582	-0.118375	-0.237639	-0.439814	-0.0225291	-0.480784	-0.183745	-0.108949	-0.0185935	-0.173184	-0.0514685	0.101238	-0.135189	-0.458762	-0.594443	-0.243404	-0.0752476	0.164974	-0.310859	0.237552	-0.0347753	-0.0309019	-0.533979	-0.47374	-0.82873	-0.410058	-0.487287	-0.0407183	-0.69807	-0.148915	-0.583543	-0.458095	0.41666
-4.74343	-0.552469	-0.958825	0.0460136	-0.128543	-0.202852	0.133104	-0.126746	0.360746	-0.468322	-0.322775	0.297874	-0.667482	-0.599357	0.230783	-0.128092	-0.112003	-0.164939	-0.119061	-0.236452	-0.439447	-0.0231901	-0.480937	-0.182028	-0.107531	-0.0191018	-0.172558	-0.0520309	0.101714	-0.134673	-0.459268	-0.594325	-0.243683	-0.0742749	0.165342	-0.310618	0.238597	-0.0347845	-0.0304474	-0.534943	-0.474313	-0.827728	-0.411062	-0.487506	-0.0419606	-0.697399	-0.146981	-0.583235	-0.457457	0.416927
-4.74244	-0.552478	-0.959932	0.0461495	-0.129618	-0.202804	0.131747	-0.126443	0.360236	-0.467335	-0.322896	0.298615	-0.668437	-0.599289	0.231413	-0.127034	-0.113214	-0.164294	-0.119746	-0.235261	-0.439083	-0.0238377	-0.481095	-0.180306	-0.10612	-0.0196084	-0.171926	-0.0525897	0.102195	-0.134149	-0.459779	-0.594195	-0.243971	-0.0733152	0.1657	-0.310376	0.239642	-0.034793	-0.0299741	-0.535886	-0.474891	-0.826724	-0.412062	-0.487724	-0.0432029	-0.696718	-0.14505	-0.582925	-0.456817	0.417188
-4.74146	-0.552472	-0.961045	0.0462936	-0.13068	-0.202753	0.130383	-0.126128	0.359734	-0.466337	-0.323007	0.299343	-0.669391	-0.599213	0.232047	-0.125965	-0.114412	-0.163648	-0.120429	-0.234064	-0.438722	-0.0244716	-0.481258	-0.17858	-0.104717	-0.0201133	-0.171289	-0.0531446	0.102681	-0.133616	-0.460294	-0.594054	-0.244269	-0.0723685	0.166047	-0.310133	0.240686	-0.0348007	-0.0294819	-0.53681	-0.475473	-0.825718	-0.413058	-0.48794	-0.0444453	-0.696028	-0.14312	-0.582611	-0.456173	0.417442
-4.74048	-0.552451	-0.962162	0.046446	-0.131729	-0.2027	0.129012	-0.125801	0.359241	-0.465327	-0.323109	0.30006	-0.670344	-0.599128	0.232686	-0.124886	-0.115598	-0.163	-0.12111	-0.232862	-0.438363	-0.025092	-0.481425	-0.176851	-0.103321	-0.0206165	-0.170646	-0.0536958	0.103172	-0.133073	-0.460813	-0.593902	-0.244576	-0.0714349	0.166384	-0.30989	0.24173	-0.0348078	-0.0289709	-0.537714	-0.476059	-0.82471	-0.414049	-0.488155	-0.0456876	-0.695328	-0.141192	-0.582295	-0.455525	0.41769
-4.73949	-0.552414	-0.963285	0.0466065	-0.132764	-0.202643	0.127634	-0.125462	0.358757	-0.464306	-0.323202	0.300765	-0.671296	-0.599036	0.233329	-0.123797	-0.11677	-0.162352	-0.12179	-0.231655	-0.438007	-0.0256986	-0.481598	-0.175117	-0.101934	-0.0211179	-0.169999	-0.0542431	0.103668	-0.132522	-0.461337	-0.593739	-0.244892	-0.0705143	0.166709	-0.309646	0.242774	-0.0348141	-0.028441	-0.538597	-0.47665	-0.823701	-0.415036	-0.488368	-0.0469298	-0.694619	-0.139266	-0.581976	-0.454875	0.41793
-4.73851	-0.552363	-0.964412	0.0467751	-0.133785	-0.202584	0.126249	-0.125111	0.358281	-0.463275	-0.323285	0.301458	-0.672246	-0.598935	0.233977	-0.122697	-0.11793	-0.161702	-0.122469	-0.230444	-0.437654	-0.0262916	-0.481776	-0.17338	-0.100555	-0.0216174	-0.169346	-0.0547866	0.104169	-0.131961	-0.461866	-0.593565	-0.245217	-0.0696067	0.167024	-0.309402	0.243818	-0.0348197	-0.0278923	-0.539461	-0.477245	-0.82269	-0.416018	-0.48858	-0.0481718	-0.6939	-0.137343	-0.581653	-0.454222	0.418163
-4.73753	-0.552295	-0.965543	0.0469517	-0.134792	-0.202522	0.124858	-0.124749	0.357814	-0.462233	-0.323359	0.30214	-0.673195	-0.598827	0.234629	-0.121587	-0.119077	-0.161052	-0.123147	-0.229228	-0.437303	-0.0268709	-0.481959	-0.171639	-0.0991848	-0.0221151	-0.168689	-0.0553262	0.104674	-0.131392	-0.462399	-0.593379	-0.245552	-0.0687121	0.167327	-0.309158	0.244862	-0.0348246	-0.0273247	-0.540304	-0.477844	-0.821678	-0.416996	-0.48879	-0.0494135	-0.693171	-0.135421	-0.581328	-0.453565	0.41839
-4.73655	-0.552213	-0.966679	0.0471362	-0.135786	-0.202457	0.12346	-0.124375	0.357356	-0.46118	-0.323423	0.302809	-0.674143	-0.59871	0.235285	-0.120466	-0.120212	-0.1604	-0.123824	-0.228008	-0.436955	-0.0274364	-0.482147	-0.169895	-0.0978226	-0.0226109	-0.168027	-0.0558618	0.105185	-0.130813	-0.462938	-0.593182	-0.245895	-0.0678306	0.16762	-0.308913	0.245905	-0.0348289	-0.0267383	-0.541126	-0.478447	-0.820665	-0.417968	-0.488997	-0.050655	-0.692433	-0.133502	-0.581	-0.452906	0.418609
-4.73556	-0.552115	-0.96782	0.0473287	-0.136766	-0.202388	0.122055	-0.123989	0.356906	-0.460117	-0.323477	0.303467	-0.675089	-0.598584	0.235945	-0.119335	-0.121333	-0.159748	-0.124499	-0.226783	-0.436609	-0.0279882	-0.48234	-0.168147	-0.096469	-0.0231047	-0.16736	-0.0563935	0.105701	-0.130225	-0.463481	-0.592974	-0.246247	-0.066962	0.167901	-0.308668	0.246948	-0.0348324	-0.0261331	-0.541927	-0.479055	-0.81965	-0.418935	-0.489203	-0.0518961	-0.691686	-0.131585	-0.580669	-0.452244	0.418821
-4.73458	-0.552001	-0.968964	0.0475289	-0.137732	-0.202317	0.120644	-0.123592	0.356466	-0.459044	-0.323522	0.304113	-0.676033	-0.598451	0.236609	-0.118193	-0.122441	-0.159094	-0.125174	-0.225555	-0.436266	-0.0285261	-0.482538	-0.166397	-0.0951241	-0.0235966	-0.166688	-0.0569211	0.106222	-0.129629	-0.464029	-0.592754	-0.246608	-0.0661065	0.168172	-0.308423	0.24799	-0.0348352	-0.025509	-0.542708	-0.479666	-0.818635	-0.419897	-0.489407	-0.0531369	-0.690929	-0.129671	-0.580335	-0.451579	0.419026
-4.7336	-0.551873	-0.970113	0.0477369	-0.138685	-0.202241	0.119227	-0.123184	0.356034	-0.45796	-0.323557	0.304747	-0.676976	-0.598309	0.237277	-0.117041	-0.123536	-0.15844	-0.125847	-0.224322	-0.435926	-0.0290502	-0.482741	-0.164643	-0.093788	-0.0240864	-0.166011	-0.0574447	0.106747	-0.129024	-0.464582	-0.592523	-0.246978	-0.0652639	0.16843	-0.308177	0.249032	-0.0348374	-0.0248661	-0.543467	-0.480282	-0.817618	-0.420854	-0.489608	-0.0543771	-0.690162	-0.12776	-0.579998	-0.450911	0.419224
-4.73261	-0.551729	-0.971265	0.0479526	-0.139623	-0.202163	0.117803	-0.122764	0.355611	-0.456867	-0.323582	0.30537	-0.677918	-0.598159	0.237949	-0.115879	-0.124618	-0.157784	-0.12652	-0.223085	-0.435588	-0.0295605	-0.48295	-0.162887	-0.0924607	-0.0245741	-0.16533	-0.0579643	0.107278	-0.128409	-0.46514	-0.592281	-0.247357	-0.0644343	0.168678	-0.307931	0.250074	-0.0348389	-0.0242044	-0.544206	-0.480901	-0.816601	-0.421806	-0.489807	-0.0556168	-0.689385	-0.125851	-0.579658	-0.450241	0.419414
-4.73163	-0.551569	-0.972421	0.0481759	-0.140548	-0.20208	0.116372	-0.122334	0.355197	-0.455764	-0.323597	0.30598	-0.678857	-0.598	0.238625	-0.114707	-0.125687	-0.157128	-0.127193	-0.221845	-0.435254	-0.0300568	-0.483163	-0.161128	-0.0911425	-0.0250597	-0.164645	-0.0584798	0.107814	-0.127786	-0.465703	-0.592028	-0.247744	-0.0636176	0.168914	-0.307684	0.251115	-0.0348397	-0.0235239	-0.544923	-0.481524	-0.815583	-0.422751	-0.490004	-0.0568559	-0.688599	-0.123946	-0.579315	-0.449568	0.419597
-4.73065	-0.551394	-0.973581	0.0484068	-0.141459	-0.201994	0.114936	-0.121893	0.354791	-0.454651	-0.323603	0.306579	-0.679795	-0.597833	0.239304	-0.113525	-0.126743	-0.156471	-0.127864	-0.220601	-0.434921	-0.0305393	-0.483382	-0.159366	-0.0898335	-0.0255431	-0.163955	-0.0589912	0.108354	-0.127154	-0.466271	-0.591763	-0.248139	-0.0628138	0.169139	-0.307438	0.252156	-0.0348399	-0.0228247	-0.545618	-0.482151	-0.814564	-0.423692	-0.490198	-0.0580944	-0.687804	-0.122043	-0.57897	-0.448893	0.419773
-4.72966	-0.551204	-0.974744	0.0486451	-0.142357	-0.201904	0.113493	-0.12144	0.354395	-0.453529	-0.323599	0.307166	-0.680732	-0.597657	0.239987	-0.112332	-0.127785	-0.155813	-0.128535	-0.219354	-0.434592	-0.0310077	-0.483607	-0.157602	-0.0885337	-0.0260244	-0.163261	-0.0594985	0.1089	-0.126514	-0.466844	-0.591487	-0.248542	-0.0620229	0.169353	-0.307191	0.253197	-0.0348394	-0.0221067	-0.546292	-0.482782	-0.813545	-0.424626	-0.49039	-0.0593322	-0.686998	-0.120144	-0.578621	-0.448215	0.419941
-4.72868	-0.550998	-0.97591	0.0488908	-0.14324	-0.20181	0.112044	-0.120977	0.354008	-0.452398	-0.323584	0.307741	-0.681666	-0.597473	0.240674	-0.111129	-0.128814	-0.155154	-0.129205	-0.218103	-0.434265	-0.0314623	-0.483836	-0.155836	-0.0872433	-0.0265033	-0.162563	-0.0600016	0.10945	-0.125865	-0.467423	-0.5912	-0.248954	-0.0612448	0.169555	-0.306944	0.254237	-0.0348383	-0.0213701	-0.546944	-0.483417	-0.812526	-0.425554	-0.490579	-0.0605693	-0.686183	-0.118248	-0.578269	-0.447534	0.420101
-4.7277	-0.550776	-0.97708	0.0491439	-0.144109	-0.201712	0.110589	-0.120504	0.353629	-0.451258	-0.32356	0.308305	-0.682598	-0.59728	0.241364	-0.109916	-0.12983	-0.154495	-0.129875	-0.216849	-0.433942	-0.0319028	-0.484071	-0.154067	-0.0859623	-0.02698	-0.161861	-0.0605005	0.110006	-0.125207	-0.468006	-0.590901	-0.249374	-0.0604796	0.169745	-0.306697	0.255277	-0.0348366	-0.0206147	-0.547575	-0.484055	-0.811506	-0.426477	-0.490765	-0.0618055	-0.685358	-0.116356	-0.577914	-0.446852	0.420254
-4.72671	-0.55054	-0.978252	0.0494042	-0.144965	-0.20161	0.109129	-0.12002	0.353259	-0.450108	-0.323526	0.308856	-0.683529	-0.597079	0.242057	-0.108693	-0.130833	-0.153835	-0.130545	-0.215592	-0.433621	-0.0323293	-0.484311	-0.152297	-0.084691	-0.0274544	-0.161155	-0.0609952	0.110567	-0.12454	-0.468595	-0.590591	-0.249802	-0.0597273	0.169924	-0.30645	0.256316	-0.0348342	-0.0198407	-0.548183	-0.484697	-0.810485	-0.427393	-0.490948	-0.0630409	-0.684524	-0.114467	-0.577556	-0.446167	0.4204
-4.72573	-0.550288	-0.979428	0.0496716	-0.145807	-0.201503	0.107662	-0.119526	0.352899	-0.44895	-0.323482	0.309396	-0.684457	-0.59687	0.242753	-0.107459	-0.131823	-0.153174	-0.131214	-0.214332	-0.433302	-0.0327418	-0.484557	-0.150524	-0.0834294	-0.0279264	-0.160445	-0.0614857	0.111132	-0.123865	-0.46919	-0.59027	-0.250238	-0.0589877	0.170091	-0.306203	0.257355	-0.0348312	-0.019048	-0.548769	-0.485342	-0.809465	-0.428302	-0.491129	-0.0642753	-0.68368	-0.112582	-0.577195	-0.445479	0.420537
-4.72475	-0.55002	-0.980606	0.0499462	-0.146634	-0.201393	0.106189	-0.119021	0.352547	-0.447784	-0.323428	0.309924	-0.685384	-0.596651	0.243453	-0.106216	-0.132799	-0.152513	-0.131883	-0.21307	-0.432987	-0.0331402	-0.484808	-0.14875	-0.0821776	-0.028396	-0.159731	-0.061972	0.111703	-0.123181	-0.469789	-0.589938	-0.250682	-0.0582608	0.170246	-0.305956	0.258393	-0.0348276	-0.0182367	-0.549332	-0.48599	-0.808445	-0.429206	-0.491306	-0.0655088	-0.682826	-0.1107	-0.576831	-0.44479	0.420667
-4.72377	-0.549737	-0.981786	0.0502278	-0.147448	-0.201277	0.104711	-0.118506	0.352205	-0.446609	-0.323364	0.310441	-0.686308	-0.596425	0.244156	-0.104963	-0.133761	-0.151851	-0.132552	-0.211805	-0.432674	-0.0335246	-0.485064	-0.146975	-0.0809358	-0.0288631	-0.159014	-0.062454	0.112278	-0.122489	-0.470394	-0.589594	-0.251134	-0.0575467	0.17039	-0.305709	0.259431	-0.0348234	-0.0174069	-0.549874	-0.486642	-0.807424	-0.430103	-0.49148	-0.0667413	-0.681962	-0.108823	-0.576465	-0.444098	0.420789
-4.72278	-0.549439	-0.982969	0.0505163	-0.148248	-0.201158	0.103227	-0.117982	0.351871	-0.445425	-0.32329	0.310945	-0.68723	-0.596189	0.244862	-0.1037	-0.134711	-0.151189	-0.13322	-0.210538	-0.432364	-0.0338948	-0.485326	-0.145197	-0.079704	-0.0293278	-0.158292	-0.0629316	0.112859	-0.121789	-0.471005	-0.589239	-0.251593	-0.0568452	0.170521	-0.305461	0.260469	-0.0348187	-0.0165586	-0.550393	-0.487297	-0.806404	-0.430993	-0.491651	-0.0679727	-0.681088	-0.106949	-0.576095	-0.443405	0.420904
-4.7218	-0.549125	-0.984154	0.0508117	-0.149034	-0.201033	0.101737	-0.117447	0.351547	-0.444234	-0.323206	0.311438	-0.68815	-0.595945	0.245571	-0.102427	-0.135647	-0.150526	-0.133889	-0.209268	-0.432057	-0.0342509	-0.485593	-0.143419	-0.0784824	-0.0297899	-0.157568	-0.063405	0.113444	-0.12108	-0.471621	-0.588873	-0.252059	-0.0561564	0.170642	-0.305214	0.261506	-0.0348133	-0.0156918	-0.550889	-0.487955	-0.805384	-0.431876	-0.491819	-0.0692029	-0.680205	-0.10508	-0.575722	-0.442709	0.42101
-4.72082	-0.548796	-0.985342	0.0511139	-0.149807	-0.200904	0.100242	-0.116903	0.351231	-0.443034	-0.323112	0.311919	-0.689068	-0.595692	0.246283	-0.101144	-0.136569	-0.149863	-0.134557	-0.207996	-0.431753	-0.0345929	-0.485865	-0.141639	-0.0772711	-0.0302494	-0.15684	-0.0638741	0.114034	-0.120363	-0.472242	-0.588496	-0.252534	-0.0554802	0.17075	-0.304967	0.262543	-0.0348074	-0.0148066	-0.551362	-0.488616	-0.804365	-0.432752	-0.491983	-0.070432	-0.679312	-0.103215	-0.575346	-0.442012	0.421108
-4.71983	-0.548451	-0.986531	0.0514228	-0.150565	-0.20077	0.0987419	-0.11635	0.350925	-0.441827	-0.323008	0.312388	-0.689984	-0.59543	0.246998	-0.0998517	-0.137478	-0.149199	-0.135226	-0.206722	-0.431452	-0.0349207	-0.486143	-0.139859	-0.0760701	-0.0307063	-0.156108	-0.0643388	0.114629	-0.119637	-0.472869	-0.588108	-0.253015	-0.0548166	0.170846	-0.304721	0.263579	-0.0348009	-0.0139029	-0.551812	-0.489281	-0.803346	-0.433621	-0.492144	-0.0716598	-0.678409	-0.101355	-0.574967	-0.441313	0.421199
-4.71885	-0.548091	-0.987722	0.0517384	-0.151309	-0.200631	0.0972361	-0.115787	0.350628	-0.440613	-0.322893	0.312846	-0.690897	-0.59516	0.247715	-0.0985494	-0.138374	-0.148535	-0.135894	-0.205447	-0.431153	-0.0352344	-0.486426	-0.138077	-0.0748797	-0.0311605	-0.155373	-0.0647992	0.11523	-0.118904	-0.473502	-0.587708	-0.253503	-0.0541654	0.17093	-0.304474	0.264614	-0.0347939	-0.012981	-0.55224	-0.489948	-0.802327	-0.434483	-0.4923	-0.0728864	-0.677497	-0.0994986	-0.574585	-0.440612	0.421282
-4.71787	-0.547716	-0.988914	0.0520604	-0.15204	-0.200487	0.095725	-0.115214	0.35034	-0.43939	-0.322769	0.313292	-0.691807	-0.594881	0.248435	-0.0972373	-0.139256	-0.14787	-0.136563	-0.204169	-0.430857	-0.0355338	-0.486714	-0.136295	-0.0736998	-0.031612	-0.154635	-0.0652552	0.115834	-0.118162	-0.47414	-0.587297	-0.253999	-0.0535268	0.171003	-0.304228	0.265649	-0.0347864	-0.0120407	-0.552644	-0.490618	-0.801309	-0.435338	-0.492454	-0.0741116	-0.676575	-0.0976471	-0.5742	-0.439909	0.421356
-4.71688	-0.547325	-0.990108	0.052389	-0.152756	-0.200337	0.0942087	-0.114633	0.350061	-0.438161	-0.322634	0.313726	-0.692716	-0.594593	0.249157	-0.0959156	-0.140125	-0.147206	-0.137232	-0.20289	-0.430564	-0.0358191	-0.487008	-0.134512	-0.0725306	-0.0320608	-0.153895	-0.0657068	0.116444	-0.117412	-0.474783	-0.586875	-0.254502	-0.0529006	0.171063	-0.303982	0.266684	-0.0347784	-0.0110822	-0.553025	-0.491291	-0.800292	-0.436185	-0.492603	-0.0753354	-0.675642	-0.0958004	-0.573812	-0.439205	0.421422
-4.7159	-0.546919	-0.991303	0.0527239	-0.153459	-0.200183	0.0926873	-0.114042	0.349791	-0.436925	-0.322489	0.314149	-0.693621	-0.594296	0.249882	-0.0945842	-0.14098	-0.146541	-0.137902	-0.20161	-0.430274	-0.0360901	-0.487308	-0.132728	-0.0713723	-0.0325068	-0.153151	-0.0661541	0.117059	-0.116654	-0.475433	-0.586442	-0.255011	-0.0522868	0.171112	-0.303736	0.267718	-0.0347698	-0.0101056	-0.553382	-0.491966	-0.799276	-0.437024	-0.492749	-0.0765578	-0.6747	-0.0939585	-0.573421	-0.438499	0.421481
-4.71492	-0.546498	-0.992499	0.0530652	-0.154148	-0.200023	0.0911609	-0.113443	0.349531	-0.435681	-0.322334	0.31456	-0.694524	-0.59399	0.250609	-0.0932433	-0.141821	-0.145876	-0.138571	-0.200329	-0.429987	-0.0363469	-0.487612	-0.130944	-0.0702248	-0.03295	-0.152404	-0.0665969	0.117678	-0.115888	-0.476088	-0.585998	-0.255527	-0.0516853	0.171148	-0.303491	0.268751	-0.0347607	-0.00911078	-0.553716	-0.492644	-0.79826	-0.437856	-0.49289	-0.0777787	-0.673749	-0.0921216	-0.573027	-0.437791	0.421531
-4.71394	-0.546062	-0.993696	0.0534127	-0.154823	-0.199858	0.0896296	-0.112835	0.34928	-0.434431	-0.322169	0.31496	-0.695425	-0.593676	0.251339	-0.0918929	-0.142649	-0.145211	-0.139241	-0.199046	-0.429702	-0.0365895	-0.487922	-0.12916	-0.0690884	-0.0333903	-0.151654	-0.0670353	0.118302	-0.115115	-0.476749	-0.585542	-0.25605	-0.0510961	0.171173	-0.303246	0.269784	-0.0347512	-0.00809792	-0.554027	-0.493325	-0.797246	-0.43868	-0.493028	-0.0789981	-0.672787	-0.0902897	-0.57263	-0.437083	0.421573
-4.71295	-0.54561	-0.994894	0.0537663	-0.155484	-0.199687	0.0880934	-0.112218	0.349037	-0.433175	-0.321993	0.315347	-0.696323	-0.593352	0.25207	-0.0905331	-0.143464	-0.144545	-0.139912	-0.197763	-0.429421	-0.0368178	-0.488238	-0.127376	-0.0679631	-0.0338277	-0.150902	-0.0674693	0.118931	-0.114333	-0.477415	-0.585076	-0.25658	-0.0505192	0.171185	-0.303001	0.270816	-0.0347412	-0.00706707	-0.554313	-0.494008	-0.796233	-0.439496	-0.493161	-0.0802159	-0.671815	-0.0884631	-0.57223	-0.436372	0.421607
-4.71197	-0.545143	-0.996093	0.0541259	-0.156132	-0.19951	0.0865525	-0.111593	0.348804	-0.431912	-0.321808	0.315724	-0.697218	-0.59302	0.252804	-0.0891638	-0.144265	-0.14388	-0.140583	-0.196479	-0.429142	-0.0370319	-0.488559	-0.125591	-0.066849	-0.0342622	-0.150147	-0.0678989	0.119565	-0.113543	-0.478088	-0.584598	-0.257115	-0.0499544	0.171186	-0.302757	0.271848	-0.0347307	-0.00601828	-0.554576	-0.494693	-0.795221	-0.440304	-0.49329	-0.0814321	-0.670834	-0.0866417	-0.571826	-0.435661	0.421632
-4.71099	-0.544661	-0.997291	0.0544916	-0.156765	-0.199328	0.0850069	-0.110959	0.348581	-0.430642	-0.321612	0.316089	-0.69811	-0.592678	0.25354	-0.0877852	-0.145053	-0.143215	-0.141254	-0.195194	-0.428866	-0.0372316	-0.488885	-0.123807	-0.0657462	-0.0346937	-0.149389	-0.068324	0.120203	-0.112746	-0.478766	-0.58411	-0.257657	-0.0494018	0.171174	-0.302513	0.272879	-0.0347198	-0.00495162	-0.554815	-0.49538	-0.794211	-0.441103	-0.493414	-0.0826466	-0.669843	-0.0848258	-0.57142	-0.434948	0.421649
-4.71	-0.544163	-0.998491	0.0548631	-0.157385	-0.19914	0.0834567	-0.110317	0.348366	-0.429367	-0.321406	0.316442	-0.699	-0.592328	0.254278	-0.0863973	-0.145827	-0.142549	-0.141927	-0.193909	-0.428593	-0.0374171	-0.489216	-0.122024	-0.0646548	-0.0351221	-0.148629	-0.0687446	0.120847	-0.111941	-0.479449	-0.58361	-0.258206	-0.0488613	0.17115	-0.30227	0.273909	-0.0347085	-0.00386716	-0.55503	-0.49607	-0.793202	-0.441894	-0.493534	-0.0838593	-0.668842	-0.0830153	-0.571011	-0.434235	0.421658
-4.70902	-0.543651	-0.99969	0.0552404	-0.157991	-0.198946	0.081902	-0.109668	0.348161	-0.428086	-0.32119	0.316784	-0.699887	-0.591969	0.255017	-0.0850001	-0.146587	-0.141884	-0.142599	-0.192624	-0.428322	-0.0375883	-0.489553	-0.12024	-0.0635749	-0.0355475	-0.147867	-0.0691609	0.121494	-0.111129	-0.480139	-0.5831	-0.25876	-0.0483327	0.171114	-0.302028	0.274939	-0.0346967	-0.00276498	-0.555221	-0.496762	-0.792194	-0.442677	-0.49365	-0.0850703	-0.667831	-0.0812105	-0.570599	-0.43352	0.421659
-4.70804	-0.543123	-1.00089	0.0556234	-0.158584	-0.198746	0.0803429	-0.10901	0.347965	-0.426799	-0.320964	0.317114	-0.700771	-0.5916	0.255759	-0.0835938	-0.147335	-0.141219	-0.143273	-0.191338	-0.428055	-0.0377452	-0.489896	-0.118458	-0.0625067	-0.0359698	-0.147103	-0.0695726	0.122147	-0.110309	-0.480835	-0.582579	-0.25932	-0.0478162	0.171066	-0.301786	0.275968	-0.0346846	-0.00164514	-0.555388	-0.497455	-0.791188	-0.443451	-0.493761	-0.0862795	-0.666811	-0.0794115	-0.570183	-0.432804	0.421651
-4.70705	-0.54258	-1.00209	0.0560121	-0.159162	-0.198541	0.0787794	-0.108345	0.347779	-0.425507	-0.320727	0.317433	-0.701651	-0.591223	0.256502	-0.0821784	-0.148068	-0.140554	-0.143947	-0.190052	-0.42779	-0.0378877	-0.490243	-0.116675	-0.0614501	-0.0363889	-0.146336	-0.0699799	0.122804	-0.109481	-0.481536	-0.582046	-0.259886	-0.0473115	0.171005	-0.301546	0.276996	-0.034672	-0.000507722	-0.55553	-0.498151	-0.790184	-0.444217	-0.493867	-0.0874868	-0.66578	-0.0776183	-0.569765	-0.432087	0.421635
-4.70607	-0.542023	-1.00329	0.0564063	-0.159727	-0.198328	0.0772118	-0.107672	0.347601	-0.424209	-0.320481	0.317741	-0.702529	-0.590836	0.257246	-0.0807538	-0.148788	-0.139889	-0.144622	-0.188767	-0.427528	-0.038016	-0.490596	-0.114894	-0.0604054	-0.0368049	-0.145567	-0.0703827	0.123465	-0.108646	-0.482243	-0.581503	-0.260458	-0.0468187	0.170933	-0.301305	0.278024	-0.0346591	0.000647191	-0.555648	-0.498848	-0.789182	-0.444973	-0.493968	-0.0886922	-0.66474	-0.075831	-0.569343	-0.431369	0.42161
-4.70509	-0.54145	-1.00448	0.0568059	-0.160279	-0.19811	0.07564	-0.106991	0.347433	-0.422906	-0.320224	0.318037	-0.703404	-0.59044	0.257992	-0.0793203	-0.149495	-0.139225	-0.145298	-0.187482	-0.427269	-0.0381299	-0.490954	-0.113114	-0.0593726	-0.0372176	-0.144796	-0.0707811	0.124131	-0.107804	-0.482956	-0.580949	-0.261035	-0.0463376	0.170848	-0.301066	0.279051	-0.0346458	0.00181952	-0.555742	-0.499547	-0.788181	-0.445721	-0.494065	-0.0898956	-0.66369	-0.0740498	-0.568919	-0.43065	0.421577
-4.7041	-0.540862	-1.00568	0.0572109	-0.160816	-0.197885	0.0740642	-0.106304	0.347274	-0.421598	-0.319957	0.318322	-0.704276	-0.590035	0.25874	-0.0778778	-0.150188	-0.138561	-0.145975	-0.186197	-0.427012	-0.0382296	-0.491317	-0.111335	-0.0583517	-0.0376271	-0.144024	-0.071175	0.124802	-0.106955	-0.483675	-0.580385	-0.261617	-0.0458682	0.170752	-0.300827	0.280077	-0.0346322	0.00300919	-0.55581	-0.500248	-0.787183	-0.446459	-0.494156	-0.0910971	-0.66263	-0.0722748	-0.568492	-0.429931	0.421536
-4.70312	-0.540259	-1.00688	0.0576212	-0.16134	-0.197654	0.0724844	-0.105609	0.347125	-0.420286	-0.31968	0.318596	-0.705144	-0.589621	0.259489	-0.0764265	-0.150867	-0.137897	-0.146653	-0.184913	-0.426759	-0.0383149	-0.491686	-0.109557	-0.0573429	-0.0380333	-0.143249	-0.0715644	0.125476	-0.106098	-0.4844	-0.579809	-0.262205	-0.0454105	0.170643	-0.30059	0.281103	-0.0346182	0.0042161	-0.555855	-0.500949	-0.786187	-0.447189	-0.494242	-0.0922965	-0.66156	-0.070506	-0.568061	-0.429211	0.421486
-4.70214	-0.539642	-1.00807	0.0580367	-0.161851	-0.197417	0.0709007	-0.104908	0.346984	-0.418968	-0.319393	0.318858	-0.706009	-0.589198	0.260239	-0.0749663	-0.151533	-0.137234	-0.147331	-0.18363	-0.426508	-0.0383858	-0.492059	-0.10778	-0.0563463	-0.0384362	-0.142473	-0.0719493	0.126156	-0.105234	-0.48513	-0.579223	-0.262798	-0.0449644	0.170521	-0.300353	0.282128	-0.034604	0.00544017	-0.555874	-0.501653	-0.785193	-0.447908	-0.494323	-0.0934938	-0.66048	-0.0687436	-0.567628	-0.42849	0.421427
-4.70116	-0.539009	-1.00927	0.0584572	-0.162348	-0.197172	0.0693134	-0.104199	0.346854	-0.417646	-0.319096	0.319109	-0.706871	-0.588766	0.26099	-0.0734973	-0.152186	-0.136571	-0.148011	-0.182348	-0.42626	-0.0384425	-0.492438	-0.106005	-0.0553619	-0.0388357	-0.141695	-0.0723298	0.12684	-0.104363	-0.485867	-0.578626	-0.263397	-0.0445297	0.170388	-0.300118	0.283152	-0.0345894	0.00668132	-0.555869	-0.502357	-0.784201	-0.448619	-0.494399	-0.094689	-0.659391	-0.0669877	-0.567191	-0.427769	0.42136
-4.70017	-0.538362	-1.01046	0.0588828	-0.162831	-0.196921	0.0677223	-0.103484	0.346732	-0.41632	-0.318788	0.319349	-0.70773	-0.588324	0.261742	-0.0720197	-0.152825	-0.135909	-0.148692	-0.181067	-0.426014	-0.0384848	-0.492822	-0.104231	-0.0543899	-0.0392317	-0.140916	-0.0727058	0.127528	-0.103485	-0.486609	-0.578018	-0.264	-0.0441065	0.170243	-0.299883	0.284175	-0.0345745	0.00793944	-0.555839	-0.503063	-0.783211	-0.44932	-0.494469	-0.095882	-0.658292	-0.0652384	-0.566752	-0.427048	0.421285
-4.69919	-0.5377	-1.01165	0.0593133	-0.163302	-0.196664	0.0661277	-0.102762	0.34662	-0.41499	-0.318471	0.319578	-0.708585	-0.587873	0.262496	-0.0705334	-0.153451	-0.135247	-0.149373	-0.179787	-0.425771	-0.0385128	-0.493212	-0.10246	-0.0534303	-0.0396244	-0.140135	-0.0730774	0.12822	-0.102601	-0.487358	-0.5774	-0.264608	-0.0436947	0.170085	-0.29965	0.285198	-0.0345594	0.00921445	-0.555783	-0.50377	-0.782224	-0.450011	-0.494534	-0.0970728	-0.657182	-0.0634958	-0.566309	-0.426326	0.421201
-4.69821	-0.537023	-1.01284	0.0597486	-0.163758	-0.196399	0.0645296	-0.102035	0.346517	-0.413656	-0.318143	0.319796	-0.709437	-0.587413	0.26325	-0.0690386	-0.154063	-0.134586	-0.150056	-0.178509	-0.425532	-0.0385265	-0.493606	-0.10069	-0.0524832	-0.0400135	-0.139352	-0.0734445	0.128916	-0.101709	-0.488112	-0.576771	-0.26522	-0.0432941	0.169915	-0.299417	0.28622	-0.0345441	0.0105062	-0.555703	-0.504478	-0.78124	-0.450692	-0.494593	-0.0982614	-0.656063	-0.0617599	-0.565864	-0.425603	0.421108
-4.69722	-0.536332	-1.01403	0.0601886	-0.164201	-0.196128	0.0629282	-0.1013	0.346423	-0.412318	-0.317805	0.320003	-0.710285	-0.586943	0.264005	-0.0675353	-0.154662	-0.133925	-0.15074	-0.177232	-0.425294	-0.0385259	-0.494005	-0.0989216	-0.0515488	-0.0403992	-0.138569	-0.0738071	0.129617	-0.100811	-0.488872	-0.576132	-0.265837	-0.0429048	0.169733	-0.299186	0.287241	-0.0345285	0.0118147	-0.555598	-0.505187	-0.780258	-0.451364	-0.494646	-0.0994476	-0.654935	-0.060031	-0.565415	-0.424881	0.421007
-4.69624	-0.535626	-1.01521	0.0606333	-0.164631	-0.19585	0.0613235	-0.10056	0.346339	-0.410976	-0.317458	0.320199	-0.71113	-0.586465	0.264761	-0.0660236	-0.155248	-0.133266	-0.151425	-0.175957	-0.42506	-0.0385109	-0.494409	-0.0971557	-0.050627	-0.0407813	-0.137784	-0.0741653	0.130322	-0.099906	-0.489638	-0.575482	-0.266459	-0.0425266	0.169539	-0.298956	0.288261	-0.0345126	0.0131398	-0.555467	-0.505896	-0.779279	-0.452025	-0.494694	-0.100632	-0.653796	-0.0583091	-0.564964	-0.424158	0.420897
-4.69526	-0.534906	-1.01639	0.0610826	-0.165048	-0.195564	0.0597156	-0.0998144	0.346264	-0.409631	-0.3171	0.320383	-0.711972	-0.585976	0.265517	-0.0645035	-0.155821	-0.132607	-0.152112	-0.174684	-0.424828	-0.0384816	-0.494819	-0.095392	-0.0497179	-0.0411598	-0.136998	-0.0745191	0.131031	-0.0989945	-0.490411	-0.574822	-0.267084	-0.0421595	0.169332	-0.298728	0.289281	-0.0344966	0.0144813	-0.555312	-0.506606	-0.778303	-0.452676	-0.494736	-0.101813	-0.652648	-0.0565942	-0.564509	-0.423435	0.420779
-4.69427	-0.53417	-1.01757	0.0615363	-0.165452	-0.195272	0.0581047	-0.0990628	0.346198	-0.408283	-0.316733	0.320557	-0.712809	-0.585479	0.266274	-0.0629751	-0.15638	-0.131949	-0.152799	-0.173413	-0.424598	-0.0384381	-0.495233	-0.0936306	-0.0488217	-0.0415346	-0.136211	-0.0748685	0.131744	-0.0980765	-0.491188	-0.574151	-0.267714	-0.0418034	0.169114	-0.298501	0.290299	-0.0344804	0.0158393	-0.55513	-0.507317	-0.77733	-0.453317	-0.494772	-0.102992	-0.65149	-0.0548865	-0.564052	-0.422712	0.420652
-4.69329	-0.533421	-1.01875	0.0619943	-0.165842	-0.194972	0.0564908	-0.0983057	0.346142	-0.406932	-0.316355	0.32072	-0.713643	-0.584972	0.267032	-0.0614386	-0.156925	-0.131292	-0.153488	-0.172144	-0.424372	-0.0383802	-0.495652	-0.0918717	-0.0479385	-0.0419059	-0.135423	-0.0752134	0.132461	-0.0971521	-0.491972	-0.57347	-0.268348	-0.0414581	0.168883	-0.298275	0.291317	-0.034464	0.0172135	-0.554924	-0.508028	-0.77636	-0.453947	-0.494802	-0.104169	-0.650322	-0.0531861	-0.563591	-0.421988	0.420516
-4.69231	-0.532657	-1.01992	0.0624567	-0.166219	-0.194665	0.0548741	-0.0975432	0.346095	-0.405577	-0.315967	0.320872	-0.714474	-0.584456	0.26779	-0.0598938	-0.157458	-0.130636	-0.154178	-0.170877	-0.424148	-0.0383081	-0.496076	-0.0901154	-0.0470682	-0.0422734	-0.134635	-0.0755539	0.133182	-0.0962214	-0.492762	-0.572779	-0.268986	-0.0411237	0.168641	-0.298051	0.292334	-0.0344475	0.0186038	-0.554692	-0.508739	-0.775393	-0.454567	-0.494826	-0.105343	-0.649144	-0.0514932	-0.563128	-0.421265	0.420372
-4.69133	-0.531879	-1.0211	0.0629232	-0.166583	-0.194351	0.0532545	-0.0967756	0.346057	-0.40422	-0.31557	0.321014	-0.7153	-0.58393	0.268548	-0.0583411	-0.157977	-0.129981	-0.15487	-0.169613	-0.423926	-0.0382216	-0.496504	-0.0883617	-0.046211	-0.0426372	-0.133845	-0.07589	0.133907	-0.0952845	-0.493558	-0.572077	-0.269628	-0.0408001	0.168386	-0.297829	0.29335	-0.0344309	0.0200102	-0.554435	-0.509451	-0.774429	-0.455176	-0.494844	-0.106515	-0.647956	-0.0498076	-0.562661	-0.420543	0.420219
-4.69034	-0.531086	-1.02226	0.0633938	-0.166934	-0.194029	0.0516324	-0.0960029	0.346028	-0.402861	-0.315163	0.321144	-0.716123	-0.583395	0.269306	-0.0567803	-0.158483	-0.129327	-0.155563	-0.168352	-0.423708	-0.0381209	-0.496938	-0.0866109	-0.0453669	-0.0429972	-0.133055	-0.0762217	0.134636	-0.0943414	-0.494359	-0.571365	-0.270273	-0.0404871	0.168119	-0.297608	0.294365	-0.0344141	0.0214326	-0.554152	-0.510162	-0.773468	-0.455774	-0.494855	-0.107684	-0.646759	-0.0481297	-0.562192	-0.41982	0.420058
-4.68936	-0.530279	-1.02343	0.0638684	-0.167272	-0.1937	0.0500077	-0.0952254	0.346009	-0.401499	-0.314746	0.321264	-0.716942	-0.58285	0.270065	-0.0552116	-0.158976	-0.128674	-0.156257	-0.167094	-0.423491	-0.038006	-0.497376	-0.0848631	-0.044536	-0.0433535	-0.132264	-0.0765491	0.135369	-0.0933922	-0.495167	-0.570643	-0.270922	-0.0401847	0.16784	-0.297388	0.295379	-0.0343972	0.0228708	-0.553843	-0.510874	-0.772511	-0.456362	-0.49486	-0.10885	-0.645552	-0.0464594	-0.56172	-0.419098	0.419888
-4.68838	-0.529458	-1.02459	0.0643469	-0.167597	-0.193363	0.0483806	-0.0944431	0.345999	-0.400135	-0.314319	0.321374	-0.717757	-0.582296	0.270824	-0.0536351	-0.159456	-0.128022	-0.156952	-0.165838	-0.423278	-0.0378768	-0.497819	-0.0831182	-0.0437185	-0.0437059	-0.131473	-0.0768721	0.136105	-0.0924371	-0.49598	-0.569911	-0.271574	-0.0398927	0.16755	-0.297171	0.296392	-0.0343803	0.0243246	-0.553509	-0.511585	-0.771557	-0.456938	-0.494859	-0.110014	-0.644335	-0.0447969	-0.561245	-0.418375	0.419709
-4.68739	-0.528623	-1.02575	0.0648293	-0.16791	-0.193019	0.0467511	-0.0936564	0.345999	-0.398769	-0.313882	0.321472	-0.718568	-0.581732	0.271582	-0.0520508	-0.159923	-0.127372	-0.157649	-0.164586	-0.423067	-0.0377333	-0.498267	-0.0813766	-0.0429143	-0.0440545	-0.130681	-0.0771908	0.136845	-0.091476	-0.496799	-0.569169	-0.272229	-0.0396112	0.167247	-0.296955	0.297405	-0.0343632	0.0257941	-0.553149	-0.512297	-0.770606	-0.457504	-0.494851	-0.111175	-0.643109	-0.0431423	-0.560767	-0.417654	0.419522
-4.68641	-0.527774	-1.0269	0.0653153	-0.168209	-0.192667	0.0451194	-0.0928653	0.346007	-0.397401	-0.313436	0.321561	-0.719375	-0.581159	0.272341	-0.0504588	-0.160377	-0.126723	-0.158348	-0.163337	-0.422858	-0.0375757	-0.498719	-0.0796382	-0.0421235	-0.0443992	-0.129889	-0.0775051	0.137588	-0.0905091	-0.497624	-0.568417	-0.272887	-0.03934	0.166932	-0.296741	0.298416	-0.0343462	0.027279	-0.552764	-0.513007	-0.769659	-0.458058	-0.494836	-0.112333	-0.641873	-0.0414956	-0.560286	-0.416933	0.419326
-4.68543	-0.526911	-1.02805	0.065805	-0.168496	-0.192307	0.0434856	-0.0920701	0.346025	-0.396031	-0.31298	0.321638	-0.720178	-0.580576	0.2731	-0.0488592	-0.160818	-0.126075	-0.159048	-0.162091	-0.422652	-0.0374038	-0.499175	-0.0779032	-0.0413462	-0.04474	-0.129096	-0.0778151	0.138336	-0.0895366	-0.498454	-0.567656	-0.273549	-0.0390791	0.166605	-0.296529	0.299427	-0.0343291	0.0287792	-0.552353	-0.513718	-0.768716	-0.458601	-0.494815	-0.113489	-0.640627	-0.039857	-0.559802	-0.416212	0.419121
-4.68444	-0.526034	-1.02919	0.0662982	-0.16877	-0.191939	0.0418498	-0.0912708	0.346053	-0.39466	-0.312514	0.321706	-0.720976	-0.579984	0.273858	-0.0472521	-0.161246	-0.125429	-0.159749	-0.160849	-0.422448	-0.0372177	-0.499636	-0.0761717	-0.0405825	-0.0450768	-0.128304	-0.0781208	0.139086	-0.0885584	-0.499291	-0.566884	-0.274213	-0.0388283	0.166266	-0.296319	0.300436	-0.034312	0.0302946	-0.551915	-0.514428	-0.767777	-0.459132	-0.494787	-0.114642	-0.639371	-0.0382265	-0.559315	-0.415492	0.418908
-4.68346	-0.525143	-1.03033	0.0667949	-0.169031	-0.191564	0.040212	-0.0904678	0.346089	-0.393287	-0.312039	0.321763	-0.721771	-0.579382	0.274616	-0.0456375	-0.161661	-0.124784	-0.160452	-0.159611	-0.422247	-0.0370175	-0.500102	-0.0744439	-0.0398324	-0.0454097	-0.127511	-0.0784223	0.13984	-0.0875746	-0.500133	-0.566102	-0.274879	-0.0385875	0.165916	-0.296111	0.301444	-0.0342949	0.0318251	-0.551452	-0.515137	-0.766841	-0.459652	-0.494752	-0.115792	-0.638106	-0.0366042	-0.558825	-0.414773	0.418686
-4.68248	-0.524239	-1.03147	0.0672949	-0.16928	-0.191181	0.0385725	-0.089661	0.346135	-0.391913	-0.311554	0.321809	-0.722562	-0.57877	0.275374	-0.0440156	-0.162063	-0.124141	-0.161156	-0.158376	-0.422048	-0.0368031	-0.500571	-0.0727197	-0.0390959	-0.0457385	-0.126718	-0.0787194	0.140598	-0.0865855	-0.500981	-0.565311	-0.275549	-0.0383567	0.165553	-0.295905	0.302452	-0.0342778	0.0333706	-0.550964	-0.515845	-0.76591	-0.46016	-0.49471	-0.116939	-0.636831	-0.0349902	-0.558333	-0.414054	0.418456
-4.6815	-0.523321	-1.0326	0.0677981	-0.169517	-0.19079	0.0369314	-0.0888508	0.346189	-0.390538	-0.311059	0.321845	-0.723348	-0.578149	0.276131	-0.0423864	-0.162452	-0.123499	-0.161862	-0.157146	-0.421852	-0.0365746	-0.501046	-0.0709994	-0.0383733	-0.0460633	-0.125925	-0.0790124	0.141359	-0.085591	-0.501835	-0.56451	-0.27622	-0.0381358	0.165179	-0.295701	0.303458	-0.0342608	0.0349309	-0.550449	-0.516552	-0.764982	-0.460657	-0.494661	-0.118083	-0.635547	-0.0333846	-0.557837	-0.413336	0.418217
-4.68051	-0.522389	-1.03373	0.0683046	-0.16974	-0.19039	0.0352886	-0.0880373	0.346253	-0.389163	-0.310555	0.321872	-0.72413	-0.577519	0.276887	-0.04075	-0.162828	-0.122859	-0.162569	-0.15592	-0.421658	-0.036332	-0.501524	-0.0692831	-0.0376644	-0.046384	-0.125132	-0.0793011	0.142123	-0.0845912	-0.502694	-0.5637	-0.276894	-0.0379247	0.164793	-0.295499	0.304464	-0.0342438	0.0365058	-0.549908	-0.517259	-0.764059	-0.461141	-0.494605	-0.119224	-0.634252	-0.0317875	-0.557339	-0.412619	0.417969
-4.67953	-0.521443	-1.03485	0.068814	-0.169952	-0.189983	0.0336444	-0.0872207	0.346327	-0.387786	-0.310042	0.321888	-0.724908	-0.576878	0.277643	-0.0391064	-0.163192	-0.12222	-0.163278	-0.154698	-0.421466	-0.0360753	-0.502006	-0.0675707	-0.0369694	-0.0467006	-0.12434	-0.0795856	0.14289	-0.0835862	-0.50356	-0.56288	-0.27757	-0.0377233	0.164395	-0.2953	0.305468	-0.034227	0.0380953	-0.549342	-0.517964	-0.763139	-0.461614	-0.494542	-0.120363	-0.632949	-0.030199	-0.556838	-0.411903	0.417713
-4.67855	-0.520485	-1.03596	0.0693265	-0.170151	-0.189568	0.0319989	-0.0864011	0.346409	-0.386409	-0.30952	0.321893	-0.725681	-0.576228	0.278399	-0.0374559	-0.163543	-0.121584	-0.163988	-0.153481	-0.421277	-0.0358045	-0.502493	-0.0658626	-0.0362883	-0.0470131	-0.123547	-0.079866	0.14366	-0.0825763	-0.50443	-0.56205	-0.278248	-0.0375314	0.163985	-0.295103	0.306472	-0.0342102	0.0396992	-0.548749	-0.518668	-0.762224	-0.462074	-0.494471	-0.121498	-0.631635	-0.0286191	-0.556334	-0.411188	0.417449
-4.67756	-0.519512	-1.03707	0.0698418	-0.170338	-0.189144	0.0303521	-0.0855787	0.3465	-0.385032	-0.308988	0.321889	-0.72645	-0.575569	0.279153	-0.0357984	-0.163882	-0.120949	-0.1647	-0.152269	-0.42109	-0.0355197	-0.502983	-0.0641587	-0.0356212	-0.0473215	-0.122755	-0.0801422	0.144434	-0.0815613	-0.505307	-0.561211	-0.278928	-0.0373491	0.163564	-0.294908	0.307474	-0.0341935	0.0413174	-0.548131	-0.51937	-0.761313	-0.462522	-0.494393	-0.12263	-0.630313	-0.0270479	-0.555827	-0.410474	0.417176
-4.67658	-0.518527	-1.03818	0.0703599	-0.170513	-0.188713	0.0287043	-0.0847537	0.346601	-0.383655	-0.308446	0.321875	-0.727214	-0.574899	0.279907	-0.034134	-0.164208	-0.120316	-0.165414	-0.151061	-0.420906	-0.0352208	-0.503478	-0.0624591	-0.0349681	-0.0476257	-0.121964	-0.0804143	0.14521	-0.0805415	-0.506189	-0.560363	-0.279609	-0.0371761	0.163131	-0.294716	0.308475	-0.034177	0.0429497	-0.547486	-0.520071	-0.760407	-0.462958	-0.494308	-0.12376	-0.62898	-0.0254856	-0.555318	-0.409761	0.416894
-4.6756	-0.517528	-1.03927	0.0708807	-0.170676	-0.188273	0.0270554	-0.0839262	0.346711	-0.382277	-0.307896	0.321851	-0.727974	-0.57422	0.28066	-0.0324628	-0.164522	-0.119685	-0.166129	-0.149858	-0.420723	-0.034908	-0.503976	-0.060764	-0.034329	-0.0479256	-0.121173	-0.0806823	0.145989	-0.0795169	-0.507076	-0.559505	-0.280292	-0.0370125	0.162687	-0.294527	0.309475	-0.0341607	0.0445959	-0.546816	-0.52077	-0.759504	-0.463381	-0.494215	-0.124886	-0.627638	-0.0239322	-0.554805	-0.40905	0.416604
-4.67461	-0.516516	-1.04037	0.0714041	-0.170827	-0.187824	0.0254057	-0.0830966	0.346829	-0.3809	-0.307336	0.321817	-0.728729	-0.573532	0.281411	-0.030785	-0.164823	-0.119056	-0.166845	-0.14866	-0.420543	-0.0345812	-0.504478	-0.0590735	-0.0337042	-0.0482214	-0.120382	-0.0809462	0.146771	-0.0784876	-0.507969	-0.558639	-0.280976	-0.036858	0.162231	-0.29434	0.310474	-0.0341445	0.046256	-0.546119	-0.521467	-0.758607	-0.463792	-0.494114	-0.126009	-0.626287	-0.0223878	-0.55429	-0.408339	0.416306
-4.67363	-0.515491	-1.04145	0.07193	-0.170966	-0.187368	0.0237552	-0.0822648	0.346957	-0.379523	-0.306767	0.321774	-0.72948	-0.572833	0.282162	-0.0291005	-0.165111	-0.11843	-0.167563	-0.147468	-0.420365	-0.0342404	-0.504984	-0.0573876	-0.0330934	-0.0485128	-0.119592	-0.081206	0.147556	-0.0774537	-0.508868	-0.557763	-0.281662	-0.0367127	0.161763	-0.294155	0.311472	-0.0341285	0.0479298	-0.545397	-0.522163	-0.757714	-0.464191	-0.494006	-0.127128	-0.624926	-0.0208524	-0.553772	-0.40763	0.415999
-4.67265	-0.514454	-1.04253	0.0724584	-0.171093	-0.186903	0.0221041	-0.0814312	0.347094	-0.378147	-0.306189	0.321721	-0.730226	-0.572125	0.282912	-0.0274096	-0.165388	-0.117805	-0.168283	-0.146281	-0.420189	-0.0338857	-0.505494	-0.0557065	-0.0324969	-0.0488	-0.118803	-0.0814618	0.148344	-0.0764154	-0.509772	-0.556878	-0.282349	-0.0365764	0.161284	-0.293974	0.312469	-0.0341127	0.0496171	-0.544648	-0.522856	-0.756825	-0.464576	-0.493891	-0.128245	-0.623556	-0.0193262	-0.553252	-0.406923	0.415683
-4.67166	-0.513403	-1.0436	0.072989	-0.171209	-0.186429	0.0204524	-0.0805959	0.34724	-0.376771	-0.305603	0.321658	-0.730968	-0.571407	0.28366	-0.0257122	-0.165652	-0.117183	-0.169004	-0.145099	-0.420016	-0.0335172	-0.506007	-0.0540303	-0.0319147	-0.0490829	-0.118014	-0.0817137	0.149134	-0.0753727	-0.510681	-0.555984	-0.283037	-0.036449	0.160794	-0.293795	0.313464	-0.0340972	0.0513178	-0.543873	-0.523547	-0.755942	-0.464949	-0.493767	-0.129358	-0.622176	-0.0178091	-0.552728	-0.406216	0.415359
-4.67068	-0.512339	-1.04467	0.0735218	-0.171313	-0.185948	0.0188003	-0.079759	0.347394	-0.375396	-0.305007	0.321585	-0.731704	-0.57068	0.284407	-0.0240085	-0.165904	-0.116563	-0.169727	-0.143924	-0.419844	-0.0331348	-0.506524	-0.0523589	-0.0313467	-0.0493614	-0.117227	-0.0819615	0.149927	-0.0743258	-0.511596	-0.555081	-0.283725	-0.0363304	0.160292	-0.293619	0.314458	-0.0340819	0.0530318	-0.543073	-0.524236	-0.755063	-0.465309	-0.493635	-0.130469	-0.620787	-0.0163014	-0.552202	-0.405512	0.415027
-4.6697	-0.511263	-1.04573	0.0740568	-0.171405	-0.185457	0.0171479	-0.0789208	0.347558	-0.374022	-0.304402	0.321503	-0.732436	-0.569942	0.285153	-0.0222986	-0.166144	-0.115945	-0.170451	-0.142754	-0.419675	-0.0327385	-0.507044	-0.0506927	-0.0307932	-0.0496356	-0.11644	-0.0822055	0.150722	-0.0732746	-0.512517	-0.55417	-0.284415	-0.0362205	0.159779	-0.293446	0.315452	-0.0340668	0.0547588	-0.542246	-0.524922	-0.754189	-0.465656	-0.493496	-0.131575	-0.619388	-0.0148031	-0.551674	-0.404809	0.414687
-4.66872	-0.510174	-1.04678	0.0745939	-0.171485	-0.184958	0.0154954	-0.0780814	0.34773	-0.372649	-0.303789	0.321412	-0.733163	-0.569195	0.285898	-0.0205825	-0.166372	-0.115329	-0.171177	-0.14159	-0.419508	-0.0323285	-0.507568	-0.0490315	-0.0302539	-0.0499054	-0.115654	-0.0824455	0.15152	-0.0722195	-0.513442	-0.55325	-0.285104	-0.0361192	0.159254	-0.293276	0.316443	-0.0340521	0.0564987	-0.541393	-0.525606	-0.75332	-0.46599	-0.493348	-0.132679	-0.61798	-0.0133142	-0.551142	-0.404107	0.414338
-4.66773	-0.509073	-1.04782	0.0751328	-0.171555	-0.184451	0.0138428	-0.077241	0.347912	-0.371278	-0.303166	0.321311	-0.733886	-0.568438	0.286641	-0.0188603	-0.166588	-0.114717	-0.171904	-0.140432	-0.419342	-0.0319047	-0.508095	-0.0473756	-0.0297292	-0.0501708	-0.114869	-0.0826816	0.152319	-0.0711603	-0.514373	-0.552321	-0.285795	-0.0360264	0.158719	-0.293109	0.317434	-0.0340376	0.0582514	-0.540514	-0.526288	-0.752456	-0.466311	-0.493193	-0.133779	-0.616563	-0.0118348	-0.550608	-0.403407	0.413981
-4.66675	-0.507959	-1.04886	0.0756737	-0.171612	-0.183935	0.0121903	-0.0763998	0.348102	-0.369908	-0.302536	0.321201	-0.734603	-0.567672	0.287382	-0.0171322	-0.166792	-0.114106	-0.172633	-0.13928	-0.419179	-0.0314672	-0.508625	-0.045725	-0.0292188	-0.0504318	-0.114086	-0.0829139	0.153121	-0.0700973	-0.515309	-0.551383	-0.286485	-0.035942	0.158172	-0.292945	0.318424	-0.0340235	0.0600166	-0.53961	-0.526966	-0.751596	-0.466618	-0.493029	-0.134876	-0.615136	-0.010365	-0.550072	-0.402709	0.413615
-4.66577	-0.506833	-1.04989	0.0762163	-0.171659	-0.183411	0.010538	-0.075558	0.348301	-0.368539	-0.301896	0.321081	-0.735315	-0.566895	0.288122	-0.0153983	-0.166984	-0.113498	-0.173363	-0.138135	-0.419018	-0.0310161	-0.509158	-0.0440797	-0.028723	-0.0506884	-0.113303	-0.0831424	0.153926	-0.0690305	-0.51625	-0.550437	-0.287176	-0.0358659	0.157614	-0.292784	0.319412	-0.0340098	0.0617943	-0.538679	-0.527642	-0.750742	-0.466912	-0.492857	-0.135969	-0.613701	-0.00890489	-0.549532	-0.402013	0.413242
-4.66478	-0.505695	-1.05091	0.0767605	-0.171695	-0.182877	0.00888595	-0.0747157	0.348509	-0.367173	-0.301248	0.320953	-0.736023	-0.566109	0.28886	-0.0136585	-0.167164	-0.112893	-0.174095	-0.136996	-0.418859	-0.0305513	-0.509694	-0.04244	-0.0282417	-0.0509404	-0.112522	-0.0833671	0.154732	-0.0679601	-0.517196	-0.549483	-0.287866	-0.035798	0.157045	-0.292627	0.320399	-0.0339964	0.0635843	-0.537722	-0.528314	-0.749893	-0.467192	-0.492676	-0.137059	-0.612255	-0.0074545	-0.548991	-0.401319	0.41286
-4.6638	-0.504545	-1.05192	0.0773063	-0.171719	-0.182336	0.00723437	-0.0738732	0.348725	-0.365808	-0.300591	0.320815	-0.736725	-0.565313	0.289596	-0.0119131	-0.167333	-0.112291	-0.174829	-0.135864	-0.418701	-0.0300728	-0.510233	-0.0408058	-0.027775	-0.051188	-0.111742	-0.0835881	0.15554	-0.0668862	-0.518148	-0.54852	-0.288557	-0.0357382	0.156465	-0.292473	0.321384	-0.0339834	0.0653864	-0.536739	-0.528984	-0.74905	-0.467459	-0.492487	-0.138146	-0.610801	-0.00601392	-0.548446	-0.400626	0.41247
-4.66282	-0.503382	-1.05292	0.0778537	-0.171733	-0.181785	0.00558335	-0.0730305	0.348951	-0.364445	-0.299926	0.320669	-0.737422	-0.564507	0.290331	-0.0101621	-0.16749	-0.111691	-0.175564	-0.134739	-0.418546	-0.0295808	-0.510775	-0.0391773	-0.0273228	-0.0514311	-0.110964	-0.0838054	0.15635	-0.0658088	-0.519104	-0.547549	-0.289247	-0.0356864	0.155875	-0.292322	0.322369	-0.0339707	0.0672005	-0.535731	-0.52965	-0.748211	-0.467713	-0.49229	-0.139229	-0.609338	-0.0045832	-0.547899	-0.399936	0.412072
-4.66183	-0.502208	-1.05392	0.0784024	-0.171735	-0.181226	0.003933	-0.072188	0.349184	-0.363085	-0.299253	0.320513	-0.738115	-0.563692	0.291064	-0.00840563	-0.167636	-0.111095	-0.1763	-0.133621	-0.418392	-0.0290753	-0.511319	-0.0375545	-0.0268853	-0.0516696	-0.110186	-0.0840189	0.157162	-0.0647281	-0.520065	-0.54657	-0.289937	-0.0356424	0.155273	-0.292175	0.323352	-0.0339585	0.0690263	-0.534696	-0.530312	-0.747378	-0.467952	-0.492084	-0.140309	-0.607865	-0.00316243	-0.54735	-0.399248	0.411666
-4.66085	-0.501022	-1.05491	0.0789524	-0.171727	-0.180658	0.00228346	-0.0713458	0.349427	-0.361727	-0.298571	0.320349	-0.738802	-0.562866	0.291794	-0.00664376	-0.16777	-0.110501	-0.177038	-0.13251	-0.418241	-0.0285563	-0.511867	-0.0359376	-0.0264624	-0.0519036	-0.109411	-0.0842289	0.157976	-0.0636441	-0.521032	-0.545582	-0.290626	-0.0356063	0.154661	-0.292031	0.324334	-0.0339468	0.0708637	-0.533636	-0.530971	-0.746551	-0.468178	-0.49187	-0.141385	-0.606383	-0.00175166	-0.546797	-0.398562	0.411252
-4.65987	-0.499824	-1.05589	0.0795036	-0.171708	-0.180082	0.000634851	-0.0705041	0.349678	-0.360371	-0.297882	0.320175	-0.739483	-0.562031	0.292523	-0.0048766	-0.167893	-0.10991	-0.177777	-0.131406	-0.418091	-0.0280239	-0.512417	-0.0343265	-0.0260541	-0.0521331	-0.108637	-0.0844352	0.158791	-0.0625571	-0.522003	-0.544587	-0.291314	-0.0355777	0.154037	-0.291891	0.325314	-0.0339355	0.0727125	-0.532549	-0.531626	-0.745728	-0.46839	-0.491647	-0.142457	-0.604893	-0.000350969	-0.546243	-0.397878	0.41083
-4.65889	-0.498614	-1.05685	0.080056	-0.171679	-0.179496	-0.00101271	-0.069663	0.349937	-0.359019	-0.297184	0.319994	-0.74016	-0.561186	0.29325	-0.00310425	-0.168005	-0.109322	-0.178517	-0.130309	-0.417943	-0.027478	-0.512969	-0.0327214	-0.0256606	-0.0523579	-0.107864	-0.084638	0.159608	-0.061467	-0.522979	-0.543584	-0.292002	-0.0355568	0.153404	-0.291754	0.326293	-0.0339246	0.0745726	-0.531437	-0.532278	-0.744912	-0.468588	-0.491415	-0.143526	-0.603393	0.00103959	-0.545686	-0.397196	0.4104
-4.6579	-0.497393	-1.05781	0.0806094	-0.171639	-0.178902	-0.0026591	-0.0688227	0.350205	-0.357669	-0.296478	0.319803	-0.740831	-0.560331	0.293975	-0.00132682	-0.168105	-0.108738	-0.179259	-0.12922	-0.417796	-0.0269188	-0.513524	-0.0311223	-0.0252817	-0.0525782	-0.107093	-0.0848372	0.160427	-0.0603741	-0.52396	-0.542573	-0.292688	-0.0355432	0.152759	-0.291622	0.327271	-0.0339143	0.0764438	-0.5303	-0.532925	-0.7441	-0.468771	-0.491175	-0.144591	-0.601884	0.00241995	-0.545126	-0.396517	0.409962
-4.65692	-0.496161	-1.05876	0.0811637	-0.171588	-0.178299	-0.00430418	-0.0679834	0.350482	-0.356322	-0.295764	0.319604	-0.741497	-0.559467	0.294697	0.000455613	-0.168195	-0.108156	-0.180003	-0.128138	-0.417652	-0.0263463	-0.514081	-0.0295294	-0.0249176	-0.0527938	-0.106324	-0.085033	0.161246	-0.0592783	-0.524945	-0.541555	-0.293374	-0.0355371	0.152104	-0.291493	0.328247	-0.0339045	0.0783259	-0.529136	-0.533569	-0.743295	-0.468941	-0.490925	-0.145653	-0.600366	0.00379005	-0.544564	-0.39584	0.409516
-4.65594	-0.494917	-1.05971	0.0817189	-0.171527	-0.177688	-0.00594784	-0.0671454	0.350766	-0.354978	-0.295042	0.319396	-0.742158	-0.558592	0.295418	0.00224293	-0.168273	-0.107578	-0.180747	-0.127065	-0.417509	-0.0257606	-0.51464	-0.0279426	-0.0245682	-0.0530048	-0.105557	-0.0852252	0.162067	-0.0581799	-0.525935	-0.540528	-0.294058	-0.0355381	0.151439	-0.291368	0.329222	-0.0338952	0.0802187	-0.527947	-0.534208	-0.742495	-0.469096	-0.490667	-0.146711	-0.598839	0.00514983	-0.544	-0.395165	0.409063
-4.65495	-0.493663	-1.06064	0.0822748	-0.171457	-0.177067	-0.00758994	-0.0663087	0.35106	-0.353638	-0.294312	0.31918	-0.742813	-0.557708	0.296136	0.00403504	-0.16834	-0.107003	-0.181493	-0.125999	-0.417367	-0.0251616	-0.515201	-0.0263621	-0.0242336	-0.0532112	-0.104791	-0.0854141	0.162889	-0.0570789	-0.52693	-0.539494	-0.29474	-0.0355463	0.150763	-0.291247	0.330195	-0.0338864	0.0821221	-0.526732	-0.534843	-0.7417	-0.469237	-0.4904	-0.147765	-0.597304	0.00649923	-0.543433	-0.394493	0.408601
-4.65397	-0.492397	-1.06156	0.0828314	-0.171376	-0.176438	-0.00923036	-0.0654737	0.351361	-0.352301	-0.293575	0.318956	-0.743463	-0.556814	0.296851	0.00583184	-0.168397	-0.106432	-0.182241	-0.124941	-0.417228	-0.0245495	-0.515764	-0.024788	-0.0239137	-0.0534129	-0.104027	-0.0855996	0.163713	-0.0559755	-0.527929	-0.538453	-0.295421	-0.0355614	0.150077	-0.29113	0.331167	-0.0338783	0.0840358	-0.525491	-0.535473	-0.740912	-0.469364	-0.490124	-0.148816	-0.595759	0.00783818	-0.542864	-0.393824	0.408132
-4.65299	-0.49112	-1.06247	0.0833886	-0.171285	-0.1758	-0.010869	-0.0646403	0.351671	-0.350968	-0.29283	0.318723	-0.744107	-0.55591	0.297565	0.00763322	-0.168443	-0.105864	-0.182989	-0.123891	-0.41709	-0.0239242	-0.51633	-0.0232202	-0.0236086	-0.0536099	-0.103266	-0.0857818	0.164537	-0.0548697	-0.528933	-0.537405	-0.2961	-0.0355835	0.14938	-0.291017	0.332138	-0.0338707	0.0859597	-0.524225	-0.536099	-0.740129	-0.469476	-0.489838	-0.149862	-0.594206	0.00916664	-0.542292	-0.393157	0.407656
-4.652	-0.489832	-1.06337	0.0839463	-0.171184	-0.175154	-0.0125057	-0.0638089	0.351988	-0.349638	-0.292077	0.318482	-0.744746	-0.554996	0.298276	0.00943908	-0.168478	-0.105299	-0.183739	-0.122849	-0.416953	-0.0232859	-0.516896	-0.0216589	-0.0233183	-0.0538023	-0.102506	-0.0859607	0.165362	-0.0537617	-0.529941	-0.536349	-0.296778	-0.0356124	0.148674	-0.290908	0.333107	-0.0338637	0.0878937	-0.522934	-0.53672	-0.739352	-0.469574	-0.489544	-0.150905	-0.592643	0.0104845	-0.541719	-0.392492	0.407172
-4.65102	-0.488534	-1.06426	0.0845044	-0.171073	-0.174498	-0.0141403	-0.0629797	0.352314	-0.348312	-0.291317	0.318233	-0.745379	-0.554073	0.298984	0.0112493	-0.168503	-0.104739	-0.18449	-0.121816	-0.416818	-0.0226346	-0.517465	-0.0201041	-0.0230427	-0.0539899	-0.101748	-0.0861363	0.166188	-0.0526516	-0.530953	-0.535286	-0.297453	-0.035648	0.147957	-0.290803	0.334074	-0.0338573	0.0898374	-0.521617	-0.537336	-0.738581	-0.469657	-0.48924	-0.151945	-0.591072	0.0117918	-0.541142	-0.391831	0.40668
-4.65004	-0.487225	-1.06514	0.0850628	-0.170953	-0.173834	-0.0157727	-0.0621527	0.352648	-0.346991	-0.29055	0.317977	-0.746007	-0.55314	0.29969	0.0130639	-0.168517	-0.104181	-0.185242	-0.120792	-0.416685	-0.0219704	-0.518035	-0.0185559	-0.022782	-0.0541728	-0.100993	-0.0863087	0.167015	-0.0515395	-0.53197	-0.534216	-0.298126	-0.0356901	0.14723	-0.290703	0.33504	-0.0338516	0.0917908	-0.520274	-0.537948	-0.737816	-0.469725	-0.488928	-0.15298	-0.589493	0.0130885	-0.540564	-0.391172	0.40618
-4.64905	-0.485905	-1.06601	0.0856215	-0.170823	-0.173161	-0.0174029	-0.0613282	0.35299	-0.345673	-0.289775	0.317712	-0.746629	-0.552197	0.300393	0.0148825	-0.168521	-0.103628	-0.185995	-0.119776	-0.416552	-0.0212932	-0.518607	-0.0170144	-0.0225361	-0.054351	-0.100239	-0.086478	0.167842	-0.0504254	-0.532991	-0.533139	-0.298797	-0.0357387	0.146494	-0.290607	0.336005	-0.0338465	0.0937537	-0.518907	-0.538554	-0.737057	-0.469779	-0.488605	-0.154012	-0.587904	0.0143744	-0.539983	-0.390516	0.405674
-4.64807	-0.484575	-1.06687	0.0861803	-0.170683	-0.172479	-0.0190305	-0.0605064	0.35334	-0.34436	-0.288993	0.317439	-0.747246	-0.551244	0.301094	0.0167053	-0.168515	-0.103078	-0.18675	-0.118768	-0.416422	-0.0206032	-0.51918	-0.0154796	-0.022305	-0.0545245	-0.0994877	-0.0866441	0.16867	-0.0493096	-0.534016	-0.532055	-0.299466	-0.0357936	0.145747	-0.290516	0.336968	-0.0338421	0.0957258	-0.517514	-0.539155	-0.736303	-0.469817	-0.488274	-0.15504	-0.586307	0.0156495	-0.5394	-0.389863	0.40516
-4.64709	-0.483235	-1.06772	0.0867392	-0.170535	-0.171788	-0.0206556	-0.0596875	0.353698	-0.343052	-0.288203	0.317159	-0.747856	-0.550281	0.301792	0.018532	-0.168499	-0.102532	-0.187505	-0.11777	-0.416293	-0.0199004	-0.519754	-0.0139515	-0.0220887	-0.0546932	-0.0987387	-0.0868072	0.169498	-0.0481921	-0.535045	-0.530965	-0.300132	-0.0358548	0.144991	-0.290429	0.337929	-0.0338384	0.0977069	-0.516096	-0.53975	-0.735556	-0.469841	-0.487933	-0.156064	-0.584702	0.0169139	-0.538815	-0.389212	0.404638
-4.64611	-0.481885	-1.06856	0.0872981	-0.170376	-0.171089	-0.022278	-0.0588716	0.354063	-0.341748	-0.287407	0.316871	-0.748461	-0.549309	0.302487	0.0203626	-0.168472	-0.10199	-0.188262	-0.11678	-0.416165	-0.0191849	-0.520329	-0.0124303	-0.0218871	-0.0548572	-0.0979919	-0.0869672	0.170327	-0.0470731	-0.536078	-0.529868	-0.300795	-0.0359221	0.144225	-0.290347	0.338889	-0.0338353	0.099697	-0.514653	-0.54034	-0.734815	-0.46985	-0.487583	-0.157084	-0.583088	0.0181673	-0.538228	-0.388565	0.40411
-4.64512	-0.480525	-1.06938	0.0878568	-0.170209	-0.170381	-0.0238976	-0.0580589	0.354436	-0.340448	-0.286604	0.316575	-0.74906	-0.548327	0.303179	0.0221969	-0.168436	-0.101453	-0.189019	-0.1158	-0.416038	-0.0184567	-0.520905	-0.0109159	-0.0217004	-0.0550164	-0.0972474	-0.0871242	0.171156	-0.0459526	-0.537115	-0.528764	-0.301455	-0.0359954	0.143449	-0.290269	0.339847	-0.033833	0.101696	-0.513184	-0.540924	-0.73408	-0.469844	-0.487223	-0.1581	-0.581465	0.0194099	-0.537639	-0.387921	0.403574
-4.64414	-0.479155	-1.07019	0.0884154	-0.170033	-0.169664	-0.0255142	-0.0572497	0.354817	-0.339154	-0.285794	0.316272	-0.749654	-0.547335	0.303869	0.0240349	-0.16839	-0.100919	-0.189778	-0.114829	-0.415913	-0.0177159	-0.521482	-0.00940847	-0.0215285	-0.0551708	-0.0965052	-0.0872783	0.171985	-0.0448307	-0.538155	-0.527654	-0.302113	-0.0360747	0.142664	-0.290196	0.340804	-0.0338315	0.103703	-0.511691	-0.541503	-0.733351	-0.469823	-0.486853	-0.159112	-0.579834	0.0206414	-0.537047	-0.38728	0.403031
-4.64316	-0.477775	-1.07099	0.0889737	-0.169848	-0.168939	-0.0271278	-0.056444	0.355206	-0.337864	-0.284977	0.315961	-0.750241	-0.546334	0.304556	0.0258764	-0.168334	-0.100389	-0.190537	-0.113867	-0.415789	-0.0169626	-0.52206	-0.00790801	-0.0213713	-0.0553204	-0.0957655	-0.0874295	0.172814	-0.0437077	-0.5392	-0.526537	-0.302767	-0.0361597	0.141869	-0.290128	0.341759	-0.0338307	0.105719	-0.510173	-0.542075	-0.732628	-0.469786	-0.486474	-0.16012	-0.578194	0.021862	-0.536453	-0.386642	0.402481
-4.64217	-0.476385	-1.07178	0.0895316	-0.169654	-0.168205	-0.0287381	-0.0556421	0.355602	-0.33658	-0.284153	0.315643	-0.750823	-0.545323	0.30524	0.0277214	-0.168268	-0.0998636	-0.191297	-0.112914	-0.415666	-0.0161967	-0.522639	-0.00641458	-0.021229	-0.0554652	-0.0950282	-0.0875779	0.173643	-0.0425836	-0.540248	-0.525414	-0.303418	-0.0362504	0.141065	-0.290065	0.342712	-0.0338307	0.107742	-0.50863	-0.542642	-0.731911	-0.469735	-0.486086	-0.161124	-0.576546	0.0230715	-0.535858	-0.386007	0.401924
-4.64119	-0.474986	-1.07256	0.0900891	-0.169451	-0.167462	-0.0303451	-0.0548442	0.356006	-0.335301	-0.283323	0.315318	-0.751399	-0.544302	0.305921	0.0295696	-0.168193	-0.0993424	-0.192059	-0.111971	-0.415544	-0.0154185	-0.523218	-0.00492823	-0.0211014	-0.0556053	-0.0942934	-0.0877234	0.174472	-0.0414584	-0.5413	-0.524286	-0.304065	-0.0363467	0.140251	-0.290006	0.343664	-0.0338314	0.109774	-0.507063	-0.543202	-0.731201	-0.469668	-0.485687	-0.162125	-0.57489	0.0242699	-0.53526	-0.385375	0.40136
-4.64021	-0.473578	-1.07333	0.0906461	-0.16924	-0.166711	-0.0319485	-0.0540504	0.356417	-0.334027	-0.282486	0.314985	-0.751969	-0.543271	0.306599	0.0314211	-0.168109	-0.0988256	-0.19282	-0.111038	-0.415424	-0.0146279	-0.523797	-0.00344899	-0.0209885	-0.0557405	-0.0935611	-0.0878662	0.1753	-0.0403324	-0.542355	-0.523151	-0.304709	-0.0364485	0.139429	-0.289953	0.344614	-0.033833	0.111813	-0.505471	-0.543756	-0.730496	-0.469585	-0.485279	-0.163121	-0.573226	0.0254572	-0.53466	-0.384747	0.400789
-4.63922	-0.47216	-1.07408	0.0912025	-0.16902	-0.165951	-0.0335484	-0.0532609	0.356835	-0.332759	-0.281643	0.314646	-0.752533	-0.542231	0.307273	0.0332757	-0.168016	-0.0983131	-0.193583	-0.110115	-0.415304	-0.013825	-0.524377	-0.00197692	-0.0208904	-0.0558709	-0.0928314	-0.0880062	0.176128	-0.0392056	-0.543414	-0.52201	-0.305349	-0.0365556	0.138597	-0.289905	0.345563	-0.0338354	0.11386	-0.503854	-0.544304	-0.729799	-0.469488	-0.484862	-0.164113	-0.571553	0.0266333	-0.534058	-0.384122	0.400212
-4.63824	-0.470733	-1.07482	0.0917582	-0.168792	-0.165182	-0.0351446	-0.0524759	0.357261	-0.331497	-0.280794	0.314299	-0.75309	-0.541181	0.307945	0.0351332	-0.167913	-0.0978051	-0.194347	-0.109201	-0.415186	-0.0130099	-0.524957	-0.000512053	-0.020807	-0.0559965	-0.0921043	-0.0881436	0.176956	-0.0380782	-0.544476	-0.520863	-0.305986	-0.036668	0.137756	-0.289862	0.346509	-0.0338386	0.115914	-0.502213	-0.544845	-0.729107	-0.469375	-0.484434	-0.165101	-0.569872	0.0277981	-0.533455	-0.3835	0.399627
-4.63726	-0.469297	-1.07555	0.0923131	-0.168556	-0.164405	-0.0367369	-0.0516956	0.357694	-0.33024	-0.279938	0.313946	-0.753642	-0.540122	0.308614	0.0369937	-0.167801	-0.0973017	-0.195111	-0.108297	-0.415069	-0.0121826	-0.525537	0.000945571	-0.0207382	-0.0561173	-0.0913798	-0.0882784	0.177783	-0.0369503	-0.545542	-0.519711	-0.306618	-0.0367854	0.136907	-0.289824	0.347454	-0.0338427	0.117975	-0.500548	-0.54538	-0.728422	-0.469246	-0.483997	-0.166086	-0.568183	0.0289517	-0.532849	-0.382882	0.399037
-4.63628	-0.467853	-1.07626	0.0928672	-0.168311	-0.16362	-0.0383252	-0.0509202	0.358134	-0.32899	-0.279076	0.313585	-0.754188	-0.539052	0.309279	0.0388569	-0.167681	-0.0968029	-0.195875	-0.107403	-0.414953	-0.0113433	-0.526117	0.00239591	-0.0206842	-0.0562332	-0.090658	-0.0884106	0.17861	-0.0358219	-0.54661	-0.518553	-0.307246	-0.0369079	0.136048	-0.289791	0.348397	-0.0338476	0.120043	-0.498858	-0.545907	-0.727743	-0.469102	-0.483549	-0.167066	-0.566486	0.030094	-0.532241	-0.382267	0.398439
-4.63529	-0.466399	-1.07697	0.0934203	-0.168059	-0.162825	-0.0399093	-0.0501498	0.358581	-0.327745	-0.278209	0.313218	-0.754728	-0.537974	0.309942	0.0407228	-0.167551	-0.0963087	-0.196641	-0.10652	-0.414838	-0.0104919	-0.526697	0.00383893	-0.0206448	-0.0563443	-0.0899388	-0.0885402	0.179435	-0.0346933	-0.547682	-0.51739	-0.307871	-0.0370353	0.135181	-0.289764	0.349339	-0.0338534	0.122118	-0.497144	-0.546428	-0.72707	-0.468942	-0.483092	-0.168042	-0.564781	0.0312249	-0.531632	-0.381656	0.397835
-4.63431	-0.464938	-1.07765	0.0939725	-0.167799	-0.162023	-0.0414893	-0.0493846	0.359034	-0.326507	-0.277335	0.312845	-0.755261	-0.536885	0.310601	0.0425913	-0.167413	-0.0958193	-0.197406	-0.105646	-0.414723	-0.00962863	-0.527277	0.0052746	-0.0206201	-0.0564506	-0.0892224	-0.0886674	0.18026	-0.0335644	-0.548757	-0.516221	-0.30849	-0.0371675	0.134305	-0.289742	0.350279	-0.0338601	0.124199	-0.495407	-0.546942	-0.726404	-0.468767	-0.482625	-0.169013	-0.563068	0.0323445	-0.531021	-0.381049	0.397225
-4.63333	-0.463467	-1.07833	0.0945235	-0.167531	-0.161212	-0.0430648	-0.0486249	0.359495	-0.325275	-0.276455	0.312464	-0.755788	-0.535787	0.311257	0.0444622	-0.167267	-0.0953347	-0.198173	-0.104783	-0.41461	-0.00875346	-0.527856	0.00670289	-0.0206099	-0.056552	-0.0885088	-0.0887922	0.181084	-0.0324355	-0.549835	-0.515047	-0.309105	-0.0373044	0.13342	-0.289726	0.351216	-0.0338677	0.126287	-0.493645	-0.547448	-0.725744	-0.468575	-0.482147	-0.169981	-0.561347	0.0334526	-0.530408	-0.380445	0.396608
-4.63234	-0.461988	-1.07899	0.0950734	-0.167255	-0.160393	-0.0446358	-0.0478707	0.359963	-0.324049	-0.27557	0.312078	-0.75631	-0.53468	0.311909	0.0463354	-0.167111	-0.094855	-0.198939	-0.103931	-0.414497	-0.00786648	-0.528434	0.00812376	-0.0206144	-0.0566486	-0.0877979	-0.0889146	0.181907	-0.0313067	-0.550915	-0.513868	-0.309716	-0.0374458	0.132527	-0.289715	0.352153	-0.0338763	0.128381	-0.491859	-0.547947	-0.72509	-0.468369	-0.48166	-0.170945	-0.559618	0.0345494	-0.529793	-0.379844	0.395985
-4.63136	-0.460501	-1.07964	0.0956221	-0.166971	-0.159565	-0.0462022	-0.0471223	0.360437	-0.32283	-0.274679	0.311684	-0.756825	-0.533563	0.312558	0.0482109	-0.166948	-0.0943803	-0.199706	-0.103089	-0.414386	-0.00696778	-0.529012	0.00953718	-0.0206333	-0.0567404	-0.0870899	-0.0890347	0.182728	-0.030178	-0.551999	-0.512684	-0.310322	-0.0375918	0.131626	-0.28971	0.353087	-0.0338857	0.13048	-0.49005	-0.548439	-0.724443	-0.468146	-0.481163	-0.171904	-0.557881	0.0356346	-0.529176	-0.379248	0.395356
-4.63038	-0.459007	-1.08027	0.0961695	-0.166681	-0.158729	-0.0477638	-0.0463799	0.360918	-0.321617	-0.273783	0.311285	-0.757333	-0.532436	0.313204	0.0500884	-0.166777	-0.0939105	-0.200474	-0.102258	-0.414275	-0.00605743	-0.529589	0.0109431	-0.0206668	-0.0568273	-0.0863847	-0.0891525	0.183548	-0.0290495	-0.553085	-0.511495	-0.310923	-0.037742	0.130716	-0.289711	0.354019	-0.0338962	0.132586	-0.488218	-0.548923	-0.723802	-0.467907	-0.480655	-0.172859	-0.556137	0.0367083	-0.528558	-0.378655	0.394721
-4.62939	-0.457504	-1.0809	0.0967154	-0.166383	-0.157885	-0.0493205	-0.0456435	0.361406	-0.320411	-0.272881	0.310879	-0.757835	-0.531301	0.313847	0.051968	-0.166597	-0.0934459	-0.201241	-0.101437	-0.414165	-0.00513551	-0.530165	0.0123416	-0.0207148	-0.0569094	-0.0856824	-0.089268	0.184367	-0.0279215	-0.554173	-0.510301	-0.311518	-0.0378965	0.129798	-0.289718	0.35495	-0.0339076	0.134697	-0.486361	-0.5494	-0.723168	-0.467653	-0.480138	-0.17381	-0.554385	0.0377705	-0.527938	-0.378066	0.39408
-4.62841	-0.455993	-1.0815	0.09726	-0.166078	-0.157033	-0.0508721	-0.0449135	0.361899	-0.319212	-0.271974	0.310467	-0.758332	-0.530155	0.314486	0.0538494	-0.16641	-0.0929864	-0.202009	-0.100627	-0.414056	-0.0042021	-0.53074	0.0137325	-0.0207772	-0.0569867	-0.0849829	-0.0893814	0.185184	-0.0267939	-0.555265	-0.509103	-0.312109	-0.0380552	0.128872	-0.28973	0.355879	-0.0339199	0.136813	-0.484482	-0.549868	-0.72254	-0.467383	-0.47961	-0.174757	-0.552625	0.0388211	-0.527316	-0.37748	0.393433
-4.62743	-0.454475	-1.08209	0.0978029	-0.165765	-0.156172	-0.0524186	-0.0441899	0.3624	-0.318021	-0.271061	0.310049	-0.758821	-0.529	0.315121	0.0557327	-0.166214	-0.0925321	-0.202777	-0.0998281	-0.413947	-0.00325727	-0.531314	0.0151159	-0.020854	-0.0570591	-0.0842864	-0.0894927	0.185999	-0.025667	-0.556358	-0.5079	-0.312694	-0.0382178	0.127938	-0.289748	0.356805	-0.0339333	0.138934	-0.482579	-0.550329	-0.721919	-0.467096	-0.479072	-0.1757	-0.550858	0.0398601	-0.526693	-0.376899	0.39278
-4.62644	-0.452949	-1.08267	0.0983443	-0.165446	-0.155304	-0.0539598	-0.043473	0.362906	-0.316836	-0.270144	0.309626	-0.759304	-0.527836	0.315754	0.0576175	-0.166011	-0.092083	-0.203545	-0.0990402	-0.413839	-0.0023011	-0.531886	0.0164917	-0.0209452	-0.0571266	-0.0835928	-0.0896019	0.186813	-0.0245408	-0.557454	-0.506692	-0.313274	-0.0383844	0.126996	-0.289772	0.35773	-0.0339477	0.14106	-0.480653	-0.550782	-0.721304	-0.466794	-0.478524	-0.176638	-0.549083	0.0408875	-0.526068	-0.376321	0.392121
-4.62546	-0.451416	-1.08324	0.098884	-0.16512	-0.154427	-0.0554956	-0.0427629	0.363419	-0.315658	-0.269221	0.309196	-0.759781	-0.526663	0.316382	0.059504	-0.165801	-0.0916394	-0.204313	-0.0982633	-0.413732	-0.00133368	-0.532457	0.01786	-0.0210507	-0.0571893	-0.0829022	-0.0897091	0.187625	-0.0234155	-0.558552	-0.50548	-0.313849	-0.0385548	0.126046	-0.289803	0.358653	-0.033963	0.14319	-0.478705	-0.551226	-0.720696	-0.466476	-0.477966	-0.177572	-0.547301	0.0419033	-0.525441	-0.375748	0.391457
-4.62448	-0.449876	-1.08378	0.0994219	-0.164787	-0.153542	-0.0570258	-0.0420598	0.363938	-0.314488	-0.268294	0.308761	-0.760252	-0.52548	0.317007	0.0613918	-0.165583	-0.0912011	-0.205082	-0.0974975	-0.413625	-0.000355087	-0.533026	0.0192206	-0.0211705	-0.0572472	-0.0822146	-0.0898142	0.188435	-0.0222911	-0.559652	-0.504264	-0.314417	-0.0387289	0.125088	-0.289839	0.359574	-0.0339794	0.145326	-0.476733	-0.551663	-0.720094	-0.466141	-0.477398	-0.178502	-0.545511	0.0429073	-0.524813	-0.375178	0.390787
-4.6235	-0.448328	-1.08432	0.099958	-0.164448	-0.15265	-0.0585504	-0.0413639	0.364462	-0.313325	-0.267362	0.308319	-0.760716	-0.524288	0.317629	0.063281	-0.165358	-0.0907683	-0.20585	-0.0967429	-0.413519	0.000634598	-0.533594	0.0205736	-0.0213046	-0.0573003	-0.0815299	-0.0899175	0.189243	-0.0211678	-0.560754	-0.503044	-0.31498	-0.0389065	0.124123	-0.289882	0.360493	-0.0339969	0.147465	-0.474739	-0.55209	-0.719499	-0.465791	-0.476819	-0.179427	-0.543714	0.0438997	-0.524184	-0.374613	0.390112
-4.62251	-0.446774	-1.08484	0.100492	-0.164102	-0.15175	-0.0600691	-0.0406754	0.364993	-0.31217	-0.266425	0.307873	-0.761173	-0.523086	0.318247	0.0651714	-0.165126	-0.0903411	-0.206617	-0.0959997	-0.413414	0.00163529	-0.534159	0.021919	-0.0214528	-0.0573486	-0.0808483	-0.0900189	0.190048	-0.0200457	-0.561859	-0.50182	-0.315537	-0.0390876	0.12315	-0.28993	0.36141	-0.0340153	0.149608	-0.472722	-0.55251	-0.71891	-0.465424	-0.47623	-0.180348	-0.541909	0.0448804	-0.523553	-0.374052	0.389431
-4.62153	-0.445213	-1.08534	0.101024	-0.16375	-0.150842	-0.0615819	-0.0399943	0.36553	-0.311023	-0.265483	0.30742	-0.761624	-0.521876	0.318862	0.0670628	-0.164887	-0.0899194	-0.207385	-0.0952678	-0.413309	0.0026469	-0.534723	0.0232568	-0.0216152	-0.057392	-0.0801697	-0.0901185	0.190852	-0.0189249	-0.562965	-0.500592	-0.316088	-0.0392721	0.12217	-0.289986	0.362325	-0.0340349	0.151755	-0.470683	-0.55292	-0.718327	-0.465042	-0.47563	-0.181265	-0.540098	0.0458493	-0.522921	-0.373494	0.388745
-4.62055	-0.443646	-1.08583	0.101555	-0.163392	-0.149926	-0.0630887	-0.039321	0.366072	-0.309883	-0.264537	0.306963	-0.762069	-0.520656	0.319472	0.0689553	-0.164641	-0.0895035	-0.208153	-0.0945474	-0.413204	0.00366935	-0.535284	0.024587	-0.0217916	-0.0574306	-0.0794941	-0.0902163	0.191653	-0.0178055	-0.564072	-0.49936	-0.316632	-0.0394599	0.121183	-0.290047	0.363238	-0.0340555	0.153906	-0.468621	-0.553322	-0.717751	-0.464643	-0.475021	-0.182178	-0.538279	0.0468064	-0.522287	-0.372941	0.388054
-4.61956	-0.442071	-1.0863	0.102083	-0.163028	-0.149002	-0.0645892	-0.0386555	0.366619	-0.308751	-0.263587	0.3065	-0.762507	-0.519427	0.32008	0.0708486	-0.164388	-0.0890933	-0.20892	-0.0938385	-0.4131	0.00470255	-0.535843	0.0259094	-0.0219821	-0.0574644	-0.0788216	-0.0903124	0.192451	-0.0166877	-0.565182	-0.498125	-0.317171	-0.0396508	0.120188	-0.290115	0.364149	-0.0340772	0.15606	-0.466538	-0.553715	-0.717182	-0.464228	-0.474401	-0.183086	-0.536453	0.0477518	-0.521652	-0.372392	0.387357
-4.61858	-0.440491	-1.08676	0.102609	-0.162657	-0.148071	-0.0660835	-0.0379981	0.367173	-0.307627	-0.262632	0.306031	-0.762938	-0.518189	0.320683	0.0727426	-0.164129	-0.0886889	-0.209686	-0.0931412	-0.412996	0.00574641	-0.5364	0.0272243	-0.0221866	-0.0574934	-0.0781522	-0.0904068	0.193247	-0.0155715	-0.566292	-0.496886	-0.317702	-0.0398448	0.119186	-0.29019	0.365058	-0.0341	0.158218	-0.464432	-0.554099	-0.716619	-0.463796	-0.47377	-0.18399	-0.53462	0.0486854	-0.521016	-0.371848	0.386656
-4.6176	-0.438904	-1.0872	0.103132	-0.162281	-0.147133	-0.0675713	-0.0373489	0.367731	-0.306511	-0.261673	0.305558	-0.763363	-0.516941	0.321283	0.0746373	-0.163863	-0.0882903	-0.210453	-0.0924555	-0.412893	0.00680085	-0.536954	0.0285314	-0.0224051	-0.0575175	-0.0774858	-0.0904996	0.19404	-0.014457	-0.567405	-0.495644	-0.318228	-0.0400417	0.118178	-0.290271	0.365965	-0.0341239	0.160378	-0.462305	-0.554474	-0.716062	-0.463349	-0.473129	-0.184889	-0.53278	0.0496071	-0.520378	-0.371307	0.38595
-4.61661	-0.437312	-1.08763	0.103654	-0.161899	-0.146187	-0.0690525	-0.036708	0.368295	-0.305403	-0.260711	0.30508	-0.763781	-0.515685	0.321879	0.0765325	-0.163591	-0.0878977	-0.211218	-0.0917816	-0.41279	0.00786576	-0.537505	0.0298309	-0.0226374	-0.0575369	-0.0768225	-0.0905909	0.19483	-0.0133444	-0.568518	-0.494399	-0.318746	-0.0402415	0.117162	-0.290359	0.36687	-0.0341489	0.162541	-0.460156	-0.554839	-0.715512	-0.462885	-0.472478	-0.185784	-0.530933	0.0505171	-0.519739	-0.370771	0.385239
-4.61563	-0.435713	-1.08804	0.104173	-0.161512	-0.145233	-0.070527	-0.0360757	0.368864	-0.304304	-0.259744	0.304596	-0.764192	-0.51442	0.322472	0.0784282	-0.163313	-0.0875111	-0.211983	-0.0911195	-0.412688	0.00894107	-0.538054	0.0311228	-0.0228835	-0.0575515	-0.0761623	-0.0906806	0.195617	-0.0122338	-0.569633	-0.49315	-0.319258	-0.0404439	0.11614	-0.290453	0.367772	-0.034175	0.164706	-0.457985	-0.555195	-0.714969	-0.462404	-0.471817	-0.186675	-0.529079	0.0514152	-0.519099	-0.370239	0.384523
-4.61465	-0.434109	-1.08844	0.104689	-0.161119	-0.144272	-0.0719947	-0.0354522	0.369438	-0.303213	-0.258773	0.304108	-0.764597	-0.513146	0.323061	0.0803241	-0.163029	-0.0871305	-0.212748	-0.0904692	-0.412585	0.0100267	-0.5386	0.0324069	-0.0231434	-0.0575614	-0.0755053	-0.0907689	0.196401	-0.0111253	-0.570749	-0.491899	-0.319762	-0.040649	0.115111	-0.290555	0.368673	-0.0342022	0.166874	-0.455794	-0.555542	-0.714431	-0.461908	-0.471145	-0.187561	-0.527219	0.0523014	-0.518457	-0.369712	0.383803
-4.61367	-0.432499	-1.08882	0.105204	-0.160721	-0.143304	-0.0734554	-0.0348375	0.370018	-0.30213	-0.257799	0.303615	-0.764995	-0.511862	0.323646	0.0822201	-0.162739	-0.0867561	-0.213512	-0.0898308	-0.412483	0.0111225	-0.539142	0.0336835	-0.023417	-0.0575665	-0.0748513	-0.0908557	0.197182	-0.0100191	-0.571866	-0.490644	-0.32026	-0.0408567	0.114075	-0.290663	0.369571	-0.0342306	0.169044	-0.453581	-0.555879	-0.7139	-0.461395	-0.470462	-0.188443	-0.525352	0.0531758	-0.517815	-0.369189	0.383078
-4.61268	-0.430884	-1.08918	0.105715	-0.160318	-0.142329	-0.074909	-0.0342318	0.370602	-0.301056	-0.256821	0.303117	-0.765386	-0.51057	0.324227	0.0841163	-0.162443	-0.0863878	-0.214275	-0.0892044	-0.412381	0.0122284	-0.539681	0.0349524	-0.0237042	-0.0575668	-0.0742005	-0.0909412	0.197959	-0.00891508	-0.572984	-0.489387	-0.320751	-0.0410667	0.113033	-0.290778	0.370467	-0.0342601	0.171216	-0.451346	-0.556206	-0.713376	-0.460866	-0.46977	-0.189321	-0.523478	0.0540383	-0.517171	-0.36867	0.382348
-4.6117	-0.429264	-1.08953	0.106224	-0.159909	-0.141347	-0.0763555	-0.0336354	0.37119	-0.299991	-0.25584	0.302615	-0.765771	-0.509269	0.324805	0.0860123	-0.162142	-0.0860258	-0.215037	-0.0885901	-0.41228	0.0133444	-0.540217	0.0362136	-0.024005	-0.0575623	-0.0735528	-0.0910254	0.198734	-0.00781354	-0.574102	-0.488127	-0.321234	-0.0412791	0.111984	-0.2909	0.371361	-0.0342908	0.173389	-0.449092	-0.556524	-0.712858	-0.46032	-0.469067	-0.190194	-0.521597	0.0548889	-0.516527	-0.368156	0.381615
-4.61072	-0.427638	-1.08986	0.10673	-0.159496	-0.140358	-0.0777946	-0.0330483	0.371784	-0.298934	-0.254855	0.302108	-0.766149	-0.50796	0.325379	0.0879082	-0.161835	-0.0856701	-0.215798	-0.0879878	-0.412178	0.0144702	-0.540749	0.0374672	-0.0243193	-0.0575532	-0.0729082	-0.0911084	0.199504	-0.00671454	-0.575222	-0.486865	-0.32171	-0.0414936	0.110929	-0.291029	0.372253	-0.0343226	0.175564	-0.446816	-0.556831	-0.712346	-0.459758	-0.468353	-0.191063	-0.51971	0.0557276	-0.515881	-0.367646	0.380877
-4.60973	-0.426008	-1.09017	0.107234	-0.159077	-0.139362	-0.0792263	-0.0324708	0.372381	-0.297886	-0.253867	0.301596	-0.76652	-0.506641	0.325949	0.0898038	-0.161523	-0.0853208	-0.216558	-0.0873977	-0.412077	0.0156059	-0.541277	0.0387132	-0.024647	-0.0575393	-0.0722667	-0.0911901	0.200271	-0.00561819	-0.576342	-0.4856	-0.322178	-0.0417103	0.109868	-0.291165	0.373143	-0.0343556	0.17774	-0.44452	-0.557129	-0.711841	-0.45918	-0.467629	-0.191927	-0.517817	0.0565545	-0.515234	-0.367141	0.380135
-4.60875	-0.424372	-1.09047	0.107734	-0.158654	-0.138359	-0.0806504	-0.0319029	0.372984	-0.296847	-0.252876	0.301081	-0.766884	-0.505314	0.326515	0.0916991	-0.161206	-0.0849778	-0.217317	-0.0868197	-0.411976	0.0167513	-0.541802	0.0399516	-0.024988	-0.0575206	-0.0716283	-0.0912707	0.201034	-0.0045246	-0.577462	-0.484333	-0.322638	-0.041929	0.108801	-0.291309	0.37403	-0.0343898	0.179917	-0.442203	-0.557417	-0.711342	-0.458585	-0.466895	-0.192786	-0.515917	0.0573694	-0.514587	-0.36664	0.379389
-4.60777	-0.422732	-1.09074	0.108232	-0.158227	-0.13735	-0.0820668	-0.031345	0.37359	-0.295817	-0.251881	0.300561	-0.767241	-0.503978	0.327078	0.0935937	-0.160884	-0.0846414	-0.218075	-0.0862541	-0.411875	0.0179064	-0.542322	0.0411823	-0.0253424	-0.0574973	-0.0709931	-0.0913502	0.201793	-0.00343388	-0.578583	-0.483064	-0.323091	-0.0421496	0.107728	-0.291459	0.374915	-0.0344252	0.182095	-0.439867	-0.557694	-0.710849	-0.457974	-0.46615	-0.193642	-0.514011	0.0581723	-0.513938	-0.366144	0.37864
-4.60678	-0.421088	-1.09101	0.108727	-0.157795	-0.136334	-0.0834754	-0.030797	0.374201	-0.294796	-0.250884	0.300036	-0.767592	-0.502634	0.327637	0.0954878	-0.160558	-0.0843116	-0.218832	-0.0857007	-0.411773	0.019071	-0.542839	0.0424056	-0.0257099	-0.0574693	-0.070361	-0.0914287	0.202549	-0.00234614	-0.579704	-0.481793	-0.323536	-0.042372	0.10665	-0.291617	0.375798	-0.0344617	0.184274	-0.43751	-0.557961	-0.710363	-0.457346	-0.465395	-0.194492	-0.512099	0.0589634	-0.513288	-0.365653	0.377886
-4.6058	-0.419439	-1.09125	0.109219	-0.157358	-0.135311	-0.084876	-0.0302593	0.374816	-0.293785	-0.249884	0.299508	-0.767936	-0.501281	0.328192	0.0973811	-0.160226	-0.0839883	-0.219587	-0.0851596	-0.411672	0.020245	-0.543351	0.0436212	-0.0260906	-0.0574366	-0.069732	-0.0915061	0.2033	-0.00126148	-0.580825	-0.48052	-0.323973	-0.0425961	0.105565	-0.291782	0.376678	-0.0344994	0.186453	-0.435134	-0.558217	-0.709883	-0.456702	-0.464629	-0.195339	-0.51018	0.0597426	-0.512638	-0.365166	0.377129
-4.60482	-0.417786	-1.09148	0.109708	-0.156917	-0.134282	-0.0862686	-0.0297319	0.375434	-0.292782	-0.248881	0.298976	-0.768272	-0.499919	0.328743	0.0992735	-0.15989	-0.0836717	-0.220341	-0.0846309	-0.411571	0.0214283	-0.543858	0.0448293	-0.0264844	-0.0573993	-0.0691061	-0.0915826	0.204047	-0.000180024	-0.581946	-0.479246	-0.324402	-0.0428218	0.104475	-0.291955	0.377556	-0.0345383	0.188632	-0.432738	-0.558463	-0.709409	-0.456042	-0.463853	-0.19618	-0.508255	0.0605098	-0.511987	-0.364683	0.376368
-4.60383	-0.416129	-1.09169	0.110194	-0.156473	-0.133246	-0.087653	-0.029215	0.376057	-0.291789	-0.247876	0.29844	-0.768602	-0.498549	0.32929	0.101165	-0.15955	-0.0833618	-0.221094	-0.0841147	-0.41147	0.0226209	-0.544361	0.0460299	-0.0268911	-0.0573573	-0.0684833	-0.0916582	0.204789	0.000898132	-0.583067	-0.477969	-0.324823	-0.043049	0.103379	-0.292135	0.378432	-0.0345784	0.190811	-0.430323	-0.558698	-0.708941	-0.455365	-0.463067	-0.197018	-0.506325	0.0612651	-0.511335	-0.364206	0.375604
-4.60285	-0.414468	-1.09189	0.110676	-0.156024	-0.132205	-0.089029	-0.0287087	0.376683	-0.290805	-0.246868	0.2979	-0.768925	-0.497171	0.329834	0.103055	-0.159206	-0.0830588	-0.221845	-0.0836109	-0.411369	0.0238226	-0.54486	0.047223	-0.0273107	-0.0573106	-0.0678636	-0.091733	0.205527	0.00197288	-0.584188	-0.476691	-0.325235	-0.0432776	0.102278	-0.292323	0.379305	-0.0346197	0.19299	-0.427888	-0.558923	-0.708479	-0.454672	-0.46227	-0.197851	-0.504388	0.0620085	-0.510682	-0.363733	0.374836
-4.60187	-0.412804	-1.09206	0.111156	-0.155571	-0.131157	-0.0903967	-0.0282133	0.377313	-0.289831	-0.245858	0.297356	-0.769241	-0.495785	0.330374	0.104944	-0.158857	-0.0827625	-0.222595	-0.0831196	-0.411267	0.0250333	-0.545353	0.0484087	-0.0277432	-0.0572594	-0.067247	-0.0918069	0.206261	0.00304411	-0.585308	-0.475412	-0.325639	-0.0435076	0.101172	-0.292518	0.380176	-0.0346623	0.195168	-0.425434	-0.559136	-0.708024	-0.453962	-0.461463	-0.198679	-0.502446	0.0627399	-0.510029	-0.363265	0.374066
-4.60089	-0.411136	-1.09222	0.111632	-0.155115	-0.130103	-0.0917558	-0.0277288	0.377946	-0.288866	-0.244845	0.296809	-0.76955	-0.49439	0.33091	0.106832	-0.158505	-0.0824732	-0.223343	-0.0826408	-0.411166	0.026253	-0.545841	0.0495869	-0.0281883	-0.0572035	-0.0666335	-0.0918802	0.20699	0.00411171	-0.586428	-0.474132	-0.326034	-0.0437387	0.100061	-0.292721	0.381045	-0.034706	0.197346	-0.422962	-0.559339	-0.707575	-0.453236	-0.460645	-0.199502	-0.500497	0.0634595	-0.509375	-0.362802	0.373292
-4.5999	-0.409464	-1.09237	0.112105	-0.154655	-0.129043	-0.0931063	-0.0272554	0.378583	-0.287911	-0.243831	0.296258	-0.769853	-0.492986	0.331442	0.108719	-0.158149	-0.0821908	-0.224089	-0.0821746	-0.411064	0.0274814	-0.546324	0.0507576	-0.0286461	-0.057143	-0.066023	-0.0919527	0.207714	0.00517559	-0.587548	-0.47285	-0.326421	-0.043971	0.0989442	-0.292931	0.381911	-0.0347509	0.199522	-0.42047	-0.55953	-0.707131	-0.452494	-0.459817	-0.200322	-0.498543	0.0641671	-0.50872	-0.362343	0.372515
-4.59892	-0.40779	-1.09249	0.112575	-0.154192	-0.127977	-0.094448	-0.0267933	0.379223	-0.286966	-0.242814	0.295704	-0.770148	-0.491575	0.33197	0.110603	-0.157789	-0.0819154	-0.224834	-0.081721	-0.410962	0.0287185	-0.546802	0.051921	-0.0291165	-0.057078	-0.0654156	-0.0920246	0.208433	0.00623563	-0.588667	-0.471568	-0.326799	-0.0442043	0.0978228	-0.293149	0.382775	-0.0347971	0.201698	-0.417961	-0.559711	-0.706694	-0.451735	-0.458979	-0.201136	-0.496583	0.0648628	-0.508065	-0.361889	0.371735
-4.59794	-0.406112	-1.0926	0.113041	-0.153725	-0.126906	-0.0957807	-0.0263427	0.379865	-0.28603	-0.241796	0.295146	-0.770436	-0.490156	0.332495	0.112487	-0.157426	-0.0816471	-0.225576	-0.08128	-0.41086	0.0299643	-0.547275	0.0530771	-0.0295994	-0.0570084	-0.0648112	-0.0920958	0.209147	0.00729174	-0.589785	-0.470284	-0.327168	-0.0444386	0.0966965	-0.293375	0.383636	-0.0348445	0.203872	-0.415433	-0.55988	-0.706263	-0.45096	-0.458131	-0.201946	-0.494618	0.0655466	-0.507409	-0.36144	0.370953
-4.59695	-0.404431	-1.09268	0.113503	-0.153255	-0.125829	-0.0971045	-0.0259036	0.380511	-0.285104	-0.240775	0.294585	-0.770717	-0.488728	0.333016	0.114368	-0.15706	-0.081386	-0.226317	-0.0808517	-0.410758	0.0312185	-0.547741	0.0542258	-0.0300946	-0.0569343	-0.0642099	-0.0921666	0.209856	0.00834381	-0.590902	-0.469	-0.327528	-0.0446736	0.0955655	-0.293609	0.384495	-0.034893	0.206045	-0.412886	-0.560038	-0.705838	-0.450168	-0.457272	-0.202752	-0.492647	0.0662185	-0.506753	-0.360996	0.370168
-4.59597	-0.402748	-1.09275	0.113963	-0.152782	-0.124746	-0.0984192	-0.0254762	0.38116	-0.284188	-0.239753	0.294021	-0.770991	-0.487293	0.333533	0.116247	-0.15669	-0.081132	-0.227056	-0.0804361	-0.410655	0.0324811	-0.548202	0.0553673	-0.0306021	-0.0568556	-0.0636116	-0.0922368	0.21056	0.00939174	-0.592019	-0.467715	-0.327879	-0.0449095	0.0944299	-0.293851	0.385351	-0.0349428	0.208215	-0.410323	-0.560184	-0.705418	-0.449361	-0.456403	-0.203553	-0.490671	0.0668786	-0.506096	-0.360557	0.36938
-4.59499	-0.401062	-1.09281	0.114418	-0.152306	-0.123658	-0.0997246	-0.0250606	0.381811	-0.283282	-0.238729	0.293453	-0.771258	-0.485849	0.334046	0.118125	-0.156318	-0.0808852	-0.227792	-0.0800332	-0.410553	0.033752	-0.548657	0.0565015	-0.0311219	-0.0567724	-0.0630162	-0.0923066	0.211259	0.0104354	-0.593134	-0.46643	-0.328221	-0.045146	0.0932899	-0.294101	0.386205	-0.0349939	0.210384	-0.407741	-0.560319	-0.705005	-0.448536	-0.455524	-0.204349	-0.488689	0.0675267	-0.505439	-0.360122	0.36859
-4.594	-0.399374	-1.09284	0.11487	-0.151827	-0.122565	-0.101021	-0.0246571	0.382465	-0.282386	-0.237704	0.292883	-0.771519	-0.484398	0.334555	0.12	-0.155943	-0.0806457	-0.228526	-0.0796431	-0.410449	0.035031	-0.549106	0.0576285	-0.0316537	-0.0566848	-0.0624239	-0.092376	0.211952	0.0114747	-0.594248	-0.465145	-0.328554	-0.045383	0.0921454	-0.294359	0.387056	-0.0350461	0.212551	-0.405142	-0.560442	-0.704597	-0.447696	-0.454634	-0.205141	-0.486702	0.068163	-0.504781	-0.359693	0.367798
-4.59302	-0.397683	-1.09285	0.115319	-0.151345	-0.121467	-0.102307	-0.0242658	0.383121	-0.281501	-0.236678	0.292309	-0.771772	-0.482939	0.335061	0.121873	-0.155565	-0.0804136	-0.229258	-0.0792656	-0.410346	0.036318	-0.549549	0.0587484	-0.0321975	-0.0565926	-0.0618345	-0.092445	0.212639	0.0125096	-0.59536	-0.463859	-0.328878	-0.0456205	0.0909967	-0.294624	0.387905	-0.0350996	0.214715	-0.402526	-0.560554	-0.704195	-0.446839	-0.453734	-0.205928	-0.48471	0.0687874	-0.504123	-0.359268	0.367003
-4.59204	-0.39599	-1.09285	0.115764	-0.15086	-0.120363	-0.103584	-0.0238867	0.383779	-0.280625	-0.23565	0.291733	-0.772018	-0.481473	0.335563	0.123744	-0.155185	-0.0801889	-0.229988	-0.078901	-0.410242	0.037613	-0.549985	0.0598611	-0.0327533	-0.0564961	-0.061248	-0.0925138	0.213321	0.01354	-0.596471	-0.462573	-0.329191	-0.0458584	0.0898438	-0.294898	0.388751	-0.0351543	0.216877	-0.399892	-0.560654	-0.703799	-0.445966	-0.452825	-0.206711	-0.482713	0.0693999	-0.503465	-0.358848	0.366207
-4.59106	-0.394296	-1.09283	0.116205	-0.150373	-0.119255	-0.104852	-0.0235201	0.38444	-0.27976	-0.234621	0.291154	-0.772257	-0.479998	0.336061	0.125612	-0.154803	-0.0799716	-0.230716	-0.0785491	-0.410138	0.0389159	-0.550415	0.0609668	-0.0333209	-0.0563951	-0.0606645	-0.0925823	0.213996	0.0145656	-0.597581	-0.461287	-0.329496	-0.0460966	0.0886869	-0.29518	0.389594	-0.0352102	0.219036	-0.397242	-0.560742	-0.703409	-0.445076	-0.451905	-0.207489	-0.480711	0.0700007	-0.502806	-0.358433	0.365409
-4.59007	-0.392599	-1.09279	0.116642	-0.149884	-0.118142	-0.106109	-0.0231661	0.385102	-0.278905	-0.233591	0.290572	-0.772488	-0.478516	0.336555	0.127477	-0.154418	-0.0797617	-0.231441	-0.0782101	-0.410033	0.0402264	-0.550838	0.0620654	-0.0339001	-0.0562897	-0.0600839	-0.0926505	0.214666	0.0155866	-0.598689	-0.460002	-0.329791	-0.046335	0.0875261	-0.295471	0.390435	-0.0352673	0.221191	-0.394575	-0.560817	-0.703024	-0.444171	-0.450974	-0.208262	-0.478704	0.0705896	-0.502147	-0.358024	0.364608
-4.58909	-0.390901	-1.09273	0.117075	-0.149392	-0.117024	-0.107357	-0.0228248	0.385767	-0.27806	-0.232561	0.289988	-0.772713	-0.477027	0.337046	0.12934	-0.154032	-0.0795595	-0.232163	-0.0778838	-0.409928	0.0415445	-0.551254	0.0631571	-0.034491	-0.0561799	-0.0595061	-0.0927186	0.21533	0.0166027	-0.599795	-0.458716	-0.330076	-0.0465735	0.0863615	-0.295769	0.391273	-0.0353256	0.223344	-0.391892	-0.560881	-0.702645	-0.443249	-0.450034	-0.209031	-0.476691	0.0711667	-0.501488	-0.357619	0.363806
-4.58811	-0.389202	-1.09266	0.117505	-0.148898	-0.115902	-0.108594	-0.0224963	0.386433	-0.277225	-0.231529	0.289401	-0.772931	-0.47553	0.337532	0.1312	-0.153644	-0.0793648	-0.232883	-0.0775704	-0.409822	0.0428701	-0.551664	0.0642418	-0.0350934	-0.0560657	-0.0589312	-0.0927866	0.215988	0.0176138	-0.600899	-0.457432	-0.330351	-0.0468121	0.0851932	-0.296076	0.392108	-0.0353852	0.225493	-0.389193	-0.560933	-0.702271	-0.442311	-0.449084	-0.209795	-0.474674	0.071732	-0.500829	-0.357219	0.363003
-4.58712	-0.387501	-1.09256	0.11793	-0.148403	-0.114775	-0.109822	-0.0221808	0.387101	-0.276402	-0.230497	0.288812	-0.773141	-0.474026	0.338016	0.133057	-0.153254	-0.0791778	-0.233599	-0.0772698	-0.409716	0.0442031	-0.552066	0.0653196	-0.0357073	-0.0559472	-0.0583591	-0.0928545	0.21664	0.0186199	-0.602001	-0.456147	-0.330617	-0.0470506	0.0840213	-0.296391	0.392941	-0.035446	0.227638	-0.386478	-0.560973	-0.701903	-0.441356	-0.448124	-0.210555	-0.472653	0.0722855	-0.500169	-0.356824	0.362198
-4.58614	-0.385799	-1.09244	0.118352	-0.147905	-0.113643	-0.111039	-0.0218785	0.38777	-0.275588	-0.229464	0.28822	-0.773345	-0.472514	0.338495	0.134912	-0.152863	-0.0789985	-0.234314	-0.0769821	-0.40961	0.0455433	-0.552461	0.0663906	-0.0363324	-0.0558243	-0.0577898	-0.0929224	0.217285	0.0196209	-0.603101	-0.454864	-0.330872	-0.047289	0.0828459	-0.296715	0.393771	-0.0355079	0.22978	-0.383747	-0.561	-0.70154	-0.440386	-0.447154	-0.21131	-0.470626	0.0728273	-0.49951	-0.356434	0.361392
-4.58516	-0.384097	-1.09231	0.11877	-0.147405	-0.112508	-0.112246	-0.0215895	0.388441	-0.274785	-0.228431	0.287626	-0.773541	-0.470996	0.338971	0.136762	-0.15247	-0.0788269	-0.235025	-0.0767071	-0.409502	0.0468906	-0.552848	0.0674548	-0.0369687	-0.0556972	-0.0572232	-0.0929904	0.217924	0.0206167	-0.604198	-0.453581	-0.331117	-0.0475272	0.0816672	-0.297047	0.394598	-0.0355711	0.231917	-0.381	-0.561015	-0.701183	-0.439399	-0.446174	-0.21206	-0.468595	0.0733574	-0.498851	-0.356049	0.360584
-4.58417	-0.382393	-1.09216	0.119183	-0.146904	-0.111369	-0.113443	-0.0213138	0.389113	-0.273993	-0.227397	0.287029	-0.773731	-0.46947	0.339443	0.13861	-0.152077	-0.0786631	-0.235733	-0.0764451	-0.409395	0.0482449	-0.553228	0.0685123	-0.0376161	-0.0555657	-0.0566594	-0.0930583	0.218556	0.0216071	-0.605293	-0.452299	-0.331352	-0.047765	0.0804853	-0.297387	0.395423	-0.0356355	0.23405	-0.378239	-0.561017	-0.700831	-0.438397	-0.445184	-0.212806	-0.46656	0.0738757	-0.498191	-0.355669	0.359776
-4.58319	-0.380689	-1.09199	0.119593	-0.146401	-0.110225	-0.114628	-0.0210517	0.389785	-0.273212	-0.226363	0.286431	-0.773913	-0.467937	0.339911	0.140454	-0.151682	-0.0785071	-0.236439	-0.0761959	-0.409287	0.0496062	-0.5536	0.0695631	-0.0382745	-0.05543	-0.0560984	-0.0931264	0.219181	0.0225921	-0.606386	-0.451018	-0.331577	-0.0480025	0.0793002	-0.297736	0.396244	-0.035701	0.236179	-0.375462	-0.561007	-0.700484	-0.437378	-0.444184	-0.213547	-0.46452	0.0743824	-0.497532	-0.355294	0.358967
-4.58221	-0.378985	-1.0918	0.119999	-0.145896	-0.109078	-0.115804	-0.0208032	0.390459	-0.272441	-0.225329	0.28583	-0.774088	-0.466397	0.340376	0.142295	-0.151287	-0.078359	-0.237141	-0.0759595	-0.409178	0.0509741	-0.553964	0.0706073	-0.0389437	-0.0552901	-0.0555399	-0.0931947	0.2198	0.0235716	-0.607476	-0.449739	-0.331792	-0.0482395	0.0781121	-0.298094	0.397063	-0.0357678	0.238303	-0.372671	-0.560985	-0.700143	-0.436344	-0.443174	-0.214284	-0.462476	0.0748774	-0.496872	-0.354924	0.358156
-4.58122	-0.37728	-1.09159	0.1204	-0.14539	-0.107927	-0.116968	-0.0205685	0.391134	-0.271681	-0.224295	0.285228	-0.774256	-0.46485	0.340837	0.144132	-0.150891	-0.0782188	-0.23784	-0.075736	-0.409068	0.0523488	-0.554321	0.071645	-0.0396237	-0.055146	-0.0549842	-0.0932631	0.220412	0.0245454	-0.608563	-0.44846	-0.331996	-0.048476	0.0769212	-0.29846	0.397879	-0.0358357	0.240422	-0.369864	-0.560949	-0.699806	-0.435293	-0.442155	-0.215016	-0.460427	0.0753607	-0.496213	-0.354559	0.357346
-4.58024	-0.375575	-1.09136	0.120797	-0.144883	-0.106773	-0.118122	-0.0203477	0.391809	-0.270932	-0.223262	0.284623	-0.774416	-0.463297	0.341294	0.145965	-0.150495	-0.0780866	-0.238536	-0.0755253	-0.408958	0.0537299	-0.554669	0.0726762	-0.0403144	-0.0549977	-0.054431	-0.0933318	0.221017	0.0255136	-0.609647	-0.447184	-0.33219	-0.0487118	0.0757274	-0.298835	0.398693	-0.0359049	0.242535	-0.367044	-0.560901	-0.699475	-0.434226	-0.441125	-0.215743	-0.458375	0.0758325	-0.495554	-0.354199	0.356534
-4.57926	-0.37387	-1.09111	0.12119	-0.144375	-0.105615	-0.119265	-0.020141	0.392484	-0.270193	-0.222228	0.284017	-0.77457	-0.461737	0.341748	0.147795	-0.150098	-0.0779624	-0.239228	-0.0753274	-0.408847	0.0551175	-0.555008	0.0737009	-0.0410155	-0.0548452	-0.0538805	-0.0934008	0.221614	0.026476	-0.610728	-0.445909	-0.332373	-0.048947	0.074531	-0.299218	0.399503	-0.0359752	0.244644	-0.36421	-0.560841	-0.699149	-0.433144	-0.440087	-0.216466	-0.456318	0.0762926	-0.494895	-0.353844	0.355722
-4.57828	-0.372165	-1.09084	0.121579	-0.143865	-0.104454	-0.120396	-0.0199484	0.39316	-0.269466	-0.221195	0.283409	-0.774716	-0.46017	0.342198	0.149621	-0.149701	-0.0778463	-0.239917	-0.0751423	-0.408736	0.0565114	-0.555339	0.0747193	-0.0417271	-0.0546885	-0.0533324	-0.0934701	0.222205	0.0274326	-0.611806	-0.444635	-0.332545	-0.0491814	0.0733321	-0.29961	0.40031	-0.0360466	0.246747	-0.361361	-0.560767	-0.698827	-0.432046	-0.439038	-0.217184	-0.454257	0.0767412	-0.494236	-0.353494	0.35491
-4.57729	-0.370461	-1.09056	0.121964	-0.143355	-0.10329	-0.121517	-0.0197701	0.393836	-0.268749	-0.220162	0.282799	-0.774856	-0.458596	0.342645	0.151442	-0.149304	-0.0777383	-0.240603	-0.0749701	-0.408624	0.0579114	-0.555662	0.0757314	-0.042449	-0.0545278	-0.0527869	-0.0935398	0.222788	0.0283832	-0.612881	-0.443364	-0.332707	-0.0494149	0.0721307	-0.300011	0.401115	-0.0361192	0.248844	-0.358499	-0.560681	-0.698511	-0.430932	-0.43798	-0.217897	-0.452193	0.0771782	-0.493578	-0.35315	0.354098
-4.57631	-0.368758	-1.09025	0.122344	-0.142844	-0.102122	-0.122626	-0.0196062	0.394512	-0.268044	-0.21913	0.282188	-0.774988	-0.457016	0.343088	0.153259	-0.148908	-0.0776384	-0.241285	-0.0748106	-0.408511	0.0593174	-0.555976	0.0767372	-0.0431811	-0.054363	-0.0522439	-0.0936099	0.223364	0.0293277	-0.613952	-0.442094	-0.332858	-0.0496475	0.0709271	-0.300421	0.401916	-0.036193	0.250935	-0.355624	-0.560581	-0.698199	-0.429802	-0.436913	-0.218606	-0.450124	0.0776037	-0.49292	-0.35281	0.353286
-4.57533	-0.367055	-1.08993	0.12272	-0.142332	-0.100952	-0.123724	-0.0194568	0.395188	-0.267349	-0.218098	0.281575	-0.775113	-0.45543	0.343528	0.155072	-0.148512	-0.0775466	-0.241963	-0.074664	-0.408398	0.0607294	-0.55628	0.0777369	-0.0439233	-0.0541941	-0.0517032	-0.0936804	0.223932	0.0302661	-0.61502	-0.440826	-0.332998	-0.0498792	0.0697212	-0.30084	0.402715	-0.0362679	0.25302	-0.352735	-0.560469	-0.697892	-0.428656	-0.435836	-0.21931	-0.448052	0.0780177	-0.492262	-0.352475	0.352474
-4.57434	-0.365352	-1.08958	0.123091	-0.141819	-0.0997796	-0.124811	-0.0193221	0.395864	-0.266665	-0.217067	0.280961	-0.775231	-0.453838	0.343964	0.156881	-0.148116	-0.0774631	-0.242638	-0.0745301	-0.408283	0.0621471	-0.556576	0.0787305	-0.0446754	-0.0540211	-0.051165	-0.0937514	0.224492	0.0311982	-0.616085	-0.439561	-0.333127	-0.0501097	0.0685132	-0.301267	0.403511	-0.0363439	0.255099	-0.349834	-0.560343	-0.69759	-0.427495	-0.434749	-0.220009	-0.445976	0.0784203	-0.491604	-0.352146	0.351662
-4.57336	-0.363651	-1.08922	0.123459	-0.141306	-0.0986043	-0.125886	-0.0192022	0.396539	-0.265993	-0.216037	0.280345	-0.775342	-0.452239	0.344396	0.158685	-0.147722	-0.0773879	-0.243309	-0.0744089	-0.408168	0.0635705	-0.556863	0.079718	-0.0454373	-0.0538442	-0.0506292	-0.093823	0.225045	0.0321241	-0.617145	-0.438298	-0.333246	-0.0503391	0.0673033	-0.301703	0.404303	-0.0364211	0.257171	-0.34692	-0.560204	-0.697292	-0.426318	-0.433653	-0.220704	-0.443896	0.0788114	-0.490947	-0.351821	0.35085
-4.57238	-0.361952	-1.08883	0.123821	-0.140793	-0.0974265	-0.12695	-0.0190971	0.397214	-0.265332	-0.215008	0.279728	-0.775445	-0.450634	0.344825	0.160485	-0.147328	-0.0773209	-0.243976	-0.0743004	-0.408052	0.0649995	-0.55714	0.0806996	-0.046209	-0.0536632	-0.0500956	-0.0938951	0.22559	0.0330436	-0.618202	-0.437038	-0.333353	-0.0505673	0.0660916	-0.302149	0.405093	-0.0364994	0.259237	-0.343994	-0.560052	-0.696999	-0.425125	-0.432548	-0.221394	-0.441813	0.0791912	-0.490291	-0.351502	0.350039
-4.57139	-0.360253	-1.08843	0.12418	-0.140279	-0.0962465	-0.128001	-0.019007	0.397888	-0.264681	-0.21398	0.27911	-0.775542	-0.449023	0.345251	0.16228	-0.146935	-0.0772623	-0.244639	-0.0742047	-0.407936	0.0664338	-0.557407	0.0816753	-0.0469902	-0.0534783	-0.0495644	-0.0939678	0.226127	0.0339565	-0.619254	-0.43578	-0.333449	-0.0507942	0.064878	-0.302603	0.405879	-0.0365788	0.261295	-0.341055	-0.559887	-0.69671	-0.423917	-0.431434	-0.22208	-0.439727	0.0795596	-0.489635	-0.351187	0.349228
-4.57041	-0.358556	-1.08801	0.124534	-0.139765	-0.0950644	-0.129041	-0.018932	0.398561	-0.264043	-0.212953	0.27849	-0.775631	-0.447407	0.345673	0.16407	-0.146544	-0.077212	-0.245298	-0.0741216	-0.407818	0.0678735	-0.557665	0.0826452	-0.0477809	-0.0532895	-0.0490353	-0.0940412	0.226656	0.034863	-0.620303	-0.434525	-0.333533	-0.0510198	0.0636629	-0.303066	0.406663	-0.0366592	0.263347	-0.338105	-0.559709	-0.696426	-0.422694	-0.430311	-0.22276	-0.437637	0.0799167	-0.488979	-0.350878	0.348419
-4.56943	-0.356861	-1.08756	0.124883	-0.139251	-0.0938802	-0.13007	-0.0188722	0.399233	-0.263415	-0.211928	0.27787	-0.775713	-0.445784	0.346092	0.165855	-0.146153	-0.0771702	-0.245953	-0.0740512	-0.4077	0.0693183	-0.557913	0.0836094	-0.048581	-0.0530968	-0.0485085	-0.0941152	0.227177	0.0357628	-0.621347	-0.433273	-0.333607	-0.0512439	0.0624463	-0.303538	0.407443	-0.0367408	0.265391	-0.335143	-0.559517	-0.696146	-0.421455	-0.429178	-0.223437	-0.435544	0.0802624	-0.488324	-0.350574	0.34761
-4.56845	-0.355168	-1.0871	0.125228	-0.138737	-0.0926943	-0.131086	-0.0188277	0.399904	-0.262798	-0.210904	0.277248	-0.775788	-0.444156	0.346508	0.167635	-0.145765	-0.0771368	-0.246603	-0.0739934	-0.407581	0.0707681	-0.558151	0.084568	-0.0493902	-0.0529001	-0.0479838	-0.09419	0.227689	0.0366559	-0.622387	-0.432024	-0.333669	-0.0514666	0.0612283	-0.30402	0.40822	-0.0368234	0.267427	-0.332169	-0.559312	-0.69587	-0.420201	-0.428037	-0.224108	-0.433448	0.080597	-0.48767	-0.350274	0.346802
-4.56746	-0.353477	-1.08662	0.125568	-0.138223	-0.0915066	-0.13209	-0.0187986	0.400574	-0.262193	-0.209882	0.276626	-0.775856	-0.442522	0.34692	0.169409	-0.145378	-0.0771119	-0.24725	-0.0739482	-0.407461	0.0722228	-0.558379	0.0855209	-0.0502086	-0.0526997	-0.0474612	-0.0942656	0.228193	0.0375422	-0.623423	-0.430778	-0.33372	-0.0516877	0.060009	-0.30451	0.408994	-0.0369071	0.269456	-0.329184	-0.559093	-0.695598	-0.418931	-0.426886	-0.224775	-0.431349	0.0809203	-0.487016	-0.34998	0.345995
-4.56648	-0.351788	-1.08612	0.125904	-0.137709	-0.0903174	-0.133082	-0.0187851	0.401242	-0.261599	-0.208861	0.276002	-0.775917	-0.440883	0.347328	0.171179	-0.144993	-0.0770954	-0.247892	-0.0739155	-0.40734	0.0736823	-0.558597	0.0864684	-0.0510359	-0.0524954	-0.0469406	-0.0943419	0.228689	0.0384216	-0.624454	-0.429535	-0.333759	-0.0519072	0.0587885	-0.305009	0.409765	-0.0369918	0.271477	-0.326189	-0.558861	-0.69533	-0.417647	-0.425727	-0.225437	-0.429246	0.0812324	-0.486363	-0.349691	0.34519
-4.5655	-0.350101	-1.0856	0.126235	-0.137195	-0.0891268	-0.134062	-0.0187872	0.401909	-0.261017	-0.207842	0.275378	-0.775971	-0.439238	0.347734	0.172943	-0.144611	-0.0770875	-0.24853	-0.0738954	-0.407219	0.0751464	-0.558804	0.0874104	-0.0518721	-0.0522873	-0.0464221	-0.094419	0.229176	0.0392941	-0.62548	-0.428295	-0.333787	-0.0521251	0.057567	-0.305518	0.410533	-0.0370776	0.27349	-0.323183	-0.558615	-0.695066	-0.416347	-0.424558	-0.226095	-0.427141	0.0815334	-0.485711	-0.349407	0.344386
-4.56451	-0.348417	-1.08505	0.126562	-0.136682	-0.087935	-0.135029	-0.018805	0.402574	-0.260445	-0.206824	0.274753	-0.776018	-0.437588	0.348136	0.174702	-0.14423	-0.0770882	-0.249163	-0.0738877	-0.407096	0.0766151	-0.559001	0.0883471	-0.0527169	-0.0520754	-0.0459055	-0.0944971	0.229655	0.0401595	-0.626501	-0.427059	-0.333803	-0.0523412	0.0563446	-0.306036	0.411297	-0.0371644	0.275494	-0.320166	-0.558356	-0.694807	-0.415031	-0.423382	-0.226748	-0.425033	0.0818233	-0.48506	-0.349127	0.343583
-4.56353	-0.346736	-1.08449	0.126884	-0.136169	-0.086742	-0.135984	-0.0188387	0.403237	-0.259885	-0.205809	0.274127	-0.776057	-0.435932	0.348535	0.176455	-0.143852	-0.0770975	-0.249792	-0.0738925	-0.406973	0.0780881	-0.559187	0.0892785	-0.0535704	-0.0518598	-0.0453909	-0.094576	0.230125	0.0410179	-0.627518	-0.425827	-0.333807	-0.0525555	0.0551213	-0.306562	0.412058	-0.0372522	0.277491	-0.31714	-0.558083	-0.69455	-0.413701	-0.422196	-0.227396	-0.422923	0.0821022	-0.484409	-0.348853	0.342783
-4.56255	-0.345057	-1.08391	0.127201	-0.135657	-0.0855482	-0.136927	-0.0188883	0.403898	-0.259337	-0.204796	0.2735	-0.77609	-0.434272	0.348931	0.178202	-0.143477	-0.0771154	-0.250416	-0.0739098	-0.406848	0.0795654	-0.559362	0.0902048	-0.0544323	-0.0516405	-0.0448781	-0.0946558	0.230586	0.041869	-0.628529	-0.424599	-0.3338	-0.0527679	0.0538974	-0.307098	0.412816	-0.037341	0.279478	-0.314104	-0.557796	-0.694298	-0.412356	-0.421002	-0.22804	-0.420809	0.08237	-0.483759	-0.348584	0.341984
-4.56156	-0.343382	-1.08331	0.127514	-0.135146	-0.0843535	-0.137857	-0.0189539	0.404556	-0.2588	-0.203785	0.272873	-0.776115	-0.432606	0.349323	0.179944	-0.143104	-0.077142	-0.251035	-0.0739393	-0.406723	0.0810467	-0.559526	0.091126	-0.0553025	-0.0514176	-0.0443671	-0.0947366	0.231038	0.042713	-0.629535	-0.423374	-0.333782	-0.0529785	0.0526728	-0.307644	0.41357	-0.0374307	0.281457	-0.311058	-0.557496	-0.694049	-0.410996	-0.419799	-0.228678	-0.418693	0.0826268	-0.48311	-0.34832	0.341187
-4.56058	-0.34171	-1.08269	0.127822	-0.134635	-0.0831583	-0.138775	-0.0190356	0.405212	-0.258274	-0.202776	0.272246	-0.776134	-0.430936	0.349713	0.18168	-0.142734	-0.0771773	-0.25165	-0.0739812	-0.406597	0.0825321	-0.559679	0.0920422	-0.0561809	-0.0511909	-0.0438578	-0.0948184	0.231481	0.0435496	-0.630536	-0.422153	-0.333751	-0.053187	0.0514478	-0.308198	0.414322	-0.0375214	0.283426	-0.308002	-0.557182	-0.693804	-0.409621	-0.418588	-0.229313	-0.416575	0.0828727	-0.482462	-0.348061	0.340392
-4.5596	-0.340041	-1.08205	0.128125	-0.134125	-0.0819626	-0.13968	-0.0191335	0.405866	-0.25776	-0.201769	0.271618	-0.776145	-0.429261	0.350099	0.183409	-0.142368	-0.0772213	-0.25226	-0.0740354	-0.40647	0.0840213	-0.559821	0.0929535	-0.0570674	-0.0509607	-0.0433503	-0.0949012	0.231915	0.0443788	-0.631531	-0.420937	-0.333708	-0.0533936	0.0502224	-0.308762	0.41507	-0.0376131	0.285387	-0.304938	-0.556855	-0.693562	-0.408231	-0.417368	-0.229942	-0.414454	0.0831077	-0.481815	-0.347807	0.339599
-4.55862	-0.338376	-1.08139	0.128424	-0.133616	-0.0807665	-0.140572	-0.0192478	0.406517	-0.257258	-0.200765	0.270989	-0.77615	-0.427581	0.350482	0.185133	-0.142005	-0.077274	-0.252865	-0.0741019	-0.406342	0.0855143	-0.559951	0.0938599	-0.0579618	-0.0507268	-0.0428445	-0.0949851	0.232339	0.0452005	-0.632521	-0.419724	-0.333654	-0.053598	0.0489968	-0.309335	0.415814	-0.0377057	0.287338	-0.301865	-0.556513	-0.693324	-0.406827	-0.41614	-0.230568	-0.412331	0.0833319	-0.481169	-0.347557	0.338809
-4.55763	-0.336714	-1.08071	0.128718	-0.133107	-0.0795703	-0.141452	-0.0193784	0.407166	-0.256766	-0.199763	0.270361	-0.776147	-0.425897	0.350862	0.18685	-0.141645	-0.0773355	-0.253464	-0.0741805	-0.406213	0.0870108	-0.56007	0.0947617	-0.058864	-0.0504894	-0.0423403	-0.0950701	0.232755	0.0460148	-0.633506	-0.418517	-0.333588	-0.0538003	0.047771	-0.309917	0.416555	-0.0377992	0.289279	-0.298783	-0.556158	-0.693089	-0.405408	-0.414904	-0.231188	-0.410205	0.0835452	-0.480524	-0.347313	0.338021
-4.55665	-0.335057	-1.08001	0.129007	-0.1326	-0.0783741	-0.142318	-0.0195255	0.407811	-0.256287	-0.198765	0.269732	-0.776137	-0.424208	0.351239	0.188561	-0.141288	-0.0774058	-0.254059	-0.0742712	-0.406082	0.0885108	-0.560177	0.0956587	-0.0597739	-0.0502484	-0.0418376	-0.0951562	0.233161	0.0468214	-0.634484	-0.417313	-0.33351	-0.0540005	0.0465453	-0.310508	0.417293	-0.0378936	0.291211	-0.295694	-0.555789	-0.692857	-0.403974	-0.41366	-0.231804	-0.408078	0.0837478	-0.47988	-0.347073	0.337236
-4.55567	-0.333403	-1.07929	0.129291	-0.132094	-0.0771781	-0.143172	-0.0196892	0.408453	-0.255819	-0.197768	0.269103	-0.77612	-0.422515	0.351613	0.190266	-0.140936	-0.0774849	-0.254649	-0.0743741	-0.405951	0.0900141	-0.560272	0.0965512	-0.0606913	-0.050004	-0.0413364	-0.0952434	0.233557	0.0476204	-0.635457	-0.416114	-0.333419	-0.0541984	0.0453196	-0.311109	0.418027	-0.0379889	0.293133	-0.292596	-0.555406	-0.692628	-0.402526	-0.412408	-0.232415	-0.405948	0.0839397	-0.479237	-0.346839	0.336453
-4.55468	-0.331754	-1.07855	0.129571	-0.13159	-0.0759824	-0.144013	-0.0198696	0.409092	-0.255362	-0.196775	0.268473	-0.776097	-0.420817	0.351984	0.191964	-0.140587	-0.0775728	-0.255234	-0.074489	-0.405819	0.0915206	-0.560355	0.0974393	-0.0616161	-0.0497561	-0.0408367	-0.0953318	0.233944	0.0484116	-0.636423	-0.41492	-0.333317	-0.054394	0.0440941	-0.311719	0.418758	-0.038085	0.295044	-0.28949	-0.555009	-0.692402	-0.401063	-0.411147	-0.233021	-0.403817	0.0841209	-0.478595	-0.346609	0.335674
-4.5537	-0.330109	-1.07779	0.129846	-0.131086	-0.0747872	-0.14484	-0.0200666	0.409727	-0.254917	-0.195785	0.267844	-0.776066	-0.419116	0.352351	0.193656	-0.140243	-0.0776696	-0.255813	-0.0746158	-0.405686	0.0930302	-0.560426	0.098323	-0.0625482	-0.0495047	-0.0403384	-0.0954214	0.234322	0.0491951	-0.637384	-0.413731	-0.333203	-0.0545872	0.0428689	-0.312339	0.419485	-0.038182	0.296946	-0.286377	-0.554598	-0.692179	-0.399586	-0.409879	-0.233623	-0.401683	0.0842915	-0.477955	-0.346385	0.334897
-4.55272	-0.328468	-1.07701	0.130116	-0.130584	-0.0735926	-0.145655	-0.0202805	0.410359	-0.254484	-0.194798	0.267214	-0.776028	-0.41741	0.352716	0.19534	-0.139903	-0.0777753	-0.256387	-0.0747546	-0.405552	0.0945427	-0.560485	0.0992024	-0.0634874	-0.0492499	-0.0398414	-0.0955122	0.234689	0.0499707	-0.638338	-0.412547	-0.333076	-0.0547781	0.0416442	-0.312967	0.420209	-0.0382798	0.298837	-0.283257	-0.554174	-0.691959	-0.398095	-0.408603	-0.23422	-0.399548	0.0844515	-0.477315	-0.346165	0.334124
-4.55173	-0.326832	-1.07621	0.130381	-0.130084	-0.0723988	-0.146456	-0.0205113	0.410987	-0.254062	-0.193813	0.266585	-0.775984	-0.415701	0.353078	0.197018	-0.139567	-0.0778898	-0.256956	-0.0749052	-0.405417	0.0960579	-0.560531	0.100078	-0.0644336	-0.0489918	-0.0393457	-0.0956043	0.235047	0.0507384	-0.639286	-0.411368	-0.332938	-0.0549665	0.04042	-0.313605	0.420929	-0.0383785	0.300717	-0.28013	-0.553735	-0.691741	-0.39659	-0.40732	-0.234813	-0.397411	0.084601	-0.476677	-0.34595	0.333354
-4.55075	-0.325201	-1.07539	0.130641	-0.129585	-0.0712059	-0.147244	-0.020759	0.411611	-0.253651	-0.192833	0.265955	-0.775932	-0.413988	0.353438	0.198689	-0.139236	-0.0780133	-0.257519	-0.0750676	-0.405281	0.0975758	-0.560565	0.100949	-0.0653866	-0.0487303	-0.0388512	-0.0956977	0.235395	0.0514981	-0.640227	-0.410194	-0.332787	-0.0551525	0.0391964	-0.314253	0.421645	-0.0384778	0.302587	-0.276997	-0.553283	-0.691526	-0.39507	-0.406029	-0.235401	-0.395273	0.0847401	-0.47604	-0.34574	0.332587
-4.54977	-0.323575	-1.07455	0.130897	-0.129088	-0.0700142	-0.148019	-0.0210238	0.412231	-0.253253	-0.191855	0.265326	-0.775874	-0.412271	0.353794	0.200353	-0.13891	-0.0781458	-0.258077	-0.0752418	-0.405144	0.0990963	-0.560586	0.101816	-0.0663464	-0.0484654	-0.0383579	-0.0957923	0.235733	0.0522497	-0.641162	-0.409025	-0.332624	-0.0553359	0.0379737	-0.314909	0.422358	-0.038578	0.304445	-0.273857	-0.552816	-0.691313	-0.393537	-0.40473	-0.235984	-0.393133	0.0848687	-0.475405	-0.345534	0.331824
-4.54878	-0.321954	-1.07369	0.131147	-0.128592	-0.0688238	-0.14878	-0.0213057	0.412847	-0.252865	-0.190881	0.264697	-0.775809	-0.410551	0.354148	0.20201	-0.138588	-0.0782872	-0.258629	-0.0754277	-0.405006	0.100619	-0.560594	0.102679	-0.0673128	-0.0481973	-0.0378657	-0.0958883	0.236061	0.0529933	-0.64209	-0.407862	-0.332449	-0.0555167	0.0367518	-0.315575	0.423068	-0.0386789	0.306293	-0.270711	-0.552336	-0.691103	-0.391989	-0.403425	-0.236563	-0.390991	0.084987	-0.47477	-0.345334	0.331065
-4.5478	-0.320339	-1.07281	0.131393	-0.128098	-0.0676348	-0.149528	-0.0216047	0.413458	-0.25249	-0.18991	0.264068	-0.775737	-0.408827	0.354498	0.20366	-0.138272	-0.0784375	-0.259175	-0.0756251	-0.404867	0.102144	-0.560589	0.103538	-0.0682856	-0.047926	-0.0373745	-0.0959857	0.236379	0.0537287	-0.643011	-0.406704	-0.332261	-0.055695	0.0355309	-0.316251	0.423773	-0.0387805	0.308129	-0.267559	-0.551842	-0.690895	-0.390428	-0.402111	-0.237137	-0.388848	0.0850949	-0.474138	-0.345138	0.330309
-4.54682	-0.318729	-1.07192	0.131634	-0.127606	-0.0664474	-0.150263	-0.0219211	0.414065	-0.252126	-0.188943	0.263439	-0.775658	-0.4071	0.354846	0.205302	-0.137961	-0.0785968	-0.259716	-0.0758341	-0.404727	0.103671	-0.560571	0.104394	-0.0692647	-0.0476514	-0.0368844	-0.0960844	0.236686	0.054456	-0.643926	-0.405552	-0.332061	-0.0558706	0.034311	-0.316936	0.424475	-0.0388829	0.309954	-0.264402	-0.551333	-0.69069	-0.388853	-0.400791	-0.237707	-0.386704	0.0851926	-0.473506	-0.344947	0.329557
-4.54584	-0.317124	-1.071	0.13187	-0.127116	-0.0652618	-0.150983	-0.0222547	0.414667	-0.251774	-0.18798	0.26281	-0.775572	-0.40537	0.355191	0.206937	-0.137656	-0.0787652	-0.260251	-0.0760546	-0.404586	0.1052	-0.56054	0.105246	-0.07025	-0.0473736	-0.0363952	-0.0961845	0.236983	0.0551749	-0.644833	-0.404406	-0.331849	-0.0560435	0.0330924	-0.31763	0.425173	-0.0389859	0.311767	-0.261239	-0.550811	-0.690486	-0.387264	-0.399463	-0.238271	-0.384559	0.0852801	-0.472876	-0.344761	0.32881
-4.54485	-0.315526	-1.07006	0.132102	-0.126628	-0.0640781	-0.151691	-0.0226057	0.415265	-0.251433	-0.18702	0.262182	-0.775479	-0.403637	0.355534	0.208565	-0.137356	-0.0789425	-0.26078	-0.0762865	-0.404444	0.106731	-0.560496	0.106095	-0.0712413	-0.0470926	-0.0359068	-0.096286	0.23727	0.0558856	-0.645733	-0.403266	-0.331624	-0.0562136	0.0318751	-0.318333	0.425868	-0.0390895	0.313569	-0.258072	-0.550275	-0.690284	-0.385662	-0.398129	-0.238832	-0.382412	0.0853575	-0.472248	-0.344579	0.328067
-4.54387	-0.313933	-1.0691	0.132328	-0.126141	-0.0628966	-0.152385	-0.0229742	0.415857	-0.251104	-0.186065	0.261555	-0.77538	-0.4019	0.355874	0.210184	-0.137061	-0.0791289	-0.261303	-0.0765298	-0.404301	0.108264	-0.560438	0.10694	-0.0722385	-0.0468085	-0.0354193	-0.096389	0.237547	0.0565878	-0.646626	-0.402132	-0.331387	-0.056381	0.0306593	-0.319046	0.426558	-0.0391938	0.315358	-0.254899	-0.549725	-0.690085	-0.384046	-0.396788	-0.239387	-0.380265	0.0854247	-0.471621	-0.344402	0.327328
-4.54289	-0.312347	-1.06812	0.13255	-0.125657	-0.0617173	-0.153065	-0.0233602	0.416445	-0.250786	-0.185113	0.260927	-0.775274	-0.400162	0.356211	0.211796	-0.136773	-0.0793243	-0.261821	-0.0767843	-0.404157	0.109798	-0.560367	0.107782	-0.0732415	-0.0465213	-0.0349326	-0.0964934	0.237812	0.0572817	-0.647511	-0.401004	-0.331138	-0.0565456	0.029445	-0.319768	0.427245	-0.0392987	0.317136	-0.251723	-0.549161	-0.689887	-0.382417	-0.395439	-0.239938	-0.378116	0.0854819	-0.470995	-0.34423	0.326593
-4.5419	-0.310767	-1.06713	0.132766	-0.125176	-0.0605404	-0.153731	-0.0237638	0.417027	-0.25048	-0.184166	0.260301	-0.775161	-0.39842	0.356546	0.213401	-0.136491	-0.0795288	-0.262332	-0.07705	-0.404011	0.111334	-0.560281	0.108621	-0.0742501	-0.0462311	-0.0344465	-0.0965993	0.238068	0.057967	-0.64839	-0.399882	-0.330876	-0.0567074	0.0282323	-0.320499	0.427928	-0.0394042	0.318901	-0.248542	-0.548583	-0.68969	-0.380774	-0.394085	-0.240485	-0.375967	0.0855292	-0.470371	-0.344062	0.325864
-4.54092	-0.309193	-1.06611	0.132978	-0.124696	-0.0593661	-0.154384	-0.024185	0.417603	-0.250186	-0.183222	0.259674	-0.775041	-0.396676	0.356878	0.214997	-0.136215	-0.0797423	-0.262837	-0.0773268	-0.403865	0.112871	-0.560182	0.109456	-0.0752642	-0.0459378	-0.033961	-0.0967067	0.238312	0.0586439	-0.64926	-0.398767	-0.330602	-0.0568663	0.0270214	-0.32124	0.428608	-0.0395103	0.320654	-0.245358	-0.547991	-0.689495	-0.379118	-0.392723	-0.241027	-0.373817	0.0855665	-0.469749	-0.343899	0.325139
-4.53994	-0.307626	-1.06507	0.133185	-0.124218	-0.0581945	-0.155023	-0.0246239	0.418174	-0.249903	-0.182283	0.259049	-0.774915	-0.39493	0.357208	0.216586	-0.135945	-0.0799648	-0.263336	-0.0776146	-0.403718	0.114409	-0.560069	0.110289	-0.0762836	-0.0456415	-0.0334762	-0.0968156	0.238546	0.0593122	-0.650123	-0.397658	-0.330315	-0.0570222	0.0258123	-0.32199	0.429283	-0.0396168	0.322394	-0.24217	-0.547385	-0.689302	-0.377449	-0.391356	-0.241564	-0.371666	0.0855939	-0.469128	-0.34374	0.324419
-4.53895	-0.306066	-1.06402	0.133387	-0.123743	-0.0570259	-0.155648	-0.0250805	0.418739	-0.249632	-0.181348	0.258424	-0.774782	-0.393181	0.357535	0.218166	-0.135682	-0.0801965	-0.263829	-0.0779134	-0.403569	0.115948	-0.559942	0.111118	-0.0773083	-0.0453422	-0.0329918	-0.096926	0.238769	0.0599718	-0.650978	-0.396555	-0.330016	-0.0571753	0.0246052	-0.322749	0.429954	-0.039724	0.324122	-0.238978	-0.546765	-0.68911	-0.375767	-0.389981	-0.242097	-0.369515	0.0856116	-0.468509	-0.343586	0.323703
-4.53797	-0.304512	-1.06294	0.133584	-0.123271	-0.0558603	-0.156259	-0.0255549	0.419299	-0.249373	-0.180418	0.257799	-0.774643	-0.39143	0.357859	0.219738	-0.135425	-0.0804372	-0.264316	-0.0782231	-0.40342	0.117488	-0.5598	0.111945	-0.078338	-0.04504	-0.0325079	-0.0970379	0.238981	0.0606229	-0.651825	-0.39546	-0.329704	-0.0573253	0.0234002	-0.323518	0.430622	-0.0398315	0.325837	-0.235784	-0.546131	-0.688919	-0.374072	-0.388601	-0.242625	-0.367363	0.0856194	-0.467892	-0.343437	0.322994
-4.53699	-0.302966	-1.06185	0.133776	-0.1228	-0.054698	-0.156856	-0.0260472	0.419852	-0.249125	-0.179492	0.257176	-0.774496	-0.389677	0.358181	0.221302	-0.135176	-0.080687	-0.264796	-0.0785436	-0.40327	0.119029	-0.559644	0.112769	-0.0793726	-0.0447349	-0.0320244	-0.0971515	0.239182	0.0612651	-0.652664	-0.394371	-0.32938	-0.0574724	0.0221974	-0.324296	0.431285	-0.0399396	0.327539	-0.232587	-0.545483	-0.688729	-0.372364	-0.387215	-0.243148	-0.365211	0.0856176	-0.467277	-0.343292	0.322289
-4.53601	-0.301427	-1.06073	0.133963	-0.122333	-0.0535391	-0.15744	-0.0265573	0.420399	-0.248888	-0.17857	0.256553	-0.774344	-0.387922	0.358501	0.222857	-0.134933	-0.0809459	-0.26527	-0.0788748	-0.403118	0.12057	-0.559474	0.113591	-0.080412	-0.0444269	-0.0315412	-0.0972666	0.239373	0.0618987	-0.653495	-0.393289	-0.329043	-0.0576165	0.0209968	-0.325083	0.431945	-0.0400481	0.329227	-0.229387	-0.544821	-0.68854	-0.370644	-0.385822	-0.243667	-0.363058	0.0856062	-0.466663	-0.343151	0.32159
-4.53502	-0.299895	-1.0596	0.134145	-0.121867	-0.0523838	-0.158009	-0.0270854	0.42094	-0.248664	-0.177653	0.255931	-0.774184	-0.386166	0.358819	0.224405	-0.134698	-0.0812139	-0.265738	-0.0792167	-0.402966	0.122112	-0.559289	0.11441	-0.0814561	-0.044116	-0.0310583	-0.0973833	0.239552	0.0625235	-0.654318	-0.392214	-0.328694	-0.0577574	0.0197987	-0.325879	0.4326	-0.040157	0.330903	-0.226186	-0.544146	-0.688352	-0.36891	-0.384424	-0.244182	-0.360905	0.0855852	-0.466051	-0.343015	0.320896
-4.53404	-0.298371	-1.05844	0.134323	-0.121405	-0.0512322	-0.158565	-0.0276314	0.421474	-0.24845	-0.176741	0.255309	-0.774018	-0.384408	0.359134	0.225943	-0.13447	-0.0814909	-0.266199	-0.0795691	-0.402812	0.123654	-0.559089	0.115227	-0.0825047	-0.0438024	-0.0305756	-0.0975015	0.23972	0.0631394	-0.655132	-0.391146	-0.328332	-0.0578954	0.0186031	-0.326685	0.433252	-0.0402663	0.332565	-0.222982	-0.543457	-0.688165	-0.367165	-0.38302	-0.244692	-0.358752	0.0855547	-0.465441	-0.342883	0.320208
-4.53306	-0.296855	-1.05727	0.134495	-0.120945	-0.0500846	-0.159106	-0.0281955	0.422002	-0.248249	-0.175834	0.254689	-0.773846	-0.382649	0.359446	0.227473	-0.134249	-0.0817771	-0.266654	-0.0799319	-0.402658	0.125196	-0.558874	0.116041	-0.0835577	-0.0434859	-0.030093	-0.0976214	0.239876	0.0637464	-0.655938	-0.390086	-0.327958	-0.0580302	0.0174101	-0.3275	0.433899	-0.0403759	0.334213	-0.219777	-0.542753	-0.687979	-0.365406	-0.38161	-0.245197	-0.356599	0.0855148	-0.464833	-0.342756	0.319526
-4.53207	-0.295346	-1.05608	0.134663	-0.120487	-0.048941	-0.159633	-0.0287776	0.422523	-0.248059	-0.174932	0.254069	-0.773667	-0.380888	0.359757	0.228994	-0.134036	-0.0820723	-0.267102	-0.0803051	-0.402502	0.126739	-0.558644	0.116853	-0.0846149	-0.0431667	-0.0296105	-0.097743	0.240022	0.0643446	-0.656735	-0.389033	-0.327571	-0.0581619	0.0162198	-0.328324	0.434542	-0.0404859	0.335848	-0.216571	-0.542036	-0.687793	-0.363636	-0.380195	-0.245698	-0.354446	0.0854654	-0.464226	-0.342633	0.31885
-4.53109	-0.293845	-1.05487	0.134826	-0.120033	-0.0478016	-0.160147	-0.0293779	0.423037	-0.24788	-0.174035	0.25345	-0.773482	-0.379126	0.360065	0.230507	-0.133831	-0.0823767	-0.267543	-0.0806886	-0.402346	0.128281	-0.558399	0.117664	-0.0856762	-0.0428448	-0.029128	-0.0978661	0.240156	0.0649337	-0.657524	-0.387987	-0.327171	-0.0582904	0.0150323	-0.329157	0.435182	-0.0405961	0.337469	-0.213363	-0.541306	-0.687607	-0.361853	-0.378774	-0.246194	-0.352293	0.0854068	-0.463622	-0.342514	0.31818
-4.53011	-0.292353	-1.05364	0.134984	-0.119581	-0.0466666	-0.160646	-0.0299962	0.423544	-0.247713	-0.173142	0.252832	-0.77329	-0.377363	0.360371	0.23201	-0.133633	-0.0826901	-0.267978	-0.0810823	-0.402188	0.129823	-0.558139	0.118472	-0.0867415	-0.0425202	-0.0286454	-0.0979909	0.240279	0.0655139	-0.658304	-0.386949	-0.326759	-0.0584158	0.0138477	-0.329999	0.435817	-0.0407067	0.339077	-0.210155	-0.540561	-0.687422	-0.360058	-0.377348	-0.246686	-0.35014	0.0853389	-0.463019	-0.342399	0.317516
-4.52912	-0.290869	-1.05239	0.135137	-0.119132	-0.0455362	-0.161131	-0.0306328	0.424044	-0.247558	-0.172255	0.252215	-0.773092	-0.375599	0.360675	0.233505	-0.133444	-0.0830126	-0.268407	-0.0814861	-0.40203	0.131365	-0.557864	0.119278	-0.0878106	-0.042193	-0.0281627	-0.0981174	0.24039	0.0660851	-0.659076	-0.385919	-0.326335	-0.058538	0.0126662	-0.330851	0.436447	-0.0408174	0.34067	-0.206946	-0.539803	-0.687236	-0.358251	-0.375917	-0.247173	-0.347987	0.0852618	-0.462419	-0.342289	0.316858
-4.52814	-0.289393	-1.05112	0.135285	-0.118686	-0.0444105	-0.161602	-0.0312875	0.424536	-0.247414	-0.171373	0.251599	-0.772888	-0.373834	0.360977	0.234991	-0.133263	-0.0833442	-0.268828	-0.0818999	-0.40187	0.132906	-0.557573	0.120083	-0.0888834	-0.0418631	-0.0276799	-0.0982455	0.24049	0.0666472	-0.659838	-0.384896	-0.325898	-0.058657	0.0114878	-0.331711	0.437074	-0.0409284	0.342249	-0.203738	-0.539031	-0.687051	-0.356432	-0.374481	-0.247656	-0.345834	0.0851756	-0.46182	-0.342183	0.316207
-4.52716	-0.287926	-1.04983	0.135428	-0.118242	-0.0432897	-0.162059	-0.0319604	0.425021	-0.247281	-0.170497	0.250985	-0.772677	-0.372069	0.361276	0.236467	-0.13309	-0.0836849	-0.269243	-0.0823237	-0.40171	0.134447	-0.557267	0.120886	-0.0899598	-0.0415306	-0.0271967	-0.0983753	0.240578	0.0672003	-0.660591	-0.383882	-0.325448	-0.0587727	0.0103126	-0.332581	0.437696	-0.0410396	0.343813	-0.200529	-0.538246	-0.686866	-0.354602	-0.37304	-0.248134	-0.343682	0.0850804	-0.461224	-0.342081	0.315562
-4.52617	-0.286467	-1.04852	0.135566	-0.117802	-0.042174	-0.162502	-0.0326517	0.425498	-0.24716	-0.169625	0.250371	-0.77246	-0.370303	0.361574	0.237934	-0.132925	-0.0840346	-0.26965	-0.0827572	-0.401548	0.135987	-0.556944	0.121687	-0.0910395	-0.0411956	-0.0267133	-0.0985067	0.240655	0.0677442	-0.661335	-0.382875	-0.324986	-0.0588852	0.00914079	-0.33346	0.438314	-0.0411509	0.345363	-0.197321	-0.537447	-0.686681	-0.352759	-0.371594	-0.248607	-0.341531	0.0849761	-0.460629	-0.341983	0.314925
-4.52519	-0.285017	-1.0472	0.1357	-0.117365	-0.0410635	-0.16293	-0.0333612	0.425967	-0.247051	-0.16876	0.249758	-0.772236	-0.368537	0.36187	0.239392	-0.13277	-0.0843934	-0.270051	-0.0832005	-0.401386	0.137526	-0.556606	0.122487	-0.0921226	-0.040858	-0.0262295	-0.0986399	0.24072	0.068279	-0.66207	-0.381876	-0.324512	-0.0589945	0.0079724	-0.334347	0.438928	-0.0412624	0.346899	-0.194113	-0.536634	-0.686495	-0.350905	-0.370144	-0.249076	-0.33938	0.084863	-0.460037	-0.341889	0.314294
-4.52421	-0.283577	-1.04585	0.135828	-0.11693	-0.0399583	-0.163345	-0.034089	0.426429	-0.246953	-0.167899	0.249146	-0.772007	-0.366771	0.362163	0.240841	-0.132623	-0.0847613	-0.270445	-0.0836534	-0.401222	0.139064	-0.556252	0.123286	-0.0932088	-0.040518	-0.0257453	-0.0987747	0.240774	0.0688045	-0.662796	-0.380886	-0.324025	-0.0591005	0.00680755	-0.335244	0.439537	-0.0413739	0.34842	-0.190906	-0.535808	-0.686309	-0.34904	-0.368689	-0.249541	-0.33723	0.0847409	-0.459447	-0.341799	0.31367
-4.52323	-0.282145	-1.04449	0.135952	-0.116499	-0.0388587	-0.163745	-0.0348351	0.426882	-0.246866	-0.167044	0.248536	-0.771771	-0.365004	0.362455	0.24228	-0.132485	-0.0851382	-0.270833	-0.0841158	-0.401058	0.140601	-0.555882	0.124083	-0.0942979	-0.0401755	-0.0252606	-0.0989112	0.240815	0.0693209	-0.663512	-0.379904	-0.323525	-0.0592032	0.00564634	-0.336149	0.440142	-0.0414856	0.349926	-0.187701	-0.534968	-0.686123	-0.347163	-0.367229	-0.250001	-0.33508	0.0846101	-0.458859	-0.341713	0.313053
-4.52224	-0.280723	-1.04311	0.136071	-0.11607	-0.0377648	-0.164131	-0.0355996	0.427327	-0.246791	-0.166195	0.247926	-0.77153	-0.363238	0.362744	0.243709	-0.132356	-0.0855242	-0.271213	-0.0845877	-0.400893	0.142136	-0.555496	0.124879	-0.09539	-0.0398305	-0.0247753	-0.0990495	0.240845	0.0698281	-0.664219	-0.37893	-0.323013	-0.0593027	0.00448887	-0.337064	0.440742	-0.0415972	0.351417	-0.184497	-0.534115	-0.685935	-0.345275	-0.365766	-0.250457	-0.332931	0.0844706	-0.458273	-0.341632	0.312443
-4.52126	-0.279311	-1.04171	0.136185	-0.115645	-0.0366767	-0.164503	-0.0363825	0.427764	-0.246727	-0.165352	0.247318	-0.771282	-0.361472	0.363032	0.245129	-0.132236	-0.0859192	-0.271586	-0.0850688	-0.400727	0.14367	-0.555094	0.125675	-0.0964848	-0.0394832	-0.0242893	-0.0991894	0.240863	0.070326	-0.664916	-0.377964	-0.322489	-0.0593988	0.00333524	-0.337987	0.441339	-0.0417089	0.352893	-0.181295	-0.533249	-0.685747	-0.343376	-0.364298	-0.250908	-0.330783	0.0843224	-0.457689	-0.341554	0.31184
-4.52028	-0.277908	-1.04029	0.136294	-0.115222	-0.0355947	-0.16486	-0.0371837	0.428192	-0.246675	-0.164514	0.246711	-0.771028	-0.359706	0.363317	0.246539	-0.132125	-0.0863232	-0.271952	-0.0855592	-0.400559	0.145203	-0.554675	0.126469	-0.0975822	-0.0391334	-0.0238027	-0.099331	0.240869	0.0708146	-0.665604	-0.377008	-0.321952	-0.0594916	0.00218556	-0.338919	0.44193	-0.0418205	0.354354	-0.178095	-0.532369	-0.685558	-0.341465	-0.362826	-0.251354	-0.328636	0.0841656	-0.457107	-0.341479	0.311245
-4.51929	-0.276514	-1.03885	0.136398	-0.114803	-0.0345188	-0.165203	-0.0380033	0.428612	-0.246634	-0.163682	0.246105	-0.770768	-0.357941	0.363601	0.247939	-0.132024	-0.0867362	-0.272311	-0.0860588	-0.400391	0.146733	-0.55424	0.127262	-0.098682	-0.0387814	-0.0233153	-0.0994744	0.240863	0.0712939	-0.666282	-0.37606	-0.321403	-0.0595811	0.00103991	-0.33986	0.442517	-0.041932	0.3558	-0.174897	-0.531476	-0.685369	-0.339544	-0.361351	-0.251796	-0.326491	0.0840003	-0.456528	-0.341409	0.310658
-4.51831	-0.275131	-1.03739	0.136498	-0.114387	-0.0334493	-0.165533	-0.0388414	0.429023	-0.246604	-0.162856	0.245501	-0.770502	-0.356177	0.363883	0.24933	-0.131933	-0.0871582	-0.272662	-0.0865673	-0.400222	0.148262	-0.553788	0.128055	-0.0997842	-0.038427	-0.0228271	-0.0996194	0.240846	0.0717638	-0.666949	-0.37512	-0.320841	-0.0596673	-0.000101592	-0.34081	0.4431	-0.0420435	0.357231	-0.171702	-0.53057	-0.685177	-0.337612	-0.359871	-0.252234	-0.324346	0.0838265	-0.455951	-0.341343	0.310078
-4.51733	-0.273757	-1.03592	0.136593	-0.113974	-0.0323863	-0.165848	-0.0396978	0.429425	-0.246586	-0.162036	0.244897	-0.77023	-0.354413	0.364164	0.25071	-0.131851	-0.0875892	-0.273007	-0.0870848	-0.400053	0.149789	-0.55332	0.128847	-0.100889	-0.0380703	-0.0223381	-0.0997662	0.240816	0.0722244	-0.667607	-0.37419	-0.320267	-0.0597501	-0.00123886	-0.341768	0.443678	-0.0421549	0.358646	-0.16851	-0.52965	-0.684985	-0.33567	-0.358388	-0.252667	-0.322202	0.0836444	-0.455376	-0.34128	0.309506
-4.51634	-0.272394	-1.03443	0.136683	-0.113564	-0.03133	-0.166148	-0.0405727	0.429818	-0.246578	-0.161222	0.244295	-0.769952	-0.352651	0.364442	0.252081	-0.131779	-0.0880291	-0.273344	-0.0876111	-0.399882	0.151314	-0.552835	0.129639	-0.101995	-0.0377115	-0.021848	-0.0999147	0.240774	0.0726757	-0.668255	-0.373268	-0.31968	-0.0598297	-0.0023718	-0.342735	0.444251	-0.042266	0.360045	-0.165321	-0.528718	-0.684791	-0.333716	-0.356902	-0.253096	-0.32006	0.083454	-0.454803	-0.341221	0.308942
-4.51536	-0.271041	-1.03292	0.136768	-0.113158	-0.0302804	-0.166435	-0.0414661	0.430201	-0.246583	-0.160414	0.243694	-0.769668	-0.350889	0.364719	0.253441	-0.131717	-0.088478	-0.273674	-0.088146	-0.39971	0.152836	-0.552333	0.130431	-0.103103	-0.0373503	-0.021357	-0.100065	0.24072	0.0731175	-0.668893	-0.372356	-0.319081	-0.0599058	-0.00350031	-0.343711	0.44482	-0.042377	0.361429	-0.162136	-0.527772	-0.684596	-0.331753	-0.355412	-0.25352	-0.317919	0.0832553	-0.454233	-0.341165	0.308387
-4.51438	-0.269698	-1.03139	0.136848	-0.112754	-0.0292379	-0.166707	-0.0423778	0.430576	-0.246598	-0.159613	0.243094	-0.769378	-0.349129	0.364994	0.254792	-0.131665	-0.0889357	-0.273997	-0.0886896	-0.399538	0.154357	-0.551814	0.131222	-0.104214	-0.036987	-0.0208649	-0.100217	0.240655	0.07355	-0.669521	-0.371452	-0.31847	-0.0599787	-0.00462429	-0.344695	0.445384	-0.0424878	0.362797	-0.158954	-0.526814	-0.684399	-0.329779	-0.35392	-0.25394	-0.315779	0.0830485	-0.453665	-0.341113	0.307839
-4.5134	-0.268366	-1.02984	0.136924	-0.112354	-0.0282024	-0.166966	-0.043308	0.430941	-0.246625	-0.158817	0.242496	-0.769083	-0.34737	0.365267	0.256132	-0.131624	-0.0894024	-0.274313	-0.0892417	-0.399365	0.155874	-0.551278	0.132012	-0.105326	-0.0366216	-0.0203717	-0.10037	0.240576	0.073973	-0.670138	-0.370558	-0.317847	-0.0600482	-0.00574365	-0.345688	0.445944	-0.0425983	0.364149	-0.155777	-0.525842	-0.6842	-0.327794	-0.352424	-0.254356	-0.313641	0.0828336	-0.4531	-0.341065	0.307299
-4.51241	-0.267045	-1.02828	0.136994	-0.111957	-0.0271743	-0.16721	-0.0442566	0.431296	-0.246663	-0.158028	0.241899	-0.768782	-0.345613	0.365539	0.257461	-0.131592	-0.089878	-0.274621	-0.0898021	-0.39919	0.157389	-0.550725	0.132803	-0.106439	-0.036254	-0.0198772	-0.100526	0.240486	0.0743866	-0.670745	-0.369674	-0.317211	-0.0601143	-0.00685829	-0.346689	0.446499	-0.0427085	0.365485	-0.152604	-0.524858	-0.684	-0.3258	-0.350925	-0.254767	-0.311505	0.0826107	-0.452537	-0.34102	0.306768
-4.51143	-0.265735	-1.02669	0.13706	-0.111563	-0.0261536	-0.16744	-0.0452237	0.431642	-0.246712	-0.157245	0.241303	-0.768475	-0.343858	0.365809	0.258781	-0.131571	-0.0903625	-0.274922	-0.0903708	-0.399015	0.158902	-0.550154	0.133594	-0.107554	-0.0358844	-0.0193815	-0.100683	0.240384	0.0747907	-0.671342	-0.368798	-0.316563	-0.0601771	-0.00796812	-0.347699	0.447049	-0.0428184	0.366806	-0.149435	-0.523861	-0.683797	-0.323796	-0.349424	-0.255173	-0.30937	0.0823798	-0.451976	-0.340979	0.306246
-4.51045	-0.264435	-1.02509	0.137122	-0.111173	-0.0251405	-0.167655	-0.0462092	0.431978	-0.246772	-0.156468	0.240709	-0.768162	-0.342104	0.366077	0.26009	-0.131561	-0.0908557	-0.275215	-0.0909477	-0.39884	0.160411	-0.549566	0.134385	-0.10867	-0.0355126	-0.0188845	-0.100841	0.240269	0.0751854	-0.671928	-0.367932	-0.315903	-0.0602366	-0.00907304	-0.348717	0.447594	-0.0429279	0.36811	-0.146272	-0.522851	-0.683593	-0.321782	-0.34792	-0.255575	-0.307237	0.0821411	-0.451418	-0.340941	0.305732
-4.50946	-0.263147	-1.02347	0.137178	-0.110785	-0.0241352	-0.167857	-0.0472131	0.432304	-0.246843	-0.155698	0.240116	-0.767844	-0.340353	0.366344	0.261388	-0.131562	-0.0913578	-0.275501	-0.0915326	-0.398663	0.161917	-0.548961	0.135176	-0.109787	-0.0351389	-0.0183861	-0.101002	0.240142	0.0755706	-0.672503	-0.367076	-0.315231	-0.0602928	-0.010173	-0.349743	0.448134	-0.0430371	0.369397	-0.143113	-0.521829	-0.683386	-0.319758	-0.346414	-0.255973	-0.305105	0.0818945	-0.450862	-0.340906	0.305227
-4.50848	-0.261869	-1.02184	0.13723	-0.110401	-0.0231377	-0.168045	-0.0482355	0.43262	-0.246926	-0.154934	0.239524	-0.767521	-0.338603	0.36661	0.262676	-0.131573	-0.0918687	-0.27578	-0.0921254	-0.398486	0.16342	-0.548338	0.135968	-0.110906	-0.0347631	-0.0178863	-0.101164	0.240003	0.0759463	-0.673068	-0.366229	-0.314546	-0.0603456	-0.0112678	-0.350777	0.44867	-0.0431458	0.370669	-0.13996	-0.520793	-0.683176	-0.317725	-0.344905	-0.256366	-0.302976	0.0816402	-0.450309	-0.340875	0.304731
-4.5075	-0.260603	-1.02018	0.137277	-0.11002	-0.0221483	-0.168218	-0.0492762	0.432926	-0.24702	-0.154177	0.238934	-0.767191	-0.336856	0.366874	0.263953	-0.131595	-0.0923884	-0.276051	-0.0927261	-0.398308	0.16492	-0.547698	0.13676	-0.112025	-0.0343853	-0.0173849	-0.101327	0.239852	0.0763125	-0.673622	-0.365392	-0.31385	-0.0603951	-0.0123574	-0.35182	0.449201	-0.043254	0.371924	-0.136813	-0.519746	-0.682964	-0.315682	-0.343394	-0.256755	-0.300848	0.0813783	-0.449758	-0.340847	0.304243
-4.50651	-0.259349	-1.01851	0.137319	-0.109643	-0.0211671	-0.168378	-0.0503353	0.433222	-0.247124	-0.153427	0.238345	-0.766857	-0.335112	0.367136	0.265219	-0.131628	-0.0929168	-0.276315	-0.0933345	-0.398129	0.166416	-0.54704	0.137553	-0.113145	-0.0340057	-0.016882	-0.101493	0.239688	0.0766692	-0.674165	-0.364565	-0.313141	-0.0604413	-0.0134418	-0.352871	0.449727	-0.0433617	0.373163	-0.133671	-0.518686	-0.68275	-0.31363	-0.341881	-0.25714	-0.298723	0.0811088	-0.449209	-0.340822	0.303765
-4.50553	-0.258106	-1.01683	0.137357	-0.109268	-0.0201943	-0.168523	-0.0514128	0.433507	-0.24724	-0.152683	0.237757	-0.766516	-0.33337	0.367397	0.266475	-0.131673	-0.0934539	-0.276571	-0.0939504	-0.39795	0.167909	-0.546364	0.138346	-0.114265	-0.0336241	-0.0163775	-0.10166	0.239512	0.0770164	-0.674698	-0.363748	-0.312421	-0.0604842	-0.0145208	-0.35393	0.450248	-0.0434689	0.374385	-0.130536	-0.517614	-0.682532	-0.311568	-0.340367	-0.25752	-0.2966	0.0808318	-0.448664	-0.3408	0.303296
-4.50455	-0.256875	-1.01512	0.13739	-0.108897	-0.01923	-0.168655	-0.0525087	0.433781	-0.247367	-0.151946	0.237171	-0.766171	-0.331631	0.367656	0.26772	-0.131729	-0.0939998	-0.27682	-0.0945739	-0.397769	0.169398	-0.545671	0.13914	-0.115387	-0.0332406	-0.0158713	-0.101829	0.239324	0.077354	-0.675219	-0.362941	-0.311688	-0.0605238	-0.0155944	-0.354997	0.450764	-0.0435756	0.375591	-0.127408	-0.516529	-0.682312	-0.309498	-0.33885	-0.257896	-0.294478	0.0805474	-0.44812	-0.340782	0.302836
-4.50356	-0.255656	-1.0134	0.137419	-0.108529	-0.0182743	-0.168772	-0.0536229	0.434045	-0.247505	-0.151215	0.236586	-0.76582	-0.329895	0.367915	0.268953	-0.131796	-0.0945542	-0.277061	-0.0952047	-0.397588	0.170883	-0.544959	0.139935	-0.116508	-0.0328552	-0.0153633	-0.101999	0.239123	0.0776822	-0.675729	-0.362144	-0.310944	-0.0605601	-0.0166624	-0.356072	0.451274	-0.0436816	0.37678	-0.124286	-0.515432	-0.682089	-0.307418	-0.337332	-0.258267	-0.292359	0.0802556	-0.447579	-0.340766	0.302386
-4.50258	-0.254448	-1.01166	0.137442	-0.108164	-0.0173274	-0.168876	-0.0547554	0.434298	-0.247653	-0.150491	0.236002	-0.765464	-0.328162	0.368171	0.270176	-0.131874	-0.0951173	-0.277295	-0.0958427	-0.397407	0.172365	-0.54423	0.14073	-0.11763	-0.032468	-0.0148536	-0.102171	0.23891	0.0780008	-0.676229	-0.361357	-0.310188	-0.0605931	-0.0177247	-0.357155	0.45178	-0.043787	0.377952	-0.121171	-0.514323	-0.681863	-0.30533	-0.335813	-0.258634	-0.290243	0.0799565	-0.447041	-0.340754	0.301945
-4.5016	-0.253253	-1.0099	0.137461	-0.107802	-0.0163895	-0.168966	-0.0559063	0.43454	-0.247813	-0.149775	0.23542	-0.765102	-0.326433	0.368427	0.271388	-0.131965	-0.095689	-0.277521	-0.0964879	-0.397225	0.173842	-0.543482	0.141527	-0.118752	-0.0320791	-0.014342	-0.102345	0.238684	0.0783099	-0.676717	-0.36058	-0.30942	-0.0606229	-0.0187814	-0.358245	0.452281	-0.0438917	0.379107	-0.118064	-0.513203	-0.681633	-0.303233	-0.334292	-0.258997	-0.288128	0.0796503	-0.446506	-0.340744	0.301514
-4.50062	-0.25207	-1.00813	0.137476	-0.107444	-0.0154607	-0.169042	-0.0570754	0.434771	-0.247983	-0.149064	0.234839	-0.764735	-0.324707	0.368681	0.272589	-0.132066	-0.0962693	-0.277739	-0.0971401	-0.397042	0.175315	-0.542716	0.142325	-0.119874	-0.0316883	-0.0138285	-0.10252	0.238446	0.0786094	-0.677194	-0.359814	-0.30864	-0.0606494	-0.0198322	-0.359344	0.452777	-0.0439957	0.380246	-0.114964	-0.51207	-0.6814	-0.301127	-0.332771	-0.259356	-0.286016	0.0793369	-0.445972	-0.340737	0.301093
-4.49963	-0.250899	-1.00634	0.137486	-0.107088	-0.0145411	-0.169104	-0.0582627	0.434991	-0.248165	-0.148361	0.234259	-0.764363	-0.322984	0.368933	0.273778	-0.13218	-0.0968581	-0.27795	-0.0977992	-0.396858	0.176784	-0.541932	0.143124	-0.120996	-0.0312958	-0.013313	-0.102697	0.238196	0.0788994	-0.677659	-0.359058	-0.307848	-0.0606726	-0.0208771	-0.36045	0.453268	-0.044099	0.381367	-0.111872	-0.510925	-0.681163	-0.299013	-0.331248	-0.25971	-0.283907	0.0790164	-0.445442	-0.340733	0.300681
-4.49865	-0.249741	-1.00453	0.137491	-0.106736	-0.0136309	-0.169152	-0.0594683	0.4352	-0.248357	-0.147665	0.233681	-0.763986	-0.321266	0.369185	0.274956	-0.132306	-0.0974554	-0.278153	-0.0984651	-0.396674	0.178248	-0.541129	0.143925	-0.122118	-0.0309016	-0.0127955	-0.102875	0.237933	0.0791799	-0.678114	-0.358312	-0.307045	-0.0606927	-0.0219161	-0.361564	0.453753	-0.0442014	0.382472	-0.108789	-0.509769	-0.680923	-0.29689	-0.329725	-0.260059	-0.2818	0.078689	-0.444914	-0.340732	0.30028
-4.49767	-0.248595	-1.00271	0.137492	-0.106387	-0.0127302	-0.169187	-0.060692	0.435397	-0.24856	-0.146976	0.233104	-0.763604	-0.319551	0.369435	0.276123	-0.132443	-0.0980612	-0.278349	-0.0991376	-0.39649	0.179708	-0.540309	0.144727	-0.12324	-0.0305057	-0.0122759	-0.103055	0.237658	0.0794509	-0.678556	-0.357577	-0.30623	-0.0607096	-0.022949	-0.362685	0.454233	-0.0443031	0.383559	-0.105713	-0.508601	-0.680679	-0.29476	-0.3282	-0.260405	-0.279696	0.0783547	-0.444389	-0.340734	0.299888
-4.49668	-0.247462	-1.00087	0.137488	-0.106041	-0.0118392	-0.169208	-0.0619339	0.435583	-0.248774	-0.146294	0.232528	-0.763217	-0.31784	0.369684	0.277279	-0.132593	-0.0986754	-0.278537	-0.0998167	-0.396304	0.181162	-0.539469	0.14553	-0.124361	-0.0301081	-0.0117542	-0.103237	0.237371	0.0797123	-0.678988	-0.356852	-0.305403	-0.0607232	-0.0239757	-0.363814	0.454708	-0.0444038	0.38463	-0.102647	-0.507421	-0.680431	-0.292621	-0.326676	-0.260746	-0.277594	0.0780135	-0.443867	-0.340738	0.299507
-4.4957	-0.246342	-0.999016	0.137479	-0.105698	-0.0109579	-0.169215	-0.063194	0.435757	-0.248998	-0.145619	0.231954	-0.762825	-0.316133	0.369932	0.278423	-0.132755	-0.099298	-0.278718	-0.100502	-0.396119	0.182612	-0.538611	0.146335	-0.125481	-0.0297089	-0.0112302	-0.10342	0.237071	0.0799642	-0.679407	-0.356139	-0.304565	-0.0607337	-0.0249962	-0.36495	0.455178	-0.0445037	0.385683	-0.0995893	-0.50623	-0.680179	-0.290474	-0.325151	-0.261082	-0.275496	0.0776656	-0.443347	-0.340745	0.299135
-4.49472	-0.245235	-0.997145	0.137466	-0.105359	-0.0100867	-0.169209	-0.0644721	0.43592	-0.249234	-0.144951	0.231381	-0.762428	-0.314431	0.370178	0.279556	-0.132929	-0.0999289	-0.278891	-0.101194	-0.395932	0.184058	-0.537735	0.147142	-0.126601	-0.0293081	-0.0107041	-0.103604	0.236758	0.0802066	-0.679816	-0.355435	-0.303716	-0.0607411	-0.0260103	-0.366093	0.455643	-0.0446027	0.386719	-0.096541	-0.505028	-0.679923	-0.28832	-0.323626	-0.261415	-0.2734	0.0773111	-0.44283	-0.340755	0.298775
-4.49373	-0.24414	-0.995257	0.137449	-0.105022	-0.00922545	-0.169189	-0.0657682	0.436071	-0.24948	-0.14429	0.230809	-0.762026	-0.312734	0.370424	0.280677	-0.133116	-0.100568	-0.279056	-0.101892	-0.395746	0.185498	-0.53684	0.147951	-0.127721	-0.0289058	-0.0101756	-0.10379	0.236433	0.0804394	-0.680212	-0.354743	-0.302855	-0.0607453	-0.0270181	-0.367244	0.456102	-0.0447007	0.387737	-0.0935021	-0.503814	-0.679662	-0.286158	-0.322101	-0.261743	-0.271307	0.0769499	-0.442315	-0.340766	0.298424
-4.49275	-0.243059	-0.993353	0.137427	-0.104688	-0.00837446	-0.169156	-0.0670823	0.43621	-0.249736	-0.143636	0.230239	-0.761619	-0.311041	0.370668	0.281786	-0.133315	-0.101216	-0.279214	-0.102596	-0.395558	0.186932	-0.535926	0.148762	-0.128839	-0.0285018	-0.00964484	-0.103978	0.236096	0.0806628	-0.680597	-0.354062	-0.301982	-0.0607464	-0.0280193	-0.368401	0.456555	-0.0447976	0.388739	-0.090473	-0.502589	-0.679398	-0.283988	-0.320576	-0.262067	-0.269217	0.0765823	-0.441803	-0.340781	0.298084
-4.49177	-0.241991	-0.991434	0.1374	-0.104357	-0.00753381	-0.169109	-0.0684144	0.436337	-0.250004	-0.14299	0.22967	-0.761208	-0.309353	0.370911	0.282884	-0.133526	-0.101872	-0.279364	-0.103306	-0.395371	0.188362	-0.534993	0.149574	-0.129956	-0.0280964	-0.00911164	-0.104167	0.235747	0.0808766	-0.68097	-0.353391	-0.301099	-0.0607445	-0.029014	-0.369566	0.457004	-0.0448936	0.389723	-0.0874539	-0.501354	-0.679128	-0.281811	-0.319051	-0.262386	-0.26713	0.0762082	-0.441294	-0.340797	0.297755
-4.49079	-0.240936	-0.989498	0.137369	-0.10403	-0.00670365	-0.169049	-0.0697645	0.436452	-0.250281	-0.142351	0.229102	-0.760792	-0.30767	0.371153	0.28397	-0.13375	-0.102535	-0.279506	-0.104022	-0.395183	0.189786	-0.534042	0.150389	-0.131072	-0.0276894	-0.008576	-0.104358	0.235384	0.081081	-0.681331	-0.352732	-0.300204	-0.0607395	-0.030002	-0.370738	0.457447	-0.0449884	0.390689	-0.0844451	-0.500107	-0.678854	-0.279627	-0.317527	-0.262702	-0.265046	0.0758277	-0.440788	-0.340816	0.297436
-4.4898	-0.239895	-0.987548	0.137333	-0.103705	-0.0058841	-0.168976	-0.0711323	0.436555	-0.25057	-0.141719	0.228536	-0.760371	-0.305992	0.371394	0.285045	-0.133987	-0.103208	-0.279641	-0.104743	-0.394994	0.191204	-0.533071	0.151206	-0.132187	-0.027281	-0.00803785	-0.10455	0.23501	0.0812758	-0.681681	-0.352084	-0.299298	-0.0607314	-0.0309833	-0.371917	0.457884	-0.0450822	0.391638	-0.0814468	-0.498849	-0.678575	-0.277435	-0.316004	-0.263013	-0.262965	0.075441	-0.440284	-0.340838	0.297129
-4.48882	-0.238867	-0.985581	0.137294	-0.103383	-0.0050753	-0.168889	-0.0725181	0.436645	-0.250869	-0.141094	0.22797	-0.759946	-0.30432	0.371634	0.286107	-0.134237	-0.103888	-0.279768	-0.10547	-0.394805	0.192617	-0.532082	0.152025	-0.133301	-0.0268711	-0.00749716	-0.104743	0.234623	0.0814612	-0.682018	-0.351446	-0.298381	-0.0607204	-0.0319578	-0.373103	0.458316	-0.0451747	0.39257	-0.0784593	-0.497581	-0.678291	-0.275237	-0.314481	-0.263319	-0.260888	0.075048	-0.439783	-0.340861	0.296832
-4.48784	-0.237853	-0.983599	0.137249	-0.103064	-0.00427737	-0.168789	-0.0739215	0.436724	-0.251178	-0.140477	0.227406	-0.759515	-0.302653	0.371873	0.287158	-0.134499	-0.104576	-0.279887	-0.106203	-0.394616	0.194024	-0.531074	0.152846	-0.134413	-0.0264598	-0.00695387	-0.104938	0.234224	0.0816372	-0.682344	-0.35082	-0.297453	-0.0607063	-0.0329254	-0.374295	0.458743	-0.0452661	0.393484	-0.0754828	-0.496302	-0.678003	-0.273031	-0.312959	-0.263622	-0.258813	0.074649	-0.439285	-0.340887	0.296546
-4.48685	-0.236853	-0.981602	0.1372	-0.102747	-0.00349044	-0.168676	-0.0753427	0.436789	-0.251498	-0.139867	0.226843	-0.759081	-0.300992	0.37211	0.288197	-0.134775	-0.105273	-0.279999	-0.106941	-0.394426	0.195425	-0.530046	0.15367	-0.135524	-0.0260471	-0.00640794	-0.105135	0.233812	0.0818037	-0.682657	-0.350206	-0.296514	-0.0606894	-0.033886	-0.375494	0.459164	-0.0453563	0.39438	-0.0725176	-0.495013	-0.677709	-0.270819	-0.311438	-0.26392	-0.256742	0.0742439	-0.43879	-0.340915	0.296271
-4.48587	-0.235866	-0.97959	0.137147	-0.102434	-0.00271464	-0.16855	-0.0767815	0.436842	-0.251829	-0.139264	0.226282	-0.758642	-0.299336	0.372347	0.289224	-0.135063	-0.105977	-0.280104	-0.107684	-0.394236	0.19682	-0.529	0.154497	-0.136633	-0.025633	-0.00585932	-0.105332	0.233388	0.0819607	-0.682959	-0.349602	-0.295564	-0.0606695	-0.0348396	-0.376699	0.459579	-0.0454452	0.395259	-0.069564	-0.493713	-0.677409	-0.2686	-0.309919	-0.264214	-0.254675	0.0738328	-0.438297	-0.340944	0.296008
-4.48489	-0.234893	-0.977563	0.13709	-0.102123	-0.0019501	-0.168411	-0.078238	0.436883	-0.252169	-0.138669	0.225721	-0.758199	-0.297687	0.372583	0.290239	-0.135365	-0.106689	-0.2802	-0.108432	-0.394046	0.198209	-0.527934	0.155326	-0.137741	-0.0252175	-0.00530797	-0.105531	0.232952	0.0821084	-0.683248	-0.34901	-0.294603	-0.0606467	-0.035786	-0.377911	0.459989	-0.0455328	0.39612	-0.0666221	-0.492403	-0.677105	-0.266375	-0.308401	-0.264504	-0.252611	0.0734158	-0.437807	-0.340976	0.295755
-4.4839	-0.233935	-0.975521	0.137028	-0.101815	-0.00119693	-0.168259	-0.079712	0.436911	-0.25252	-0.138081	0.225162	-0.757751	-0.296043	0.372818	0.291242	-0.135679	-0.107409	-0.280289	-0.109185	-0.393856	0.199592	-0.526849	0.156158	-0.138846	-0.0248008	-0.00475384	-0.105732	0.232503	0.0822466	-0.683525	-0.34843	-0.293631	-0.060621	-0.0367253	-0.37913	0.460393	-0.045619	0.396964	-0.0636923	-0.491083	-0.676795	-0.264143	-0.306884	-0.264789	-0.25055	0.0729931	-0.43732	-0.341009	0.295514
-4.48292	-0.23299	-0.973464	0.136961	-0.10151	-0.000455266	-0.168095	-0.0812035	0.436926	-0.252882	-0.137501	0.224603	-0.757299	-0.294406	0.373051	0.292233	-0.136007	-0.108137	-0.280371	-0.109943	-0.393665	0.200968	-0.525745	0.156992	-0.13995	-0.0243827	-0.00419688	-0.105933	0.232043	0.0823755	-0.68379	-0.34786	-0.292649	-0.0605925	-0.0376573	-0.380354	0.460791	-0.0457039	0.39779	-0.0607748	-0.489752	-0.676479	-0.261906	-0.30537	-0.26507	-0.248493	0.0725645	-0.436835	-0.341045	0.295285
-4.48194	-0.23206	-0.971393	0.136891	-0.101207	0.00027478	-0.167917	-0.0827124	0.436928	-0.253254	-0.136928	0.224046	-0.756843	-0.292776	0.373284	0.293212	-0.136349	-0.108873	-0.280445	-0.110706	-0.393474	0.202337	-0.524621	0.15783	-0.141051	-0.0239634	-0.00363707	-0.106136	0.231569	0.0824949	-0.684043	-0.347303	-0.291656	-0.0605612	-0.0385819	-0.381585	0.461184	-0.0457873	0.398598	-0.0578698	-0.488412	-0.676157	-0.259662	-0.303857	-0.265348	-0.24644	0.0721304	-0.436354	-0.341082	0.295067
-4.48095	-0.231144	-0.969307	0.136816	-0.100907	0.000993086	-0.167727	-0.0842386	0.436917	-0.253636	-0.136363	0.22349	-0.756382	-0.291152	0.373516	0.294178	-0.136703	-0.109616	-0.280511	-0.111473	-0.393283	0.203701	-0.523478	0.15867	-0.142151	-0.0235428	-0.00307434	-0.106341	0.231084	0.0826051	-0.684284	-0.346757	-0.290652	-0.0605271	-0.0394991	-0.382822	0.461571	-0.0458693	0.399389	-0.0549776	-0.487062	-0.67583	-0.257412	-0.302346	-0.26562	-0.24439	0.0716907	-0.435875	-0.341121	0.29486
-4.47997	-0.230242	-0.967207	0.136736	-0.100609	0.00169953	-0.167524	-0.0857822	0.436893	-0.254028	-0.135805	0.222935	-0.755918	-0.289535	0.373747	0.295132	-0.137071	-0.110368	-0.28057	-0.112245	-0.393091	0.205057	-0.522316	0.159514	-0.143248	-0.0231209	-0.00250867	-0.106546	0.230586	0.0827059	-0.684512	-0.346223	-0.289638	-0.0604903	-0.0404088	-0.384065	0.461952	-0.0459499	0.400162	-0.0520984	-0.485702	-0.675496	-0.255156	-0.300837	-0.265889	-0.242344	0.0712454	-0.435399	-0.341161	0.294665
-4.47899	-0.229355	-0.965092	0.136653	-0.100314	0.00239401	-0.167309	-0.0873429	0.436856	-0.25443	-0.135255	0.222381	-0.755449	-0.287925	0.373977	0.296074	-0.137453	-0.111126	-0.280621	-0.113021	-0.3929	0.206406	-0.521134	0.16036	-0.144343	-0.0226979	-0.00194001	-0.106753	0.230077	0.0827973	-0.684728	-0.3457	-0.288614	-0.0604508	-0.0413109	-0.385313	0.462327	-0.0460288	0.400917	-0.0492325	-0.484333	-0.675156	-0.252895	-0.299331	-0.266153	-0.240302	0.0707948	-0.434926	-0.341203	0.294482
-4.47801	-0.228483	-0.962963	0.136565	-0.100021	0.0030764	-0.167081	-0.0889208	0.436806	-0.254843	-0.134712	0.221828	-0.754976	-0.286321	0.374206	0.297004	-0.137847	-0.111893	-0.280665	-0.113801	-0.392708	0.207749	-0.519933	0.16121	-0.145436	-0.0222736	-0.00136833	-0.106961	0.229555	0.0828795	-0.684932	-0.345189	-0.28758	-0.0604087	-0.0422054	-0.386568	0.462696	-0.0461063	0.401654	-0.0463801	-0.482955	-0.67481	-0.250628	-0.297827	-0.266414	-0.238263	0.0703388	-0.434455	-0.341246	0.294311
-4.47702	-0.227625	-0.960821	0.136472	-0.0997308	0.00374658	-0.166841	-0.0905158	0.436743	-0.255266	-0.134176	0.221276	-0.7545	-0.284725	0.374435	0.297922	-0.138256	-0.112667	-0.280701	-0.114586	-0.392516	0.209084	-0.518712	0.162063	-0.146526	-0.0218482	-0.000793581	-0.10717	0.22902	0.0829525	-0.685123	-0.34469	-0.286535	-0.0603639	-0.0430922	-0.387828	0.46306	-0.0461821	0.402374	-0.0435415	-0.481567	-0.674458	-0.248356	-0.296327	-0.26667	-0.236229	0.0698776	-0.433988	-0.341291	0.294151
-4.47604	-0.226782	-0.958664	0.136376	-0.0994427	0.00440445	-0.166589	-0.0921278	0.436666	-0.255698	-0.133649	0.220725	-0.754019	-0.283137	0.374662	0.298827	-0.138678	-0.113448	-0.28073	-0.115374	-0.392324	0.210412	-0.517472	0.162919	-0.147613	-0.0214217	-0.000215736	-0.10738	0.228474	0.0830161	-0.685302	-0.344203	-0.28548	-0.0603165	-0.0439712	-0.389094	0.463417	-0.0462563	0.403076	-0.0407168	-0.480169	-0.674099	-0.246078	-0.294828	-0.266922	-0.234198	0.0694111	-0.433523	-0.341338	0.294004
-4.47506	-0.225953	-0.956494	0.136275	-0.0991569	0.0050499	-0.166324	-0.0937568	0.436576	-0.256141	-0.133129	0.220175	-0.753535	-0.281556	0.374889	0.299719	-0.139114	-0.114237	-0.280751	-0.116166	-0.392132	0.211733	-0.516212	0.163779	-0.148698	-0.020994	0.000365244	-0.107591	0.227916	0.0830706	-0.685468	-0.343728	-0.284415	-0.0602666	-0.0448424	-0.390365	0.463769	-0.0463288	0.40376	-0.0379064	-0.478763	-0.673733	-0.243796	-0.293333	-0.267169	-0.232172	0.0689396	-0.433061	-0.341385	0.293869
-4.47407	-0.22514	-0.954309	0.13617	-0.0988733	0.00568282	-0.166047	-0.0954026	0.436472	-0.256594	-0.132616	0.219626	-0.753047	-0.279983	0.375114	0.300599	-0.139563	-0.115033	-0.280765	-0.116962	-0.391941	0.213047	-0.514932	0.164642	-0.14978	-0.0205653	0.000949392	-0.107804	0.227346	0.0831159	-0.685622	-0.343264	-0.28334	-0.0602142	-0.0457057	-0.391641	0.464115	-0.0463996	0.404426	-0.0351104	-0.477348	-0.673361	-0.241508	-0.291841	-0.267413	-0.230149	0.0684631	-0.432601	-0.341434	0.293745
-4.47309	-0.224341	-0.952112	0.136061	-0.0985919	0.00630311	-0.165759	-0.0970651	0.436355	-0.257057	-0.132111	0.219078	-0.752555	-0.278417	0.375339	0.301467	-0.140027	-0.115837	-0.280771	-0.117762	-0.391749	0.214353	-0.513633	0.165509	-0.150859	-0.0201354	0.00153674	-0.108017	0.226763	0.0831519	-0.685763	-0.342813	-0.282255	-0.0601593	-0.0465609	-0.392923	0.464454	-0.0464686	0.405075	-0.0323292	-0.475924	-0.672982	-0.239216	-0.290353	-0.267652	-0.228131	0.0679816	-0.432145	-0.341484	0.293634
-4.47211	-0.223558	-0.949901	0.135948	-0.0983125	0.00691065	-0.165458	-0.0987444	0.436224	-0.25753	-0.131614	0.21853	-0.752059	-0.27686	0.375563	0.302322	-0.140504	-0.116647	-0.28077	-0.118565	-0.391557	0.215652	-0.512314	0.16638	-0.151935	-0.0197045	0.00212732	-0.108232	0.226169	0.0831789	-0.685892	-0.342374	-0.28116	-0.060102	-0.0474081	-0.39421	0.464788	-0.0465359	0.405705	-0.0295628	-0.474492	-0.672596	-0.236919	-0.288868	-0.267887	-0.226116	0.0674952	-0.431691	-0.341535	0.293535
-4.47112	-0.222789	-0.947677	0.13583	-0.0980352	0.00750534	-0.165146	-0.10044	0.436079	-0.258012	-0.131124	0.217984	-0.75156	-0.275311	0.375787	0.303165	-0.140995	-0.117465	-0.280761	-0.119372	-0.391365	0.216942	-0.510976	0.167254	-0.153009	-0.0192726	0.00272117	-0.108448	0.225563	0.0831967	-0.686009	-0.341947	-0.280056	-0.0600423	-0.0482472	-0.395502	0.465115	-0.0466014	0.406318	-0.0268116	-0.473051	-0.672203	-0.234617	-0.287387	-0.268118	-0.224106	0.0670041	-0.43124	-0.341587	0.293449
-4.47014	-0.222036	-0.94544	0.135709	-0.0977599	0.0080871	-0.164822	-0.102153	0.435921	-0.258505	-0.130642	0.217438	-0.751057	-0.27377	0.376009	0.303995	-0.1415	-0.11829	-0.280746	-0.120182	-0.391173	0.218225	-0.509618	0.168132	-0.154079	-0.0188396	0.00331831	-0.108664	0.224945	0.0832054	-0.686113	-0.341531	-0.278942	-0.0599802	-0.0490781	-0.396799	0.465436	-0.046665	0.406914	-0.0240758	-0.471602	-0.671802	-0.232311	-0.285909	-0.268345	-0.2221	0.0665082	-0.430792	-0.34164	0.293375
-4.46916	-0.221298	-0.943189	0.135583	-0.0974864	0.0086558	-0.164486	-0.103882	0.435749	-0.259007	-0.130167	0.216893	-0.750551	-0.272238	0.376231	0.304812	-0.142019	-0.119122	-0.280723	-0.120995	-0.390981	0.219501	-0.50824	0.169013	-0.155146	-0.0184056	0.00391878	-0.108882	0.224315	0.0832051	-0.686204	-0.341128	-0.277818	-0.0599158	-0.0499008	-0.3981	0.465751	-0.0467267	0.407491	-0.0213555	-0.470144	-0.671394	-0.23	-0.284436	-0.268568	-0.220099	0.0660078	-0.430347	-0.341694	0.293313
-4.46818	-0.220576	-0.940926	0.135453	-0.0972148	0.00921137	-0.164139	-0.105627	0.435563	-0.25952	-0.129701	0.216348	-0.750041	-0.270714	0.376452	0.305617	-0.142551	-0.119961	-0.280692	-0.121811	-0.39079	0.220768	-0.506842	0.169899	-0.156209	-0.0179707	0.00452259	-0.1091	0.223674	0.0831958	-0.686282	-0.340738	-0.276685	-0.0598492	-0.0507152	-0.399407	0.46606	-0.0467864	0.408051	-0.0186511	-0.468678	-0.670979	-0.227685	-0.282966	-0.268787	-0.218101	0.0655027	-0.429904	-0.341749	0.293264
-4.46719	-0.219868	-0.93865	0.135319	-0.096945	0.00975369	-0.16378	-0.107388	0.435363	-0.260042	-0.129241	0.215805	-0.749528	-0.269199	0.376672	0.306409	-0.143098	-0.120808	-0.280654	-0.122629	-0.390598	0.222027	-0.505425	0.170789	-0.15727	-0.0175348	0.00512978	-0.10932	0.22302	0.0831774	-0.686348	-0.340359	-0.275542	-0.0597804	-0.0515212	-0.400718	0.466363	-0.0468443	0.408593	-0.0159628	-0.467205	-0.670556	-0.225367	-0.281501	-0.269001	-0.216108	0.0649932	-0.429465	-0.341805	0.293227
-4.46621	-0.219177	-0.936362	0.13518	-0.0966769	0.0102827	-0.16341	-0.109166	0.435149	-0.260573	-0.12879	0.215262	-0.749012	-0.267693	0.376891	0.307188	-0.143659	-0.12166	-0.28061	-0.123451	-0.390407	0.223277	-0.503988	0.171682	-0.158327	-0.0170979	0.00574037	-0.10954	0.222355	0.08315	-0.686402	-0.339993	-0.274391	-0.0597094	-0.0523187	-0.402033	0.466659	-0.0469001	0.409117	-0.0132907	-0.465723	-0.670125	-0.223044	-0.280041	-0.269212	-0.21412	0.0644793	-0.429028	-0.341861	0.293203
-4.46523	-0.2185	-0.934061	0.135038	-0.0964104	0.0107983	-0.163029	-0.110959	0.434922	-0.261115	-0.128346	0.214719	-0.748492	-0.266197	0.377109	0.307954	-0.144233	-0.12252	-0.280557	-0.124275	-0.390216	0.22452	-0.502531	0.17258	-0.15938	-0.0166602	0.00635438	-0.109761	0.221679	0.0831138	-0.686443	-0.339639	-0.27323	-0.0596363	-0.0531078	-0.403353	0.46695	-0.0469539	0.409624	-0.0106351	-0.464234	-0.669687	-0.220718	-0.278585	-0.269418	-0.212136	0.0639611	-0.428593	-0.341918	0.293191
-4.46424	-0.21784	-0.931748	0.134892	-0.0961455	0.0113003	-0.162637	-0.112769	0.43468	-0.261666	-0.127909	0.214177	-0.747969	-0.264709	0.377327	0.308708	-0.144822	-0.123387	-0.280498	-0.125102	-0.390025	0.225754	-0.501054	0.173482	-0.16043	-0.0162215	0.00697183	-0.109983	0.220991	0.0830686	-0.686471	-0.339297	-0.27206	-0.0595611	-0.0538883	-0.404676	0.467233	-0.0470056	0.410113	-0.00799615	-0.462737	-0.669241	-0.218388	-0.277134	-0.26962	-0.210156	0.0634387	-0.428162	-0.341976	0.293193
-4.46326	-0.217195	-0.929423	0.134741	-0.0958821	0.0117887	-0.162233	-0.114595	0.434424	-0.262226	-0.127481	0.213636	-0.747443	-0.263231	0.377544	0.309449	-0.145425	-0.12426	-0.280432	-0.125931	-0.389835	0.226979	-0.499558	0.174388	-0.161476	-0.0157819	0.00759276	-0.110206	0.220291	0.0830145	-0.686486	-0.338968	-0.270881	-0.0594839	-0.0546602	-0.406004	0.467511	-0.0470552	0.410585	-0.00537416	-0.461233	-0.668787	-0.216054	-0.275688	-0.269818	-0.208181	0.0629121	-0.427733	-0.342033	0.293207
-4.46228	-0.216565	-0.927086	0.134587	-0.0956202	0.0122635	-0.161819	-0.116436	0.434154	-0.262796	-0.127059	0.213095	-0.746913	-0.261762	0.37776	0.310177	-0.146042	-0.12514	-0.280358	-0.126763	-0.389645	0.228196	-0.498042	0.175299	-0.162519	-0.0153414	0.00821716	-0.11043	0.21958	0.0829516	-0.686489	-0.338651	-0.269693	-0.0594047	-0.0554234	-0.407336	0.467782	-0.0471027	0.411038	-0.00276928	-0.459722	-0.668324	-0.213717	-0.274247	-0.270012	-0.206211	0.0623814	-0.427307	-0.342092	0.293234
-4.46129	-0.215952	-0.924737	0.134428	-0.0953595	0.0127245	-0.161394	-0.118293	0.43387	-0.263376	-0.126646	0.212555	-0.746381	-0.260303	0.377976	0.310892	-0.146673	-0.126026	-0.280278	-0.127597	-0.389455	0.229404	-0.496506	0.176213	-0.163558	-0.0149001	0.00884508	-0.110654	0.218857	0.0828799	-0.686479	-0.338346	-0.268496	-0.0593236	-0.0561779	-0.408672	0.468046	-0.047148	0.411474	-0.000181743	-0.458203	-0.667853	-0.211377	-0.272811	-0.270202	-0.204245	0.0618467	-0.426884	-0.342151	0.293273
-4.46031	-0.215354	-0.922376	0.134265	-0.0951002	0.0131716	-0.160959	-0.120166	0.433571	-0.263966	-0.12624	0.212015	-0.745846	-0.258854	0.378191	0.311595	-0.147319	-0.126919	-0.28019	-0.128433	-0.389265	0.230604	-0.49495	0.177132	-0.164593	-0.014458	0.00947651	-0.110879	0.218123	0.0827995	-0.686457	-0.338054	-0.267291	-0.0592406	-0.0569236	-0.410011	0.468304	-0.0471911	0.411893	0.00238825	-0.456678	-0.667374	-0.209034	-0.271381	-0.270388	-0.202283	0.0613081	-0.426464	-0.34221	0.293326
-4.45933	-0.214772	-0.920003	0.134099	-0.0948421	0.0136048	-0.160513	-0.122054	0.433259	-0.264564	-0.125842	0.211475	-0.745307	-0.257415	0.378405	0.312284	-0.147978	-0.127819	-0.280095	-0.12927	-0.389076	0.231794	-0.493374	0.178056	-0.165624	-0.014015	0.0101115	-0.111105	0.217378	0.0827103	-0.686421	-0.337775	-0.266077	-0.0591557	-0.0576605	-0.411355	0.468556	-0.0472319	0.412294	0.0049405	-0.455146	-0.666887	-0.206688	-0.269956	-0.270569	-0.200327	0.0607656	-0.426046	-0.342269	0.293392
-4.45834	-0.214206	-0.917619	0.133928	-0.0945851	0.0140239	-0.160056	-0.123957	0.432932	-0.265172	-0.125451	0.210936	-0.744766	-0.255987	0.378618	0.312961	-0.148652	-0.128725	-0.279994	-0.13011	-0.388887	0.232976	-0.491779	0.178984	-0.166652	-0.0135712	0.01075	-0.111331	0.216622	0.0826124	-0.686374	-0.337508	-0.264855	-0.0590691	-0.0583885	-0.412701	0.468801	-0.0472705	0.412678	0.0074748	-0.453607	-0.666391	-0.204339	-0.268537	-0.270747	-0.198375	0.0602194	-0.425631	-0.342328	0.293471
-4.45736	-0.213656	-0.915224	0.133753	-0.0943291	0.014429	-0.15959	-0.125876	0.43259	-0.26579	-0.125068	0.210397	-0.744222	-0.254568	0.37883	0.313624	-0.149339	-0.129637	-0.279885	-0.130951	-0.388699	0.234148	-0.490163	0.179917	-0.167675	-0.0131267	0.0113921	-0.111558	0.215854	0.0825058	-0.686313	-0.337253	-0.263624	-0.0589808	-0.0591075	-0.414051	0.46904	-0.0473068	0.413044	0.00999094	-0.452062	-0.665886	-0.201987	-0.267124	-0.27092	-0.196428	0.0596695	-0.425219	-0.342388	0.293562
-4.45638	-0.213122	-0.912817	0.133575	-0.0940742	0.0148199	-0.159113	-0.12781	0.432235	-0.266417	-0.124692	0.209858	-0.743675	-0.25316	0.379042	0.314275	-0.150041	-0.130555	-0.27977	-0.131794	-0.388511	0.235312	-0.488528	0.180854	-0.168694	-0.0126813	0.0120377	-0.111786	0.215076	0.0823906	-0.68624	-0.337011	-0.262385	-0.0588908	-0.0598176	-0.415404	0.469272	-0.0473408	0.413393	0.0124887	-0.45051	-0.665372	-0.199633	-0.265718	-0.27109	-0.194486	0.059116	-0.42481	-0.342447	0.293667
-4.4554	-0.212604	-0.910399	0.133392	-0.0938201	0.0151965	-0.158626	-0.129759	0.431864	-0.267053	-0.124324	0.20932	-0.743126	-0.251762	0.379253	0.314913	-0.150757	-0.131479	-0.279648	-0.132639	-0.388324	0.236466	-0.486873	0.181796	-0.169709	-0.0122352	0.012687	-0.112014	0.214286	0.0822669	-0.686154	-0.336782	-0.261138	-0.0587992	-0.0605186	-0.41676	0.469497	-0.0473723	0.413724	0.014968	-0.448952	-0.66485	-0.197276	-0.264317	-0.271255	-0.192548	0.0585589	-0.424403	-0.342507	0.293785
-4.45441	-0.212102	-0.907971	0.133206	-0.0935668	0.0155589	-0.158129	-0.131722	0.43148	-0.267699	-0.123964	0.208782	-0.742574	-0.250375	0.379463	0.315537	-0.151487	-0.13241	-0.279519	-0.133485	-0.388137	0.237611	-0.485199	0.182742	-0.17072	-0.0117883	0.0133398	-0.112243	0.213485	0.0821346	-0.686055	-0.336565	-0.259882	-0.058706	-0.0612105	-0.418119	0.469715	-0.0474015	0.414038	0.0174285	-0.447388	-0.664318	-0.194917	-0.262923	-0.271416	-0.190616	0.0579983	-0.423999	-0.342566	0.293916
-4.45343	-0.211617	-0.905532	0.133015	-0.0933143	0.0159068	-0.157623	-0.133701	0.431081	-0.268354	-0.123611	0.208243	-0.742019	-0.249	0.379673	0.316149	-0.152232	-0.133347	-0.279383	-0.134332	-0.387951	0.238746	-0.483504	0.183693	-0.171726	-0.0113407	0.0139962	-0.112472	0.212674	0.0819938	-0.685944	-0.336361	-0.258619	-0.0586113	-0.0618932	-0.419481	0.469927	-0.0474283	0.414335	0.01987	-0.445818	-0.663778	-0.192556	-0.261535	-0.271573	-0.188688	0.0574344	-0.423597	-0.342625	0.294061
-4.45245	-0.211147	-0.903082	0.132821	-0.0930624	0.0162403	-0.157106	-0.135694	0.430668	-0.269018	-0.123265	0.207705	-0.741462	-0.247635	0.379882	0.316748	-0.15299	-0.134289	-0.27924	-0.13518	-0.387765	0.239872	-0.48179	0.184649	-0.172729	-0.0108924	0.0146562	-0.112702	0.211852	0.0818445	-0.68582	-0.336169	-0.257348	-0.0585151	-0.0625667	-0.420845	0.470133	-0.0474525	0.414615	0.0222924	-0.444242	-0.663228	-0.190193	-0.260154	-0.271727	-0.186765	0.0568672	-0.423198	-0.342684	0.294218
-4.45146	-0.210694	-0.900621	0.132622	-0.092811	0.0165593	-0.15658	-0.137702	0.43024	-0.269691	-0.122927	0.207167	-0.740902	-0.246281	0.38009	0.317333	-0.153763	-0.135237	-0.279091	-0.136029	-0.38758	0.240989	-0.480056	0.18561	-0.173727	-0.0104433	0.0153199	-0.112932	0.211019	0.0816868	-0.685684	-0.33599	-0.256069	-0.0584176	-0.063231	-0.422212	0.470331	-0.0474743	0.414877	0.0246955	-0.442661	-0.662669	-0.187828	-0.25878	-0.271876	-0.184847	0.0562967	-0.422802	-0.342742	0.294389
-4.45048	-0.210257	-0.89815	0.13242	-0.0925602	0.0168636	-0.156045	-0.139725	0.429798	-0.270373	-0.122597	0.206629	-0.74034	-0.244938	0.380297	0.317906	-0.15455	-0.136192	-0.278936	-0.13688	-0.387395	0.242095	-0.478302	0.186576	-0.17472	-0.00999361	0.0159871	-0.113162	0.210175	0.0815208	-0.685535	-0.335824	-0.254782	-0.0583187	-0.063886	-0.423582	0.470523	-0.0474936	0.415122	0.0270792	-0.441075	-0.6621	-0.185462	-0.257413	-0.272021	-0.182935	0.0557231	-0.422409	-0.3428	0.294574
-4.4495	-0.209836	-0.895669	0.132214	-0.0923097	0.0171534	-0.155501	-0.141762	0.429341	-0.271064	-0.122274	0.206091	-0.739775	-0.243607	0.380504	0.318465	-0.155351	-0.137152	-0.278773	-0.137731	-0.387211	0.243192	-0.476529	0.187546	-0.17571	-0.00954319	0.016658	-0.113393	0.209321	0.0813464	-0.685373	-0.33567	-0.253488	-0.0582185	-0.0645316	-0.424953	0.470707	-0.0475103	0.41535	0.0294431	-0.439483	-0.661522	-0.183093	-0.256053	-0.272162	-0.181027	0.0551464	-0.422018	-0.342857	0.294771
-4.44851	-0.209431	-0.893178	0.132004	-0.0920596	0.0174284	-0.154947	-0.143813	0.428869	-0.271765	-0.121958	0.205553	-0.739208	-0.242288	0.380709	0.319012	-0.156166	-0.138117	-0.278605	-0.138583	-0.387028	0.24428	-0.474736	0.188522	-0.176694	-0.0090921	0.0173325	-0.113625	0.208456	0.0811637	-0.685198	-0.335529	-0.252186	-0.0581171	-0.0651679	-0.426327	0.470885	-0.0475244	0.415562	0.0317871	-0.437886	-0.660935	-0.180723	-0.254701	-0.272299	-0.179124	0.0545667	-0.42163	-0.342914	0.294982
-4.44753	-0.209043	-0.890677	0.13179	-0.0918096	0.0176887	-0.154385	-0.145878	0.428383	-0.272474	-0.12165	0.205015	-0.738639	-0.24098	0.380915	0.319545	-0.156995	-0.139088	-0.278429	-0.139435	-0.386846	0.245357	-0.472923	0.189502	-0.177675	-0.00864034	0.0180105	-0.113856	0.207581	0.0809728	-0.685012	-0.3354	-0.250877	-0.0580145	-0.0657947	-0.427703	0.471056	-0.0475358	0.415756	0.0341111	-0.436284	-0.660337	-0.178352	-0.253356	-0.272432	-0.177226	0.0539841	-0.421244	-0.34297	0.295207
-4.44655	-0.208671	-0.888166	0.131572	-0.0915598	0.0179341	-0.153813	-0.147957	0.427883	-0.273193	-0.121349	0.204476	-0.738068	-0.239684	0.381119	0.320065	-0.157838	-0.140065	-0.278248	-0.140288	-0.386664	0.246424	-0.471091	0.190488	-0.17865	-0.00818794	0.0186922	-0.114088	0.206696	0.0807736	-0.684812	-0.335285	-0.249561	-0.0579107	-0.066412	-0.42908	0.471221	-0.0475447	0.415933	0.0364149	-0.434677	-0.65973	-0.17598	-0.252018	-0.27256	-0.175334	0.0533986	-0.420861	-0.343026	0.295444
-4.44557	-0.208316	-0.885645	0.13135	-0.0913101	0.0181647	-0.153233	-0.15005	0.427368	-0.27392	-0.121056	0.203937	-0.737494	-0.2384	0.381322	0.320572	-0.158695	-0.141047	-0.27806	-0.141141	-0.386483	0.247482	-0.469239	0.191478	-0.179621	-0.0077349	0.0193775	-0.11432	0.2058	0.0805663	-0.6846	-0.335182	-0.248237	-0.057806	-0.0670198	-0.43046	0.471378	-0.0475509	0.416094	0.0386982	-0.433065	-0.659113	-0.173606	-0.250689	-0.272685	-0.173446	0.0528103	-0.420481	-0.343081	0.295696
-4.44458	-0.207977	-0.883115	0.131124	-0.0910603	0.0183804	-0.152645	-0.152156	0.426838	-0.274657	-0.12077	0.203398	-0.736918	-0.237128	0.381525	0.321066	-0.159566	-0.142035	-0.277866	-0.141995	-0.386303	0.248529	-0.467368	0.192474	-0.180588	-0.00728123	0.0200664	-0.114552	0.204894	0.0803509	-0.684375	-0.335092	-0.246907	-0.0577002	-0.0676181	-0.43184	0.471528	-0.0475543	0.416237	0.040961	-0.43145	-0.658486	-0.171232	-0.249367	-0.272806	-0.171564	0.0522193	-0.420103	-0.343135	0.29596
-4.4436	-0.207654	-0.880575	0.130895	-0.0908103	0.0185811	-0.152048	-0.154277	0.426294	-0.275402	-0.120491	0.202859	-0.736341	-0.235869	0.381727	0.321547	-0.160451	-0.143028	-0.277665	-0.142849	-0.386123	0.249566	-0.465477	0.193474	-0.181549	-0.00682694	0.0207588	-0.114785	0.203978	0.0801274	-0.684138	-0.335014	-0.24557	-0.0575935	-0.0682067	-0.433223	0.471671	-0.0475551	0.416364	0.043203	-0.429829	-0.657849	-0.168857	-0.248054	-0.272923	-0.169687	0.0516257	-0.419727	-0.343188	0.296239
-4.44262	-0.207348	-0.878026	0.130661	-0.0905601	0.0187667	-0.151442	-0.15641	0.425736	-0.276156	-0.12022	0.202319	-0.735761	-0.234622	0.381928	0.322015	-0.161351	-0.144026	-0.277458	-0.143702	-0.385945	0.250593	-0.463566	0.19448	-0.182506	-0.00637204	0.0214549	-0.115017	0.203052	0.0798959	-0.683889	-0.334949	-0.244226	-0.0574859	-0.0687857	-0.434606	0.471807	-0.047553	0.416475	0.0454242	-0.428205	-0.657202	-0.166481	-0.246749	-0.273036	-0.167815	0.0510295	-0.419354	-0.34324	0.29653
-4.44163	-0.207058	-0.875468	0.130424	-0.0903097	0.0189373	-0.150829	-0.158557	0.425162	-0.276919	-0.119956	0.201779	-0.73518	-0.233387	0.382129	0.322469	-0.162264	-0.145029	-0.277246	-0.144556	-0.385767	0.251609	-0.461636	0.195491	-0.183458	-0.00591655	0.0221544	-0.11525	0.202116	0.0796564	-0.683627	-0.334897	-0.242875	-0.0573775	-0.069355	-0.435991	0.471936	-0.0475482	0.416569	0.0476242	-0.426576	-0.656544	-0.164104	-0.245452	-0.273144	-0.165948	0.0504309	-0.418984	-0.343291	0.296836
-4.44065	-0.206785	-0.872901	0.130183	-0.0900588	0.0190928	-0.150207	-0.160718	0.424574	-0.27769	-0.119699	0.201238	-0.734596	-0.232165	0.382328	0.322911	-0.163191	-0.146037	-0.277027	-0.14541	-0.38559	0.252615	-0.459687	0.196507	-0.184406	-0.00546046	0.0228576	-0.115483	0.201171	0.079409	-0.683353	-0.334858	-0.241518	-0.0572683	-0.0699146	-0.437376	0.472058	-0.0475406	0.416646	0.049803	-0.424944	-0.655876	-0.161727	-0.244163	-0.273249	-0.164087	0.0498298	-0.418616	-0.34334	0.297154
-4.43967	-0.206528	-0.870326	0.129939	-0.0898074	0.0192332	-0.149578	-0.162891	0.423972	-0.278471	-0.119449	0.200697	-0.734011	-0.230956	0.382527	0.323339	-0.164131	-0.14705	-0.276802	-0.146263	-0.385415	0.253611	-0.457718	0.197528	-0.185349	-0.00500379	0.0235643	-0.115716	0.200215	0.0791537	-0.683066	-0.334831	-0.240154	-0.0571585	-0.0704645	-0.438762	0.472173	-0.0475301	0.416707	0.0519604	-0.423308	-0.655198	-0.15935	-0.242884	-0.27335	-0.162231	0.0492264	-0.418251	-0.343389	0.297487
-4.43868	-0.206288	-0.867741	0.12969	-0.0895554	0.0193583	-0.148941	-0.165077	0.423355	-0.27926	-0.119207	0.200155	-0.733424	-0.229759	0.382725	0.323754	-0.165086	-0.148068	-0.276571	-0.147117	-0.38524	0.254596	-0.45573	0.198554	-0.186286	-0.00454654	0.0242745	-0.115949	0.199251	0.0788906	-0.682767	-0.334817	-0.238784	-0.057048	-0.0710045	-0.440149	0.47228	-0.0475168	0.416752	0.0540962	-0.421669	-0.654509	-0.156973	-0.241613	-0.273446	-0.16038	0.0486207	-0.417888	-0.343436	0.297832
-4.4377	-0.206064	-0.865148	0.129437	-0.0893027	0.0194683	-0.148296	-0.167276	0.422724	-0.280057	-0.118971	0.199613	-0.732835	-0.228576	0.382922	0.324157	-0.166055	-0.149091	-0.276334	-0.147969	-0.385066	0.25557	-0.453723	0.199586	-0.187219	-0.00408873	0.0249881	-0.116182	0.198276	0.0786197	-0.682455	-0.334816	-0.237408	-0.0569369	-0.0715348	-0.441537	0.472381	-0.0475006	0.41678	0.0562103	-0.420026	-0.653809	-0.154595	-0.240351	-0.273539	-0.158535	0.0480129	-0.417527	-0.343482	0.298192
-4.43672	-0.205857	-0.862547	0.129181	-0.0890492	0.0195629	-0.147645	-0.169488	0.422078	-0.280863	-0.118743	0.19907	-0.732244	-0.227406	0.383119	0.324545	-0.167037	-0.150119	-0.276092	-0.148822	-0.384893	0.256534	-0.451696	0.200623	-0.188147	-0.00363036	0.0257053	-0.116415	0.197292	0.0783411	-0.682131	-0.334827	-0.236026	-0.0568253	-0.0720551	-0.442925	0.472474	-0.0474815	0.416792	0.0583026	-0.41838	-0.653099	-0.152218	-0.239099	-0.273628	-0.156694	0.0474029	-0.417169	-0.343527	0.298565
-4.43574	-0.205667	-0.859937	0.128921	-0.0887948	0.0196423	-0.146985	-0.171712	0.421417	-0.281678	-0.118522	0.198526	-0.731652	-0.226249	0.383314	0.324921	-0.168032	-0.151151	-0.275843	-0.149673	-0.384721	0.257487	-0.449651	0.201665	-0.18907	-0.00317144	0.0264259	-0.116647	0.196299	0.0780547	-0.681795	-0.334852	-0.234638	-0.0567133	-0.0725656	-0.444313	0.47256	-0.0474594	0.416788	0.0603728	-0.416731	-0.652378	-0.14984	-0.237855	-0.273712	-0.154859	0.0467909	-0.416814	-0.34357	0.298951
-4.43475	-0.205492	-0.857319	0.128657	-0.0885395	0.0197064	-0.146319	-0.173949	0.420742	-0.282502	-0.118308	0.197981	-0.731059	-0.225105	0.383509	0.325284	-0.169042	-0.152188	-0.275589	-0.150524	-0.384551	0.25843	-0.447586	0.202713	-0.189988	-0.00271197	0.02715	-0.11688	0.195296	0.0777608	-0.681447	-0.334889	-0.233244	-0.0566009	-0.0730661	-0.445701	0.472638	-0.0474344	0.416768	0.0624208	-0.415079	-0.651646	-0.147463	-0.236621	-0.273793	-0.15303	0.0461769	-0.41646	-0.343611	0.299351
-4.43377	-0.205335	-0.854693	0.12839	-0.0882831	0.0197551	-0.145646	-0.176198	0.420053	-0.283333	-0.118101	0.197436	-0.730464	-0.223975	0.383703	0.325633	-0.170065	-0.153229	-0.27533	-0.151374	-0.384381	0.259361	-0.445502	0.203766	-0.190902	-0.00225197	0.0278775	-0.117113	0.194285	0.0774592	-0.681087	-0.334938	-0.231844	-0.0564882	-0.0735567	-0.447089	0.47271	-0.0474063	0.416732	0.0644465	-0.413424	-0.650903	-0.145087	-0.235397	-0.273869	-0.151206	0.045561	-0.41611	-0.343651	0.299765
-4.43279	-0.205194	-0.852059	0.128118	-0.0880255	0.0197884	-0.144966	-0.178459	0.419349	-0.284174	-0.117901	0.196889	-0.729867	-0.222858	0.383896	0.32597	-0.171102	-0.154275	-0.275064	-0.152223	-0.384212	0.260282	-0.443398	0.204824	-0.19181	-0.00179143	0.0286084	-0.117345	0.193264	0.0771501	-0.680714	-0.335	-0.230438	-0.0563752	-0.0740373	-0.448477	0.472774	-0.0473753	0.416681	0.0664498	-0.411767	-0.650149	-0.142711	-0.234182	-0.273942	-0.149387	0.0449433	-0.415761	-0.343689	0.300192
-4.4318	-0.205069	-0.849418	0.127843	-0.0877667	0.0198064	-0.14428	-0.180732	0.418631	-0.285023	-0.117707	0.196342	-0.729269	-0.221756	0.384088	0.326293	-0.172152	-0.155325	-0.274793	-0.153071	-0.384045	0.261192	-0.441276	0.205887	-0.192713	-0.00133036	0.0293426	-0.117577	0.192235	0.0768335	-0.680329	-0.335075	-0.229027	-0.056262	-0.0745079	-0.449864	0.47283	-0.0473413	0.416613	0.0684304	-0.410107	-0.649384	-0.140336	-0.232978	-0.27401	-0.147574	0.0443238	-0.415415	-0.343725	0.300633
-4.43082	-0.204961	-0.846768	0.127564	-0.0875065	0.0198089	-0.143587	-0.183016	0.417898	-0.28588	-0.117521	0.195793	-0.72867	-0.220667	0.384279	0.326603	-0.173215	-0.15638	-0.274517	-0.153919	-0.383879	0.26209	-0.439135	0.206956	-0.193611	-0.000868765	0.0300801	-0.117809	0.191196	0.0765095	-0.679933	-0.335163	-0.227611	-0.0561487	-0.0749684	-0.451251	0.472879	-0.0473042	0.41653	0.0703883	-0.408446	-0.648607	-0.137961	-0.231783	-0.274075	-0.145766	0.0437026	-0.415071	-0.34376	0.301087
-4.42984	-0.20487	-0.844112	0.127282	-0.0872449	0.019796	-0.142888	-0.185313	0.417151	-0.286745	-0.117342	0.195244	-0.728069	-0.219592	0.384469	0.3269	-0.174292	-0.157438	-0.274235	-0.154764	-0.383714	0.262978	-0.436976	0.20803	-0.194504	-0.000406655	0.030821	-0.118041	0.190149	0.0761781	-0.679524	-0.335263	-0.226189	-0.0560354	-0.0754189	-0.452637	0.472921	-0.047264	0.416432	0.0723234	-0.406782	-0.64782	-0.135588	-0.230598	-0.274136	-0.143964	0.0430797	-0.414729	-0.343792	0.301555
-4.42885	-0.204794	-0.841448	0.126995	-0.0869817	0.0197676	-0.142182	-0.187621	0.416389	-0.287619	-0.117169	0.194694	-0.727467	-0.218531	0.384659	0.327184	-0.175382	-0.158501	-0.273948	-0.155609	-0.38355	0.263855	-0.434797	0.209109	-0.195393	5.5969e-05	0.0315651	-0.118272	0.189094	0.0758394	-0.679103	-0.335376	-0.224763	-0.055922	-0.0758592	-0.454022	0.472955	-0.0472208	0.416318	0.0742354	-0.405116	-0.647021	-0.133216	-0.229424	-0.274192	-0.142167	0.0424554	-0.414389	-0.343823	0.302037
-4.42787	-0.204736	-0.838777	0.126705	-0.0867168	0.0197237	-0.141471	-0.18994	0.415613	-0.288501	-0.117004	0.194142	-0.726864	-0.217484	0.384847	0.327455	-0.176485	-0.159568	-0.273656	-0.156452	-0.383388	0.26472	-0.4326	0.210194	-0.196276	0.000519104	0.0323124	-0.118503	0.188029	0.0754934	-0.67867	-0.335501	-0.223331	-0.0558087	-0.0762895	-0.455406	0.472982	-0.0471744	0.416188	0.0761242	-0.403449	-0.646211	-0.130844	-0.22826	-0.274245	-0.140375	0.0418295	-0.414052	-0.343851	0.302532
-4.42689	-0.204694	-0.836098	0.126411	-0.0864502	0.0196644	-0.140754	-0.19227	0.414823	-0.289391	-0.116845	0.193589	-0.726259	-0.216452	0.385035	0.327713	-0.177601	-0.160638	-0.273359	-0.157294	-0.383226	0.265574	-0.430384	0.211284	-0.197154	0.000982745	0.0330629	-0.118734	0.186957	0.0751402	-0.678226	-0.33564	-0.221894	-0.0556956	-0.0767096	-0.456789	0.473001	-0.0471249	0.416043	0.0779898	-0.40178	-0.645389	-0.128475	-0.227106	-0.274293	-0.138589	0.0412022	-0.413717	-0.343878	0.30304
-4.4259	-0.204668	-0.833413	0.126114	-0.0861818	0.0195895	-0.140031	-0.194612	0.414019	-0.29029	-0.116692	0.193035	-0.725654	-0.215433	0.385221	0.327958	-0.178731	-0.161713	-0.273056	-0.158134	-0.383066	0.266417	-0.428149	0.21238	-0.198027	0.00144689	0.0338166	-0.118964	0.185876	0.0747798	-0.67777	-0.33579	-0.220453	-0.0555826	-0.0771195	-0.458171	0.473012	-0.0470723	0.415884	0.079832	-0.400109	-0.644555	-0.126106	-0.225963	-0.274338	-0.136809	0.0405736	-0.413384	-0.343902	0.303562
-4.42492	-0.204659	-0.830721	0.125812	-0.0859114	0.0194992	-0.139303	-0.196964	0.4132	-0.291196	-0.116547	0.19248	-0.725048	-0.21443	0.385407	0.32819	-0.179873	-0.162791	-0.272748	-0.158973	-0.382908	0.267249	-0.425896	0.21348	-0.198895	0.00191154	0.0345734	-0.119194	0.184787	0.0744123	-0.677301	-0.335953	-0.219007	-0.0554699	-0.0775192	-0.459551	0.473016	-0.0470165	0.415709	0.0816507	-0.398438	-0.64371	-0.123739	-0.224831	-0.274378	-0.135034	0.0399437	-0.413054	-0.343924	0.304097
-4.42394	-0.204666	-0.828023	0.125507	-0.0856389	0.0193933	-0.13857	-0.199327	0.412368	-0.292111	-0.116408	0.191923	-0.72444	-0.213441	0.385591	0.328408	-0.181029	-0.163873	-0.272436	-0.15981	-0.382751	0.268069	-0.423624	0.214587	-0.199757	0.00237668	0.0353333	-0.119424	0.18369	0.0740377	-0.676822	-0.336129	-0.217556	-0.0553576	-0.0779088	-0.46093	0.473013	-0.0469575	0.415519	0.0834457	-0.396765	-0.642853	-0.121374	-0.22371	-0.274415	-0.133264	0.0393126	-0.412725	-0.343943	0.304646
-4.42296	-0.20469	-0.825317	0.125198	-0.0853643	0.0192719	-0.137831	-0.201701	0.411521	-0.293034	-0.116275	0.191365	-0.723832	-0.212467	0.385775	0.328614	-0.182197	-0.164958	-0.272118	-0.160645	-0.382595	0.268878	-0.421335	0.215698	-0.200615	0.00284232	0.0360962	-0.119653	0.182585	0.0736561	-0.67633	-0.336317	-0.216101	-0.0552456	-0.0782881	-0.462306	0.473001	-0.0468953	0.415314	0.085217	-0.395091	-0.641985	-0.11901	-0.2226	-0.274447	-0.1315	0.0386804	-0.412398	-0.34396	0.305209
-4.42197	-0.204729	-0.822606	0.124886	-0.0850875	0.019135	-0.137088	-0.204085	0.41066	-0.293965	-0.116149	0.190805	-0.723222	-0.211507	0.385958	0.328806	-0.183378	-0.166047	-0.271796	-0.161479	-0.38244	0.269675	-0.419026	0.216815	-0.201468	0.00330846	0.0368621	-0.119881	0.181472	0.0732676	-0.675827	-0.336518	-0.214642	-0.0551341	-0.0786571	-0.463681	0.472982	-0.0468299	0.415095	0.0869644	-0.393417	-0.641104	-0.116649	-0.221501	-0.274475	-0.129741	0.038047	-0.412074	-0.343975	0.305785
-4.42099	-0.204786	-0.819888	0.124569	-0.0848084	0.0189826	-0.13634	-0.20648	0.409785	-0.294904	-0.11603	0.190244	-0.722612	-0.210563	0.386139	0.328986	-0.184572	-0.16714	-0.271469	-0.16231	-0.382287	0.270461	-0.4167	0.217937	-0.202315	0.00377509	0.0376309	-0.120109	0.180352	0.0728722	-0.675312	-0.336731	-0.213178	-0.0550232	-0.0790159	-0.465053	0.472956	-0.0467613	0.414861	0.0886878	-0.391742	-0.640212	-0.114289	-0.220414	-0.2745	-0.127989	0.0374127	-0.411752	-0.343987	0.306374
-4.42001	-0.204858	-0.817164	0.124249	-0.0845268	0.0188146	-0.135587	-0.208884	0.408896	-0.295851	-0.115917	0.189681	-0.722001	-0.209633	0.38632	0.329153	-0.185778	-0.168235	-0.271137	-0.163139	-0.382136	0.271236	-0.414355	0.219065	-0.203158	0.00424221	0.0384026	-0.120336	0.179224	0.0724699	-0.674786	-0.336957	-0.211711	-0.0549128	-0.0793644	-0.466423	0.472921	-0.0466894	0.414612	0.0903871	-0.390067	-0.639308	-0.111932	-0.219338	-0.27452	-0.126241	0.0367774	-0.411431	-0.343997	0.306976
-4.41902	-0.204947	-0.814434	0.123925	-0.0842426	0.0186311	-0.13483	-0.211299	0.407993	-0.296805	-0.115811	0.189116	-0.721389	-0.208718	0.386499	0.329307	-0.186997	-0.169334	-0.2708	-0.163966	-0.381986	0.271999	-0.411993	0.220197	-0.203995	0.00470983	0.0391771	-0.120563	0.178088	0.0720608	-0.674249	-0.337195	-0.210239	-0.0548032	-0.0797026	-0.467791	0.472879	-0.0466143	0.414349	0.0920622	-0.388391	-0.638391	-0.109577	-0.218273	-0.274537	-0.124499	0.0361412	-0.411113	-0.344003	0.307592
-4.41804	-0.205052	-0.811698	0.123598	-0.0839559	0.0184321	-0.134068	-0.213723	0.407076	-0.297768	-0.11571	0.18855	-0.720777	-0.207819	0.386678	0.329447	-0.188228	-0.170437	-0.270459	-0.164792	-0.381837	0.27275	-0.409612	0.221336	-0.204828	0.00517794	0.0399545	-0.120789	0.176945	0.071645	-0.6737	-0.337445	-0.208764	-0.0546942	-0.0800304	-0.469156	0.472829	-0.0465359	0.414072	0.0937129	-0.386716	-0.637463	-0.107224	-0.217221	-0.274549	-0.122763	0.0355043	-0.410797	-0.344007	0.308222
-4.41706	-0.205173	-0.808957	0.123266	-0.0836664	0.0182176	-0.133302	-0.216157	0.406146	-0.298739	-0.115616	0.187982	-0.720163	-0.206935	0.386855	0.329575	-0.189472	-0.171542	-0.270114	-0.165614	-0.38169	0.27349	-0.407214	0.222479	-0.205655	0.00564654	0.0407346	-0.121015	0.175795	0.0712225	-0.673139	-0.337708	-0.207285	-0.0545861	-0.080348	-0.470518	0.472772	-0.0464543	0.41378	0.0953393	-0.38504	-0.636522	-0.104874	-0.21618	-0.274557	-0.121032	0.0348665	-0.410482	-0.344009	0.308864
-4.41607	-0.205311	-0.806209	0.122931	-0.0833741	0.0179876	-0.132533	-0.218601	0.405201	-0.299717	-0.115529	0.187413	-0.719549	-0.206066	0.387032	0.32969	-0.190727	-0.17265	-0.269764	-0.166435	-0.381545	0.274218	-0.404798	0.223628	-0.206477	0.00611563	0.0415173	-0.12124	0.174638	0.0707933	-0.672568	-0.337983	-0.205803	-0.0544788	-0.0806552	-0.471878	0.472706	-0.0463693	0.413475	0.0969411	-0.383365	-0.63557	-0.102526	-0.215151	-0.274562	-0.119307	0.0342281	-0.41017	-0.344007	0.30952
-4.41509	-0.205464	-0.803457	0.122593	-0.0830788	0.0177421	-0.13176	-0.221054	0.404243	-0.300703	-0.115447	0.186841	-0.718935	-0.205213	0.387207	0.329792	-0.191995	-0.173761	-0.26941	-0.167253	-0.381401	0.274934	-0.402364	0.224782	-0.207294	0.00658522	0.0423027	-0.121464	0.173474	0.0703576	-0.671985	-0.338271	-0.204317	-0.0543725	-0.080952	-0.473234	0.472633	-0.0462811	0.413156	0.0985183	-0.38169	-0.634605	-0.100181	-0.214134	-0.274562	-0.117587	0.0335891	-0.409859	-0.344002	0.310189
-4.41411	-0.205634	-0.800698	0.12225	-0.0827805	0.0174812	-0.130983	-0.223516	0.403272	-0.301697	-0.115372	0.186268	-0.71832	-0.204375	0.387381	0.329882	-0.193275	-0.174875	-0.269051	-0.168069	-0.381258	0.275639	-0.399912	0.225941	-0.208107	0.0070553	0.0430907	-0.121687	0.172302	0.0699154	-0.671392	-0.33857	-0.202828	-0.0542672	-0.0812385	-0.474587	0.472551	-0.0461895	0.412822	0.100071	-0.380016	-0.633627	-0.0978391	-0.213129	-0.274558	-0.115873	0.0329495	-0.40955	-0.343994	0.310871
-4.41313	-0.205819	-0.797935	0.121904	-0.0824791	0.0172047	-0.130203	-0.225987	0.402286	-0.302699	-0.115302	0.185692	-0.717704	-0.203553	0.387554	0.329958	-0.194567	-0.175992	-0.268688	-0.168882	-0.381118	0.276332	-0.397443	0.227105	-0.208914	0.00752589	0.0438811	-0.12191	0.171125	0.0694667	-0.670787	-0.338882	-0.201335	-0.054163	-0.0815146	-0.475936	0.472462	-0.0460946	0.412475	0.101599	-0.378342	-0.632637	-0.0954999	-0.212136	-0.274551	-0.114165	0.0323094	-0.409243	-0.343984	0.311566
-4.41214	-0.206021	-0.795167	0.121554	-0.0821745	0.0169129	-0.129419	-0.228467	0.401287	-0.303708	-0.115239	0.185115	-0.717088	-0.202747	0.387726	0.330022	-0.195871	-0.177112	-0.268322	-0.169692	-0.380979	0.277013	-0.394957	0.228275	-0.209716	0.00799697	0.044674	-0.122132	0.16994	0.0690116	-0.670171	-0.339206	-0.19984	-0.0540599	-0.0817804	-0.477282	0.472365	-0.0459963	0.412115	0.103101	-0.37667	-0.631635	-0.0931637	-0.211156	-0.274539	-0.112462	0.0316688	-0.408938	-0.34397	0.312275
-4.41116	-0.206239	-0.792393	0.1212	-0.0818666	0.0166056	-0.128633	-0.230955	0.400275	-0.304725	-0.115182	0.184536	-0.716471	-0.201956	0.387896	0.330073	-0.197186	-0.178234	-0.267951	-0.1705	-0.380841	0.277683	-0.392454	0.22945	-0.210513	0.00846855	0.0454693	-0.122353	0.168749	0.0685502	-0.669544	-0.339542	-0.198341	-0.0539581	-0.0820357	-0.478624	0.47226	-0.0458948	0.411741	0.104579	-0.374998	-0.630621	-0.0908307	-0.210189	-0.274523	-0.110764	0.0310279	-0.408635	-0.343953	0.312996
-4.41018	-0.206472	-0.789615	0.120843	-0.0815552	0.016283	-0.127844	-0.233452	0.399249	-0.305749	-0.115131	0.183954	-0.715854	-0.201181	0.388066	0.330111	-0.198513	-0.179358	-0.267576	-0.171305	-0.380706	0.27834	-0.389933	0.230629	-0.211306	0.00894064	0.0462669	-0.122573	0.167552	0.0680825	-0.668907	-0.339891	-0.19684	-0.0538575	-0.0822807	-0.479962	0.472147	-0.0457898	0.411354	0.106032	-0.373328	-0.629593	-0.088501	-0.209234	-0.274503	-0.109072	0.0303867	-0.408333	-0.343932	0.313731
-4.40919	-0.206721	-0.786832	0.120482	-0.0812404	0.015945	-0.127052	-0.235958	0.39821	-0.306781	-0.115085	0.18337	-0.715237	-0.200422	0.388234	0.330136	-0.199852	-0.180485	-0.267197	-0.172107	-0.380572	0.278986	-0.387395	0.231815	-0.212093	0.00941324	0.0470667	-0.122792	0.166349	0.0676085	-0.668259	-0.340251	-0.195336	-0.0537583	-0.0825152	-0.481295	0.472026	-0.0456816	0.410953	0.10746	-0.371659	-0.628554	-0.0861747	-0.208292	-0.274479	-0.107386	0.0297453	-0.408033	-0.343908	0.314478
-4.40821	-0.206986	-0.784044	0.120117	-0.0809219	0.0155916	-0.126257	-0.238471	0.397158	-0.30782	-0.115045	0.182784	-0.714619	-0.199679	0.388401	0.330149	-0.201202	-0.181614	-0.266815	-0.172907	-0.38044	0.27962	-0.38484	0.233005	-0.212875	0.00988635	0.0478688	-0.123011	0.165139	0.0671284	-0.6676	-0.340623	-0.19383	-0.0536604	-0.0827394	-0.482625	0.471897	-0.0455699	0.41054	0.108862	-0.369992	-0.627501	-0.0838518	-0.207362	-0.274451	-0.105705	0.0291036	-0.407735	-0.343881	0.315239
-4.40723	-0.207267	-0.781252	0.119748	-0.0805998	0.015223	-0.125461	-0.240993	0.396093	-0.308867	-0.115012	0.182196	-0.714002	-0.198952	0.388566	0.330149	-0.202563	-0.182746	-0.266428	-0.173703	-0.380309	0.280242	-0.382268	0.2342	-0.213653	0.01036	0.0486729	-0.123228	0.163924	0.0666422	-0.66693	-0.341008	-0.192321	-0.0535641	-0.0829531	-0.48395	0.471759	-0.0454549	0.410114	0.110239	-0.368326	-0.626436	-0.0815325	-0.206446	-0.274419	-0.10403	0.0284619	-0.407438	-0.34385	0.316012
-4.40624	-0.207564	-0.778455	0.119376	-0.0802738	0.014839	-0.124662	-0.243522	0.395014	-0.309922	-0.114983	0.181606	-0.713383	-0.198242	0.388731	0.330136	-0.203936	-0.183879	-0.266039	-0.174496	-0.38018	0.280852	-0.37968	0.2354	-0.214425	0.0108341	0.0494791	-0.123445	0.162702	0.0661498	-0.66625	-0.341404	-0.19081	-0.0534694	-0.0831565	-0.48527	0.471614	-0.0453366	0.409674	0.111591	-0.366662	-0.625359	-0.0792169	-0.205543	-0.274383	-0.102361	0.02782	-0.407143	-0.343816	0.316798
-4.40526	-0.207876	-0.775654	0.119	-0.079944	0.0144398	-0.123861	-0.246059	0.393922	-0.310983	-0.114961	0.181013	-0.712765	-0.197547	0.388894	0.330111	-0.205319	-0.185015	-0.265645	-0.175287	-0.380054	0.28145	-0.377074	0.236606	-0.215193	0.0113088	0.0502872	-0.123661	0.161475	0.0656515	-0.665559	-0.341812	-0.189297	-0.0533762	-0.0833494	-0.486586	0.471461	-0.0452148	0.409222	0.112917	-0.365001	-0.624268	-0.0769051	-0.204653	-0.274343	-0.100697	0.0271782	-0.40685	-0.343778	0.317597
-4.40428	-0.208203	-0.77285	0.11862	-0.0796102	0.0140254	-0.123059	-0.248604	0.392818	-0.312053	-0.114944	0.180418	-0.712146	-0.196869	0.389056	0.330073	-0.206714	-0.186153	-0.265248	-0.176074	-0.379928	0.282037	-0.374453	0.237816	-0.215956	0.011784	0.0510972	-0.123875	0.160243	0.0651473	-0.664859	-0.342232	-0.187781	-0.0532848	-0.083532	-0.487896	0.471299	-0.0450897	0.408758	0.114218	-0.363341	-0.623165	-0.0745973	-0.203776	-0.274299	-0.0990381	0.0265364	-0.406558	-0.343737	0.318408
-4.40329	-0.208546	-0.770041	0.118236	-0.0792723	0.0135958	-0.122255	-0.251156	0.3917	-0.313129	-0.114933	0.17982	-0.711528	-0.196207	0.389216	0.330023	-0.208119	-0.187292	-0.264848	-0.176858	-0.379805	0.282611	-0.371815	0.239031	-0.216714	0.0122597	0.0519091	-0.124089	0.159005	0.0646371	-0.664147	-0.342664	-0.186264	-0.0531952	-0.0837041	-0.489202	0.47113	-0.0449613	0.408281	0.115493	-0.361684	-0.622049	-0.0722934	-0.202913	-0.274251	-0.0973851	0.0258947	-0.406268	-0.343691	0.319232
-4.40231	-0.208905	-0.767228	0.117849	-0.0789303	0.0131511	-0.121449	-0.253715	0.39057	-0.314213	-0.114927	0.17922	-0.710909	-0.195561	0.389376	0.329961	-0.209535	-0.188433	-0.264444	-0.177639	-0.379684	0.283174	-0.36916	0.240251	-0.217468	0.012736	0.0527227	-0.124302	0.157761	0.0641211	-0.663426	-0.343107	-0.184745	-0.0531073	-0.0838658	-0.490502	0.470952	-0.0448294	0.407792	0.116743	-0.360029	-0.62092	-0.0699936	-0.202063	-0.274198	-0.0957377	0.0252532	-0.405979	-0.343642	0.320069
-4.40133	-0.209279	-0.764411	0.117458	-0.078584	0.0126913	-0.120643	-0.256281	0.389427	-0.315304	-0.114926	0.178617	-0.71029	-0.194932	0.389533	0.329885	-0.210962	-0.189576	-0.264037	-0.178417	-0.379564	0.283724	-0.36649	0.241477	-0.218217	0.0132128	0.0535379	-0.124513	0.156513	0.0635993	-0.662695	-0.343563	-0.183224	-0.0530214	-0.0840171	-0.491797	0.470766	-0.0446941	0.407291	0.117966	-0.358377	-0.619779	-0.0676981	-0.201226	-0.274142	-0.0940958	0.0246119	-0.405692	-0.343589	0.320918
-4.40035	-0.209668	-0.761591	0.117063	-0.0782333	0.0122165	-0.119835	-0.258854	0.388272	-0.316402	-0.114931	0.178011	-0.709671	-0.194319	0.38969	0.329798	-0.212399	-0.190721	-0.263627	-0.179191	-0.379447	0.284262	-0.363803	0.242706	-0.218961	0.0136902	0.0543547	-0.124724	0.155259	0.0630718	-0.661953	-0.344029	-0.181702	-0.0529374	-0.0841581	-0.493086	0.470572	-0.0445555	0.406778	0.119165	-0.356728	-0.618624	-0.0654069	-0.200404	-0.274081	-0.0924594	0.0239708	-0.405406	-0.343532	0.32178
-4.39936	-0.210072	-0.758767	0.116664	-0.0778782	0.0117266	-0.119027	-0.261433	0.387104	-0.317507	-0.114941	0.177403	-0.709052	-0.193723	0.389845	0.329698	-0.213846	-0.191867	-0.263214	-0.179962	-0.379331	0.284789	-0.3611	0.243941	-0.2197	0.0141682	0.055173	-0.124933	0.154001	0.0625387	-0.661202	-0.344508	-0.180178	-0.0528555	-0.0842886	-0.494369	0.470369	-0.0444135	0.406253	0.120337	-0.355081	-0.617456	-0.06312	-0.199595	-0.274017	-0.0908286	0.0233302	-0.405121	-0.343471	0.322654
-4.39838	-0.210491	-0.755939	0.116261	-0.0775186	0.0112218	-0.118218	-0.264019	0.385923	-0.318619	-0.114957	0.176792	-0.708433	-0.193144	0.389999	0.329585	-0.215303	-0.193015	-0.262797	-0.18073	-0.379217	0.285303	-0.358382	0.245181	-0.220435	0.0146467	0.0559927	-0.125141	0.152738	0.0619999	-0.66044	-0.344998	-0.178653	-0.0527757	-0.0844088	-0.495646	0.470159	-0.0442682	0.405716	0.121483	-0.353438	-0.616276	-0.0608377	-0.1988	-0.273948	-0.0892032	0.0226899	-0.404838	-0.343406	0.32354
-4.3974	-0.210926	-0.753108	0.115855	-0.0771543	0.0107021	-0.117408	-0.266612	0.384731	-0.319739	-0.114977	0.176179	-0.707814	-0.192581	0.390151	0.329461	-0.216771	-0.194164	-0.262378	-0.181494	-0.379105	0.285806	-0.355648	0.246425	-0.221165	0.0151257	0.0568137	-0.125348	0.15147	0.0614556	-0.659669	-0.345499	-0.177126	-0.0526981	-0.0845186	-0.496917	0.46994	-0.0441194	0.405168	0.122604	-0.351798	-0.615082	-0.05856	-0.198019	-0.273875	-0.0875834	0.02205	-0.404556	-0.343337	0.324439
-4.39641	-0.211375	-0.750275	0.115445	-0.0767854	0.0101675	-0.116599	-0.26921	0.383526	-0.320865	-0.115003	0.175562	-0.707196	-0.192034	0.390302	0.329324	-0.218248	-0.195314	-0.261956	-0.182254	-0.378996	0.286296	-0.352898	0.247674	-0.22189	0.0156054	0.057636	-0.125554	0.150198	0.0609058	-0.658889	-0.346012	-0.175599	-0.0526227	-0.084618	-0.498182	0.469713	-0.0439674	0.404608	0.123698	-0.350162	-0.613876	-0.0562871	-0.197252	-0.273799	-0.0859691	0.0214107	-0.404275	-0.343264	0.32535
-4.39543	-0.211839	-0.747437	0.115031	-0.0764116	0.00961809	-0.115789	-0.271814	0.382308	-0.321998	-0.115034	0.174943	-0.706577	-0.191505	0.390451	0.329175	-0.219735	-0.196465	-0.261531	-0.183011	-0.378888	0.286775	-0.350133	0.248927	-0.222611	0.0160857	0.0584594	-0.125759	0.148921	0.0603506	-0.658098	-0.346536	-0.174071	-0.0525496	-0.0847071	-0.499441	0.469477	-0.0438119	0.404037	0.124767	-0.348529	-0.612656	-0.0540189	-0.196499	-0.273718	-0.0843602	0.0207719	-0.403996	-0.343186	0.326273
-4.39445	-0.212318	-0.744597	0.114614	-0.076033	0.00905395	-0.114979	-0.274424	0.381079	-0.323139	-0.11507	0.174321	-0.705958	-0.190992	0.390599	0.329013	-0.221232	-0.197618	-0.261103	-0.183764	-0.378782	0.287241	-0.347353	0.250185	-0.223328	0.0165665	0.0592838	-0.125963	0.147641	0.05979	-0.657298	-0.347072	-0.172542	-0.0524789	-0.0847858	-0.500692	0.469233	-0.0436531	0.403455	0.125809	-0.3469	-0.611423	-0.0517556	-0.195761	-0.273633	-0.0827568	0.0201337	-0.403718	-0.343104	0.327208
-4.39346	-0.212812	-0.741754	0.114192	-0.0756494	0.00847512	-0.11417	-0.27704	0.379838	-0.324286	-0.11511	0.173696	-0.70534	-0.190496	0.390745	0.32884	-0.222739	-0.198771	-0.260673	-0.184514	-0.378678	0.287696	-0.344557	0.251448	-0.22404	0.017048	0.0601093	-0.126165	0.146356	0.0592241	-0.656489	-0.347618	-0.171012	-0.0524107	-0.0848542	-0.501937	0.468981	-0.0434909	0.402862	0.126826	-0.345275	-0.610178	-0.0494973	-0.195036	-0.273543	-0.0811589	0.0194962	-0.403441	-0.343018	0.328155
-4.39248	-0.213321	-0.738909	0.113767	-0.0752608	0.00788166	-0.113361	-0.279661	0.378585	-0.32544	-0.115156	0.173068	-0.704722	-0.190017	0.39089	0.328654	-0.224254	-0.199926	-0.26024	-0.18526	-0.378576	0.288138	-0.341747	0.252715	-0.224748	0.01753	0.0609355	-0.126367	0.145067	0.058653	-0.655671	-0.348176	-0.169481	-0.052345	-0.0849123	-0.503175	0.46872	-0.0433254	0.402258	0.127816	-0.343654	-0.608919	-0.0472442	-0.194326	-0.27345	-0.0795665	0.0188594	-0.403165	-0.342927	0.329114
-4.3915	-0.213843	-0.73606	0.113338	-0.074867	0.00727363	-0.112552	-0.282288	0.37732	-0.326601	-0.115206	0.172436	-0.704104	-0.189555	0.391033	0.328457	-0.225779	-0.201081	-0.259805	-0.186002	-0.378477	0.288569	-0.338921	0.253987	-0.225452	0.0180127	0.0617626	-0.126566	0.143775	0.0580766	-0.654843	-0.348745	-0.16795	-0.0522819	-0.0849601	-0.504405	0.468451	-0.0431566	0.401644	0.12878	-0.342036	-0.607647	-0.0449962	-0.193631	-0.273353	-0.0779795	0.0182234	-0.40289	-0.342832	0.330084
-4.39052	-0.214381	-0.733209	0.112905	-0.074468	0.00665109	-0.111745	-0.284919	0.376044	-0.327769	-0.115262	0.171802	-0.703486	-0.18911	0.391175	0.328247	-0.227313	-0.202237	-0.259367	-0.186741	-0.378379	0.288987	-0.336081	0.255263	-0.226151	0.0184961	0.0625903	-0.126765	0.142478	0.0574951	-0.654006	-0.349326	-0.166419	-0.0522214	-0.0849976	-0.505629	0.468174	-0.0429844	0.401019	0.129718	-0.340424	-0.606361	-0.0427534	-0.19295	-0.273251	-0.0763979	0.0175882	-0.402617	-0.342733	0.331067
-4.38953	-0.214932	-0.730356	0.112468	-0.0740637	0.00601411	-0.110939	-0.287555	0.374756	-0.328943	-0.115321	0.171165	-0.702869	-0.188682	0.391315	0.328026	-0.228856	-0.203394	-0.258927	-0.187476	-0.378283	0.289394	-0.333227	0.256543	-0.226846	0.0189801	0.0634186	-0.126963	0.141179	0.0569085	-0.65316	-0.349917	-0.164888	-0.0521636	-0.0850248	-0.506845	0.467888	-0.042809	0.400383	0.13063	-0.338816	-0.605063	-0.0405161	-0.192284	-0.273145	-0.0748218	0.0169539	-0.402344	-0.342628	0.332061
-4.38855	-0.215498	-0.7275	0.112028	-0.0736541	0.00536275	-0.110134	-0.290196	0.373457	-0.330124	-0.115386	0.170524	-0.702252	-0.18827	0.391454	0.327792	-0.230408	-0.204551	-0.258485	-0.188207	-0.37819	0.289789	-0.330357	0.257828	-0.227536	0.0194647	0.0642474	-0.127159	0.139876	0.0563169	-0.652305	-0.350519	-0.163356	-0.0521087	-0.0850418	-0.508053	0.467594	-0.0426302	0.399738	0.131515	-0.337212	-0.603752	-0.0382842	-0.191633	-0.273035	-0.0732511	0.0163204	-0.402073	-0.34252	0.333066
-4.38757	-0.216078	-0.724642	0.111583	-0.0732389	0.00469709	-0.10933	-0.292842	0.372146	-0.331312	-0.115455	0.16988	-0.701635	-0.187876	0.391591	0.327547	-0.231968	-0.205709	-0.258041	-0.188934	-0.378098	0.290171	-0.327474	0.259117	-0.228223	0.01995	0.0650765	-0.127354	0.13857	0.0557203	-0.651441	-0.351131	-0.161825	-0.0520565	-0.0850486	-0.509253	0.467292	-0.0424481	0.399082	0.132375	-0.335613	-0.602427	-0.0360578	-0.190996	-0.272921	-0.0716858	0.015688	-0.401802	-0.342406	0.334083
-4.38658	-0.216672	-0.721781	0.111135	-0.0728183	0.00401719	-0.108528	-0.295492	0.370824	-0.332506	-0.115529	0.169233	-0.701019	-0.187499	0.391726	0.32729	-0.233537	-0.206867	-0.257594	-0.189657	-0.378009	0.290542	-0.324576	0.26041	-0.228905	0.020436	0.0659059	-0.127547	0.13726	0.0551188	-0.650569	-0.351755	-0.160293	-0.0520074	-0.0850451	-0.510445	0.46698	-0.0422628	0.398416	0.133208	-0.334019	-0.601089	-0.0338371	-0.190374	-0.272803	-0.0701258	0.0150566	-0.401533	-0.342288	0.335112
-4.3856	-0.21728	-0.718919	0.110683	-0.072392	0.00332313	-0.107728	-0.298146	0.369492	-0.333707	-0.115607	0.168583	-0.700403	-0.187138	0.39186	0.327021	-0.235114	-0.208025	-0.257146	-0.190376	-0.377922	0.290901	-0.321665	0.261707	-0.229584	0.0209227	0.0667355	-0.127739	0.135948	0.0545124	-0.649688	-0.352389	-0.158762	-0.0519612	-0.0850315	-0.51163	0.466661	-0.0420742	0.397741	0.134014	-0.33243	-0.599738	-0.0316221	-0.189768	-0.272681	-0.0685713	0.0144262	-0.401264	-0.342164	0.336151
-4.38462	-0.217902	-0.716055	0.110227	-0.07196	0.00261498	-0.106929	-0.300804	0.368148	-0.334915	-0.115689	0.167929	-0.699787	-0.186795	0.391992	0.32674	-0.236699	-0.209184	-0.256696	-0.191091	-0.377837	0.291248	-0.318739	0.263008	-0.230258	0.02141	0.0675652	-0.12793	0.134633	0.0539013	-0.648798	-0.353034	-0.157232	-0.051918	-0.0850077	-0.512806	0.466333	-0.0418823	0.397056	0.134795	-0.330847	-0.598374	-0.0294129	-0.189176	-0.272554	-0.067022	0.013797	-0.400996	-0.342036	0.337202
-4.38363	-0.218538	-0.713188	0.109767	-0.0715223	0.00189282	-0.106133	-0.303466	0.366793	-0.336128	-0.115776	0.167272	-0.699172	-0.186469	0.392122	0.326448	-0.238292	-0.210343	-0.256243	-0.191802	-0.377754	0.291583	-0.3158	0.264314	-0.230929	0.0218981	0.0683948	-0.12812	0.133316	0.0532854	-0.6479	-0.35369	-0.155701	-0.051878	-0.0849737	-0.513973	0.465996	-0.0416872	0.396361	0.135549	-0.329268	-0.596996	-0.0272096	-0.188599	-0.272423	-0.0654782	0.0131689	-0.400729	-0.341903	0.338264
-4.38265	-0.219187	-0.71032	0.109303	-0.0710787	0.00115672	-0.105339	-0.306131	0.365428	-0.337349	-0.115867	0.166611	-0.698557	-0.18616	0.392251	0.326144	-0.239893	-0.211502	-0.255789	-0.19251	-0.377674	0.291906	-0.312848	0.265623	-0.231596	0.0223869	0.0692242	-0.128308	0.131996	0.0526648	-0.646994	-0.354356	-0.154172	-0.0518412	-0.0849297	-0.515132	0.465651	-0.0414889	0.395657	0.136276	-0.327695	-0.595605	-0.0250123	-0.188037	-0.272288	-0.0639397	0.0125421	-0.400463	-0.341766	0.339337
-4.38167	-0.21985	-0.707451	0.108836	-0.0706292	0.000406771	-0.104548	-0.3088	0.364051	-0.338575	-0.115962	0.165947	-0.697943	-0.185868	0.392378	0.325829	-0.241502	-0.212661	-0.255334	-0.193213	-0.377595	0.292217	-0.309881	0.266936	-0.232258	0.0228764	0.0700534	-0.128494	0.130674	0.0520396	-0.64608	-0.355033	-0.152643	-0.0518076	-0.0848755	-0.516281	0.465297	-0.0412874	0.394944	0.136978	-0.326128	-0.594201	-0.0228211	-0.187491	-0.272149	-0.0624065	0.0119165	-0.400197	-0.341623	0.340421
-4.38068	-0.220526	-0.704579	0.108364	-0.0701737	-0.000356951	-0.10376	-0.311473	0.362665	-0.339809	-0.116061	0.16528	-0.697329	-0.185593	0.392503	0.325502	-0.243118	-0.21382	-0.254876	-0.193912	-0.377519	0.292517	-0.306902	0.268253	-0.232918	0.0233667	0.0708822	-0.12868	0.129349	0.0514098	-0.645157	-0.355719	-0.151115	-0.0517774	-0.0848113	-0.517422	0.464935	-0.0410827	0.394222	0.137653	-0.324567	-0.592784	-0.020636	-0.18696	-0.272005	-0.0608785	0.0112922	-0.399932	-0.341475	0.341516
-4.3797	-0.221215	-0.701707	0.107889	-0.0697121	-0.00113436	-0.102974	-0.314148	0.361268	-0.341048	-0.116164	0.164609	-0.696715	-0.185335	0.392626	0.325163	-0.244742	-0.214979	-0.254418	-0.194607	-0.377445	0.292804	-0.30391	0.269574	-0.233573	0.0238578	0.0717105	-0.128864	0.128022	0.0507756	-0.644226	-0.356417	-0.149588	-0.0517505	-0.0847371	-0.518554	0.464564	-0.0408748	0.393491	0.138301	-0.323011	-0.591354	-0.0184571	-0.186444	-0.271858	-0.0593559	0.0106692	-0.399668	-0.341321	0.342621
-4.37872	-0.221918	-0.698833	0.10741	-0.0692445	-0.00192538	-0.102192	-0.316826	0.359861	-0.342293	-0.116272	0.163934	-0.696102	-0.185094	0.392748	0.324813	-0.246373	-0.216137	-0.253957	-0.195298	-0.377373	0.29308	-0.300904	0.270898	-0.234225	0.0243496	0.0725383	-0.129046	0.126694	0.0501368	-0.643288	-0.357124	-0.148062	-0.0517271	-0.0846528	-0.519677	0.464185	-0.0406638	0.392752	0.138924	-0.321461	-0.58991	-0.0162846	-0.185944	-0.271706	-0.0578386	0.0100477	-0.399405	-0.341163	0.343737
-4.37774	-0.222633	-0.695957	0.106926	-0.0687706	-0.00272991	-0.101413	-0.319508	0.358443	-0.343545	-0.116383	0.163256	-0.69549	-0.184871	0.392868	0.324452	-0.24801	-0.217295	-0.253496	-0.195985	-0.377304	0.293344	-0.297886	0.272226	-0.234873	0.0248422	0.0733653	-0.129227	0.125364	0.0494937	-0.642341	-0.357841	-0.146538	-0.0517072	-0.0845586	-0.52079	0.463797	-0.0404497	0.392004	0.13952	-0.319918	-0.588454	-0.0141184	-0.185459	-0.27155	-0.0563265	0.0094276	-0.399142	-0.340999	0.344864
-4.37675	-0.223362	-0.69308	0.106439	-0.0682905	-0.00354787	-0.100637	-0.322191	0.357016	-0.344803	-0.116498	0.162574	-0.694878	-0.184664	0.392986	0.32408	-0.249655	-0.218453	-0.253033	-0.196667	-0.377236	0.293596	-0.294856	0.273558	-0.235517	0.0253356	0.0741914	-0.129407	0.124032	0.0488462	-0.641387	-0.358569	-0.145015	-0.0516909	-0.0844544	-0.521893	0.463401	-0.0402324	0.391247	0.140089	-0.318381	-0.586984	-0.0119587	-0.18499	-0.271389	-0.0548196	0.00880898	-0.398879	-0.34083	0.346001
-4.37577	-0.224103	-0.690202	0.105948	-0.0678041	-0.00437916	-0.0998655	-0.324877	0.355579	-0.346067	-0.116617	0.161888	-0.694267	-0.184475	0.393102	0.323696	-0.251306	-0.21961	-0.252569	-0.197346	-0.377171	0.293837	-0.291813	0.274893	-0.236159	0.0258298	0.0750166	-0.129585	0.122699	0.0481945	-0.640426	-0.359306	-0.143493	-0.0516782	-0.0843403	-0.522986	0.462996	-0.0400121	0.390483	0.140633	-0.31685	-0.585501	-0.00980559	-0.184536	-0.271225	-0.053318	0.0081919	-0.398618	-0.340656	0.347148
-4.37479	-0.224857	-0.687324	0.105453	-0.0673112	-0.0052237	-0.0990974	-0.327566	0.354132	-0.347337	-0.116739	0.161198	-0.693656	-0.184303	0.393217	0.323301	-0.252964	-0.220767	-0.252103	-0.19802	-0.377108	0.294066	-0.288758	0.276232	-0.236796	0.0263249	0.0758408	-0.129762	0.121364	0.0475385	-0.639456	-0.360054	-0.141972	-0.0516693	-0.0842164	-0.52407	0.462582	-0.0397887	0.38971	0.14115	-0.315326	-0.584004	-0.00765908	-0.184098	-0.271056	-0.0518215	0.00757638	-0.398356	-0.340477	0.348306
-4.3738	-0.225624	-0.684444	0.104954	-0.0668119	-0.00608139	-0.0983334	-0.330256	0.352675	-0.348614	-0.116865	0.160505	-0.693046	-0.184148	0.393329	0.322895	-0.254629	-0.221922	-0.251637	-0.19869	-0.377048	0.294283	-0.28569	0.277574	-0.237431	0.0268208	0.0766638	-0.129938	0.120028	0.0468784	-0.63848	-0.360811	-0.140454	-0.0516641	-0.0840826	-0.525143	0.462159	-0.0395623	0.38893	0.14164	-0.313808	-0.582495	-0.00551927	-0.183675	-0.270882	-0.0503303	0.00696248	-0.398096	-0.340292	0.349473
-4.37282	-0.226403	-0.681563	0.104451	-0.0663062	-0.00695213	-0.0975737	-0.332948	0.351209	-0.349896	-0.116995	0.159808	-0.692436	-0.184009	0.39344	0.322478	-0.256299	-0.223077	-0.25117	-0.199356	-0.37699	0.294489	-0.282611	0.278919	-0.238062	0.0273175	0.0774854	-0.130112	0.118691	0.0462141	-0.637496	-0.361577	-0.138937	-0.0516628	-0.083939	-0.526207	0.461728	-0.0393329	0.388141	0.142105	-0.312298	-0.580972	-0.00338623	-0.183268	-0.270705	-0.0488442	0.00635023	-0.397835	-0.340101	0.350651
-4.37184	-0.227195	-0.678681	0.103944	-0.0657938	-0.00783583	-0.0968183	-0.335642	0.349733	-0.351184	-0.117129	0.159108	-0.691827	-0.183888	0.393549	0.32205	-0.257975	-0.224232	-0.250701	-0.200018	-0.376934	0.294683	-0.27952	0.280267	-0.23869	0.0278151	0.0783056	-0.130284	0.117354	0.0455458	-0.636505	-0.362354	-0.137422	-0.0516653	-0.0837856	-0.527259	0.461289	-0.0391005	0.387345	0.142543	-0.310794	-0.579437	-0.00126005	-0.182877	-0.270523	-0.0473633	0.00573968	-0.397575	-0.339905	0.351838
-4.37085	-0.227998	-0.675799	0.103433	-0.0652748	-0.00873239	-0.0960676	-0.338338	0.348249	-0.352478	-0.117266	0.158403	-0.691219	-0.183784	0.393656	0.321611	-0.259658	-0.225385	-0.250232	-0.200675	-0.37688	0.294866	-0.276418	0.281619	-0.239315	0.0283136	0.0791243	-0.130455	0.116015	0.0448735	-0.635508	-0.36314	-0.135909	-0.0516719	-0.0836225	-0.528301	0.46084	-0.0388652	0.386542	0.142955	-0.309297	-0.577888	0.00085921	-0.182502	-0.270337	-0.0458875	0.00513086	-0.397315	-0.339703	0.353035
-4.36987	-0.228814	-0.672916	0.102919	-0.0647492	-0.0096417	-0.0953216	-0.341035	0.346755	-0.353777	-0.117406	0.157694	-0.690611	-0.183697	0.393761	0.321162	-0.261346	-0.226537	-0.249762	-0.201328	-0.376829	0.295037	-0.273304	0.282974	-0.239936	0.0288131	0.0799413	-0.130625	0.114676	0.0441972	-0.634503	-0.363935	-0.134399	-0.0516824	-0.0834498	-0.529333	0.460383	-0.0386269	0.385732	0.14334	-0.307807	-0.576326	0.00297147	-0.182142	-0.270146	-0.0444168	0.00452383	-0.397056	-0.339496	0.354242
-4.36889	-0.229641	-0.670033	0.1024	-0.0642168	-0.0105637	-0.0945807	-0.343732	0.345252	-0.355083	-0.117549	0.156982	-0.690004	-0.183627	0.393864	0.320701	-0.263039	-0.227689	-0.249292	-0.201977	-0.37678	0.295197	-0.270179	0.284332	-0.240555	0.0293134	0.0807565	-0.130793	0.113337	0.0435171	-0.633491	-0.36474	-0.13289	-0.0516971	-0.0832673	-0.530353	0.459918	-0.0383857	0.384914	0.1437	-0.306325	-0.574751	0.00507666	-0.181798	-0.269951	-0.0429513	0.0039186	-0.396797	-0.339283	0.355458
-4.36791	-0.230481	-0.667149	0.101877	-0.0636776	-0.0114982	-0.0938448	-0.346431	0.343741	-0.356394	-0.117696	0.156265	-0.689397	-0.183574	0.393965	0.32023	-0.264738	-0.228839	-0.248821	-0.202622	-0.376733	0.295345	-0.267042	0.285692	-0.241171	0.0298147	0.0815697	-0.13096	0.111997	0.0428331	-0.632473	-0.365554	-0.131384	-0.0517159	-0.0830753	-0.531363	0.459443	-0.0381417	0.384089	0.144033	-0.30485	-0.573163	0.0071747	-0.181471	-0.269752	-0.0414908	0.00331524	-0.396538	-0.339064	0.356684
-4.36692	-0.231332	-0.664265	0.10135	-0.0631316	-0.0124452	-0.0931143	-0.349131	0.34222	-0.357711	-0.117847	0.155545	-0.688791	-0.183538	0.394065	0.319748	-0.266442	-0.229987	-0.248349	-0.203262	-0.376688	0.295482	-0.263895	0.287056	-0.241784	0.0303169	0.0823809	-0.131125	0.110657	0.0421453	-0.631448	-0.366378	-0.12988	-0.0517389	-0.0828737	-0.532361	0.45896	-0.0378948	0.383258	0.14434	-0.303383	-0.571562	0.00926554	-0.181159	-0.269549	-0.0400353	0.00271376	-0.396279	-0.33884	0.357919
-4.36594	-0.232194	-0.66138	0.100819	-0.0625787	-0.0134045	-0.0923894	-0.351831	0.340692	-0.359033	-0.118	0.154821	-0.688186	-0.183519	0.394162	0.319255	-0.26815	-0.231135	-0.247877	-0.203899	-0.376646	0.295607	-0.260738	0.288422	-0.242394	0.03082	0.0831899	-0.131289	0.109317	0.0414538	-0.630417	-0.36721	-0.128379	-0.0517662	-0.0826626	-0.533348	0.458468	-0.0376451	0.38242	0.144621	-0.301923	-0.569948	0.0113491	-0.180863	-0.269341	-0.0385849	0.00211422	-0.39602	-0.33861	0.359163
-4.36496	-0.233068	-0.658495	0.100284	-0.0620188	-0.014376	-0.0916701	-0.354532	0.339155	-0.360362	-0.118156	0.154092	-0.687581	-0.183517	0.394257	0.318752	-0.269864	-0.232281	-0.247404	-0.204531	-0.376607	0.295721	-0.25757	0.289792	-0.243002	0.0313242	0.0839966	-0.131451	0.107978	0.0407587	-0.629379	-0.368051	-0.126881	-0.0517978	-0.082442	-0.534323	0.457968	-0.0373926	0.381576	0.144876	-0.300471	-0.568321	0.0134253	-0.180583	-0.269129	-0.0371396	0.00151665	-0.395762	-0.338374	0.360416
-4.36397	-0.233953	-0.65561	0.0997453	-0.061452	-0.0153597	-0.0909567	-0.357233	0.337609	-0.361695	-0.118316	0.15336	-0.686977	-0.183531	0.394351	0.318238	-0.271582	-0.233426	-0.246931	-0.205158	-0.376569	0.295824	-0.254391	0.291163	-0.243607	0.0318294	0.0848008	-0.131612	0.106638	0.0400599	-0.628335	-0.368902	-0.125385	-0.0518338	-0.0822119	-0.535287	0.457459	-0.0371374	0.380725	0.145105	-0.299027	-0.566681	0.0154941	-0.18032	-0.268912	-0.0356992	0.000921077	-0.395503	-0.338132	0.361678
-4.36299	-0.23485	-0.652725	0.0992023	-0.0608781	-0.0163553	-0.0902493	-0.359935	0.336056	-0.363034	-0.118478	0.152623	-0.686374	-0.183563	0.394442	0.317714	-0.273305	-0.234569	-0.246458	-0.205782	-0.376534	0.295916	-0.251203	0.292538	-0.244209	0.0323355	0.0856025	-0.131772	0.105299	0.0393576	-0.627285	-0.369761	-0.123893	-0.0518743	-0.0819725	-0.536238	0.456941	-0.0368795	0.379869	0.145308	-0.297591	-0.565028	0.0175554	-0.180072	-0.268691	-0.0342638	0.000327547	-0.395245	-0.337884	0.362948
-4.36201	-0.235757	-0.64984	0.0986552	-0.0602972	-0.0173629	-0.0895482	-0.362636	0.334494	-0.364379	-0.118643	0.151882	-0.685771	-0.183611	0.394531	0.31718	-0.275031	-0.23571	-0.245985	-0.206401	-0.376501	0.295997	-0.248005	0.293914	-0.244809	0.0328428	0.0864014	-0.13193	0.103961	0.0386518	-0.62623	-0.370629	-0.122403	-0.0519193	-0.0817238	-0.537178	0.456414	-0.0366189	0.379006	0.145485	-0.296163	-0.563363	0.0196092	-0.17984	-0.268465	-0.0328334	-0.000263906	-0.394986	-0.33763	0.364228
-4.36102	-0.236675	-0.646955	0.0981041	-0.0597092	-0.0183822	-0.0888535	-0.365337	0.332925	-0.365729	-0.118811	0.151138	-0.685169	-0.183676	0.394619	0.316635	-0.276762	-0.23685	-0.245511	-0.207016	-0.376471	0.296066	-0.244796	0.295294	-0.245406	0.033351	0.0871975	-0.132086	0.102624	0.0379425	-0.625168	-0.371505	-0.120916	-0.0519688	-0.0814658	-0.538106	0.455879	-0.0363557	0.378138	0.145636	-0.294743	-0.561684	0.0216553	-0.179625	-0.268236	-0.0314079	-0.000853249	-0.394728	-0.33737	0.365516
-4.36004	-0.237603	-0.644069	0.097549	-0.059114	-0.0194132	-0.0881654	-0.368037	0.331348	-0.367084	-0.118982	0.150389	-0.684568	-0.183757	0.394704	0.316081	-0.278497	-0.237987	-0.245037	-0.207627	-0.376443	0.296125	-0.241579	0.296675	-0.246001	0.0338603	0.0879906	-0.132242	0.101287	0.0372298	-0.6241	-0.37239	-0.119433	-0.052023	-0.0811985	-0.539021	0.455335	-0.0360899	0.377264	0.145762	-0.293332	-0.559993	0.0236938	-0.179426	-0.268001	-0.0299874	-0.00144045	-0.394469	-0.337104	0.366812
-4.35906	-0.238543	-0.641185	0.0969897	-0.0585117	-0.0204558	-0.0874841	-0.370737	0.329763	-0.368444	-0.119156	0.149635	-0.683967	-0.183855	0.394787	0.315516	-0.280235	-0.239123	-0.244564	-0.208233	-0.376417	0.296172	-0.238352	0.298059	-0.246594	0.0343707	0.0887806	-0.132395	0.0999511	0.0365138	-0.623027	-0.373284	-0.117953	-0.0520819	-0.0809221	-0.539924	0.454782	-0.0358216	0.376384	0.145861	-0.291929	-0.558289	0.0257246	-0.179242	-0.267762	-0.0285717	-0.00202547	-0.394211	-0.336833	0.368117
-4.35807	-0.239492	-0.6383	0.0964264	-0.0579021	-0.0215097	-0.0868097	-0.373436	0.328171	-0.36981	-0.119332	0.148878	-0.683367	-0.18397	0.394869	0.314941	-0.281977	-0.240257	-0.24409	-0.208835	-0.376394	0.296209	-0.235116	0.299445	-0.247185	0.0348823	0.0895674	-0.132548	0.0986165	0.0357946	-0.621948	-0.374186	-0.116476	-0.0521456	-0.0806366	-0.540815	0.45422	-0.0355507	0.375499	0.145935	-0.290534	-0.556572	0.0277475	-0.179075	-0.267519	-0.027161	-0.00260827	-0.393952	-0.336554	0.369429
-4.35709	-0.240452	-0.635416	0.095859	-0.0572853	-0.022575	-0.0861424	-0.376134	0.326572	-0.371181	-0.119511	0.148117	-0.682767	-0.184101	0.394948	0.314356	-0.283722	-0.241389	-0.243617	-0.209433	-0.376373	0.296235	-0.23187	0.300833	-0.247773	0.0353949	0.0903507	-0.132699	0.0972833	0.035072	-0.620864	-0.375096	-0.115003	-0.052214	-0.0803419	-0.541692	0.45365	-0.0352773	0.374609	0.145983	-0.289148	-0.554842	0.0297626	-0.178925	-0.267272	-0.0257551	-0.00318884	-0.393693	-0.33627	0.37075
-4.35611	-0.241422	-0.632532	0.0952875	-0.0566611	-0.0236515	-0.0854824	-0.378831	0.324966	-0.372557	-0.119692	0.147351	-0.682169	-0.184249	0.395025	0.313761	-0.28547	-0.242519	-0.243144	-0.210027	-0.376354	0.29625	-0.228617	0.302223	-0.24836	0.0359087	0.0911306	-0.132848	0.0959516	0.0343464	-0.619775	-0.376014	-0.113534	-0.0522874	-0.0800383	-0.542557	0.453071	-0.0350015	0.373714	0.146005	-0.287771	-0.5531	0.0317698	-0.17879	-0.267019	-0.024354	-0.00376712	-0.393433	-0.33598	0.372079
-4.35513	-0.242401	-0.629648	0.0947118	-0.0560297	-0.024739	-0.0848299	-0.381527	0.323352	-0.373938	-0.119876	0.146581	-0.681571	-0.184413	0.3951	0.313156	-0.287221	-0.243647	-0.242671	-0.210617	-0.376338	0.296254	-0.225354	0.303615	-0.248944	0.0364236	0.0919067	-0.132997	0.0946214	0.0336175	-0.61868	-0.37694	-0.112068	-0.0523656	-0.0797257	-0.543409	0.452483	-0.0347233	0.372815	0.146002	-0.286403	-0.551346	0.033769	-0.178672	-0.266763	-0.0229578	-0.0043431	-0.393174	-0.335683	0.373415
-4.35414	-0.243391	-0.626765	0.0941321	-0.0553909	-0.0258375	-0.0841851	-0.384221	0.321732	-0.375324	-0.120062	0.145806	-0.680973	-0.184594	0.395173	0.312541	-0.288974	-0.244772	-0.242199	-0.211202	-0.376324	0.296247	-0.222083	0.305009	-0.249527	0.0369397	0.0926791	-0.133143	0.093293	0.0328857	-0.617581	-0.377874	-0.110607	-0.0524488	-0.0794042	-0.544248	0.451887	-0.0344427	0.37191	0.145974	-0.285044	-0.549578	0.0357602	-0.17857	-0.266502	-0.0215664	-0.00491674	-0.392914	-0.33538	0.374759
-4.35316	-0.24439	-0.623882	0.0935483	-0.0547448	-0.0269468	-0.083548	-0.386913	0.320106	-0.376715	-0.120251	0.145028	-0.680376	-0.18479	0.395244	0.311917	-0.290731	-0.245895	-0.241727	-0.211783	-0.376313	0.29623	-0.218804	0.306405	-0.250108	0.037457	0.0934475	-0.133289	0.0919665	0.0321508	-0.616476	-0.378816	-0.109149	-0.0525371	-0.0790738	-0.545073	0.451281	-0.0341599	0.371002	0.14592	-0.283693	-0.547799	0.0377433	-0.178484	-0.266236	-0.0201798	-0.00548801	-0.392653	-0.335071	0.37611
-4.35218	-0.245398	-0.621	0.0929603	-0.0540913	-0.0280667	-0.0829189	-0.389604	0.318473	-0.378111	-0.120442	0.144245	-0.67978	-0.185003	0.395312	0.311283	-0.292489	-0.247016	-0.241255	-0.21236	-0.376303	0.296202	-0.215517	0.307802	-0.250687	0.0379755	0.0942118	-0.133433	0.090642	0.0314129	-0.615367	-0.379766	-0.107695	-0.0526304	-0.0787347	-0.545885	0.450667	-0.0338747	0.370088	0.14584	-0.282352	-0.546006	0.0397182	-0.178414	-0.265966	-0.0187979	-0.00605689	-0.392393	-0.334755	0.377469
-4.35119	-0.246416	-0.618119	0.0923681	-0.0534303	-0.0291973	-0.082298	-0.392293	0.316833	-0.379511	-0.120635	0.143458	-0.679184	-0.185232	0.395379	0.31064	-0.29425	-0.248134	-0.240784	-0.212933	-0.376297	0.296164	-0.212223	0.309201	-0.251264	0.0384952	0.094972	-0.133576	0.0893197	0.0306722	-0.614253	-0.380724	-0.106245	-0.0527289	-0.0783868	-0.546683	0.450045	-0.0335873	0.369171	0.145735	-0.28102	-0.544202	0.041685	-0.178361	-0.265691	-0.0174208	-0.00662333	-0.392131	-0.334434	0.378835
-4.35021	-0.247443	-0.615239	0.0917719	-0.0527619	-0.0303382	-0.0816853	-0.39498	0.315188	-0.380917	-0.12083	0.142666	-0.678589	-0.185478	0.395444	0.309987	-0.296013	-0.24925	-0.240314	-0.213502	-0.376292	0.296115	-0.20892	0.310602	-0.25184	0.0390162	0.0957277	-0.133717	0.0879997	0.0299285	-0.613135	-0.381688	-0.1048	-0.0528326	-0.0780303	-0.547468	0.449413	-0.0332978	0.36825	0.145605	-0.279697	-0.542385	0.0436434	-0.178323	-0.265412	-0.0160484	-0.00718732	-0.39187	-0.334105	0.380207
-4.34923	-0.248478	-0.612359	0.0911715	-0.0520861	-0.0314895	-0.0810812	-0.397664	0.313536	-0.382327	-0.121028	0.14187	-0.677995	-0.185739	0.395506	0.309325	-0.297777	-0.250363	-0.239844	-0.214066	-0.37629	0.296056	-0.205611	0.312004	-0.252415	0.0395384	0.0964789	-0.133857	0.0866822	0.0291821	-0.612012	-0.382661	-0.103359	-0.0529416	-0.0776652	-0.548239	0.448773	-0.0330061	0.367325	0.14545	-0.278384	-0.540556	0.0455936	-0.178303	-0.265128	-0.0146807	-0.00774883	-0.391608	-0.33377	0.381587
-4.34824	-0.249523	-0.60948	0.0905669	-0.0514028	-0.0326509	-0.0804857	-0.400346	0.311878	-0.383741	-0.121227	0.14107	-0.677401	-0.186016	0.395566	0.308653	-0.299543	-0.251473	-0.239376	-0.214627	-0.37629	0.295986	-0.202294	0.313407	-0.252988	0.040062	0.0972255	-0.133996	0.0853673	0.0284329	-0.610885	-0.383641	-0.101922	-0.0530559	-0.0772916	-0.548996	0.448124	-0.0327124	0.366396	0.14527	-0.27708	-0.538714	0.0475354	-0.178298	-0.264839	-0.0133178	-0.00830782	-0.391345	-0.333429	0.382973
-4.34726	-0.250576	-0.606602	0.0899582	-0.0507121	-0.0338224	-0.0798991	-0.403025	0.310215	-0.385161	-0.121429	0.140266	-0.676808	-0.186309	0.395624	0.307972	-0.30131	-0.252581	-0.238907	-0.215183	-0.376293	0.295906	-0.19897	0.314812	-0.25356	0.0405868	0.0979673	-0.134133	0.0840551	0.0276811	-0.609753	-0.384627	-0.10049	-0.0531755	-0.0769094	-0.549739	0.447466	-0.0324166	0.365464	0.145065	-0.275786	-0.536861	0.0494688	-0.178309	-0.264546	-0.0119594	-0.00886428	-0.391081	-0.333082	0.384367
-4.34628	-0.251638	-0.603725	0.0893453	-0.0500138	-0.0350037	-0.0793214	-0.405702	0.308546	-0.386585	-0.121632	0.139457	-0.676215	-0.186618	0.39568	0.307282	-0.303079	-0.253685	-0.23844	-0.215735	-0.376298	0.295816	-0.19564	0.316217	-0.254131	0.041113	0.0987041	-0.13427	0.0827458	0.0269265	-0.608618	-0.385621	-0.0990623	-0.0533006	-0.0765189	-0.550467	0.4468	-0.0321188	0.364528	0.144835	-0.274501	-0.534995	0.0513938	-0.178337	-0.264249	-0.0106057	-0.00941817	-0.390818	-0.332727	0.385766
-4.3453	-0.252708	-0.600848	0.0887282	-0.049308	-0.0361948	-0.0787528	-0.408375	0.306872	-0.388013	-0.121838	0.138643	-0.675623	-0.186942	0.395734	0.306583	-0.304848	-0.254787	-0.237974	-0.216284	-0.376305	0.295716	-0.192303	0.317624	-0.2547	0.0416405	0.0994359	-0.134405	0.0814395	0.0261694	-0.607479	-0.386623	-0.0976395	-0.0534311	-0.07612	-0.551181	0.446125	-0.0318191	0.363589	0.14458	-0.273227	-0.533117	0.0533102	-0.178381	-0.263946	-0.00925669	-0.00996948	-0.390553	-0.332367	0.387172
-4.34431	-0.253786	-0.597973	0.088107	-0.0485948	-0.0373955	-0.0781936	-0.411045	0.305193	-0.389446	-0.122045	0.137826	-0.675032	-0.187282	0.395786	0.305875	-0.306619	-0.255886	-0.237509	-0.216828	-0.376314	0.295606	-0.18896	0.319032	-0.255268	0.0421694	0.100162	-0.134538	0.0801364	0.0254098	-0.606336	-0.38763	-0.0962215	-0.0535671	-0.0757129	-0.551881	0.445441	-0.0315175	0.362648	0.1443	-0.271962	-0.531227	0.0552181	-0.178442	-0.263639	-0.00791224	-0.0105182	-0.390288	-0.331999	0.388584
-4.34333	-0.254871	-0.595099	0.0874816	-0.047874	-0.0386058	-0.0776438	-0.413712	0.303508	-0.390883	-0.122254	0.137004	-0.674441	-0.187638	0.395836	0.305158	-0.30839	-0.256982	-0.237044	-0.217368	-0.376326	0.295486	-0.18561	0.320441	-0.255836	0.0426996	0.100884	-0.134671	0.0788366	0.0246476	-0.605189	-0.388645	-0.0948085	-0.0537087	-0.0752976	-0.552566	0.444748	-0.0312141	0.361703	0.143996	-0.270706	-0.529325	0.0571174	-0.178518	-0.263328	-0.00657239	-0.0110642	-0.390021	-0.331625	0.390002
-4.34235	-0.255965	-0.592226	0.086852	-0.0471457	-0.0398253	-0.0771036	-0.416376	0.301819	-0.392324	-0.122464	0.136177	-0.673851	-0.188009	0.395883	0.304432	-0.310161	-0.258074	-0.236581	-0.217905	-0.37634	0.295356	-0.182255	0.32185	-0.256402	0.0432313	0.101599	-0.134802	0.0775402	0.023883	-0.604038	-0.389666	-0.0934004	-0.0538559	-0.0748741	-0.553236	0.444047	-0.0309089	0.360756	0.143667	-0.269461	-0.527412	0.059008	-0.178611	-0.263012	-0.0052371	-0.0116076	-0.389754	-0.331245	0.391425
-4.34136	-0.257066	-0.589354	0.0862182	-0.0464099	-0.0410541	-0.0765732	-0.419036	0.300124	-0.39377	-0.122677	0.135347	-0.673261	-0.188395	0.395928	0.303697	-0.311932	-0.259164	-0.236119	-0.218437	-0.376357	0.295216	-0.178894	0.323261	-0.256968	0.0437644	0.102309	-0.134932	0.0762474	0.0231161	-0.602884	-0.390694	-0.0919974	-0.0540089	-0.0744426	-0.553892	0.443337	-0.030602	0.359806	0.143313	-0.268226	-0.525486	0.0608899	-0.17872	-0.262691	-0.00390635	-0.0121483	-0.389487	-0.330858	0.392855
-4.34038	-0.258175	-0.586484	0.0855802	-0.0456666	-0.042292	-0.0760528	-0.421692	0.298426	-0.395219	-0.122891	0.134512	-0.672671	-0.188796	0.395971	0.302954	-0.313704	-0.26025	-0.235658	-0.218965	-0.376376	0.295067	-0.175527	0.324672	-0.257533	0.0442989	0.103013	-0.135061	0.0749582	0.0223467	-0.601727	-0.391729	-0.0905996	-0.0541675	-0.0740031	-0.554532	0.442618	-0.0302934	0.358853	0.142935	-0.267001	-0.523549	0.0627631	-0.178845	-0.262365	-0.00258014	-0.0126863	-0.389218	-0.330464	0.39429
-4.3394	-0.259291	-0.583614	0.084938	-0.0449157	-0.0435388	-0.0755424	-0.424344	0.296722	-0.396673	-0.123106	0.133672	-0.672082	-0.189213	0.396012	0.302202	-0.315475	-0.261333	-0.235199	-0.21949	-0.376397	0.294908	-0.172156	0.326083	-0.258098	0.0448349	0.103712	-0.135189	0.073673	0.0215751	-0.600567	-0.39277	-0.0892071	-0.0543319	-0.0735557	-0.555158	0.441891	-0.0299831	0.357899	0.142533	-0.265786	-0.5216	0.0646275	-0.178986	-0.262035	-0.00125844	-0.0132215	-0.388949	-0.330063	0.39573
-4.33841	-0.260414	-0.580746	0.0842916	-0.0441574	-0.0447943	-0.0750423	-0.426992	0.295015	-0.398131	-0.123323	0.132828	-0.671494	-0.189645	0.396051	0.301442	-0.317246	-0.262412	-0.234741	-0.22001	-0.37642	0.294739	-0.168779	0.327495	-0.258662	0.0453724	0.104404	-0.135316	0.0723917	0.0208013	-0.599404	-0.393816	-0.0878199	-0.0545021	-0.0731005	-0.555768	0.441154	-0.0296714	0.356942	0.142107	-0.264582	-0.51964	0.066483	-0.179143	-0.2617	5.87728e-05	-0.013754	-0.388678	-0.329656	0.397176
-4.33743	-0.261544	-0.577879	0.083641	-0.0433915	-0.0460585	-0.0745526	-0.429635	0.293303	-0.399593	-0.123542	0.13198	-0.670906	-0.190091	0.396088	0.300673	-0.319017	-0.263489	-0.234284	-0.220527	-0.376446	0.294561	-0.165397	0.328908	-0.259225	0.0459113	0.105089	-0.135442	0.0711145	0.0200253	-0.598237	-0.394869	-0.0864381	-0.0546782	-0.0726375	-0.556363	0.44041	-0.0293581	0.355984	0.141657	-0.263388	-0.517668	0.0683297	-0.179316	-0.261361	0.00137151	-0.0142838	-0.388407	-0.329242	0.398627
-4.33645	-0.262681	-0.575014	0.0829862	-0.0426182	-0.0473312	-0.0740734	-0.432274	0.291587	-0.401059	-0.123761	0.131127	-0.670319	-0.190553	0.396123	0.299896	-0.320786	-0.264561	-0.233828	-0.22104	-0.376474	0.294373	-0.162011	0.330321	-0.259788	0.0464518	0.105769	-0.135566	0.0698415	0.0192471	-0.597068	-0.395929	-0.0850619	-0.0548602	-0.0721668	-0.556942	0.439656	-0.0290434	0.355023	0.141182	-0.262204	-0.515685	0.0701675	-0.179506	-0.261016	0.0026798	-0.0148107	-0.388134	-0.328821	0.400082
-4.33546	-0.263824	-0.57215	0.0823272	-0.0418374	-0.0486123	-0.073605	-0.434909	0.289868	-0.402528	-0.123983	0.13027	-0.669731	-0.191029	0.396155	0.29911	-0.322555	-0.26563	-0.233375	-0.22155	-0.376504	0.294176	-0.158621	0.331734	-0.260351	0.0469939	0.106442	-0.13569	0.068573	0.0184669	-0.595896	-0.396993	-0.0836913	-0.0550482	-0.0716886	-0.557506	0.438894	-0.0287273	0.354061	0.140684	-0.26103	-0.51369	0.0719963	-0.179711	-0.260667	0.00398364	-0.0153348	-0.387861	-0.328393	0.401543
-4.33448	-0.264974	-0.569287	0.0816639	-0.0410491	-0.0499015	-0.0731473	-0.437539	0.288145	-0.404001	-0.124205	0.129408	-0.669145	-0.19152	0.396185	0.298316	-0.324322	-0.266695	-0.232922	-0.222055	-0.376537	0.29397	-0.155226	0.333147	-0.260913	0.0475375	0.107108	-0.135813	0.0673089	0.0176846	-0.594722	-0.398064	-0.0823264	-0.0552422	-0.0712028	-0.558054	0.438123	-0.0284099	0.353098	0.140162	-0.259868	-0.511684	0.0738161	-0.179933	-0.260313	0.00528308	-0.0158561	-0.387586	-0.327959	0.403008
-4.3335	-0.266129	-0.566426	0.0809964	-0.0402534	-0.0511988	-0.0727007	-0.440164	0.286418	-0.405478	-0.124429	0.128543	-0.668558	-0.192025	0.396213	0.297514	-0.326088	-0.267757	-0.232471	-0.222557	-0.376571	0.293755	-0.151827	0.33456	-0.261476	0.0480827	0.107767	-0.135934	0.0660495	0.0169003	-0.593545	-0.39914	-0.0809672	-0.0554422	-0.0707095	-0.558586	0.437344	-0.0280912	0.352133	0.139616	-0.258715	-0.509667	0.0756268	-0.18017	-0.259955	0.00657811	-0.0163745	-0.38731	-0.327517	0.404477
-4.33252	-0.267291	-0.563566	0.0803248	-0.0394502	-0.052504	-0.0722652	-0.442784	0.284688	-0.406959	-0.124654	0.127672	-0.667973	-0.192545	0.396239	0.296705	-0.327853	-0.268815	-0.232022	-0.223055	-0.376608	0.29353	-0.148425	0.335974	-0.262038	0.0486295	0.10842	-0.136055	0.0647948	0.0161141	-0.592365	-0.400222	-0.079614	-0.0556484	-0.0702089	-0.559103	0.436555	-0.0277713	0.351168	0.139047	-0.257574	-0.507638	0.0774285	-0.180424	-0.259591	0.00786876	-0.0168901	-0.387034	-0.327069	0.405951
-4.33153	-0.268459	-0.560708	0.0796489	-0.0386396	-0.053817	-0.071841	-0.445398	0.282955	-0.408443	-0.12488	0.126798	-0.667387	-0.193079	0.396263	0.295887	-0.329616	-0.269869	-0.231575	-0.223549	-0.376648	0.293297	-0.145019	0.337387	-0.2626	0.0491779	0.109065	-0.136175	0.0635451	0.015326	-0.591184	-0.40131	-0.0782666	-0.0558607	-0.069701	-0.559603	0.435759	-0.0274502	0.350201	0.138454	-0.256443	-0.505599	0.0792211	-0.180693	-0.259223	0.00915505	-0.0174028	-0.386755	-0.326614	0.407429
-4.33055	-0.269632	-0.557851	0.0789687	-0.0378217	-0.0551376	-0.0714281	-0.448007	0.281219	-0.409931	-0.125107	0.125919	-0.666802	-0.193627	0.396285	0.295061	-0.331376	-0.270919	-0.231129	-0.22404	-0.376689	0.293055	-0.141609	0.3388	-0.263163	0.0497279	0.109703	-0.136294	0.0623003	0.0145361	-0.59	-0.402402	-0.0769253	-0.0560792	-0.0691859	-0.560087	0.434953	-0.0271281	0.349233	0.137838	-0.255323	-0.503549	0.0810045	-0.180979	-0.25885	0.010437	-0.0179125	-0.386476	-0.326152	0.408911
-4.32957	-0.270811	-0.554996	0.0782844	-0.0369964	-0.0564656	-0.0710269	-0.450611	0.27948	-0.411422	-0.125336	0.125036	-0.666217	-0.194189	0.396304	0.294228	-0.333135	-0.271965	-0.230685	-0.224528	-0.376733	0.292803	-0.138197	0.340212	-0.263726	0.0502797	0.110334	-0.136412	0.0610607	0.0137444	-0.588815	-0.4035	-0.0755901	-0.056304	-0.0686637	-0.560555	0.434139	-0.0268049	0.348265	0.137199	-0.254213	-0.501487	0.0827788	-0.18128	-0.258473	0.0117146	-0.0184194	-0.386195	-0.325684	0.410397
-4.32858	-0.271995	-0.552143	0.0775958	-0.0361638	-0.057801	-0.0706374	-0.453209	0.277739	-0.412917	-0.125565	0.124148	-0.665632	-0.194765	0.396322	0.293387	-0.334892	-0.273007	-0.230243	-0.225011	-0.376778	0.292544	-0.134782	0.341625	-0.264289	0.0508331	0.110956	-0.136529	0.0598264	0.0129509	-0.587627	-0.404603	-0.074261	-0.056535	-0.0681345	-0.561007	0.433317	-0.0264809	0.347296	0.136537	-0.253115	-0.499415	0.0845438	-0.181597	-0.25809	0.0129879	-0.0189233	-0.385913	-0.325208	0.411886
-4.3276	-0.273184	-0.549291	0.076903	-0.0353238	-0.0591435	-0.0702596	-0.455801	0.275995	-0.414414	-0.125796	0.123256	-0.665048	-0.195354	0.396337	0.292538	-0.336645	-0.274045	-0.229803	-0.225491	-0.376827	0.292275	-0.131364	0.343036	-0.264852	0.0513882	0.111572	-0.136645	0.0585975	0.0121558	-0.586438	-0.405711	-0.0729383	-0.0567723	-0.0675983	-0.561442	0.432485	-0.0261559	0.346327	0.135852	-0.252027	-0.497333	0.0862996	-0.181929	-0.257702	0.0142569	-0.0194242	-0.38563	-0.324725	0.413379
-4.32662	-0.274378	-0.546441	0.076206	-0.0344766	-0.060493	-0.0698939	-0.458387	0.274248	-0.415915	-0.126027	0.12236	-0.664463	-0.195958	0.39635	0.291682	-0.338396	-0.275079	-0.229364	-0.225968	-0.376877	0.291998	-0.127944	0.344448	-0.265416	0.051945	0.112179	-0.136761	0.0573742	0.011359	-0.585247	-0.406823	-0.0716218	-0.0570161	-0.0670553	-0.561861	0.431646	-0.0258301	0.345358	0.135143	-0.250951	-0.495239	0.0880461	-0.182278	-0.25731	0.0155216	-0.0199222	-0.385345	-0.324236	0.414875
-4.32563	-0.275577	-0.543593	0.0755048	-0.0336222	-0.0618494	-0.0695403	-0.460967	0.2725	-0.417419	-0.126259	0.12146	-0.663879	-0.196575	0.396361	0.290818	-0.340145	-0.276108	-0.228928	-0.226442	-0.376929	0.291713	-0.124522	0.345858	-0.26598	0.0525036	0.112778	-0.136876	0.0561564	0.0105606	-0.584055	-0.407941	-0.0703118	-0.0572662	-0.0665055	-0.562263	0.430797	-0.0255035	0.344388	0.134412	-0.249885	-0.493135	0.0897832	-0.182642	-0.256913	0.0167821	-0.0204172	-0.385059	-0.323739	0.416375
-4.32465	-0.27678	-0.540746	0.0747993	-0.0327606	-0.0632124	-0.0691989	-0.463541	0.270749	-0.418926	-0.126492	0.120555	-0.663296	-0.197205	0.396371	0.289947	-0.34189	-0.277134	-0.228494	-0.226912	-0.376984	0.291419	-0.121097	0.347268	-0.266546	0.053064	0.11337	-0.13699	0.0549445	0.00976063	-0.582862	-0.409062	-0.0690082	-0.0575228	-0.065949	-0.562648	0.429941	-0.0251762	0.343419	0.133659	-0.248831	-0.491021	0.0915111	-0.183021	-0.256511	0.0180383	-0.0209092	-0.384772	-0.323236	0.417877
-4.32367	-0.277988	-0.537901	0.0740897	-0.0318918	-0.064582	-0.0688699	-0.466108	0.268997	-0.420437	-0.126726	0.119646	-0.662712	-0.197848	0.396377	0.289069	-0.343631	-0.278155	-0.228061	-0.227378	-0.37704	0.291117	-0.117671	0.348678	-0.267111	0.0536261	0.113952	-0.137103	0.0537384	0.00895919	-0.581667	-0.410189	-0.0677112	-0.0577859	-0.065386	-0.563017	0.429075	-0.0248483	0.342449	0.132883	-0.247787	-0.488896	0.0932295	-0.183417	-0.256104	0.0192903	-0.0213981	-0.384482	-0.322725	0.419382
-4.32269	-0.2792	-0.535058	0.0733758	-0.0310159	-0.065958	-0.0685533	-0.468669	0.267242	-0.42195	-0.126961	0.118733	-0.662128	-0.198505	0.396382	0.288183	-0.34537	-0.279172	-0.227631	-0.227841	-0.377099	0.290807	-0.114244	0.350086	-0.267678	0.0541901	0.114527	-0.137216	0.0525384	0.00815629	-0.580471	-0.411319	-0.0664208	-0.0580555	-0.0648164	-0.563369	0.428201	-0.0245199	0.34148	0.132085	-0.246755	-0.486761	0.0949385	-0.183827	-0.255692	0.0205381	-0.0218841	-0.384192	-0.322208	0.42089
-4.3217	-0.280415	-0.532216	0.0726577	-0.0301329	-0.0673402	-0.0682494	-0.471223	0.265487	-0.423465	-0.127196	0.117815	-0.661545	-0.199174	0.396385	0.287291	-0.347104	-0.280184	-0.227203	-0.228301	-0.37716	0.290488	-0.110815	0.351493	-0.268246	0.0547559	0.115093	-0.137329	0.0513445	0.00735199	-0.579274	-0.412454	-0.0651371	-0.0583317	-0.0642405	-0.563703	0.427319	-0.024191	0.340512	0.131264	-0.245734	-0.484616	0.0966381	-0.184254	-0.255275	0.0217816	-0.022367	-0.3839	-0.321683	0.422401
-4.32072	-0.281635	-0.529377	0.0719354	-0.0292429	-0.0687284	-0.0679583	-0.47377	0.26373	-0.424984	-0.127432	0.116894	-0.660962	-0.199857	0.396386	0.286392	-0.348835	-0.281192	-0.226777	-0.228758	-0.377223	0.290162	-0.107385	0.352899	-0.268814	0.0553235	0.11565	-0.13744	0.0501568	0.00654634	-0.578076	-0.413593	-0.0638602	-0.0586145	-0.0636582	-0.564021	0.426428	-0.0238616	0.339544	0.130422	-0.244724	-0.482461	0.0983282	-0.184695	-0.254854	0.023021	-0.0228469	-0.383606	-0.321152	0.423914
-4.31974	-0.282858	-0.526539	0.0712089	-0.028346	-0.0701226	-0.06768	-0.47631	0.261972	-0.426505	-0.127669	0.115968	-0.660378	-0.200552	0.396385	0.285485	-0.350561	-0.282195	-0.226353	-0.229212	-0.377288	0.289828	-0.103955	0.354304	-0.269384	0.055893	0.116198	-0.137551	0.0489755	0.00573937	-0.576878	-0.414736	-0.0625902	-0.0589039	-0.0630697	-0.564321	0.425529	-0.023532	0.338577	0.129557	-0.243725	-0.480296	0.100009	-0.185152	-0.254427	0.0242562	-0.0233237	-0.38331	-0.320613	0.425428
-4.31875	-0.284085	-0.523703	0.0704782	-0.0274421	-0.0715226	-0.0674147	-0.478843	0.260212	-0.428029	-0.127906	0.115038	-0.659795	-0.20126	0.396381	0.284572	-0.352284	-0.283194	-0.225931	-0.229662	-0.377355	0.289486	-0.100523	0.355708	-0.269954	0.0564643	0.116737	-0.137662	0.0478007	0.00493114	-0.575679	-0.415883	-0.061327	-0.0592001	-0.0624751	-0.564604	0.424621	-0.023202	0.337611	0.128671	-0.242738	-0.47812	0.10168	-0.185624	-0.253996	0.0254872	-0.0237974	-0.383013	-0.320067	0.426945
-4.31777	-0.285315	-0.520869	0.0697433	-0.0265313	-0.0729281	-0.0671626	-0.481368	0.258452	-0.429556	-0.128144	0.114104	-0.659212	-0.20198	0.396376	0.283652	-0.354001	-0.284188	-0.225512	-0.23011	-0.377424	0.289137	-0.0970919	0.357111	-0.270526	0.0570376	0.117267	-0.137772	0.0466325	0.00412169	-0.574479	-0.417034	-0.0600708	-0.0595029	-0.0618745	-0.56487	0.423705	-0.0228718	0.336646	0.127763	-0.241762	-0.475936	0.103341	-0.186112	-0.253559	0.0267141	-0.0242681	-0.382714	-0.319515	0.428464
-4.31679	-0.286548	-0.518036	0.0690042	-0.0256137	-0.0743391	-0.0669236	-0.483887	0.256691	-0.431085	-0.128382	0.113166	-0.658628	-0.202712	0.396369	0.282726	-0.355715	-0.285177	-0.225095	-0.230554	-0.377496	0.28878	-0.0936602	0.358512	-0.271099	0.0576129	0.117787	-0.137882	0.045471	0.00331107	-0.573279	-0.418188	-0.0588217	-0.0598126	-0.0612679	-0.565119	0.42278	-0.0225415	0.335683	0.126833	-0.240797	-0.473741	0.104993	-0.186615	-0.253118	0.0279369	-0.0247356	-0.382414	-0.318955	0.429985
-4.3158	-0.287783	-0.515206	0.0682609	-0.0246894	-0.0757553	-0.066698	-0.486397	0.25493	-0.432616	-0.128621	0.112223	-0.658045	-0.203456	0.396359	0.281793	-0.357423	-0.286162	-0.22468	-0.230995	-0.377569	0.288415	-0.0902286	0.359912	-0.271674	0.05819	0.118298	-0.137992	0.0443163	0.00249932	-0.572078	-0.419346	-0.0575796	-0.060129	-0.0606556	-0.56535	0.421847	-0.0222112	0.33472	0.125882	-0.239844	-0.471537	0.106636	-0.187133	-0.252671	0.0291556	-0.0252001	-0.382111	-0.318388	0.431507
-4.31482	-0.289022	-0.512378	0.0675135	-0.0237583	-0.0771767	-0.0664859	-0.4889	0.253168	-0.43415	-0.12886	0.111277	-0.657462	-0.204213	0.396348	0.280854	-0.359126	-0.287142	-0.224268	-0.231434	-0.377644	0.288043	-0.0867973	0.36131	-0.27225	0.0587692	0.1188	-0.138101	0.0431686	0.0016865	-0.570878	-0.420507	-0.0563447	-0.0604523	-0.0600374	-0.565563	0.420906	-0.0218808	0.333759	0.12491	-0.238902	-0.469323	0.108268	-0.187665	-0.25222	0.0303701	-0.0256614	-0.381807	-0.317815	0.43303
-4.31384	-0.290262	-0.509551	0.0667618	-0.0228207	-0.0786031	-0.0662874	-0.491395	0.251406	-0.435685	-0.1291	0.110327	-0.656878	-0.204981	0.396335	0.279908	-0.360824	-0.288117	-0.223858	-0.231869	-0.377721	0.287664	-0.0833666	0.362707	-0.272828	0.0593503	0.119292	-0.13821	0.0420279	0.000872647	-0.569677	-0.421671	-0.0551171	-0.0607824	-0.0594137	-0.565759	0.419956	-0.0215506	0.3328	0.123916	-0.237971	-0.467101	0.109891	-0.188213	-0.251763	0.0315805	-0.0261197	-0.381501	-0.317234	0.434555
-4.31286	-0.291505	-0.506726	0.0660061	-0.0218764	-0.0800342	-0.0661025	-0.493882	0.249644	-0.437223	-0.12934	0.109372	-0.656294	-0.20576	0.39632	0.278956	-0.362517	-0.289087	-0.223451	-0.232302	-0.3778	0.287278	-0.0799367	0.364101	-0.273407	0.0599334	0.119773	-0.138319	0.0408943	5.78066e-05	-0.568477	-0.422838	-0.0538967	-0.0611195	-0.0587844	-0.565937	0.418998	-0.0212205	0.331843	0.122902	-0.237052	-0.464868	0.111505	-0.188776	-0.251302	0.0327869	-0.0265748	-0.381193	-0.316646	0.43608
-4.31187	-0.292751	-0.503903	0.0652461	-0.0209257	-0.08147	-0.0659314	-0.496361	0.247882	-0.438763	-0.129581	0.108414	-0.65571	-0.206552	0.396303	0.277998	-0.364204	-0.290052	-0.223046	-0.232731	-0.377881	0.286885	-0.0765079	0.365494	-0.273988	0.0605186	0.120245	-0.138427	0.039768	-0.000757975	-0.567277	-0.424009	-0.0526837	-0.0614635	-0.0581497	-0.566097	0.418032	-0.0208906	0.330887	0.121867	-0.236144	-0.462627	0.113108	-0.189354	-0.250835	0.0339892	-0.0270267	-0.380883	-0.316051	0.437607
-4.31089	-0.293998	-0.501082	0.064482	-0.0199685	-0.0829103	-0.0657743	-0.498832	0.24612	-0.440305	-0.129822	0.107452	-0.655126	-0.207354	0.396284	0.277034	-0.365885	-0.291012	-0.222643	-0.233158	-0.377964	0.286484	-0.0730802	0.366885	-0.274571	0.0611058	0.120707	-0.138535	0.0386491	-0.00157465	-0.566077	-0.425182	-0.0514781	-0.0618145	-0.0575097	-0.56624	0.417057	-0.0205611	0.329933	0.120811	-0.235248	-0.460377	0.114702	-0.189946	-0.250364	0.0351874	-0.0274756	-0.380571	-0.315449	0.439134
-4.30991	-0.295246	-0.498264	0.0637138	-0.0190049	-0.0843548	-0.0656311	-0.501294	0.244359	-0.441849	-0.130063	0.106485	-0.654542	-0.208168	0.396263	0.276063	-0.367561	-0.291968	-0.222243	-0.233583	-0.378049	0.286077	-0.0696541	0.368275	-0.275155	0.061695	0.121158	-0.138644	0.0375377	-0.00239218	-0.564877	-0.426358	-0.05028	-0.0621724	-0.0568644	-0.566365	0.416074	-0.0202319	0.328982	0.119735	-0.234363	-0.458118	0.116286	-0.190553	-0.249887	0.0363816	-0.0279213	-0.380257	-0.31484	0.440661
-4.30892	-0.296497	-0.495447	0.0629414	-0.0180351	-0.0858036	-0.0655021	-0.503748	0.242598	-0.443394	-0.130305	0.105515	-0.653957	-0.208992	0.39624	0.275087	-0.36923	-0.292918	-0.221846	-0.234004	-0.378136	0.285664	-0.0662297	0.369662	-0.275742	0.0622864	0.121599	-0.138752	0.0364338	-0.00321051	-0.563678	-0.427536	-0.0490894	-0.0625375	-0.056214	-0.566471	0.415083	-0.0199033	0.328033	0.118639	-0.23349	-0.45585	0.117861	-0.191175	-0.249406	0.0375717	-0.0283638	-0.379942	-0.314224	0.442189
-4.30794	-0.297748	-0.492631	0.062165	-0.0170591	-0.0872563	-0.0653872	-0.506193	0.240839	-0.444942	-0.130546	0.104541	-0.653372	-0.209828	0.396215	0.274105	-0.370893	-0.293863	-0.221451	-0.234423	-0.378225	0.285243	-0.0628072	0.371047	-0.27633	0.0628799	0.122029	-0.13886	0.0353376	-0.0040296	-0.56248	-0.428718	-0.0479064	-0.0629096	-0.0555587	-0.56656	0.414083	-0.0195751	0.327086	0.117522	-0.232628	-0.453573	0.119426	-0.191811	-0.248919	0.0387578	-0.0288032	-0.379624	-0.313601	0.443717
-4.30696	-0.299001	-0.489818	0.0613844	-0.0160769	-0.0887129	-0.0652867	-0.50863	0.239079	-0.446491	-0.130788	0.103564	-0.652786	-0.210674	0.396189	0.273118	-0.372549	-0.294802	-0.221059	-0.234839	-0.378315	0.284816	-0.0593869	0.372429	-0.276921	0.0634754	0.122449	-0.138968	0.0342492	-0.00484941	-0.561282	-0.429901	-0.0467311	-0.0632888	-0.0548984	-0.56663	0.413076	-0.0192476	0.326142	0.116385	-0.231778	-0.451287	0.12098	-0.192462	-0.248427	0.0399399	-0.0292394	-0.379304	-0.31297	0.445245
-4.30597	-0.300254	-0.487007	0.0605997	-0.0150886	-0.0901731	-0.0652006	-0.511057	0.237321	-0.448041	-0.13103	0.102582	-0.652201	-0.21153	0.396161	0.272124	-0.374199	-0.295737	-0.220669	-0.235253	-0.378408	0.284383	-0.055969	0.37381	-0.277514	0.0640732	0.122857	-0.139076	0.0331686	-0.00566988	-0.560085	-0.431087	-0.0455634	-0.0636751	-0.0542333	-0.566683	0.41206	-0.0189208	0.3252	0.115228	-0.230939	-0.448994	0.122525	-0.193127	-0.24793	0.041118	-0.0296725	-0.378982	-0.312333	0.446773
-4.30499	-0.301509	-0.484198	0.059811	-0.0140944	-0.0916369	-0.0651289	-0.513476	0.235565	-0.449593	-0.131273	0.101597	-0.651614	-0.212397	0.39613	0.271126	-0.375842	-0.296666	-0.220282	-0.235664	-0.378502	0.283944	-0.0525537	0.375188	-0.278109	0.0646731	0.123255	-0.139185	0.0320961	-0.00649098	-0.558889	-0.432274	-0.0444035	-0.0640686	-0.0535635	-0.566717	0.411036	-0.0185947	0.324261	0.114052	-0.230112	-0.446691	0.124061	-0.193806	-0.247428	0.042292	-0.0301024	-0.378657	-0.311689	0.448301
-4.30401	-0.302764	-0.481391	0.0590181	-0.0130943	-0.093104	-0.0650719	-0.515885	0.233809	-0.451146	-0.131515	0.100608	-0.651028	-0.213274	0.396099	0.270122	-0.377477	-0.29759	-0.219897	-0.236073	-0.378598	0.283498	-0.0491413	0.376564	-0.278707	0.0652752	0.123641	-0.139293	0.0310316	-0.00731267	-0.557695	-0.433464	-0.0432514	-0.0644693	-0.0528891	-0.566733	0.410004	-0.0182696	0.323326	0.112856	-0.229296	-0.444381	0.125586	-0.1945	-0.246921	0.0434621	-0.0305291	-0.378331	-0.311037	0.449828
-4.30302	-0.304019	-0.478585	0.0582212	-0.0120885	-0.0945743	-0.0650296	-0.518285	0.232055	-0.452701	-0.131758	0.0996156	-0.65044	-0.214161	0.396065	0.269112	-0.379106	-0.298509	-0.219516	-0.236479	-0.378696	0.283046	-0.045732	0.377937	-0.279307	0.0658794	0.124016	-0.139402	0.0299752	-0.00813489	-0.556501	-0.434656	-0.0421072	-0.0648772	-0.0522103	-0.566731	0.408963	-0.0179453	0.322393	0.11164	-0.228492	-0.442062	0.127101	-0.195207	-0.246409	0.0446281	-0.0309526	-0.378002	-0.310379	0.451354
-4.30204	-0.305274	-0.475782	0.0574203	-0.0110769	-0.0960476	-0.065002	-0.520676	0.230303	-0.454257	-0.132001	0.0986194	-0.649853	-0.215058	0.39603	0.268097	-0.380727	-0.299422	-0.219137	-0.236883	-0.378795	0.282589	-0.0423261	0.379307	-0.279909	0.0664859	0.12438	-0.139511	0.0289272	-0.0089576	-0.555309	-0.435849	-0.0409709	-0.0652924	-0.0515271	-0.56671	0.407915	-0.0176221	0.321463	0.110406	-0.227699	-0.439736	0.128607	-0.195929	-0.245892	0.0457902	-0.031373	-0.377671	-0.309713	0.45288
-4.30106	-0.306529	-0.472981	0.0566154	-0.0100597	-0.0975238	-0.0649893	-0.523057	0.228553	-0.455813	-0.132243	0.0976197	-0.649264	-0.215965	0.395993	0.267077	-0.38234	-0.30033	-0.21876	-0.237285	-0.378896	0.282125	-0.0389237	0.380675	-0.280514	0.0670947	0.124732	-0.13962	0.0278874	-0.00978076	-0.554118	-0.437044	-0.0398425	-0.0657148	-0.0508396	-0.566671	0.406859	-0.0173	0.320537	0.109152	-0.226918	-0.437401	0.130103	-0.196665	-0.245369	0.0469483	-0.0317902	-0.377338	-0.30904	0.454404
-4.30008	-0.307784	-0.470181	0.0558064	-0.00903693	-0.0990027	-0.0649915	-0.525429	0.226805	-0.457371	-0.132486	0.0966164	-0.648676	-0.21688	0.395954	0.266052	-0.383946	-0.301232	-0.218387	-0.237684	-0.378999	0.281656	-0.0355251	0.382041	-0.281122	0.0677057	0.125073	-0.13973	0.0268562	-0.0106043	-0.552929	-0.43824	-0.0387221	-0.0661446	-0.050148	-0.566614	0.405794	-0.0169791	0.319614	0.107879	-0.226149	-0.435059	0.131588	-0.197414	-0.244842	0.0481025	-0.0322042	-0.377003	-0.308361	0.455928
-4.29909	-0.309039	-0.467384	0.0549934	-0.00800878	-0.100484	-0.0650088	-0.527791	0.225058	-0.45893	-0.132729	0.0956096	-0.648086	-0.217806	0.395914	0.265022	-0.385544	-0.302129	-0.218016	-0.238081	-0.379104	0.281181	-0.0321305	0.383403	-0.281732	0.0683189	0.125401	-0.13984	0.0258334	-0.0114283	-0.551742	-0.439438	-0.0376098	-0.0665817	-0.0494524	-0.566538	0.404722	-0.0166594	0.318695	0.106588	-0.225391	-0.432709	0.133064	-0.198178	-0.244309	0.0492526	-0.032615	-0.376665	-0.307674	0.45745
-4.29811	-0.310293	-0.464588	0.0541765	-0.0069753	-0.101968	-0.0650411	-0.530143	0.223315	-0.460489	-0.132972	0.0945994	-0.647496	-0.21874	0.395872	0.263988	-0.387133	-0.30302	-0.217648	-0.238476	-0.37921	0.280701	-0.0287402	0.384762	-0.282345	0.0689345	0.125718	-0.139951	0.0248193	-0.0122525	-0.550556	-0.440637	-0.0365056	-0.0670261	-0.0487528	-0.566444	0.403641	-0.016341	0.317779	0.105278	-0.224644	-0.430351	0.13453	-0.198955	-0.243771	0.0503988	-0.0330227	-0.376325	-0.30698	0.45897
-4.29713	-0.311546	-0.461795	0.0533556	-0.00593661	-0.103454	-0.0650887	-0.532485	0.221573	-0.46205	-0.133215	0.0935857	-0.646905	-0.219683	0.395828	0.262948	-0.388715	-0.303906	-0.217283	-0.238869	-0.379318	0.280215	-0.0253544	0.386119	-0.282961	0.0695524	0.126023	-0.140062	0.0238139	-0.013077	-0.549372	-0.441837	-0.0354095	-0.0674779	-0.0480495	-0.566331	0.402553	-0.0160241	0.316867	0.10395	-0.223909	-0.427987	0.135986	-0.199745	-0.243228	0.0515411	-0.0334271	-0.375982	-0.30628	0.460489
-4.29614	-0.312798	-0.459003	0.0525307	-0.00489279	-0.104942	-0.0651515	-0.534817	0.219834	-0.463611	-0.133458	0.0925687	-0.646313	-0.220635	0.395783	0.261904	-0.390288	-0.304786	-0.21692	-0.23926	-0.379428	0.279724	-0.0219733	0.387472	-0.28358	0.0701725	0.126315	-0.140174	0.0228173	-0.0139018	-0.54819	-0.443038	-0.0343216	-0.0679372	-0.0473424	-0.5662	0.401457	-0.0157088	0.315959	0.102603	-0.223186	-0.425614	0.137432	-0.20055	-0.24268	0.0526794	-0.0338284	-0.375637	-0.305572	0.462006
-4.29516	-0.314049	-0.456214	0.0517019	-0.00384395	-0.106432	-0.0652296	-0.537138	0.218098	-0.465172	-0.133701	0.0915484	-0.645721	-0.221595	0.395736	0.260855	-0.391852	-0.305661	-0.216561	-0.239649	-0.379539	0.279228	-0.0185971	0.388823	-0.284202	0.0707951	0.126595	-0.140286	0.0218295	-0.0147267	-0.54701	-0.444239	-0.0332419	-0.0684038	-0.0466318	-0.56605	0.400353	-0.015395	0.315055	0.101239	-0.222474	-0.423235	0.138868	-0.201367	-0.242127	0.0538137	-0.0342265	-0.37529	-0.304857	0.463521
-4.29418	-0.315299	-0.453426	0.0508692	-0.00279021	-0.107923	-0.0653231	-0.53945	0.216365	-0.466734	-0.133944	0.0905248	-0.645128	-0.222563	0.395688	0.259801	-0.393408	-0.306529	-0.216204	-0.240035	-0.379651	0.278727	-0.0152261	0.39017	-0.284827	0.07142	0.126863	-0.140399	0.0208507	-0.0155518	-0.545833	-0.445442	-0.0321705	-0.068878	-0.0459178	-0.565881	0.399241	-0.0150828	0.314155	0.099856	-0.221774	-0.420849	0.140294	-0.202198	-0.241568	0.0549441	-0.0346215	-0.37494	-0.304136	0.465033
-4.29319	-0.316547	-0.45064	0.0500326	-0.00173168	-0.109417	-0.0654321	-0.541751	0.214635	-0.468296	-0.134187	0.0894981	-0.644534	-0.22354	0.395638	0.258744	-0.394954	-0.307393	-0.21585	-0.24042	-0.379766	0.278221	-0.0118606	0.391514	-0.285455	0.0720473	0.127118	-0.140513	0.019881	-0.016377	-0.544657	-0.446645	-0.0311074	-0.0693596	-0.0452004	-0.565694	0.398121	-0.0147725	0.313259	0.0984557	-0.221085	-0.418455	0.141709	-0.203042	-0.241005	0.0560705	-0.0350132	-0.374587	-0.303407	0.466544
-4.29221	-0.317793	-0.447856	0.0491922	-0.000668454	-0.110911	-0.0655567	-0.544042	0.212908	-0.469858	-0.134429	0.0884681	-0.643939	-0.224525	0.395587	0.257681	-0.396491	-0.30825	-0.215499	-0.240803	-0.379881	0.27771	-0.00850061	0.392854	-0.286086	0.072677	0.127361	-0.140628	0.0189203	-0.0172023	-0.543484	-0.447848	-0.0300527	-0.0698487	-0.0444798	-0.565488	0.396993	-0.014464	0.312368	0.0970379	-0.220407	-0.416055	0.143115	-0.203899	-0.240436	0.057193	-0.0354018	-0.374232	-0.302671	0.468051
-4.29123	-0.319038	-0.445074	0.0483478	0.00039934	-0.112407	-0.0656969	-0.546322	0.211185	-0.471421	-0.134672	0.087435	-0.643343	-0.225517	0.395534	0.256615	-0.39802	-0.309101	-0.21515	-0.241184	-0.379998	0.277194	-0.00514654	0.394192	-0.28672	0.0733091	0.127591	-0.140743	0.0179689	-0.0180275	-0.542314	-0.449052	-0.0290063	-0.0703453	-0.0437561	-0.565264	0.395857	-0.0141574	0.311481	0.0956028	-0.219741	-0.413649	0.144511	-0.204769	-0.239862	0.0583116	-0.0357872	-0.373875	-0.301929	0.469557
-4.29025	-0.32028	-0.442294	0.0474997	0.00147159	-0.113904	-0.0658527	-0.548591	0.209465	-0.472984	-0.134914	0.0863989	-0.642746	-0.226517	0.39548	0.255545	-0.399538	-0.309947	-0.214805	-0.241564	-0.380117	0.276674	-0.00179856	0.395525	-0.287358	0.0739436	0.127807	-0.14086	0.0170267	-0.0188528	-0.541146	-0.450256	-0.0279684	-0.0708495	-0.0430294	-0.56502	0.394714	-0.0138528	0.310598	0.0941504	-0.219086	-0.411235	0.145897	-0.205652	-0.239282	0.0594262	-0.0361694	-0.373515	-0.301179	0.471059
-4.28926	-0.32152	-0.439516	0.0466478	0.00254817	-0.115402	-0.0660243	-0.550849	0.207749	-0.474546	-0.135157	0.0853597	-0.642148	-0.227525	0.395425	0.25447	-0.401047	-0.310787	-0.214462	-0.241941	-0.380237	0.27615	0.0015431	0.396856	-0.287999	0.0745806	0.128011	-0.140977	0.0160939	-0.0196779	-0.539981	-0.45146	-0.026939	-0.0713612	-0.0422999	-0.564758	0.393563	-0.0135503	0.309721	0.0926811	-0.218443	-0.408816	0.147273	-0.206547	-0.238698	0.0605369	-0.0365485	-0.373152	-0.300423	0.472558
-4.28828	-0.322757	-0.43674	0.0457921	0.00362897	-0.1169	-0.0662116	-0.553097	0.206036	-0.476109	-0.135399	0.0843176	-0.641549	-0.228539	0.395368	0.253392	-0.402547	-0.311621	-0.214122	-0.242317	-0.380359	0.275621	0.00487821	0.398182	-0.288644	0.07522	0.128201	-0.141095	0.0151705	-0.020503	-0.538818	-0.452664	-0.025918	-0.0718806	-0.0415676	-0.564478	0.392405	-0.01325	0.308847	0.0911949	-0.217811	-0.40639	0.148639	-0.207456	-0.238108	0.0616436	-0.0369244	-0.372786	-0.299659	0.474054
-4.2873	-0.323992	-0.433965	0.0449326	0.00471387	-0.1184	-0.0664148	-0.555333	0.204328	-0.477671	-0.135641	0.0832726	-0.640949	-0.229561	0.39531	0.252309	-0.404036	-0.312449	-0.213786	-0.242692	-0.380482	0.275088	0.00820654	0.399505	-0.289292	0.075862	0.128379	-0.141215	0.0142565	-0.0213279	-0.537659	-0.453868	-0.0249056	-0.0724075	-0.0408327	-0.564178	0.391238	-0.012952	0.307979	0.0896921	-0.21719	-0.403958	0.149994	-0.208377	-0.237513	0.0627464	-0.0372972	-0.372418	-0.298889	0.475547
-4.28631	-0.325223	-0.431192	0.0440694	0.00580273	-0.119899	-0.0666339	-0.557559	0.202624	-0.479233	-0.135883	0.0822247	-0.640348	-0.230589	0.39525	0.251223	-0.405515	-0.313271	-0.213452	-0.243064	-0.380606	0.274551	0.0115279	0.400824	-0.289944	0.0765064	0.128543	-0.141335	0.0133521	-0.0221527	-0.536502	-0.455072	-0.0239018	-0.0729421	-0.0400953	-0.56386	0.390065	-0.0126563	0.307116	0.0881728	-0.216581	-0.40152	0.15134	-0.20931	-0.236913	0.0638452	-0.0376668	-0.372047	-0.298112	0.477036
-4.28533	-0.326452	-0.428422	0.0432025	0.00689544	-0.121399	-0.066869	-0.559773	0.200924	-0.480794	-0.136125	0.0811741	-0.639745	-0.231624	0.39519	0.250134	-0.406984	-0.314087	-0.21312	-0.243436	-0.380732	0.27401	0.014842	0.40214	-0.2906	0.0771533	0.128693	-0.141457	0.0124574	-0.0229772	-0.535349	-0.456275	-0.0229066	-0.0734843	-0.0393556	-0.563524	0.388883	-0.0123631	0.306258	0.0866372	-0.215983	-0.399076	0.152675	-0.210256	-0.236307	0.0649401	-0.0380332	-0.371674	-0.297328	0.478521
-4.28435	-0.327677	-0.425653	0.0423319	0.00799186	-0.122899	-0.06712	-0.561976	0.199228	-0.482355	-0.136367	0.0801206	-0.639142	-0.232666	0.395128	0.24904	-0.408443	-0.314897	-0.212792	-0.243805	-0.380859	0.273465	0.0181486	0.403451	-0.291259	0.0778028	0.12883	-0.14158	0.0115723	-0.0238014	-0.534198	-0.457477	-0.02192	-0.0740341	-0.0386136	-0.563168	0.387694	-0.0120724	0.305405	0.0850856	-0.215396	-0.396626	0.154001	-0.211214	-0.235697	0.0660311	-0.0383965	-0.371297	-0.296537	0.480003
-4.28336	-0.328899	-0.422886	0.0414577	0.00909187	-0.124399	-0.0673871	-0.564167	0.197537	-0.483916	-0.136609	0.0790646	-0.638537	-0.233713	0.395065	0.247943	-0.409891	-0.315701	-0.212467	-0.244174	-0.380987	0.272916	0.0214476	0.404759	-0.291922	0.0784548	0.128953	-0.141704	0.010697	-0.0246253	-0.533051	-0.458679	-0.020942	-0.0745917	-0.0378695	-0.562794	0.386498	-0.0117844	0.304557	0.083518	-0.214821	-0.394171	0.155316	-0.212184	-0.235081	0.067118	-0.0387567	-0.370918	-0.295739	0.481481
-4.28238	-0.330117	-0.42012	0.0405798	0.0101953	-0.125899	-0.0676703	-0.566347	0.19585	-0.485475	-0.13685	0.0780058	-0.637931	-0.234767	0.395	0.246843	-0.411328	-0.316499	-0.212144	-0.24454	-0.381116	0.272364	0.0247386	0.406063	-0.292588	0.0791094	0.129062	-0.14183	0.0098315	-0.0254488	-0.531908	-0.45988	-0.0199728	-0.0751569	-0.0371234	-0.562401	0.385294	-0.011499	0.303714	0.0819348	-0.214257	-0.39171	0.156621	-0.213166	-0.23446	0.0682011	-0.0391138	-0.370536	-0.294935	0.482954
-4.2814	-0.331332	-0.417357	0.0396983	0.0113021	-0.127398	-0.0679697	-0.568515	0.194168	-0.487034	-0.137092	0.0769445	-0.637324	-0.235826	0.394935	0.24574	-0.412755	-0.317291	-0.211824	-0.244906	-0.381247	0.271808	0.0280215	0.407363	-0.293259	0.0797665	0.129157	-0.141957	0.00897587	-0.026272	-0.530768	-0.46108	-0.0190123	-0.0757298	-0.0363754	-0.561989	0.384082	-0.0112164	0.302877	0.0803359	-0.213703	-0.389244	0.157916	-0.21416	-0.233833	0.0692801	-0.0394677	-0.370151	-0.294124	0.484423
-4.28041	-0.332542	-0.414595	0.0388133	0.0124121	-0.128897	-0.0682852	-0.570672	0.192492	-0.488591	-0.137333	0.0758807	-0.636715	-0.236891	0.394869	0.244633	-0.41417	-0.318077	-0.211508	-0.24527	-0.381379	0.271249	0.0312961	0.408658	-0.293933	0.0804262	0.129238	-0.142086	0.00813017	-0.0270947	-0.529631	-0.462279	-0.0180605	-0.0763105	-0.0356257	-0.561558	0.382863	-0.0109367	0.302045	0.0787218	-0.213161	-0.386773	0.159201	-0.215166	-0.233202	0.0703552	-0.0398185	-0.369764	-0.293306	0.485888
-4.27943	-0.333748	-0.411835	0.0379247	0.0135251	-0.130395	-0.0686169	-0.572817	0.19082	-0.490148	-0.137574	0.0748145	-0.636105	-0.237962	0.394801	0.243523	-0.415575	-0.318857	-0.211194	-0.245633	-0.381512	0.270687	0.0345621	0.40995	-0.294612	0.0810886	0.129305	-0.142216	0.00729446	-0.0279169	-0.528498	-0.463477	-0.0171175	-0.0768989	-0.0348743	-0.561109	0.381637	-0.0106599	0.301219	0.0770925	-0.21263	-0.384296	0.160476	-0.216183	-0.232565	0.0714264	-0.0401663	-0.369373	-0.292481	0.487348
-4.27845	-0.33495	-0.409077	0.0370327	0.014641	-0.131892	-0.0689648	-0.57495	0.189154	-0.491703	-0.137815	0.0737459	-0.635493	-0.239037	0.394733	0.24241	-0.416968	-0.31963	-0.210883	-0.245994	-0.381646	0.270121	0.0378193	0.411237	-0.295295	0.0817535	0.129358	-0.142347	0.0064688	-0.0287386	-0.527369	-0.464673	-0.0161834	-0.077495	-0.0341215	-0.560641	0.380403	-0.0103862	0.300399	0.0754482	-0.21211	-0.381815	0.161741	-0.217212	-0.231923	0.0724935	-0.0405109	-0.368979	-0.291649	0.488803
-4.27747	-0.336147	-0.40632	0.0361371	0.0157596	-0.133389	-0.0693291	-0.577071	0.187492	-0.493257	-0.138056	0.0726749	-0.63488	-0.240118	0.394663	0.241295	-0.418349	-0.320398	-0.210574	-0.246355	-0.381782	0.269553	0.0410675	0.41252	-0.295981	0.0824211	0.129397	-0.142481	0.00565323	-0.0295597	-0.526244	-0.465868	-0.015258	-0.0780989	-0.0333673	-0.560155	0.379163	-0.0101157	0.299584	0.0737891	-0.211602	-0.379329	0.162996	-0.218252	-0.231275	0.0735567	-0.0408524	-0.368583	-0.290811	0.490253
-4.27648	-0.337339	-0.403566	0.0352381	0.0168809	-0.134884	-0.0697097	-0.57918	0.185837	-0.49481	-0.138296	0.0716017	-0.634265	-0.241203	0.394593	0.240176	-0.41972	-0.321159	-0.210269	-0.246714	-0.381918	0.268981	0.0443064	0.413799	-0.296672	0.0830913	0.129421	-0.142616	0.00484782	-0.0303803	-0.525122	-0.467062	-0.0143415	-0.0787106	-0.0326119	-0.55965	0.377914	-0.00984831	0.298776	0.0721155	-0.211104	-0.376838	0.16424	-0.219304	-0.230623	0.0746158	-0.0411909	-0.368184	-0.289966	0.491698
-4.2755	-0.338527	-0.400813	0.0343357	0.0180046	-0.136378	-0.0701066	-0.581277	0.184187	-0.496361	-0.138537	0.0705262	-0.633649	-0.242293	0.394521	0.239055	-0.421078	-0.321914	-0.209966	-0.247073	-0.382056	0.268407	0.0475359	0.415073	-0.297367	0.0837642	0.12943	-0.142753	0.00405261	-0.0312001	-0.524005	-0.468254	-0.0134339	-0.0793301	-0.0318553	-0.559126	0.376659	-0.00958428	0.297973	0.0704275	-0.210616	-0.374343	0.165474	-0.220367	-0.229965	0.075671	-0.0415262	-0.367781	-0.289115	0.493138
-4.27452	-0.339709	-0.398061	0.0334299	0.0191307	-0.13787	-0.0705199	-0.583362	0.182543	-0.497911	-0.138777	0.0694487	-0.633032	-0.243387	0.394449	0.237931	-0.422424	-0.322663	-0.209667	-0.24743	-0.382194	0.267831	0.0507557	0.416343	-0.298066	0.0844398	0.129425	-0.142892	0.00326764	-0.0320193	-0.522891	-0.469443	-0.0125351	-0.0799574	-0.0310978	-0.558583	0.375396	-0.00932365	0.297176	0.0687252	-0.21014	-0.371843	0.166699	-0.22144	-0.229302	0.0767222	-0.0418586	-0.367376	-0.288257	0.494572
-4.27353	-0.340886	-0.395311	0.0325208	0.020259	-0.139361	-0.0709495	-0.585434	0.180904	-0.499459	-0.139017	0.068369	-0.632412	-0.244485	0.394376	0.236804	-0.423759	-0.323406	-0.20937	-0.247786	-0.382334	0.267251	0.0539656	0.417608	-0.29877	0.085118	0.129405	-0.143032	0.00249297	-0.0328378	-0.521782	-0.470631	-0.0116453	-0.0805925	-0.0303395	-0.558022	0.374127	-0.00906651	0.296385	0.067009	-0.209675	-0.369339	0.167913	-0.222525	-0.228633	0.0777693	-0.0421878	-0.366967	-0.287392	0.496001
-4.27255	-0.342058	-0.392563	0.0316083	0.0213892	-0.14085	-0.0713956	-0.587495	0.179272	-0.501005	-0.139257	0.0672874	-0.631791	-0.245588	0.394302	0.235675	-0.425081	-0.324142	-0.209076	-0.248141	-0.382474	0.26667	0.0571653	0.418869	-0.299478	0.0857989	0.12937	-0.143175	0.00172864	-0.0336555	-0.520677	-0.471817	-0.0107644	-0.0812354	-0.0295804	-0.557442	0.37285	-0.00881294	0.295601	0.065279	-0.20922	-0.366831	0.169117	-0.223621	-0.22796	0.0788124	-0.0425141	-0.366556	-0.286521	0.497424
-4.27157	-0.343224	-0.389817	0.0306926	0.0225214	-0.142337	-0.0718582	-0.589542	0.177646	-0.502549	-0.139497	0.0662038	-0.631168	-0.246694	0.394228	0.234543	-0.426391	-0.324872	-0.208784	-0.248496	-0.382616	0.266086	0.0603548	0.420125	-0.30019	0.0864826	0.129321	-0.14332	0.000974694	-0.0344724	-0.519577	-0.473001	-0.00989246	-0.0818861	-0.0288208	-0.556844	0.371566	-0.00856303	0.294823	0.0635353	-0.208776	-0.364319	0.170311	-0.224727	-0.227281	0.0798515	-0.0428372	-0.366141	-0.285643	0.498841
-4.27058	-0.344384	-0.387072	0.0297737	0.0236552	-0.143822	-0.0723371	-0.591578	0.176026	-0.504091	-0.139737	0.0651183	-0.630544	-0.247803	0.394153	0.23341	-0.427689	-0.325596	-0.208496	-0.248849	-0.382758	0.2655	0.0635337	0.421377	-0.300907	0.0871689	0.129256	-0.143466	0.00023117	-0.0352885	-0.518481	-0.474182	-0.00902949	-0.0825447	-0.0280607	-0.556228	0.370275	-0.00831687	0.294051	0.0617782	-0.208343	-0.361803	0.171494	-0.225843	-0.226597	0.0808865	-0.0431574	-0.365723	-0.284758	0.500252
-4.2696	-0.345538	-0.384329	0.0288515	0.0247906	-0.145305	-0.0728326	-0.5936	0.174413	-0.505631	-0.139977	0.064031	-0.629918	-0.248916	0.394077	0.232274	-0.428974	-0.326313	-0.20821	-0.249202	-0.382902	0.264912	0.0667018	0.422623	-0.301628	0.087858	0.129176	-0.143615	-0.000501891	-0.0361037	-0.517389	-0.475361	-0.00817551	-0.0832111	-0.0273003	-0.555592	0.368977	-0.00807455	0.293285	0.0600079	-0.207921	-0.359284	0.172668	-0.22697	-0.225907	0.0819174	-0.0434746	-0.365302	-0.283868	0.501656
-4.26862	-0.346686	-0.381587	0.0279262	0.0259275	-0.146785	-0.0733445	-0.595611	0.172806	-0.507168	-0.140216	0.062942	-0.62929	-0.250032	0.394	0.231135	-0.430247	-0.327024	-0.207927	-0.249554	-0.383046	0.264322	0.069859	0.423866	-0.302354	0.0885499	0.129081	-0.143767	-0.00122445	-0.036918	-0.516302	-0.476537	-0.00733054	-0.0838854	-0.0265397	-0.554939	0.367672	-0.00783615	0.292526	0.0582246	-0.207508	-0.356761	0.173831	-0.228108	-0.225213	0.0829443	-0.0437888	-0.364878	-0.28297	0.503055
-4.26764	-0.347828	-0.378847	0.0269978	0.0270655	-0.148263	-0.073873	-0.597608	0.171206	-0.508704	-0.140456	0.0618513	-0.62866	-0.251151	0.393923	0.229995	-0.431507	-0.327729	-0.207646	-0.249905	-0.383191	0.26373	0.0730049	0.425103	-0.303084	0.0892445	0.128971	-0.14392	-0.00193648	-0.0377313	-0.51522	-0.477711	-0.00649458	-0.0845676	-0.025779	-0.554267	0.36636	-0.00760176	0.291774	0.0564285	-0.207107	-0.354234	0.174985	-0.229255	-0.224513	0.0839671	-0.0440999	-0.364451	-0.282066	0.504447
-4.26665	-0.348963	-0.376108	0.0260663	0.0282047	-0.149738	-0.0744179	-0.599593	0.169612	-0.510236	-0.140695	0.060759	-0.628028	-0.252273	0.393845	0.228853	-0.432754	-0.328428	-0.207369	-0.250255	-0.383337	0.263137	0.0761395	0.426335	-0.303819	0.0899419	0.128846	-0.144076	-0.00263793	-0.0385435	-0.514142	-0.478882	-0.00566765	-0.0852576	-0.0250185	-0.553576	0.365041	-0.00737147	0.291028	0.0546197	-0.206716	-0.351705	0.176128	-0.230413	-0.223808	0.0849858	-0.0444082	-0.364021	-0.281156	0.505832
-4.26567	-0.350091	-0.373371	0.0251317	0.0293447	-0.15121	-0.0749793	-0.601564	0.168026	-0.511766	-0.140935	0.0596651	-0.627394	-0.253397	0.393767	0.227709	-0.433988	-0.32912	-0.207094	-0.250605	-0.383484	0.262542	0.0792625	0.427563	-0.304558	0.090642	0.128705	-0.144234	-0.00332878	-0.0393548	-0.513069	-0.48005	-0.00484976	-0.0859555	-0.0242581	-0.552868	0.363716	-0.00714536	0.290288	0.0527985	-0.206335	-0.349172	0.177261	-0.23158	-0.223097	0.0860004	-0.0447134	-0.363587	-0.28024	0.50721
-4.26469	-0.351213	-0.370636	0.0241942	0.0304856	-0.15268	-0.0755573	-0.603523	0.166446	-0.513294	-0.141174	0.0585698	-0.626758	-0.254524	0.393688	0.226563	-0.435208	-0.329805	-0.206822	-0.250954	-0.383631	0.261946	0.0823736	0.428786	-0.305303	0.0913449	0.128549	-0.144395	-0.00400901	-0.040165	-0.512002	-0.481215	-0.00404093	-0.0866613	-0.0234981	-0.552141	0.362384	-0.00692353	0.289556	0.0509651	-0.205965	-0.346636	0.178384	-0.232757	-0.222382	0.0870108	-0.0450157	-0.363151	-0.279317	0.508582
-4.2637	-0.352327	-0.367901	0.0232536	0.031627	-0.154146	-0.0761517	-0.605469	0.164873	-0.514818	-0.141413	0.0574731	-0.62612	-0.255652	0.393609	0.225416	-0.436416	-0.330485	-0.206552	-0.251302	-0.383779	0.261348	0.0854727	0.430003	-0.306052	0.0920507	0.128377	-0.144558	-0.00467857	-0.040974	-0.510939	-0.482376	-0.00324116	-0.087375	-0.0227386	-0.551396	0.361045	-0.00670606	0.28883	0.0491196	-0.205605	-0.344097	0.179496	-0.233944	-0.221661	0.0880171	-0.0453151	-0.36271	-0.278387	0.509946
-4.26272	-0.353434	-0.365169	0.0223102	0.0327688	-0.155609	-0.0767627	-0.607402	0.163308	-0.51634	-0.141652	0.0563751	-0.62548	-0.256783	0.39353	0.224267	-0.43761	-0.331157	-0.206285	-0.25165	-0.383928	0.26075	0.0885595	0.431216	-0.306805	0.0927592	0.128189	-0.144724	-0.00533745	-0.0417819	-0.509881	-0.483535	-0.00245047	-0.0880965	-0.0219797	-0.550633	0.359699	-0.00649303	0.288111	0.0472623	-0.205255	-0.341556	0.180599	-0.23514	-0.220935	0.0890193	-0.0456116	-0.362267	-0.277452	0.511303
-4.26174	-0.354534	-0.362437	0.0213639	0.0339109	-0.157068	-0.0773902	-0.609322	0.16175	-0.517858	-0.141892	0.0552757	-0.624838	-0.257915	0.39345	0.223116	-0.438791	-0.331824	-0.206021	-0.251997	-0.384077	0.26015	0.091634	0.432424	-0.307564	0.0934706	0.127986	-0.144892	-0.00598562	-0.0425886	-0.508828	-0.48469	-0.00166886	-0.088826	-0.0212216	-0.549852	0.358346	-0.00628454	0.2874	0.0453934	-0.204915	-0.339012	0.181692	-0.236346	-0.220204	0.0900172	-0.0459051	-0.361821	-0.27651	0.512653
-4.26075	-0.355627	-0.359708	0.0204148	0.0350531	-0.158524	-0.0780342	-0.611228	0.1602	-0.519374	-0.142131	0.0541753	-0.624194	-0.259048	0.39337	0.221964	-0.439958	-0.332484	-0.205759	-0.252344	-0.384227	0.259549	0.0946957	0.433626	-0.308327	0.0941848	0.127767	-0.145063	-0.00662305	-0.0433941	-0.507781	-0.485841	-0.000896351	-0.0895633	-0.0204643	-0.549052	0.356987	-0.00608066	0.286695	0.0435131	-0.204585	-0.336466	0.182774	-0.23756	-0.219468	0.091011	-0.0461958	-0.361371	-0.275562	0.513995
-4.25977	-0.356711	-0.356979	0.0194629	0.0361952	-0.159976	-0.0786947	-0.613122	0.158657	-0.520886	-0.14237	0.0530736	-0.623548	-0.260183	0.393289	0.220811	-0.441111	-0.333138	-0.2055	-0.252691	-0.384378	0.258948	0.0977446	0.434824	-0.309095	0.0949019	0.127532	-0.145237	-0.00724973	-0.0441982	-0.506738	-0.486989	-0.000132937	-0.0903085	-0.0197081	-0.548235	0.355621	-0.00588149	0.285997	0.0416216	-0.204266	-0.333918	0.183846	-0.238784	-0.218726	0.0920006	-0.0464835	-0.360917	-0.274607	0.515329
-4.25879	-0.357788	-0.354252	0.0185082	0.037337	-0.161425	-0.0793716	-0.615002	0.157122	-0.522394	-0.142609	0.051971	-0.6229	-0.261318	0.393208	0.219656	-0.442251	-0.333785	-0.205243	-0.253037	-0.384529	0.258346	0.10078	0.436016	-0.309868	0.0956217	0.127282	-0.145414	-0.00786564	-0.0450011	-0.505702	-0.488133	0.000621372	-0.0910617	-0.018953	-0.5474	0.354249	-0.00568712	0.285306	0.039719	-0.203956	-0.331367	0.184908	-0.240017	-0.217979	0.0929859	-0.0467685	-0.360461	-0.273647	0.516656
-4.2578	-0.358857	-0.351526	0.0175509	0.0384785	-0.162869	-0.0800651	-0.616869	0.155595	-0.523899	-0.142849	0.0508674	-0.622249	-0.262455	0.393128	0.2185	-0.443376	-0.334426	-0.204989	-0.253382	-0.384681	0.257743	0.103803	0.437203	-0.310646	0.0963445	0.127015	-0.145594	-0.00847076	-0.0458026	-0.50467	-0.489273	0.00136657	-0.0918227	-0.0181993	-0.546547	0.352871	-0.00549762	0.284622	0.0378056	-0.203656	-0.328814	0.18596	-0.241258	-0.217227	0.093967	-0.0470505	-0.360001	-0.27268	0.517974
-4.25682	-0.359917	-0.348802	0.0165909	0.0396193	-0.164309	-0.0807749	-0.618723	0.154076	-0.5254	-0.143088	0.0497629	-0.621596	-0.263592	0.393047	0.217344	-0.444488	-0.33506	-0.204738	-0.253727	-0.384833	0.25714	0.106812	0.438385	-0.311429	0.0970701	0.126732	-0.145777	-0.00906508	-0.0466028	-0.503644	-0.490409	0.00210265	-0.0925917	-0.017447	-0.545676	0.351485	-0.00531308	0.283946	0.0358816	-0.203366	-0.32626	0.187002	-0.242508	-0.21647	0.0949438	-0.0473298	-0.359537	-0.271708	0.519285
-4.25584	-0.36097	-0.346079	0.0156283	0.0407593	-0.165745	-0.0815013	-0.620563	0.152564	-0.526898	-0.143328	0.0486575	-0.620941	-0.264729	0.392966	0.216186	-0.445586	-0.335688	-0.204489	-0.254072	-0.384986	0.256536	0.109808	0.439561	-0.312217	0.0977986	0.126434	-0.145963	-0.00964859	-0.0474015	-0.502624	-0.491541	0.00282962	-0.0933685	-0.0166962	-0.544788	0.350094	-0.00513359	0.283277	0.0339472	-0.203086	-0.323704	0.188034	-0.243767	-0.215708	0.0959163	-0.0476062	-0.359071	-0.270729	0.520587
-4.25486	-0.362013	-0.343357	0.0146632	0.0418984	-0.167177	-0.082244	-0.622389	0.151061	-0.528391	-0.143567	0.0475514	-0.620283	-0.265867	0.392885	0.215027	-0.446669	-0.33631	-0.204242	-0.254417	-0.385139	0.255933	0.112789	0.440732	-0.313009	0.09853	0.126119	-0.146152	-0.0102213	-0.0481987	-0.501609	-0.492669	0.00354746	-0.0941532	-0.0159472	-0.543882	0.348696	-0.00495923	0.282615	0.0320027	-0.202815	-0.321146	0.189055	-0.245034	-0.21494	0.0968845	-0.0478798	-0.3586	-0.269744	0.521881
-4.25387	-0.363048	-0.340637	0.0136955	0.0430363	-0.168604	-0.0830032	-0.624202	0.149566	-0.529881	-0.143807	0.0464446	-0.619623	-0.267004	0.392804	0.213867	-0.447738	-0.336925	-0.203998	-0.254761	-0.385293	0.255329	0.115757	0.441898	-0.313807	0.0992642	0.125788	-0.146344	-0.0107831	-0.0489944	-0.5006	-0.493792	0.00425618	-0.0949459	-0.0152	-0.542958	0.347292	-0.00479009	0.28196	0.0300481	-0.202554	-0.318587	0.190067	-0.246309	-0.214168	0.0978484	-0.0481507	-0.358127	-0.268754	0.523166
-4.25289	-0.364075	-0.337917	0.0127255	0.0441729	-0.170026	-0.0837787	-0.626002	0.148079	-0.531366	-0.144047	0.0453373	-0.618961	-0.268142	0.392722	0.212707	-0.448792	-0.337533	-0.203756	-0.255105	-0.385447	0.254725	0.11871	0.443059	-0.31461	0.100001	0.125441	-0.146539	-0.0113341	-0.0497886	-0.499596	-0.494911	0.00495578	-0.0957464	-0.0144549	-0.542017	0.345881	-0.00462625	0.281313	0.0280837	-0.202302	-0.316027	0.191068	-0.247592	-0.21339	0.098808	-0.0484188	-0.35765	-0.267757	0.524443
-4.25191	-0.365092	-0.335199	0.011753	0.045308	-0.171443	-0.0845706	-0.627788	0.146601	-0.532847	-0.144287	0.0442294	-0.618296	-0.269279	0.392642	0.211546	-0.449832	-0.338135	-0.203517	-0.255449	-0.385601	0.254122	0.121649	0.444214	-0.315418	0.100741	0.125077	-0.146738	-0.0118742	-0.0505812	-0.498598	-0.496025	0.00564626	-0.0965548	-0.0137118	-0.541058	0.344465	-0.0044678	0.280673	0.0261097	-0.20206	-0.313466	0.192059	-0.248883	-0.212607	0.0997631	-0.0486841	-0.357169	-0.266754	0.525711
-4.25092	-0.3661	-0.332483	0.0107782	0.0464415	-0.172856	-0.0853788	-0.62956	0.145132	-0.534324	-0.144528	0.043121	-0.617629	-0.270415	0.392561	0.210384	-0.450858	-0.338731	-0.20328	-0.255793	-0.385756	0.253518	0.124573	0.445363	-0.316231	0.101484	0.124698	-0.14694	-0.0124035	-0.0513722	-0.497607	-0.497135	0.00632761	-0.0973711	-0.012971	-0.540083	0.343042	-0.00431482	0.280041	0.0241264	-0.201828	-0.310904	0.19304	-0.250182	-0.211819	0.100714	-0.0489467	-0.356685	-0.265746	0.52697
-4.24994	-0.367099	-0.329767	0.00980109	0.0475731	-0.174263	-0.0862033	-0.631319	0.143671	-0.535796	-0.144768	0.0420123	-0.616959	-0.27155	0.39248	0.209222	-0.451869	-0.33932	-0.203045	-0.256137	-0.385911	0.252916	0.127483	0.446507	-0.317049	0.10223	0.124302	-0.147145	-0.012922	-0.0521616	-0.496621	-0.498239	0.00699985	-0.0981953	-0.0122326	-0.53909	0.341613	-0.00416739	0.279416	0.0221339	-0.201604	-0.308341	0.194011	-0.251489	-0.211026	0.10166	-0.0492066	-0.356197	-0.264731	0.52822
-4.24896	-0.368088	-0.327052	0.00882176	0.0487026	-0.175665	-0.087044	-0.633064	0.142218	-0.537263	-0.145009	0.0409032	-0.616287	-0.272684	0.3924	0.208059	-0.452865	-0.339903	-0.202812	-0.25648	-0.386066	0.252313	0.130377	0.447646	-0.317872	0.102979	0.123889	-0.147354	-0.0134296	-0.0529492	-0.495641	-0.499339	0.00766296	-0.0990274	-0.0114968	-0.53808	0.340178	-0.0040256	0.278799	0.0201324	-0.20139	-0.305777	0.194972	-0.252803	-0.210228	0.102602	-0.0494637	-0.355706	-0.263711	0.529461
-4.24797	-0.369068	-0.324339	0.00784024	0.0498299	-0.177062	-0.087901	-0.634795	0.140775	-0.538726	-0.14525	0.039794	-0.615612	-0.273817	0.39232	0.206896	-0.453846	-0.340479	-0.202582	-0.256823	-0.386222	0.251712	0.133256	0.448779	-0.3187	0.103731	0.12346	-0.147566	-0.0139263	-0.0537351	-0.494667	-0.500434	0.00831697	-0.0998674	-0.0107637	-0.537053	0.338737	-0.00388952	0.27819	0.0181222	-0.201185	-0.303212	0.195923	-0.254124	-0.209424	0.10354	-0.0497182	-0.355212	-0.262685	0.530692
-4.24699	-0.370038	-0.321627	0.0068566	0.0509548	-0.178453	-0.0887741	-0.636512	0.13934	-0.540184	-0.145492	0.0386846	-0.614934	-0.274948	0.39224	0.205733	-0.454812	-0.341049	-0.202354	-0.257167	-0.386378	0.251111	0.13612	0.449906	-0.319533	0.104486	0.123015	-0.147783	-0.0144122	-0.0545193	-0.493699	-0.501524	0.00896186	-0.100715	-0.0100333	-0.536009	0.33729	-0.00375924	0.277588	0.0161034	-0.200989	-0.300648	0.196864	-0.255453	-0.208616	0.104473	-0.0499701	-0.354714	-0.261654	0.531915
-4.24601	-0.370999	-0.318916	0.00587088	0.0520771	-0.179839	-0.0896634	-0.638216	0.137915	-0.541637	-0.145734	0.0375751	-0.614254	-0.276078	0.39216	0.204569	-0.455763	-0.341613	-0.202128	-0.25751	-0.386534	0.250511	0.138968	0.451028	-0.320372	0.105243	0.122553	-0.148002	-0.0148873	-0.0553016	-0.492737	-0.502608	0.00959765	-0.101571	-0.00930598	-0.534948	0.335837	-0.00363485	0.276993	0.0140763	-0.200802	-0.298083	0.197795	-0.256788	-0.207803	0.105401	-0.0502193	-0.354212	-0.260616	0.533127
-4.24503	-0.371949	-0.316206	0.00488315	0.0531966	-0.181219	-0.0905688	-0.639905	0.136498	-0.543084	-0.145976	0.0364656	-0.613571	-0.277206	0.392081	0.203406	-0.456699	-0.34217	-0.201904	-0.257853	-0.38669	0.249912	0.1418	0.452144	-0.321215	0.106004	0.122074	-0.148226	-0.0153515	-0.0560822	-0.491782	-0.503687	0.0102243	-0.102434	-0.00858173	-0.53387	0.334378	-0.00351641	0.276407	0.012041	-0.200624	-0.295518	0.198715	-0.258131	-0.206984	0.106325	-0.0504659	-0.353707	-0.259573	0.53433
-4.24404	-0.372889	-0.313497	0.00389347	0.0543131	-0.182593	-0.0914903	-0.641581	0.135091	-0.544527	-0.146219	0.0353562	-0.612886	-0.278331	0.392003	0.202242	-0.45762	-0.34272	-0.201682	-0.258196	-0.386846	0.249314	0.144617	0.453255	-0.322064	0.106767	0.121579	-0.148453	-0.0158049	-0.0568608	-0.490833	-0.504761	0.010842	-0.103306	-0.00786072	-0.532776	0.332913	-0.00340402	0.275828	0.00999777	-0.200454	-0.292953	0.199626	-0.25948	-0.206161	0.107244	-0.0507098	-0.353198	-0.258525	0.535523
-4.24306	-0.373819	-0.31079	0.00290188	0.0554265	-0.183961	-0.0924278	-0.643243	0.133693	-0.545964	-0.146462	0.0342469	-0.612198	-0.279455	0.391924	0.201078	-0.458526	-0.343264	-0.201463	-0.258539	-0.387002	0.248717	0.147417	0.45436	-0.322918	0.107534	0.121068	-0.148684	-0.0162475	-0.0576375	-0.48989	-0.505828	0.0114505	-0.104185	-0.0071431	-0.531665	0.331443	-0.00329776	0.275257	0.00794684	-0.200294	-0.290388	0.200526	-0.260836	-0.205332	0.108159	-0.0509512	-0.352685	-0.257471	0.536706
-4.24208	-0.374738	-0.308083	0.00190846	0.0565365	-0.185322	-0.0933812	-0.644891	0.132304	-0.547395	-0.146705	0.0331379	-0.611507	-0.280575	0.391847	0.199915	-0.459416	-0.343802	-0.201245	-0.258882	-0.387158	0.248122	0.150201	0.455459	-0.323777	0.108303	0.12054	-0.148919	-0.0166793	-0.0584123	-0.488953	-0.506891	0.0120499	-0.105072	-0.006429	-0.530538	0.329966	-0.00319769	0.274693	0.00588839	-0.200142	-0.287824	0.201417	-0.262198	-0.204499	0.109069	-0.05119	-0.352169	-0.256411	0.53788
-4.24109	-0.375647	-0.305377	0.000913251	0.057643	-0.186678	-0.0943506	-0.646524	0.130925	-0.548821	-0.146949	0.0320292	-0.610813	-0.281693	0.39177	0.198752	-0.460291	-0.344333	-0.201029	-0.259226	-0.387314	0.247528	0.152969	0.456552	-0.324641	0.109075	0.119995	-0.149158	-0.0171003	-0.0591851	-0.488023	-0.507947	0.0126403	-0.105967	-0.00571856	-0.529395	0.328484	-0.00310391	0.274137	0.00382263	-0.199998	-0.28526	0.202297	-0.263567	-0.203661	0.109974	-0.0514263	-0.351649	-0.255346	0.539043
-4.24011	-0.376545	-0.302672	-8.3675e-05	0.0587457	-0.188027	-0.0953358	-0.648144	0.129555	-0.550241	-0.147194	0.0309208	-0.610116	-0.282808	0.391693	0.197588	-0.46115	-0.344858	-0.200816	-0.259569	-0.387471	0.246936	0.15572	0.45764	-0.325511	0.109851	0.119433	-0.149402	-0.0175105	-0.0599559	-0.487099	-0.508998	0.0132216	-0.10687	-0.00501193	-0.528235	0.326997	-0.00301649	0.27359	0.00174976	-0.199864	-0.282697	0.203168	-0.264942	-0.202817	0.110875	-0.05166	-0.351126	-0.254275	0.540195
-4.23913	-0.377432	-0.299969	-0.00108226	0.0598445	-0.18937	-0.0963368	-0.64975	0.128195	-0.551655	-0.147439	0.0298129	-0.609417	-0.28392	0.391618	0.196426	-0.461994	-0.345377	-0.200604	-0.259912	-0.387627	0.246345	0.158454	0.458722	-0.326385	0.110629	0.118855	-0.149649	-0.0179101	-0.0607246	-0.486182	-0.510042	0.0137939	-0.10778	-0.00430924	-0.527059	0.325504	-0.0029355	0.27305	-0.000329995	-0.199737	-0.280134	0.204028	-0.266322	-0.201969	0.111771	-0.0518912	-0.350599	-0.2532	0.541338
-4.23814	-0.378308	-0.297266	-0.00208244	0.0609392	-0.190706	-0.0973536	-0.651342	0.126844	-0.553063	-0.147685	0.0287056	-0.608714	-0.285029	0.391543	0.195263	-0.462823	-0.345889	-0.200394	-0.260256	-0.387783	0.245756	0.161171	0.459799	-0.327265	0.11141	0.11826	-0.1499	-0.0182989	-0.0614913	-0.485271	-0.51108	0.0143572	-0.108698	-0.00361064	-0.525868	0.324005	-0.00286103	0.272518	-0.00241644	-0.199619	-0.277573	0.204878	-0.267709	-0.201116	0.112662	-0.05212	-0.350068	-0.252118	0.54247
-4.23716	-0.379173	-0.294564	-0.00308416	0.0620295	-0.192035	-0.098386	-0.652919	0.125503	-0.554465	-0.147931	0.0275989	-0.608009	-0.286134	0.391468	0.194101	-0.463635	-0.346394	-0.200186	-0.260599	-0.387939	0.245169	0.16387	0.460869	-0.32815	0.112195	0.117649	-0.150156	-0.018677	-0.0622558	-0.484367	-0.512113	0.0149114	-0.109624	-0.00291626	-0.52466	0.322501	-0.00279315	0.271993	-0.00450936	-0.199509	-0.275012	0.205718	-0.269101	-0.200257	0.113549	-0.0523462	-0.349534	-0.251032	0.543591
-4.23618	-0.380027	-0.291864	-0.00408735	0.0631154	-0.193357	-0.0994341	-0.654483	0.124172	-0.55586	-0.148178	0.0264928	-0.607301	-0.287235	0.391395	0.19294	-0.464432	-0.346894	-0.19998	-0.260943	-0.388095	0.244585	0.166553	0.461934	-0.32904	0.112982	0.117021	-0.150416	-0.0190444	-0.0630181	-0.483469	-0.513138	0.0154566	-0.110558	-0.00222625	-0.523437	0.320991	-0.00273195	0.271477	-0.00660856	-0.199407	-0.272453	0.206549	-0.270499	-0.199394	0.11443	-0.05257	-0.348996	-0.24994	0.544702
-4.23519	-0.380869	-0.289164	-0.00509194	0.0641965	-0.194673	-0.100498	-0.656032	0.122851	-0.557249	-0.148426	0.0253875	-0.60659	-0.288332	0.391322	0.191779	-0.465213	-0.347387	-0.199775	-0.261287	-0.388251	0.244002	0.169218	0.462993	-0.329936	0.113772	0.116376	-0.15068	-0.0194012	-0.0637783	-0.482578	-0.514158	0.0159929	-0.1115	-0.00154074	-0.522198	0.319477	-0.00267748	0.270969	-0.00871382	-0.199313	-0.269895	0.207369	-0.271903	-0.198527	0.115307	-0.0527914	-0.348454	-0.248843	0.545801
-4.23421	-0.3817	-0.286465	-0.00609788	0.0652728	-0.195981	-0.101577	-0.657567	0.12154	-0.558632	-0.148674	0.0242831	-0.605876	-0.289425	0.391251	0.190619	-0.465979	-0.347873	-0.199572	-0.261631	-0.388406	0.243422	0.171865	0.464046	-0.330836	0.114565	0.115714	-0.150949	-0.0197474	-0.0645362	-0.481694	-0.51517	0.0165201	-0.112449	-0.000859882	-0.520944	0.317956	-0.00262983	0.270468	-0.0108249	-0.199227	-0.267339	0.208179	-0.273311	-0.197654	0.116179	-0.0530104	-0.347908	-0.24774	0.54689
-4.23323	-0.38252	-0.283767	-0.0071051	0.066344	-0.197282	-0.102671	-0.659088	0.120239	-0.560008	-0.148923	0.0231796	-0.605158	-0.290514	0.39118	0.18946	-0.466728	-0.348353	-0.199371	-0.261975	-0.388562	0.242844	0.174494	0.465093	-0.331742	0.115361	0.115036	-0.151222	-0.020083	-0.0652918	-0.480816	-0.516177	0.0170384	-0.113406	-0.000183805	-0.519674	0.316431	-0.00258908	0.269976	-0.0129417	-0.199149	-0.264784	0.208979	-0.274725	-0.196776	0.117046	-0.053227	-0.347359	-0.246633	0.547968
-4.23225	-0.383327	-0.28107	-0.00811353	0.0674099	-0.198576	-0.103781	-0.660595	0.118948	-0.561377	-0.149173	0.0220771	-0.604438	-0.291598	0.39111	0.188302	-0.467462	-0.348827	-0.199172	-0.262319	-0.388717	0.242268	0.177106	0.466134	-0.332653	0.11616	0.114341	-0.1515	-0.020408	-0.0660452	-0.479946	-0.517176	0.0175478	-0.11437	0.000487347	-0.518389	0.3149	-0.00255529	0.269491	-0.0150639	-0.199079	-0.262231	0.209769	-0.276143	-0.195894	0.117908	-0.0534412	-0.346806	-0.245521	0.549035
-4.23126	-0.384123	-0.278374	-0.0091231	0.0684703	-0.199862	-0.104907	-0.662088	0.117667	-0.562739	-0.149424	0.0209756	-0.603715	-0.292677	0.391041	0.187144	-0.468179	-0.349295	-0.198974	-0.262664	-0.388872	0.241695	0.179699	0.46717	-0.333569	0.116962	0.113629	-0.151782	-0.0207226	-0.0667962	-0.479082	-0.518169	0.0180482	-0.115343	0.00115343	-0.517089	0.313364	-0.00252854	0.269014	-0.0171914	-0.199016	-0.25968	0.21055	-0.277567	-0.195007	0.118765	-0.0536531	-0.346249	-0.244403	0.55009
-4.23028	-0.384907	-0.275679	-0.0101337	0.0695251	-0.201141	-0.106047	-0.663566	0.116397	-0.564094	-0.149676	0.0198753	-0.602989	-0.293751	0.390974	0.185987	-0.468881	-0.349756	-0.198777	-0.263009	-0.389026	0.241125	0.182274	0.468199	-0.33449	0.117768	0.1129	-0.152069	-0.0210266	-0.0675449	-0.478225	-0.519154	0.0185398	-0.116323	0.00181432	-0.515774	0.311823	-0.00250891	0.268546	-0.0193238	-0.198961	-0.257131	0.21132	-0.278994	-0.194115	0.119617	-0.0538627	-0.345689	-0.243281	0.551134
-4.2293	-0.385678	-0.272984	-0.0111454	0.070574	-0.202412	-0.107203	-0.665031	0.115137	-0.565442	-0.149928	0.0187762	-0.602259	-0.294821	0.390907	0.184832	-0.469566	-0.350211	-0.198582	-0.263353	-0.38918	0.240558	0.18483	0.469223	-0.335416	0.118576	0.112155	-0.15236	-0.0213203	-0.0682911	-0.477374	-0.520133	0.0190224	-0.11731	0.00246985	-0.514445	0.310277	-0.00249645	0.268085	-0.0214611	-0.198914	-0.254584	0.21208	-0.280427	-0.193219	0.120465	-0.0540699	-0.345125	-0.242153	0.552167
-4.22831	-0.386438	-0.270291	-0.012158	0.0716168	-0.203675	-0.108373	-0.666481	0.113887	-0.566782	-0.150182	0.0176784	-0.601527	-0.295884	0.390842	0.183677	-0.470236	-0.35066	-0.198389	-0.263698	-0.389334	0.239993	0.187368	0.470241	-0.336347	0.119387	0.111393	-0.152657	-0.0216035	-0.0690349	-0.476531	-0.521104	0.0194962	-0.118306	0.00311991	-0.5131	0.308726	-0.00249125	0.267632	-0.023603	-0.198874	-0.25204	0.21283	-0.281864	-0.192317	0.121307	-0.0542749	-0.344557	-0.241021	0.553188
-4.22733	-0.387185	-0.267598	-0.0131715	0.0726534	-0.20493	-0.109559	-0.667917	0.112647	-0.568115	-0.150436	0.016582	-0.600791	-0.296943	0.390777	0.182524	-0.470889	-0.351103	-0.198197	-0.264044	-0.389487	0.239432	0.189887	0.471253	-0.337284	0.120201	0.110615	-0.152958	-0.0218764	-0.0697762	-0.475695	-0.522069	0.0199611	-0.119309	0.00376434	-0.511741	0.30717	-0.00249337	0.267188	-0.0257494	-0.198841	-0.249498	0.213571	-0.283305	-0.191411	0.122143	-0.0544776	-0.343985	-0.239884	0.554198
-4.22635	-0.387919	-0.264906	-0.0141857	0.0736835	-0.206178	-0.110759	-0.669338	0.111418	-0.569441	-0.150692	0.0154871	-0.600052	-0.297995	0.390714	0.181372	-0.471526	-0.351539	-0.198006	-0.264389	-0.38964	0.238874	0.192387	0.472259	-0.338225	0.121018	0.109819	-0.153264	-0.022139	-0.0705151	-0.474865	-0.523026	0.0204171	-0.120319	0.00440301	-0.510368	0.305609	-0.00250288	0.266751	-0.0278999	-0.198815	-0.246958	0.214301	-0.28475	-0.190501	0.122975	-0.0546781	-0.343409	-0.238742	0.555196
-4.22536	-0.388641	-0.262215	-0.0152007	0.0747069	-0.207417	-0.111975	-0.670746	0.110199	-0.570759	-0.150949	0.0143936	-0.599311	-0.299042	0.390653	0.180221	-0.472147	-0.351969	-0.197816	-0.264735	-0.389793	0.238319	0.194868	0.473259	-0.339171	0.121838	0.109008	-0.153575	-0.0223913	-0.0712514	-0.474043	-0.523975	0.0208644	-0.121337	0.00503578	-0.50898	0.304043	-0.00251985	0.266322	-0.0300544	-0.198797	-0.244422	0.215022	-0.286198	-0.189586	0.123802	-0.0548764	-0.34283	-0.237595	0.556182
-4.22438	-0.389351	-0.259525	-0.0162164	0.0757236	-0.208648	-0.113205	-0.672139	0.108991	-0.572069	-0.151206	0.0133018	-0.598565	-0.300083	0.390592	0.179071	-0.472751	-0.352393	-0.197628	-0.265081	-0.389945	0.237767	0.197329	0.474253	-0.340123	0.122661	0.108179	-0.153891	-0.0226334	-0.0719851	-0.473228	-0.524917	0.0213029	-0.122363	0.00566251	-0.507579	0.302473	-0.00254434	0.265901	-0.0322127	-0.198785	-0.241888	0.215732	-0.287651	-0.188666	0.124623	-0.0550725	-0.342247	-0.236443	0.557156
-4.2234	-0.390047	-0.256836	-0.0172326	0.0767331	-0.209871	-0.11445	-0.673518	0.107794	-0.573371	-0.151465	0.0122117	-0.597817	-0.301117	0.390533	0.177923	-0.473339	-0.352811	-0.197441	-0.265427	-0.390096	0.237219	0.199772	0.475241	-0.341079	0.123487	0.107334	-0.154212	-0.0228654	-0.0727162	-0.47242	-0.525851	0.0217326	-0.123396	0.00628306	-0.506163	0.300897	-0.00257643	0.265488	-0.0343746	-0.198781	-0.239358	0.216433	-0.289107	-0.187742	0.125439	-0.0552664	-0.34166	-0.235287	0.558118
-4.22242	-0.390731	-0.254147	-0.0182494	0.0777355	-0.211086	-0.115709	-0.674882	0.106607	-0.574664	-0.151725	0.0111232	-0.597065	-0.302145	0.390476	0.176777	-0.473911	-0.353222	-0.197255	-0.265773	-0.390247	0.236674	0.202194	0.476223	-0.342041	0.124315	0.106472	-0.154538	-0.0230872	-0.0734447	-0.471618	-0.526778	0.0221536	-0.124437	0.00689729	-0.504734	0.299317	-0.00261618	0.265084	-0.0365398	-0.198783	-0.23683	0.217123	-0.290567	-0.186813	0.12625	-0.0554582	-0.341069	-0.234126	0.559068
-4.22143	-0.391401	-0.251459	-0.0192665	0.0787304	-0.212292	-0.116982	-0.676233	0.105431	-0.57595	-0.151987	0.0100367	-0.59631	-0.303166	0.39042	0.175632	-0.474467	-0.353628	-0.19707	-0.26612	-0.390397	0.236134	0.204597	0.4772	-0.343007	0.125147	0.105594	-0.154869	-0.023299	-0.0741705	-0.470824	-0.527697	0.0225659	-0.125485	0.00750507	-0.50329	0.297733	-0.00266365	0.264687	-0.0387083	-0.198792	-0.234306	0.217804	-0.292029	-0.185879	0.127055	-0.0556478	-0.340474	-0.232961	0.560006
-4.22045	-0.392059	-0.248772	-0.0202841	0.0797177	-0.213489	-0.118271	-0.677569	0.104266	-0.577227	-0.152249	0.00895198	-0.595552	-0.30418	0.390365	0.174488	-0.475006	-0.354027	-0.196887	-0.266466	-0.390547	0.235596	0.20698	0.47817	-0.343979	0.125982	0.104699	-0.155205	-0.0235008	-0.0748936	-0.470037	-0.528608	0.0229694	-0.12654	0.00810626	-0.501834	0.296144	-0.00271891	0.264298	-0.0408797	-0.198808	-0.231785	0.218475	-0.293495	-0.184941	0.127855	-0.0558353	-0.339876	-0.231791	0.560932
-4.21947	-0.392704	-0.246086	-0.0213019	0.0806972	-0.214678	-0.119573	-0.678891	0.103111	-0.578496	-0.152513	0.00786927	-0.594791	-0.305188	0.390312	0.173346	-0.475529	-0.35442	-0.196704	-0.266813	-0.390696	0.235063	0.209344	0.479135	-0.344955	0.12682	0.103788	-0.155547	-0.0236927	-0.0756139	-0.469258	-0.529511	0.0233643	-0.127603	0.00870072	-0.500364	0.29455	-0.00278202	0.263917	-0.0430539	-0.19883	-0.229268	0.219136	-0.294964	-0.183999	0.12865	-0.0560208	-0.339273	-0.230617	0.561846
-4.21848	-0.393335	-0.243401	-0.02232	0.0816686	-0.215858	-0.120889	-0.680198	0.101968	-0.579756	-0.152779	0.0067886	-0.594026	-0.306188	0.39026	0.172206	-0.476036	-0.354807	-0.196522	-0.26716	-0.390844	0.234534	0.211687	0.480093	-0.345936	0.127661	0.102861	-0.155894	-0.0238746	-0.0763315	-0.468485	-0.530406	0.0237506	-0.128674	0.00928831	-0.498881	0.292952	-0.00285304	0.263544	-0.0452306	-0.198858	-0.226755	0.219787	-0.296436	-0.183052	0.129439	-0.0562042	-0.338667	-0.229438	0.562747
-4.2175	-0.393952	-0.240716	-0.0233382	0.0826319	-0.217029	-0.12222	-0.681492	0.100835	-0.581007	-0.153045	0.00571005	-0.593258	-0.30718	0.39021	0.171068	-0.476526	-0.355188	-0.196341	-0.267508	-0.390992	0.234009	0.214009	0.481046	-0.346922	0.128504	0.101916	-0.156246	-0.0240468	-0.0770463	-0.46772	-0.531293	0.0241282	-0.129751	0.0098689	-0.497385	0.291349	-0.00293204	0.263178	-0.0474097	-0.198893	-0.224245	0.220428	-0.29791	-0.182101	0.130222	-0.0563856	-0.338057	-0.228255	0.563635
-4.21652	-0.394557	-0.238033	-0.0243564	0.0835867	-0.218191	-0.123564	-0.682771	0.0997132	-0.582249	-0.153313	0.0046337	-0.592486	-0.308166	0.390162	0.169931	-0.476999	-0.355563	-0.196162	-0.267855	-0.391139	0.233488	0.216312	0.481993	-0.347913	0.129351	0.100956	-0.156604	-0.0242092	-0.0777583	-0.466961	-0.532171	0.0244973	-0.130837	0.0104423	-0.495876	0.289742	-0.00301906	0.262821	-0.0495909	-0.198935	-0.22174	0.221059	-0.299387	-0.181146	0.131001	-0.0565649	-0.337443	-0.227068	0.564511
-4.21553	-0.395147	-0.23535	-0.0253747	0.084533	-0.219344	-0.124923	-0.684036	0.0986024	-0.583483	-0.153583	0.0035596	-0.591712	-0.309143	0.390115	0.168797	-0.477456	-0.355932	-0.195982	-0.268203	-0.391285	0.232972	0.218594	0.482934	-0.348908	0.130201	0.0999793	-0.156967	-0.0243619	-0.0784674	-0.46621	-0.533042	0.0248578	-0.131929	0.0110085	-0.494355	0.288131	-0.00311418	0.262472	-0.0517741	-0.198982	-0.219238	0.221681	-0.300866	-0.180186	0.131773	-0.0567423	-0.336825	-0.225876	0.565375
-4.21455	-0.395725	-0.232668	-0.0263928	0.0854705	-0.220488	-0.126295	-0.685287	0.0975025	-0.584707	-0.153854	0.00248784	-0.590933	-0.310112	0.390071	0.167664	-0.477897	-0.356295	-0.195804	-0.26855	-0.391431	0.23246	0.220855	0.483868	-0.349909	0.131053	0.0989863	-0.157336	-0.0245051	-0.0791737	-0.465467	-0.533903	0.0252098	-0.133029	0.0115673	-0.492821	0.286516	-0.00321745	0.26213	-0.0539591	-0.199036	-0.216741	0.222292	-0.302347	-0.179222	0.13254	-0.0569177	-0.336204	-0.224681	0.566225
-4.21357	-0.396288	-0.229986	-0.0274108	0.0863989	-0.221623	-0.127681	-0.686524	0.0964137	-0.585921	-0.154127	0.00141848	-0.590152	-0.311074	0.390027	0.166533	-0.478321	-0.356652	-0.195626	-0.268898	-0.391575	0.231952	0.223096	0.484797	-0.350914	0.131909	0.0979771	-0.15771	-0.0246386	-0.079877	-0.46473	-0.534757	0.0255533	-0.134136	0.0121185	-0.491274	0.284897	-0.00332893	0.261797	-0.0561456	-0.199095	-0.214249	0.222894	-0.30383	-0.178254	0.133301	-0.0570912	-0.335578	-0.223481	0.567063
-4.21258	-0.396837	-0.227306	-0.0284285	0.0873182	-0.222748	-0.12908	-0.687747	0.0953359	-0.587127	-0.154401	0.000351595	-0.589367	-0.312027	0.389986	0.165405	-0.478729	-0.357004	-0.195449	-0.269246	-0.391719	0.231449	0.225315	0.48572	-0.351923	0.132767	0.0969517	-0.158089	-0.0247627	-0.0805773	-0.464001	-0.535602	0.0258883	-0.13525	0.012662	-0.489716	0.283273	-0.00344867	0.261471	-0.0583334	-0.19916	-0.21176	0.223486	-0.305315	-0.177281	0.134057	-0.0572628	-0.334949	-0.222276	0.567889
-4.2116	-0.397373	-0.224626	-0.0294459	0.0882282	-0.223864	-0.130493	-0.688955	0.0942692	-0.588323	-0.154677	-0.00071274	-0.588579	-0.312972	0.389947	0.164278	-0.47912	-0.357349	-0.195273	-0.269594	-0.391862	0.230951	0.227514	0.486638	-0.352938	0.133629	0.0959102	-0.158475	-0.0248774	-0.0812747	-0.463279	-0.536438	0.0262148	-0.136372	0.0131978	-0.488146	0.281645	-0.00357673	0.261153	-0.0605224	-0.199231	-0.209277	0.224068	-0.306802	-0.176304	0.134806	-0.0574324	-0.334316	-0.221068	0.568701
-4.21062	-0.397895	-0.221947	-0.0304628	0.0891286	-0.224971	-0.131919	-0.690149	0.0932137	-0.589509	-0.154955	-0.00177446	-0.587787	-0.313908	0.389909	0.163153	-0.479495	-0.357688	-0.195097	-0.269943	-0.392004	0.230457	0.229692	0.487549	-0.353957	0.134493	0.0948526	-0.158866	-0.0249827	-0.081969	-0.462565	-0.537265	0.026533	-0.1375	0.0137255	-0.486563	0.280014	-0.00371317	0.260843	-0.0627123	-0.199308	-0.206798	0.22464	-0.30829	-0.175324	0.13555	-0.0576002	-0.333678	-0.219856	0.5695
[truncated: 14,455 more rows]
[truncated: 71 more columns]

## Sheet: Figure 3B Bottom
Time from infusion onset (s)	Dopamine Release (z-score)
	Unpaired																				Paired
	CD										TD										CD											TD
[truncated: 154 more rows]

## Sheet: Figure 3B Insets
Subject ID	Treatment	Dopamine Release Response (mean z-score)
		CD	TD
CTA002	Unpaired	1.00647	0.928655
CTA010	Unpaired	1.15867	1.27598
[truncated: 19 more rows]

## Sheet: Figure 3C
Subject	Treatment	Trial	Dopamine Release Response (mean z-score)
[truncated: 630 more rows]

[truncated: 6 more sheets: Figure 3D, Figure 3G Top, Figure 3G Bottom, Figure 3G Insets, Figure 3H, Figure 3I]
