# Supplementary material for: Dopamine activity encodes the changing valence of the same stimulus in conditioned taste aversion paradigms
Source: eLife. 2025 Mar 5;13:RP103260. doi: 10.7554/eLife.103260 (PMC11882140; doi:10.7554/eLife.103260)
Supplement: Figure 4—source data 1. [file elife-103260-fig4-data1.xlsx]

## Sheet: Figure 2A
Subject ID	Treatment	Normalized Nose Movement [Infusion - Preinfusion Movement(cm)]
		CD	TD
CTA002	Unpaired	NaN	NaN
CTA010	Unpaired	-7.46118	-10.9069
CTA011	Unpaired	-18.091	-7.4771
CTA016	Unpaired	-14.7765	-14.597
CTA023	Unpaired	-2.0994	-3.12997
CTA036	Unpaired	-11.1046	0.196169
CTA040	Unpaired	-1.49037	1.54641
CTA042	Unpaired	-7.21808	-13.4718
CTA043	Unpaired	-0.106379	0.404698
CTA047	Unpaired	-2.4204	-10.0064
CTA007	Paired	-10.4914	7.12821
CTA014	Paired	-17.8842	-10.1669
CTA018	Paired	NaN	NaN
CTA025	Paired	1.85433	3.66044
CTA037	Paired	-8.99735	4.39076
CTA038	Paired	0.984659	-1.30296
CTA039	Paired	-8.8245	-3.87405
CTA045	Paired	9.37166	11.9159
CTA046	Paired	-9.12336	0.359241
CTA053	Paired	-0.0341413	8.08356
CTA054	Paired	-13.4219	4.71231

## Sheet: Figure 2B
Subject ID	Treatment	Normalized Forepaws Movement [Infusion - Preinfusion Movement(cm)]
		CD	TD
CTA002	Unpaired	NaN	NaN
CTA010	Unpaired	-14.9896	-8.34067
CTA011	Unpaired	-27.3882	-5.88831
CTA016	Unpaired	-27.1472	-15.1286
CTA023	Unpaired	-2.11556	-1.51086
CTA036	Unpaired	-21.5917	-6.12981
CTA040	Unpaired	-6.85482	-8.50846
CTA042	Unpaired	-9.76306	-2.94348
CTA043	Unpaired	2.09855	-5.60023
CTA047	Unpaired	-6.57741	-13.7062
CTA007	Paired	-8.60546	0.520811
CTA014	Paired	-14.6985	-12.0464
CTA018	Paired	NaN	NaN
CTA025	Paired	0.482413	8.99993
CTA037	Paired	-7.05984	12.0008
CTA038	Paired	-2.41652	-7.3707
CTA039	Paired	-4.79469	-5.15885
CTA045	Paired	0.971998	3.97215
CTA046	Paired	-12.2861	6.57671
CTA053	Paired	-4.15568	3.46741
CTA054	Paired	-12.8324	4.47929

## Sheet: Figure 2C
Subject ID	Treatment	Day	Dopamine Release Response (mean z-score)	Normalized Nose Movement [Infusion - Preinfusion Movement(cm)]
CTA002	Unpaired	CD	1.00647	NaN
CTA010	Unpaired	CD	1.15867	-7.46118
CTA011	Unpaired	CD	1.05753	-18.091
CTA016	Unpaired	CD	0.349748	-14.7765
CTA023	Unpaired	CD	0.221133	-2.0994
CTA036	Unpaired	CD	0.552471	-11.1046
CTA040	Unpaired	CD	0.726433	-1.49037
CTA042	Unpaired	CD	-0.025968	-7.21808
CTA043	Unpaired	CD	0.589698	-0.106379
CTA047	Unpaired	CD	0.583378	-2.4204
CTA007	Paired	CD	0.624949	-10.4914
CTA014	Paired	CD	0.79582	-17.8842
CTA018	Paired	CD	0.209597	NaN
CTA025	Paired	CD	0.013273	1.85433
CTA037	Paired	CD	0.836027	-8.99735
CTA038	Paired	CD	0.780712	0.984659
CTA039	Paired	CD	0.522671	-8.8245
CTA045	Paired	CD	0.026225	9.37166
CTA046	Paired	CD	1.3457	-9.12336
CTA053	Paired	CD	0.322183	-0.0341413
CTA054	Paired	CD	1.00267	-13.4219
CTA002	Unpaired	TD	0.928655	NaN
CTA010	Unpaired	TD	1.27598	-10.9069
CTA011	Unpaired	TD	1.05374	-7.4771
CTA016	Unpaired	TD	0.574997	-14.597
CTA023	Unpaired	TD	0.588905	-3.12997
CTA036	Unpaired	TD	0.698099	0.196169
CTA040	Unpaired	TD	0.309583	1.54641
CTA042	Unpaired	TD	0.715874	-13.4718
CTA043	Unpaired	TD	0.39022	0.404698
CTA047	Unpaired	TD	0.52794	-10.0064
CTA007	Paired	TD	0.318564	7.12821
CTA014	Paired	TD	0.081094	-10.1669
CTA018	Paired	TD	0.091605	NaN
CTA025	Paired	TD	-0.381941	3.66044
CTA037	Paired	TD	-0.055744	4.39076
CTA038	Paired	TD	0.245346	-1.30296
CTA039	Paired	TD	0.662154	-3.87405
CTA045	Paired	TD	-0.086482	11.9159
CTA046	Paired	TD	-0.029761	0.359241
CTA053	Paired	TD	-0.230764	8.08356
CTA054	Paired	TD	-0.057587	4.71231

## Sheet: Figure 2D
Subject ID	Treatment	Day	Dopamine Release Response (mean z-score)	Normalized Forepaws Movement [Infusion - Preinfusion Movement(cm)]
CTA002	Unpaired	CD	1.00647	NaN
CTA010	Unpaired	CD	1.15867	-14.9896
CTA011	Unpaired	CD	1.05753	-27.3882
CTA016	Unpaired	CD	0.349748	-27.1472
CTA023	Unpaired	CD	0.221133	-2.11556
CTA036	Unpaired	CD	0.552471	-21.5917
CTA040	Unpaired	CD	0.726433	-6.85482
CTA042	Unpaired	CD	-0.025968	-9.76306
CTA043	Unpaired	CD	0.589698	2.09855
CTA047	Unpaired	CD	0.583378	-6.57741
CTA007	Paired	CD	0.624949	-8.60546
CTA014	Paired	CD	0.79582	-14.6985
CTA018	Paired	CD	0.209597	NaN
CTA025	Paired	CD	0.013273	0.482413
CTA037	Paired	CD	0.836027	-7.05984
CTA038	Paired	CD	0.780712	-2.41652
CTA039	Paired	CD	0.522671	-4.79469
CTA045	Paired	CD	0.026225	0.971998
CTA046	Paired	CD	1.3457	-12.2861
CTA053	Paired	CD	0.322183	-4.15568
CTA054	Paired	CD	1.00267	-12.8324
CTA002	Unpaired	TD	0.928655	NaN
CTA010	Unpaired	TD	1.27598	-8.34067
CTA011	Unpaired	TD	1.05374	-5.88831
CTA016	Unpaired	TD	0.574997	-15.1286
CTA023	Unpaired	TD	0.588905	-1.51086
CTA036	Unpaired	TD	0.698099	-6.12981
CTA040	Unpaired	TD	0.309583	-8.50846
CTA042	Unpaired	TD	0.715874	-2.94348
CTA043	Unpaired	TD	0.39022	-5.60023
CTA047	Unpaired	TD	0.52794	-13.7062
CTA007	Paired	TD	0.318564	0.520811
CTA014	Paired	TD	0.081094	-12.0464
CTA018	Paired	TD	0.091605	NaN
CTA025	Paired	TD	-0.381941	8.99993
CTA037	Paired	TD	-0.055744	12.0008
CTA038	Paired	TD	0.245346	-7.3707
CTA039	Paired	TD	0.662154	-5.15885
CTA045	Paired	TD	-0.086482	3.97215
CTA046	Paired	TD	-0.029761	6.57671
CTA053	Paired	TD	-0.230764	3.46741
CTA054	Paired	TD	-0.057587	4.47929

## Sheet: Figure 2E
Subject ID	Treatment	Normalized Nose Movement [Infusion - Preinfusion Movement(cm)]
		CD	TD
TR44	Unpaired	-7.25029	-14.2154
TR45	Unpaired	-10.9237	-10.9572
TR53	Unpaired	-16.3529	-17.1169
TR57	Unpaired	-17.1121	-15.6318
TR59	Unpaired	NaN	NaN
TR75	Unpaired	-4.9385	-1.19553
TR33	Paired	-14.8043	-7.79351
TR35	Paired	-13.0497	-14.3471
TR46	Paired	-17.9298	-11.1597
TR52	Paired	-27.2118	-6.81025
TR72	Paired	-8.25468	-3.12825
TR77	Paired	-11.1653	-3.6523
TR78	Paired	-18.2074	-0.409783

## Sheet: Figure 2F
Subject ID	Treatment	Normalized Forepaws Movement [Infusion - Preinfusion Movement(cm)]
		CD	TD
TR44	Unpaired	-22.209	-18.1946
TR45	Unpaired	-19.9666	-18.2648
TR53	Unpaired	-20.563	-31.2372
TR57	Unpaired	-26.1209	-21.4144
TR59	Unpaired	NaN	NaN
TR75	Unpaired	-11.3694	-4.27237
TR33	Paired	-28.2919	-11.5995
TR35	Paired	-20.3982	-18.7503
TR46	Paired	-28.6463	-14.7789
TR52	Paired	-36.122	-6.52279
TR72	Paired	-15.703	-9.49615
TR77	Paired	-18.1229	-8.99777
TR78	Paired	-25.8851	-5.90527

## Sheet: Figure 2G
Subject ID	Treatment	Day	VTADA Activity Response (mean z-score)	Normalized Nose Movement [Infusion - Preinfusion Movement(cm)]
TR44	Unpaired	CD	0.374353	-7.25029
TR45	Unpaired	CD	0.557526	-10.9237
TR53	Unpaired	CD	0.786648	-16.3529
TR57	Unpaired	CD	0.779452	-17.1121
TR59	Unpaired	CD	0.632419	NaN
TR75	Unpaired	CD	0.033683	-4.9385
TR33	Paired	CD	-0.0825883	-14.8043
TR35	Paired	CD	0.181349	-13.0497
TR46	Paired	CD	1.34121	-17.9298
TR52	Paired	CD	0.516262	-27.2118
TR72	Paired	CD	-0.0226268	-8.25468
TR77	Paired	CD	0.22678	-11.1653
TR78	Paired	CD	1.13234	-18.2074
TR44	Unpaired	TD	0.00619274	-14.2154
TR45	Unpaired	TD	0.377141	-10.9572
TR53	Unpaired	TD	1.00458	-17.1169
TR57	Unpaired	TD	1.12853	-15.6318
TR59	Unpaired	TD	-0.0024876	NaN
TR75	Unpaired	TD	0.103235	-1.19553
TR33	Paired	TD	-0.0825883	-7.79351
TR35	Paired	TD	0.181349	-14.3471
TR46	Paired	TD	-0.202849	-11.1597
TR52	Paired	TD	-0.24029	-6.81025
TR72	Paired	TD	-0.125438	-3.12825
TR77	Paired	TD	-0.575465	-3.6523
TR78	Paired	TD	-0.461443	-0.409783
CTA053	Paired	TD	-0.230764	8.08356
CTA054	Paired	TD	-0.057587	4.71231

## Sheet: Figure 2H
Subject ID	Treatment	Day	VTADA Activity Response (mean z-score)	Normalized Forepaws Movement [Infusion - Preinfusion Movement(cm)]
TR44	Unpaired	CD	0.374353	-22.209
TR45	Unpaired	CD	0.557526	-19.9666
TR53	Unpaired	CD	0.786648	-20.563
TR57	Unpaired	CD	0.779452	-26.1209
TR59	Unpaired	CD	0.632419	NaN
TR75	Unpaired	CD	0.033683	-11.3694
TR33	Paired	CD	-0.0825883	-28.2919
TR35	Paired	CD	0.181349	-20.3982
TR46	Paired	CD	1.34121	-28.6463
TR52	Paired	CD	0.516262	-36.122
TR72	Paired	CD	-0.0226268	-15.703
TR77	Paired	CD	0.22678	-18.1229
TR78	Paired	CD	1.13234	-25.8851
TR44	Unpaired	TD	0.00619274	-18.1946
TR45	Unpaired	TD	0.377141	-18.2648
TR53	Unpaired	TD	1.00458	-31.2372
TR57	Unpaired	TD	1.12853	-21.4144
TR59	Unpaired	TD	-0.0024876	NaN
TR75	Unpaired	TD	0.103235	-4.27237
TR33	Paired	TD	-0.0825883	-11.5995
TR35	Paired	TD	0.181349	-18.7503
TR46	Paired	TD	-0.202849	-14.7789
TR52	Paired	TD	-0.24029	-6.52279
TR72	Paired	TD	-0.125438	-9.49615
TR77	Paired	TD	-0.575465	-8.99777
TR78	Paired	TD	-0.461443	-5.90527
CTA053	Paired	TD	-0.230764	8.08356
CTA054	Paired	TD	-0.057587	4.71231
