# Supplementary material for: Dopamine activity encodes the changing valence of the same stimulus in conditioned taste aversion paradigms
Source: eLife. 2025 Mar 5;13:RP103260. doi: 10.7554/eLife.103260 (PMC11882140; doi:10.7554/eLife.103260)
Supplement: Figure 5—source data 1. [file elife-103260-fig5-data1.xlsx]

## Sheet: Figure 5B Top
Time from infusion onset (s)	Unpaired: Conditioning Day: Dopamine Release to Sucrose infusion (z-score, averaged across subjects)																														Unpaired: Extinction Day 1: Dopamine Release to Sucrose infusion (z-score, averaged across subjects)
	Trial																														Trial
	1	2	3	4	5	6	7	8	9	10	11	12	13	14	15	16	17	18	19	20	21	22	23	24	25	26	27	28	29	30	1	2	3	4	5	6	7	8	9	10	11	12	13	14	15	16	17	18	19
-5	-0.506711	0.526591	-0.749265	-0.254153	0.311053	0.488265	-0.0687168	-0.557701	0.445746	-0.118086	-0.426196	-0.00397037	-0.0234312	-0.121382	0.0816003	0.535582	0.240387	-0.169224	0.0793816	-0.344945	-0.439143	-0.385775	-0.214727	-0.35654	-0.29721	0.37298	-0.552425	0.513225	0.166469	-0.0810763	0.00558409	0.583337	-0.51134	-0.41873	-0.00477184	-0.379443	-0.664591	-0.48755	0.043115	0.113788	-0.477754	0.0432348	-0.458258	-0.334615	0.0319909	-0.634866	0.81356	0.442298	-0.373635
-4.99902	-0.508085	0.523813	-0.749779	-0.254183	0.313272	0.489558	-0.0680513	-0.558482	0.446002	-0.117605	-0.427317	-0.00379176	-0.0226858	-0.122276	0.0800521	0.53675	0.241873	-0.169832	0.0801688	-0.345154	-0.438228	-0.385554	-0.214549	-0.356069	-0.296197	0.374096	-0.550784	0.513497	0.164548	-0.0823534	0.00748678	0.585878	-0.509558	-0.416643	-0.00453297	-0.379057	-0.664262	-0.487293	0.0431599	0.113942	-0.475842	0.0426336	-0.456982	-0.334378	0.0336707	-0.63506	0.815462	0.441087	-0.373183
-4.99803	-0.509469	0.521038	-0.750281	-0.254224	0.31549	0.490835	-0.0673807	-0.559259	0.446243	-0.117122	-0.428443	-0.00362218	-0.0219444	-0.123173	0.0785013	0.537899	0.243351	-0.170433	0.0809621	-0.345367	-0.437308	-0.385344	-0.21437	-0.355585	-0.295183	0.375208	-0.549141	0.51375	0.162633	-0.0836303	0.00938975	0.588416	-0.507777	-0.414541	-0.00430124	-0.378679	-0.663913	-0.48702	0.0432108	0.114103	-0.473919	0.0420179	-0.455692	-0.334144	0.0353553	-0.635255	0.817347	0.439873	-0.372724
-4.99705	-0.510863	0.518265	-0.750769	-0.254275	0.317706	0.492095	-0.0667053	-0.560029	0.446467	-0.116634	-0.429573	-0.00346153	-0.0212071	-0.124073	0.0769479	0.539029	0.244821	-0.171025	0.0817617	-0.345586	-0.436383	-0.385145	-0.21419	-0.355087	-0.29417	0.376316	-0.547497	0.513985	0.160721	-0.0849067	0.0112929	0.590951	-0.505997	-0.412423	-0.00407668	-0.378307	-0.663545	-0.486732	0.0432677	0.114272	-0.471984	0.0413878	-0.454389	-0.333912	0.0370446	-0.63545	0.819216	0.438656	-0.372258
-4.99607	-0.512265	0.515496	-0.751244	-0.254338	0.319921	0.493339	-0.0660255	-0.560794	0.446676	-0.116143	-0.430708	-0.00330973	-0.020474	-0.124976	0.075392	0.54014	0.246283	-0.171609	0.0825677	-0.345809	-0.435452	-0.384957	-0.214011	-0.354576	-0.293157	0.37742	-0.545853	0.514201	0.158815	-0.0861827	0.013196	0.593482	-0.50422	-0.41029	-0.00385934	-0.377942	-0.663156	-0.486429	0.0433307	0.114448	-0.470038	0.0407432	-0.453074	-0.333682	0.0387385	-0.635644	0.821067	0.437436	-0.371786
-4.99508	-0.513677	0.51273	-0.751706	-0.254412	0.322134	0.494567	-0.0653413	-0.561554	0.446869	-0.115649	-0.431847	-0.00316672	-0.019745	-0.125881	0.0738337	0.541231	0.247737	-0.172186	0.0833801	-0.346036	-0.434516	-0.38478	-0.21383	-0.354052	-0.292144	0.378521	-0.544207	0.514399	0.156913	-0.0874581	0.0150989	0.596009	-0.502444	-0.408142	-0.00364927	-0.377585	-0.662747	-0.486111	0.0433997	0.114632	-0.468081	0.0400841	-0.451745	-0.333454	0.0404368	-0.635838	0.822902	0.436213	-0.371307
-4.9941	-0.515097	0.509968	-0.752154	-0.254498	0.324346	0.495778	-0.0646531	-0.562307	0.447046	-0.115152	-0.43299	-0.00303239	-0.0190203	-0.12679	0.0722729	0.542304	0.249182	-0.172754	0.0841991	-0.346268	-0.433575	-0.384614	-0.21365	-0.353515	-0.291132	0.379617	-0.542562	0.514579	0.155016	-0.0887329	0.0170016	0.598532	-0.500669	-0.40598	-0.00344651	-0.377235	-0.662319	-0.485777	0.0434747	0.114823	-0.466113	0.0394105	-0.450404	-0.333229	0.0421396	-0.636033	0.824718	0.434988	-0.370823
-4.99312	-0.516526	0.507209	-0.752589	-0.254594	0.326556	0.496973	-0.0639612	-0.563056	0.447208	-0.114651	-0.434138	-0.00290668	-0.0183	-0.127702	0.0707096	0.543357	0.250619	-0.173315	0.0850249	-0.346505	-0.432628	-0.38446	-0.213469	-0.352965	-0.29012	0.380709	-0.540915	0.514741	0.153124	-0.0900068	0.0189039	0.601051	-0.498896	-0.403802	-0.00325109	-0.376892	-0.66187	-0.485428	0.0435558	0.115021	-0.464133	0.0387224	-0.449049	-0.333007	0.0438465	-0.636226	0.826518	0.433759	-0.370332
-4.99214	-0.517964	0.504453	-0.75301	-0.254701	0.328763	0.498152	-0.0632656	-0.563799	0.447353	-0.114148	-0.43529	-0.0027895	-0.0175842	-0.128617	0.0691441	0.544391	0.252047	-0.173867	0.0858573	-0.346747	-0.431677	-0.384316	-0.213287	-0.352402	-0.289108	0.381797	-0.539269	0.514885	0.151237	-0.0912798	0.0208056	0.603564	-0.497125	-0.40161	-0.00306307	-0.376557	-0.661402	-0.485064	0.0436429	0.115226	-0.462142	0.0380197	-0.447682	-0.332787	0.0455575	-0.63642	0.828299	0.432529	-0.369835
-4.99115	-0.51941	0.501702	-0.753417	-0.254819	0.330969	0.499314	-0.0625668	-0.564536	0.447482	-0.113642	-0.436446	-0.00268077	-0.0168728	-0.129535	0.0675761	0.545405	0.253466	-0.174411	0.0866967	-0.346992	-0.43072	-0.384184	-0.213105	-0.351825	-0.288097	0.382881	-0.537622	0.515012	0.149355	-0.0925518	0.0227067	0.606073	-0.495355	-0.399403	-0.00288247	-0.376229	-0.660914	-0.484686	0.043736	0.11544	-0.460141	0.0373025	-0.446302	-0.332569	0.0472724	-0.636613	0.830062	0.431296	-0.369332
-4.99017	-0.520864	0.498955	-0.753811	-0.254948	0.333173	0.50046	-0.0618648	-0.565268	0.447595	-0.113132	-0.437607	-0.00258039	-0.0161659	-0.130456	0.0660059	0.546399	0.254876	-0.174948	0.0875431	-0.347242	-0.429759	-0.384064	-0.212922	-0.351235	-0.287085	0.38396	-0.535976	0.515121	0.147478	-0.0938227	0.0246069	0.608576	-0.493587	-0.397182	-0.00270934	-0.375908	-0.660405	-0.484292	0.0438351	0.115661	-0.458128	0.0365708	-0.444908	-0.332354	0.0489911	-0.636805	0.831808	0.43006	-0.368823
-4.98919	-0.522326	0.496212	-0.754191	-0.255088	0.335374	0.501589	-0.0611601	-0.565994	0.447693	-0.11262	-0.438772	-0.00248829	-0.0154638	-0.131379	0.0644333	0.547374	0.256276	-0.175476	0.0883966	-0.347497	-0.428792	-0.383955	-0.212739	-0.350633	-0.286074	0.385035	-0.534329	0.515214	0.145608	-0.0950924	0.0265062	0.611073	-0.49182	-0.394947	-0.00254371	-0.375595	-0.659877	-0.483884	0.0439402	0.115889	-0.456104	0.0358245	-0.443502	-0.332141	0.0507135	-0.636998	0.833534	0.428822	-0.368308
-4.9882	-0.523795	0.493474	-0.754556	-0.25524	0.337573	0.502701	-0.0604527	-0.566715	0.447774	-0.112105	-0.439941	-0.00240439	-0.0147663	-0.132305	0.0628585	0.548329	0.257667	-0.175996	0.0892572	-0.347756	-0.427821	-0.383858	-0.212556	-0.350016	-0.285064	0.386105	-0.532684	0.515289	0.143742	-0.0963608	0.0284043	0.613565	-0.490054	-0.392698	-0.00238561	-0.375289	-0.659329	-0.48346	0.0440513	0.116125	-0.45407	0.0350636	-0.442083	-0.331932	0.0524394	-0.637189	0.835242	0.427582	-0.367788
-4.98722	-0.525273	0.49074	-0.754908	-0.255402	0.339769	0.503797	-0.059743	-0.567431	0.447839	-0.111588	-0.441114	-0.00232858	-0.0140736	-0.133234	0.0612816	0.549265	0.259048	-0.176508	0.0901252	-0.348019	-0.426845	-0.383772	-0.212372	-0.349387	-0.284053	0.387171	-0.531038	0.515347	0.141883	-0.0976278	0.0303013	0.61605	-0.48829	-0.390435	-0.00223508	-0.374991	-0.658761	-0.483023	0.0441684	0.116369	-0.452025	0.0342882	-0.440651	-0.331725	0.0541687	-0.63738	0.836931	0.42634	-0.367262
-4.98624	-0.526758	0.488011	-0.755245	-0.255575	0.341962	0.504876	-0.0590312	-0.568141	0.447889	-0.111068	-0.442292	-0.00226079	-0.0133857	-0.134165	0.0597024	0.55018	0.26042	-0.177011	0.0910005	-0.348287	-0.425865	-0.383698	-0.212187	-0.348745	-0.283043	0.388232	-0.529394	0.515388	0.140029	-0.0988933	0.0321968	0.618529	-0.486527	-0.388157	-0.00209215	-0.3747	-0.658173	-0.48257	0.0442915	0.11662	-0.44997	0.0334983	-0.439206	-0.33152	0.0559012	-0.63757	0.838601	0.425096	-0.36673
-4.98525	-0.52825	0.485287	-0.755568	-0.255759	0.344153	0.505938	-0.0583176	-0.568846	0.447922	-0.110546	-0.443474	-0.00220093	-0.0127027	-0.135099	0.0581211	0.551076	0.261781	-0.177507	0.0918834	-0.348559	-0.424879	-0.383637	-0.212002	-0.34809	-0.282033	0.389288	-0.52775	0.515414	0.138181	-0.100157	0.0340909	0.621001	-0.484766	-0.385867	-0.00195684	-0.374416	-0.657566	-0.482103	0.0444205	0.11688	-0.447904	0.0326938	-0.437749	-0.331319	0.0576368	-0.63776	0.840252	0.42385	-0.366192
-4.98427	-0.529749	0.482568	-0.755877	-0.255953	0.346341	0.506984	-0.0576023	-0.569545	0.447939	-0.110021	-0.44466	-0.00214891	-0.0120247	-0.136036	0.0565377	0.551951	0.263132	-0.177994	0.0927739	-0.348835	-0.423889	-0.383587	-0.211816	-0.347421	-0.281023	0.390339	-0.526107	0.515422	0.13634	-0.101419	0.0359833	0.623466	-0.483006	-0.383562	-0.00182919	-0.374141	-0.656938	-0.481622	0.0445556	0.117147	-0.445827	0.0318748	-0.436278	-0.33112	0.0593754	-0.637949	0.841884	0.422603	-0.36565
-4.98329	-0.531255	0.479854	-0.756171	-0.256159	0.348525	0.508013	-0.0568857	-0.570239	0.44794	-0.109494	-0.44585	-0.00210464	-0.0113518	-0.136975	0.0549523	0.552806	0.264472	-0.178474	0.0936721	-0.349115	-0.422895	-0.383549	-0.21163	-0.346739	-0.280013	0.391385	-0.524466	0.515415	0.134504	-0.10268	0.037874	0.625923	-0.481247	-0.381245	-0.00170921	-0.373872	-0.656291	-0.481126	0.0446966	0.117421	-0.443741	0.0310412	-0.434794	-0.330924	0.0611167	-0.638137	0.843496	0.421353	-0.365102
-4.98231	-0.532768	0.477146	-0.756451	-0.256375	0.350707	0.509025	-0.056168	-0.570928	0.447926	-0.108965	-0.447044	-0.00206804	-0.0106839	-0.137917	0.0533648	0.553641	0.265802	-0.178945	0.0945781	-0.349399	-0.421896	-0.383523	-0.211443	-0.346045	-0.279004	0.392427	-0.522826	0.515392	0.132675	-0.103938	0.0397627	0.628373	-0.479489	-0.378914	-0.00159694	-0.373612	-0.655623	-0.480617	0.0448436	0.117704	-0.441644	0.0301931	-0.433298	-0.330731	0.0628607	-0.638324	0.845088	0.420102	-0.364548
-4.98132	-0.534288	0.474444	-0.756715	-0.256603	0.352885	0.51002	-0.0554493	-0.571611	0.447895	-0.108433	-0.448243	-0.002039	-0.0100212	-0.138861	0.0517753	0.554456	0.267121	-0.179408	0.095492	-0.349687	-0.420893	-0.383509	-0.211256	-0.345337	-0.277994	0.393463	-0.521188	0.515354	0.130852	-0.105194	0.0416495	0.630816	-0.477732	-0.37657	-0.0014924	-0.373359	-0.654937	-0.480093	0.0449965	0.117995	-0.439537	0.0293305	-0.431789	-0.330541	0.0646072	-0.63851	0.84666	0.418849	-0.36399
-4.98034	-0.535813	0.471747	-0.756966	-0.256841	0.35506	0.510998	-0.0547301	-0.572289	0.447848	-0.1079	-0.449445	-0.00201745	-0.00936376	-0.139807	0.0501839	0.555251	0.26843	-0.179863	0.0964139	-0.34998	-0.419885	-0.383508	-0.211068	-0.344616	-0.276985	0.394494	-0.519551	0.515299	0.129036	-0.106449	0.043534	0.63325	-0.475977	-0.374212	-0.00139561	-0.373113	-0.65423	-0.479555	0.0451554	0.118293	-0.437419	0.0284534	-0.430267	-0.330354	0.066356	-0.638695	0.848212	0.417595	-0.363426
-4.97936	-0.537345	0.469056	-0.757201	-0.257089	0.357232	0.51196	-0.0540105	-0.572962	0.447785	-0.107365	-0.450652	-0.00200328	-0.00871157	-0.140756	0.0485906	0.556025	0.269727	-0.180309	0.0973439	-0.350276	-0.418873	-0.383519	-0.210879	-0.343882	-0.275976	0.395519	-0.517916	0.51523	0.127226	-0.107701	0.0454163	0.635676	-0.474222	-0.371842	-0.00130659	-0.372875	-0.653503	-0.479003	0.0453203	0.118599	-0.435292	0.0275619	-0.428732	-0.330169	0.068107	-0.638879	0.849743	0.41634	-0.362857
-4.97837	-0.538883	0.466372	-0.757421	-0.257349	0.359399	0.512904	-0.0532907	-0.57363	0.447706	-0.106828	-0.451863	-0.00199642	-0.00806473	-0.141707	0.0469953	0.556778	0.271012	-0.180747	0.0982821	-0.350577	-0.417857	-0.383542	-0.21069	-0.343135	-0.274968	0.39654	-0.516284	0.515145	0.125424	-0.108951	0.0472961	0.638093	-0.472469	-0.36946	-0.00122535	-0.372645	-0.652757	-0.478437	0.045491	0.118913	-0.433155	0.0266559	-0.427184	-0.329988	0.06986	-0.639062	0.851255	0.415083	-0.362284
-4.97739	-0.540427	0.463693	-0.757627	-0.257619	0.361563	0.513832	-0.052571	-0.574292	0.447611	-0.106289	-0.453078	-0.00199675	-0.00742329	-0.142661	0.0453983	0.557512	0.272287	-0.181178	0.0992286	-0.350881	-0.416837	-0.383578	-0.2105	-0.342374	-0.273959	0.397554	-0.514653	0.515046	0.123628	-0.110198	0.0491734	0.640501	-0.470716	-0.367064	-0.00115192	-0.372422	-0.651992	-0.477857	0.0456677	0.119236	-0.431008	0.0257354	-0.425624	-0.32981	0.0716149	-0.639244	0.852745	0.413825	-0.361705
-4.97641	-0.541977	0.461022	-0.757817	-0.2579	0.363724	0.514742	-0.0518516	-0.574949	0.4475	-0.105748	-0.454296	-0.00200421	-0.00678732	-0.143616	0.0437994	0.558224	0.273549	-0.1816	0.100184	-0.351189	-0.415813	-0.383626	-0.21031	-0.341601	-0.272951	0.398564	-0.513025	0.514932	0.121839	-0.111443	0.051048	0.6429	-0.468965	-0.364657	-0.00108631	-0.372208	-0.651206	-0.477264	0.0458503	0.119566	-0.428852	0.0248006	-0.424051	-0.329635	0.0733715	-0.639425	0.854215	0.412566	-0.361122
-4.97542	-0.543532	0.458357	-0.757992	-0.258191	0.36588	0.515636	-0.0511329	-0.575601	0.447373	-0.105206	-0.455519	-0.00201868	-0.00615687	-0.144574	0.0421988	0.558916	0.2748	-0.182013	0.101147	-0.351501	-0.414785	-0.383686	-0.210119	-0.340815	-0.271942	0.399568	-0.5114	0.514804	0.120057	-0.112685	0.0529198	0.645289	-0.467214	-0.362237	-0.00102853	-0.372	-0.650401	-0.476657	0.0460388	0.119904	-0.426686	0.0238514	-0.422465	-0.329464	0.0751296	-0.639604	0.855664	0.411306	-0.360535
-4.97444	-0.545092	0.455698	-0.758152	-0.258493	0.368032	0.516513	-0.050415	-0.576248	0.447231	-0.104662	-0.456746	-0.00204008	-0.005532	-0.145534	0.0405964	0.559588	0.276039	-0.182419	0.102119	-0.351817	-0.413753	-0.383759	-0.209927	-0.340016	-0.270934	0.400566	-0.509777	0.514661	0.118282	-0.113925	0.0547886	0.647669	-0.465464	-0.359805	-0.000978592	-0.371801	-0.649577	-0.476037	0.0462332	0.12025	-0.42451	0.0228878	-0.420866	-0.329295	0.0768892	-0.639783	0.857091	0.410045	-0.359942
-4.97346	-0.546657	0.453047	-0.758296	-0.258806	0.37018	0.517372	-0.0496981	-0.576889	0.447072	-0.104117	-0.457977	-0.0020683	-0.00491277	-0.146496	0.0389924	0.560238	0.277265	-0.182816	0.1031	-0.352137	-0.412717	-0.383845	-0.209734	-0.339204	-0.269926	0.401558	-0.508157	0.514505	0.116515	-0.115162	0.0566543	0.650039	-0.463715	-0.35736	-0.000936513	-0.371609	-0.648733	-0.475404	0.0464335	0.120604	-0.422326	0.0219098	-0.419255	-0.32913	0.0786499	-0.639959	0.858497	0.408783	-0.359345
-4.97247	-0.548227	0.450403	-0.758425	-0.259128	0.372324	0.518215	-0.0489826	-0.577525	0.446897	-0.103571	-0.459211	-0.00210327	-0.00429923	-0.14746	0.0373867	0.560868	0.27848	-0.183205	0.104089	-0.35246	-0.411677	-0.383944	-0.209541	-0.338378	-0.268918	0.402545	-0.50654	0.514334	0.114755	-0.116396	0.0585169	0.652398	-0.461967	-0.354904	-0.000902299	-0.371425	-0.647869	-0.474757	0.0466397	0.120966	-0.420131	0.0209176	-0.417631	-0.328968	0.0804116	-0.640135	0.859882	0.40752	-0.358744
-4.97149	-0.549802	0.447766	-0.758539	-0.259462	0.374463	0.51904	-0.0482686	-0.578157	0.446706	-0.103023	-0.46045	-0.00214488	-0.00369143	-0.148425	0.0357794	0.561478	0.279682	-0.183586	0.105088	-0.352787	-0.410634	-0.384055	-0.209347	-0.33754	-0.26791	0.403526	-0.504926	0.51415	0.113003	-0.117627	0.0603761	0.654747	-0.460219	-0.352437	-0.000875956	-0.371248	-0.646987	-0.474097	0.0468517	0.121336	-0.417928	0.0199111	-0.415994	-0.328809	0.0821743	-0.640308	0.861245	0.406257	-0.358138
-4.97051	-0.551382	0.445136	-0.758637	-0.259806	0.376598	0.519848	-0.0475564	-0.578783	0.4465	-0.102474	-0.461692	-0.00219303	-0.00308944	-0.149393	0.0341705	0.562066	0.280871	-0.183959	0.106095	-0.353118	-0.409587	-0.384179	-0.209152	-0.336689	-0.266903	0.404501	-0.503315	0.513953	0.111258	-0.118855	0.0622319	0.657085	-0.458472	-0.349957	-0.000857491	-0.37108	-0.646084	-0.473425	0.0470695	0.121714	-0.415716	0.0188904	-0.414345	-0.328654	0.0839377	-0.640481	0.862586	0.404993	-0.357528
-4.96953	-0.552965	0.442515	-0.758719	-0.26016	0.378728	0.52064	-0.0468463	-0.579404	0.446277	-0.101925	-0.462938	-0.00224764	-0.0024933	-0.150362	0.0325602	0.562634	0.282047	-0.184324	0.107111	-0.353452	-0.408536	-0.384316	-0.208957	-0.335825	-0.265895	0.405469	-0.501708	0.513742	0.109521	-0.12008	0.0640842	0.659412	-0.456725	-0.347466	-0.000846908	-0.370918	-0.645163	-0.472739	0.0472932	0.122099	-0.413495	0.0178555	-0.412683	-0.328501	0.0857016	-0.640651	0.863906	0.403729	-0.356914
-4.96854	-0.554553	0.439901	-0.758785	-0.260524	0.380853	0.521414	-0.0461385	-0.58002	0.446039	-0.101374	-0.464188	-0.0023086	-0.00190306	-0.151334	0.0309483	0.56318	0.283211	-0.18468	0.108137	-0.35379	-0.407482	-0.384466	-0.208761	-0.334948	-0.264887	0.406432	-0.500105	0.513519	0.107792	-0.121302	0.0659327	0.661728	-0.454979	-0.344964	-0.000844208	-0.370765	-0.644222	-0.472041	0.0475227	0.122493	-0.411265	0.0168064	-0.411009	-0.328353	0.0874658	-0.64082	0.865203	0.402464	-0.356296
-4.96756	-0.556145	0.437295	-0.758836	-0.260899	0.382974	0.522171	-0.0454332	-0.58063	0.445785	-0.100822	-0.465441	-0.00237581	-0.00131878	-0.152307	0.029335	0.563706	0.284361	-0.185028	0.109172	-0.354132	-0.406425	-0.384629	-0.208564	-0.334058	-0.263879	0.407389	-0.498505	0.513283	0.10607	-0.12252	0.0677774	0.664032	-0.453233	-0.342451	-0.000849394	-0.37062	-0.643262	-0.47133	0.0477581	0.122895	-0.409026	0.0157432	-0.409322	-0.328208	0.0892303	-0.640988	0.866478	0.401199	-0.355674
-4.96658	-0.557741	0.434697	-0.758871	-0.261284	0.385089	0.522911	-0.0447306	-0.581236	0.445515	-0.100269	-0.466698	-0.00244919	-0.000740497	-0.153281	0.0277203	0.564211	0.285499	-0.185368	0.110216	-0.354477	-0.405364	-0.384804	-0.208366	-0.333155	-0.262872	0.408339	-0.49691	0.513034	0.104357	-0.123735	0.0696181	0.666324	-0.451488	-0.339927	-0.000862464	-0.370482	-0.642283	-0.470606	0.0479992	0.123305	-0.406779	0.014666	-0.407622	-0.328066	0.0909948	-0.641153	0.86773	0.399934	-0.355048
-4.96559	-0.55934	0.432108	-0.75889	-0.261679	0.3872	0.523634	-0.0440311	-0.581837	0.445229	-0.0997162	-0.467959	-0.00252863	-0.00016827	-0.154257	0.0261042	0.564695	0.286622	-0.1857	0.11127	-0.354825	-0.4043	-0.384993	-0.208167	-0.33224	-0.261864	0.409283	-0.495319	0.512774	0.102652	-0.124947	0.0714548	0.668605	-0.449743	-0.337391	-0.000883416	-0.370351	-0.641285	-0.46987	0.0482461	0.123723	-0.404523	0.0135747	-0.40591	-0.327928	0.0927591	-0.641317	0.86896	0.398669	-0.354419
-4.96461	-0.560943	0.429527	-0.758893	-0.262085	0.389305	0.52434	-0.0433348	-0.582433	0.444927	-0.0991623	-0.469224	-0.00261403	0.000397856	-0.155235	0.0244868	0.565158	0.287733	-0.186024	0.112333	-0.355177	-0.403233	-0.385195	-0.207968	-0.331311	-0.260857	0.410221	-0.493731	0.512501	0.100955	-0.126155	0.0732873	0.670873	-0.447998	-0.334845	-0.000912247	-0.370229	-0.640267	-0.469122	0.0484988	0.124148	-0.402259	0.0124695	-0.404186	-0.327793	0.0945231	-0.641478	0.870168	0.397404	-0.353785
-4.96363	-0.562548	0.426954	-0.758879	-0.2625	0.391405	0.525028	-0.042642	-0.583023	0.44461	-0.0986078	-0.470492	-0.0027053	0.000957835	-0.156214	0.0228682	0.565599	0.288829	-0.186339	0.113406	-0.355533	-0.402162	-0.385409	-0.207768	-0.33037	-0.259849	0.411152	-0.492149	0.512216	0.099266	-0.127359	0.0751155	0.673128	-0.446253	-0.332289	-0.00094895	-0.370114	-0.639231	-0.468362	0.0487572	0.124582	-0.399987	0.0113503	-0.402449	-0.327662	0.0962866	-0.641638	0.871352	0.396139	-0.353148
-4.96264	-0.564157	0.424391	-0.75885	-0.262926	0.3935	0.5257	-0.0419529	-0.583609	0.444277	-0.0980529	-0.471763	-0.00280234	0.00151162	-0.157195	0.0212483	0.56602	0.289912	-0.186647	0.114488	-0.355891	-0.401089	-0.385637	-0.207566	-0.329416	-0.258841	0.412076	-0.490571	0.51192	0.0975857	-0.12856	0.0769393	0.67537	-0.444508	-0.329722	-0.000993519	-0.370007	-0.638176	-0.467589	0.0490214	0.125023	-0.397706	0.0102173	-0.400699	-0.327534	0.0980494	-0.641796	0.872514	0.394874	-0.352507
-4.96166	-0.565769	0.421836	-0.758804	-0.263362	0.395589	0.526354	-0.0412678	-0.58419	0.443928	-0.0974976	-0.473038	-0.00290505	0.00205917	-0.158177	0.0196273	0.56642	0.29098	-0.186946	0.11558	-0.356253	-0.400013	-0.385878	-0.207364	-0.328449	-0.257834	0.412995	-0.488998	0.511612	0.0959138	-0.129756	0.0787585	0.6776	-0.442764	-0.327144	-0.00104594	-0.369907	-0.637102	-0.466805	0.0492913	0.125473	-0.395418	0.00907039	-0.398938	-0.327411	0.0998113	-0.641952	0.873653	0.393609	-0.351863
-4.96068	-0.567383	0.419291	-0.758742	-0.263807	0.397672	0.526992	-0.0405869	-0.584766	0.443564	-0.096942	-0.474317	-0.00301334	0.00260044	-0.15916	0.0180051	0.566798	0.292035	-0.187237	0.116682	-0.356619	-0.398933	-0.386132	-0.207161	-0.32747	-0.256826	0.413906	-0.487429	0.511293	0.0942506	-0.130949	0.0805731	0.679816	-0.441019	-0.324557	-0.00110622	-0.369815	-0.636009	-0.466009	0.0495669	0.12593	-0.393122	0.00790975	-0.397164	-0.32729	0.101572	-0.642105	0.874768	0.392345	-0.351216
-4.9597	-0.569	0.416754	-0.758664	-0.264263	0.39975	0.527612	-0.0399104	-0.585336	0.443184	-0.0963862	-0.475598	-0.00312709	0.00313539	-0.160145	0.0163818	0.567156	0.293075	-0.187521	0.117794	-0.356987	-0.397851	-0.3864	-0.206958	-0.326477	-0.255818	0.414811	-0.485866	0.510964	0.092596	-0.132138	0.0823829	0.682018	-0.439274	-0.321959	-0.00117432	-0.369731	-0.634897	-0.465202	0.0498483	0.126395	-0.390818	0.0067354	-0.395377	-0.327174	0.103332	-0.642257	0.87586	0.391081	-0.350565
-4.95871	-0.570619	0.414228	-0.758569	-0.264728	0.401822	0.528215	-0.0392385	-0.585902	0.442789	-0.0958302	-0.476884	-0.00324622	0.00366397	-0.161131	0.0147575	0.567492	0.294101	-0.187796	0.118917	-0.357359	-0.396766	-0.38668	-0.206753	-0.325472	-0.25481	0.415709	-0.484308	0.510623	0.0909502	-0.133323	0.0841878	0.684207	-0.437529	-0.319351	-0.00125025	-0.369654	-0.633767	-0.464383	0.0501353	0.126868	-0.388506	0.00554739	-0.393579	-0.327061	0.10509	-0.642406	0.876928	0.389818	-0.349911
-4.95773	-0.57224	0.41171	-0.758458	-0.265203	0.403889	0.528801	-0.0385716	-0.586463	0.442378	-0.0952743	-0.478172	-0.00337061	0.00418615	-0.162118	0.0131322	0.567807	0.295112	-0.188063	0.120049	-0.357734	-0.395679	-0.386974	-0.206547	-0.324455	-0.253802	0.4166	-0.482755	0.510272	0.0893133	-0.134504	0.0859877	0.686381	-0.435784	-0.316734	-0.00133399	-0.369585	-0.632618	-0.463552	0.0504279	0.127348	-0.386187	0.00434578	-0.391768	-0.326953	0.106847	-0.642552	0.877973	0.388555	-0.349254
-4.95675	-0.573863	0.409203	-0.75833	-0.265688	0.405949	0.52937	-0.0379098	-0.587019	0.441951	-0.0947184	-0.479464	-0.00350019	0.00470188	-0.163106	0.0115059	0.568102	0.296109	-0.188322	0.121191	-0.358112	-0.394589	-0.387281	-0.20634	-0.323425	-0.252794	0.417484	-0.481208	0.509911	0.0876852	-0.13568	0.0877825	0.688542	-0.434039	-0.314107	-0.00142551	-0.369524	-0.631451	-0.462711	0.0507262	0.127837	-0.383861	0.00313065	-0.389945	-0.326847	0.108601	-0.642697	0.878995	0.387293	-0.348594
-4.95576	-0.575487	0.406706	-0.758185	-0.266183	0.408003	0.529921	-0.0372533	-0.58757	0.441509	-0.0941626	-0.480759	-0.00363483	0.00521114	-0.164095	0.00987875	0.568375	0.29709	-0.188573	0.122344	-0.358493	-0.393496	-0.387601	-0.206132	-0.322382	-0.251786	0.418362	-0.479667	0.50954	0.0860663	-0.136852	0.0895721	0.690687	-0.432293	-0.31147	-0.00152481	-0.36947	-0.630265	-0.461858	0.0510302	0.128333	-0.381527	0.00190204	-0.38811	-0.326746	0.110354	-0.642839	0.879992	0.386032	-0.347931
-4.95478	-0.577113	0.404218	-0.758024	-0.266687	0.410051	0.530456	-0.0366024	-0.588117	0.441052	-0.093607	-0.482057	-0.00377444	0.00571387	-0.165085	0.00825073	0.568626	0.298057	-0.188816	0.123507	-0.358877	-0.392401	-0.387935	-0.205923	-0.321326	-0.250778	0.419232	-0.478131	0.509159	0.0844564	-0.13802	0.0913563	0.692818	-0.430547	-0.308825	-0.00163186	-0.369424	-0.629061	-0.460994	0.0513397	0.128837	-0.379186	0.000660038	-0.386263	-0.326649	0.112105	-0.642978	0.880966	0.384772	-0.347265
-4.9538	-0.578741	0.401741	-0.757846	-0.267201	0.412093	0.530973	-0.0359573	-0.588658	0.440579	-0.0930517	-0.483358	-0.00391893	0.00621006	-0.166075	0.00662192	0.568857	0.299009	-0.189051	0.124681	-0.359265	-0.391303	-0.388281	-0.205713	-0.320258	-0.249769	0.420095	-0.476602	0.508769	0.0828557	-0.139183	0.093135	0.694934	-0.4288	-0.30617	-0.00174664	-0.369385	-0.627838	-0.46012	0.0516549	0.129348	-0.376839	-0.000595303	-0.384403	-0.326556	0.113853	-0.643115	0.881915	0.383513	-0.346596
-4.95281	-0.580369	0.399275	-0.757651	-0.267724	0.414128	0.531474	-0.0353183	-0.589194	0.440091	-0.0924969	-0.484662	-0.00406819	0.00669965	-0.167067	0.00499235	0.569067	0.299945	-0.189278	0.125865	-0.359655	-0.390204	-0.388641	-0.205502	-0.319178	-0.24876	0.420951	-0.475078	0.508369	0.0812643	-0.140342	0.0949082	0.697035	-0.427052	-0.303506	-0.00186912	-0.369354	-0.626598	-0.459235	0.0519756	0.129867	-0.374484	-0.00186391	-0.382532	-0.326466	0.115599	-0.64325	0.88284	0.382255	-0.345925
-4.95183	-0.581998	0.396818	-0.75744	-0.268257	0.416157	0.531957	-0.0346856	-0.589726	0.439588	-0.0919425	-0.48597	-0.00422212	0.00718262	-0.168059	0.00336208	0.569255	0.300866	-0.189497	0.127059	-0.360048	-0.389102	-0.389015	-0.20529	-0.318085	-0.247752	0.4218	-0.473561	0.507961	0.0796823	-0.141496	0.0966757	0.69912	-0.425304	-0.300833	-0.00199929	-0.36933	-0.625339	-0.458339	0.0523019	0.130394	-0.372123	-0.00314571	-0.380649	-0.326381	0.117342	-0.643381	0.883741	0.380998	-0.345251
-4.95085	-0.583628	0.394373	-0.757211	-0.268799	0.418179	0.532423	-0.0340593	-0.590253	0.439069	-0.0913886	-0.48728	-0.00438061	0.00765894	-0.169052	0.00173116	0.569422	0.301771	-0.189709	0.128265	-0.360444	-0.387998	-0.389401	-0.205077	-0.316979	-0.246742	0.422641	-0.47205	0.507543	0.0781097	-0.142645	0.0984374	0.701189	-0.423555	-0.298151	-0.00213712	-0.369314	-0.624062	-0.457434	0.0526338	0.130928	-0.369755	-0.00444063	-0.378754	-0.326299	0.119082	-0.64351	0.884618	0.379742	-0.344574
-4.94986	-0.585259	0.391939	-0.756966	-0.269351	0.420194	0.532873	-0.0334398	-0.590775	0.438535	-0.0908354	-0.488593	-0.00454358	0.00812858	-0.170046	9.96437e-05	0.569568	0.302661	-0.189912	0.129481	-0.360844	-0.386891	-0.389801	-0.204863	-0.315861	-0.245733	0.423476	-0.470546	0.507117	0.0765467	-0.14379	0.100193	0.703243	-0.421805	-0.29546	-0.00228257	-0.369305	-0.622768	-0.456517	0.0529711	0.13147	-0.367381	-0.0057486	-0.376847	-0.326222	0.120819	-0.643636	0.88547	0.378487	-0.343895
-4.94888	-0.58689	0.389515	-0.756703	-0.269912	0.422203	0.533305	-0.0328272	-0.591292	0.437986	-0.0902829	-0.489909	-0.00471091	0.0085915	-0.17104	-0.00153242	0.569693	0.303535	-0.190108	0.130707	-0.361246	-0.385783	-0.390215	-0.204647	-0.314731	-0.244723	0.424302	-0.469049	0.506683	0.0749933	-0.144929	0.101943	0.70528	-0.420054	-0.292761	-0.00243563	-0.369303	-0.621455	-0.455591	0.053314	0.132019	-0.365001	-0.00706954	-0.374928	-0.326149	0.122553	-0.643759	0.886298	0.377234	-0.343214
-4.9479	-0.588521	0.387103	-0.756424	-0.270482	0.424205	0.53372	-0.0322217	-0.591805	0.437422	-0.0897312	-0.491228	-0.0048825	0.00904767	-0.172035	-0.00316498	0.569797	0.304393	-0.190295	0.131945	-0.36165	-0.384673	-0.390641	-0.204431	-0.313588	-0.243714	0.425122	-0.467558	0.50624	0.0734495	-0.146064	0.103687	0.707301	-0.418302	-0.290054	-0.00259625	-0.369309	-0.620125	-0.454655	0.0536623	0.132575	-0.362615	-0.00840337	-0.372997	-0.326079	0.124283	-0.64388	0.887101	0.375983	-0.34253
-4.94692	-0.590152	0.384702	-0.756127	-0.271062	0.4262	0.534118	-0.0316237	-0.592312	0.436843	-0.0891804	-0.492549	-0.00505826	0.00949708	-0.17303	-0.00479799	0.56988	0.305235	-0.190475	0.133194	-0.362058	-0.383561	-0.391081	-0.204213	-0.312433	-0.242703	0.425934	-0.466075	0.50579	0.0719156	-0.147194	0.105424	0.709305	-0.416549	-0.287339	-0.00276441	-0.369322	-0.618777	-0.45371	0.0540162	0.133139	-0.360222	-0.00975002	-0.371055	-0.326014	0.12601	-0.643997	0.887879	0.374733	-0.341845
-4.94593	-0.591783	0.382312	-0.755814	-0.27165	0.428188	0.5345	-0.0310332	-0.592815	0.436249	-0.0886306	-0.493873	-0.00523808	0.00993969	-0.174025	-0.00643137	0.569942	0.306062	-0.190648	0.134454	-0.362468	-0.382448	-0.391534	-0.203994	-0.311266	-0.241693	0.426738	-0.464599	0.505331	0.0703915	-0.148319	0.107156	0.711293	-0.414795	-0.284615	-0.00294007	-0.369343	-0.617411	-0.452754	0.0543754	0.13371	-0.357824	-0.0111094	-0.369101	-0.325953	0.127733	-0.644111	0.888632	0.373485	-0.341157
-4.94495	-0.593414	0.379935	-0.755483	-0.272248	0.430169	0.534864	-0.0304506	-0.593313	0.43564	-0.0880818	-0.4952	-0.00542186	0.0103755	-0.175021	-0.00806509	0.569983	0.306871	-0.190812	0.135725	-0.362881	-0.381333	-0.392001	-0.203774	-0.310087	-0.240682	0.427535	-0.46313	0.504866	0.0688773	-0.149439	0.10888	0.713263	-0.41304	-0.281883	-0.0031232	-0.369371	-0.616028	-0.451789	0.0547401	0.134288	-0.35542	-0.0124814	-0.367135	-0.325897	0.129451	-0.644223	0.889361	0.372238	-0.340467
-4.94397	-0.595044	0.377569	-0.755135	-0.272854	0.432142	0.535211	-0.0298759	-0.593807	0.435016	-0.0875342	-0.496529	-0.00560949	0.0108044	-0.176017	-0.00969909	0.570002	0.307665	-0.190969	0.137007	-0.363297	-0.380216	-0.39248	-0.203552	-0.308895	-0.239671	0.428324	-0.461668	0.504393	0.0673731	-0.150553	0.110599	0.715216	-0.411283	-0.279144	-0.00331376	-0.369406	-0.614628	-0.450815	0.0551102	0.134873	-0.353011	-0.013866	-0.365158	-0.325844	0.131166	-0.644331	0.890064	0.370993	-0.339775
-4.94298	-0.596673	0.375214	-0.754769	-0.27347	0.434108	0.535542	-0.0293096	-0.594295	0.434377	-0.0869877	-0.497861	-0.00580088	0.0112265	-0.177013	-0.0113333	0.570001	0.308442	-0.191118	0.1383	-0.363716	-0.379097	-0.392973	-0.203329	-0.307691	-0.23866	0.429105	-0.460214	0.503913	0.065879	-0.151662	0.11231	0.717152	-0.409525	-0.276397	-0.00351171	-0.369448	-0.61321	-0.449832	0.0554857	0.135466	-0.350596	-0.0152631	-0.363169	-0.325796	0.132875	-0.644435	0.890743	0.369751	-0.339081
-4.942	-0.598301	0.372873	-0.754386	-0.274094	0.436067	0.535856	-0.0287516	-0.594779	0.433724	-0.0864426	-0.499196	-0.00599593	0.0116417	-0.17801	-0.0129677	0.569979	0.309202	-0.191259	0.139604	-0.364137	-0.377978	-0.393479	-0.203105	-0.306475	-0.237648	0.429879	-0.458768	0.503427	0.064395	-0.152766	0.114015	0.71907	-0.407765	-0.273643	-0.00371701	-0.369497	-0.611776	-0.44884	0.0558665	0.136065	-0.348176	-0.0166725	-0.361168	-0.325752	0.134581	-0.644537	0.891396	0.36851	-0.338386
-4.94102	-0.599928	0.370543	-0.753986	-0.274728	0.438018	0.536152	-0.0282024	-0.595258	0.433056	-0.0858988	-0.500532	-0.00619453	0.0120499	-0.179006	-0.0146022	0.569935	0.309946	-0.191393	0.14092	-0.364561	-0.376857	-0.393999	-0.202879	-0.305247	-0.236636	0.430644	-0.457329	0.502934	0.0629213	-0.153865	0.115713	0.720971	-0.406004	-0.270881	-0.00392962	-0.369554	-0.610324	-0.447839	0.0562527	0.136672	-0.34575	-0.0180943	-0.359157	-0.325713	0.136281	-0.644635	0.892024	0.367271	-0.337689
-4.94003	-0.601554	0.368226	-0.753569	-0.27537	0.439962	0.536432	-0.027662	-0.595733	0.432373	-0.0853565	-0.501871	-0.00639658	0.0124513	-0.180002	-0.0162367	0.569871	0.310673	-0.191519	0.142247	-0.364987	-0.375734	-0.394531	-0.202652	-0.304006	-0.235623	0.431402	-0.455899	0.502434	0.0614579	-0.154958	0.117405	0.722853	-0.404241	-0.268111	-0.0041495	-0.369617	-0.608855	-0.44683	0.0566442	0.137285	-0.34332	-0.0195282	-0.357134	-0.325678	0.137976	-0.64473	0.892626	0.366035	-0.33699
-4.93905	-0.603178	0.365921	-0.753134	-0.276021	0.441898	0.536695	-0.0271306	-0.596203	0.431675	-0.0848157	-0.503213	-0.00660197	0.0128457	-0.180998	-0.0178712	0.569786	0.311383	-0.191638	0.143586	-0.365416	-0.374611	-0.395077	-0.202424	-0.302754	-0.23461	0.432152	-0.454477	0.501929	0.0600048	-0.156045	0.119089	0.724717	-0.402476	-0.265335	-0.0043766	-0.369688	-0.607369	-0.445811	0.0570411	0.137905	-0.340885	-0.0209743	-0.355099	-0.325647	0.139666	-0.644821	0.893204	0.364801	-0.33629
-4.93807	-0.6048	0.363629	-0.752681	-0.27668	0.443826	0.536942	-0.0266086	-0.596668	0.430963	-0.0842765	-0.504556	-0.00681062	0.0132331	-0.181994	-0.0195057	0.56968	0.312076	-0.191749	0.144936	-0.365847	-0.373486	-0.395636	-0.202194	-0.30149	-0.233596	0.432894	-0.453063	0.501418	0.0585622	-0.157127	0.120766	0.726562	-0.40071	-0.262552	-0.00461087	-0.369765	-0.605867	-0.444785	0.0574431	0.138532	-0.338446	-0.0224324	-0.353054	-0.325621	0.141351	-0.644909	0.893755	0.363569	-0.335588
-4.93709	-0.606421	0.36135	-0.752211	-0.277348	0.445746	0.537172	-0.026096	-0.597128	0.430237	-0.083739	-0.505902	-0.0070224	0.0136136	-0.18299	-0.02114	0.569554	0.312752	-0.191852	0.146298	-0.366281	-0.372361	-0.396208	-0.201963	-0.300214	-0.232582	0.433628	-0.451657	0.500901	0.0571301	-0.158203	0.122436	0.728389	-0.398941	-0.259762	-0.00485228	-0.36985	-0.604348	-0.44375	0.0578505	0.139166	-0.336002	-0.0239025	-0.350997	-0.325599	0.14303	-0.644993	0.894282	0.36234	-0.334885
-4.9361	-0.60804	0.359083	-0.751724	-0.278024	0.447659	0.537384	-0.0255932	-0.597584	0.429496	-0.0832032	-0.507249	-0.00723723	0.0139871	-0.183985	-0.0227741	0.569406	0.313411	-0.191949	0.147672	-0.366717	-0.371234	-0.396793	-0.201731	-0.298926	-0.231568	0.434354	-0.45026	0.500379	0.0557086	-0.159274	0.124098	0.730197	-0.39717	-0.256965	-0.00510076	-0.369941	-0.602813	-0.442708	0.0582631	0.139806	-0.333553	-0.0253843	-0.348929	-0.325581	0.144703	-0.645074	0.894782	0.361113	-0.334181
-4.93512	-0.609656	0.35683	-0.751218	-0.278709	0.449563	0.537581	-0.0251002	-0.598035	0.42874	-0.0826693	-0.508599	-0.007455	0.0143535	-0.18498	-0.024408	0.569238	0.314053	-0.192037	0.149057	-0.367156	-0.370107	-0.397391	-0.201497	-0.297626	-0.230553	0.435072	-0.448872	0.499852	0.0542977	-0.160338	0.125754	0.731986	-0.395398	-0.254162	-0.00535627	-0.37004	-0.601261	-0.441658	0.0586808	0.140453	-0.331101	-0.0268779	-0.34685	-0.325569	0.14637	-0.645151	0.895257	0.359888	-0.333476
-4.93414	-0.61127	0.354591	-0.750696	-0.279402	0.451459	0.53776	-0.0246173	-0.598481	0.427971	-0.0821374	-0.509951	-0.00767561	0.014713	-0.185975	-0.0260416	0.569049	0.314677	-0.192119	0.150454	-0.367597	-0.368979	-0.398002	-0.201261	-0.296314	-0.229537	0.435782	-0.447493	0.49932	0.0528976	-0.161397	0.127401	0.733756	-0.393623	-0.251352	-0.00561876	-0.370145	-0.599693	-0.440599	0.0591038	0.141106	-0.328644	-0.0283831	-0.34476	-0.32556	0.148031	-0.645224	0.895706	0.358667	-0.332769
-4.93315	-0.612881	0.352364	-0.750155	-0.280104	0.453347	0.537923	-0.0241446	-0.598923	0.427187	-0.0816074	-0.511304	-0.00789896	0.0150654	-0.186969	-0.0276748	0.568839	0.315284	-0.192193	0.151862	-0.36804	-0.36785	-0.398626	-0.201024	-0.29499	-0.228521	0.436483	-0.446122	0.498784	0.0515082	-0.16245	0.129042	0.735507	-0.391845	-0.248536	-0.00588817	-0.370257	-0.598108	-0.439534	0.0595319	0.141766	-0.326184	-0.0298998	-0.34266	-0.325556	0.149685	-0.645293	0.89613	0.357448	-0.332062
-4.93217	-0.61449	0.350151	-0.749597	-0.280814	0.455227	0.53807	-0.0236825	-0.59936	0.426389	-0.0810794	-0.512659	-0.00812494	0.0154108	-0.187962	-0.0293075	0.568609	0.315873	-0.19226	0.153283	-0.368486	-0.366721	-0.399263	-0.200785	-0.293655	-0.227505	0.437176	-0.444761	0.498243	0.0501297	-0.163497	0.130674	0.737238	-0.390066	-0.245714	-0.00616445	-0.370375	-0.596508	-0.438461	0.0599652	0.142432	-0.32372	-0.031428	-0.340548	-0.325557	0.151333	-0.645358	0.896527	0.356232	-0.331353
-4.93119	-0.616095	0.347952	-0.749022	-0.281532	0.457098	0.5382	-0.0232309	-0.599793	0.425576	-0.0805537	-0.514016	-0.00835345	0.0157491	-0.188955	-0.0309397	0.568358	0.316444	-0.192319	0.154715	-0.368934	-0.365591	-0.399913	-0.200545	-0.292308	-0.226487	0.437861	-0.443409	0.497698	0.0487621	-0.164538	0.132299	0.738949	-0.388284	-0.242886	-0.00644754	-0.3705	-0.594892	-0.437381	0.0604036	0.143104	-0.321252	-0.0329675	-0.338426	-0.325563	0.152973	-0.64542	0.896899	0.355019	-0.330644
-4.9302	-0.617698	0.345767	-0.748428	-0.282258	0.458961	0.538313	-0.0227903	-0.600221	0.42475	-0.0800301	-0.515375	-0.0085844	0.0160804	-0.189947	-0.0325714	0.568087	0.316998	-0.192372	0.15616	-0.369385	-0.364461	-0.400576	-0.200303	-0.290949	-0.22547	0.438538	-0.442066	0.497149	0.0474055	-0.165573	0.133916	0.74064	-0.386499	-0.240052	-0.00673739	-0.370632	-0.59326	-0.436294	0.0608471	0.143782	-0.318781	-0.0345182	-0.336293	-0.325573	0.154607	-0.645477	0.897245	0.353809	-0.329934
-4.92922	-0.619297	0.343596	-0.747817	-0.282992	0.460815	0.53841	-0.0223606	-0.600644	0.42391	-0.0795088	-0.516735	-0.00881767	0.0164047	-0.190938	-0.0342024	0.567796	0.317534	-0.192417	0.157616	-0.369837	-0.363331	-0.401251	-0.20006	-0.289579	-0.224451	0.439206	-0.440732	0.496596	0.04606	-0.166602	0.135525	0.742311	-0.384711	-0.237212	-0.00703393	-0.37077	-0.591612	-0.4352	0.0612956	0.144467	-0.316307	-0.03608	-0.334149	-0.325588	0.156234	-0.64553	0.897565	0.352601	-0.329223
-4.92824	-0.620892	0.341439	-0.747188	-0.283734	0.462661	0.538491	-0.0219422	-0.601063	0.423056	-0.0789899	-0.518097	-0.00905318	0.0167219	-0.191929	-0.0358327	0.567484	0.318052	-0.192455	0.159084	-0.370292	-0.3622	-0.40194	-0.199814	-0.288197	-0.223432	0.439866	-0.439408	0.49604	0.0447255	-0.167624	0.137126	0.743962	-0.382921	-0.234367	-0.0073371	-0.370915	-0.589949	-0.4341	0.0617492	0.145157	-0.31383	-0.0376528	-0.331995	-0.325607	0.157853	-0.645579	0.897859	0.351397	-0.328511
-4.92726	-0.622484	0.339296	-0.746541	-0.284484	0.464498	0.538555	-0.0215352	-0.601477	0.422188	-0.0784734	-0.51946	-0.00929081	0.017032	-0.192918	-0.0374623	0.567151	0.318552	-0.192485	0.160565	-0.370749	-0.361069	-0.402641	-0.199568	-0.286804	-0.222412	0.440517	-0.438094	0.49548	0.0434023	-0.168641	0.138719	0.745593	-0.381128	-0.231516	-0.00764685	-0.371066	-0.588271	-0.432993	0.0622078	0.145853	-0.311349	-0.0392365	-0.32983	-0.325632	0.159464	-0.645624	0.898126	0.350197	-0.327799
-4.92627	-0.624073	0.337168	-0.745877	-0.285241	0.466326	0.538603	-0.0211398	-0.601886	0.421306	-0.0779594	-0.520824	-0.00953047	0.0173351	-0.193906	-0.039091	0.566799	0.319034	-0.192509	0.162057	-0.371208	-0.359938	-0.403354	-0.199319	-0.285399	-0.221391	0.44116	-0.43679	0.494917	0.0420902	-0.169651	0.140304	0.747203	-0.379332	-0.22866	-0.0079631	-0.371223	-0.586577	-0.43188	0.0626713	0.146555	-0.308866	-0.040831	-0.327655	-0.325661	0.161068	-0.645665	0.898368	0.348999	-0.327087
-4.92529	-0.625657	0.335054	-0.745194	-0.286007	0.468145	0.538635	-0.0207561	-0.602291	0.420411	-0.0774479	-0.52219	-0.00977206	0.0176311	-0.194894	-0.0407188	0.566426	0.319498	-0.192526	0.163562	-0.37167	-0.358807	-0.404081	-0.199069	-0.283983	-0.22037	0.441795	-0.435495	0.494352	0.0407895	-0.170654	0.141881	0.748792	-0.377533	-0.225799	-0.0082858	-0.371387	-0.584868	-0.430761	0.0631399	0.147262	-0.306381	-0.0424361	-0.325469	-0.325695	0.162664	-0.645701	0.898584	0.347805	-0.326374
-4.92431	-0.627237	0.332954	-0.744494	-0.28678	0.469955	0.53865	-0.0203843	-0.602691	0.419502	-0.0769391	-0.523557	-0.0100155	0.0179201	-0.19588	-0.0423456	0.566033	0.319944	-0.192536	0.165079	-0.372133	-0.357676	-0.40482	-0.198817	-0.282556	-0.219348	0.442421	-0.434211	0.493784	0.0395001	-0.171652	0.143449	0.75036	-0.375731	-0.222933	-0.00861487	-0.371557	-0.583144	-0.429636	0.0636134	0.147975	-0.303893	-0.0440518	-0.323274	-0.325734	0.164251	-0.645733	0.898773	0.346614	-0.325661
-4.92332	-0.628812	0.33087	-0.743776	-0.287561	0.471757	0.538649	-0.0200247	-0.603087	0.418579	-0.0764331	-0.524925	-0.0102606	0.018202	-0.196864	-0.0439714	0.56562	0.320371	-0.192539	0.166608	-0.372599	-0.356545	-0.405571	-0.198563	-0.281117	-0.218325	0.443038	-0.432936	0.493214	0.0382221	-0.172643	0.145009	0.751908	-0.373926	-0.220061	-0.00895026	-0.371733	-0.581406	-0.428505	0.0640918	0.148693	-0.301403	-0.0456779	-0.321068	-0.325777	0.16583	-0.645761	0.898937	0.345427	-0.324947
-4.92234	-0.630383	0.328801	-0.743041	-0.288349	0.473549	0.538633	-0.0196773	-0.603478	0.417643	-0.0759297	-0.526295	-0.0105074	0.0184768	-0.197848	-0.045596	0.565187	0.32078	-0.192535	0.168149	-0.373066	-0.355415	-0.406334	-0.198307	-0.279667	-0.217302	0.443647	-0.431673	0.492641	0.0369556	-0.173627	0.14656	0.753434	-0.372117	-0.217185	-0.00929188	-0.371916	-0.579652	-0.427368	0.0645751	0.149417	-0.298911	-0.0473143	-0.318852	-0.325826	0.1674	-0.645784	0.899074	0.344243	-0.324234
-4.92136	-0.63195	0.326746	-0.742287	-0.289145	0.475332	0.5386	-0.0193424	-0.603865	0.416693	-0.0754293	-0.527665	-0.0107556	0.0187446	-0.19883	-0.0472195	0.564734	0.321171	-0.192524	0.169702	-0.373536	-0.354285	-0.40711	-0.19805	-0.278206	-0.216278	0.444247	-0.430419	0.492067	0.0357007	-0.174605	0.148103	0.754939	-0.370305	-0.214305	-0.00963968	-0.372104	-0.577884	-0.426227	0.0650632	0.150146	-0.296417	-0.0489609	-0.316626	-0.325879	0.168962	-0.645803	0.899185	0.343064	-0.32352
-4.92037	-0.633511	0.324707	-0.741515	-0.289948	0.477106	0.53855	-0.0190201	-0.604247	0.415731	-0.0749317	-0.529036	-0.0110054	0.0190054	-0.199811	-0.0488416	0.564262	0.321543	-0.192507	0.171268	-0.374008	-0.353155	-0.407899	-0.19779	-0.276734	-0.215252	0.444838	-0.429176	0.491491	0.0344573	-0.175576	0.149637	0.756422	-0.36849	-0.21142	-0.00999358	-0.372298	-0.576102	-0.42508	0.0655562	0.15088	-0.293921	-0.0506176	-0.31439	-0.325938	0.170514	-0.645816	0.899269	0.341887	-0.322807
-4.91939	-0.635068	0.322683	-0.740726	-0.290758	0.47887	0.538485	-0.0187105	-0.604624	0.414754	-0.0744371	-0.530408	-0.0112564	0.0192592	-0.20079	-0.0504625	0.563769	0.321896	-0.192482	0.172846	-0.374481	-0.352026	-0.408699	-0.197529	-0.27525	-0.214226	0.445421	-0.427944	0.490913	0.0332256	-0.17654	0.151163	0.757884	-0.36667	-0.20853	-0.0103535	-0.372498	-0.574305	-0.423927	0.066054	0.15162	-0.291423	-0.0522843	-0.312144	-0.326001	0.172058	-0.645826	0.899327	0.340715	-0.322093
-4.91841	-0.636619	0.320675	-0.739918	-0.291576	0.480625	0.538404	-0.0184139	-0.604997	0.413765	-0.0739456	-0.531781	-0.0115086	0.0195059	-0.201768	-0.0520819	0.563257	0.322231	-0.192451	0.174436	-0.374957	-0.350897	-0.409511	-0.197266	-0.273756	-0.213199	0.445995	-0.426722	0.490335	0.0320056	-0.177498	0.152679	0.759324	-0.364848	-0.205636	-0.0107194	-0.372704	-0.572495	-0.42277	0.0665565	0.152364	-0.288925	-0.0539608	-0.309888	-0.326069	0.173592	-0.64583	0.89936	0.339546	-0.32138
-4.91742	-0.638165	0.318682	-0.739093	-0.292401	0.482371	0.538308	-0.0181304	-0.605365	0.412763	-0.0734572	-0.533154	-0.011762	0.0197456	-0.202744	-0.0536999	0.562725	0.322547	-0.192414	0.176039	-0.375434	-0.349769	-0.410336	-0.197001	-0.27225	-0.212171	0.44656	-0.425511	0.489755	0.0307974	-0.178449	0.154187	0.760743	-0.363021	-0.202738	-0.0110911	-0.372916	-0.57067	-0.421609	0.0670638	0.153113	-0.286425	-0.055647	-0.307623	-0.326143	0.175116	-0.64583	0.899365	0.338381	-0.320667
-4.91644	-0.639706	0.316705	-0.73825	-0.293233	0.484107	0.538195	-0.0178601	-0.605729	0.411747	-0.0729719	-0.534528	-0.0120164	0.0199783	-0.203718	-0.0553163	0.562174	0.322845	-0.19237	0.177654	-0.375914	-0.348642	-0.411172	-0.196734	-0.270734	-0.211143	0.447117	-0.424311	0.489174	0.0296009	-0.179394	0.155686	0.762139	-0.361191	-0.199837	-0.0114687	-0.373133	-0.568831	-0.420443	0.0675759	0.153866	-0.283924	-0.0573428	-0.305349	-0.326221	0.17663	-0.645825	0.899345	0.337221	-0.319954
-4.91546	-0.641241	0.314743	-0.737389	-0.294072	0.485833	0.538066	-0.0176032	-0.606088	0.410719	-0.0724898	-0.535903	-0.0122718	0.0202041	-0.204691	-0.056931	0.561603	0.323124	-0.192319	0.179282	-0.376395	-0.347516	-0.412021	-0.196465	-0.269207	-0.210113	0.447664	-0.423122	0.488593	0.0284164	-0.180331	0.157176	0.763513	-0.359356	-0.196931	-0.0118519	-0.373356	-0.566979	-0.419272	0.0680926	0.154624	-0.281422	-0.0590481	-0.303064	-0.326305	0.178135	-0.645815	0.899298	0.336064	-0.319241
-4.91448	-0.64277	0.312798	-0.73651	-0.294918	0.487549	0.537922	-0.0173599	-0.606443	0.409677	-0.072011	-0.537278	-0.0125279	0.0204229	-0.205662	-0.058544	0.561013	0.323384	-0.192261	0.180922	-0.376878	-0.346391	-0.412881	-0.196193	-0.267669	-0.209082	0.448203	-0.421945	0.488011	0.0272438	-0.181262	0.158657	0.764865	-0.357518	-0.194022	-0.0122409	-0.373584	-0.565114	-0.418098	0.068614	0.155387	-0.278919	-0.0607627	-0.300771	-0.326394	0.179629	-0.6458	0.899225	0.334912	-0.318529
-4.91349	-0.644293	0.310869	-0.735614	-0.295771	0.489256	0.537762	-0.0171303	-0.606793	0.408623	-0.0715356	-0.538653	-0.0127848	0.0206347	-0.20663	-0.0601553	0.560404	0.323625	-0.192198	0.182574	-0.377363	-0.345267	-0.413753	-0.19592	-0.26612	-0.208051	0.448733	-0.420778	0.48743	0.0260831	-0.182185	0.160129	0.766195	-0.355675	-0.191109	-0.0126353	-0.373818	-0.563235	-0.416919	0.0691401	0.156154	-0.276416	-0.0624866	-0.298468	-0.326488	0.181113	-0.64578	0.899125	0.333763	-0.317818
-4.91251	-0.64581	0.308956	-0.734699	-0.29663	0.490953	0.537587	-0.0169145	-0.607139	0.407556	-0.0710636	-0.540029	-0.0130423	0.0208396	-0.207597	-0.0617646	0.559775	0.323847	-0.192128	0.184239	-0.37785	-0.344144	-0.414636	-0.195645	-0.264561	-0.207018	0.449254	-0.419623	0.486848	0.0249345	-0.183102	0.161591	0.767502	-0.353828	-0.188192	-0.0130353	-0.374057	-0.561343	-0.415737	0.0696707	0.156925	-0.273913	-0.0642195	-0.296155	-0.326587	0.182586	-0.645755	0.899	0.332619	-0.317107
-4.91153	-0.647321	0.307059	-0.733766	-0.297497	0.49264	0.537396	-0.0167127	-0.60748	0.406477	-0.070595	-0.541405	-0.0133004	0.0210375	-0.208562	-0.0633721	0.559128	0.32405	-0.192051	0.185916	-0.378339	-0.343022	-0.415531	-0.195368	-0.262991	-0.205984	0.449766	-0.41848	0.486267	0.023798	-0.184012	0.163045	0.768787	-0.351977	-0.185272	-0.0134407	-0.374302	-0.559437	-0.414551	0.070206	0.157701	-0.271409	-0.0659614	-0.293834	-0.326691	0.184049	-0.645724	0.898848	0.33148	-0.316397
-4.91054	-0.648825	0.305179	-0.732816	-0.29837	0.494317	0.53719	-0.016525	-0.607816	0.405384	-0.07013	-0.54278	-0.0135589	0.0212286	-0.209524	-0.0649774	0.558461	0.324235	-0.191968	0.187606	-0.378829	-0.341901	-0.416438	-0.195088	-0.261411	-0.204949	0.450269	-0.417348	0.485686	0.0226736	-0.184915	0.164488	0.770049	-0.350122	-0.182349	-0.0138513	-0.374552	-0.557519	-0.413362	0.0707457	0.15848	-0.268905	-0.0677121	-0.291504	-0.326801	0.1855	-0.645689	0.898669	0.330344	-0.315688
-4.90956	-0.650323	0.303315	-0.731848	-0.29925	0.495984	0.536968	-0.0163515	-0.608148	0.40428	-0.0696685	-0.544156	-0.0138177	0.0214128	-0.210484	-0.0665807	0.557776	0.3244	-0.191879	0.189308	-0.379321	-0.340782	-0.417355	-0.194807	-0.259819	-0.203913	0.450764	-0.416227	0.485105	0.0215614	-0.18581	0.165923	0.771288	-0.348262	-0.179423	-0.0142672	-0.374806	-0.555588	-0.41217	0.0712901	0.159263	-0.266402	-0.0694715	-0.289164	-0.326915	0.186941	-0.645648	0.898464	0.329213	-0.314979
-4.90858	-0.651813	0.301468	-0.730862	-0.300136	0.497641	0.53673	-0.0161925	-0.608476	0.403163	-0.0692107	-0.545532	-0.0140768	0.0215902	-0.211442	-0.0681818	0.557072	0.324546	-0.191784	0.191023	-0.379815	-0.339665	-0.418284	-0.194523	-0.258218	-0.202876	0.451249	-0.415119	0.484526	0.0204615	-0.186699	0.167348	0.772505	-0.346397	-0.176495	-0.0146883	-0.375066	-0.553645	-0.410974	0.0718389	0.16005	-0.263899	-0.0712394	-0.286816	-0.327036	0.18837	-0.645602	0.898234	0.328087	-0.314271
-4.90759	-0.653297	0.299638	-0.729858	-0.301029	0.499287	0.536478	-0.016048	-0.608799	0.402033	-0.0687565	-0.546908	-0.014336	0.0217607	-0.212398	-0.0697806	0.556349	0.324673	-0.191683	0.19275	-0.380311	-0.338549	-0.419224	-0.194237	-0.256606	-0.201838	0.451725	-0.414022	0.483947	0.0193738	-0.18758	0.168764	0.773698	-0.344528	-0.173563	-0.0151144	-0.375331	-0.551689	-0.409776	0.0723921	0.160841	-0.261396	-0.0730158	-0.284459	-0.327161	0.189788	-0.645551	0.897976	0.326965	-0.313565
-4.90661	-0.654774	0.297824	-0.728836	-0.301928	0.500924	0.53621	-0.0159181	-0.609117	0.400892	-0.0683061	-0.548284	-0.0145953	0.0219244	-0.213351	-0.071377	0.555608	0.324781	-0.191575	0.19449	-0.380808	-0.337434	-0.420176	-0.193948	-0.254984	-0.200799	0.452193	-0.412937	0.48337	0.0182985	-0.188454	0.17017	0.774868	-0.342654	-0.170628	-0.0155454	-0.375601	-0.549722	-0.408575	0.0729498	0.161635	-0.258894	-0.0748005	-0.282094	-0.327292	0.191194	-0.645494	0.897693	0.325848	-0.312859
-4.90563	-0.656244	0.296028	-0.727796	-0.302833	0.502549	0.535927	-0.015803	-0.609431	0.399738	-0.0678594	-0.549659	-0.0148545	0.0220813	-0.214302	-0.072971	0.554848	0.32487	-0.191462	0.196242	-0.381307	-0.336322	-0.421138	-0.193658	-0.253352	-0.199758	0.452651	-0.411864	0.482795	0.0172356	-0.189321	0.171566	0.776016	-0.340775	-0.167691	-0.0159814	-0.375875	-0.547742	-0.407372	0.073512	0.162432	-0.256393	-0.0765934	-0.27972	-0.327428	0.192588	-0.645432	0.897383	0.324735	-0.312154
-4.90465	-0.657707	0.294249	-0.726739	-0.303745	0.504165	0.535629	-0.0157028	-0.60974	0.398572	-0.0674166	-0.551034	-0.0151136	0.0222315	-0.21525	-0.0745624	0.55407	0.324939	-0.191342	0.198007	-0.381808	-0.335211	-0.42211	-0.193365	-0.251709	-0.198717	0.4531	-0.410803	0.482221	0.0161851	-0.190181	0.172953	0.77714	-0.338891	-0.164752	-0.0164221	-0.376154	-0.54575	-0.406166	0.0740784	0.163232	-0.253893	-0.0783943	-0.277338	-0.327569	0.19397	-0.645364	0.897047	0.323627	-0.311451
-4.90366	-0.659161	0.292487	-0.725664	-0.304663	0.50577	0.535315	-0.0156176	-0.610045	0.397394	-0.0669777	-0.552408	-0.0153725	0.022375	-0.216196	-0.0761513	0.553273	0.32499	-0.191217	0.199784	-0.382311	-0.334102	-0.423094	-0.19307	-0.250056	-0.197674	0.45354	-0.409755	0.481649	0.0151471	-0.191033	0.17433	0.778241	-0.337002	-0.161811	-0.0168675	-0.376438	-0.543746	-0.404959	0.0746493	0.164036	-0.251394	-0.080203	-0.274947	-0.327716	0.195339	-0.645291	0.896685	0.322524	-0.310749
-4.90268	-0.660609	0.290742	-0.724571	-0.305587	0.507364	0.534987	-0.0155476	-0.610346	0.396204	-0.0665427	-0.553782	-0.015631	0.0225117	-0.217139	-0.0777374	0.552458	0.325021	-0.191086	0.201573	-0.382814	-0.332996	-0.424088	-0.192772	-0.248394	-0.19663	0.453972	-0.408718	0.481079	0.0141216	-0.191879	0.175697	0.779318	-0.335108	-0.158867	-0.0173176	-0.376726	-0.541731	-0.403749	0.0752244	0.164843	-0.248896	-0.0820196	-0.272548	-0.327869	0.196697	-0.645212	0.896297	0.321426	-0.310048
-4.9017	-0.662048	0.289015	-0.72346	-0.306516	0.508948	0.534644	-0.0154928	-0.610641	0.395002	-0.0661116	-0.555155	-0.0158891	0.0226418	-0.218079	-0.0793208	0.551626	0.325033	-0.190949	0.203375	-0.38332	-0.331891	-0.425093	-0.192472	-0.246721	-0.195584	0.454394	-0.407694	0.480511	0.0131087	-0.192716	0.177054	0.780372	-0.333209	-0.155921	-0.0177721	-0.377019	-0.539705	-0.402538	0.0758038	0.165652	-0.246401	-0.0838437	-0.270141	-0.328027	0.198041	-0.645127	0.895882	0.320333	-0.309349
-4.90071	-0.66348	0.287306	-0.722332	-0.307452	0.510521	0.534286	-0.0154533	-0.610933	0.393788	-0.0656846	-0.556527	-0.0161466	0.0227653	-0.219017	-0.0809013	0.550775	0.325025	-0.190806	0.20519	-0.383827	-0.330788	-0.426108	-0.19217	-0.245039	-0.194537	0.454807	-0.406683	0.479946	0.0121085	-0.193547	0.178401	0.781403	-0.331304	-0.152973	-0.018231	-0.377316	-0.537668	-0.401325	0.0763875	0.166464	-0.243906	-0.0856753	-0.267725	-0.32819	0.199373	-0.645037	0.895442	0.319245	-0.308651
-4.89973	-0.664904	0.285614	-0.721186	-0.308394	0.512083	0.533913	-0.0154294	-0.611219	0.392563	-0.0652617	-0.557899	-0.0164036	0.0228822	-0.219951	-0.0824788	0.549907	0.324998	-0.190657	0.207017	-0.384336	-0.329688	-0.427133	-0.191866	-0.243346	-0.193489	0.455211	-0.405684	0.479384	0.0111209	-0.19437	0.179739	0.782409	-0.329395	-0.150024	-0.0186943	-0.377617	-0.535619	-0.400111	0.0769754	0.167278	-0.241414	-0.0875143	-0.265302	-0.328359	0.200692	-0.64494	0.894975	0.318162	-0.307955
-4.89875	-0.666319	0.283939	-0.720022	-0.309342	0.513635	0.533526	-0.015421	-0.611502	0.391326	-0.0648428	-0.559269	-0.0166598	0.0229925	-0.220883	-0.0840532	0.549021	0.324952	-0.190503	0.208856	-0.384846	-0.32859	-0.428168	-0.191558	-0.241644	-0.19244	0.455606	-0.404698	0.478824	0.0101461	-0.195185	0.181066	0.783393	-0.327479	-0.147073	-0.0191618	-0.377923	-0.53356	-0.398895	0.0775675	0.168095	-0.238924	-0.0893604	-0.262872	-0.328533	0.201997	-0.644838	0.894482	0.317083	-0.30726
-4.89776	-0.667726	0.282283	-0.718841	-0.310295	0.515175	0.533124	-0.0154282	-0.611779	0.390078	-0.0644282	-0.560639	-0.0169153	0.0230963	-0.221811	-0.0856246	0.548117	0.324887	-0.190343	0.210708	-0.385358	-0.327495	-0.429214	-0.191249	-0.239932	-0.191389	0.455992	-0.403724	0.478267	0.00918402	-0.195993	0.182383	0.784352	-0.325558	-0.14412	-0.0196334	-0.378232	-0.53149	-0.397679	0.0781637	0.168915	-0.236436	-0.0912136	-0.260433	-0.328713	0.20329	-0.64473	0.893964	0.31601	-0.306567
-4.89678	-0.669125	0.280645	-0.717642	-0.311254	0.516705	0.532707	-0.0154512	-0.612053	0.388818	-0.0640177	-0.562007	-0.0171698	0.0231936	-0.222737	-0.0871927	0.547196	0.324802	-0.190178	0.212572	-0.385871	-0.326402	-0.430269	-0.190937	-0.238211	-0.190336	0.456369	-0.402763	0.477714	0.00823476	-0.196794	0.183691	0.785288	-0.323632	-0.141166	-0.020109	-0.378546	-0.529409	-0.396462	0.0787641	0.169736	-0.233951	-0.0930737	-0.257987	-0.328899	0.204569	-0.644616	0.893419	0.314942	-0.305876
-4.8958	-0.670515	0.279025	-0.716425	-0.312218	0.518224	0.532276	-0.0154901	-0.612321	0.387547	-0.0636114	-0.563374	-0.0174234	0.0232845	-0.223659	-0.0887575	0.546258	0.324698	-0.190007	0.214449	-0.386386	-0.325312	-0.431334	-0.190622	-0.236479	-0.189283	0.456736	-0.401815	0.477164	0.00729836	-0.197587	0.184988	0.7862	-0.3217	-0.138211	-0.0205886	-0.378863	-0.527319	-0.395245	0.0793686	0.170559	-0.231468	-0.0949406	-0.255534	-0.32909	0.205834	-0.644496	0.892849	0.31388	-0.305187
-4.89481	-0.671896	0.277423	-0.715191	-0.313188	0.519731	0.531831	-0.0155449	-0.612585	0.386264	-0.0632094	-0.56474	-0.0176759	0.0233689	-0.224578	-0.0903188	0.545302	0.324575	-0.18983	0.216337	-0.386902	-0.324225	-0.432408	-0.190305	-0.234739	-0.188227	0.457095	-0.40088	0.476618	0.00637486	-0.198373	0.186274	0.787089	-0.319762	-0.135254	-0.0210719	-0.379184	-0.525218	-0.394026	0.0799771	0.171384	-0.228988	-0.0968141	-0.253073	-0.329287	0.207085	-0.64437	0.892252	0.312822	-0.304499
-4.89383	-0.673269	0.275839	-0.71394	-0.314164	0.521228	0.531371	-0.0156158	-0.612845	0.384971	-0.0628117	-0.566105	-0.0179272	0.023447	-0.225494	-0.0918767	0.54433	0.324432	-0.189649	0.218239	-0.38742	-0.32314	-0.433492	-0.189985	-0.232989	-0.187171	0.457444	-0.399957	0.476075	0.00546431	-0.199151	0.187551	0.787953	-0.317818	-0.132297	-0.021559	-0.379509	-0.523108	-0.392808	0.0805896	0.172211	-0.226511	-0.0986941	-0.250605	-0.32949	0.208322	-0.644238	0.89163	0.31177	-0.303813
-4.89285	-0.674633	0.274273	-0.712671	-0.315145	0.522713	0.530896	-0.0157028	-0.6131	0.383666	-0.0624184	-0.567468	-0.0181772	0.0235188	-0.226406	-0.093431	0.54334	0.32427	-0.189461	0.220152	-0.387939	-0.322059	-0.434586	-0.189663	-0.23123	-0.186112	0.457785	-0.399048	0.475536	0.00456676	-0.199921	0.188817	0.788794	-0.315868	-0.129338	-0.0220497	-0.379837	-0.520987	-0.39159	0.0812062	0.173039	-0.224038	-0.10058	-0.248129	-0.329698	0.209545	-0.6441	0.890982	0.310723	-0.30313
-4.89187	-0.675987	0.272726	-0.711385	-0.316131	0.524187	0.530408	-0.015806	-0.613351	0.38235	-0.0620294	-0.56883	-0.018426	0.0235843	-0.227315	-0.0949815	0.542334	0.324088	-0.189269	0.222078	-0.38846	-0.32098	-0.435688	-0.189338	-0.229461	-0.185053	0.458116	-0.398152	0.475002	0.00368224	-0.200684	0.190073	0.78961	-0.313912	-0.126379	-0.0225439	-0.380169	-0.518858	-0.390372	0.0818267	0.173869	-0.221567	-0.102473	-0.245647	-0.329912	0.210754	-0.643955	0.890308	0.309682	-0.302448
-4.89088	-0.677333	0.271198	-0.710081	-0.317122	0.525649	0.529905	-0.0159255	-0.613597	0.381023	-0.0616448	-0.57019	-0.0186732	0.0236435	-0.228221	-0.0965283	0.541311	0.323887	-0.189072	0.224016	-0.388982	-0.319904	-0.4368	-0.18901	-0.227683	-0.183991	0.458438	-0.397268	0.474472	0.0028108	-0.201439	0.191319	0.790403	-0.31195	-0.123419	-0.0230416	-0.380504	-0.516719	-0.389154	0.0824511	0.1747	-0.219101	-0.104372	-0.243158	-0.330132	0.211948	-0.643804	0.889609	0.308646	-0.301769
-4.8899	-0.678669	0.269688	-0.70876	-0.318119	0.5271	0.529389	-0.0160614	-0.613838	0.379686	-0.0612647	-0.571548	-0.018919	0.0236966	-0.229123	-0.0980713	0.540271	0.323667	-0.188869	0.225966	-0.389506	-0.318832	-0.43792	-0.18868	-0.225897	-0.182928	0.458752	-0.396399	0.473946	0.00195247	-0.202186	0.192554	0.791172	-0.309982	-0.120459	-0.0235425	-0.380842	-0.51457	-0.387937	0.0830794	0.175532	-0.216637	-0.106276	-0.240662	-0.330358	0.213127	-0.643647	0.888884	0.307616	-0.301092
-4.88892	-0.679995	0.268197	-0.707422	-0.31912	0.52854	0.528858	-0.0162137	-0.614075	0.378338	-0.060889	-0.572904	-0.0191631	0.0237435	-0.230022	-0.0996102	0.539215	0.323428	-0.188661	0.227928	-0.390031	-0.317763	-0.439049	-0.188347	-0.224101	-0.181864	0.459056	-0.395542	0.473425	0.00110732	-0.202926	0.193779	0.791916	-0.308007	-0.117498	-0.0240467	-0.381184	-0.512413	-0.38672	0.0837116	0.176365	-0.214178	-0.108186	-0.23816	-0.330589	0.214292	-0.643484	0.888134	0.306591	-0.300417
-4.88793	-0.681312	0.266725	-0.706066	-0.320127	0.529968	0.528314	-0.0163825	-0.614307	0.376979	-0.0605179	-0.574259	-0.0194055	0.0237843	-0.230916	-0.101145	0.538143	0.323169	-0.188448	0.229903	-0.390557	-0.316697	-0.440187	-0.188011	-0.222296	-0.180798	0.459351	-0.394699	0.472909	0.000275363	-0.203658	0.194993	0.792637	-0.306026	-0.114537	-0.0245539	-0.381528	-0.510248	-0.385505	0.0843476	0.177198	-0.211723	-0.110102	-0.235651	-0.330826	0.215441	-0.643314	0.887358	0.305572	-0.299744
-4.88695	-0.68262	0.265272	-0.704693	-0.321138	0.531385	0.527755	-0.0165678	-0.614535	0.375609	-0.0601512	-0.575611	-0.0196461	0.023819	-0.231808	-0.102676	0.537055	0.322891	-0.18823	0.231889	-0.391085	-0.315635	-0.441334	-0.187673	-0.220482	-0.17973	0.459637	-0.393869	0.472397	-0.000543344	-0.204382	0.196196	0.793333	-0.304039	-0.111575	-0.0250641	-0.381876	-0.508073	-0.38429	0.0849874	0.178033	-0.209272	-0.112023	-0.233136	-0.331069	0.216576	-0.643137	0.886557	0.304558	-0.299074
-4.88597	-0.683918	0.263837	-0.703303	-0.322155	0.53279	0.527183	-0.0167698	-0.614758	0.374229	-0.0597891	-0.576962	-0.0198848	0.0238477	-0.232695	-0.104202	0.53595	0.322594	-0.188008	0.233888	-0.391614	-0.314576	-0.442488	-0.187331	-0.21866	-0.17866	0.459914	-0.393052	0.471891	-0.00134876	-0.205099	0.197389	0.794006	-0.302045	-0.108614	-0.0255772	-0.382226	-0.505891	-0.383077	0.0856309	0.178867	-0.206826	-0.11395	-0.230614	-0.331318	0.217695	-0.642955	0.88573	0.30355	-0.298407
-4.88498	-0.685205	0.262422	-0.701896	-0.323176	0.534183	0.526597	-0.0169885	-0.614977	0.372838	-0.0594316	-0.57831	-0.0201216	0.0238705	-0.233579	-0.105724	0.53483	0.322278	-0.18778	0.235898	-0.392144	-0.313521	-0.443651	-0.186987	-0.216829	-0.177589	0.460181	-0.392249	0.47139	-0.00214085	-0.205808	0.198572	0.794654	-0.300045	-0.105653	-0.0260931	-0.382579	-0.5037	-0.381865	0.0862782	0.179702	-0.204384	-0.115882	-0.228086	-0.331573	0.218798	-0.642765	0.884878	0.302548	-0.297741
-4.884	-0.686483	0.261026	-0.700472	-0.324202	0.535565	0.525998	-0.0172239	-0.615191	0.371438	-0.0590786	-0.579655	-0.0203563	0.0238874	-0.234458	-0.107242	0.533694	0.321942	-0.187547	0.237921	-0.392676	-0.31247	-0.444822	-0.186641	-0.214989	-0.176516	0.46044	-0.391459	0.470895	-0.00291957	-0.206509	0.199743	0.795279	-0.298038	-0.102692	-0.0266116	-0.382935	-0.501501	-0.380655	0.0869292	0.180538	-0.201947	-0.117818	-0.225553	-0.331834	0.219886	-0.642569	0.884001	0.301551	-0.297079
-4.88302	-0.687751	0.259649	-0.699031	-0.325233	0.536934	0.525385	-0.0174761	-0.615401	0.370027	-0.0587303	-0.580999	-0.0205889	0.0238985	-0.235334	-0.108755	0.532543	0.321587	-0.18731	0.239955	-0.393209	-0.311422	-0.446001	-0.186291	-0.213141	-0.175441	0.46069	-0.390683	0.470405	-0.00368488	-0.207202	0.200904	0.795879	-0.296024	-0.0997307	-0.0271327	-0.383293	-0.499295	-0.379446	0.0875838	0.181373	-0.199515	-0.11976	-0.223013	-0.332101	0.220958	-0.642367	0.883099	0.30056	-0.296419
-4.88204	-0.689008	0.258291	-0.697573	-0.326268	0.538292	0.524759	-0.0177452	-0.615606	0.368605	-0.0583866	-0.58234	-0.0208192	0.0239038	-0.236206	-0.110263	0.531376	0.321213	-0.187068	0.242002	-0.393743	-0.310378	-0.447188	-0.185938	-0.211284	-0.174365	0.460931	-0.389921	0.469921	-0.00443675	-0.207888	0.202055	0.796455	-0.294004	-0.0967703	-0.0276562	-0.383654	-0.497081	-0.37824	0.0882421	0.182208	-0.197088	-0.121706	-0.220468	-0.332374	0.222014	-0.642157	0.882171	0.299575	-0.295762
-4.88105	-0.690255	0.256953	-0.696098	-0.327308	0.539638	0.524119	-0.0180312	-0.615806	0.367174	-0.0580475	-0.583678	-0.0210472	0.0239033	-0.237074	-0.111767	0.530194	0.32082	-0.186822	0.24406	-0.394279	-0.309339	-0.448382	-0.185583	-0.209419	-0.173287	0.461163	-0.389172	0.469443	-0.00517512	-0.208566	0.203194	0.797007	-0.291976	-0.0938104	-0.028182	-0.384016	-0.494859	-0.377036	0.0889039	0.183043	-0.194666	-0.123657	-0.217917	-0.332652	0.223054	-0.641941	0.881219	0.298596	-0.295107
-4.88007	-0.691492	0.255634	-0.694606	-0.328352	0.540972	0.523466	-0.0183341	-0.616002	0.365733	-0.0577131	-0.585014	-0.0212728	0.0238971	-0.237937	-0.113266	0.528997	0.320408	-0.18657	0.24613	-0.394816	-0.308303	-0.449583	-0.185224	-0.207545	-0.172206	0.461386	-0.388437	0.468971	-0.00589996	-0.209235	0.204323	0.797536	-0.289942	-0.0908511	-0.0287101	-0.384382	-0.492631	-0.375834	0.0895693	0.183877	-0.19225	-0.125613	-0.215361	-0.332937	0.224077	-0.641718	0.880242	0.297623	-0.294456
-4.87909	-0.692718	0.254335	-0.693098	-0.329401	0.542294	0.5228	-0.0186539	-0.616194	0.364282	-0.0573834	-0.586347	-0.021496	0.0238854	-0.238797	-0.11476	0.527785	0.319976	-0.186315	0.248211	-0.395354	-0.307272	-0.450792	-0.184863	-0.205664	-0.171124	0.4616	-0.387716	0.468505	-0.00661124	-0.209897	0.205441	0.79804	-0.287901	-0.0878926	-0.0292402	-0.384749	-0.490396	-0.374635	0.0902382	0.184711	-0.189839	-0.127572	-0.212799	-0.333228	0.225085	-0.641489	0.87924	0.296656	-0.293807
-4.8781	-0.693934	0.253056	-0.691573	-0.330454	0.543604	0.522121	-0.0189908	-0.61638	0.362821	-0.0570584	-0.587677	-0.0217166	0.023868	-0.239652	-0.116248	0.526558	0.319526	-0.186055	0.250304	-0.395893	-0.306245	-0.452008	-0.184499	-0.203774	-0.17004	0.461805	-0.387008	0.468046	-0.00730891	-0.210552	0.206548	0.79852	-0.285852	-0.084935	-0.0297723	-0.385118	-0.488153	-0.373438	0.0909106	0.185543	-0.187435	-0.129536	-0.210232	-0.333525	0.226075	-0.641252	0.878213	0.295694	-0.293162
-4.87712	-0.695139	0.251796	-0.690031	-0.331511	0.544901	0.521429	-0.0193447	-0.616563	0.36135	-0.0567381	-0.589004	-0.0219345	0.0238452	-0.240503	-0.117732	0.525317	0.319057	-0.18579	0.252409	-0.396434	-0.305222	-0.45323	-0.184131	-0.201876	-0.168954	0.462001	-0.386315	0.467593	-0.00799293	-0.211198	0.207645	0.798976	-0.283797	-0.0819783	-0.0303064	-0.385489	-0.485905	-0.372245	0.0915864	0.186375	-0.185036	-0.131503	-0.20766	-0.333828	0.227049	-0.641009	0.877162	0.294739	-0.292519
-4.87614	-0.696333	0.250556	-0.688472	-0.332572	0.546187	0.520724	-0.0197157	-0.61674	0.35987	-0.0564225	-0.590328	-0.0221497	0.0238169	-0.24135	-0.11921	0.52406	0.318568	-0.185521	0.254525	-0.396976	-0.304203	-0.45446	-0.183761	-0.19997	-0.167867	0.462188	-0.385635	0.467146	-0.00866327	-0.211836	0.20873	0.799409	-0.281734	-0.0790228	-0.0308421	-0.385862	-0.48365	-0.371054	0.0922656	0.187206	-0.182644	-0.133475	-0.205083	-0.334137	0.228007	-0.640758	0.876086	0.293789	-0.291879
-4.87515	-0.697516	0.249335	-0.686898	-0.333638	0.54746	0.520006	-0.0201038	-0.616913	0.35838	-0.0561116	-0.591649	-0.0223621	0.0237832	-0.242192	-0.120683	0.52279	0.318061	-0.185248	0.256653	-0.397519	-0.30319	-0.455695	-0.183388	-0.198057	-0.166777	0.462366	-0.384969	0.466707	-0.00931989	-0.212467	0.209805	0.799817	-0.279664	-0.0760684	-0.0313796	-0.386236	-0.481389	-0.369867	0.0929482	0.188036	-0.180258	-0.13545	-0.202501	-0.334452	0.228947	-0.640501	0.874986	0.292846	-0.291243
-4.87417	-0.698688	0.248135	-0.685306	-0.334708	0.548721	0.519275	-0.020509	-0.617082	0.35688	-0.0558055	-0.592967	-0.0225716	0.0237442	-0.24303	-0.122151	0.521505	0.317535	-0.18497	0.258792	-0.398064	-0.30218	-0.456938	-0.183011	-0.196135	-0.165685	0.462536	-0.384316	0.466274	-0.00996275	-0.213089	0.210868	0.800202	-0.277587	-0.0731154	-0.0319185	-0.386612	-0.479122	-0.368683	0.0936341	0.188864	-0.177878	-0.137428	-0.199914	-0.334774	0.22987	-0.640237	0.873861	0.291908	-0.29061
-4.87319	-0.699849	0.246954	-0.683699	-0.335781	0.549969	0.518532	-0.0209313	-0.617245	0.355372	-0.0555041	-0.594281	-0.0227781	0.0237	-0.243863	-0.123613	0.520207	0.31699	-0.184688	0.260943	-0.398609	-0.301176	-0.458186	-0.182632	-0.194206	-0.164591	0.462696	-0.383678	0.465849	-0.0105918	-0.213704	0.211921	0.800563	-0.275502	-0.0701639	-0.0324589	-0.38699	-0.47685	-0.367503	0.0943233	0.18969	-0.175506	-0.13941	-0.197323	-0.335101	0.230776	-0.639965	0.872713	0.290977	-0.28998
-4.8722	-0.700999	0.245794	-0.682075	-0.336859	0.551205	0.517776	-0.0213708	-0.617405	0.353854	-0.0552074	-0.595592	-0.0229815	0.0236505	-0.244692	-0.125069	0.518894	0.316427	-0.184403	0.263104	-0.399156	-0.300176	-0.459441	-0.182249	-0.19227	-0.163495	0.462848	-0.383054	0.46543	-0.011207	-0.214311	0.212962	0.8009	-0.27341	-0.0672139	-0.0330005	-0.387368	-0.474572	-0.366327	0.0950157	0.190515	-0.17314	-0.141396	-0.194728	-0.335435	0.231665	-0.639687	0.87154	0.290052	-0.289353
-4.87122	-0.702138	0.244654	-0.680435	-0.33794	0.552429	0.517007	-0.0218274	-0.617559	0.352327	-0.0549155	-0.596899	-0.0231818	0.0235959	-0.245516	-0.12652	0.517568	0.315845	-0.184113	0.265277	-0.399704	-0.299181	-0.460701	-0.181864	-0.190325	-0.162397	0.462991	-0.382443	0.465019	-0.0118084	-0.21491	0.213993	0.801213	-0.271311	-0.0642655	-0.0335434	-0.387748	-0.472289	-0.365155	0.0957114	0.191338	-0.170781	-0.143384	-0.192128	-0.335775	0.232536	-0.639401	0.870343	0.289133	-0.28873
-4.87024	-0.703265	0.243533	-0.678778	-0.339025	0.55364	0.516226	-0.0223012	-0.617709	0.35079	-0.0546283	-0.598203	-0.023379	0.0235363	-0.246336	-0.127964	0.516229	0.315244	-0.183819	0.267461	-0.400253	-0.298191	-0.461967	-0.181475	-0.188374	-0.161297	0.463125	-0.381847	0.464616	-0.0123959	-0.215501	0.215013	0.801503	-0.269204	-0.061319	-0.0340873	-0.388129	-0.470001	-0.363986	0.0964103	0.192158	-0.168429	-0.145375	-0.189524	-0.336121	0.233389	-0.639108	0.869122	0.28822	-0.28811
-4.86926	-0.704381	0.242433	-0.677106	-0.340114	0.554839	0.515433	-0.0227922	-0.617855	0.349245	-0.0543458	-0.599503	-0.0235728	0.0234716	-0.247151	-0.129403	0.514876	0.314624	-0.183521	0.269656	-0.400804	-0.297206	-0.463239	-0.181083	-0.186415	-0.160195	0.463251	-0.381265	0.46422	-0.0129694	-0.216084	0.216021	0.801769	-0.267089	-0.0583743	-0.0346321	-0.388511	-0.467708	-0.362823	0.0971123	0.192977	-0.166085	-0.147368	-0.186917	-0.336473	0.234225	-0.638808	0.867877	0.287313	-0.287494
-4.86827	-0.705485	0.241354	-0.675418	-0.341207	0.556024	0.514627	-0.0233003	-0.617995	0.347691	-0.0540681	-0.6008	-0.0237632	0.023402	-0.247961	-0.130835	0.513509	0.313986	-0.183219	0.271862	-0.401356	-0.296227	-0.464516	-0.180688	-0.184449	-0.159091	0.463368	-0.380696	0.463831	-0.0135289	-0.216659	0.217019	0.802011	-0.264967	-0.0554316	-0.0351778	-0.388894	-0.465411	-0.361663	0.0978174	0.193793	-0.163749	-0.149365	-0.184305	-0.336832	0.235043	-0.6385	0.866608	0.286413	-0.286881
-4.86729	-0.706578	0.240294	-0.673714	-0.342303	0.557198	0.513809	-0.0238257	-0.618132	0.346128	-0.0537952	-0.602092	-0.0239502	0.0233275	-0.248767	-0.132262	0.51213	0.31333	-0.182913	0.274078	-0.401908	-0.295252	-0.465797	-0.180289	-0.182476	-0.157984	0.463476	-0.380142	0.463451	-0.0140744	-0.217226	0.218005	0.80223	-0.262837	-0.052491	-0.0357241	-0.389277	-0.463109	-0.360509	0.0985256	0.194606	-0.16142	-0.151364	-0.18169	-0.337197	0.235843	-0.638186	0.865316	0.285518	-0.286272
-4.86631	-0.707659	0.239255	-0.671994	-0.343403	0.558358	0.51298	-0.0243681	-0.618263	0.344556	-0.0535269	-0.60338	-0.0241337	0.0232483	-0.249568	-0.133682	0.510738	0.312655	-0.182604	0.276306	-0.402462	-0.294283	-0.467084	-0.179888	-0.180495	-0.156876	0.463576	-0.379602	0.463078	-0.0146059	-0.217786	0.21898	0.802426	-0.260699	-0.0495526	-0.0362711	-0.389661	-0.460803	-0.359359	0.0992368	0.195417	-0.159099	-0.153365	-0.179071	-0.337568	0.236624	-0.637864	0.864	0.28463	-0.285666
-4.86532	-0.708729	0.238236	-0.670258	-0.344506	0.559506	0.512138	-0.0249278	-0.61839	0.342975	-0.0532634	-0.604665	-0.0243136	0.0231643	-0.250364	-0.135095	0.509333	0.311962	-0.182291	0.278544	-0.403018	-0.293319	-0.468376	-0.179483	-0.178508	-0.155765	0.463667	-0.379075	0.462713	-0.0151232	-0.218337	0.219944	0.802598	-0.258554	-0.0466165	-0.0368186	-0.390045	-0.458493	-0.358214	0.099951	0.196225	-0.156787	-0.155368	-0.176449	-0.337946	0.237388	-0.637534	0.862661	0.283748	-0.285064
-4.86434	-0.709786	0.237238	-0.668507	-0.345612	0.560641	0.511284	-0.0255045	-0.618512	0.341386	-0.0530045	-0.605945	-0.0244898	0.0230757	-0.251155	-0.136502	0.507916	0.31125	-0.181974	0.280793	-0.403574	-0.292361	-0.469672	-0.179075	-0.176514	-0.154652	0.46375	-0.378563	0.462357	-0.0156265	-0.21888	0.220897	0.802747	-0.256401	-0.0436829	-0.0373663	-0.39043	-0.456179	-0.357075	0.100668	0.19703	-0.154482	-0.157373	-0.173823	-0.33833	0.238133	-0.637198	0.861299	0.282873	-0.284466
-4.86336	-0.710832	0.236261	-0.66674	-0.346722	0.561763	0.510418	-0.0260984	-0.61863	0.339789	-0.0527504	-0.607221	-0.0246623	0.0229825	-0.251941	-0.137903	0.506486	0.310521	-0.181653	0.283052	-0.404131	-0.291408	-0.470973	-0.178663	-0.174513	-0.153536	0.463824	-0.378065	0.462008	-0.0161156	-0.219416	0.221839	0.802873	-0.254239	-0.0407518	-0.0379144	-0.390815	-0.453862	-0.355941	0.101388	0.197831	-0.152186	-0.15938	-0.171195	-0.33872	0.23886	-0.636854	0.859913	0.282003	-0.283872
-4.86237	-0.711866	0.235303	-0.664958	-0.347836	0.562872	0.509541	-0.0267094	-0.618743	0.338183	-0.0525009	-0.608492	-0.0248309	0.0228847	-0.252722	-0.139296	0.505044	0.309773	-0.181329	0.285321	-0.40469	-0.290461	-0.472278	-0.178249	-0.172506	-0.152418	0.463889	-0.377581	0.461668	-0.0165905	-0.219943	0.22277	0.802975	-0.25207	-0.0378233	-0.0384625	-0.391201	-0.451542	-0.354812	0.102111	0.198629	-0.149899	-0.161388	-0.168563	-0.339117	0.239568	-0.636502	0.858505	0.28114	-0.283281
-4.86139	-0.712888	0.234367	-0.66316	-0.348952	0.563968	0.508652	-0.0273375	-0.618851	0.336568	-0.0522561	-0.609759	-0.0249956	0.0227825	-0.253498	-0.140683	0.50359	0.309007	-0.181001	0.287601	-0.40525	-0.28952	-0.473586	-0.177831	-0.170492	-0.151298	0.463946	-0.377111	0.461337	-0.0170511	-0.220463	0.223689	0.803055	-0.249893	-0.0348976	-0.0390106	-0.391586	-0.449219	-0.353689	0.102837	0.199424	-0.14762	-0.163399	-0.165929	-0.33952	0.240258	-0.636143	0.857073	0.280284	-0.282695
-4.86041	-0.713898	0.233451	-0.661347	-0.350072	0.565051	0.507752	-0.0279826	-0.618955	0.334946	-0.052016	-0.611021	-0.0251564	0.022676	-0.254269	-0.142063	0.502124	0.308224	-0.18067	0.289892	-0.405811	-0.288585	-0.474899	-0.177409	-0.168472	-0.150176	0.463995	-0.376655	0.461014	-0.0174975	-0.220974	0.224598	0.803112	-0.247708	-0.0319747	-0.0395586	-0.391971	-0.446893	-0.352572	0.103565	0.200215	-0.145351	-0.16541	-0.163292	-0.33993	0.240929	-0.635776	0.855619	0.279433	-0.282112
-4.85943	-0.714895	0.232556	-0.659519	-0.351195	0.566121	0.50684	-0.0286447	-0.619054	0.333315	-0.0517804	-0.612279	-0.0253131	0.0225652	-0.255035	-0.143436	0.500647	0.307422	-0.180336	0.292192	-0.406373	-0.287655	-0.476215	-0.176985	-0.166445	-0.149051	0.464036	-0.376213	0.4607	-0.0179296	-0.221478	0.225495	0.803146	-0.245515	-0.0290547	-0.0401064	-0.392356	-0.444564	-0.351461	0.104297	0.201002	-0.14309	-0.167423	-0.160652	-0.340346	0.241581	-0.635402	0.854142	0.278589	-0.281534
-4.85844	-0.715881	0.231681	-0.657676	-0.352321	0.567178	0.505917	-0.0293239	-0.619148	0.331676	-0.0515495	-0.613532	-0.0254657	0.0224501	-0.255796	-0.144801	0.499158	0.306603	-0.179998	0.294502	-0.406936	-0.286732	-0.477534	-0.176557	-0.164412	-0.147924	0.464068	-0.375785	0.460394	-0.0183474	-0.221974	0.226381	0.803157	-0.243314	-0.0261379	-0.0406538	-0.39274	-0.442233	-0.350357	0.105031	0.201784	-0.140839	-0.169436	-0.15801	-0.340768	0.242214	-0.63502	0.852642	0.277752	-0.280959
-4.85746	-0.716854	0.230828	-0.655818	-0.35345	0.568222	0.504982	-0.03002	-0.619238	0.33003	-0.0513232	-0.61478	-0.0256142	0.0223309	-0.256551	-0.14616	0.497657	0.305766	-0.179657	0.296822	-0.4075	-0.285814	-0.478857	-0.176125	-0.162373	-0.146794	0.464092	-0.375371	0.460097	-0.0187508	-0.222462	0.227256	0.803146	-0.241104	-0.0232241	-0.0412006	-0.393124	-0.439899	-0.349258	0.105767	0.202563	-0.138597	-0.171451	-0.155366	-0.341197	0.242828	-0.634631	0.85112	0.27692	-0.280389
-4.85648	-0.717815	0.229995	-0.653945	-0.354581	0.569252	0.504036	-0.030733	-0.619322	0.328375	-0.0511014	-0.616024	-0.0257584	0.0222076	-0.257302	-0.147511	0.496146	0.304912	-0.179312	0.299152	-0.408066	-0.284903	-0.480183	-0.17569	-0.160328	-0.145662	0.464107	-0.374972	0.459809	-0.0191398	-0.222941	0.228119	0.803112	-0.238887	-0.0203136	-0.0417469	-0.393507	-0.437564	-0.348167	0.106507	0.203337	-0.136365	-0.173466	-0.15272	-0.341633	0.243423	-0.634234	0.849576	0.276095	-0.279823
-4.85549	-0.718764	0.229183	-0.652057	-0.355716	0.57027	0.503079	-0.0314628	-0.619403	0.326713	-0.0508841	-0.617262	-0.0258982	0.0220803	-0.258047	-0.148854	0.494623	0.30404	-0.178965	0.301492	-0.408632	-0.283998	-0.481511	-0.175252	-0.158277	-0.144528	0.464115	-0.374586	0.45953	-0.0195144	-0.223413	0.228972	0.803055	-0.236661	-0.0174065	-0.0422925	-0.39389	-0.435227	-0.347081	0.107249	0.204107	-0.134143	-0.175482	-0.150072	-0.342075	0.243999	-0.633829	0.84801	0.275277	-0.279261
-4.85451	-0.7197	0.228392	-0.650154	-0.356854	0.571274	0.502111	-0.0322095	-0.619478	0.325043	-0.0506714	-0.618495	-0.0260337	0.0219491	-0.258787	-0.15019	0.49309	0.30315	-0.178614	0.303842	-0.4092	-0.2831	-0.482842	-0.17481	-0.15622	-0.143391	0.464114	-0.374214	0.45926	-0.0198745	-0.223877	0.229813	0.802977	-0.234427	-0.0145029	-0.0428372	-0.394272	-0.432889	-0.346003	0.107993	0.204872	-0.13193	-0.177499	-0.147422	-0.342523	0.244555	-0.633417	0.846421	0.274464	-0.278703
-4.85353	-0.720624	0.227622	-0.648237	-0.357994	0.572264	0.501133	-0.0329729	-0.619549	0.323365	-0.0504631	-0.619723	-0.0261647	0.0218141	-0.259521	-0.151518	0.491547	0.302243	-0.17826	0.3062	-0.409768	-0.282208	-0.484176	-0.174365	-0.154157	-0.142251	0.464105	-0.373856	0.459	-0.0202201	-0.224333	0.230643	0.802876	-0.232185	-0.0116028	-0.0433809	-0.394653	-0.430549	-0.344932	0.10874	0.205632	-0.129728	-0.179515	-0.144771	-0.342978	0.245093	-0.632997	0.844811	0.273659	-0.27815
-4.85254	-0.721535	0.226872	-0.646306	-0.359137	0.573242	0.500143	-0.0337531	-0.619615	0.32168	-0.0502593	-0.620945	-0.0262911	0.0216753	-0.260251	-0.152838	0.489992	0.301319	-0.177903	0.308569	-0.410338	-0.281322	-0.485511	-0.173917	-0.152089	-0.141109	0.464089	-0.373513	0.458748	-0.0205512	-0.224782	0.231461	0.802753	-0.229935	-0.00870631	-0.0439235	-0.395033	-0.428209	-0.343868	0.10949	0.206387	-0.127536	-0.181532	-0.142118	-0.34344	0.24561	-0.632569	0.843179	0.272859	-0.277601
-4.85156	-0.722434	0.226144	-0.64436	-0.360283	0.574206	0.499143	-0.0345499	-0.619677	0.319987	-0.0500599	-0.622162	-0.026413	0.0215329	-0.260975	-0.154151	0.488428	0.300378	-0.177543	0.310946	-0.410909	-0.280443	-0.486849	-0.173465	-0.150015	-0.139965	0.464064	-0.373183	0.458506	-0.0208677	-0.225222	0.232269	0.802608	-0.227676	-0.00581362	-0.0444649	-0.395411	-0.425868	-0.342811	0.110241	0.207137	-0.125355	-0.183549	-0.139464	-0.343908	0.246108	-0.632133	0.841525	0.272066	-0.277056
-4.85058	-0.72332	0.225437	-0.6424	-0.361431	0.575156	0.498132	-0.0353633	-0.619734	0.318287	-0.0498648	-0.623374	-0.0265302	0.0213868	-0.261693	-0.155455	0.486853	0.29942	-0.17718	0.313333	-0.411481	-0.279571	-0.488188	-0.173009	-0.147936	-0.138817	0.464031	-0.372867	0.458273	-0.0211696	-0.225654	0.233065	0.802442	-0.225409	-0.00292478	-0.045005	-0.395789	-0.423526	-0.341762	0.110996	0.207881	-0.123184	-0.185565	-0.136809	-0.344382	0.246587	-0.63169	0.83985	0.271279	-0.276516
-4.84959	-0.724193	0.224751	-0.640425	-0.362582	0.576093	0.49711	-0.0361932	-0.619786	0.31658	-0.0496741	-0.62458	-0.0266427	0.0212372	-0.262406	-0.156751	0.485269	0.298445	-0.176814	0.315728	-0.412054	-0.278705	-0.489529	-0.17255	-0.145852	-0.137668	0.463991	-0.372565	0.45805	-0.0214569	-0.226079	0.23385	0.802254	-0.223133	-3.98866e-05	-0.0455436	-0.396164	-0.421183	-0.34072	0.111752	0.20862	-0.121023	-0.187581	-0.134153	-0.344864	0.247046	-0.631239	0.838154	0.270499	-0.27598
-4.84861	-0.725054	0.224085	-0.638437	-0.363735	0.577016	0.496078	-0.0370395	-0.619833	0.314865	-0.0494877	-0.625781	-0.0267504	0.0210841	-0.263114	-0.158039	0.483675	0.297454	-0.176446	0.318133	-0.412628	-0.277847	-0.490871	-0.172087	-0.143762	-0.136515	0.463943	-0.372277	0.457836	-0.0217295	-0.226496	0.234624	0.802044	-0.22085	0.00284096	-0.0460807	-0.396539	-0.418841	-0.339686	0.112511	0.209354	-0.118874	-0.189597	-0.131496	-0.345351	0.247485	-0.63078	0.836436	0.269725	-0.275449
-4.84763	-0.725902	0.223441	-0.636435	-0.364891	0.577926	0.495036	-0.0379023	-0.619876	0.313144	-0.0493056	-0.626975	-0.0268533	0.0209277	-0.263816	-0.159318	0.482072	0.296445	-0.176074	0.320546	-0.413204	-0.276995	-0.492215	-0.171621	-0.141668	-0.13536	0.463887	-0.372003	0.457632	-0.0219875	-0.226904	0.235386	0.801813	-0.218557	0.00571766	-0.046616	-0.396911	-0.416499	-0.338661	0.113272	0.210081	-0.116736	-0.191612	-0.128838	-0.345846	0.247904	-0.630313	0.834698	0.268957	-0.274923
-4.84665	-0.726738	0.222818	-0.634419	-0.366049	0.578822	0.493983	-0.0387814	-0.619914	0.311415	-0.0491276	-0.628164	-0.0269512	0.020768	-0.264513	-0.160589	0.480459	0.29542	-0.1757	0.322968	-0.41378	-0.27615	-0.493559	-0.171151	-0.139568	-0.134202	0.463823	-0.371743	0.457437	-0.0222307	-0.227305	0.236137	0.80156	-0.216257	0.00859012	-0.0471496	-0.397282	-0.414157	-0.337643	0.114035	0.210802	-0.114609	-0.193627	-0.12618	-0.346347	0.248303	-0.629838	0.832938	0.268196	-0.274401
-4.84566	-0.72756	0.222216	-0.63239	-0.367209	0.579705	0.49292	-0.0396766	-0.619947	0.30968	-0.0489539	-0.629347	-0.0270442	0.0206052	-0.265204	-0.161852	0.478837	0.294379	-0.175323	0.325399	-0.414357	-0.275313	-0.494904	-0.170678	-0.137463	-0.133042	0.463752	-0.371496	0.457252	-0.0224591	-0.227698	0.236877	0.801287	-0.213948	0.0114582	-0.0476811	-0.397651	-0.411816	-0.336633	0.114801	0.211518	-0.112493	-0.19564	-0.123522	-0.346855	0.248683	-0.629355	0.831158	0.267441	-0.273884
-4.84468	-0.72837	0.221636	-0.630346	-0.368372	0.580573	0.491847	-0.0405881	-0.619976	0.307937	-0.0487842	-0.630524	-0.0271321	0.0204391	-0.26589	-0.163105	0.477206	0.293321	-0.174944	0.327838	-0.414936	-0.274483	-0.496249	-0.170201	-0.135354	-0.131879	0.463673	-0.371263	0.457077	-0.0226728	-0.228084	0.237606	0.800992	-0.211631	0.0143219	-0.0482107	-0.398018	-0.409475	-0.335632	0.115568	0.212227	-0.110389	-0.197652	-0.120863	-0.347369	0.249042	-0.628865	0.829357	0.266693	-0.273372
-4.8437	-0.729167	0.221076	-0.62829	-0.369537	0.581428	0.490764	-0.0415156	-0.619999	0.306188	-0.0486186	-0.631694	-0.0272149	0.0202701	-0.26657	-0.16435	0.475566	0.292247	-0.174562	0.330285	-0.415516	-0.273659	-0.497595	-0.169721	-0.13324	-0.130713	0.463586	-0.371044	0.456911	-0.0228716	-0.228461	0.238324	0.800677	-0.209305	0.0171811	-0.048738	-0.398382	-0.407136	-0.33464	0.116338	0.212929	-0.108296	-0.199663	-0.118205	-0.34789	0.249381	-0.628366	0.827536	0.265951	-0.272864
-4.84271	-0.729951	0.220538	-0.62622	-0.370704	0.58227	0.489671	-0.0424591	-0.620018	0.304433	-0.048457	-0.632859	-0.0272925	0.0200981	-0.267245	-0.165586	0.473918	0.291157	-0.174177	0.332741	-0.416096	-0.272844	-0.498941	-0.169237	-0.131122	-0.129544	0.463492	-0.370839	0.456756	-0.0230556	-0.228831	0.23903	0.800341	-0.20697	0.0200357	-0.0492631	-0.398745	-0.404798	-0.333656	0.11711	0.213625	-0.106216	-0.201673	-0.115546	-0.348418	0.249701	-0.62786	0.825695	0.265215	-0.272361
-4.84173	-0.730722	0.22002	-0.624137	-0.371873	0.583097	0.488568	-0.0434184	-0.620033	0.30267	-0.0482994	-0.634017	-0.027365	0.0199232	-0.267914	-0.166813	0.472261	0.290051	-0.17379	0.335204	-0.416678	-0.272036	-0.500287	-0.168749	-0.128999	-0.128372	0.463391	-0.370647	0.45661	-0.0232247	-0.229192	0.239725	0.799984	-0.204628	0.0228856	-0.0497857	-0.399105	-0.402461	-0.332681	0.117883	0.214314	-0.104147	-0.203681	-0.112888	-0.348952	0.25	-0.627345	0.823833	0.264486	-0.271864
-4.84075	-0.73148	0.219524	-0.622041	-0.373045	0.58391	0.487456	-0.0443935	-0.620042	0.300901	-0.0481458	-0.635169	-0.0274321	0.0197456	-0.268577	-0.168031	0.470597	0.288929	-0.173401	0.337675	-0.417261	-0.271235	-0.501632	-0.168258	-0.126872	-0.127198	0.463283	-0.370469	0.456474	-0.0233789	-0.229547	0.240409	0.799608	-0.202277	0.0257306	-0.0503058	-0.399462	-0.400126	-0.331714	0.118659	0.214996	-0.10209	-0.205688	-0.110231	-0.349493	0.250279	-0.626823	0.821952	0.263763	-0.271371
-4.83976	-0.732225	0.219049	-0.619932	-0.374218	0.58471	0.486334	-0.0453844	-0.620047	0.299126	-0.0479959	-0.636314	-0.0274939	0.0195652	-0.269235	-0.169239	0.468924	0.287791	-0.173009	0.340154	-0.417845	-0.270442	-0.502977	-0.167763	-0.124741	-0.126021	0.463167	-0.370304	0.456348	-0.0235182	-0.229893	0.241082	0.799211	-0.199917	0.0285708	-0.0508232	-0.399817	-0.397793	-0.330757	0.119436	0.215671	-0.100046	-0.207692	-0.107574	-0.350041	0.250537	-0.626293	0.82005	0.263046	-0.270883
-4.83878	-0.732958	0.218596	-0.61781	-0.375393	0.585496	0.485202	-0.0463908	-0.620047	0.297345	-0.0478499	-0.637453	-0.0275503	0.0193822	-0.269886	-0.170439	0.467243	0.286638	-0.172614	0.342641	-0.41843	-0.269656	-0.504321	-0.167264	-0.122606	-0.124841	0.463044	-0.370153	0.456232	-0.0236425	-0.230231	0.241743	0.798794	-0.197549	0.031406	-0.0513379	-0.400169	-0.395463	-0.32981	0.120216	0.216338	-0.0980142	-0.209695	-0.104918	-0.350595	0.250775	-0.625754	0.818129	0.262336	-0.2704
-4.8378	-0.733677	0.218163	-0.615675	-0.376571	0.586267	0.484061	-0.0474126	-0.620043	0.295557	-0.0477076	-0.638585	-0.0276012	0.0191967	-0.270533	-0.171628	0.465555	0.285469	-0.172218	0.345135	-0.419016	-0.268878	-0.505664	-0.166762	-0.120467	-0.123658	0.462913	-0.370015	0.456127	-0.0237517	-0.230562	0.242394	0.798357	-0.195172	0.0342362	-0.0518497	-0.400518	-0.393134	-0.328871	0.120997	0.216998	-0.0959949	-0.211696	-0.102262	-0.351156	0.250993	-0.625208	0.816189	0.261632	-0.269922
-4.83682	-0.734383	0.217752	-0.613528	-0.37775	0.587025	0.48291	-0.0484499	-0.620033	0.293763	-0.047569	-0.63971	-0.0276467	0.0190087	-0.271173	-0.172808	0.463859	0.284285	-0.171819	0.347636	-0.419603	-0.268109	-0.507005	-0.166256	-0.118324	-0.122473	0.462776	-0.369891	0.456031	-0.023846	-0.230885	0.243033	0.797901	-0.192787	0.0370612	-0.0523584	-0.400864	-0.390809	-0.327942	0.12178	0.217651	-0.0939883	-0.213694	-0.0996085	-0.351724	0.251191	-0.624654	0.814229	0.260934	-0.269449
-4.83583	-0.735076	0.217362	-0.611369	-0.378931	0.587769	0.481751	-0.0495024	-0.620019	0.291963	-0.047434	-0.640829	-0.0276866	0.0188183	-0.271808	-0.173979	0.462156	0.283086	-0.171417	0.350145	-0.420191	-0.267347	-0.508346	-0.165746	-0.116177	-0.121284	0.462632	-0.36978	0.455945	-0.0239252	-0.231201	0.243661	0.797425	-0.190394	0.039881	-0.052864	-0.401207	-0.388486	-0.327023	0.122564	0.218296	-0.0919946	-0.21569	-0.0969558	-0.352299	0.251368	-0.624091	0.812251	0.260243	-0.268981
-4.83485	-0.735756	0.216993	-0.609197	-0.380113	0.588498	0.480582	-0.05057	-0.62	0.290157	-0.0473025	-0.64194	-0.0277208	0.0186257	-0.272438	-0.175139	0.460446	0.281871	-0.171014	0.352661	-0.42078	-0.266593	-0.509684	-0.165233	-0.114027	-0.120092	0.462481	-0.369683	0.45587	-0.0239893	-0.231508	0.244278	0.79693	-0.187992	0.0426954	-0.0533664	-0.401546	-0.386166	-0.326113	0.12335	0.218933	-0.0900139	-0.217683	-0.0943045	-0.35288	0.251525	-0.623521	0.810253	0.259557	-0.268519
-4.83387	-0.736424	0.216645	-0.607014	-0.381298	0.589213	0.479404	-0.0516527	-0.619977	0.288345	-0.0471745	-0.643045	-0.0277494	0.0184308	-0.273061	-0.17629	0.458729	0.280642	-0.170609	0.355183	-0.421371	-0.265847	-0.511021	-0.164716	-0.111873	-0.118898	0.462323	-0.369598	0.455804	-0.0240383	-0.231808	0.244884	0.796415	-0.185582	0.0455044	-0.0538654	-0.401883	-0.38385	-0.325214	0.124138	0.219562	-0.0880463	-0.219674	-0.0916549	-0.353468	0.251662	-0.622942	0.808236	0.258878	-0.268061
-4.83288	-0.737077	0.216319	-0.604818	-0.382484	0.589915	0.478216	-0.0527503	-0.619948	0.286528	-0.0470499	-0.644142	-0.0277722	0.0182338	-0.273679	-0.177431	0.457006	0.279398	-0.170201	0.357713	-0.421962	-0.265109	-0.512355	-0.164195	-0.109716	-0.117701	0.462158	-0.369527	0.455749	-0.0240721	-0.232101	0.245478	0.795882	-0.183163	0.0483079	-0.0543609	-0.402215	-0.381537	-0.324324	0.124928	0.220182	-0.086092	-0.221661	-0.0890071	-0.354062	0.251778	-0.622356	0.806201	0.258206	-0.267609
-4.8319	-0.737718	0.216013	-0.60261	-0.383672	0.590602	0.477021	-0.0538626	-0.619915	0.284704	-0.0469287	-0.645233	-0.0277893	0.0180348	-0.274291	-0.178561	0.455276	0.278139	-0.169791	0.360248	-0.422554	-0.26438	-0.513687	-0.163671	-0.107555	-0.1165	0.461987	-0.369469	0.455704	-0.0240908	-0.232385	0.246062	0.79533	-0.180736	0.0511059	-0.0548528	-0.402545	-0.379228	-0.323445	0.125719	0.220795	-0.0841512	-0.223646	-0.0863613	-0.354664	0.251873	-0.621761	0.804147	0.257539	-0.267162
-4.83092	-0.738346	0.215729	-0.600391	-0.384862	0.591275	0.475816	-0.0549896	-0.619877	0.282875	-0.0468107	-0.646316	-0.0278006	0.0178339	-0.274897	-0.179681	0.45354	0.276866	-0.16938	0.362791	-0.423148	-0.263658	-0.515017	-0.163142	-0.105392	-0.115297	0.461808	-0.369424	0.455669	-0.0240942	-0.232662	0.246634	0.79476	-0.1783	0.0538981	-0.0553411	-0.40287	-0.376924	-0.322576	0.126511	0.221399	-0.0822238	-0.225628	-0.0837176	-0.355272	0.251948	-0.621159	0.802076	0.256879	-0.266721
-4.82993	-0.738961	0.215466	-0.59816	-0.386053	0.591933	0.474602	-0.0561311	-0.619834	0.281041	-0.0466959	-0.647391	-0.0278059	0.0176311	-0.275498	-0.180791	0.451797	0.275579	-0.168966	0.365339	-0.423743	-0.262945	-0.516344	-0.162611	-0.103226	-0.11409	0.461624	-0.369392	0.455644	-0.0240824	-0.232932	0.247195	0.794171	-0.175856	0.0566847	-0.0558254	-0.403192	-0.374623	-0.321717	0.127305	0.221994	-0.0803102	-0.227606	-0.0810762	-0.355887	0.252002	-0.620548	0.799986	0.256225	-0.266285
-4.82895	-0.739563	0.215225	-0.595918	-0.387245	0.592577	0.47338	-0.057287	-0.619787	0.279201	-0.0465842	-0.64846	-0.0278054	0.0174265	-0.276092	-0.181891	0.450049	0.274277	-0.16855	0.367894	-0.424338	-0.262241	-0.517668	-0.162075	-0.101056	-0.112881	0.461433	-0.369373	0.45563	-0.0240554	-0.233194	0.247746	0.793564	-0.173404	0.0594654	-0.0563059	-0.40351	-0.372327	-0.320869	0.1281	0.222581	-0.0784104	-0.229581	-0.0784373	-0.356509	0.252036	-0.619929	0.797878	0.255577	-0.265854
-4.82797	-0.740151	0.215004	-0.593664	-0.388439	0.593207	0.472149	-0.0584572	-0.619735	0.277355	-0.0464755	-0.649521	-0.0277988	0.0172202	-0.276681	-0.18298	0.448295	0.272961	-0.168133	0.370455	-0.424935	-0.261545	-0.518988	-0.161536	-0.0988844	-0.111668	0.461235	-0.369367	0.455625	-0.0240131	-0.233448	0.248285	0.792939	-0.170943	0.0622401	-0.0567823	-0.403823	-0.370036	-0.320032	0.128896	0.223158	-0.0765246	-0.231553	-0.0758009	-0.357137	0.25205	-0.619302	0.795752	0.254935	-0.265429
-4.82698	-0.740726	0.214805	-0.5914	-0.389635	0.593823	0.47091	-0.0596414	-0.619678	0.275505	-0.0463698	-0.650574	-0.0277863	0.0170123	-0.277264	-0.184058	0.446536	0.271632	-0.167714	0.373021	-0.425533	-0.260858	-0.520305	-0.160993	-0.0967098	-0.110452	0.461031	-0.369374	0.455631	-0.0239555	-0.233695	0.248813	0.792297	-0.168474	0.0650089	-0.0572545	-0.404133	-0.367749	-0.319205	0.129694	0.223727	-0.0746528	-0.23352	-0.0731674	-0.357772	0.252042	-0.618667	0.793609	0.2543	-0.265009
-4.826	-0.741289	0.214627	-0.589124	-0.390832	0.594424	0.469662	-0.0608396	-0.619616	0.273649	-0.0462669	-0.651619	-0.0277676	0.0168029	-0.277842	-0.185126	0.444771	0.270288	-0.167292	0.375593	-0.426132	-0.26018	-0.521619	-0.160446	-0.0945328	-0.109234	0.460821	-0.369393	0.455647	-0.0238825	-0.233934	0.24933	0.791637	-0.165997	0.0677716	-0.0577224	-0.404438	-0.365468	-0.318389	0.130493	0.224287	-0.0727953	-0.235484	-0.0705369	-0.358414	0.252015	-0.618024	0.791448	0.25367	-0.264595
-4.82502	-0.741838	0.21447	-0.586838	-0.39203	0.595011	0.468407	-0.0620516	-0.61955	0.271788	-0.0461668	-0.652657	-0.0277429	0.016592	-0.278414	-0.186182	0.443001	0.268931	-0.16687	0.378171	-0.426732	-0.25951	-0.522928	-0.159895	-0.0923534	-0.108012	0.460605	-0.369425	0.455674	-0.0237941	-0.234166	0.249837	0.790959	-0.163511	0.0705282	-0.0581859	-0.404738	-0.363192	-0.317584	0.131293	0.224837	-0.0709521	-0.237444	-0.0679095	-0.359063	0.251966	-0.617373	0.78927	0.253047	-0.264186
-4.82404	-0.742374	0.214334	-0.58454	-0.39323	0.595583	0.467143	-0.0632773	-0.619478	0.269922	-0.0460694	-0.653687	-0.027712	0.0163798	-0.278979	-0.187228	0.441226	0.267561	-0.166445	0.380754	-0.427333	-0.258849	-0.524233	-0.159341	-0.0901719	-0.106787	0.460383	-0.369469	0.45571	-0.0236904	-0.23439	0.250332	0.790265	-0.161017	0.0732785	-0.058645	-0.405035	-0.360922	-0.316791	0.132094	0.225377	-0.0691235	-0.2394	-0.0652854	-0.359718	0.251898	-0.616714	0.787075	0.252429	-0.263783
-4.82305	-0.742897	0.214219	-0.582233	-0.394431	0.596141	0.46587	-0.0645165	-0.619402	0.268051	-0.0459746	-0.654709	-0.0276748	0.0161663	-0.27954	-0.188263	0.439446	0.266178	-0.166018	0.383342	-0.427935	-0.258197	-0.525534	-0.158783	-0.0879882	-0.105559	0.460154	-0.369526	0.455757	-0.0235712	-0.234607	0.250816	0.789553	-0.158515	0.0760225	-0.0590994	-0.405326	-0.358658	-0.316008	0.132897	0.225908	-0.0673094	-0.241351	-0.0626647	-0.36038	0.251808	-0.616047	0.784864	0.251818	-0.263385
-4.82207	-0.743407	0.214125	-0.579915	-0.395633	0.596685	0.46459	-0.065769	-0.619322	0.266175	-0.0458824	-0.655724	-0.0276314	0.0159517	-0.280094	-0.189286	0.437662	0.264781	-0.16559	0.385935	-0.428538	-0.257554	-0.526831	-0.158221	-0.0858025	-0.104328	0.45992	-0.369596	0.455814	-0.0234366	-0.234817	0.25129	0.788825	-0.156005	0.0787601	-0.059549	-0.405613	-0.3564	-0.315237	0.1337	0.226429	-0.06551	-0.243298	-0.0600477	-0.361049	0.251698	-0.615371	0.782635	0.251212	-0.262993
-4.82109	-0.743904	0.214052	-0.577587	-0.396836	0.597214	0.463302	-0.0670348	-0.619236	0.264294	-0.0457925	-0.65673	-0.0275818	0.0157359	-0.280643	-0.190298	0.435874	0.263371	-0.165161	0.388533	-0.429143	-0.25692	-0.528122	-0.157655	-0.083615	-0.103093	0.45968	-0.369677	0.455881	-0.0232866	-0.235019	0.251752	0.788081	-0.153487	0.0814913	-0.0599939	-0.405895	-0.354148	-0.314477	0.134504	0.226941	-0.0637255	-0.245241	-0.0574345	-0.361725	0.251568	-0.614688	0.780391	0.250613	-0.262607
-4.8201	-0.744388	0.214	-0.575248	-0.39804	0.597728	0.462006	-0.0683136	-0.619146	0.262409	-0.0457049	-0.657728	-0.0275257	0.0155191	-0.281185	-0.191299	0.434081	0.261949	-0.164729	0.391136	-0.429748	-0.256295	-0.529409	-0.157085	-0.0814258	-0.101855	0.459434	-0.369771	0.455958	-0.023121	-0.235213	0.252204	0.78732	-0.15096	0.0842159	-0.0604337	-0.406172	-0.351903	-0.313729	0.135309	0.227442	-0.061956	-0.247179	-0.0548253	-0.362407	0.251417	-0.613996	0.778129	0.250019	-0.262227
-4.81912	-0.744858	0.21397	-0.5729	-0.399246	0.598228	0.460703	-0.0696052	-0.619051	0.260519	-0.0456196	-0.658717	-0.0274633	0.0153014	-0.281722	-0.192288	0.432284	0.260514	-0.164297	0.393743	-0.430354	-0.255679	-0.53069	-0.156512	-0.0792351	-0.100615	0.459183	-0.369878	0.456046	-0.0229399	-0.235401	0.252644	0.786543	-0.148426	0.0869339	-0.0608686	-0.406443	-0.349664	-0.312992	0.136115	0.227933	-0.0602015	-0.249112	-0.0522202	-0.363096	0.251246	-0.613297	0.775852	0.249431	-0.261852
-4.81814	-0.745316	0.21396	-0.570542	-0.400453	0.598713	0.459391	-0.0709096	-0.618951	0.258624	-0.0455364	-0.659699	-0.0273945	0.0150828	-0.282254	-0.193266	0.430484	0.259067	-0.163862	0.396354	-0.430962	-0.255072	-0.531966	-0.155935	-0.0770429	-0.0993706	0.458926	-0.369996	0.456143	-0.0227433	-0.235581	0.253074	0.785751	-0.145883	0.0896452	-0.0612982	-0.40671	-0.347433	-0.312268	0.136922	0.228414	-0.0584623	-0.25104	-0.0496194	-0.363792	0.251054	-0.612589	0.773559	0.24885	-0.261483
-4.81715	-0.745761	0.213971	-0.568175	-0.40166	0.599184	0.458072	-0.0722265	-0.618847	0.256725	-0.0454552	-0.660672	-0.0273192	0.0148635	-0.282779	-0.194232	0.42868	0.257607	-0.163426	0.39897	-0.431571	-0.254475	-0.533236	-0.155354	-0.0748493	-0.0981234	0.458663	-0.370126	0.456251	-0.0225311	-0.235754	0.253493	0.784943	-0.143333	0.0923497	-0.0617226	-0.406971	-0.345208	-0.311555	0.13773	0.228885	-0.0567384	-0.252963	-0.047023	-0.364494	0.250842	-0.611873	0.77125	0.248274	-0.26112
-4.81617	-0.746192	0.214003	-0.565798	-0.402869	0.599639	0.456746	-0.0735557	-0.618738	0.254822	-0.045376	-0.661637	-0.0272374	0.0146435	-0.283299	-0.195186	0.426872	0.256135	-0.162989	0.401589	-0.43218	-0.253887	-0.534501	-0.15477	-0.0726546	-0.0968728	0.458395	-0.370268	0.456368	-0.0223033	-0.235919	0.253902	0.784119	-0.140774	0.0950474	-0.0621416	-0.407227	-0.342992	-0.310854	0.138538	0.229345	-0.05503	-0.254881	-0.0444314	-0.365203	0.25061	-0.61115	0.768926	0.247704	-0.260763
-4.81519	-0.746611	0.214056	-0.563412	-0.404079	0.600081	0.455412	-0.0748972	-0.618624	0.252914	-0.0452985	-0.662593	-0.0271491	0.0144229	-0.283813	-0.196129	0.425062	0.254652	-0.16255	0.404213	-0.432791	-0.253309	-0.535759	-0.154182	-0.0704589	-0.0956191	0.458122	-0.370422	0.456496	-0.0220599	-0.236077	0.254299	0.783281	-0.138208	0.0977382	-0.0625551	-0.407477	-0.340782	-0.310165	0.139347	0.229794	-0.0533371	-0.256794	-0.0418445	-0.365919	0.250357	-0.610418	0.766586	0.247139	-0.260411
-4.81421	-0.747017	0.21413	-0.561017	-0.40529	0.600507	0.454071	-0.0762506	-0.618505	0.251002	-0.0452228	-0.66354	-0.0270542	0.0142018	-0.284322	-0.197059	0.423248	0.253156	-0.16211	0.40684	-0.433403	-0.25274	-0.53701	-0.153589	-0.0682622	-0.094362	0.457843	-0.370587	0.456634	-0.0218008	-0.236228	0.254686	0.782427	-0.135633	0.100422	-0.0629631	-0.407722	-0.338581	-0.309488	0.140156	0.230233	-0.0516599	-0.258701	-0.0392626	-0.366642	0.250084	-0.609678	0.764232	0.246581	-0.260066
-4.81322	-0.747409	0.214224	-0.558613	-0.406501	0.600919	0.452723	-0.0776159	-0.618382	0.249086	-0.0451487	-0.664479	-0.0269527	0.0139802	-0.284825	-0.197977	0.421431	0.251649	-0.161668	0.40947	-0.434016	-0.252181	-0.538256	-0.152993	-0.0660647	-0.0931017	0.45756	-0.370764	0.456781	-0.0215261	-0.236372	0.255062	0.78156	-0.133051	0.103099	-0.0633653	-0.407961	-0.336388	-0.308823	0.140966	0.230661	-0.0499984	-0.260603	-0.0366859	-0.367371	0.24979	-0.608931	0.761862	0.246028	-0.259726
-4.81224	-0.747789	0.21434	-0.5562	-0.407714	0.601316	0.451368	-0.0789928	-0.618254	0.247166	-0.0450761	-0.665409	-0.0268445	0.0137583	-0.285322	-0.198883	0.419612	0.250131	-0.161225	0.412104	-0.43463	-0.251631	-0.539494	-0.152394	-0.0638666	-0.0918381	0.457271	-0.370953	0.456939	-0.0212357	-0.236508	0.255428	0.780677	-0.130462	0.105768	-0.0637618	-0.408194	-0.334203	-0.308171	0.141776	0.231077	-0.0483529	-0.262498	-0.0341145	-0.368107	0.249477	-0.608175	0.759478	0.24548	-0.259393
-4.81126	-0.748156	0.214476	-0.553779	-0.408927	0.601698	0.450005	-0.0803812	-0.618121	0.245242	-0.0450048	-0.666331	-0.0267297	0.0135362	-0.285813	-0.199777	0.41779	0.248602	-0.160781	0.414741	-0.435245	-0.251092	-0.540725	-0.15179	-0.061668	-0.0905711	0.456978	-0.371153	0.457106	-0.0209296	-0.236638	0.255782	0.779781	-0.127864	0.108431	-0.0641523	-0.408421	-0.332027	-0.307531	0.142587	0.231483	-0.0467234	-0.264388	-0.0315485	-0.368849	0.249143	-0.607411	0.757079	0.244939	-0.259065
-4.81027	-0.74851	0.214633	-0.551349	-0.410141	0.602066	0.448636	-0.0817809	-0.617984	0.243314	-0.0449348	-0.667244	-0.0266081	0.0133138	-0.286299	-0.200659	0.415967	0.247061	-0.160336	0.41738	-0.435861	-0.250562	-0.541949	-0.151183	-0.059469	-0.0893009	0.456679	-0.371364	0.457284	-0.0206078	-0.23676	0.256127	0.778871	-0.125259	0.111086	-0.0645369	-0.408642	-0.32986	-0.306904	0.143399	0.231877	-0.0451099	-0.266272	-0.0289882	-0.369598	0.248789	-0.606639	0.754665	0.244403	-0.258744
-4.80929	-0.748851	0.21481	-0.548911	-0.411356	0.602419	0.44726	-0.0831916	-0.617841	0.241383	-0.044866	-0.668147	-0.0264798	0.0130913	-0.286779	-0.201528	0.414141	0.24551	-0.159889	0.420023	-0.436479	-0.250041	-0.543166	-0.150572	-0.0572698	-0.0880273	0.456376	-0.371587	0.457471	-0.0202702	-0.236876	0.25646	0.777947	-0.122646	0.113734	-0.0649153	-0.408857	-0.327701	-0.306289	0.14421	0.23226	-0.0435127	-0.26815	-0.0264337	-0.370354	0.248415	-0.60586	0.752238	0.243872	-0.258428
-4.80831	-0.74918	0.215008	-0.546465	-0.412572	0.602756	0.445877	-0.0846132	-0.617695	0.239447	-0.0447982	-0.669042	-0.0263447	0.0128688	-0.287254	-0.202384	0.412313	0.243948	-0.159441	0.422668	-0.437097	-0.249531	-0.544374	-0.149957	-0.0550704	-0.0867504	0.456068	-0.371821	0.457668	-0.0199169	-0.236984	0.256783	0.77701	-0.120026	0.116374	-0.0652876	-0.409066	-0.325552	-0.305687	0.145022	0.232632	-0.0419318	-0.270022	-0.0238852	-0.371117	0.248021	-0.605072	0.749797	0.243347	-0.258119
-4.80732	-0.749495	0.215227	-0.544011	-0.413788	0.60308	0.444487	-0.0860455	-0.617543	0.237508	-0.0447314	-0.669927	-0.0262028	0.0126464	-0.287723	-0.203228	0.410483	0.242376	-0.158992	0.425315	-0.437717	-0.249031	-0.545575	-0.149339	-0.0528711	-0.0854701	0.455756	-0.372065	0.457874	-0.0195477	-0.237085	0.257096	0.776059	-0.117398	0.119007	-0.0656536	-0.409268	-0.323412	-0.305097	0.145834	0.232991	-0.0403673	-0.271887	-0.0213429	-0.371886	0.247607	-0.604277	0.747341	0.242828	-0.257816
-4.80634	-0.749798	0.215466	-0.541549	-0.415006	0.603388	0.44309	-0.0874883	-0.617387	0.235566	-0.0446653	-0.670804	-0.0260541	0.0124241	-0.288186	-0.204059	0.408652	0.240793	-0.158541	0.427965	-0.438337	-0.24854	-0.546768	-0.148716	-0.050672	-0.0841865	0.455439	-0.372321	0.45809	-0.0191628	-0.237179	0.257398	0.775096	-0.114763	0.121633	-0.0660131	-0.409464	-0.321282	-0.304521	0.146646	0.23334	-0.0388194	-0.273746	-0.0188068	-0.372661	0.247173	-0.603473	0.744873	0.242314	-0.257519
-4.80536	-0.750088	0.215725	-0.53908	-0.416223	0.603681	0.441688	-0.0889414	-0.617226	0.23362	-0.0445999	-0.671671	-0.0258984	0.012202	-0.288644	-0.204877	0.40682	0.2392	-0.15809	0.430616	-0.438959	-0.24806	-0.547952	-0.14809	-0.0484732	-0.0828995	0.455118	-0.372587	0.458316	-0.018762	-0.237266	0.257689	0.77412	-0.112121	0.124251	-0.0663662	-0.409653	-0.319161	-0.303957	0.147458	0.233676	-0.037288	-0.275598	-0.0162772	-0.373444	0.246719	-0.602662	0.742391	0.241805	-0.257228
-4.80438	-0.750366	0.216005	-0.536604	-0.417442	0.603959	0.440278	-0.0904045	-0.61706	0.231671	-0.044535	-0.672529	-0.0257359	0.0119803	-0.289097	-0.205682	0.404986	0.237598	-0.157637	0.433269	-0.439582	-0.24759	-0.549128	-0.14746	-0.0462748	-0.0816092	0.454792	-0.372864	0.458551	-0.0183454	-0.237347	0.257971	0.773132	-0.109471	0.126861	-0.0667127	-0.409835	-0.317051	-0.303406	0.14827	0.234	-0.0357734	-0.277444	-0.0137543	-0.374232	0.246245	-0.601843	0.739896	0.241302	-0.256943
-4.80339	-0.750631	0.216306	-0.53412	-0.418661	0.604223	0.438862	-0.0918776	-0.61689	0.229718	-0.0444706	-0.673378	-0.0255665	0.0117589	-0.289543	-0.206474	0.403152	0.235985	-0.157183	0.435924	-0.440206	-0.24713	-0.550295	-0.146826	-0.044077	-0.0803154	0.454462	-0.373151	0.458796	-0.0179129	-0.23742	0.258241	0.772132	-0.106814	0.129463	-0.0670525	-0.410011	-0.314951	-0.302868	0.149082	0.234313	-0.0342755	-0.279282	-0.0112382	-0.375028	0.245752	-0.601016	0.737388	0.240804	-0.256665
-4.80241	-0.750883	0.216626	-0.531629	-0.41988	0.604472	0.43744	-0.0933603	-0.616715	0.227762	-0.0444065	-0.674217	-0.0253901	0.0115379	-0.289985	-0.207253	0.401317	0.234364	-0.156728	0.43858	-0.440831	-0.246681	-0.551453	-0.146189	-0.0418799	-0.0790182	0.454128	-0.373449	0.45905	-0.0174646	-0.237486	0.258502	0.77112	-0.10415	0.132058	-0.0673856	-0.41018	-0.312862	-0.302343	0.149894	0.234613	-0.0327946	-0.281114	-0.00872907	-0.37583	0.245239	-0.600181	0.734867	0.240311	-0.256392
-4.80143	-0.751122	0.216967	-0.529132	-0.4211	0.604705	0.436012	-0.0948524	-0.616536	0.225803	-0.0443425	-0.675047	-0.0252067	0.0113175	-0.290421	-0.208019	0.399481	0.232732	-0.156272	0.441238	-0.441457	-0.246242	-0.552602	-0.145548	-0.0396837	-0.0777177	0.453791	-0.373758	0.459313	-0.0170003	-0.237546	0.258752	0.770096	-0.101479	0.134645	-0.0677118	-0.410342	-0.310783	-0.301832	0.150706	0.234901	-0.0313306	-0.282939	-0.00622707	-0.376638	0.244706	-0.599339	0.732334	0.239824	-0.256126
-4.80044	-0.751349	0.217328	-0.526628	-0.422321	0.604924	0.434578	-0.0963538	-0.616352	0.223841	-0.0442785	-0.675868	-0.0250163	0.0110976	-0.290851	-0.208772	0.397645	0.231092	-0.155815	0.443896	-0.442084	-0.245813	-0.553741	-0.144903	-0.0374885	-0.0764137	0.453449	-0.374076	0.459586	-0.0165202	-0.237599	0.258992	0.769061	-0.0988015	0.137224	-0.068031	-0.410497	-0.308715	-0.301334	0.151517	0.235177	-0.0298837	-0.284756	-0.00373237	-0.377453	0.244154	-0.598489	0.729788	0.239341	-0.255867
-4.79946	-0.751564	0.21771	-0.524117	-0.423542	0.605128	0.433138	-0.0978642	-0.616163	0.221876	-0.0442145	-0.676678	-0.0248188	0.0108785	-0.291277	-0.209511	0.395808	0.229443	-0.155357	0.446556	-0.442712	-0.245395	-0.554871	-0.144254	-0.0352945	-0.0751063	0.453104	-0.374405	0.459868	-0.0160241	-0.237645	0.259221	0.768015	-0.0961166	0.139795	-0.0683432	-0.410645	-0.306659	-0.300848	0.152328	0.23544	-0.028454	-0.286566	-0.00124514	-0.378274	0.243583	-0.597631	0.727231	0.238864	-0.255613
-4.79848	-0.751766	0.218111	-0.5216	-0.424764	0.605316	0.431691	-0.0993835	-0.61597	0.219908	-0.0441503	-0.67748	-0.0246144	0.0106601	-0.291696	-0.210237	0.393972	0.227785	-0.154898	0.449216	-0.443342	-0.244987	-0.55599	-0.143602	-0.0331018	-0.0737955	0.452754	-0.374743	0.460159	-0.015512	-0.237684	0.259441	0.766958	-0.093425	0.142358	-0.0686482	-0.410785	-0.304613	-0.300377	0.153139	0.235691	-0.0270415	-0.288369	0.00123445	-0.379102	0.242992	-0.596765	0.724661	0.238392	-0.255366
-4.79749	-0.751956	0.218532	-0.519077	-0.425986	0.60549	0.430239	-0.100911	-0.615772	0.217937	-0.0440856	-0.678271	-0.0244028	0.0104426	-0.292111	-0.210949	0.392136	0.226119	-0.154437	0.451876	-0.443972	-0.24459	-0.5571	-0.142946	-0.0309104	-0.0724813	0.452402	-0.375091	0.460459	-0.014984	-0.237717	0.25965	0.765891	-0.0907267	0.144913	-0.068946	-0.410918	-0.302579	-0.299918	0.15395	0.235929	-0.0256464	-0.290164	0.00370626	-0.379936	0.242382	-0.595891	0.72208	0.237925	-0.255126
-4.79651	-0.752133	0.218974	-0.516548	-0.427209	0.605649	0.428781	-0.102447	-0.615569	0.215964	-0.0440205	-0.679053	-0.0241841	0.0102259	-0.29252	-0.211648	0.3903	0.224445	-0.153976	0.454537	-0.444604	-0.244203	-0.558199	-0.142286	-0.0287207	-0.0711637	0.452046	-0.375449	0.460768	-0.01444	-0.237743	0.259849	0.764814	-0.0880217	0.14746	-0.0692365	-0.411044	-0.300557	-0.299474	0.15476	0.236155	-0.0242687	-0.291952	0.00617011	-0.380777	0.241753	-0.59501	0.719487	0.237463	-0.254891
-4.79553	-0.752298	0.219435	-0.514014	-0.428431	0.605793	0.427318	-0.103992	-0.615362	0.213988	-0.0439547	-0.679825	-0.0239584	0.0100103	-0.292924	-0.212333	0.388464	0.222762	-0.153514	0.457198	-0.445237	-0.243827	-0.559288	-0.141622	-0.0265327	-0.0698426	0.451686	-0.375817	0.461086	-0.01388	-0.237762	0.260038	0.763726	-0.0853101	0.149998	-0.0695196	-0.411163	-0.298547	-0.299042	0.155569	0.236368	-0.0229085	-0.293731	0.00862584	-0.381624	0.241105	-0.594122	0.716883	0.237006	-0.254664
-4.79454	-0.752451	0.219916	-0.511474	-0.429655	0.605921	0.425848	-0.105544	-0.615151	0.212009	-0.0438881	-0.680587	-0.0237255	0.00979565	-0.293323	-0.213004	0.38663	0.221071	-0.153051	0.459859	-0.445871	-0.243462	-0.560366	-0.140955	-0.0243466	-0.068518	0.451323	-0.376194	0.461412	-0.013304	-0.237775	0.260217	0.762629	-0.0825921	0.152528	-0.0697952	-0.411273	-0.296549	-0.298624	0.156378	0.236568	-0.0215658	-0.295503	0.0110733	-0.382477	0.240438	-0.593225	0.714269	0.236553	-0.254442
-4.79356	-0.752592	0.220417	-0.508929	-0.430878	0.606035	0.424374	-0.107104	-0.614935	0.210028	-0.0438206	-0.681339	-0.0234854	0.00958217	-0.293716	-0.213662	0.384796	0.219373	-0.152587	0.462519	-0.446506	-0.243107	-0.561434	-0.140284	-0.0221624	-0.06719	0.450957	-0.376581	0.461748	-0.012712	-0.237781	0.260386	0.761522	-0.0798677	0.15505	-0.0700633	-0.411376	-0.294564	-0.29822	0.157186	0.236755	-0.0202408	-0.297267	0.0135123	-0.383337	0.239752	-0.592322	0.711643	0.236106	-0.254227
-4.79258	-0.75272	0.220937	-0.506378	-0.432102	0.606134	0.422893	-0.108671	-0.614714	0.208045	-0.043752	-0.682082	-0.0232381	0.00936989	-0.294104	-0.214305	0.382963	0.217668	-0.152122	0.465179	-0.447142	-0.242763	-0.56249	-0.13961	-0.0199805	-0.0658586	0.450588	-0.376976	0.462092	-0.0121039	-0.23778	0.260545	0.760406	-0.0771371	0.157564	-0.0703237	-0.411471	-0.292591	-0.29783	0.157993	0.236929	-0.0189335	-0.299023	0.0159427	-0.384203	0.239047	-0.59141	0.709007	0.235663	-0.254019
-4.7916	-0.752836	0.221477	-0.503823	-0.433326	0.606217	0.421408	-0.110246	-0.614489	0.206059	-0.0436822	-0.682814	-0.0229837	0.00915887	-0.294488	-0.214934	0.381132	0.215955	-0.151657	0.467838	-0.447779	-0.242431	-0.563534	-0.138931	-0.0178008	-0.0645237	0.450216	-0.377381	0.462444	-0.0114798	-0.237773	0.260694	0.759282	-0.0744002	0.160069	-0.0705764	-0.411559	-0.29063	-0.297453	0.1588	0.23709	-0.017644	-0.30077	0.0183644	-0.385075	0.238323	-0.590491	0.70636	0.235225	-0.253817
-4.79061	-0.75294	0.222037	-0.501263	-0.434551	0.606286	0.419917	-0.111828	-0.61426	0.204071	-0.0436111	-0.683536	-0.0227221	0.0089492	-0.294866	-0.21555	0.379302	0.214235	-0.15119	0.470496	-0.448418	-0.242109	-0.564567	-0.138249	-0.0156235	-0.0631854	0.449841	-0.377795	0.462805	-0.0108397	-0.23776	0.260833	0.758149	-0.0716573	0.162566	-0.0708213	-0.411638	-0.288683	-0.297089	0.159606	0.237237	-0.0163724	-0.30251	0.0207771	-0.385953	0.237581	-0.589565	0.703703	0.234792	-0.253621
-4.78963	-0.753033	0.222616	-0.498698	-0.435776	0.606339	0.418421	-0.113416	-0.614025	0.202081	-0.0435384	-0.684248	-0.0224532	0.00874093	-0.295239	-0.216151	0.377473	0.212508	-0.150722	0.473154	-0.449057	-0.241798	-0.565589	-0.137564	-0.0134489	-0.0618436	0.449464	-0.378217	0.463174	-0.0101835	-0.23774	0.260962	0.757007	-0.0689083	0.165054	-0.0710582	-0.41171	-0.286749	-0.29674	0.160411	0.237372	-0.0151187	-0.304241	0.0231808	-0.386838	0.236821	-0.588631	0.701036	0.234364	-0.253432
-4.78865	-0.753113	0.223215	-0.496129	-0.437001	0.606378	0.416919	-0.115011	-0.613787	0.200088	-0.0434641	-0.68495	-0.0221771	0.00853414	-0.295607	-0.216738	0.375646	0.210774	-0.150254	0.475809	-0.449698	-0.241498	-0.566598	-0.136874	-0.011277	-0.0604984	0.449083	-0.378649	0.463552	-0.00951121	-0.237713	0.261081	0.755857	-0.0661535	0.167534	-0.0712873	-0.411773	-0.284828	-0.296404	0.161214	0.237493	-0.0138831	-0.305963	0.0255752	-0.387729	0.236042	-0.58769	0.698359	0.23394	-0.25325
-4.78766	-0.753181	0.223833	-0.493556	-0.438226	0.606401	0.415413	-0.116612	-0.613544	0.198094	-0.0433879	-0.685642	-0.0218938	0.00832889	-0.29597	-0.21731	0.373822	0.209034	-0.149785	0.478464	-0.45034	-0.241209	-0.567595	-0.136182	-0.00910797	-0.0591497	0.448701	-0.379088	0.463937	-0.00882284	-0.23768	0.261191	0.7547	-0.0633928	0.170005	-0.0715082	-0.411828	-0.282921	-0.296083	0.162017	0.237601	-0.0126655	-0.307676	0.0279602	-0.388626	0.235245	-0.586742	0.695673	0.23352	-0.253074
-4.78668	-0.753238	0.22447	-0.490978	-0.439451	0.60641	0.413901	-0.118219	-0.613297	0.196098	-0.0433098	-0.686324	-0.0216032	0.00812526	-0.296328	-0.217869	0.371999	0.207288	-0.149314	0.481116	-0.450983	-0.240931	-0.56858	-0.135485	-0.00694197	-0.0577975	0.448315	-0.379537	0.464331	-0.00811837	-0.237641	0.261291	0.753535	-0.0606265	0.172467	-0.0717211	-0.411875	-0.281027	-0.295775	0.162819	0.237695	-0.011466	-0.309381	0.0303357	-0.389529	0.23443	-0.585786	0.692978	0.233105	-0.252905
-4.7857	-0.753282	0.225127	-0.488398	-0.440677	0.606403	0.412385	-0.119832	-0.613045	0.1941	-0.0432295	-0.686995	-0.0213053	0.0079233	-0.296681	-0.218412	0.370179	0.205536	-0.148843	0.483767	-0.451627	-0.240665	-0.569553	-0.134785	-0.00477915	-0.0564419	0.447928	-0.379993	0.464733	-0.00739781	-0.237596	0.261381	0.752363	-0.0578545	0.174921	-0.0719258	-0.411914	-0.279148	-0.295481	0.163619	0.237776	-0.0102847	-0.311078	0.0327015	-0.390438	0.233597	-0.584823	0.690273	0.232695	-0.252743
-4.78471	-0.753315	0.225802	-0.485813	-0.441903	0.606381	0.410864	-0.121451	-0.612789	0.1921	-0.043147	-0.687656	-0.0210002	0.00772309	-0.29703	-0.218942	0.368361	0.203778	-0.148372	0.486415	-0.452272	-0.24041	-0.570512	-0.134081	-0.00261966	-0.0550828	0.447538	-0.380458	0.465142	-0.00666113	-0.237544	0.261462	0.751184	-0.0550771	0.177365	-0.0721222	-0.411944	-0.277282	-0.295201	0.164418	0.237843	-0.00912172	-0.312765	0.0350575	-0.391354	0.232746	-0.583852	0.68756	0.232289	-0.252587
-4.78373	-0.753336	0.226497	-0.483225	-0.443129	0.606344	0.409338	-0.123075	-0.612528	0.190099	-0.043062	-0.688306	-0.0206877	0.00752469	-0.297374	-0.219456	0.366545	0.202015	-0.147899	0.489062	-0.452918	-0.240165	-0.571459	-0.133374	-0.000463642	-0.0537203	0.447146	-0.380931	0.465559	-0.00590835	-0.237486	0.261533	0.749998	-0.0522943	0.179801	-0.0723102	-0.411966	-0.275431	-0.294935	0.165216	0.237896	-0.00797702	-0.314443	0.0374034	-0.392275	0.231877	-0.582875	0.684838	0.231887	-0.252437
-4.78275	-0.753346	0.227211	-0.480634	-0.444355	0.606292	0.407807	-0.124704	-0.612263	0.188096	-0.0429744	-0.688946	-0.020368	0.00732816	-0.297712	-0.219956	0.364733	0.200246	-0.147426	0.491705	-0.453566	-0.239933	-0.572392	-0.132663	0.00168876	-0.0523543	0.446752	-0.381411	0.465984	-0.00513944	-0.237422	0.261595	0.748806	-0.0495062	0.182229	-0.0724899	-0.411979	-0.273594	-0.294683	0.166012	0.237936	-0.00685069	-0.316112	0.0397391	-0.393202	0.230991	-0.58189	0.682107	0.231489	-0.252295
-4.78177	-0.753344	0.227943	-0.47804	-0.445581	0.606225	0.406272	-0.126337	-0.611994	0.186091	-0.042884	-0.689576	-0.0200409	0.00713356	-0.298047	-0.220442	0.362923	0.198472	-0.146951	0.494346	-0.454214	-0.239711	-0.573312	-0.131948	0.00383739	-0.0509849	0.446357	-0.381899	0.466416	-0.0043544	-0.237352	0.261647	0.747608	-0.046713	0.184647	-0.0726611	-0.411983	-0.271772	-0.294445	0.166807	0.237962	-0.00574278	-0.317772	0.0420646	-0.394135	0.230087	-0.580898	0.679369	0.231096	-0.252159
-4.78078	-0.753331	0.228694	-0.475443	-0.446807	0.606143	0.404732	-0.127976	-0.611721	0.184085	-0.0427908	-0.690195	-0.0197066	0.00694096	-0.298376	-0.220912	0.361117	0.196694	-0.146476	0.496984	-0.454864	-0.239501	-0.574219	-0.13123	0.0059821	-0.049612	0.445959	-0.382395	0.466856	-0.00355324	-0.237276	0.261689	0.746404	-0.0439147	0.187056	-0.0728237	-0.411979	-0.269965	-0.294221	0.1676	0.237975	-0.00465334	-0.319422	0.0443795	-0.395075	0.229166	-0.579899	0.676622	0.230706	-0.252029
-4.7798	-0.753306	0.229464	-0.472844	-0.448033	0.606046	0.403188	-0.129618	-0.611443	0.182078	-0.0426944	-0.690804	-0.0193649	0.00675042	-0.298701	-0.221368	0.359313	0.19491	-0.146	0.499619	-0.455515	-0.239302	-0.575112	-0.130509	0.00812274	-0.0482356	0.44556	-0.382899	0.467303	-0.00273594	-0.237193	0.261722	0.745195	-0.0411115	0.189456	-0.0729778	-0.411966	-0.268173	-0.29401	0.168392	0.237973	-0.00358243	-0.321063	0.0466839	-0.39602	0.228228	-0.578893	0.673867	0.230321	-0.251907
-4.77882	-0.753269	0.230252	-0.470242	-0.44926	0.605933	0.401639	-0.131265	-0.611161	0.180069	-0.0425948	-0.691401	-0.0190159	0.006562	-0.299022	-0.221809	0.357514	0.193122	-0.145524	0.502251	-0.456167	-0.239115	-0.575991	-0.129783	0.0102592	-0.0468559	0.445159	-0.383409	0.467757	-0.0019025	-0.237105	0.261746	0.74398	-0.0383035	0.191847	-0.0731232	-0.411945	-0.266396	-0.293815	0.169182	0.237958	-0.0025301	-0.322695	0.0489775	-0.39697	0.227273	-0.57788	0.671105	0.22994	-0.251791
-4.77783	-0.753222	0.231059	-0.467638	-0.450486	0.605806	0.400086	-0.132915	-0.610875	0.178059	-0.0424918	-0.691989	-0.0186596	0.00637575	-0.299337	-0.222235	0.355718	0.19133	-0.145046	0.504879	-0.45682	-0.238939	-0.576856	-0.129055	0.0123912	-0.0454727	0.444757	-0.383927	0.468218	-0.00105292	-0.23701	0.261761	0.742761	-0.0354908	0.194229	-0.0732598	-0.411914	-0.264634	-0.293633	0.16997	0.237928	-0.00149638	-0.324316	0.0512601	-0.397927	0.2263	-0.576861	0.668336	0.229563	-0.251682
-4.77685	-0.753163	0.231885	-0.465032	-0.451712	0.605664	0.398529	-0.134569	-0.610584	0.176049	-0.0423852	-0.692565	-0.0182959	0.00619173	-0.299649	-0.222645	0.353925	0.189534	-0.144568	0.507503	-0.457474	-0.238775	-0.577706	-0.128323	0.0145188	-0.044086	0.444354	-0.384452	0.468686	-0.000187208	-0.23691	0.261766	0.741536	-0.0326734	0.196602	-0.0733877	-0.411875	-0.262888	-0.293465	0.170756	0.237885	-0.000481334	-0.325929	0.0535317	-0.39889	0.225311	-0.575834	0.66556	0.229189	-0.251579
-4.77587	-0.753093	0.232729	-0.462424	-0.452939	0.605506	0.396967	-0.136227	-0.610289	0.174037	-0.0422749	-0.693131	-0.0179249	0.00601001	-0.299956	-0.223041	0.352137	0.187734	-0.144089	0.510124	-0.45813	-0.238622	-0.578542	-0.127587	0.0166417	-0.042696	0.443949	-0.384984	0.469161	0.000694648	-0.236803	0.261762	0.740308	-0.0298517	0.198966	-0.0735066	-0.411826	-0.261158	-0.293311	0.171541	0.237827	0.000515012	-0.327531	0.0557921	-0.399858	0.224306	-0.5748	0.662776	0.22882	-0.251484
-4.77488	-0.753012	0.233591	-0.459815	-0.454165	0.605334	0.395402	-0.137887	-0.609991	0.172024	-0.0421606	-0.693687	-0.0175466	0.00583063	-0.300258	-0.223422	0.350353	0.185931	-0.143609	0.51274	-0.458786	-0.238481	-0.579364	-0.126848	0.0187597	-0.0413025	0.443543	-0.385522	0.469643	0.00159264	-0.236691	0.261749	0.739075	-0.0270256	0.20132	-0.0736167	-0.411769	-0.259444	-0.293171	0.172323	0.237755	0.00149261	-0.329124	0.0580411	-0.400831	0.223283	-0.57376	0.659986	0.228454	-0.251395
-4.7739	-0.75292	0.234471	-0.457204	-0.455391	0.605146	0.393832	-0.13955	-0.609688	0.17001	-0.0420423	-0.694231	-0.017161	0.00565365	-0.300557	-0.223788	0.348573	0.184124	-0.143128	0.515352	-0.459444	-0.238351	-0.58017	-0.126106	0.0208728	-0.0399056	0.443136	-0.386067	0.470131	0.00250678	-0.236573	0.261727	0.737839	-0.0241952	0.203665	-0.0737178	-0.411702	-0.257746	-0.293046	0.173104	0.23767	0.00245142	-0.330706	0.0602786	-0.401811	0.222245	-0.572713	0.65719	0.228092	-0.251312
-4.77292	-0.752817	0.235369	-0.454592	-0.456617	0.604944	0.392258	-0.141215	-0.609381	0.167996	-0.0419197	-0.694765	-0.016768	0.00547913	-0.300851	-0.224138	0.346797	0.182314	-0.142647	0.517959	-0.460103	-0.238234	-0.580962	-0.12536	0.0229808	-0.0385053	0.442728	-0.386619	0.470625	0.00343705	-0.236448	0.261696	0.736599	-0.0213608	0.206001	-0.0738099	-0.411626	-0.256064	-0.292934	0.173882	0.23757	0.00339142	-0.332279	0.0625045	-0.402796	0.22119	-0.571659	0.654387	0.227734	-0.251237
-4.77193	-0.752703	0.236285	-0.45198	-0.457844	0.604726	0.390681	-0.142883	-0.609069	0.165981	-0.0417926	-0.695287	-0.0163677	0.00530712	-0.301141	-0.224473	0.345026	0.180501	-0.142164	0.520562	-0.460762	-0.238127	-0.581738	-0.12461	0.0250835	-0.0371016	0.44232	-0.387176	0.471126	0.00438346	-0.236319	0.261656	0.735355	-0.0185225	0.208327	-0.0738929	-0.411541	-0.254398	-0.292837	0.174658	0.237456	0.00431255	-0.333841	0.0647186	-0.403786	0.220119	-0.570599	0.651579	0.22738	-0.251169
-4.77095	-0.752578	0.237219	-0.449366	-0.45907	0.604494	0.389099	-0.144553	-0.608754	0.163965	-0.041661	-0.695799	-0.0159601	0.00513767	-0.301426	-0.224793	0.34326	0.178685	-0.141681	0.52316	-0.461423	-0.238033	-0.582499	-0.123857	0.0271808	-0.0356945	0.44191	-0.38774	0.471632	0.00534599	-0.236183	0.261607	0.734109	-0.0156803	0.210644	-0.0739667	-0.411447	-0.252749	-0.292753	0.175432	0.237328	0.0052148	-0.335394	0.0669207	-0.404782	0.219033	-0.569532	0.648764	0.227029	-0.251107
-4.76997	-0.752442	0.238171	-0.446752	-0.460296	0.604246	0.387514	-0.146224	-0.608435	0.161948	-0.0415246	-0.6963	-0.0155452	0.00497083	-0.301708	-0.225097	0.341498	0.176868	-0.141198	0.525752	-0.462086	-0.23795	-0.583245	-0.123101	0.0292726	-0.0342841	0.441501	-0.38831	0.472145	0.00632466	-0.236042	0.261549	0.73286	-0.0128344	0.212952	-0.0740314	-0.411343	-0.251117	-0.292684	0.176203	0.237185	0.00609813	-0.336936	0.0691108	-0.405784	0.21793	-0.568458	0.645944	0.226681	-0.251052
-4.76899	-0.752296	0.239141	-0.444138	-0.461522	0.603984	0.385925	-0.147897	-0.608112	0.159932	-0.0413832	-0.696791	-0.0151229	0.00480665	-0.301986	-0.225386	0.339742	0.175047	-0.140713	0.52834	-0.462749	-0.237879	-0.583974	-0.122342	0.0313586	-0.0328702	0.44109	-0.388886	0.472664	0.00731944	-0.235895	0.261482	0.731609	-0.00998487	0.21525	-0.0740868	-0.41123	-0.249501	-0.292629	0.176972	0.237028	0.00696252	-0.338467	0.0712887	-0.40679	0.216812	-0.567378	0.643119	0.226337	-0.251004
-4.768	-0.752139	0.240128	-0.441523	-0.462747	0.603706	0.384333	-0.149571	-0.607785	0.157914	-0.0412367	-0.69727	-0.0146934	0.00464519	-0.302259	-0.22566	0.33799	0.173225	-0.140227	0.530921	-0.463413	-0.23782	-0.584688	-0.121579	0.0334387	-0.031453	0.44068	-0.389467	0.473188	0.00833033	-0.235742	0.261406	0.730356	-0.00713195	0.217539	-0.0741329	-0.411108	-0.247903	-0.292588	0.177739	0.236857	0.00780793	-0.339988	0.0734542	-0.407802	0.215679	-0.566292	0.640289	0.225996	-0.250963
-4.76702	-0.751972	0.241132	-0.438909	-0.463973	0.603414	0.382737	-0.151246	-0.607453	0.155897	-0.0410848	-0.697738	-0.0142566	0.00448648	-0.302529	-0.225918	0.336245	0.171401	-0.139741	0.533497	-0.464079	-0.237772	-0.585386	-0.120813	0.0355128	-0.0300325	0.440269	-0.390054	0.473718	0.00935733	-0.235584	0.261322	0.729101	-0.00427573	0.219818	-0.0741697	-0.410976	-0.246322	-0.29256	0.178503	0.236672	0.00863434	-0.341499	0.0756072	-0.40882	0.214531	-0.565199	0.637453	0.225658	-0.250928
-4.76604	-0.751794	0.242154	-0.436295	-0.465198	0.603106	0.381137	-0.152922	-0.607118	0.153879	-0.0409275	-0.698195	-0.0138124	0.00433057	-0.302795	-0.22616	0.334504	0.169576	-0.139254	0.536067	-0.464746	-0.237737	-0.586068	-0.120043	0.0375808	-0.0286086	0.439858	-0.390647	0.474254	0.0104004	-0.23542	0.261229	0.727844	-0.00141634	0.222087	-0.0741971	-0.410834	-0.244758	-0.292547	0.179264	0.236472	0.00944174	-0.342999	0.0777476	-0.409842	0.213367	-0.5641	0.634613	0.225324	-0.2509
-4.76505	-0.751606	0.243193	-0.433681	-0.466424	0.602784	0.379534	-0.154598	-0.606779	0.151861	-0.0407645	-0.698641	-0.013361	0.00417751	-0.303057	-0.226387	0.332769	0.167749	-0.138766	0.538631	-0.465414	-0.237713	-0.586733	-0.11927	0.0396424	-0.0271814	0.439447	-0.391244	0.474795	0.0114596	-0.235251	0.261128	0.726586	0.00144608	0.224347	-0.0742151	-0.410683	-0.243212	-0.292548	0.180022	0.236258	0.0102301	-0.344488	0.0798752	-0.41087	0.212188	-0.562995	0.631769	0.224993	-0.25088
-4.76407	-0.751407	0.244249	-0.431069	-0.467649	0.602447	0.377928	-0.156274	-0.606437	0.149843	-0.0405957	-0.699076	-0.0129024	0.00402735	-0.303315	-0.226598	0.33104	0.165922	-0.138277	0.541188	-0.466083	-0.237701	-0.587382	-0.118494	0.0416975	-0.0257509	0.439036	-0.391847	0.475341	0.0125349	-0.235076	0.261017	0.725327	0.0043114	0.226597	-0.0742236	-0.410522	-0.241684	-0.292563	0.180778	0.23603	0.0109994	-0.345967	0.08199	-0.411903	0.210995	-0.561883	0.628921	0.224665	-0.250866
-4.76309	-0.751198	0.245323	-0.428457	-0.468874	0.602095	0.376318	-0.15795	-0.60609	0.147826	-0.0404208	-0.699501	-0.0124364	0.00388012	-0.30357	-0.226794	0.329317	0.164093	-0.137788	0.543739	-0.466753	-0.237702	-0.588014	-0.117715	0.0437461	-0.024317	0.438625	-0.392454	0.475892	0.0136262	-0.234896	0.260899	0.724068	0.00717947	0.228837	-0.0742226	-0.410352	-0.240173	-0.292592	0.181531	0.235787	0.0117496	-0.347434	0.0840917	-0.412941	0.209787	-0.560766	0.626068	0.22434	-0.250859
-4.7621	-0.750979	0.246413	-0.425846	-0.470099	0.601728	0.374705	-0.159625	-0.60574	0.145808	-0.0402397	-0.699914	-0.0119632	0.00373587	-0.303821	-0.226974	0.3276	0.162264	-0.137297	0.546283	-0.467424	-0.237714	-0.588629	-0.116932	0.0457878	-0.0228799	0.438215	-0.393067	0.476448	0.0147336	-0.23471	0.260772	0.722808	0.0100502	0.231068	-0.074212	-0.410172	-0.23868	-0.292634	0.182281	0.23553	0.0124807	-0.348891	0.0861802	-0.413984	0.208565	-0.559642	0.623212	0.224018	-0.250859
-4.76112	-0.75075	0.24752	-0.423237	-0.471323	0.601346	0.373089	-0.1613	-0.605386	0.14379	-0.0400522	-0.700315	-0.0114828	0.00359464	-0.304068	-0.227139	0.325889	0.160434	-0.136806	0.54882	-0.468096	-0.237738	-0.589227	-0.116146	0.0478226	-0.0214395	0.437805	-0.393684	0.477008	0.015857	-0.234519	0.260636	0.721548	0.0129233	0.233289	-0.0741918	-0.409982	-0.237206	-0.292691	0.183027	0.235259	0.0131928	-0.350337	0.0882555	-0.415032	0.207329	-0.558512	0.620352	0.223699	-0.250865
-4.76014	-0.750511	0.248644	-0.420629	-0.472548	0.60095	0.37147	-0.162974	-0.605028	0.141773	-0.0398582	-0.700706	-0.0109952	0.00345646	-0.304312	-0.227287	0.324184	0.158605	-0.136313	0.551349	-0.46877	-0.237774	-0.589809	-0.115357	0.0498504	-0.0199959	0.437395	-0.394305	0.477573	0.0169965	-0.234323	0.260492	0.720288	0.0157988	0.2355	-0.074162	-0.409783	-0.23575	-0.292761	0.183771	0.234973	0.0138857	-0.351772	0.0903173	-0.416085	0.206078	-0.557377	0.617489	0.223383	-0.250879
-4.75916	-0.750261	0.249784	-0.418023	-0.473772	0.600538	0.369847	-0.164646	-0.604666	0.139756	-0.0396573	-0.701086	-0.0105004	0.00332139	-0.304553	-0.22742	0.322486	0.156775	-0.13582	0.553872	-0.469445	-0.237822	-0.590372	-0.114565	0.0518709	-0.018549	0.436986	-0.394931	0.478143	0.018152	-0.234122	0.26034	0.719029	0.0186765	0.237701	-0.0741225	-0.409574	-0.234312	-0.292846	0.184511	0.234673	0.0145595	-0.353195	0.0923656	-0.417143	0.204814	-0.556235	0.614623	0.22307	-0.250899
-4.75817	-0.750002	0.250941	-0.415419	-0.474996	0.600112	0.368222	-0.166317	-0.604301	0.137739	-0.0394496	-0.701454	-0.00999838	0.00318945	-0.30479	-0.227537	0.320794	0.154946	-0.135326	0.556387	-0.47012	-0.237882	-0.590919	-0.11377	0.053884	-0.0170989	0.436578	-0.395561	0.478717	0.0193234	-0.233915	0.26018	0.71777	0.0215562	0.239893	-0.0740734	-0.409354	-0.232892	-0.292944	0.185248	0.234358	0.0152142	-0.354608	0.0944002	-0.418205	0.203536	-0.555088	0.611755	0.222759	-0.250927
-4.75719	-0.749734	0.252114	-0.412817	-0.476219	0.599671	0.366594	-0.167987	-0.603932	0.135723	-0.0392346	-0.701812	-0.0094892	0.00306068	-0.305024	-0.227638	0.319109	0.153117	-0.134831	0.558894	-0.470797	-0.237954	-0.591447	-0.112971	0.0558896	-0.0156455	0.436171	-0.396195	0.479295	0.0205109	-0.233703	0.260012	0.716513	0.0244378	0.242074	-0.0740145	-0.409125	-0.231492	-0.293056	0.185982	0.23403	0.0158497	-0.356009	0.096421	-0.419272	0.202245	-0.553935	0.608883	0.222451	-0.250961
-4.75621	-0.749455	0.253303	-0.410217	-0.477443	0.599216	0.364962	-0.169654	-0.60356	0.133708	-0.0390124	-0.702158	-0.00897288	0.00293511	-0.305254	-0.227724	0.317431	0.151289	-0.134335	0.561393	-0.471475	-0.238038	-0.591958	-0.11217	0.0578875	-0.014189	0.435765	-0.396832	0.479877	0.0217142	-0.233486	0.259835	0.715257	0.0273211	0.244246	-0.0739458	-0.408887	-0.23011	-0.293181	0.186712	0.233686	0.0164661	-0.357399	0.0984279	-0.420344	0.20094	-0.552776	0.606009	0.222146	-0.251002
-4.75522	-0.749167	0.254509	-0.407621	-0.478666	0.598745	0.363328	-0.171318	-0.603184	0.131693	-0.0387826	-0.702493	-0.00844942	0.00281278	-0.305482	-0.227794	0.31576	0.149462	-0.133839	0.563884	-0.472154	-0.238134	-0.592452	-0.111365	0.0598776	-0.0127293	0.43536	-0.397474	0.480462	0.0229336	-0.233264	0.259651	0.714002	0.030206	0.246408	-0.0738673	-0.408638	-0.228747	-0.293321	0.187439	0.233329	0.0170634	-0.358777	0.100421	-0.421421	0.199622	-0.551611	0.603133	0.221843	-0.25105
-4.75424	-0.748869	0.255731	-0.405027	-0.479889	0.59826	0.361692	-0.172981	-0.602805	0.129679	-0.0385452	-0.702816	-0.00791886	0.00269372	-0.305706	-0.227847	0.314096	0.147637	-0.133341	0.566367	-0.472835	-0.238242	-0.592927	-0.110557	0.0618597	-0.0112664	0.434956	-0.398119	0.481052	0.0241688	-0.233036	0.259458	0.712749	0.0330924	0.248559	-0.073779	-0.408379	-0.227403	-0.293474	0.188162	0.232957	0.0176415	-0.360145	0.102399	-0.422502	0.198291	-0.550441	0.600255	0.221543	-0.251105
-4.75326	-0.748562	0.256968	-0.402436	-0.481111	0.597761	0.360052	-0.17464	-0.602422	0.127665	-0.0382998	-0.703129	-0.00738122	0.00257796	-0.305927	-0.227885	0.312439	0.145813	-0.132842	0.568841	-0.473516	-0.238362	-0.593384	-0.109746	0.0638336	-0.00980039	0.434553	-0.398767	0.481645	0.02542	-0.232804	0.259258	0.711498	0.0359801	0.250701	-0.0736809	-0.40811	-0.226079	-0.29364	0.188881	0.232571	0.0182005	-0.3615	0.104364	-0.423587	0.196948	-0.549266	0.597376	0.221245	-0.251167
-4.75227	-0.748246	0.258221	-0.399848	-0.482333	0.597247	0.35841	-0.176296	-0.602036	0.125653	-0.0380464	-0.70343	-0.00683651	0.00246554	-0.306145	-0.227907	0.31079	0.14399	-0.132342	0.571306	-0.474198	-0.238495	-0.593822	-0.108933	0.0657993	-0.00833125	0.434152	-0.399419	0.482241	0.026687	-0.232566	0.259049	0.71025	0.0388689	0.252832	-0.0735728	-0.407832	-0.224773	-0.29382	0.189597	0.232171	0.0187404	-0.362844	0.106314	-0.424677	0.195592	-0.548085	0.594495	0.220949	-0.251236
-4.75129	-0.74792	0.25949	-0.397264	-0.483555	0.596718	0.356766	-0.177948	-0.601646	0.123642	-0.0377847	-0.70372	-0.00628476	0.00235648	-0.30636	-0.227913	0.309148	0.14217	-0.131842	0.573762	-0.474882	-0.238639	-0.594243	-0.108116	0.0677565	-0.00685902	0.433752	-0.400073	0.48284	0.0279699	-0.232324	0.258833	0.709004	0.0417587	0.254954	-0.0734549	-0.407543	-0.223488	-0.294014	0.190308	0.231756	0.0192612	-0.364177	0.108249	-0.425771	0.194223	-0.546899	0.591612	0.220656	-0.251311
-4.75031	-0.747585	0.260775	-0.394683	-0.484777	0.596174	0.355118	-0.179597	-0.601253	0.121631	-0.0375146	-0.703999	-0.00572599	0.0022508	-0.306573	-0.227904	0.307514	0.140352	-0.13134	0.57621	-0.475567	-0.238795	-0.594644	-0.107296	0.0697052	-0.0053837	0.433354	-0.400731	0.483443	0.0292686	-0.232077	0.258609	0.707761	0.0446493	0.257065	-0.073327	-0.407244	-0.222221	-0.294221	0.191016	0.231327	0.0197629	-0.365497	0.11017	-0.42687	0.192843	-0.545707	0.588729	0.220365	-0.251394
-4.74932	-0.74724	0.262075	-0.392107	-0.485998	0.595617	0.353469	-0.181242	-0.600857	0.119622	-0.0372358	-0.704267	-0.00516024	0.00214854	-0.306783	-0.227878	0.305887	0.138536	-0.130837	0.578648	-0.476252	-0.238964	-0.595028	-0.106473	0.0716451	-0.00390532	0.432957	-0.401391	0.484048	0.0305831	-0.231825	0.258378	0.706522	0.0475406	0.259167	-0.0731892	-0.406936	-0.220975	-0.294441	0.191719	0.230884	0.0202455	-0.366806	0.112076	-0.427972	0.19145	-0.54451	0.585845	0.220076	-0.251483
-4.74834	-0.746887	0.26339	-0.389534	-0.487219	0.595044	0.351817	-0.182883	-0.600457	0.117614	-0.0369482	-0.704523	-0.00458752	0.00204971	-0.306989	-0.227836	0.304269	0.136723	-0.130333	0.581076	-0.476939	-0.239145	-0.595392	-0.105647	0.0735761	-0.0024239	0.432563	-0.402054	0.484656	0.0319134	-0.231568	0.258139	0.705286	0.0504324	0.261258	-0.0730414	-0.406617	-0.219748	-0.294675	0.192419	0.230427	0.020709	-0.368104	0.113967	-0.429079	0.190046	-0.543309	0.58296	0.219789	-0.251579
-4.74736	-0.746525	0.26472	-0.386966	-0.48844	0.594458	0.350162	-0.184519	-0.600055	0.115607	-0.0366515	-0.704768	-0.00400787	0.00195435	-0.307194	-0.227779	0.302658	0.134912	-0.129828	0.583494	-0.477627	-0.239337	-0.595737	-0.104819	0.0754981	-0.000939462	0.43217	-0.402719	0.485267	0.0332594	-0.231306	0.257892	0.704053	0.0533245	0.263339	-0.0728837	-0.406288	-0.218541	-0.294922	0.193114	0.229955	0.0211534	-0.369389	0.115844	-0.43019	0.188631	-0.542102	0.580075	0.219504	-0.251682
-4.74638	-0.746153	0.266066	-0.384402	-0.48966	0.593856	0.348505	-0.18615	-0.599649	0.113602	-0.0363456	-0.705002	-0.00342131	0.00186247	-0.307395	-0.227705	0.301055	0.133105	-0.129322	0.585903	-0.478316	-0.239542	-0.596064	-0.103987	0.0774109	0.00054797	0.431779	-0.403387	0.485879	0.0346211	-0.231039	0.257638	0.702825	0.0562169	0.265409	-0.0727159	-0.405949	-0.217354	-0.295182	0.193805	0.22947	0.0215788	-0.370663	0.117705	-0.431305	0.187203	-0.54089	0.57719	0.219221	-0.251792
-4.74539	-0.745773	0.267426	-0.381843	-0.49088	0.593241	0.346846	-0.187776	-0.59924	0.111598	-0.0360303	-0.705225	-0.00282788	0.0017741	-0.307594	-0.227616	0.29946	0.131301	-0.128815	0.588302	-0.479006	-0.239759	-0.596371	-0.103153	0.0793144	0.00203837	0.431391	-0.404057	0.486494	0.0359985	-0.230768	0.257377	0.701601	0.0591093	0.26747	-0.0725381	-0.405601	-0.216188	-0.295455	0.194492	0.22897	0.0219852	-0.371924	0.119551	-0.432423	0.185765	-0.539673	0.574305	0.218941	-0.251909
-4.74441	-0.745385	0.268801	-0.379289	-0.492099	0.592611	0.345185	-0.189397	-0.598828	0.109596	-0.0357055	-0.705436	-0.0022276	0.00168926	-0.307791	-0.22751	0.297874	0.129501	-0.128307	0.59069	-0.479698	-0.239988	-0.596659	-0.102316	0.0812085	0.00353172	0.431005	-0.404728	0.487111	0.0373916	-0.230492	0.257108	0.700382	0.0620016	0.26952	-0.0723503	-0.405242	-0.215041	-0.295742	0.195174	0.228457	0.0223726	-0.373174	0.121381	-0.433546	0.184316	-0.538451	0.57142	0.218661	-0.252033
-4.74343	-0.744987	0.270191	-0.376741	-0.493318	0.591967	0.343522	-0.191012	-0.598412	0.107595	-0.0353708	-0.705636	-0.0016205	0.00160796	-0.307985	-0.227389	0.296296	0.127705	-0.127797	0.593068	-0.48039	-0.240229	-0.596927	-0.101476	0.0830928	0.005028	0.430621	-0.405402	0.48773	0.0388002	-0.230212	0.256832	0.699167	0.0648936	0.27156	-0.0721525	-0.404873	-0.213915	-0.296041	0.195851	0.227929	0.022741	-0.374412	0.123197	-0.434672	0.182856	-0.537224	0.568536	0.218384	-0.252163
-4.74244	-0.744581	0.271595	-0.374197	-0.494537	0.591309	0.341856	-0.192621	-0.597994	0.105596	-0.0350261	-0.705825	-0.00100663	0.00153022	-0.308177	-0.227252	0.294727	0.125912	-0.127286	0.595435	-0.481084	-0.240483	-0.597177	-0.100633	0.0849675	0.00652717	0.43024	-0.406077	0.488351	0.0402245	-0.229926	0.256549	0.697957	0.0677852	0.273589	-0.0719446	-0.404493	-0.21281	-0.296353	0.196524	0.227388	0.0230904	-0.375637	0.124996	-0.435802	0.181385	-0.535993	0.565653	0.218108	-0.252301
-4.74146	-0.744167	0.273014	-0.371659	-0.495755	0.590636	0.340189	-0.194224	-0.597573	0.103599	-0.0346712	-0.706002	-0.000386011	0.00145606	-0.308367	-0.227098	0.293166	0.124124	-0.126775	0.597791	-0.481778	-0.240748	-0.597406	-0.0997872	0.0868322	0.00802922	0.429861	-0.406754	0.488973	0.0416642	-0.229637	0.256258	0.696753	0.0706762	0.275609	-0.0717266	-0.404104	-0.211724	-0.296679	0.197192	0.226832	0.0234209	-0.376851	0.126781	-0.436936	0.179905	-0.534757	0.562771	0.217834	-0.252445
-4.74048	-0.743744	0.274447	-0.369127	-0.496973	0.589949	0.338519	-0.19582	-0.597149	0.101604	-0.034306	-0.706169	0.00024132	0.00138549	-0.308554	-0.226929	0.291614	0.122341	-0.126261	0.600137	-0.482474	-0.241025	-0.597616	-0.0989389	0.0886868	0.00953411	0.429485	-0.407432	0.489597	0.0431195	-0.229342	0.255961	0.695554	0.0735664	0.277618	-0.0714986	-0.403705	-0.21066	-0.297017	0.197855	0.226263	0.0237326	-0.378052	0.128549	-0.438073	0.178414	-0.533517	0.559889	0.217562	-0.252596
-4.73949	-0.743312	0.275894	-0.366602	-0.49819	0.589248	0.336848	-0.19741	-0.596723	0.0996106	-0.0339302	-0.706324	0.000875328	0.00131853	-0.30874	-0.226744	0.290071	0.120562	-0.125747	0.602471	-0.48317	-0.241315	-0.597806	-0.0980878	0.0905312	0.0110418	0.429111	-0.408111	0.490221	0.0445903	-0.229044	0.255657	0.694361	0.0764556	0.279616	-0.0712605	-0.403296	-0.209616	-0.297367	0.198514	0.22568	0.0240253	-0.379241	0.130302	-0.439214	0.176913	-0.532272	0.55701	0.217291	-0.252754
-4.73851	-0.742873	0.277355	-0.364082	-0.499407	0.588533	0.335174	-0.198992	-0.596293	0.0976193	-0.0335437	-0.706467	0.00151597	0.00125519	-0.308923	-0.226543	0.288537	0.118788	-0.125231	0.604793	-0.483868	-0.241616	-0.597976	-0.0972341	0.0923653	0.0125523	0.428741	-0.408792	0.490847	0.0460765	-0.228741	0.255345	0.693175	0.0793438	0.281604	-0.0710123	-0.402876	-0.208594	-0.297731	0.199167	0.225083	0.0242993	-0.380418	0.132038	-0.440358	0.175402	-0.531023	0.554132	0.217021	-0.252919
-4.73753	-0.742425	0.27883	-0.361568	-0.500624	0.587804	0.333499	-0.200568	-0.595861	0.0956301	-0.0331462	-0.7066	0.00216322	0.00119548	-0.309104	-0.226327	0.287011	0.11702	-0.124714	0.607104	-0.484567	-0.24193	-0.598127	-0.0963777	0.0941889	0.0140656	0.428373	-0.409473	0.491473	0.047578	-0.228433	0.255027	0.691994	0.0822307	0.283582	-0.070754	-0.402447	-0.207592	-0.298107	0.199815	0.224472	0.0245544	-0.381583	0.133759	-0.441505	0.173882	-0.529769	0.551256	0.216753	-0.25309
-4.73655	-0.74197	0.280319	-0.359062	-0.50184	0.587062	0.331822	-0.202136	-0.595426	0.0936431	-0.0327375	-0.706722	0.00281703	0.0011394	-0.309284	-0.226094	0.285495	0.115256	-0.124196	0.609404	-0.485267	-0.242256	-0.598257	-0.0955186	0.0960018	0.0155816	0.428009	-0.410155	0.4921	0.049095	-0.228121	0.254702	0.69082	0.0851162	0.285549	-0.0704857	-0.402007	-0.206611	-0.298495	0.200458	0.223848	0.0247908	-0.382735	0.135464	-0.442656	0.172353	-0.528511	0.548382	0.216486	-0.253268
-4.73556	-0.741506	0.281821	-0.356562	-0.503056	0.586305	0.330143	-0.203695	-0.594988	0.0916583	-0.0323176	-0.706832	0.00347736	0.00108697	-0.309461	-0.225846	0.283988	0.113499	-0.123676	0.611691	-0.485967	-0.242593	-0.598367	-0.094657	0.0978039	0.0171003	0.427648	-0.410837	0.492728	0.0506272	-0.227805	0.25437	0.689653	0.0880001	0.287506	-0.0702072	-0.401558	-0.205651	-0.298896	0.201096	0.22321	0.0250085	-0.383875	0.137152	-0.443809	0.170814	-0.527249	0.545511	0.216221	-0.253454
-4.73458	-0.741034	0.283337	-0.354069	-0.504271	0.585534	0.328463	-0.205247	-0.594548	0.0896759	-0.031886	-0.706931	0.00414417	0.0010382	-0.309637	-0.225581	0.28249	0.111747	-0.123155	0.613966	-0.486669	-0.242943	-0.598457	-0.0937927	0.0995951	0.0186217	0.42729	-0.41152	0.493356	0.0521746	-0.227484	0.254032	0.688493	0.0908822	0.289452	-0.0699187	-0.401098	-0.204712	-0.299309	0.201728	0.222559	0.0252075	-0.385002	0.138824	-0.444966	0.169267	-0.525983	0.542642	0.215956	-0.253646
-4.7336	-0.740555	0.284866	-0.351584	-0.505486	0.584749	0.326781	-0.206791	-0.594105	0.0876959	-0.0314428	-0.707019	0.00481742	0.000993084	-0.309811	-0.225301	0.281002	0.110002	-0.122633	0.616229	-0.487372	-0.243305	-0.598526	-0.0929259	0.101375	0.0201458	0.426935	-0.412204	0.493984	0.0537373	-0.22716	0.253687	0.687341	0.0937624	0.291388	-0.0696201	-0.400628	-0.203795	-0.299734	0.202355	0.221895	0.0253879	-0.386117	0.14048	-0.446126	0.167711	-0.524713	0.539775	0.215693	-0.253844
-4.73261	-0.740068	0.286408	-0.349106	-0.5067	0.583951	0.325097	-0.208325	-0.59366	0.0857184	-0.0309877	-0.707095	0.00549706	0.000951635	-0.309984	-0.225005	0.279523	0.108262	-0.122109	0.61848	-0.488076	-0.243679	-0.598576	-0.0920565	0.103144	0.0216724	0.426584	-0.412887	0.494612	0.0553151	-0.226831	0.253335	0.686196	0.0966405	0.293313	-0.0693115	-0.400149	-0.202899	-0.300171	0.202976	0.221217	0.0255496	-0.38722	0.14212	-0.447288	0.166146	-0.523439	0.536912	0.21543	-0.25405
-4.73163	-0.739573	0.287964	-0.346636	-0.507914	0.583139	0.323412	-0.209851	-0.593212	0.0837435	-0.0305204	-0.707161	0.00618306	0.000913852	-0.310155	-0.224694	0.278054	0.10653	-0.121584	0.620717	-0.488781	-0.244064	-0.598604	-0.0911847	0.104902	0.0232017	0.426236	-0.413571	0.49524	0.0569081	-0.226498	0.252977	0.685058	0.0995163	0.295228	-0.0689927	-0.399659	-0.202024	-0.300621	0.203592	0.220525	0.0256929	-0.38831	0.143742	-0.448454	0.164574	-0.522161	0.534053	0.215169	-0.254262
-4.73065	-0.739071	0.289532	-0.344173	-0.509127	0.582313	0.321725	-0.211368	-0.592762	0.0817713	-0.0300409	-0.707215	0.00687536	0.000879739	-0.310324	-0.224366	0.276594	0.104804	-0.121057	0.622942	-0.489488	-0.244462	-0.598612	-0.0903103	0.106648	0.0247335	0.425892	-0.414254	0.495867	0.0585161	-0.22616	0.252613	0.683929	0.10239	0.297132	-0.068664	-0.399159	-0.201171	-0.301082	0.204202	0.219821	0.0258177	-0.389388	0.145349	-0.449622	0.162993	-0.52088	0.531196	0.214909	-0.254481
-4.72966	-0.738561	0.291113	-0.341719	-0.51034	0.581474	0.320037	-0.212875	-0.592309	0.0798018	-0.0295489	-0.707258	0.00757392	0.000849297	-0.310492	-0.224024	0.275144	0.103085	-0.120528	0.625154	-0.490195	-0.244872	-0.5986	-0.0894335	0.108382	0.0262678	0.425552	-0.414937	0.496494	0.0601391	-0.225819	0.252242	0.682808	0.10526	0.299026	-0.0683251	-0.39865	-0.200339	-0.301555	0.204806	0.219103	0.025924	-0.390453	0.146938	-0.450793	0.161404	-0.519594	0.528344	0.214649	-0.254707
-4.72868	-0.738043	0.292706	-0.339273	-0.511553	0.580621	0.318347	-0.214373	-0.591855	0.0778352	-0.0290442	-0.707291	0.00827869	0.000822523	-0.310659	-0.223665	0.273704	0.101374	-0.119998	0.627353	-0.490903	-0.245293	-0.598567	-0.0885543	0.110105	0.0278047	0.425216	-0.415619	0.49712	0.061777	-0.225474	0.251865	0.681696	0.108128	0.300909	-0.0679762	-0.39813	-0.199529	-0.30204	0.205404	0.218372	0.026012	-0.391505	0.148511	-0.451966	0.159808	-0.518305	0.525495	0.214391	-0.254939
-4.7277	-0.737519	0.294312	-0.336836	-0.512764	0.579755	0.316656	-0.21586	-0.591398	0.0758715	-0.0285266	-0.707312	0.00898963	0.000799417	-0.310824	-0.223291	0.272274	0.0996697	-0.119467	0.629539	-0.491612	-0.245727	-0.598513	-0.0876727	0.111815	0.029344	0.424884	-0.416301	0.497745	0.0634298	-0.225125	0.251482	0.680592	0.110993	0.302781	-0.0676173	-0.397601	-0.19874	-0.302537	0.205997	0.217629	0.0260816	-0.392545	0.150067	-0.453142	0.158205	-0.517013	0.52265	0.214133	-0.255178
-4.72671	-0.736987	0.295931	-0.334407	-0.513976	0.578875	0.314963	-0.217337	-0.590939	0.0739107	-0.027996	-0.707322	0.00970669	0.000779975	-0.310988	-0.222901	0.270853	0.0979734	-0.118934	0.631711	-0.492322	-0.246172	-0.598438	-0.0867887	0.113514	0.0308857	0.424555	-0.416982	0.498369	0.0650975	-0.224771	0.251093	0.679497	0.113855	0.304643	-0.0672484	-0.397062	-0.197974	-0.303045	0.206583	0.216872	0.026133	-0.393572	0.151606	-0.45432	0.156594	-0.515717	0.51981	0.213875	-0.255424
-4.72573	-0.736448	0.297561	-0.331987	-0.515186	0.577982	0.31327	-0.218804	-0.590478	0.071953	-0.0274521	-0.707321	0.0104298	0.000764193	-0.311151	-0.222495	0.269443	0.096285	-0.118399	0.633869	-0.493033	-0.246629	-0.598342	-0.0859024	0.115201	0.0324298	0.424231	-0.417662	0.498992	0.06678	-0.224414	0.250698	0.678412	0.116714	0.306494	-0.0668695	-0.396513	-0.197229	-0.303564	0.207163	0.216102	0.0261661	-0.394587	0.153128	-0.455501	0.154977	-0.514418	0.516974	0.213619	-0.255676
-4.72475	-0.735902	0.299204	-0.329577	-0.516397	0.577076	0.311575	-0.22026	-0.590014	0.0699985	-0.0268948	-0.707309	0.0111589	0.000752065	-0.311313	-0.222075	0.268043	0.0946047	-0.117862	0.636014	-0.493745	-0.247098	-0.598226	-0.0850137	0.116875	0.0339762	0.423911	-0.418342	0.499613	0.0684772	-0.224053	0.250297	0.677336	0.119569	0.308335	-0.0664806	-0.395954	-0.196506	-0.304095	0.207736	0.21532	0.0261812	-0.395589	0.154632	-0.456683	0.153352	-0.513116	0.514143	0.213362	-0.255935
-4.72377	-0.735349	0.300858	-0.327175	-0.517606	0.576156	0.309879	-0.221705	-0.589549	0.0680472	-0.0263238	-0.707286	0.011894	0.000743584	-0.311473	-0.221638	0.266653	0.0929328	-0.117324	0.638144	-0.494458	-0.247579	-0.598088	-0.0841227	0.118536	0.035525	0.423596	-0.41902	0.500233	0.070189	-0.223688	0.24989	0.676269	0.122421	0.310164	-0.0660817	-0.395385	-0.195804	-0.304637	0.208304	0.214525	0.0261781	-0.396578	0.15612	-0.457868	0.151722	-0.51181	0.511317	0.213107	-0.256201
-4.72278	-0.734789	0.302524	-0.324784	-0.518815	0.575223	0.308181	-0.223138	-0.589082	0.0660992	-0.025739	-0.707252	0.012635	0.000738741	-0.311633	-0.221186	0.265273	0.0912695	-0.116784	0.640261	-0.495173	-0.248071	-0.59793	-0.0832295	0.120185	0.0370761	0.423284	-0.419696	0.500851	0.0719155	-0.223319	0.249477	0.675213	0.125268	0.311983	-0.0656729	-0.394807	-0.195125	-0.30519	0.208864	0.213718	0.026157	-0.397555	0.157591	-0.459055	0.150085	-0.510501	0.508497	0.212852	-0.256473
-4.7218	-0.734223	0.304202	-0.322402	-0.520024	0.574277	0.306483	-0.22456	-0.588613	0.0641547	-0.0251403	-0.707207	0.0133819	0.000737528	-0.311792	-0.220719	0.263903	0.089615	-0.116242	0.642363	-0.495888	-0.248576	-0.59775	-0.0823341	0.121822	0.0386294	0.422978	-0.420371	0.501467	0.0736565	-0.222947	0.249059	0.674166	0.128112	0.313792	-0.0652542	-0.394219	-0.194468	-0.305753	0.209419	0.212898	0.026118	-0.398518	0.159044	-0.460244	0.148442	-0.50919	0.505682	0.212597	-0.256752
-4.72082	-0.733649	0.305891	-0.32003	-0.521232	0.573318	0.304783	-0.22597	-0.588142	0.0622135	-0.0245273	-0.707151	0.0141345	0.000739933	-0.31195	-0.220237	0.262544	0.0879695	-0.115698	0.644451	-0.496604	-0.249091	-0.59755	-0.0814364	0.123445	0.0401849	0.422676	-0.421045	0.50208	0.0754119	-0.222571	0.248634	0.67313	0.130952	0.315589	-0.0648255	-0.393622	-0.193832	-0.306328	0.209966	0.212066	0.026061	-0.39947	0.16048	-0.461434	0.146793	-0.507875	0.502872	0.212342	-0.257038
-4.71983	-0.733069	0.307592	-0.317668	-0.522439	0.572346	0.303083	-0.227369	-0.587669	0.060276	-0.0239	-0.707084	0.0148929	0.000745944	-0.312108	-0.219739	0.261195	0.0863333	-0.115153	0.646524	-0.497321	-0.249619	-0.597328	-0.0805366	0.125055	0.0417426	0.422378	-0.421717	0.502692	0.0771818	-0.222191	0.248205	0.672104	0.133787	0.317376	-0.064387	-0.393014	-0.193219	-0.306914	0.210507	0.211222	0.0259863	-0.400408	0.161898	-0.462627	0.145138	-0.506558	0.500069	0.212088	-0.25733
-4.71885	-0.732483	0.309303	-0.315316	-0.523646	0.571361	0.301381	-0.228754	-0.587195	0.058342	-0.0232581	-0.707006	0.015657	0.000755548	-0.312264	-0.219226	0.259857	0.0847066	-0.114606	0.648582	-0.498039	-0.250158	-0.597085	-0.0796346	0.126653	0.0433024	0.422085	-0.422387	0.503301	0.078966	-0.221808	0.24777	0.671089	0.136618	0.319152	-0.0639386	-0.392397	-0.192628	-0.30751	0.211041	0.210365	0.0258938	-0.401333	0.163299	-0.463821	0.143478	-0.505237	0.497271	0.211834	-0.257628
-4.71787	-0.731889	0.311026	-0.312975	-0.524852	0.570364	0.299679	-0.230127	-0.586719	0.0564118	-0.0226015	-0.706918	0.0164267	0.00076873	-0.31242	-0.218698	0.258529	0.0830895	-0.114056	0.650625	-0.498757	-0.250709	-0.59682	-0.0787305	0.128237	0.0448644	0.421798	-0.423055	0.503907	0.0807644	-0.221421	0.247329	0.670085	0.139444	0.320917	-0.0634804	-0.391771	-0.192059	-0.308117	0.211568	0.209496	0.0257837	-0.402246	0.164682	-0.465016	0.141813	-0.503915	0.49448	0.21158	-0.257933
-4.71688	-0.73129	0.312759	-0.310645	-0.526058	0.569353	0.297975	-0.231488	-0.586242	0.0544854	-0.0219299	-0.706819	0.017202	0.000785475	-0.312576	-0.218155	0.257212	0.0814824	-0.113505	0.652654	-0.499477	-0.251271	-0.596535	-0.0778243	0.129807	0.0464284	0.421515	-0.42372	0.50451	0.0825771	-0.22103	0.246883	0.669092	0.142265	0.322672	-0.0630125	-0.391135	-0.191512	-0.308734	0.212088	0.208616	0.025656	-0.403146	0.166048	-0.466213	0.140143	-0.502589	0.491695	0.211326	-0.258245
-4.7159	-0.730684	0.314503	-0.308326	-0.527263	0.56833	0.296271	-0.232835	-0.585763	0.0525628	-0.0212432	-0.706709	0.0179828	0.000805766	-0.312731	-0.217597	0.255905	0.0798853	-0.112952	0.654667	-0.500198	-0.251845	-0.596228	-0.0769161	0.131365	0.0479944	0.421237	-0.424384	0.505111	0.0844038	-0.220636	0.246432	0.66811	0.145081	0.324415	-0.0625347	-0.39049	-0.190988	-0.309361	0.212601	0.207723	0.0255108	-0.404033	0.167396	-0.467411	0.138468	-0.501261	0.488917	0.211072	-0.258563
-4.71492	-0.730072	0.316258	-0.306018	-0.528467	0.567294	0.294565	-0.234169	-0.585282	0.0506442	-0.0205413	-0.706588	0.018769	0.000829585	-0.312886	-0.217024	0.254609	0.0782986	-0.112396	0.656664	-0.50092	-0.252431	-0.5959	-0.0760058	0.132908	0.0495624	0.420964	-0.425045	0.505708	0.0862446	-0.220238	0.245976	0.66714	0.147892	0.326148	-0.0620472	-0.389835	-0.190486	-0.309999	0.213106	0.206819	0.0253481	-0.404907	0.168727	-0.468611	0.136788	-0.499931	0.486146	0.210818	-0.258887
-4.71394	-0.729454	0.318023	-0.303721	-0.529671	0.566246	0.292859	-0.235489	-0.5848	0.0487296	-0.0198238	-0.706456	0.0195606	0.000856912	-0.31304	-0.216436	0.253324	0.0767224	-0.111839	0.658647	-0.501642	-0.253027	-0.595551	-0.0750935	0.134438	0.0511323	0.420696	-0.425703	0.506301	0.0880994	-0.219837	0.245514	0.666182	0.150698	0.32787	-0.06155	-0.389171	-0.190006	-0.310646	0.213605	0.205903	0.0251681	-0.405769	0.170039	-0.469812	0.135105	-0.498598	0.483382	0.210564	-0.259218
-4.71295	-0.72883	0.319798	-0.301435	-0.530874	0.565185	0.291152	-0.236796	-0.584317	0.0468192	-0.0190907	-0.706314	0.0203576	0.000887726	-0.313194	-0.215833	0.25205	0.075157	-0.11128	0.660613	-0.502366	-0.253636	-0.59518	-0.0741792	0.135953	0.0527042	0.420434	-0.426359	0.506891	0.0899681	-0.219433	0.245048	0.665235	0.153498	0.329581	-0.0610431	-0.388498	-0.189548	-0.311303	0.214096	0.204976	0.0249708	-0.406618	0.171334	-0.471013	0.133417	-0.497263	0.480626	0.210309	-0.259556
-4.71197	-0.7282	0.321583	-0.299162	-0.532076	0.564112	0.289445	-0.238088	-0.583833	0.0449129	-0.0183418	-0.706161	0.0211598	0.000922006	-0.313348	-0.215216	0.250786	0.0736025	-0.110718	0.662564	-0.50309	-0.254255	-0.594787	-0.073263	0.137455	0.0542779	0.420177	-0.427011	0.507478	0.0918506	-0.219025	0.244577	0.6643	0.156292	0.331281	-0.0605266	-0.387816	-0.189112	-0.31197	0.214579	0.204037	0.0247564	-0.407453	0.172611	-0.472216	0.131725	-0.495927	0.477877	0.210055	-0.259899
-4.71099	-0.727564	0.323379	-0.2969	-0.533278	0.563027	0.287736	-0.239366	-0.583347	0.0430109	-0.0175769	-0.705998	0.0219672	0.000959728	-0.313501	-0.214583	0.249533	0.0720592	-0.110154	0.664499	-0.503816	-0.254886	-0.594374	-0.0723448	0.138943	0.0558534	0.419926	-0.427661	0.50806	0.0937468	-0.218613	0.2441	0.663378	0.159081	0.332971	-0.0600004	-0.387124	-0.188699	-0.312647	0.215055	0.203087	0.0245248	-0.408276	0.17387	-0.47342	0.130029	-0.494588	0.475136	0.2098	-0.260249
-4.71	-0.726922	0.325184	-0.294651	-0.534479	0.561929	0.286027	-0.24063	-0.582861	0.0411133	-0.0167957	-0.705824	0.0227797	0.00100087	-0.313655	-0.213936	0.248292	0.0705273	-0.109588	0.666418	-0.504542	-0.255528	-0.593939	-0.0714248	0.140416	0.0574307	0.419679	-0.428308	0.508638	0.0956567	-0.218199	0.243619	0.662468	0.161863	0.334649	-0.0594648	-0.386423	-0.188308	-0.313333	0.215523	0.202126	0.0242763	-0.409086	0.175111	-0.474624	0.128331	-0.493247	0.472403	0.209545	-0.260606
-4.70902	-0.726274	0.326998	-0.292414	-0.535679	0.560819	0.284318	-0.241879	-0.582373	0.03922	-0.0159982	-0.705639	0.0235973	0.0010454	-0.313808	-0.213275	0.247061	0.0690069	-0.10902	0.66832	-0.505269	-0.256181	-0.593483	-0.0705029	0.141875	0.0590098	0.419439	-0.428951	0.509212	0.0975801	-0.217781	0.243134	0.661571	0.16464	0.336317	-0.0589195	-0.385714	-0.18794	-0.314029	0.215983	0.201153	0.0240108	-0.409884	0.176335	-0.475829	0.126628	-0.491904	0.469679	0.20929	-0.260968
-4.70804	-0.725621	0.328822	-0.290189	-0.536879	0.559697	0.282608	-0.243112	-0.581884	0.0373313	-0.0151842	-0.705444	0.0244198	0.00109331	-0.313961	-0.212599	0.245841	0.0674984	-0.108449	0.670207	-0.505997	-0.256846	-0.593005	-0.0695791	0.143319	0.0605905	0.419204	-0.429591	0.509782	0.099517	-0.21736	0.242643	0.660687	0.167409	0.337973	-0.0583649	-0.384995	-0.187594	-0.314733	0.216436	0.20017	0.0237285	-0.410668	0.17754	-0.477034	0.124923	-0.490559	0.466962	0.209034	-0.261337
-4.70705	-0.724962	0.330655	-0.287977	-0.538078	0.558563	0.280897	-0.244331	-0.581395	0.0354472	-0.0143535	-0.705239	0.0252473	0.00114455	-0.314115	-0.211908	0.244632	0.0660018	-0.107877	0.672076	-0.506725	-0.257521	-0.592506	-0.0686536	0.144749	0.0621729	0.418975	-0.430228	0.510347	0.101467	-0.216936	0.242149	0.659815	0.170172	0.339619	-0.0578007	-0.384267	-0.18727	-0.315447	0.21688	0.199176	0.0234295	-0.411439	0.178727	-0.47824	0.123215	-0.489213	0.464255	0.208777	-0.261713
-4.70607	-0.724298	0.332498	-0.285778	-0.539276	0.557418	0.279185	-0.245534	-0.580904	0.0335678	-0.0135058	-0.705023	0.0260796	0.0011991	-0.314269	-0.211204	0.243435	0.0645175	-0.107301	0.67393	-0.507455	-0.258208	-0.591985	-0.0677263	0.146164	0.0637569	0.418752	-0.430861	0.510907	0.103431	-0.216509	0.241649	0.658957	0.172929	0.341253	-0.0572272	-0.383531	-0.186969	-0.316169	0.217317	0.198172	0.0231139	-0.412198	0.179896	-0.479447	0.121505	-0.487865	0.461556	0.20852	-0.262094
-4.70509	-0.723629	0.334349	-0.283591	-0.540473	0.55626	0.277473	-0.246721	-0.580413	0.0316931	-0.0126411	-0.704797	0.0269168	0.00125693	-0.314422	-0.210485	0.242248	0.0630455	-0.106724	0.675766	-0.508185	-0.258905	-0.591443	-0.0667972	0.147564	0.0653424	0.418534	-0.43149	0.511462	0.105408	-0.216078	0.241146	0.658112	0.175678	0.342877	-0.0566443	-0.382786	-0.18669	-0.316901	0.217745	0.197156	0.0227817	-0.412944	0.181046	-0.480653	0.119792	-0.486516	0.458866	0.208262	-0.262482
-4.7041	-0.722954	0.336209	-0.281418	-0.54167	0.555091	0.275761	-0.247892	-0.579921	0.0298232	-0.0117592	-0.70456	0.0277586	0.00131801	-0.314577	-0.209752	0.241072	0.0615861	-0.106143	0.677586	-0.508917	-0.259614	-0.59088	-0.0658665	0.148949	0.0669295	0.418323	-0.432115	0.512012	0.107398	-0.215645	0.240638	0.657281	0.178421	0.34449	-0.0560521	-0.382032	-0.186433	-0.317641	0.218165	0.196131	0.0224331	-0.413677	0.182179	-0.48186	0.118077	-0.485165	0.456186	0.208004	-0.262876
-4.70312	-0.722273	0.338078	-0.279259	-0.542866	0.55391	0.274048	-0.249047	-0.579428	0.0279582	-0.0108599	-0.704313	0.0286051	0.00138231	-0.314731	-0.209005	0.239908	0.0601396	-0.105561	0.679389	-0.509649	-0.260333	-0.590295	-0.064934	0.150319	0.0685181	0.418117	-0.432737	0.512557	0.109401	-0.215209	0.240125	0.656463	0.181156	0.346092	-0.0554506	-0.381269	-0.186199	-0.318389	0.218577	0.195095	0.0220682	-0.414397	0.183293	-0.483067	0.11636	-0.483813	0.453515	0.207745	-0.263276
-4.70214	-0.721588	0.339955	-0.277113	-0.544061	0.552717	0.272335	-0.250186	-0.578935	0.0260982	-0.00994303	-0.704056	0.0294561	0.00144979	-0.314886	-0.208244	0.238755	0.058706	-0.104976	0.681174	-0.510382	-0.261063	-0.589689	-0.0639999	0.151674	0.070108	0.417918	-0.433354	0.513096	0.111417	-0.214769	0.239609	0.655659	0.183883	0.347682	-0.0548399	-0.380498	-0.185987	-0.319146	0.21898	0.194049	0.021687	-0.415104	0.18439	-0.484274	0.114641	-0.48246	0.450853	0.207485	-0.263682
-4.70116	-0.720898	0.341841	-0.274981	-0.545256	0.551513	0.270621	-0.251308	-0.578441	0.0242433	-0.00900843	-0.703789	0.0303116	0.00152042	-0.315041	-0.207469	0.237613	0.0572856	-0.104388	0.682943	-0.511115	-0.261804	-0.589061	-0.0630642	0.153013	0.0716994	0.417724	-0.433967	0.513629	0.113445	-0.214327	0.239089	0.654869	0.186604	0.349262	-0.0542201	-0.379718	-0.185797	-0.319911	0.219374	0.192993	0.0212897	-0.415799	0.185467	-0.48548	0.112921	-0.481105	0.448202	0.207225	-0.264094
-4.70017	-0.720202	0.343734	-0.272863	-0.546449	0.550298	0.268907	-0.252413	-0.577947	0.0223936	-0.00805593	-0.703512	0.0311716	0.00159416	-0.315197	-0.20668	0.236482	0.0558786	-0.103798	0.684694	-0.51185	-0.262556	-0.588412	-0.0621268	0.154337	0.0732921	0.417537	-0.434576	0.514157	0.115487	-0.213881	0.238564	0.654093	0.189316	0.350831	-0.0535911	-0.37893	-0.18563	-0.320684	0.21976	0.191927	0.0208764	-0.416481	0.186527	-0.486687	0.111199	-0.47975	0.445561	0.206963	-0.264512
-4.69919	-0.719502	0.345636	-0.270759	-0.547642	0.549072	0.267193	-0.253501	-0.577453	0.020549	-0.00708539	-0.703224	0.0320359	0.00167099	-0.315353	-0.205877	0.235362	0.0544852	-0.103205	0.686428	-0.512585	-0.263318	-0.587742	-0.0611879	0.155646	0.0748861	0.417356	-0.43518	0.514679	0.117541	-0.213433	0.238036	0.653331	0.19202	0.352388	-0.0529531	-0.378134	-0.185485	-0.321465	0.220138	0.190851	0.0204472	-0.417149	0.187568	-0.487892	0.109476	-0.478393	0.44293	0.206701	-0.264936
-4.69821	-0.718797	0.347545	-0.268669	-0.548834	0.547834	0.265478	-0.254571	-0.576958	0.0187098	-0.00609663	-0.702927	0.0329044	0.00175085	-0.31551	-0.205061	0.234253	0.0531056	-0.102609	0.688144	-0.513321	-0.264091	-0.587051	-0.0602475	0.156939	0.0764813	0.417182	-0.43578	0.515194	0.119608	-0.212982	0.237504	0.652583	0.194716	0.353935	-0.052306	-0.377329	-0.185363	-0.322254	0.220506	0.189766	0.0200022	-0.417805	0.188591	-0.489098	0.107753	-0.477036	0.440309	0.206437	-0.265366
-4.69722	-0.718087	0.349462	-0.266594	-0.550025	0.546585	0.263763	-0.255624	-0.576463	0.0168759	-0.0050895	-0.702619	0.0337771	0.00183372	-0.315668	-0.204232	0.233156	0.0517399	-0.102011	0.689843	-0.514058	-0.264874	-0.586339	-0.0593055	0.158216	0.0780777	0.417014	-0.436375	0.515703	0.121687	-0.212528	0.236968	0.65185	0.197404	0.35547	-0.05165	-0.376517	-0.185262	-0.32305	0.220866	0.188671	0.0195415	-0.418449	0.189596	-0.490303	0.106028	-0.475678	0.437699	0.206173	-0.265802
-4.69624	-0.717372	0.351387	-0.264533	-0.551216	0.545326	0.262048	-0.25666	-0.575968	0.0150475	-0.00406383	-0.702302	0.034654	0.00191954	-0.315826	-0.203389	0.23207	0.0503884	-0.101409	0.691523	-0.514795	-0.265668	-0.585605	-0.0583621	0.159477	0.0796753	0.416852	-0.436965	0.516206	0.123778	-0.212071	0.236429	0.651132	0.200083	0.356995	-0.0509851	-0.375696	-0.185184	-0.323854	0.221216	0.187567	0.0190652	-0.419079	0.190582	-0.491507	0.104303	-0.474319	0.4351	0.205907	-0.266245
-4.69526	-0.716653	0.353319	-0.262488	-0.552405	0.544055	0.260333	-0.257677	-0.575473	0.0132246	-0.00301948	-0.701974	0.0355348	0.00200829	-0.315985	-0.202533	0.230996	0.0490512	-0.100805	0.693186	-0.515534	-0.266473	-0.58485	-0.0574172	0.160722	0.081274	0.416697	-0.437551	0.516702	0.125882	-0.211612	0.235886	0.650429	0.202754	0.358508	-0.0503114	-0.374867	-0.185128	-0.324665	0.221558	0.186454	0.0185734	-0.419697	0.19155	-0.49271	0.102578	-0.472959	0.432513	0.20564	-0.266692
-4.69427	-0.715929	0.355258	-0.260457	-0.553594	0.542774	0.258617	-0.258676	-0.574977	0.0114073	-0.00195629	-0.701637	0.0364196	0.00209992	-0.316145	-0.201663	0.229932	0.0477285	-0.100199	0.694831	-0.516273	-0.267287	-0.584074	-0.0564709	0.161951	0.0828737	0.416548	-0.438131	0.517191	0.127998	-0.21115	0.23534	0.64974	0.205416	0.36001	-0.0496289	-0.37403	-0.185094	-0.325483	0.22189	0.185332	0.0180663	-0.420302	0.192499	-0.493912	0.100853	-0.4716	0.429936	0.205372	-0.267146
-4.69329	-0.715201	0.357204	-0.258442	-0.554781	0.541482	0.256902	-0.259657	-0.574482	0.00959577	-0.000874105	-0.70129	0.0373083	0.00219438	-0.316306	-0.200781	0.22888	0.0464205	-0.0995889	0.696458	-0.517012	-0.268112	-0.583277	-0.0555233	0.163164	0.0844745	0.416406	-0.438706	0.517673	0.130126	-0.210685	0.23479	0.649067	0.208069	0.361501	-0.0489376	-0.373186	-0.185083	-0.326308	0.222213	0.184201	0.017544	-0.420894	0.19343	-0.495114	0.099128	-0.470239	0.427371	0.205103	-0.267606
-4.69231	-0.714468	0.359157	-0.256441	-0.555968	0.540179	0.255186	-0.26062	-0.573987	0.00778997	0.000227225	-0.700933	0.0382007	0.00229164	-0.316467	-0.199885	0.227839	0.0451274	-0.0989762	0.698067	-0.517753	-0.268947	-0.582458	-0.0545742	0.164361	0.0860762	0.416271	-0.439276	0.518148	0.132266	-0.210218	0.234237	0.648408	0.210712	0.362981	-0.0482377	-0.372333	-0.185093	-0.327139	0.222527	0.183061	0.0170065	-0.421474	0.194343	-0.496314	0.0974032	-0.468879	0.424818	0.204833	-0.268071
-4.69133	-0.713732	0.361116	-0.254457	-0.557154	0.538866	0.25347	-0.261563	-0.573492	0.00599002	0.00134785	-0.700566	0.0390968	0.00239165	-0.31663	-0.198977	0.22681	0.0438494	-0.0983605	0.699658	-0.518494	-0.269792	-0.581619	-0.0536238	0.165541	0.0876788	0.416143	-0.439841	0.518616	0.134417	-0.209748	0.233681	0.647765	0.213347	0.36445	-0.0475292	-0.371474	-0.185126	-0.327978	0.222831	0.181913	0.0164541	-0.422041	0.195237	-0.497513	0.095679	-0.467518	0.422276	0.204561	-0.268542
-4.69034	-0.712991	0.363082	-0.252488	-0.558339	0.537543	0.251754	-0.262488	-0.572998	0.00419599	0.00248791	-0.70019	0.0399966	0.00249436	-0.316794	-0.198056	0.225791	0.0425867	-0.0977419	0.70123	-0.519235	-0.270647	-0.580759	-0.0526722	0.166705	0.0892823	0.416021	-0.4404	0.519076	0.13658	-0.209275	0.233121	0.647138	0.215972	0.365907	-0.0468121	-0.370606	-0.185181	-0.328823	0.223126	0.180756	0.0158868	-0.422595	0.196113	-0.49871	0.0939555	-0.466157	0.419747	0.204288	-0.269019
-4.68936	-0.712245	0.365055	-0.250535	-0.559523	0.536209	0.250038	-0.263393	-0.572504	0.00240796	0.00364756	-0.699805	0.0408999	0.00259973	-0.316959	-0.197122	0.224784	0.0413393	-0.0971202	0.702784	-0.519978	-0.271512	-0.579878	-0.0517192	0.167852	0.0908866	0.415906	-0.440954	0.519528	0.138755	-0.2088	0.232559	0.646526	0.218587	0.367354	-0.0460866	-0.369731	-0.185257	-0.329674	0.223411	0.179591	0.0153047	-0.423137	0.19697	-0.499906	0.092233	-0.464796	0.417229	0.204014	-0.269502
-4.68838	-0.711496	0.367033	-0.248598	-0.560706	0.534865	0.248322	-0.264279	-0.57201	0.000626016	0.00482694	-0.699409	0.0418066	0.00270771	-0.317125	-0.196176	0.223788	0.0401076	-0.0964953	0.704319	-0.520721	-0.272387	-0.578976	-0.0507651	0.168983	0.0924916	0.415798	-0.441502	0.519973	0.140941	-0.208322	0.231994	0.645929	0.221192	0.368789	-0.0453526	-0.368849	-0.185356	-0.330531	0.223686	0.178417	0.014708	-0.423666	0.197809	-0.501101	0.0905115	-0.463435	0.414725	0.203738	-0.26999
-4.68739	-0.710743	0.369017	-0.246677	-0.561888	0.533512	0.246606	-0.265146	-0.571517	-0.00114978	0.00602619	-0.699005	0.0427167	0.00281824	-0.317292	-0.195217	0.222804	0.0388916	-0.0958674	0.705836	-0.521464	-0.273271	-0.578054	-0.0498097	0.170097	0.0940974	0.415697	-0.442045	0.520409	0.143139	-0.207842	0.231426	0.645348	0.223788	0.370213	-0.0446103	-0.36796	-0.185476	-0.331394	0.223951	0.177236	0.0140969	-0.424182	0.198629	-0.502294	0.0887914	-0.462074	0.412233	0.20346	-0.270483
-4.68641	-0.709986	0.371008	-0.244772	-0.563069	0.532148	0.24489	-0.265993	-0.571024	-0.00291934	0.00724544	-0.698591	0.04363	0.0029313	-0.31746	-0.194246	0.221831	0.0376916	-0.0952362	0.707334	-0.522209	-0.274166	-0.577111	-0.0488531	0.171194	0.0957038	0.415603	-0.442581	0.520838	0.145347	-0.20736	0.230855	0.644783	0.226373	0.371626	-0.0438597	-0.367063	-0.185619	-0.332263	0.224207	0.176047	0.0134713	-0.424686	0.199431	-0.503485	0.0870728	-0.460713	0.409753	0.203181	-0.270983
-4.68543	-0.709225	0.373003	-0.242884	-0.564249	0.530774	0.243174	-0.26682	-0.570532	-0.00468259	0.00848485	-0.698167	0.0445465	0.00304681	-0.31763	-0.193263	0.220869	0.0365077	-0.0946018	0.708813	-0.522954	-0.27507	-0.576147	-0.0478954	0.172274	0.0973108	0.415516	-0.443112	0.521258	0.147567	-0.206875	0.230281	0.644234	0.228948	0.373027	-0.043101	-0.366159	-0.185783	-0.333138	0.224452	0.174851	0.0128315	-0.425178	0.200215	-0.504674	0.085356	-0.459353	0.407287	0.202901	-0.271488
-4.68444	-0.70846	0.375005	-0.241013	-0.565428	0.529391	0.241458	-0.267626	-0.570041	-0.00643946	0.00974453	-0.697734	0.0454661	0.00316473	-0.317801	-0.192268	0.219918	0.0353401	-0.0939642	0.710273	-0.523699	-0.275983	-0.575162	-0.0469365	0.173337	0.0989184	0.415436	-0.443637	0.52167	0.149798	-0.206388	0.229705	0.643701	0.231513	0.374418	-0.042334	-0.365249	-0.185969	-0.334018	0.224688	0.173647	0.0121776	-0.425656	0.20098	-0.505861	0.083641	-0.457993	0.404834	0.202619	-0.271998
-4.68346	-0.707692	0.377011	-0.239158	-0.566606	0.527998	0.239742	-0.268413	-0.569551	-0.00818986	0.0110246	-0.697292	0.0463887	0.00328501	-0.317973	-0.191261	0.218978	0.0341889	-0.0933232	0.711715	-0.524445	-0.276906	-0.574158	-0.0459766	0.174383	0.100526	0.415364	-0.444156	0.522073	0.152039	-0.205898	0.229126	0.643185	0.234066	0.375797	-0.041559	-0.364331	-0.186177	-0.334903	0.224913	0.172435	0.0115098	-0.426123	0.201726	-0.507046	0.0819281	-0.456633	0.402395	0.202335	-0.272513
-4.68248	-0.70692	0.379023	-0.237321	-0.567783	0.526596	0.238026	-0.269179	-0.569061	-0.00993373	0.0123253	-0.696841	0.0473143	0.0034076	-0.318146	-0.190242	0.21805	0.0330543	-0.0926789	0.713137	-0.525192	-0.277839	-0.573132	-0.0450156	0.175412	0.102135	0.415298	-0.444668	0.522468	0.154292	-0.205406	0.228545	0.642684	0.236609	0.377165	-0.040776	-0.363407	-0.186406	-0.335794	0.225128	0.171217	0.0108281	-0.426577	0.202454	-0.508229	0.0802175	-0.455275	0.399969	0.202049	-0.273034
-4.6815	-0.706144	0.381039	-0.2355	-0.568959	0.525184	0.23631	-0.269924	-0.568573	-0.011671	0.0136466	-0.696381	0.0482426	0.00353245	-0.318322	-0.189212	0.217133	0.0319365	-0.0920312	0.714541	-0.525939	-0.27878	-0.572087	-0.0440536	0.176424	0.103744	0.41524	-0.445175	0.522853	0.156555	-0.204912	0.227962	0.642199	0.239141	0.378521	-0.0399851	-0.362476	-0.186657	-0.336689	0.225333	0.169991	0.0101326	-0.427018	0.203164	-0.509409	0.0785094	-0.453916	0.397556	0.201762	-0.273561
-4.68051	-0.705365	0.383061	-0.233697	-0.570134	0.523763	0.234595	-0.270648	-0.568086	-0.0134016	0.0149887	-0.695911	0.0491737	0.00365949	-0.318498	-0.18817	0.216226	0.0308357	-0.0913801	0.715925	-0.526687	-0.279731	-0.571021	-0.0430906	0.177418	0.105353	0.415189	-0.445675	0.52323	0.158828	-0.204416	0.227376	0.641731	0.241662	0.379867	-0.0391863	-0.361539	-0.186929	-0.33759	0.225527	0.168759	0.00942366	-0.427447	0.203856	-0.510587	0.0768039	-0.452559	0.395158	0.201473	-0.274093
-4.67953	-0.704583	0.385087	-0.231911	-0.571307	0.522333	0.23288	-0.271352	-0.567599	-0.0151254	0.0163517	-0.695433	0.0501074	0.00378867	-0.318676	-0.187117	0.215331	0.0297519	-0.0907254	0.71729	-0.527435	-0.280691	-0.569935	-0.0421266	0.178395	0.106963	0.415145	-0.446168	0.523597	0.161111	-0.203917	0.226788	0.64128	0.244172	0.3812	-0.0383797	-0.360595	-0.187223	-0.338494	0.225711	0.16752	0.00870123	-0.427864	0.204529	-0.511762	0.0751012	-0.451202	0.392774	0.201182	-0.27463
-4.67855	-0.703797	0.387117	-0.230142	-0.57248	0.520894	0.231165	-0.272034	-0.567114	-0.0168423	0.0177358	-0.694946	0.0510436	0.00391995	-0.318856	-0.186052	0.214448	0.0286854	-0.0900673	0.718636	-0.528184	-0.28166	-0.568829	-0.0411616	0.179354	0.108573	0.415108	-0.446655	0.523955	0.163405	-0.203416	0.226199	0.640844	0.24667	0.382523	-0.0375655	-0.359645	-0.187538	-0.339404	0.225884	0.166275	0.00796551	-0.428268	0.205183	-0.512935	0.0734016	-0.449847	0.390404	0.200889	-0.275172
-4.67756	-0.703008	0.389152	-0.228392	-0.573651	0.519446	0.22945	-0.272695	-0.566631	-0.0185524	0.0191411	-0.69445	0.0519823	0.00405326	-0.319037	-0.184977	0.213575	0.0276363	-0.0894056	0.719962	-0.528933	-0.282638	-0.567703	-0.0401958	0.180296	0.110183	0.415079	-0.447136	0.524304	0.165709	-0.202913	0.225607	0.640426	0.249157	0.383834	-0.0367436	-0.358689	-0.187874	-0.340317	0.226046	0.165023	0.00721664	-0.42866	0.20582	-0.514104	0.0717052	-0.448492	0.388049	0.200594	-0.275719
-4.67658	-0.702216	0.39119	-0.226659	-0.574821	0.517989	0.227735	-0.273335	-0.566148	-0.0202555	0.0205676	-0.693945	0.0529233	0.00418854	-0.31922	-0.18389	0.212713	0.0266048	-0.0887403	0.721269	-0.529683	-0.283624	-0.566557	-0.039229	0.18122	0.111793	0.415058	-0.44761	0.524642	0.168023	-0.202408	0.225013	0.640024	0.251631	0.385134	-0.0359141	-0.357726	-0.188232	-0.341234	0.226198	0.163765	0.00645475	-0.42904	0.206438	-0.515271	0.0700122	-0.447139	0.385708	0.200297	-0.276272
-4.6756	-0.701421	0.393233	-0.224944	-0.57599	0.516524	0.226021	-0.273953	-0.565667	-0.0219515	0.0220155	-0.693431	0.0538666	0.00432573	-0.319404	-0.182793	0.211862	0.025591	-0.0880714	0.722557	-0.530433	-0.28462	-0.565392	-0.0382615	0.182127	0.113403	0.415043	-0.448077	0.524972	0.170346	-0.201901	0.224418	0.639638	0.254094	0.386423	-0.0350772	-0.356758	-0.18861	-0.342156	0.226338	0.162501	0.00567999	-0.429407	0.207038	-0.516435	0.0683227	-0.445786	0.383382	0.199998	-0.276829
-4.67461	-0.700623	0.395279	-0.223247	-0.577158	0.51505	0.224307	-0.274549	-0.565188	-0.0236403	0.023485	-0.692909	0.0548121	0.00446479	-0.319591	-0.181685	0.211022	0.024595	-0.0873988	0.723825	-0.531184	-0.285624	-0.564207	-0.037293	0.183015	0.115014	0.415037	-0.448538	0.525291	0.172679	-0.201392	0.223821	0.63927	0.256545	0.3877	-0.0342329	-0.355784	-0.18901	-0.343081	0.226468	0.161231	0.0048925	-0.429763	0.207619	-0.517596	0.0666369	-0.444435	0.381072	0.199698	-0.277392
-4.67363	-0.699822	0.397329	-0.221569	-0.578324	0.513567	0.222593	-0.275123	-0.56471	-0.025322	0.024976	-0.692378	0.0557596	0.00460564	-0.319779	-0.180566	0.210194	0.0236171	-0.0867225	0.725074	-0.531935	-0.286636	-0.563002	-0.0363238	0.183886	0.116624	0.415037	-0.448991	0.5256	0.175022	-0.200881	0.223222	0.638918	0.258983	0.388966	-0.0333813	-0.354804	-0.189431	-0.344009	0.226587	0.159956	0.00409243	-0.430106	0.208182	-0.518753	0.0649551	-0.443086	0.378776	0.199395	-0.277959
-4.67265	-0.699018	0.399382	-0.219909	-0.579489	0.512077	0.22088	-0.275675	-0.564234	-0.0269964	0.0264888	-0.691838	0.0567091	0.00474823	-0.319968	-0.179437	0.209376	0.0226573	-0.0860424	0.726303	-0.532686	-0.287657	-0.561778	-0.0353539	0.184739	0.118234	0.415046	-0.449438	0.525899	0.177374	-0.200368	0.222622	0.638583	0.261409	0.39022	-0.0325224	-0.353819	-0.189872	-0.344941	0.226694	0.158675	0.00327993	-0.430437	0.208727	-0.519907	0.0632774	-0.441738	0.376496	0.19909	-0.278532
-4.67166	-0.698211	0.401438	-0.218267	-0.580653	0.510578	0.219167	-0.276204	-0.56376	-0.0286634	0.0280234	-0.69129	0.0576604	0.0048925	-0.32016	-0.178298	0.208568	0.0217158	-0.0853585	0.727513	-0.533438	-0.288687	-0.560534	-0.0343832	0.185574	0.119844	0.415061	-0.449877	0.526187	0.179735	-0.199853	0.22202	0.638265	0.263823	0.391463	-0.0316564	-0.352828	-0.190334	-0.345876	0.226791	0.157389	0.00245513	-0.430756	0.209254	-0.521058	0.0616039	-0.440391	0.374232	0.198783	-0.279109
-4.67068	-0.697401	0.403498	-0.216644	-0.581816	0.509071	0.217454	-0.276712	-0.563287	-0.030323	0.0295799	-0.690734	0.0586135	0.00503839	-0.320353	-0.177149	0.207772	0.0207927	-0.0846707	0.728703	-0.534191	-0.289724	-0.559271	-0.0334117	0.186391	0.121454	0.415085	-0.45031	0.526465	0.182105	-0.199336	0.221417	0.637964	0.266224	0.392695	-0.0307833	-0.351832	-0.190817	-0.346814	0.226876	0.156097	0.0016182	-0.431063	0.209763	-0.522204	0.0599348	-0.439046	0.371983	0.198474	-0.279692
-4.6697	-0.696589	0.40556	-0.21504	-0.582977	0.507556	0.215742	-0.277196	-0.562817	-0.0319752	0.0311585	-0.690169	0.0595683	0.00518583	-0.320549	-0.175989	0.206987	0.0198882	-0.0839791	0.729873	-0.534943	-0.29077	-0.557989	-0.0324396	0.18719	0.123064	0.415116	-0.450736	0.526733	0.184484	-0.198817	0.220813	0.63768	0.268612	0.393915	-0.0299033	-0.35083	-0.191321	-0.347755	0.22695	0.154801	0.000769285	-0.431358	0.210253	-0.523348	0.0582703	-0.437703	0.36975	0.198162	-0.280279
-4.66872	-0.695774	0.407625	-0.213455	-0.584137	0.506034	0.21403	-0.277658	-0.562348	-0.0336197	0.0327592	-0.689597	0.0605246	0.00533477	-0.320746	-0.17482	0.206212	0.0190024	-0.0832836	0.731023	-0.535697	-0.291824	-0.556688	-0.0314669	0.187971	0.124673	0.415154	-0.451154	0.526989	0.186872	-0.198297	0.220208	0.637413	0.270987	0.395124	-0.0290163	-0.349824	-0.191845	-0.348699	0.227012	0.1535	-9.14714e-05	-0.431642	0.210726	-0.524487	0.0566106	-0.436361	0.367533	0.197849	-0.28087
-4.66773	-0.694956	0.409692	-0.211888	-0.585295	0.504504	0.212319	-0.278098	-0.561881	-0.0352566	0.0343821	-0.689015	0.0614824	0.00548513	-0.320945	-0.173642	0.205448	0.0181354	-0.0825841	0.732154	-0.53645	-0.292886	-0.555369	-0.0304936	0.188733	0.126282	0.4152	-0.451565	0.527235	0.189269	-0.197774	0.219601	0.637162	0.273349	0.396321	-0.0281226	-0.348812	-0.192389	-0.349644	0.227063	0.152194	-0.000963913	-0.431913	0.21118	-0.525622	0.0549557	-0.435022	0.365332	0.197533	-0.281467
-4.66675	-0.694136	0.411762	-0.210341	-0.586452	0.502966	0.210608	-0.278514	-0.561417	-0.0368858	0.0360274	-0.688426	0.0624415	0.00563686	-0.321146	-0.172454	0.204694	0.0172874	-0.0818805	0.733265	-0.537204	-0.293955	-0.55403	-0.0295196	0.189477	0.127891	0.415254	-0.451969	0.52747	0.191674	-0.19725	0.218994	0.636929	0.275697	0.397507	-0.0272221	-0.347795	-0.192954	-0.350592	0.227102	0.150884	-0.00184789	-0.432172	0.211617	-0.526754	0.053306	-0.433684	0.363148	0.197215	-0.282068
-4.66577	-0.693314	0.413833	-0.208813	-0.587608	0.501421	0.208897	-0.278907	-0.560955	-0.0385072	0.037695	-0.687829	0.0634019	0.00578989	-0.321349	-0.171256	0.203951	0.0164585	-0.081173	0.734356	-0.537958	-0.295032	-0.552673	-0.0285451	0.190203	0.129499	0.415316	-0.452366	0.527694	0.194087	-0.196724	0.218386	0.636713	0.278032	0.398681	-0.026315	-0.346774	-0.193539	-0.351542	0.227129	0.14957	-0.00274323	-0.43242	0.212035	-0.527881	0.0516615	-0.432349	0.360981	0.196894	-0.282674
-4.66478	-0.692489	0.415907	-0.207305	-0.588762	0.499868	0.207187	-0.279277	-0.560495	-0.0401207	0.0393851	-0.687224	0.0643635	0.00594415	-0.321553	-0.170049	0.203219	0.0156489	-0.0804614	0.735427	-0.538712	-0.296117	-0.551298	-0.0275701	0.190911	0.131107	0.415385	-0.452755	0.527906	0.196508	-0.196196	0.217777	0.636514	0.280354	0.399843	-0.0254013	-0.345749	-0.194144	-0.352494	0.227145	0.148251	-0.00364981	-0.432656	0.212436	-0.529004	0.0500223	-0.431016	0.35883	0.196571	-0.283284
-4.6638	-0.691662	0.417982	-0.205816	-0.589915	0.498309	0.205477	-0.279624	-0.560038	-0.0417264	0.0410978	-0.68661	0.0653261	0.00609959	-0.32176	-0.168834	0.202497	0.0148586	-0.0797456	0.736479	-0.539467	-0.297209	-0.549904	-0.0265945	0.1916	0.132714	0.415462	-0.453136	0.528107	0.198937	-0.195666	0.217167	0.636332	0.282662	0.400995	-0.0244812	-0.344718	-0.194769	-0.353448	0.227149	0.146929	-0.00456744	-0.43288	0.212818	-0.530122	0.0483887	-0.429685	0.356696	0.196246	-0.283899
-4.66282	-0.690833	0.420059	-0.204347	-0.591066	0.496743	0.203768	-0.279947	-0.559583	-0.043324	0.0428332	-0.685989	0.0662897	0.00625613	-0.321969	-0.167609	0.201786	0.0140878	-0.0790257	0.73751	-0.540222	-0.298309	-0.548491	-0.0256185	0.192271	0.134321	0.415547	-0.453511	0.528297	0.201375	-0.195135	0.216557	0.636167	0.284956	0.402134	-0.0235547	-0.343684	-0.195414	-0.354403	0.227141	0.145603	-0.00549598	-0.433092	0.213183	-0.531236	0.0467608	-0.428356	0.354579	0.195918	-0.284518
-4.66183	-0.690002	0.422138	-0.202897	-0.592216	0.495169	0.20206	-0.280246	-0.559131	-0.0449136	0.0445913	-0.685361	0.0672541	0.00641372	-0.32218	-0.166376	0.201085	0.0133365	-0.0783016	0.738522	-0.540977	-0.299416	-0.547061	-0.0246421	0.192923	0.135926	0.415639	-0.453877	0.528474	0.203819	-0.194602	0.215947	0.63602	0.287235	0.403262	-0.0226219	-0.342645	-0.196078	-0.35536	0.227121	0.144273	-0.00643528	-0.433293	0.21353	-0.532345	0.0451388	-0.42703	0.35248	0.195588	-0.285142
-4.66085	-0.689169	0.424217	-0.201467	-0.593364	0.493589	0.200352	-0.280522	-0.558681	-0.046495	0.0463722	-0.684724	0.0682192	0.00657227	-0.322393	-0.165135	0.200394	0.012605	-0.0775732	0.739513	-0.541732	-0.30053	-0.545613	-0.0236652	0.193557	0.137532	0.41574	-0.454236	0.528641	0.206272	-0.194068	0.215336	0.635889	0.289501	0.404378	-0.0216829	-0.341602	-0.196762	-0.356317	0.227089	0.142941	-0.00738515	-0.433483	0.21386	-0.53345	0.0435227	-0.425706	0.350397	0.195256	-0.28577
-4.65987	-0.688333	0.426298	-0.200057	-0.59451	0.492003	0.198645	-0.280774	-0.558234	-0.0480683	0.0481759	-0.68408	0.069185	0.00673174	-0.322609	-0.163885	0.199713	0.0118933	-0.0768406	0.740485	-0.542488	-0.301651	-0.544147	-0.022688	0.194172	0.139136	0.415848	-0.454588	0.528795	0.208731	-0.193532	0.214724	0.635776	0.291752	0.405483	-0.0207378	-0.340555	-0.197466	-0.357276	0.227045	0.141604	-0.00834546	-0.43366	0.214171	-0.53455	0.0419128	-0.424384	0.348333	0.194921	-0.286402
-4.65889	-0.687496	0.42838	-0.198668	-0.595655	0.49041	0.196938	-0.281003	-0.55779	-0.0496332	0.0500026	-0.683428	0.0701513	0.00689204	-0.322826	-0.162627	0.199043	0.0112016	-0.0761037	0.741437	-0.543243	-0.302779	-0.542664	-0.0217104	0.194769	0.14074	0.415963	-0.454932	0.528937	0.211198	-0.192994	0.214113	0.635679	0.293989	0.406576	-0.0197867	-0.339505	-0.198189	-0.358235	0.226989	0.140265	-0.00931604	-0.433827	0.214465	-0.535645	0.0403091	-0.423066	0.346286	0.194583	-0.287039
-4.6579	-0.686657	0.430462	-0.197298	-0.596799	0.488811	0.195232	-0.281207	-0.557348	-0.0511899	0.0518523	-0.682769	0.071118	0.00705311	-0.323045	-0.161361	0.198383	0.0105299	-0.0753624	0.742368	-0.543999	-0.303914	-0.541162	-0.0207324	0.195347	0.142342	0.416087	-0.455268	0.529067	0.213672	-0.192455	0.213501	0.6356	0.296211	0.407658	-0.0188298	-0.33845	-0.198931	-0.359195	0.22692	0.138923	-0.0102967	-0.433982	0.214742	-0.536734	0.0387119	-0.42175	0.344257	0.194243	-0.287679
-4.65692	-0.685816	0.432544	-0.195949	-0.59794	0.487205	0.193526	-0.281387	-0.55691	-0.0527381	0.0537251	-0.682103	0.072085	0.00721489	-0.323267	-0.160087	0.197733	0.0098784	-0.0746167	0.74328	-0.544755	-0.305055	-0.539644	-0.0197542	0.195906	0.143944	0.416218	-0.455596	0.529185	0.216153	-0.191914	0.212889	0.635538	0.298419	0.408728	-0.0178669	-0.337393	-0.199692	-0.360155	0.22684	0.137579	-0.0112873	-0.434125	0.215001	-0.537819	0.0371213	-0.420437	0.342246	0.1939	-0.288324
-4.65594	-0.684973	0.434627	-0.194619	-0.59908	0.485594	0.191821	-0.281543	-0.556475	-0.0542779	0.0556211	-0.681429	0.0730522	0.0073773	-0.32349	-0.158805	0.197093	0.00924716	-0.0738667	0.744172	-0.545512	-0.306203	-0.538108	-0.0187757	0.196447	0.145545	0.416357	-0.455917	0.529291	0.21864	-0.191372	0.212278	0.635492	0.300612	0.409786	-0.0168984	-0.336331	-0.200473	-0.361115	0.226746	0.136232	-0.0122877	-0.434258	0.215242	-0.538898	0.0355373	-0.419127	0.340253	0.193555	-0.288973
-4.65495	-0.684129	0.436711	-0.193311	-0.600218	0.483976	0.190117	-0.281675	-0.556042	-0.0558091	0.0575402	-0.680748	0.0740195	0.00754027	-0.323716	-0.157516	0.196462	0.00863629	-0.0731121	0.745044	-0.546268	-0.307358	-0.536556	-0.017797	0.196969	0.147144	0.416504	-0.45623	0.529384	0.221134	-0.190828	0.211666	0.635464	0.302789	0.410832	-0.0159243	-0.335267	-0.201272	-0.362075	0.226641	0.134883	-0.0132977	-0.434379	0.215466	-0.539972	0.0339601	-0.417819	0.338278	0.193207	-0.289626
-4.65397	-0.683283	0.438794	-0.192023	-0.601355	0.482353	0.188413	-0.281782	-0.555613	-0.0573318	0.0594825	-0.68006	0.0749868	0.00770374	-0.323944	-0.15622	0.195842	0.00804589	-0.0723531	0.745896	-0.547024	-0.308519	-0.534986	-0.016818	0.197472	0.148743	0.416659	-0.456535	0.529465	0.223634	-0.190283	0.211055	0.635453	0.304952	0.411867	-0.0149446	-0.334199	-0.20209	-0.363035	0.226522	0.133531	-0.0143172	-0.434489	0.215673	-0.54104	0.03239	-0.416515	0.336322	0.192857	-0.290282
-4.65299	-0.682435	0.440877	-0.190755	-0.602489	0.480725	0.18671	-0.281864	-0.555188	-0.0588457	0.0614482	-0.679364	0.075954	0.00786764	-0.324174	-0.154916	0.195231	0.00747608	-0.0715895	0.746728	-0.547781	-0.309686	-0.5334	-0.0158389	0.197956	0.15034	0.416821	-0.456832	0.529533	0.226141	-0.189737	0.210444	0.635459	0.307099	0.41289	-0.0139594	-0.333129	-0.202927	-0.363995	0.226391	0.132178	-0.0153459	-0.434587	0.215863	-0.542103	0.0308269	-0.415214	0.334385	0.192504	-0.290943
-4.652	-0.681586	0.442959	-0.189509	-0.603622	0.47909	0.185008	-0.281923	-0.554765	-0.060351	0.0634372	-0.678662	0.0769209	0.0080319	-0.324406	-0.153606	0.19463	0.00692693	-0.0708214	0.74754	-0.548537	-0.310859	-0.531797	-0.0148596	0.198422	0.151937	0.416991	-0.457122	0.529588	0.228653	-0.189189	0.209834	0.635482	0.309231	0.413902	-0.012969	-0.332055	-0.203782	-0.364954	0.226248	0.130823	-0.0163837	-0.434675	0.216035	-0.54316	0.029271	-0.413916	0.332466	0.192148	-0.291607
-4.65102	-0.680736	0.445041	-0.188283	-0.604753	0.477451	0.183306	-0.281956	-0.554346	-0.0618474	0.0654495	-0.677953	0.0778875	0.00819644	-0.324641	-0.152289	0.194039	0.00639855	-0.0700487	0.748332	-0.549294	-0.312038	-0.530178	-0.0138802	0.198868	0.153531	0.417169	-0.457403	0.529631	0.231171	-0.18864	0.209224	0.635521	0.311347	0.414901	-0.0119733	-0.330979	-0.204655	-0.365912	0.226092	0.129466	-0.0174305	-0.434752	0.21619	-0.544211	0.0277225	-0.412622	0.330566	0.191789	-0.292276
-4.65004	-0.679884	0.447122	-0.187078	-0.605882	0.475806	0.181605	-0.281965	-0.553931	-0.063335	0.0674853	-0.677236	0.0788537	0.0083612	-0.324878	-0.150965	0.193457	0.00589103	-0.0692714	0.749104	-0.55005	-0.313223	-0.528543	-0.0129007	0.199296	0.155125	0.417355	-0.457677	0.52966	0.233695	-0.188089	0.208615	0.635578	0.313448	0.415889	-0.0109724	-0.329901	-0.205547	-0.366869	0.225923	0.128108	-0.018486	-0.434818	0.216328	-0.545256	0.0261815	-0.411331	0.328685	0.191428	-0.292948
-4.64905	-0.67903	0.449202	-0.185894	-0.60701	0.474157	0.179905	-0.281949	-0.553519	-0.0648137	0.0695446	-0.676514	0.0798192	0.00852611	-0.325116	-0.149635	0.192885	0.00540446	-0.0684894	0.749857	-0.550807	-0.314413	-0.526892	-0.0119211	0.199706	0.156717	0.417549	-0.457942	0.529677	0.236225	-0.187537	0.208007	0.635651	0.315532	0.416865	-0.00996653	-0.32882	-0.206456	-0.367825	0.225741	0.126749	-0.0195502	-0.434873	0.21645	-0.546295	0.024648	-0.410043	0.326824	0.191064	-0.293623
-4.64807	-0.678176	0.451281	-0.184731	-0.608135	0.472502	0.178206	-0.281908	-0.553111	-0.0662834	0.0716274	-0.675784	0.0807841	0.0086911	-0.325358	-0.148299	0.192322	0.00493893	-0.0677026	0.750589	-0.551563	-0.315609	-0.525225	-0.0109415	0.200096	0.158308	0.41775	-0.4582	0.52968	0.238759	-0.186984	0.207399	0.635741	0.317601	0.417829	-0.00895569	-0.327736	-0.207384	-0.36878	0.225546	0.125389	-0.0206228	-0.434917	0.216554	-0.547328	0.0231222	-0.408759	0.324982	0.190698	-0.294302
-4.64709	-0.67732	0.453359	-0.183589	-0.609258	0.470843	0.176507	-0.281842	-0.552706	-0.067744	0.0737337	-0.675048	0.0817482	0.00885609	-0.325601	-0.146956	0.191768	0.00449451	-0.0669112	0.751302	-0.55232	-0.31681	-0.523542	-0.00996182	0.200467	0.159897	0.417959	-0.45845	0.52967	0.241299	-0.18643	0.206793	0.635848	0.319654	0.418781	-0.00794002	-0.326651	-0.208329	-0.369733	0.225338	0.124028	-0.0217036	-0.43495	0.216641	-0.548354	0.0216043	-0.407478	0.323159	0.190328	-0.294985
-4.64611	-0.676464	0.455435	-0.182469	-0.610379	0.46918	0.17481	-0.281751	-0.552306	-0.0691956	0.0758635	-0.674305	0.0827113	0.00902101	-0.325846	-0.145608	0.191223	0.0040713	-0.066115	0.751994	-0.553076	-0.318017	-0.521843	-0.0089822	0.20082	0.161485	0.418176	-0.458691	0.529647	0.243843	-0.185874	0.206187	0.635971	0.321691	0.419721	-0.0069196	-0.325564	-0.209292	-0.370684	0.225118	0.122667	-0.0227925	-0.434973	0.216712	-0.549374	0.0200943	-0.406201	0.321356	0.189956	-0.295671
-4.64512	-0.675606	0.457509	-0.18137	-0.611499	0.467511	0.173113	-0.281636	-0.551909	-0.0706379	0.0780169	-0.673555	0.0836735	0.0091858	-0.326094	-0.144254	0.190688	0.00366936	-0.065314	0.752667	-0.553832	-0.319229	-0.52013	-0.00800263	0.201154	0.163071	0.418401	-0.458925	0.52961	0.246393	-0.185317	0.205583	0.636111	0.323711	0.42065	-0.00589455	-0.324474	-0.210272	-0.371634	0.224884	0.121305	-0.0238893	-0.434985	0.216766	-0.550388	0.0185923	-0.404928	0.319573	0.189581	-0.296361
-4.64414	-0.674747	0.459582	-0.180292	-0.612616	0.465839	0.171417	-0.281495	-0.551516	-0.0720711	0.080194	-0.6728	0.0846345	0.00935038	-0.326344	-0.142895	0.190162	0.00328879	-0.0645082	0.753321	-0.554588	-0.320446	-0.518401	-0.00702313	0.201469	0.164656	0.418633	-0.459151	0.52956	0.248947	-0.184759	0.20498	0.636268	0.325715	0.421567	-0.00486495	-0.323384	-0.21127	-0.372581	0.224637	0.119942	-0.0249939	-0.434986	0.216803	-0.551395	0.0170984	-0.403659	0.31781	0.189203	-0.297054
-4.64316	-0.673887	0.461652	-0.179235	-0.613731	0.464163	0.169721	-0.281328	-0.551128	-0.0734949	0.0823946	-0.672038	0.0855943	0.00951468	-0.326596	-0.141531	0.189644	0.00292965	-0.0636975	0.753954	-0.555344	-0.321668	-0.516657	-0.00604373	0.201765	0.166239	0.418873	-0.459369	0.529497	0.251505	-0.1842	0.204378	0.636441	0.327702	0.422471	-0.00383092	-0.322291	-0.212285	-0.373526	0.224377	0.11858	-0.0261061	-0.434977	0.216824	-0.552395	0.0156129	-0.402393	0.316066	0.188823	-0.29775
-4.64217	-0.673027	0.463721	-0.1782	-0.614844	0.462482	0.168027	-0.281137	-0.550743	-0.0749094	0.0846189	-0.671269	0.0865527	0.00967864	-0.32685	-0.140161	0.189136	0.00259201	-0.0628819	0.754568	-0.5561	-0.322894	-0.514899	-0.00506446	0.202042	0.16782	0.419121	-0.459578	0.529419	0.254067	-0.183639	0.203778	0.63663	0.329673	0.423364	-0.00279255	-0.321197	-0.213316	-0.374468	0.224103	0.117218	-0.0272256	-0.434957	0.216828	-0.553389	0.0141356	-0.401131	0.314343	0.188439	-0.298449
-4.64119	-0.672165	0.465787	-0.177187	-0.615954	0.460798	0.166333	-0.28092	-0.550363	-0.0763145	0.0868669	-0.670495	0.0875097	0.00984217	-0.327106	-0.138786	0.188636	0.00227594	-0.0620615	0.755162	-0.556856	-0.324125	-0.513126	-0.00408534	0.2023	0.169399	0.419376	-0.45978	0.529328	0.256634	-0.183078	0.203179	0.636836	0.331627	0.424245	-0.00174995	-0.320102	-0.214365	-0.375408	0.223817	0.115855	-0.0283523	-0.434928	0.216816	-0.554376	0.0126669	-0.399874	0.31264	0.188053	-0.299152
-4.64021	-0.671303	0.46785	-0.176195	-0.617063	0.45911	0.16464	-0.280678	-0.549987	-0.0777102	0.0891385	-0.669715	0.088465	0.0100052	-0.327365	-0.137407	0.188145	0.00198152	-0.061236	0.755737	-0.557611	-0.325361	-0.511339	-0.00310642	0.202539	0.170976	0.419639	-0.459974	0.529223	0.259204	-0.182515	0.202582	0.637058	0.333563	0.425114	-0.000703228	-0.319006	-0.21543	-0.376345	0.223517	0.114494	-0.0294861	-0.434887	0.216788	-0.555355	0.0112067	-0.39862	0.310958	0.187663	-0.299858
-4.63922	-0.67044	0.46991	-0.175225	-0.618169	0.457418	0.162948	-0.280411	-0.549615	-0.0790963	0.0914338	-0.668928	0.0894187	0.0101677	-0.327626	-0.136024	0.187663	0.0017088	-0.0604056	0.756291	-0.558366	-0.326601	-0.509537	-0.0021277	0.20276	0.172552	0.41991	-0.46016	0.529104	0.261778	-0.181951	0.201986	0.637296	0.335483	0.42597	0.00034752	-0.317909	-0.216512	-0.377279	0.223203	0.113133	-0.0306267	-0.434837	0.216743	-0.556328	0.00975508	-0.397371	0.309296	0.187271	-0.300566
-4.63824	-0.669576	0.471968	-0.174277	-0.619273	0.455724	0.161257	-0.280118	-0.549248	-0.0804729	0.0937527	-0.668136	0.0903705	0.0103295	-0.327889	-0.134636	0.187189	0.00145785	-0.0595702	0.756827	-0.559121	-0.327845	-0.507721	-0.00114923	0.202962	0.174125	0.420188	-0.460338	0.528972	0.264355	-0.181386	0.201392	0.63755	0.337386	0.426815	0.00140219	-0.316812	-0.21761	-0.378209	0.222876	0.111773	-0.0317741	-0.434776	0.216683	-0.557293	0.00831224	-0.396126	0.307655	0.186876	-0.301278
-4.63726	-0.668712	0.474022	-0.17335	-0.620375	0.454026	0.159567	-0.2798	-0.548885	-0.0818398	0.0960953	-0.667337	0.0913205	0.0104907	-0.328154	-0.133243	0.186723	0.00122872	-0.0587298	0.757343	-0.559876	-0.329093	-0.505892	-0.000171026	0.203145	0.175696	0.420474	-0.460507	0.528825	0.266935	-0.180821	0.2008	0.63782	0.339272	0.427648	0.00246066	-0.315713	-0.218724	-0.379136	0.222536	0.110414	-0.0329279	-0.434706	0.216606	-0.55825	0.00687823	-0.394885	0.306035	0.186478	-0.301993
-4.63628	-0.667847	0.476073	-0.172445	-0.621474	0.452324	0.157878	-0.279457	-0.548527	-0.083197	0.0984616	-0.666533	0.0922683	0.010651	-0.328421	-0.131848	0.186266	0.00102148	-0.0578843	0.757839	-0.56063	-0.330345	-0.504049	0.00080688	0.203309	0.177266	0.420767	-0.460669	0.528664	0.269519	-0.180254	0.200211	0.638106	0.34114	0.428468	0.00352285	-0.314614	-0.219854	-0.38006	0.222182	0.109056	-0.0340881	-0.434625	0.216513	-0.559201	0.00545313	-0.393649	0.304435	0.186078	-0.30271
-4.63529	-0.666982	0.478121	-0.171563	-0.622571	0.450621	0.15619	-0.279088	-0.548174	-0.0845445	0.100851	-0.665724	0.093214	0.0108105	-0.32869	-0.130448	0.185817	0.000836173	-0.0570337	0.758317	-0.561384	-0.331601	-0.502193	0.00178446	0.203455	0.178833	0.421068	-0.460823	0.528489	0.272105	-0.179686	0.199623	0.638408	0.34299	0.429277	0.00458864	-0.313515	-0.221001	-0.380979	0.221815	0.107699	-0.0352544	-0.434534	0.216405	-0.560144	0.00403703	-0.392417	0.302857	0.185674	-0.30343
-4.63431	-0.666117	0.480165	-0.170702	-0.623665	0.448914	0.154503	-0.278693	-0.547825	-0.0858821	0.103265	-0.664908	0.0941574	0.0109691	-0.328961	-0.129045	0.185375	0.000672853	-0.056178	0.758774	-0.562138	-0.33286	-0.500324	0.00276169	0.203581	0.180398	0.421377	-0.460969	0.528299	0.274694	-0.179117	0.199037	0.638725	0.344823	0.430073	0.00565792	-0.312416	-0.222162	-0.381895	0.221434	0.106344	-0.0364267	-0.434434	0.216281	-0.561079	0.00263001	-0.391189	0.3013	0.185267	-0.304153
-4.63333	-0.665251	0.482205	-0.169863	-0.624757	0.447205	0.152816	-0.278273	-0.547481	-0.08721	0.105702	-0.664088	0.0950985	0.0111267	-0.329235	-0.127638	0.184942	0.00053157	-0.0553172	0.759213	-0.562891	-0.334123	-0.498442	0.00373854	0.203689	0.18196	0.421693	-0.461107	0.528096	0.277285	-0.178547	0.198454	0.639058	0.346639	0.430857	0.0067306	-0.311316	-0.223339	-0.382806	0.221039	0.10499	-0.0376048	-0.434323	0.216141	-0.562006	0.00123215	-0.389966	0.299764	0.184858	-0.304879
-4.63234	-0.664384	0.484241	-0.169046	-0.625846	0.445493	0.151131	-0.277827	-0.547143	-0.0885279	0.108163	-0.663261	0.096037	0.0112832	-0.32951	-0.126229	0.184517	0.00041237	-0.0544512	0.759633	-0.563644	-0.335389	-0.496547	0.00471498	0.203779	0.183521	0.422016	-0.461237	0.527877	0.279879	-0.177977	0.197873	0.639406	0.348436	0.431629	0.00780656	-0.310217	-0.224532	-0.383713	0.22063	0.103639	-0.0387884	-0.434203	0.215986	-0.562926	-0.000156481	-0.388748	0.29825	0.184445	-0.305607
-4.63136	-0.663518	0.486272	-0.168251	-0.626933	0.443779	0.149447	-0.277356	-0.546809	-0.0898359	0.110647	-0.66243	0.0969729	0.0114386	-0.329788	-0.124816	0.1841	0.000315296	-0.05358	0.760033	-0.564396	-0.336658	-0.494639	0.00569098	0.203849	0.185079	0.422347	-0.461359	0.527645	0.282475	-0.177405	0.197295	0.63977	0.350216	0.432389	0.00888569	-0.309118	-0.22574	-0.384615	0.220208	0.102289	-0.0399776	-0.434073	0.215815	-0.563837	-0.0015358	-0.387534	0.296757	0.18403	-0.306337
-4.63038	-0.662651	0.4883	-0.167479	-0.628017	0.442063	0.147763	-0.276859	-0.54648	-0.0911339	0.113155	-0.661593	0.097906	0.0115928	-0.330067	-0.123401	0.18369	0.000240389	-0.0527036	0.760414	-0.565148	-0.337931	-0.492719	0.00666652	0.203901	0.186634	0.422685	-0.461473	0.527398	0.285072	-0.176833	0.196719	0.640149	0.351977	0.433137	0.00996789	-0.30802	-0.226962	-0.385513	0.219772	0.100942	-0.0411719	-0.433934	0.215629	-0.564741	-0.00290575	-0.386325	0.295285	0.183611	-0.30707
-4.62939	-0.661784	0.490322	-0.166728	-0.629099	0.440345	0.146081	-0.276337	-0.546156	-0.0924218	0.115687	-0.660751	0.0988363	0.0117457	-0.330349	-0.121983	0.183288	0.000187688	-0.051822	0.760777	-0.5659	-0.339206	-0.490787	0.00764156	0.203935	0.188188	0.423031	-0.46158	0.527136	0.287671	-0.176259	0.196146	0.640543	0.35372	0.433872	0.0110531	-0.306922	-0.2282	-0.386405	0.219323	0.0995973	-0.0423714	-0.433785	0.215427	-0.565636	-0.00426624	-0.385121	0.293836	0.18319	-0.307805
-4.62841	-0.660917	0.49234	-0.166	-0.630178	0.438625	0.1444	-0.275789	-0.545837	-0.0936996	0.118241	-0.659904	0.0997636	0.0118973	-0.330632	-0.120563	0.182894	0.000157228	-0.0509351	0.76112	-0.566651	-0.340484	-0.488843	0.00861609	0.203949	0.189738	0.423384	-0.461678	0.52686	0.290272	-0.175685	0.195576	0.640952	0.355446	0.434595	0.0121411	-0.305824	-0.229452	-0.387292	0.218859	0.098255	-0.0435757	-0.433627	0.215211	-0.566523	-0.00561723	-0.383922	0.292408	0.182765	-0.308543
-4.62743	-0.66005	0.494353	-0.165294	-0.631254	0.436904	0.14272	-0.275216	-0.545524	-0.0949673	0.12082	-0.659052	0.100688	0.0120475	-0.330918	-0.119141	0.182506	0.000149043	-0.0500429	0.761444	-0.567401	-0.341764	-0.486888	0.00959007	0.203946	0.191286	0.423744	-0.461769	0.526569	0.292873	-0.17511	0.195008	0.641376	0.357152	0.435306	0.0132318	-0.304728	-0.230718	-0.388174	0.218382	0.0969155	-0.0447848	-0.433459	0.214979	-0.567402	-0.00695864	-0.382728	0.291003	0.182338	-0.309283
-4.62644	-0.659183	0.49636	-0.16461	-0.632327	0.435181	0.14104	-0.274617	-0.545216	-0.0962247	0.123421	-0.658195	0.101609	0.0121962	-0.331205	-0.117717	0.182126	0.000163162	-0.0491455	0.76175	-0.568151	-0.343047	-0.484921	0.0105635	0.203924	0.192832	0.424112	-0.461852	0.526264	0.295476	-0.174534	0.194444	0.641815	0.358841	0.436005	0.0143252	-0.303633	-0.231999	-0.389051	0.21789	0.095579	-0.0459984	-0.433282	0.214732	-0.568272	-0.00829042	-0.381539	0.289619	0.181908	-0.310025
-4.62546	-0.658316	0.498363	-0.163948	-0.633398	0.433456	0.139362	-0.273992	-0.544913	-0.0974719	0.126047	-0.657333	0.102526	0.0123433	-0.331494	-0.116292	0.181753	0.000199615	-0.0482427	0.762037	-0.568901	-0.344333	-0.482943	0.0115363	0.203883	0.194375	0.424487	-0.461927	0.525944	0.29808	-0.173958	0.193882	0.642268	0.360511	0.436691	0.0154211	-0.302539	-0.233293	-0.389922	0.217385	0.0942455	-0.0472163	-0.433095	0.214471	-0.569134	-0.0096125	-0.380354	0.288258	0.181474	-0.310769
-4.62448	-0.657449	0.50036	-0.163309	-0.634466	0.431731	0.137685	-0.273342	-0.544616	-0.0987088	0.128695	-0.656466	0.103441	0.0124888	-0.331786	-0.114865	0.181387	0.000258425	-0.0473346	0.762306	-0.569649	-0.34562	-0.480954	0.0125085	0.203824	0.195915	0.424869	-0.461995	0.525609	0.300684	-0.17338	0.193324	0.642736	0.362162	0.437365	0.0165195	-0.301446	-0.234602	-0.390786	0.216866	0.0929153	-0.0484384	-0.4329	0.214194	-0.569987	-0.0109248	-0.379175	0.286919	0.181038	-0.311515
-4.6235	-0.656582	0.502351	-0.162692	-0.635531	0.430005	0.136009	-0.272666	-0.544324	-0.0999354	0.131367	-0.655595	0.104351	0.0126326	-0.332079	-0.113436	0.181028	0.000339615	-0.0464211	0.762556	-0.570397	-0.346909	-0.478954	0.01348	0.203747	0.197452	0.425258	-0.462055	0.525259	0.303289	-0.172802	0.192769	0.643218	0.363794	0.438026	0.0176201	-0.300355	-0.235924	-0.391645	0.216333	0.0915886	-0.0496645	-0.432695	0.213904	-0.570832	-0.0122274	-0.378001	0.285602	0.180599	-0.312263
-4.62251	-0.655716	0.504336	-0.162097	-0.636593	0.428277	0.134335	-0.271965	-0.544038	-0.101152	0.134062	-0.654719	0.105258	0.0127746	-0.332373	-0.112007	0.180676	0.000443206	-0.0455023	0.762788	-0.571145	-0.3482	-0.476943	0.0144508	0.203652	0.198986	0.425654	-0.462107	0.524894	0.305894	-0.172223	0.192218	0.643714	0.365408	0.438675	0.018723	-0.299266	-0.23726	-0.392498	0.215786	0.0902655	-0.0508943	-0.432482	0.213598	-0.571667	-0.0135201	-0.376832	0.284308	0.180157	-0.313013
-4.62153	-0.65485	0.506315	-0.161525	-0.637651	0.426549	0.132661	-0.271239	-0.543758	-0.102357	0.13678	-0.653838	0.106162	0.0129149	-0.33267	-0.110577	0.180331	0.000569215	-0.0445781	0.763001	-0.571892	-0.349493	-0.474923	0.0154209	0.203538	0.200518	0.426057	-0.462152	0.524515	0.308499	-0.171643	0.191669	0.644224	0.367003	0.439311	0.0198279	-0.298178	-0.238609	-0.393344	0.215224	0.0889462	-0.0521278	-0.432259	0.213278	-0.572494	-0.0148029	-0.375669	0.283036	0.179711	-0.313765
-4.62055	-0.653984	0.508288	-0.160975	-0.638707	0.424821	0.130988	-0.270487	-0.543483	-0.103553	0.139521	-0.652953	0.107061	0.0130532	-0.332968	-0.109146	0.179992	0.000717656	-0.0436484	0.763196	-0.572638	-0.350787	-0.472892	0.0163903	0.203406	0.202047	0.426467	-0.462189	0.52412	0.311103	-0.171063	0.191125	0.644748	0.368579	0.439935	0.0209348	-0.297092	-0.239971	-0.394183	0.214649	0.0876308	-0.0533647	-0.432028	0.212944	-0.573312	-0.0160757	-0.374511	0.281787	0.179263	-0.314518
-4.61956	-0.653119	0.510254	-0.160447	-0.63976	0.423092	0.129317	-0.269709	-0.543214	-0.104737	0.142285	-0.652064	0.107956	0.0131896	-0.333268	-0.107715	0.179659	0.000888542	-0.0427134	0.763373	-0.573383	-0.352083	-0.470851	0.0173589	0.203256	0.203572	0.426884	-0.462218	0.523711	0.313707	-0.170482	0.190584	0.645286	0.370135	0.440547	0.0220436	-0.296009	-0.241346	-0.395016	0.21406	0.0863196	-0.0546049	-0.431788	0.212596	-0.57412	-0.0173386	-0.373358	0.280561	0.178812	-0.315274
-4.61858	-0.652254	0.512214	-0.159942	-0.64081	0.421363	0.127647	-0.268906	-0.542951	-0.105912	0.145072	-0.65117	0.108847	0.0133239	-0.33357	-0.106284	0.179333	0.00108188	-0.0417728	0.763532	-0.574127	-0.353379	-0.468801	0.0183267	0.203088	0.205095	0.427309	-0.46224	0.523286	0.316311	-0.1699	0.190047	0.645837	0.371673	0.441146	0.0231541	-0.294928	-0.242733	-0.395841	0.213457	0.0850126	-0.0558482	-0.431539	0.212233	-0.57492	-0.0185915	-0.372211	0.279358	0.178358	-0.31603
-4.6176	-0.651389	0.514167	-0.159459	-0.641857	0.419634	0.125978	-0.268078	-0.542694	-0.107075	0.147882	-0.650272	0.109734	0.0134561	-0.333873	-0.104852	0.179013	0.00129768	-0.0408269	0.763673	-0.574871	-0.354677	-0.466741	0.0192937	0.202902	0.206615	0.42774	-0.462255	0.522847	0.318914	-0.169318	0.189513	0.646402	0.373191	0.441732	0.0242663	-0.293849	-0.244133	-0.39666	0.212839	0.0837101	-0.0570943	-0.431282	0.211857	-0.57571	-0.0198343	-0.371069	0.278178	0.1779	-0.316788
-4.61661	-0.650526	0.516113	-0.158998	-0.6429	0.417906	0.12431	-0.267224	-0.542443	-0.108228	0.150715	-0.64937	0.110616	0.0135862	-0.334178	-0.103421	0.1787	0.00153595	-0.0398754	0.763796	-0.575614	-0.355976	-0.464673	0.0202599	0.202698	0.208131	0.428177	-0.462262	0.522392	0.321515	-0.168735	0.188984	0.64698	0.37469	0.442306	0.02538	-0.292773	-0.245546	-0.397471	0.212207	0.0824123	-0.0583431	-0.431016	0.211467	-0.576491	-0.021067	-0.369932	0.277021	0.17744	-0.317548
-4.61563	-0.649662	0.518052	-0.15856	-0.64394	0.416177	0.122643	-0.266345	-0.542198	-0.10937	0.15357	-0.648464	0.111494	0.013714	-0.334484	-0.101991	0.178392	0.00179668	-0.0389185	0.763901	-0.576356	-0.357275	-0.462595	0.0212252	0.202476	0.209644	0.428622	-0.462262	0.521922	0.324116	-0.168151	0.188458	0.647571	0.376169	0.442868	0.0264951	-0.291699	-0.24697	-0.398274	0.211562	0.0811192	-0.0595945	-0.430742	0.211063	-0.577262	-0.0222896	-0.368802	0.275887	0.176977	-0.318309
-4.61465	-0.6488	0.519984	-0.158144	-0.644977	0.414449	0.120978	-0.265441	-0.541959	-0.110502	0.156448	-0.647554	0.112368	0.0138396	-0.334792	-0.100561	0.17809	0.00207988	-0.0379561	0.763989	-0.577097	-0.358575	-0.460509	0.0221895	0.202237	0.211154	0.429073	-0.462254	0.521438	0.326715	-0.167567	0.187937	0.648175	0.377629	0.443416	0.0276116	-0.290629	-0.248407	-0.39907	0.210902	0.0798311	-0.0608482	-0.430459	0.210645	-0.578024	-0.023502	-0.367677	0.274776	0.176511	-0.319072
-4.61367	-0.647938	0.521908	-0.157751	-0.64601	0.412721	0.119313	-0.264512	-0.541727	-0.111623	0.159349	-0.646641	0.113236	0.0139628	-0.335102	-0.0991318	0.177793	0.00238553	-0.0369882	0.764059	-0.577837	-0.359875	-0.458414	0.023153	0.20198	0.212661	0.429531	-0.46224	0.520938	0.329312	-0.166982	0.18742	0.648791	0.379069	0.443952	0.0287293	-0.289561	-0.249855	-0.399858	0.210228	0.0785481	-0.062104	-0.430168	0.210214	-0.578776	-0.0247043	-0.366557	0.273689	0.176042	-0.319835
-4.61268	-0.647077	0.523824	-0.157379	-0.64704	0.410995	0.117651	-0.263558	-0.5415	-0.112733	0.162272	-0.645723	0.1141	0.0140835	-0.335413	-0.0977038	0.177503	0.00271365	-0.0360148	0.764112	-0.578576	-0.361175	-0.456311	0.0241154	0.201705	0.214164	0.429996	-0.462218	0.520423	0.331907	-0.166396	0.186907	0.649421	0.38049	0.444476	0.029848	-0.288497	-0.251315	-0.400638	0.20954	0.0772703	-0.0633618	-0.429869	0.209769	-0.579518	-0.0258964	-0.365443	0.272625	0.175569	-0.3206
-4.6117	-0.646216	0.525733	-0.157031	-0.648067	0.409269	0.115989	-0.262578	-0.54128	-0.113832	0.165218	-0.644802	0.114959	0.0142018	-0.335725	-0.0962772	0.177217	0.0030642	-0.0350358	0.764148	-0.579314	-0.362475	-0.4542	0.0250769	0.201413	0.215664	0.430467	-0.462189	0.519893	0.3345	-0.16581	0.186398	0.650062	0.381891	0.444986	0.0309678	-0.287436	-0.252786	-0.401409	0.208837	0.075998	-0.0646214	-0.429562	0.209311	-0.580251	-0.0270783	-0.364335	0.271584	0.175094	-0.321366
-4.61072	-0.645357	0.527634	-0.156704	-0.64909	0.407544	0.114328	-0.261574	-0.541067	-0.11492	0.168185	-0.643877	0.115813	0.0143175	-0.336038	-0.094852	0.176938	0.0034372	-0.0340513	0.764166	-0.580051	-0.363776	-0.452082	0.0260374	0.201103	0.217161	0.430945	-0.462153	0.519348	0.337091	-0.165224	0.185895	0.650716	0.383272	0.445484	0.0320884	-0.286379	-0.254268	-0.402173	0.208121	0.0747313	-0.0658827	-0.429246	0.20884	-0.580974	-0.0282499	-0.363233	0.270567	0.174616	-0.322132
-4.60973	-0.644498	0.529526	-0.1564	-0.65011	0.405821	0.112669	-0.260544	-0.540859	-0.115998	0.171175	-0.642948	0.116661	0.0144306	-0.336353	-0.0934287	0.176663	0.00383261	-0.0330613	0.764167	-0.580787	-0.365076	-0.449956	0.0269969	0.200776	0.218654	0.431429	-0.46211	0.518787	0.339679	-0.164637	0.185395	0.651382	0.384633	0.445969	0.0332097	-0.285325	-0.25576	-0.402927	0.20739	0.0734704	-0.0671453	-0.428923	0.208356	-0.581687	-0.0294113	-0.362137	0.269574	0.174135	-0.3229
-4.60875	-0.643641	0.53141	-0.156118	-0.651126	0.404099	0.111011	-0.25949	-0.540659	-0.117064	0.174187	-0.642016	0.117504	0.014541	-0.336669	-0.0920072	0.176393	0.00425043	-0.0320657	0.764152	-0.581522	-0.366375	-0.447823	0.0279552	0.200432	0.220144	0.43192	-0.46206	0.518212	0.342265	-0.164049	0.184901	0.652059	0.385974	0.446441	0.0343318	-0.284276	-0.257264	-0.403673	0.206645	0.0722153	-0.0684092	-0.428592	0.207859	-0.582389	-0.0305625	-0.361047	0.268604	0.173651	-0.323668
-4.60777	-0.642784	0.533285	-0.155859	-0.652138	0.402378	0.109355	-0.258411	-0.540465	-0.11812	0.177221	-0.641081	0.118342	0.0146487	-0.336987	-0.090588	0.176129	0.00469063	-0.0310645	0.764119	-0.582256	-0.367674	-0.445683	0.0289125	0.20007	0.22163	0.432417	-0.462003	0.517621	0.344847	-0.163461	0.184411	0.652749	0.387295	0.446901	0.0354543	-0.28323	-0.258778	-0.40441	0.205886	0.0709663	-0.0696741	-0.428253	0.20735	-0.583082	-0.0317033	-0.359962	0.267659	0.173164	-0.324438
-4.60678	-0.641929	0.535151	-0.155621	-0.653147	0.40066	0.1077	-0.257307	-0.540277	-0.119164	0.180277	-0.640142	0.119174	0.0147536	-0.337305	-0.0891711	0.175869	0.00515319	-0.0300578	0.76407	-0.582989	-0.368972	-0.443536	0.0298687	0.199692	0.223112	0.43292	-0.46194	0.517015	0.347426	-0.162872	0.183926	0.653449	0.388595	0.447347	0.0365773	-0.282188	-0.260302	-0.405138	0.205113	0.0697236	-0.07094	-0.427906	0.206827	-0.583764	-0.0328339	-0.358884	0.266737	0.172674	-0.325208
-4.6058	-0.641075	0.537009	-0.155406	-0.654152	0.398943	0.106046	-0.256178	-0.540096	-0.120198	0.183354	-0.6392	0.120001	0.0148556	-0.337624	-0.0877569	0.175614	0.00563809	-0.0290455	0.764004	-0.583721	-0.370269	-0.441383	0.0308237	0.199296	0.224591	0.43343	-0.461869	0.516394	0.350002	-0.162283	0.183446	0.654161	0.389876	0.447781	0.0377006	-0.281151	-0.261837	-0.405857	0.204326	0.0684872	-0.0722065	-0.427552	0.206292	-0.584437	-0.0339543	-0.357811	0.265839	0.172182	-0.325978
-4.60482	-0.640221	0.538858	-0.155213	-0.655153	0.397228	0.104393	-0.255025	-0.539922	-0.12122	0.186453	-0.638255	0.120822	0.0149548	-0.337945	-0.0863455	0.175364	0.0061453	-0.0280276	0.763922	-0.584451	-0.371565	-0.439224	0.0317775	0.198884	0.226066	0.433946	-0.461792	0.515757	0.352574	-0.161694	0.182971	0.654884	0.391136	0.448202	0.0388241	-0.280118	-0.263381	-0.406566	0.203524	0.0672573	-0.0734735	-0.42719	0.205745	-0.585099	-0.0350643	-0.356745	0.264965	0.171686	-0.32675
-4.60383	-0.639369	0.540697	-0.155043	-0.65615	0.395516	0.102742	-0.253847	-0.539755	-0.122232	0.189574	-0.637307	0.121637	0.0150509	-0.338266	-0.0849371	0.175118	0.00667479	-0.0270042	0.763824	-0.58518	-0.372859	-0.437058	0.0327301	0.198455	0.227537	0.434467	-0.461709	0.515106	0.355142	-0.161104	0.182501	0.655618	0.392376	0.448609	0.0399477	-0.279089	-0.264935	-0.407266	0.202709	0.0660341	-0.0747409	-0.426821	0.205185	-0.58575	-0.0361641	-0.355685	0.264115	0.171187	-0.327521
-4.60285	-0.638519	0.542526	-0.154894	-0.657144	0.393806	0.101093	-0.252645	-0.539594	-0.123232	0.192716	-0.636356	0.122446	0.015144	-0.338589	-0.083532	0.174877	0.00722653	-0.0259752	0.763709	-0.585908	-0.374153	-0.434887	0.0336815	0.198009	0.229005	0.434995	-0.461619	0.514439	0.357707	-0.160513	0.182037	0.656362	0.393595	0.449004	0.0410713	-0.278066	-0.266498	-0.407956	0.201879	0.0648177	-0.0760085	-0.426444	0.204613	-0.586391	-0.0372536	-0.354631	0.263289	0.170686	-0.328293
-4.60187	-0.637669	0.544347	-0.154768	-0.658134	0.392098	0.0994442	-0.251419	-0.539441	-0.124221	0.195879	-0.635402	0.123249	0.015234	-0.338912	-0.0821304	0.174639	0.00780048	-0.0249406	0.763578	-0.586635	-0.375444	-0.432711	0.0346316	0.197547	0.230469	0.435529	-0.461522	0.513758	0.360266	-0.159922	0.181578	0.657117	0.394794	0.449386	0.0421947	-0.277047	-0.26807	-0.408636	0.201035	0.0636082	-0.077276	-0.426061	0.20403	-0.587021	-0.0383328	-0.353583	0.262488	0.170181	-0.329066
-4.60089	-0.636821	0.546157	-0.154663	-0.659119	0.390394	0.0977973	-0.250168	-0.539294	-0.125199	0.199063	-0.634445	0.124045	0.0153208	-0.339236	-0.0807325	0.174406	0.0083966	-0.0239004	0.763432	-0.58736	-0.376734	-0.43053	0.0355805	0.197068	0.231928	0.436069	-0.461419	0.513061	0.362822	-0.159331	0.181124	0.657882	0.395973	0.449755	0.0433179	-0.276034	-0.269652	-0.409305	0.200177	0.0624059	-0.0785433	-0.425669	0.203434	-0.587641	-0.0394018	-0.352541	0.261711	0.169674	-0.329838
-4.5999	-0.635975	0.547957	-0.154581	-0.660101	0.388692	0.0961519	-0.248893	-0.539154	-0.126166	0.202268	-0.633486	0.124835	0.0154045	-0.339561	-0.0793385	0.174177	0.00901486	-0.0228546	0.763269	-0.588084	-0.378022	-0.428343	0.036528	0.196572	0.233384	0.436615	-0.46131	0.512349	0.365372	-0.158739	0.180676	0.658657	0.397131	0.450111	0.0444407	-0.275025	-0.271242	-0.409965	0.199305	0.0612109	-0.0798102	-0.425271	0.202826	-0.58825	-0.0404605	-0.351505	0.260958	0.169163	-0.330611
-4.59892	-0.63513	0.549747	-0.15452	-0.661078	0.386993	0.0945078	-0.247595	-0.539022	-0.127122	0.205494	-0.632523	0.125619	0.0154848	-0.339887	-0.0779487	0.173951	0.00965522	-0.0218032	0.763091	-0.588806	-0.379307	-0.426152	0.0374742	0.196061	0.234836	0.437166	-0.461194	0.511622	0.367918	-0.158147	0.180233	0.659442	0.398268	0.450453	0.0455631	-0.274022	-0.272841	-0.410614	0.198419	0.0600232	-0.0810766	-0.424866	0.202207	-0.588848	-0.041509	-0.350476	0.260229	0.16865	-0.331384
-4.59794	-0.634286	0.551527	-0.154482	-0.662051	0.385297	0.0928653	-0.246272	-0.538896	-0.128066	0.20874	-0.631559	0.126396	0.0155619	-0.340213	-0.0765632	0.17373	0.0103176	-0.0207463	0.762898	-0.589527	-0.38059	-0.423956	0.038419	0.195534	0.236284	0.437723	-0.461072	0.510879	0.370458	-0.157554	0.179796	0.660237	0.399384	0.450783	0.0466849	-0.273024	-0.274448	-0.411253	0.197519	0.0588431	-0.0823422	-0.424454	0.201576	-0.589436	-0.0425473	-0.349453	0.259525	0.168134	-0.332157
-4.59695	-0.633444	0.553296	-0.154465	-0.663021	0.383605	0.0912242	-0.244925	-0.538778	-0.128999	0.212007	-0.630591	0.127167	0.0156356	-0.34054	-0.0751823	0.173511	0.011002	-0.0196838	0.762689	-0.590247	-0.381871	-0.421757	0.0393624	0.19499	0.237728	0.438286	-0.460945	0.510122	0.372993	-0.156962	0.179365	0.66104	0.40048	0.451099	0.047806	-0.272032	-0.276063	-0.411881	0.196605	0.0576707	-0.0836069	-0.424035	0.200934	-0.590012	-0.0435754	-0.348437	0.258846	0.167615	-0.332929
-4.59597	-0.632604	0.555055	-0.154471	-0.663986	0.381916	0.0895846	-0.243555	-0.538667	-0.129921	0.215294	-0.629622	0.127931	0.0157058	-0.340867	-0.0738062	0.173297	0.0117084	-0.0186157	0.762465	-0.590965	-0.383149	-0.419553	0.0403044	0.194431	0.239167	0.438855	-0.460811	0.50935	0.375522	-0.156368	0.17894	0.661853	0.401554	0.451402	0.0489263	-0.271046	-0.277686	-0.412498	0.195677	0.056506	-0.0848705	-0.423609	0.200281	-0.590578	-0.0445933	-0.347426	0.258191	0.167094	-0.333702
-4.59499	-0.631765	0.556803	-0.154498	-0.664946	0.380231	0.0879465	-0.242161	-0.538563	-0.130832	0.218602	-0.62865	0.128688	0.0157726	-0.341195	-0.072435	0.173085	0.0124366	-0.017542	0.762226	-0.591681	-0.384424	-0.417346	0.0412449	0.193856	0.240603	0.439429	-0.460671	0.508562	0.378046	-0.155775	0.178521	0.662675	0.402608	0.451692	0.0500458	-0.270066	-0.279317	-0.413105	0.194734	0.0553494	-0.0861328	-0.423177	0.199616	-0.591132	-0.0456011	-0.346423	0.25756	0.166569	-0.334474
-4.594	-0.630928	0.55854	-0.154547	-0.665902	0.37855	0.0863099	-0.240744	-0.538467	-0.131731	0.221929	-0.627675	0.129438	0.0158358	-0.341523	-0.0710692	0.172877	0.0131867	-0.0164628	0.761972	-0.592396	-0.385697	-0.415136	0.042184	0.193265	0.242034	0.440008	-0.460526	0.50776	0.380563	-0.155181	0.178108	0.663505	0.403641	0.451969	0.0511642	-0.269092	-0.280955	-0.4137	0.193778	0.0542008	-0.0873937	-0.422738	0.198941	-0.591676	-0.0465987	-0.345425	0.256955	0.166042	-0.335246
-4.59302	-0.630093	0.560265	-0.154617	-0.666854	0.376873	0.0846749	-0.239303	-0.538377	-0.132619	0.225276	-0.626699	0.13018	0.0158955	-0.341852	-0.0697087	0.172672	0.0139586	-0.015378	0.761703	-0.593109	-0.386966	-0.412922	0.0431216	0.192659	0.243461	0.440593	-0.460375	0.506943	0.383074	-0.154587	0.177701	0.664344	0.404653	0.452232	0.0522814	-0.268124	-0.282601	-0.414283	0.192808	0.0530605	-0.0886529	-0.422292	0.198255	-0.592208	-0.0475863	-0.344434	0.256374	0.165512	-0.336018
-4.59204	-0.62926	0.56198	-0.154709	-0.667802	0.3752	0.0830414	-0.237839	-0.538296	-0.133496	0.228643	-0.62572	0.130916	0.0159515	-0.34218	-0.0683539	0.172469	0.0147522	-0.0142877	0.76142	-0.593821	-0.388231	-0.410706	0.0440576	0.192037	0.244884	0.441183	-0.460218	0.506111	0.385578	-0.153992	0.1773	0.665192	0.405644	0.452483	0.0533974	-0.267163	-0.284253	-0.414856	0.191824	0.0519285	-0.0899104	-0.42184	0.197557	-0.592729	-0.0485638	-0.34345	0.255817	0.164979	-0.336789
-4.59106	-0.628428	0.563682	-0.154823	-0.668745	0.373531	0.0814095	-0.236352	-0.538221	-0.134361	0.23203	-0.62474	0.131644	0.0160038	-0.342509	-0.0670051	0.17227	0.0155674	-0.0131918	0.761122	-0.594531	-0.389494	-0.408487	0.044992	0.1914	0.246302	0.441779	-0.460056	0.505263	0.388076	-0.153397	0.176906	0.666047	0.406613	0.452719	0.0545121	-0.266208	-0.285913	-0.415416	0.190827	0.0508051	-0.0911658	-0.421382	0.19685	-0.593239	-0.0495312	-0.342472	0.255286	0.164443	-0.33756
-4.59007	-0.627598	0.565373	-0.154958	-0.669683	0.371867	0.0797792	-0.234842	-0.538154	-0.135215	0.235436	-0.623757	0.132365	0.0160524	-0.342838	-0.0656623	0.172073	0.0164043	-0.0120904	0.76081	-0.595239	-0.390752	-0.406265	0.0459249	0.190748	0.247716	0.442379	-0.459888	0.504401	0.390567	-0.152802	0.176518	0.66691	0.407562	0.452943	0.0556253	-0.265259	-0.287579	-0.415965	0.189815	0.0496902	-0.0924192	-0.420917	0.196132	-0.593737	-0.0504887	-0.3415	0.254779	0.163905	-0.33833
-4.58909	-0.626771	0.567052	-0.155115	-0.670617	0.370207	0.0781505	-0.233309	-0.538095	-0.136058	0.238861	-0.622773	0.133078	0.0160972	-0.343167	-0.0643258	0.171878	0.0172627	-0.0109835	0.760484	-0.595945	-0.392007	-0.404042	0.0468562	0.190081	0.249126	0.442985	-0.459715	0.503525	0.39305	-0.152206	0.176137	0.66778	0.408489	0.453153	0.056737	-0.264318	-0.289251	-0.416502	0.18879	0.0485841	-0.0936701	-0.420446	0.195403	-0.594224	-0.0514362	-0.340536	0.254297	0.163363	-0.3391
-4.58811	-0.625945	0.56872	-0.155293	-0.671546	0.368552	0.0765234	-0.231753	-0.538043	-0.136889	0.242305	-0.621786	0.133784	0.0161382	-0.343497	-0.0629958	0.171686	0.0181425	-0.00987102	0.760144	-0.59665	-0.393257	-0.401816	0.0477858	0.1894	0.250531	0.443596	-0.459536	0.502633	0.395526	-0.151611	0.175762	0.668658	0.409395	0.453349	0.0578469	-0.263383	-0.29093	-0.417027	0.18775	0.0474869	-0.0949186	-0.41997	0.194664	-0.594699	-0.0523738	-0.339577	0.25384	0.162819	-0.339868
-4.58712	-0.625122	0.570375	-0.155492	-0.67247	0.366903	0.0748979	-0.230175	-0.537999	-0.137709	0.245767	-0.620798	0.134482	0.0161754	-0.343826	-0.0616726	0.171496	0.0190437	-0.00875308	0.75979	-0.597353	-0.394503	-0.39959	0.0487137	0.188703	0.251932	0.444212	-0.459352	0.501727	0.397995	-0.151015	0.175394	0.669543	0.410279	0.453533	0.0589551	-0.262456	-0.292614	-0.41754	0.186698	0.0463987	-0.0961644	-0.419487	0.193916	-0.595163	-0.0533015	-0.338626	0.253408	0.162273	-0.340636
-4.58614	-0.6243	0.572017	-0.155712	-0.67339	0.365258	0.0732741	-0.228574	-0.537963	-0.138517	0.249249	-0.619809	0.135172	0.0162086	-0.344154	-0.0603564	0.171308	0.0199663	-0.00762964	0.759422	-0.598054	-0.395745	-0.397362	0.0496399	0.187992	0.253328	0.444833	-0.459164	0.500806	0.400456	-0.150418	0.175033	0.670434	0.411142	0.453702	0.0600614	-0.261535	-0.294304	-0.41804	0.185631	0.0453196	-0.0974074	-0.418998	0.193157	-0.595616	-0.0542195	-0.33768	0.253001	0.161723	-0.341403
-4.58516	-0.623481	0.573647	-0.155954	-0.674305	0.363618	0.071652	-0.226951	-0.537934	-0.139314	0.252749	-0.618818	0.135854	0.0162378	-0.344483	-0.0590474	0.171122	0.02091	-0.00650074	0.759041	-0.598753	-0.396983	-0.395133	0.0505644	0.187267	0.254719	0.445458	-0.45897	0.49987	0.402908	-0.149822	0.174679	0.671332	0.411984	0.453858	0.0611657	-0.260623	-0.296	-0.418528	0.184551	0.0442498	-0.0986473	-0.418504	0.192389	-0.596056	-0.0551276	-0.336742	0.252619	0.161171	-0.342169
-4.58417	-0.622664	0.575265	-0.156217	-0.675214	0.361984	0.0700315	-0.225306	-0.537912	-0.1401	0.256267	-0.617825	0.136528	0.0162631	-0.344811	-0.0577457	0.170938	0.0218749	-0.00536637	0.758647	-0.59945	-0.398215	-0.392903	0.0514872	0.186528	0.256106	0.446089	-0.458771	0.49892	0.405352	-0.149225	0.174331	0.672236	0.412805	0.454001	0.0622678	-0.259717	-0.297701	-0.419003	0.183457	0.0431893	-0.0998841	-0.418003	0.191611	-0.596485	-0.056026	-0.33581	0.252262	0.160616	-0.342933
-4.58319	-0.621849	0.576869	-0.1565	-0.676119	0.360355	0.0684128	-0.223639	-0.537899	-0.140874	0.259802	-0.616831	0.137193	0.0162843	-0.345139	-0.0564517	0.170756	0.0228609	-0.00422656	0.75824	-0.600145	-0.399443	-0.390673	0.0524081	0.185774	0.257489	0.446724	-0.458568	0.497955	0.407788	-0.148628	0.173991	0.673147	0.413604	0.45413	0.0633677	-0.258819	-0.299406	-0.419466	0.18235	0.0421383	-0.101118	-0.417498	0.190823	-0.596903	-0.0569147	-0.334885	0.25193	0.160059	-0.343697
-4.58221	-0.621037	0.578461	-0.156805	-0.677019	0.358733	0.0667958	-0.221949	-0.537893	-0.141637	0.263356	-0.615836	0.137851	0.0163014	-0.345467	-0.0551654	0.170575	0.0238679	-0.00308133	0.757819	-0.600838	-0.400665	-0.388442	0.0533273	0.185007	0.258866	0.447363	-0.45836	0.496976	0.410215	-0.148031	0.173658	0.674063	0.414381	0.454246	0.0644653	-0.25793	-0.301117	-0.419916	0.181229	0.041097	-0.102347	-0.416986	0.190026	-0.597308	-0.0577939	-0.333967	0.251623	0.159499	-0.344459
-4.58122	-0.620227	0.580039	-0.15713	-0.677914	0.357116	0.0651805	-0.220239	-0.537896	-0.142388	0.266928	-0.614839	0.1385	0.0163143	-0.345794	-0.0538873	0.170396	0.0248958	-0.00193068	0.757386	-0.601529	-0.401883	-0.386212	0.0542446	0.184226	0.260239	0.448008	-0.458147	0.495982	0.412633	-0.147433	0.173332	0.674985	0.415137	0.454347	0.0655605	-0.257048	-0.302833	-0.420353	0.180095	0.0400653	-0.103574	-0.416469	0.18922	-0.597702	-0.0586634	-0.333055	0.251341	0.158936	-0.345221
-4.58024	-0.619419	0.581604	-0.157476	-0.678804	0.355505	0.063567	-0.218506	-0.537906	-0.143128	0.270516	-0.613842	0.13914	0.0163231	-0.34612	-0.0526173	0.170218	0.0259445	-0.000774648	0.75694	-0.602218	-0.403094	-0.383982	0.05516	0.183431	0.261607	0.448656	-0.45793	0.494974	0.415042	-0.146836	0.173013	0.675912	0.415871	0.454435	0.0666531	-0.256174	-0.304552	-0.420776	0.178947	0.0390435	-0.104796	-0.415947	0.188404	-0.598084	-0.0595235	-0.33215	0.251084	0.15837	-0.34598
-4.57926	-0.618614	0.583156	-0.157843	-0.679689	0.3539	0.0619553	-0.216752	-0.537923	-0.143856	0.274122	-0.612843	0.139772	0.0163277	-0.346446	-0.0513559	0.170041	0.0270139	0.000386756	0.756482	-0.602905	-0.4043	-0.381752	0.0560736	0.182623	0.262971	0.449309	-0.457709	0.493951	0.417441	-0.146238	0.172702	0.676844	0.416583	0.45451	0.067743	-0.255308	-0.306276	-0.421187	0.177787	0.0380316	-0.106014	-0.41542	0.18758	-0.598454	-0.0603741	-0.331252	0.250853	0.157802	-0.346738
-4.57828	-0.617811	0.584694	-0.15823	-0.680568	0.352301	0.0603453	-0.214977	-0.537949	-0.144573	0.277745	-0.611843	0.140396	0.0163281	-0.346771	-0.0501031	0.169865	0.028104	0.00155351	0.756011	-0.603589	-0.405501	-0.379523	0.0569852	0.181801	0.264329	0.449967	-0.457483	0.492915	0.419831	-0.14564	0.172398	0.677781	0.417274	0.454571	0.0688302	-0.25445	-0.308004	-0.421584	0.176613	0.0370298	-0.107228	-0.414887	0.186747	-0.598812	-0.0612154	-0.33036	0.250646	0.157232	-0.347495
-4.57729	-0.617011	0.586218	-0.158638	-0.681442	0.350709	0.0587372	-0.213181	-0.537983	-0.145279	0.281385	-0.610842	0.14101	0.0163242	-0.347095	-0.0488592	0.16969	0.0292146	0.00272559	0.755528	-0.604272	-0.406695	-0.377296	0.0578948	0.180967	0.265683	0.450628	-0.457253	0.491864	0.422211	-0.145041	0.172102	0.678722	0.417944	0.454618	0.0699145	-0.253601	-0.309735	-0.421967	0.175425	0.0360381	-0.108438	-0.414349	0.185905	-0.599157	-0.0620473	-0.329475	0.250465	0.156659	-0.34825
-4.57631	-0.616213	0.587728	-0.159066	-0.682311	0.349124	0.0571309	-0.211364	-0.538025	-0.145973	0.285041	-0.60984	0.141616	0.0163159	-0.347418	-0.0476244	0.169516	0.0303456	0.00390298	0.755033	-0.604952	-0.407883	-0.375069	0.0588025	0.180119	0.267032	0.451294	-0.457019	0.490799	0.424581	-0.144443	0.171813	0.679668	0.418591	0.454651	0.0709959	-0.252761	-0.31147	-0.422337	0.174225	0.0350567	-0.109643	-0.413807	0.185055	-0.599491	-0.06287	-0.328598	0.250309	0.156083	-0.349003
-4.57533	-0.615418	0.589224	-0.159514	-0.683175	0.347545	0.0555265	-0.209526	-0.538074	-0.146656	0.288714	-0.608838	0.142212	0.0163033	-0.34774	-0.0463989	0.169342	0.0314969	0.00508565	0.754527	-0.60563	-0.409065	-0.372845	0.0597082	0.179259	0.268375	0.451964	-0.456781	0.48972	0.42694	-0.143844	0.171532	0.680618	0.419217	0.45467	0.0720741	-0.251929	-0.313209	-0.422693	0.173012	0.0340857	-0.110844	-0.413259	0.184196	-0.599813	-0.0636836	-0.327726	0.250178	0.155505	-0.349755
-4.57434	-0.614626	0.590706	-0.159983	-0.684033	0.345974	0.0539239	-0.207668	-0.538132	-0.147327	0.292402	-0.607835	0.1428	0.0162864	-0.348061	-0.045183	0.169169	0.0326685	0.00627358	0.754009	-0.606305	-0.410241	-0.370622	0.0606118	0.178386	0.269714	0.452638	-0.456539	0.488627	0.429289	-0.143245	0.171259	0.681571	0.419821	0.454676	0.0731492	-0.251107	-0.31495	-0.423036	0.171785	0.0331252	-0.11204	-0.412706	0.183329	-0.600123	-0.064488	-0.326862	0.250072	0.154924	-0.350504
-4.57336	-0.613837	0.592173	-0.160472	-0.684886	0.344409	0.0523232	-0.205789	-0.538198	-0.147987	0.296107	-0.606831	0.143378	0.016265	-0.348381	-0.0439767	0.168996	0.0338602	0.00746673	0.75348	-0.606978	-0.411409	-0.368401	0.0615133	0.177501	0.271048	0.453316	-0.456293	0.48752	0.431628	-0.142646	0.170994	0.682528	0.420403	0.454667	0.074221	-0.250293	-0.316694	-0.423364	0.170546	0.0321752	-0.11323	-0.412149	0.182454	-0.60042	-0.0652834	-0.326004	0.249992	0.154341	-0.351252
-4.57238	-0.61305	0.593626	-0.16098	-0.685733	0.342852	0.0507244	-0.20389	-0.538272	-0.148635	0.299827	-0.605826	0.143947	0.0162391	-0.3487	-0.0427805	0.168824	0.0350719	0.0086651	0.752939	-0.607649	-0.412571	-0.366183	0.0624128	0.176604	0.272377	0.453997	-0.456044	0.486399	0.433955	-0.142047	0.170737	0.683488	0.420963	0.454645	0.0752893	-0.249488	-0.318441	-0.423678	0.169294	0.0312359	-0.114416	-0.411587	0.181571	-0.600706	-0.0660699	-0.325153	0.249936	0.153755	-0.351997
-4.57139	-0.612266	0.595064	-0.161508	-0.686574	0.341302	0.0491276	-0.201972	-0.538354	-0.149272	0.303562	-0.604821	0.144507	0.0162088	-0.349017	-0.0415943	0.168651	0.0363036	0.00986864	0.752387	-0.608317	-0.413726	-0.363968	0.0633101	0.175694	0.2737	0.454683	-0.455791	0.485265	0.436271	-0.141448	0.170488	0.684451	0.421501	0.454609	0.0763542	-0.248692	-0.32019	-0.423978	0.168029	0.0303074	-0.115596	-0.411021	0.18068	-0.600979	-0.0668475	-0.324309	0.249906	0.153167	-0.352741
-4.57041	-0.611486	0.596487	-0.162057	-0.68741	0.339759	0.0475327	-0.200033	-0.538444	-0.149898	0.307312	-0.603816	0.145057	0.016174	-0.349333	-0.0404185	0.168479	0.037555	0.0110773	0.751825	-0.608983	-0.414873	-0.361755	0.0642053	0.174773	0.275019	0.455372	-0.455535	0.484116	0.438576	-0.140849	0.170247	0.685416	0.422018	0.454559	0.0774154	-0.247906	-0.321941	-0.424264	0.166751	0.0293898	-0.116771	-0.41045	0.179781	-0.60124	-0.0676163	-0.323472	0.249901	0.152576	-0.353482
-4.56943	-0.610708	0.597895	-0.162624	-0.68824	0.338224	0.0459398	-0.198074	-0.538542	-0.150512	0.311078	-0.60281	0.145598	0.0161346	-0.349648	-0.0392533	0.168306	0.0388261	0.0122911	0.751251	-0.609646	-0.416014	-0.359546	0.0650983	0.17384	0.276332	0.456065	-0.455276	0.482955	0.44087	-0.140249	0.170014	0.686384	0.422512	0.454495	0.078473	-0.24713	-0.323694	-0.424535	0.16546	0.0284831	-0.11794	-0.409874	0.178875	-0.601488	-0.0683764	-0.322642	0.249922	0.151983	-0.354221
-4.56845	-0.609933	0.599288	-0.163212	-0.689064	0.336697	0.0443488	-0.196096	-0.538648	-0.151115	0.314858	-0.601804	0.146129	0.0160907	-0.349961	-0.0380988	0.168133	0.0401168	0.01351	0.750668	-0.610307	-0.417146	-0.35734	0.0659891	0.172895	0.27764	0.456761	-0.455013	0.481779	0.443151	-0.139649	0.16979	0.687355	0.422985	0.454417	0.0795267	-0.246363	-0.325449	-0.424792	0.164158	0.0275875	-0.119103	-0.409295	0.177961	-0.601725	-0.0691279	-0.321818	0.249967	0.151388	-0.354958
-4.56746	-0.609161	0.600666	-0.163818	-0.689883	0.335178	0.0427599	-0.194099	-0.538763	-0.151707	0.318652	-0.600798	0.14665	0.0160421	-0.350272	-0.0369553	0.16796	0.041427	0.014734	0.750074	-0.610965	-0.418271	-0.355138	0.0668776	0.171939	0.278943	0.457461	-0.454747	0.480591	0.445421	-0.13905	0.169574	0.688327	0.423435	0.454325	0.0805764	-0.245605	-0.327205	-0.425034	0.162842	0.026703	-0.12026	-0.408711	0.17704	-0.601948	-0.0698708	-0.321002	0.250038	0.15079	-0.355692
-4.56648	-0.608392	0.602028	-0.164444	-0.690696	0.333667	0.041173	-0.192083	-0.538885	-0.152287	0.322461	-0.599791	0.147162	0.015989	-0.350582	-0.035823	0.167786	0.0427565	0.015963	0.74947	-0.61162	-0.419388	-0.35294	0.0677639	0.170972	0.280241	0.458164	-0.454479	0.479388	0.447678	-0.13845	0.169366	0.6893	0.423864	0.454219	0.0816222	-0.244858	-0.328962	-0.425262	0.161514	0.0258297	-0.121412	-0.408123	0.176111	-0.60216	-0.0706053	-0.320192	0.250134	0.15019	-0.356424
-4.5655	-0.607627	0.603375	-0.16509	-0.691502	0.332164	0.0395882	-0.190048	-0.539016	-0.152856	0.326283	-0.598785	0.147663	0.0159312	-0.350889	-0.0347021	0.167611	0.0441051	0.0171969	0.748856	-0.612273	-0.420497	-0.350746	0.0686478	0.169994	0.281533	0.45887	-0.454207	0.478173	0.449923	-0.13785	0.169167	0.690275	0.424271	0.454098	0.0826638	-0.24412	-0.330721	-0.425474	0.160174	0.0249678	-0.122557	-0.407531	0.175176	-0.602359	-0.0713314	-0.319389	0.250255	0.149587	-0.357153
-4.56451	-0.606864	0.604706	-0.165754	-0.692303	0.330669	0.0380054	-0.187994	-0.539155	-0.153413	0.330119	-0.597778	0.148155	0.0158688	-0.351195	-0.0335927	0.167436	0.0454729	0.0184359	0.748232	-0.612923	-0.421598	-0.348556	0.0695295	0.169005	0.28282	0.45958	-0.453933	0.476945	0.452155	-0.137249	0.168976	0.691251	0.424656	0.453964	0.0837012	-0.243393	-0.33248	-0.425672	0.158822	0.0241173	-0.123695	-0.406935	0.174234	-0.602546	-0.0720493	-0.318592	0.250401	0.148982	-0.35788
-4.56353	-0.606105	0.60602	-0.166437	-0.693098	0.329183	0.0364247	-0.185922	-0.539302	-0.15396	0.333968	-0.596772	0.148636	0.0158017	-0.351499	-0.0324951	0.167259	0.0468597	0.0196797	0.747598	-0.61357	-0.42269	-0.346371	0.0704088	0.168006	0.284102	0.460293	-0.453656	0.475703	0.454375	-0.136649	0.168795	0.692228	0.425018	0.453815	0.0847343	-0.242676	-0.33424	-0.425855	0.157458	0.0232782	-0.124827	-0.406335	0.173285	-0.60272	-0.072759	-0.317803	0.250573	0.148375	-0.358604
-4.56255	-0.605349	0.607319	-0.167139	-0.693887	0.327705	0.0348461	-0.183831	-0.539458	-0.154495	0.33783	-0.595765	0.149107	0.0157298	-0.351801	-0.0314095	0.167082	0.0482653	0.0209284	0.746956	-0.614214	-0.423774	-0.344192	0.0712857	0.166997	0.285378	0.461009	-0.453377	0.474449	0.456581	-0.136049	0.168621	0.693205	0.425359	0.453653	0.0857629	-0.241969	-0.336001	-0.426022	0.156081	0.0224507	-0.125953	-0.405732	0.172329	-0.602882	-0.0734606	-0.31702	0.250769	0.147766	-0.359325
-4.56156	-0.604597	0.608602	-0.16786	-0.694669	0.326237	0.0332697	-0.181723	-0.539621	-0.155019	0.341706	-0.594759	0.149568	0.0156533	-0.3521	-0.0303361	0.166903	0.0496895	0.022182	0.746304	-0.614856	-0.424849	-0.342017	0.0721601	0.165977	0.286649	0.461728	-0.453095	0.473181	0.458774	-0.135448	0.168457	0.694182	0.425678	0.453476	0.086787	-0.241272	-0.337761	-0.426174	0.154693	0.0216349	-0.127071	-0.405124	0.171367	-0.603031	-0.0741542	-0.316245	0.250991	0.147154	-0.360043
-4.56058	-0.603848	0.609868	-0.168599	-0.695445	0.324777	0.0316954	-0.179596	-0.539793	-0.155531	0.345593	-0.593754	0.150019	0.015572	-0.352398	-0.029275	0.166723	0.0511324	0.0234404	0.745643	-0.615494	-0.425915	-0.339848	0.0730322	0.164947	0.287915	0.46245	-0.452811	0.471901	0.460954	-0.134848	0.168302	0.69516	0.425974	0.453285	0.0878064	-0.240586	-0.339522	-0.426311	0.153293	0.0208308	-0.128183	-0.404513	0.170399	-0.603168	-0.0748399	-0.315476	0.251238	0.14654	-0.360758
-4.5596	-0.603102	0.611118	-0.169357	-0.696215	0.323326	0.0301234	-0.177452	-0.539973	-0.156033	0.349493	-0.592748	0.150459	0.0154859	-0.352693	-0.0282266	0.166542	0.0525937	0.0247036	0.744973	-0.61613	-0.426971	-0.337685	0.0739017	0.163908	0.289175	0.463175	-0.452525	0.470608	0.46312	-0.134247	0.168155	0.696137	0.426249	0.453079	0.0888211	-0.239911	-0.341282	-0.426433	0.151881	0.0200385	-0.129287	-0.403899	0.169424	-0.603292	-0.0755179	-0.314714	0.25151	0.145924	-0.361471
-4.55862	-0.60236	0.612351	-0.170133	-0.696979	0.321884	0.0285535	-0.175291	-0.540162	-0.156523	0.353405	-0.591743	0.150888	0.0153951	-0.352985	-0.0271908	0.166359	0.0540733	0.0259714	0.744295	-0.616762	-0.428019	-0.335528	0.0747688	0.162859	0.290429	0.463902	-0.452237	0.469303	0.465272	-0.133646	0.168018	0.697113	0.426501	0.45286	0.089831	-0.239246	-0.343042	-0.426539	0.150457	0.0192581	-0.130384	-0.403281	0.168444	-0.603403	-0.0761882	-0.313958	0.251807	0.145305	-0.36218
-4.55763	-0.601622	0.613568	-0.170927	-0.697737	0.320452	0.0269858	-0.173112	-0.540358	-0.157002	0.357329	-0.590738	0.151308	0.0152994	-0.353275	-0.0261681	0.166174	0.0555711	0.027244	0.743609	-0.617392	-0.429057	-0.333377	0.0756333	0.161801	0.291678	0.464632	-0.451947	0.467985	0.46741	-0.133045	0.16789	0.698089	0.426731	0.452626	0.0908359	-0.238593	-0.344801	-0.42663	0.149022	0.0184896	-0.131474	-0.40266	0.167457	-0.603503	-0.0768508	-0.31321	0.252129	0.144685	-0.362886
-4.55665	-0.600887	0.614767	-0.171739	-0.698487	0.319029	0.0254204	-0.170916	-0.540563	-0.15747	0.361264	-0.589734	0.151716	0.015199	-0.353563	-0.0251585	0.165987	0.0570869	0.0285212	0.742914	-0.618018	-0.430086	-0.331233	0.0764952	0.160733	0.292922	0.465365	-0.451655	0.466654	0.469534	-0.132444	0.167771	0.699063	0.42694	0.452377	0.0918358	-0.23795	-0.346559	-0.426705	0.147575	0.0177331	-0.132556	-0.402036	0.166465	-0.603589	-0.0775061	-0.312468	0.252476	0.144062	-0.363588
-4.55567	-0.600156	0.61595	-0.172569	-0.699232	0.317615	0.0238572	-0.168703	-0.540777	-0.157927	0.36521	-0.588731	0.152113	0.0150938	-0.353848	-0.0241622	0.165799	0.0586206	0.029803	0.742211	-0.618642	-0.431104	-0.329095	0.0773546	0.159657	0.29416	0.466101	-0.451362	0.465312	0.471643	-0.131843	0.167661	0.700036	0.427126	0.452115	0.0928305	-0.237318	-0.348315	-0.426764	0.146117	0.0169886	-0.13363	-0.401408	0.165467	-0.603663	-0.0781539	-0.311733	0.252848	0.143437	-0.364288
-4.55468	-0.599428	0.617115	-0.173417	-0.69997	0.316211	0.0222964	-0.166474	-0.540998	-0.158372	0.369167	-0.587728	0.1525	0.0149837	-0.35413	-0.0231795	0.165608	0.060172	0.0310894	0.7415	-0.619262	-0.432113	-0.326965	0.0782113	0.158572	0.295392	0.466839	-0.451067	0.463957	0.473737	-0.131242	0.167561	0.701007	0.42729	0.451838	0.09382	-0.236698	-0.350071	-0.426807	0.144648	0.0162564	-0.134697	-0.400778	0.164463	-0.603724	-0.0787945	-0.311005	0.253245	0.14281	-0.364984
-4.5537	-0.598704	0.618264	-0.174282	-0.700701	0.314817	0.0207379	-0.164229	-0.541228	-0.158807	0.373135	-0.586726	0.152876	0.0148688	-0.354409	-0.0222105	0.165415	0.061741	0.0323803	0.740782	-0.619879	-0.433112	-0.324842	0.0790654	0.157478	0.296618	0.467579	-0.45077	0.46259	0.475817	-0.130641	0.16747	0.701976	0.427432	0.451546	0.0948042	-0.236089	-0.351825	-0.426835	0.143167	0.0155363	-0.135755	-0.400144	0.163454	-0.603773	-0.0794279	-0.310284	0.253667	0.14218	-0.365676
-4.55272	-0.597984	0.619394	-0.175165	-0.701426	0.313433	0.0191817	-0.161967	-0.541466	-0.159231	0.377113	-0.585725	0.153241	0.014749	-0.354685	-0.0212554	0.16522	0.0633275	0.0336756	0.740056	-0.620493	-0.4341	-0.322726	0.0799168	0.156377	0.297839	0.468322	-0.450473	0.461211	0.477882	-0.13004	0.167388	0.702943	0.427552	0.451241	0.095783	-0.235491	-0.353577	-0.426846	0.141676	0.0148285	-0.136805	-0.399508	0.16244	-0.603809	-0.0800543	-0.309569	0.254114	0.141549	-0.366365
-4.55173	-0.597268	0.620508	-0.176066	-0.702144	0.312059	0.0176279	-0.159689	-0.541712	-0.159644	0.381101	-0.584725	0.153595	0.0146243	-0.354958	-0.0203144	0.165022	0.0649313	0.0349753	0.739323	-0.621103	-0.435078	-0.320618	0.0807655	0.155267	0.299054	0.469066	-0.450174	0.459821	0.479931	-0.129439	0.167317	0.703907	0.42765	0.45092	0.0967562	-0.234905	-0.355327	-0.426842	0.140173	0.014133	-0.137848	-0.398868	0.16142	-0.603833	-0.0806737	-0.308861	0.254585	0.140916	-0.36705
-4.55075	-0.596556	0.621603	-0.176983	-0.702856	0.310695	0.0160764	-0.157396	-0.541966	-0.160045	0.385098	-0.583725	0.153937	0.0144948	-0.355228	-0.0193877	0.164822	0.0665523	0.0362795	0.738583	-0.62171	-0.436045	-0.318518	0.0816114	0.154149	0.300264	0.469813	-0.449874	0.458419	0.481965	-0.128838	0.167254	0.704868	0.427725	0.450586	0.0977238	-0.234331	-0.357075	-0.426822	0.13866	0.0134499	-0.138881	-0.398226	0.160396	-0.603843	-0.0812864	-0.30816	0.255082	0.14028	-0.367732
-4.54977	-0.595848	0.622681	-0.177918	-0.70356	0.309341	0.0145274	-0.155087	-0.542229	-0.160436	0.389105	-0.582727	0.154269	0.0143605	-0.355495	-0.0184755	0.164619	0.0681902	0.0375879	0.737837	-0.622314	-0.437001	-0.316427	0.0824545	0.153024	0.301468	0.470563	-0.449573	0.457005	0.483983	-0.128236	0.167202	0.705826	0.427779	0.450236	0.0986856	-0.233768	-0.358821	-0.426785	0.137136	0.0127793	-0.139907	-0.397582	0.159367	-0.603842	-0.0818923	-0.307465	0.255603	0.139643	-0.368409
-4.54878	-0.595144	0.623741	-0.178869	-0.704258	0.307998	0.0129808	-0.152763	-0.5425	-0.160816	0.393121	-0.58173	0.154589	0.0142212	-0.355758	-0.0175779	0.164413	0.069845	0.0389006	0.737083	-0.622914	-0.437947	-0.314344	0.0832949	0.151892	0.302666	0.471314	-0.449271	0.455579	0.485985	-0.127635	0.167159	0.706781	0.427811	0.449873	0.0996417	-0.233217	-0.360564	-0.426732	0.135602	0.0121211	-0.140923	-0.396935	0.158333	-0.603827	-0.0824916	-0.306778	0.256149	0.139003	-0.369083
-4.5478	-0.594444	0.624783	-0.179837	-0.704949	0.306665	0.0114367	-0.150425	-0.542779	-0.161186	0.397146	-0.580733	0.154897	0.0140771	-0.356018	-0.0166951	0.164204	0.0715165	0.0402175	0.736323	-0.623511	-0.438881	-0.312269	0.0841324	0.150752	0.303858	0.472067	-0.448969	0.454143	0.487971	-0.127033	0.167126	0.707732	0.42782	0.449494	0.100592	-0.232677	-0.362304	-0.426663	0.134057	0.0114755	-0.141931	-0.396285	0.157294	-0.6038	-0.0830845	-0.306097	0.256719	0.138362	-0.369753
-4.54682	-0.593748	0.625806	-0.180822	-0.705633	0.305343	0.00989506	-0.148071	-0.543066	-0.161544	0.401179	-0.579739	0.155195	0.0139281	-0.356274	-0.0158274	0.163993	0.0732046	0.0415386	0.735557	-0.624104	-0.439804	-0.310204	0.084967	0.149605	0.305044	0.472822	-0.448666	0.452695	0.489941	-0.126432	0.167102	0.708679	0.427808	0.449102	0.101536	-0.23215	-0.36404	-0.426578	0.132502	0.0108425	-0.14293	-0.395633	0.156251	-0.603761	-0.083671	-0.305422	0.257314	0.137718	-0.370419
-4.54584	-0.593056	0.626812	-0.181823	-0.70631	0.304031	0.00835594	-0.145703	-0.543362	-0.161892	0.40522	-0.578745	0.155481	0.0137742	-0.356527	-0.0149749	0.163778	0.074909	0.0428638	0.734785	-0.624694	-0.440716	-0.308148	0.0857988	0.148452	0.306225	0.473579	-0.448363	0.451236	0.491894	-0.12583	0.167089	0.709622	0.427773	0.448694	0.102474	-0.231635	-0.365774	-0.426476	0.130936	0.0102221	-0.14392	-0.394979	0.155204	-0.603708	-0.0842513	-0.304755	0.257934	0.137073	-0.371081
-4.54485	-0.592368	0.627799	-0.182841	-0.706979	0.302731	0.00681936	-0.14332	-0.543665	-0.162229	0.40927	-0.577753	0.155755	0.0136154	-0.356777	-0.0141377	0.16356	0.0766296	0.044193	0.734007	-0.62528	-0.441616	-0.306101	0.0866276	0.147292	0.307399	0.474337	-0.448059	0.449766	0.493831	-0.125229	0.167086	0.71056	0.427716	0.448272	0.103406	-0.231132	-0.367504	-0.426358	0.129361	0.00961443	-0.144901	-0.394322	0.154153	-0.603643	-0.0848255	-0.304094	0.258578	0.136426	-0.371739
-4.54387	-0.591685	0.628767	-0.183874	-0.707642	0.301441	0.00528534	-0.140924	-0.543977	-0.162555	0.413326	-0.576762	0.156017	0.0134517	-0.357022	-0.0133161	0.163338	0.0783663	0.0455263	0.733223	-0.625863	-0.442504	-0.304064	0.0874534	0.146126	0.308568	0.475097	-0.447755	0.448285	0.495751	-0.124627	0.167093	0.711494	0.427638	0.447836	0.104331	-0.230642	-0.369231	-0.426223	0.127775	0.00901947	-0.145872	-0.393664	0.153097	-0.603566	-0.0853937	-0.303439	0.259247	0.135777	-0.372392
-4.54289	-0.591006	0.629717	-0.184924	-0.708298	0.300163	0.00375391	-0.138514	-0.544297	-0.162871	0.41739	-0.575772	0.156268	0.0132832	-0.357264	-0.0125101	0.163113	0.0801189	0.0468634	0.732434	-0.626441	-0.443381	-0.302037	0.0882763	0.144953	0.309731	0.475859	-0.447451	0.446793	0.497654	-0.124025	0.16711	0.712422	0.427537	0.447384	0.105251	-0.230163	-0.370954	-0.426072	0.12618	0.00843729	-0.146834	-0.393003	0.152038	-0.603476	-0.085956	-0.302792	0.25994	0.135125	-0.373042
-4.5419	-0.590331	0.630649	-0.185989	-0.708946	0.298895	0.00222509	-0.13609	-0.544625	-0.163176	0.421461	-0.574784	0.156508	0.0131097	-0.357501	-0.0117201	0.162884	0.0818873	0.0482045	0.731639	-0.627016	-0.444245	-0.300021	0.0890961	0.143775	0.310888	0.476622	-0.447147	0.445291	0.49954	-0.123424	0.167137	0.713345	0.427414	0.446919	0.106163	-0.229697	-0.372672	-0.425905	0.124575	0.00786791	-0.147787	-0.39234	0.150974	-0.603373	-0.0865126	-0.30215	0.260658	0.134473	-0.373687
-4.54092	-0.589661	0.631561	-0.18707	-0.709587	0.297639	0.000698917	-0.133653	-0.544962	-0.16347	0.425538	-0.573798	0.156735	0.0129314	-0.357735	-0.0109462	0.162652	0.0836712	0.0495494	0.73084	-0.627588	-0.445097	-0.298014	0.0899129	0.142592	0.312038	0.477387	-0.446844	0.443778	0.501408	-0.122822	0.167174	0.714262	0.42727	0.446438	0.107069	-0.229244	-0.374386	-0.42572	0.12296	0.0073114	-0.14873	-0.391676	0.149908	-0.603258	-0.0870636	-0.301516	0.261399	0.133818	-0.374327
-4.53994	-0.588995	0.632454	-0.188167	-0.710221	0.296394	-0.00082459	-0.131203	-0.545306	-0.163754	0.429622	-0.572813	0.15695	0.0127483	-0.357964	-0.0101884	0.162415	0.0854705	0.050898	0.730035	-0.628155	-0.445937	-0.296019	0.0907266	0.141403	0.313183	0.478153	-0.44654	0.442255	0.503259	-0.12222	0.167222	0.715173	0.427103	0.445943	0.107969	-0.228803	-0.376096	-0.425519	0.121336	0.00676776	-0.149663	-0.39101	0.148837	-0.60313	-0.0876091	-0.300888	0.262165	0.133161	-0.374963
-4.53895	-0.588334	0.633329	-0.189279	-0.710848	0.295161	-0.0023454	-0.12874	-0.545658	-0.164028	0.433712	-0.57183	0.157154	0.0125602	-0.35819	-0.00944712	0.162175	0.087285	0.0522504	0.729226	-0.628719	-0.446764	-0.294034	0.0915371	0.140209	0.314322	0.478921	-0.446237	0.440722	0.505092	-0.121618	0.16728	0.716078	0.426914	0.445433	0.108862	-0.228375	-0.377801	-0.425302	0.119703	0.00623705	-0.150586	-0.390342	0.147763	-0.602989	-0.0881493	-0.300266	0.262955	0.132503	-0.375594
-4.53797	-0.587678	0.634184	-0.190406	-0.711467	0.29394	-0.0038635	-0.126265	-0.546019	-0.164291	0.437807	-0.570849	0.157346	0.0123673	-0.358411	-0.00872236	0.161931	0.0891146	0.0536064	0.728413	-0.629279	-0.447578	-0.29206	0.0923446	0.13901	0.315455	0.479689	-0.445935	0.439179	0.506907	-0.121017	0.167348	0.716977	0.426704	0.444908	0.109748	-0.22796	-0.379501	-0.425067	0.11806	0.0057193	-0.1515	-0.389672	0.146686	-0.602836	-0.0886842	-0.299651	0.26377	0.131842	-0.376221
-4.53699	-0.587026	0.63502	-0.191548	-0.712078	0.29273	-0.00537884	-0.123777	-0.546387	-0.164544	0.441907	-0.56987	0.157525	0.0121696	-0.358627	-0.00801432	0.161682	0.0909591	0.054966	0.727595	-0.629834	-0.448379	-0.290098	0.0931488	0.137807	0.316582	0.480459	-0.445633	0.437626	0.508705	-0.120415	0.167427	0.717869	0.426471	0.444369	0.110627	-0.227558	-0.381196	-0.424816	0.116409	0.00521453	-0.152403	-0.389001	0.145606	-0.60267	-0.089214	-0.299043	0.264608	0.13118	-0.376843
-4.53601	-0.586379	0.635836	-0.192705	-0.712683	0.291531	-0.00689141	-0.121277	-0.546763	-0.164787	0.446013	-0.568892	0.157693	0.011967	-0.358839	-0.00732318	0.16143	0.0928183	0.0563291	0.726773	-0.630386	-0.449168	-0.288147	0.0939498	0.136599	0.317702	0.48123	-0.445332	0.436063	0.510483	-0.119813	0.167517	0.718754	0.426217	0.443815	0.111499	-0.227168	-0.382886	-0.424548	0.114748	0.00472277	-0.153296	-0.388329	0.144522	-0.602492	-0.0897388	-0.298441	0.26547	0.130517	-0.377461
-4.53502	-0.585736	0.636633	-0.193877	-0.713279	0.290345	-0.00840118	-0.118766	-0.547148	-0.16502	0.450123	-0.567916	0.157848	0.0117596	-0.359047	-0.00664909	0.161172	0.0946921	0.0576956	0.725947	-0.630934	-0.449943	-0.286208	0.0947476	0.135387	0.318817	0.482002	-0.445032	0.43449	0.512244	-0.119211	0.167617	0.719631	0.42594	0.443246	0.112364	-0.226791	-0.38457	-0.424263	0.113079	0.00424405	-0.154179	-0.387655	0.143436	-0.602301	-0.0902588	-0.297845	0.266356	0.129851	-0.378073
-4.53404	-0.585099	0.637411	-0.195063	-0.713868	0.289171	-0.00990812	-0.116243	-0.54754	-0.165242	0.454237	-0.566943	0.157991	0.0115474	-0.35925	-0.00599221	0.160911	0.0965802	0.0590656	0.725117	-0.631478	-0.450705	-0.284281	0.0955421	0.134172	0.319925	0.482775	-0.444733	0.432908	0.513986	-0.118609	0.167727	0.720501	0.425642	0.442662	0.113221	-0.226428	-0.386249	-0.423962	0.111402	0.0037784	-0.155051	-0.38698	0.142347	-0.602098	-0.090774	-0.297256	0.267266	0.129184	-0.378681
-4.53306	-0.584466	0.638168	-0.196264	-0.71445	0.288009	-0.0114122	-0.113709	-0.54794	-0.165454	0.458356	-0.565971	0.158122	0.0113304	-0.359448	-0.00535269	0.160644	0.0984825	0.0604388	0.724284	-0.632017	-0.451453	-0.282366	0.0963334	0.132952	0.321028	0.483549	-0.444435	0.431316	0.515709	-0.118007	0.167849	0.721363	0.425322	0.442064	0.114072	-0.226078	-0.387921	-0.423643	0.109715	0.00332583	-0.155913	-0.386303	0.141255	-0.601883	-0.0912847	-0.296673	0.2682	0.128515	-0.379283
-4.53207	-0.583838	0.638906	-0.197479	-0.715023	0.286859	-0.0129134	-0.111163	-0.548348	-0.165656	0.462477	-0.565002	0.15824	0.0111086	-0.359641	-0.0047307	0.160373	0.100399	0.0618154	0.723448	-0.632553	-0.452188	-0.280464	0.0971212	0.131729	0.322124	0.484323	-0.444138	0.429715	0.517413	-0.117405	0.167981	0.722216	0.42498	0.441451	0.114915	-0.225741	-0.389588	-0.423308	0.108021	0.00288637	-0.156764	-0.385626	0.140161	-0.601655	-0.091791	-0.296096	0.269157	0.127845	-0.379881
-4.53109	-0.583215	0.639625	-0.198707	-0.715589	0.285721	-0.0144117	-0.108607	-0.548764	-0.165848	0.466603	-0.564035	0.158346	0.0108821	-0.359829	-0.00412639	0.160098	0.102329	0.0631951	0.722608	-0.633084	-0.452909	-0.278574	0.0979057	0.130504	0.323214	0.485099	-0.443843	0.428106	0.519098	-0.116803	0.168124	0.723062	0.424617	0.440823	0.115751	-0.225417	-0.391248	-0.422956	0.106318	0.00246003	-0.157605	-0.384948	0.139064	-0.601414	-0.0922929	-0.295526	0.270138	0.127173	-0.380473
-4.53011	-0.582597	0.640323	-0.19995	-0.716148	0.284596	-0.015907	-0.106041	-0.549188	-0.166031	0.470731	-0.56307	0.15844	0.0106507	-0.360012	-0.0035399	0.159817	0.104273	0.0645779	0.721766	-0.633611	-0.453616	-0.276697	0.0986868	0.129275	0.324298	0.485875	-0.443549	0.426487	0.520764	-0.116201	0.168278	0.723898	0.424232	0.44018	0.116579	-0.225106	-0.392902	-0.422587	0.104608	0.00204684	-0.158435	-0.384268	0.137965	-0.601161	-0.0927907	-0.294963	0.271142	0.126499	-0.381061
-4.52912	-0.581984	0.641001	-0.201206	-0.716698	0.283483	-0.0173994	-0.103464	-0.549619	-0.166203	0.474861	-0.562107	0.158521	0.0104147	-0.360191	-0.00297139	0.159531	0.10623	0.0659638	0.72092	-0.634133	-0.454309	-0.274833	0.0994645	0.128043	0.325375	0.486652	-0.443257	0.424859	0.52241	-0.115599	0.168443	0.724726	0.423824	0.439522	0.117399	-0.224809	-0.394549	-0.4222	0.102889	0.0016468	-0.159254	-0.383588	0.136864	-0.600896	-0.0932844	-0.294405	0.27217	0.125824	-0.381643
-4.52814	-0.581377	0.641659	-0.202476	-0.71724	0.282382	-0.0188888	-0.100877	-0.550058	-0.166366	0.478994	-0.561147	0.15859	0.0101739	-0.360364	-0.00242101	0.159241	0.108201	0.0673527	0.720073	-0.634651	-0.454988	-0.272983	0.100239	0.126809	0.326446	0.487429	-0.442967	0.423223	0.524037	-0.114997	0.168618	0.725544	0.423396	0.438849	0.118212	-0.224526	-0.396189	-0.421797	0.101163	0.00125994	-0.160061	-0.382907	0.135761	-0.600618	-0.0937743	-0.293854	0.273221	0.125147	-0.38222
-4.52716	-0.580774	0.642296	-0.203759	-0.717775	0.281295	-0.0203751	-0.0982806	-0.550505	-0.166518	0.483129	-0.560189	0.158646	0.00992849	-0.360531	-0.0018889	0.158945	0.110184	0.0687444	0.719223	-0.635165	-0.455653	-0.271146	0.101009	0.125573	0.327512	0.488207	-0.442678	0.421578	0.525644	-0.114395	0.168805	0.726353	0.422945	0.438162	0.119017	-0.224256	-0.397822	-0.421377	0.0994292	0.000886252	-0.160858	-0.382225	0.134656	-0.600328	-0.0942603	-0.293309	0.274295	0.124468	-0.382791
-4.52617	-0.580177	0.642914	-0.205055	-0.718302	0.280219	-0.0218584	-0.0956747	-0.550959	-0.166662	0.487266	-0.559234	0.15869	0.00967836	-0.360694	-0.0013752	0.158644	0.112181	0.0701391	0.71837	-0.635675	-0.456303	-0.269323	0.101777	0.124335	0.32857	0.488986	-0.442392	0.419925	0.527231	-0.113793	0.169003	0.727152	0.422473	0.43746	0.119814	-0.224	-0.399448	-0.42094	0.0976881	0.00052576	-0.161644	-0.381543	0.133549	-0.600026	-0.0947427	-0.29277	0.275392	0.123788	-0.383357
-4.52519	-0.579585	0.643511	-0.206365	-0.71882	0.279157	-0.0233386	-0.0930596	-0.551421	-0.166795	0.491403	-0.558281	0.158721	0.00942359	-0.360851	-0.000880063	0.158337	0.11419	0.0715364	0.717516	-0.63618	-0.456938	-0.267513	0.10254	0.123095	0.329623	0.489765	-0.442108	0.418264	0.528799	-0.113191	0.169211	0.727941	0.42198	0.436742	0.120604	-0.223757	-0.401067	-0.420487	0.0959397	0.000178466	-0.162418	-0.38086	0.13244	-0.599711	-0.0952217	-0.292238	0.276513	0.123107	-0.383917
-4.52421	-0.578998	0.644087	-0.207687	-0.719331	0.278108	-0.0248157	-0.0904356	-0.551891	-0.166919	0.495542	-0.557331	0.158739	0.00916418	-0.361002	-0.000403621	0.158025	0.116212	0.0729365	0.71666	-0.63668	-0.457559	-0.265718	0.1033	0.121854	0.330669	0.490544	-0.441825	0.416594	0.530346	-0.112589	0.169431	0.72872	0.421464	0.43601	0.121385	-0.223528	-0.402678	-0.420016	0.0941843	-0.000155625	-0.163181	-0.380176	0.13133	-0.599385	-0.0956972	-0.291711	0.277656	0.122424	-0.384472
-4.52323	-0.578417	0.644643	-0.209021	-0.719834	0.277071	-0.0262897	-0.0878029	-0.552368	-0.167034	0.499681	-0.556383	0.158745	0.00890018	-0.361148	5.39853e-05	0.157707	0.118246	0.0743391	0.715802	-0.637176	-0.458164	-0.263937	0.104056	0.120612	0.331709	0.491323	-0.441546	0.414917	0.531872	-0.111987	0.169662	0.729488	0.420928	0.435263	0.122158	-0.223313	-0.404281	-0.419528	0.0924219	-0.000476508	-0.163933	-0.379493	0.130218	-0.599046	-0.0961696	-0.291191	0.278822	0.121739	-0.385022
-4.52224	-0.577842	0.645179	-0.210368	-0.720328	0.276047	-0.0277605	-0.0851619	-0.552852	-0.167139	0.50382	-0.555438	0.158738	0.0086316	-0.361288	0.000492621	0.157384	0.120293	0.0757444	0.714943	-0.637668	-0.458755	-0.262171	0.104809	0.119369	0.332742	0.492103	-0.441268	0.413232	0.533378	-0.111385	0.169905	0.730246	0.42037	0.434501	0.122923	-0.223111	-0.405877	-0.419023	0.0906528	-0.000784181	-0.164673	-0.378809	0.129105	-0.598695	-0.0966389	-0.290677	0.280011	0.121053	-0.385566
-4.52126	-0.577271	0.645693	-0.211727	-0.720814	0.275037	-0.029228	-0.0825128	-0.553344	-0.167234	0.507959	-0.554496	0.158718	0.00835846	-0.361422	0.000912151	0.157055	0.122351	0.077152	0.714083	-0.638154	-0.45933	-0.260419	0.105558	0.118125	0.333769	0.492883	-0.440994	0.411539	0.534864	-0.110783	0.170158	0.730992	0.41979	0.433724	0.12368	-0.222924	-0.407464	-0.418501	0.0888772	-0.00107865	-0.165401	-0.378124	0.127991	-0.598331	-0.0971052	-0.290168	0.281223	0.120366	-0.386104
-4.52028	-0.576707	0.646187	-0.213099	-0.721292	0.274039	-0.0306924	-0.0798558	-0.553844	-0.167321	0.512098	-0.553557	0.158686	0.00808081	-0.36155	0.00131244	0.15672	0.124421	0.0785621	0.713221	-0.638636	-0.45989	-0.258683	0.106303	0.11688	0.33479	0.493663	-0.440721	0.409839	0.536328	-0.110181	0.170423	0.731727	0.419189	0.432933	0.124428	-0.22275	-0.409043	-0.417963	0.0870951	-0.0013599	-0.166118	-0.37744	0.126875	-0.597956	-0.0975687	-0.289666	0.282457	0.119677	-0.386636
-4.51929	-0.576148	0.64666	-0.214482	-0.721762	0.273055	-0.0321535	-0.0771913	-0.55435	-0.167398	0.516235	-0.55262	0.15864	0.00779866	-0.361673	0.00169337	0.15638	0.126503	0.0799744	0.712359	-0.639114	-0.460435	-0.256961	0.107045	0.115636	0.335805	0.494443	-0.440452	0.408132	0.537772	-0.109579	0.1707	0.73245	0.418567	0.432126	0.125168	-0.222591	-0.410613	-0.417407	0.0853068	-0.00162796	-0.166822	-0.376755	0.125759	-0.597569	-0.0980296	-0.28917	0.283714	0.118987	-0.387162
-4.51831	-0.575594	0.647112	-0.215877	-0.722224	0.272084	-0.0336113	-0.0745194	-0.554864	-0.167466	0.520372	-0.551686	0.158582	0.00751205	-0.361789	0.00205481	0.156033	0.128596	0.081389	0.711496	-0.639586	-0.460964	-0.255255	0.107783	0.114392	0.336813	0.495223	-0.440186	0.406417	0.539195	-0.108977	0.170987	0.733162	0.417923	0.431304	0.1259	-0.222445	-0.412175	-0.416835	0.0835124	-0.00188281	-0.167515	-0.376071	0.124642	-0.597169	-0.098488	-0.28868	0.284993	0.118295	-0.387683
-4.51733	-0.575047	0.647543	-0.217284	-0.722677	0.271127	-0.0350657	-0.0718406	-0.555385	-0.167525	0.524506	-0.550756	0.158511	0.00722101	-0.361899	0.00239662	0.15568	0.130701	0.0828057	0.710633	-0.640054	-0.461477	-0.253564	0.108517	0.113148	0.337814	0.496003	-0.439923	0.404696	0.540596	-0.108375	0.171286	0.733861	0.417258	0.430468	0.126623	-0.222314	-0.413727	-0.416245	0.0817121	-0.00212448	-0.168197	-0.375387	0.123524	-0.596758	-0.0989439	-0.288196	0.286294	0.117602	-0.388197
-4.51634	-0.574505	0.647952	-0.218701	-0.723122	0.270182	-0.0365168	-0.069155	-0.555913	-0.167576	0.528639	-0.549828	0.158427	0.00692557	-0.362003	0.00271869	0.155321	0.132816	0.0842245	0.709769	-0.640517	-0.461975	-0.251889	0.109247	0.111904	0.338809	0.496783	-0.439662	0.402967	0.541977	-0.107773	0.171597	0.734548	0.416572	0.429616	0.127337	-0.222197	-0.415271	-0.415639	0.079906	-0.00235297	-0.168866	-0.374702	0.122405	-0.596335	-0.0993977	-0.287717	0.287617	0.116908	-0.388706
-4.51536	-0.573969	0.648341	-0.22013	-0.723558	0.269252	-0.0379646	-0.0664629	-0.556448	-0.167617	0.53277	-0.548904	0.15833	0.00662576	-0.362101	0.0030209	0.154956	0.134942	0.0856453	0.708905	-0.640975	-0.462456	-0.250229	0.109973	0.110662	0.339798	0.497563	-0.439406	0.401232	0.543335	-0.10717	0.171919	0.735222	0.415864	0.42875	0.128042	-0.222094	-0.416806	-0.415016	0.0780944	-0.00256828	-0.169523	-0.374018	0.121285	-0.5959	-0.0998493	-0.287245	0.288963	0.116212	-0.389208
-4.51438	-0.573439	0.648709	-0.22157	-0.723986	0.268335	-0.0394089	-0.0637646	-0.55699	-0.167649	0.536898	-0.547982	0.15822	0.00632162	-0.362193	0.00330313	0.154584	0.137079	0.087068	0.708041	-0.641428	-0.462922	-0.248586	0.110695	0.109421	0.34078	0.498343	-0.439152	0.399491	0.544672	-0.106568	0.172252	0.735884	0.415136	0.427869	0.128739	-0.222005	-0.418331	-0.414376	0.0762774	-0.00277044	-0.170168	-0.373335	0.120165	-0.595453	-0.100299	-0.286778	0.29033	0.115515	-0.389704
-4.5134	-0.572915	0.649055	-0.223021	-0.724406	0.267431	-0.0408498	-0.0610604	-0.55754	-0.167673	0.541023	-0.547064	0.158097	0.00601318	-0.362277	0.00356526	0.154206	0.139227	0.0884925	0.707178	-0.641876	-0.463371	-0.246959	0.111413	0.108181	0.341756	0.499122	-0.438902	0.397743	0.545988	-0.105966	0.172597	0.736532	0.414386	0.426973	0.129427	-0.22193	-0.419847	-0.413719	0.0744552	-0.00295945	-0.1708	-0.372652	0.119045	-0.594994	-0.100747	-0.286317	0.291719	0.114817	-0.390194
-4.51241	-0.572396	0.64938	-0.224482	-0.724817	0.266541	-0.0422872	-0.0583505	-0.558096	-0.167688	0.545144	-0.546149	0.157961	0.00570048	-0.362356	0.00380718	0.153822	0.141384	0.0899187	0.706315	-0.642319	-0.463804	-0.245348	0.112127	0.106942	0.342725	0.499902	-0.438656	0.395989	0.547281	-0.105364	0.172954	0.737167	0.413616	0.426061	0.130106	-0.22187	-0.421353	-0.413046	0.0726279	-0.00313534	-0.171421	-0.371969	0.117925	-0.594524	-0.101193	-0.285862	0.29313	0.114117	-0.390678
-4.51143	-0.571884	0.649683	-0.225954	-0.725219	0.265665	-0.043721	-0.0556352	-0.558658	-0.167695	0.549262	-0.545237	0.157812	0.00538356	-0.362428	0.00402877	0.153431	0.143552	0.0913466	0.705452	-0.642757	-0.46422	-0.243754	0.112838	0.105706	0.343687	0.50068	-0.438413	0.394229	0.548553	-0.104762	0.173322	0.737789	0.412824	0.425135	0.130776	-0.221824	-0.422849	-0.412356	0.0707958	-0.00329813	-0.172029	-0.371287	0.116804	-0.594041	-0.101638	-0.285412	0.294562	0.113417	-0.391156
-4.51045	-0.571378	0.649965	-0.227436	-0.725613	0.264802	-0.0451514	-0.0529149	-0.559228	-0.167693	0.553375	-0.544329	0.15765	0.00506245	-0.362493	0.00422993	0.153033	0.145729	0.092776	0.70459	-0.64319	-0.46462	-0.242177	0.113544	0.104471	0.344644	0.501459	-0.438174	0.392463	0.549802	-0.10416	0.173702	0.738396	0.412011	0.424194	0.131437	-0.221793	-0.424336	-0.411649	0.068959	-0.00344782	-0.172624	-0.370605	0.115683	-0.593548	-0.102081	-0.284969	0.296016	0.112715	-0.391627
-4.50946	-0.570879	0.650226	-0.228928	-0.725999	0.263953	-0.0465782	-0.0501897	-0.559804	-0.167682	0.557485	-0.543424	0.157475	0.0047372	-0.362551	0.00441055	0.152629	0.147916	0.0942069	0.703729	-0.643617	-0.465003	-0.240616	0.114246	0.103239	0.345593	0.502237	-0.437939	0.390692	0.55103	-0.103558	0.174094	0.738989	0.411178	0.423238	0.132089	-0.221775	-0.425812	-0.410925	0.0671177	-0.00358445	-0.173208	-0.369924	0.114563	-0.593042	-0.102523	-0.28453	0.297491	0.112011	-0.392092
-4.50848	-0.570385	0.650465	-0.23043	-0.726375	0.263118	-0.0480013	-0.0474599	-0.560387	-0.167663	0.561589	-0.542522	0.157287	0.00440783	-0.362603	0.00457052	0.152218	0.150113	0.0956392	0.70287	-0.64404	-0.465369	-0.239073	0.114944	0.10201	0.346536	0.503015	-0.437708	0.388915	0.552235	-0.102956	0.174497	0.739569	0.410324	0.422267	0.132731	-0.221773	-0.427277	-0.410185	0.065272	-0.00370804	-0.173778	-0.369244	0.113442	-0.592525	-0.102964	-0.284098	0.298987	0.111307	-0.39255
-4.5075	-0.569898	0.650683	-0.231942	-0.726743	0.262297	-0.0494209	-0.0447259	-0.560977	-0.167636	0.565688	-0.541624	0.157086	0.00407441	-0.362648	0.00470975	0.1518	0.152318	0.0970728	0.702011	-0.644457	-0.465719	-0.237547	0.115638	0.100784	0.347473	0.503792	-0.437481	0.387133	0.553417	-0.102354	0.174913	0.740133	0.409449	0.421281	0.133364	-0.221784	-0.428733	-0.409429	0.0634223	-0.00381861	-0.174337	-0.368565	0.112322	-0.591997	-0.103404	-0.283671	0.300504	0.110601	-0.393002
-4.50651	-0.569417	0.650879	-0.233463	-0.727103	0.26149	-0.0508368	-0.0419879	-0.561573	-0.167601	0.569782	-0.540729	0.156872	0.00373696	-0.362686	0.00482812	0.151375	0.154533	0.0985077	0.701154	-0.644869	-0.466051	-0.236038	0.116327	0.0995608	0.348403	0.504569	-0.437259	0.385345	0.554577	-0.101752	0.175339	0.740683	0.408553	0.420281	0.133988	-0.22181	-0.430177	-0.408656	0.0615686	-0.00391619	-0.174882	-0.367887	0.111202	-0.591457	-0.103843	-0.28325	0.302042	0.109895	-0.393448
-4.50553	-0.568942	0.651053	-0.234993	-0.727453	0.260696	-0.0522489	-0.0392461	-0.562176	-0.167558	0.573869	-0.539838	0.156644	0.00339553	-0.362716	0.00492555	0.150943	0.156757	0.0999436	0.700299	-0.645276	-0.466366	-0.234547	0.117012	0.0983411	0.349326	0.505345	-0.43704	0.383553	0.555715	-0.10115	0.175778	0.741217	0.407637	0.419265	0.134603	-0.221851	-0.431611	-0.407866	0.0597111	-0.0040008	-0.175415	-0.36721	0.110083	-0.590906	-0.104281	-0.282834	0.303601	0.109187	-0.393886
-4.50455	-0.568474	0.651205	-0.236533	-0.727795	0.259917	-0.0536574	-0.0365009	-0.562784	-0.167507	0.577951	-0.538951	0.156404	0.00305016	-0.36274	0.00500194	0.150504	0.158989	0.101381	0.699445	-0.645678	-0.466664	-0.233074	0.117694	0.097125	0.350243	0.50612	-0.436827	0.381755	0.556829	-0.100548	0.176229	0.741737	0.4067	0.418234	0.135208	-0.221906	-0.433034	-0.40706	0.05785	-0.00407249	-0.175935	-0.366534	0.108964	-0.590343	-0.104719	-0.282423	0.30518	0.108478	-0.394319
-4.50356	-0.568013	0.651336	-0.238081	-0.728128	0.259152	-0.0550621	-0.0337525	-0.563399	-0.167448	0.582026	-0.538067	0.15615	0.0027009	-0.362756	0.0050572	0.150058	0.16123	0.102819	0.698593	-0.646074	-0.466945	-0.231618	0.11837	0.095913	0.351153	0.506895	-0.436617	0.379953	0.557921	-0.099946	0.176691	0.742241	0.405742	0.417189	0.135803	-0.221976	-0.434446	-0.406237	0.0559856	-0.00413128	-0.176443	-0.365859	0.107846	-0.589769	-0.105156	-0.282018	0.30678	0.107768	-0.394744
-4.50258	-0.567558	0.651445	-0.239638	-0.728452	0.258401	-0.056463	-0.0310013	-0.564021	-0.167381	0.586094	-0.537187	0.155884	0.00234779	-0.362765	0.00509122	0.149605	0.163479	0.104257	0.697744	-0.646465	-0.467208	-0.23018	0.119043	0.0947051	0.352056	0.507669	-0.436413	0.378146	0.55899	-0.099344	0.177165	0.742729	0.404764	0.416128	0.136389	-0.222061	-0.435846	-0.405399	0.0541179	-0.0041772	-0.176937	-0.365185	0.106728	-0.589184	-0.105593	-0.281619	0.308401	0.107056	-0.395163
-4.5016	-0.56711	0.651532	-0.241204	-0.728767	0.257664	-0.0578601	-0.0282474	-0.564648	-0.167307	0.590154	-0.536311	0.155604	0.00199089	-0.362767	0.00510394	0.149145	0.165735	0.105697	0.696896	-0.64685	-0.467453	-0.228761	0.119711	0.0935018	0.352953	0.508443	-0.436213	0.376335	0.560036	-0.098742	0.177651	0.743201	0.403766	0.415053	0.136965	-0.22216	-0.437235	-0.404544	0.0522472	-0.0042103	-0.177419	-0.364512	0.105612	-0.588588	-0.10603	-0.281224	0.310041	0.106344	-0.395575
-4.50062	-0.566668	0.651597	-0.242778	-0.729074	0.256941	-0.0592533	-0.0254911	-0.565282	-0.167224	0.594207	-0.535439	0.155311	0.00163024	-0.362762	0.00509526	0.148677	0.168	0.107137	0.696051	-0.64723	-0.467681	-0.22736	0.120375	0.0923031	0.353843	0.509215	-0.436018	0.37452	0.561058	-0.09814	0.178149	0.743657	0.402747	0.413963	0.137531	-0.222273	-0.438613	-0.403673	0.0503737	-0.0042306	-0.177888	-0.363841	0.104496	-0.587981	-0.106467	-0.280835	0.311702	0.105631	-0.39598
-4.49963	-0.566233	0.65164	-0.24436	-0.729372	0.256232	-0.0606426	-0.0227328	-0.565921	-0.167135	0.598252	-0.53457	0.155005	0.00126588	-0.362749	0.0050651	0.148202	0.170273	0.108578	0.695209	-0.647604	-0.467891	-0.225978	0.121034	0.0911094	0.354727	0.509987	-0.435828	0.372701	0.562058	-0.0975381	0.178659	0.744097	0.401708	0.412858	0.138088	-0.222402	-0.439979	-0.402786	0.0484976	-0.00423815	-0.178344	-0.363171	0.103381	-0.587363	-0.106904	-0.280452	0.313383	0.104917	-0.396378
-4.49865	-0.565805	0.651662	-0.245951	-0.72966	0.255537	-0.0620281	-0.0199727	-0.566566	-0.167038	0.602288	-0.533706	0.154686	0.000897867	-0.362728	0.00501337	0.14772	0.172552	0.110019	0.694369	-0.647973	-0.468083	-0.224614	0.121689	0.089921	0.355604	0.510758	-0.435643	0.370878	0.563034	-0.0969361	0.179181	0.74452	0.400649	0.411738	0.138635	-0.222545	-0.441333	-0.401882	0.046619	-0.00423298	-0.178787	-0.362503	0.102268	-0.586733	-0.107342	-0.280073	0.315083	0.104201	-0.39677
-4.49767	-0.565384	0.651661	-0.247549	-0.72994	0.254856	-0.0634095	-0.0172111	-0.567217	-0.166933	0.606316	-0.532845	0.154354	0.000526253	-0.3627	0.00494001	0.14723	0.174839	0.111461	0.693533	-0.648336	-0.468257	-0.223269	0.122339	0.0887381	0.356474	0.511529	-0.435463	0.369051	0.563986	-0.0963342	0.179715	0.744926	0.39957	0.410603	0.139171	-0.222702	-0.442675	-0.400963	0.0447381	-0.00421515	-0.179217	-0.361837	0.101155	-0.586093	-0.10778	-0.2797	0.316804	0.103485	-0.397154
-4.49668	-0.564969	0.651639	-0.249154	-0.730211	0.25419	-0.064787	-0.0144483	-0.567874	-0.166822	0.610334	-0.531989	0.154008	0.000151087	-0.362664	0.00484493	0.146733	0.177133	0.112903	0.692699	-0.648694	-0.468413	-0.221943	0.122985	0.0875609	0.357337	0.512298	-0.435289	0.367221	0.564915	-0.0957323	0.180261	0.745316	0.39847	0.409454	0.139698	-0.222874	-0.444005	-0.400028	0.0428552	-0.00418469	-0.179634	-0.361172	0.100044	-0.585443	-0.108218	-0.279332	0.318543	0.102768	-0.397532
-4.4957	-0.564562	0.651594	-0.250767	-0.730472	0.253538	-0.0661604	-0.0116845	-0.568537	-0.166703	0.614343	-0.531136	0.15365	-0.000227579	-0.362621	0.00472806	0.146228	0.179434	0.114345	0.691869	-0.649045	-0.468551	-0.220635	0.123626	0.0863897	0.358194	0.513067	-0.435119	0.365388	0.565821	-0.0951304	0.180819	0.745688	0.397351	0.408289	0.140215	-0.223061	-0.445322	-0.399077	0.0409705	-0.00414164	-0.180037	-0.360509	0.0989343	-0.584781	-0.108657	-0.278969	0.320303	0.102049	-0.397902
-4.49472	-0.564162	0.651528	-0.252387	-0.730725	0.2529	-0.0675299	-0.00892004	-0.569205	-0.166577	0.618342	-0.530288	0.153278	-0.000609693	-0.36257	0.00458934	0.145715	0.181741	0.115787	0.691042	-0.649392	-0.468671	-0.219348	0.124262	0.0852248	0.359044	0.513834	-0.434955	0.363551	0.566703	-0.0945285	0.181388	0.746042	0.396212	0.40711	0.140721	-0.223263	-0.446628	-0.39811	0.0390841	-0.00408606	-0.180428	-0.359847	0.0978259	-0.584109	-0.109097	-0.278611	0.322081	0.10133	-0.398265
-4.49373	-0.563768	0.651439	-0.254015	-0.730969	0.252277	-0.0688952	-0.00615516	-0.569878	-0.166444	0.62233	-0.529443	0.152894	-0.0009952	-0.36251	0.00442869	0.145195	0.184055	0.117229	0.690218	-0.649732	-0.468772	-0.218079	0.124894	0.0840664	0.359887	0.514601	-0.434797	0.361711	0.567561	-0.0939267	0.18197	0.746379	0.395053	0.405916	0.141218	-0.223479	-0.44792	-0.397128	0.0371962	-0.004018	-0.180806	-0.359188	0.0967191	-0.583426	-0.109538	-0.278258	0.323878	0.10061	-0.398622
-4.49275	-0.563382	0.651329	-0.255649	-0.731203	0.251668	-0.0702564	-0.00339014	-0.570557	-0.166305	0.626309	-0.528603	0.152496	-0.00138405	-0.362443	0.00424605	0.144668	0.186375	0.118672	0.689398	-0.650067	-0.468855	-0.21683	0.125522	0.0829147	0.360724	0.515367	-0.434644	0.359868	0.568395	-0.0933248	0.182564	0.746699	0.393874	0.404707	0.141704	-0.223711	-0.449201	-0.39613	0.035307	-0.0039375	-0.18117	-0.35853	0.095614	-0.582732	-0.10998	-0.27791	0.325695	0.0998888	-0.398971
-4.49177	-0.563003	0.651196	-0.25729	-0.731429	0.251073	-0.0716135	-0.000625267	-0.571241	-0.166159	0.630276	-0.527768	0.152085	-0.00177618	-0.362368	0.00404137	0.144132	0.188701	0.120114	0.688582	-0.650396	-0.46892	-0.2156	0.126144	0.0817701	0.361554	0.516131	-0.434497	0.358023	0.569205	-0.092723	0.18317	0.747	0.392675	0.403484	0.14218	-0.223956	-0.450468	-0.395117	0.0334168	-0.00384461	-0.181522	-0.357875	0.0945105	-0.582028	-0.110423	-0.277567	0.32753	0.0991668	-0.399313
-4.49079	-0.562632	0.651042	-0.258937	-0.731645	0.250492	-0.0729663	0.00213919	-0.57193	-0.166006	0.634232	-0.526936	0.151661	-0.00217154	-0.362285	0.00381457	0.143589	0.191032	0.121555	0.68777	-0.650719	-0.468966	-0.21439	0.126762	0.0806328	0.362377	0.516895	-0.434356	0.356176	0.569992	-0.0921212	0.183788	0.747283	0.391457	0.402246	0.142645	-0.224217	-0.451722	-0.394088	0.0315257	-0.00373939	-0.18186	-0.357221	0.0934088	-0.581314	-0.110867	-0.277229	0.329383	0.098444	-0.399647
-4.4898	-0.562267	0.650865	-0.26059	-0.731852	0.249925	-0.074315	0.00490296	-0.572624	-0.165846	0.638176	-0.526109	0.151224	-0.00257007	-0.362194	0.0035656	0.143038	0.193369	0.122997	0.686962	-0.651036	-0.468993	-0.2132	0.127375	0.079503	0.363193	0.517658	-0.434221	0.354326	0.570754	-0.0915195	0.184418	0.747547	0.390219	0.400993	0.143101	-0.224492	-0.452964	-0.393044	0.0296339	-0.0036219	-0.182185	-0.35657	0.0923089	-0.580589	-0.111313	-0.276896	0.331256	0.0977203	-0.399975
-4.48882	-0.56191	0.650666	-0.26225	-0.732051	0.249373	-0.0756594	0.00766576	-0.573324	-0.16568	0.642108	-0.525286	0.150775	-0.00297171	-0.362095	0.00329441	0.142479	0.195712	0.124437	0.686158	-0.651347	-0.469001	-0.21203	0.127983	0.078381	0.364003	0.518419	-0.434092	0.352473	0.571492	-0.0909177	0.18506	0.747793	0.388962	0.399725	0.143545	-0.224782	-0.454192	-0.391984	0.0277416	-0.00349219	-0.182496	-0.35592	0.091211	-0.579854	-0.111761	-0.276567	0.333146	0.0969958	-0.400295
-4.48784	-0.561561	0.650445	-0.263915	-0.73224	0.248836	-0.0769996	0.0104273	-0.574028	-0.165508	0.646028	-0.524468	0.150312	-0.00337641	-0.361988	0.00300095	0.141912	0.19806	0.125878	0.685359	-0.651653	-0.468991	-0.210879	0.128587	0.077267	0.364806	0.51918	-0.433968	0.350619	0.572206	-0.090316	0.185714	0.74802	0.387685	0.398443	0.14398	-0.225086	-0.455407	-0.39091	0.0258491	-0.00335031	-0.182795	-0.355274	0.0901151	-0.579109	-0.11221	-0.276244	0.335055	0.0962704	-0.400608
-4.48685	-0.561219	0.650202	-0.265587	-0.732419	0.248312	-0.0783354	0.0131874	-0.574737	-0.16533	0.649935	-0.523654	0.149836	-0.00378411	-0.361872	0.00268516	0.141337	0.200412	0.127317	0.684564	-0.651952	-0.468961	-0.209749	0.129185	0.0761613	0.365602	0.519939	-0.433851	0.348763	0.572896	-0.0897143	0.18638	0.748228	0.386389	0.397146	0.144403	-0.225406	-0.456609	-0.38982	0.0239565	-0.00319633	-0.18308	-0.354629	0.0890213	-0.578354	-0.112662	-0.275925	0.336981	0.0955442	-0.400913
-4.48587	-0.560884	0.649937	-0.267263	-0.73259	0.247803	-0.0796669	0.0159456	-0.575451	-0.165145	0.653828	-0.522844	0.149347	-0.00419475	-0.361748	0.00234701	0.140754	0.202769	0.128756	0.683774	-0.652246	-0.468913	-0.208639	0.129779	0.0750641	0.366391	0.520698	-0.43374	0.346906	0.573562	-0.0891127	0.187058	0.748417	0.385074	0.395834	0.144816	-0.22574	-0.457797	-0.388716	0.0220641	-0.00303031	-0.183352	-0.353987	0.0879296	-0.577588	-0.113115	-0.275611	0.338926	0.0948172	-0.401211
-4.48489	-0.560557	0.64965	-0.268945	-0.732751	0.247308	-0.080994	0.0187019	-0.576169	-0.164955	0.657709	-0.52204	0.148845	-0.00460826	-0.361616	0.00198645	0.140164	0.205131	0.130194	0.682988	-0.652533	-0.468846	-0.20755	0.130368	0.0739758	0.367173	0.521455	-0.433636	0.345047	0.574203	-0.0885111	0.187748	0.748587	0.38374	0.394508	0.145219	-0.226088	-0.458972	-0.387597	0.0201719	-0.00285231	-0.183611	-0.353347	0.0868402	-0.576813	-0.11357	-0.275301	0.340888	0.0940895	-0.401502
-4.4839	-0.560238	0.649341	-0.270633	-0.732904	0.246827	-0.0823167	0.0214557	-0.576892	-0.164758	0.661576	-0.521239	0.148331	-0.00502459	-0.361476	0.00160343	0.139565	0.207497	0.131631	0.682208	-0.652814	-0.468759	-0.206481	0.130951	0.0728964	0.367949	0.522211	-0.433537	0.343186	0.57482	-0.0879095	0.18845	0.748737	0.382387	0.393167	0.14561	-0.226452	-0.460132	-0.386463	0.0182804	-0.00266239	-0.183856	-0.35271	0.085753	-0.576028	-0.114028	-0.274996	0.342867	0.093361	-0.401785
-4.48292	-0.559926	0.649009	-0.272325	-0.733047	0.246361	-0.083635	0.024207	-0.577619	-0.164556	0.665428	-0.520444	0.147803	-0.00544367	-0.361327	0.00119793	0.138958	0.209868	0.133067	0.681432	-0.65309	-0.468654	-0.205432	0.13153	0.0718264	0.368718	0.522966	-0.433445	0.341325	0.575413	-0.087308	0.189165	0.748867	0.381014	0.391812	0.145991	-0.22683	-0.461279	-0.385314	0.0163895	-0.00246062	-0.184088	-0.352076	0.0846683	-0.575233	-0.114488	-0.274696	0.344864	0.0926317	-0.402061
-4.48194	-0.559622	0.648656	-0.274022	-0.733181	0.245909	-0.0849488	0.0269555	-0.578351	-0.164348	0.669266	-0.519653	0.147263	-0.00586544	-0.361169	0.000769902	0.138343	0.212242	0.134501	0.680662	-0.653359	-0.468529	-0.204405	0.132104	0.0707658	0.36948	0.52372	-0.43336	0.339462	0.575981	-0.0867065	0.189891	0.748978	0.379623	0.390442	0.146361	-0.227222	-0.462412	-0.384151	0.0144996	-0.00224707	-0.184307	-0.351444	0.083586	-0.574428	-0.114951	-0.2744	0.346878	0.0919018	-0.402329
-4.48095	-0.559326	0.648281	-0.275723	-0.733305	0.245471	-0.0862581	0.0297008	-0.579086	-0.164134	0.673089	-0.518867	0.14671	-0.00628985	-0.361003	0.00031932	0.13772	0.21462	0.135935	0.679897	-0.653622	-0.468385	-0.203398	0.132672	0.0697151	0.370235	0.524473	-0.433281	0.337599	0.576524	-0.086105	0.190629	0.749068	0.378213	0.389057	0.146721	-0.22763	-0.463531	-0.382974	0.0126109	-0.0020218	-0.184513	-0.350814	0.0825061	-0.573614	-0.115416	-0.274109	0.348908	0.0911711	-0.40259
-4.47997	-0.559037	0.647883	-0.277429	-0.73342	0.245048	-0.0875629	0.0324426	-0.579826	-0.163915	0.676897	-0.518085	0.146144	-0.00671682	-0.360828	-0.000153847	0.137089	0.217001	0.137367	0.679137	-0.653879	-0.468221	-0.202411	0.133236	0.0686743	0.370983	0.525224	-0.433209	0.335735	0.577044	-0.0855036	0.19138	0.749139	0.376785	0.387658	0.147069	-0.228051	-0.464636	-0.381782	0.0107235	-0.00178488	-0.184705	-0.350188	0.0814289	-0.57279	-0.115884	-0.273822	0.350956	0.0904397	-0.402843
-4.47899	-0.558757	0.647464	-0.27914	-0.733527	0.244638	-0.088863	0.0351809	-0.58057	-0.163691	0.680689	-0.517309	0.145565	-0.00714628	-0.360645	-0.000649625	0.13645	0.219385	0.138797	0.678383	-0.65413	-0.468038	-0.201446	0.133794	0.0676438	0.371725	0.525974	-0.433144	0.333871	0.577538	-0.0849022	0.192142	0.749189	0.375338	0.386245	0.147406	-0.228488	-0.465726	-0.380577	0.00883767	-0.00153639	-0.184884	-0.349565	0.0803543	-0.571957	-0.116355	-0.27354	0.35302	0.0897076	-0.403089
-4.47801	-0.558485	0.647023	-0.280854	-0.733623	0.244243	-0.0901586	0.0379152	-0.581317	-0.163461	0.684466	-0.516537	0.144974	-0.00757819	-0.360453	-0.00116804	0.135803	0.221773	0.140226	0.677634	-0.654374	-0.467836	-0.200502	0.134347	0.0666238	0.372459	0.526724	-0.433086	0.332006	0.578008	-0.0843009	0.192917	0.749218	0.373872	0.384817	0.147733	-0.228939	-0.466802	-0.379357	0.00695363	-0.0012764	-0.18505	-0.348944	0.0792824	-0.571114	-0.116829	-0.273262	0.355101	0.0889749	-0.403327
-4.47702	-0.55822	0.646559	-0.282572	-0.733711	0.243862	-0.0914496	0.0406452	-0.582069	-0.163227	0.688226	-0.51577	0.14437	-0.00801247	-0.360253	-0.0017091	0.135147	0.224164	0.141653	0.676892	-0.654613	-0.467614	-0.199579	0.134895	0.0656146	0.373187	0.527472	-0.433034	0.330142	0.578453	-0.0836996	0.193704	0.749227	0.372388	0.383375	0.148048	-0.229404	-0.467864	-0.378123	0.00507156	-0.00100497	-0.185202	-0.348326	0.0782132	-0.570262	-0.117306	-0.272989	0.357197	0.0882415	-0.403557
-4.47604	-0.557964	0.646074	-0.284294	-0.733789	0.243495	-0.0927359	0.0433709	-0.582824	-0.162987	0.69197	-0.515008	0.143753	-0.00844905	-0.360043	-0.00227285	0.134483	0.226557	0.143078	0.676155	-0.654845	-0.467373	-0.198677	0.135437	0.0646163	0.373908	0.528219	-0.43299	0.328277	0.578874	-0.0830984	0.194502	0.749215	0.370885	0.381918	0.148353	-0.229885	-0.468911	-0.376876	0.00319168	-0.000722192	-0.185342	-0.347712	0.0771469	-0.5694	-0.117786	-0.272719	0.35931	0.0875075	-0.40378
-4.47506	-0.557716	0.645567	-0.286019	-0.733858	0.243142	-0.0940174	0.0460918	-0.583583	-0.162742	0.695696	-0.514252	0.143124	-0.00888787	-0.359825	-0.00285927	0.133811	0.228953	0.144502	0.675424	-0.65507	-0.467111	-0.197796	0.135975	0.0636292	0.374622	0.528964	-0.432952	0.326413	0.57927	-0.0824973	0.195313	0.749182	0.369365	0.380447	0.148646	-0.230379	-0.469943	-0.375614	0.00131419	-0.000428134	-0.185468	-0.347101	0.0760835	-0.56853	-0.11827	-0.272454	0.361439	0.0867729	-0.403995
-4.47407	-0.557476	0.645038	-0.287748	-0.733918	0.242803	-0.0952943	0.0488077	-0.584345	-0.162493	0.699406	-0.5135	0.142482	-0.00932886	-0.359599	-0.0034684	0.133131	0.23135	0.145923	0.674699	-0.65529	-0.466831	-0.196937	0.136507	0.0626537	0.375329	0.529709	-0.432922	0.324549	0.579641	-0.0818962	0.196135	0.749128	0.367826	0.378962	0.148928	-0.230888	-0.470961	-0.37434	-0.000560704	-0.000122875	-0.185581	-0.346492	0.075023	-0.56765	-0.118757	-0.272193	0.363583	0.0860377	-0.404202
-4.47309	-0.557244	0.644487	-0.28948	-0.733968	0.242479	-0.0965664	0.0515183	-0.58511	-0.162239	0.703098	-0.512753	0.141828	-0.00977195	-0.359363	-0.00410024	0.132442	0.23375	0.147343	0.67398	-0.655503	-0.46653	-0.196099	0.137034	0.0616898	0.376029	0.530452	-0.432899	0.322686	0.579988	-0.0812951	0.19697	0.749053	0.366269	0.377463	0.149199	-0.231412	-0.471964	-0.373052	-0.00243278	0.000193505	-0.18568	-0.345887	0.0739655	-0.566762	-0.119248	-0.271937	0.365743	0.0853019	-0.404402
-4.47211	-0.557021	0.643914	-0.291214	-0.734009	0.242168	-0.0978337	0.0542235	-0.585879	-0.16198	0.706771	-0.512011	0.141161	-0.0102171	-0.359118	-0.00475479	0.131745	0.236152	0.14876	0.673268	-0.65571	-0.46621	-0.195283	0.137555	0.0607378	0.376723	0.531194	-0.432883	0.320823	0.580309	-0.0806942	0.197816	0.748956	0.364694	0.375949	0.149458	-0.23195	-0.472951	-0.371751	-0.00430185	0.000520926	-0.185767	-0.345285	0.072911	-0.565864	-0.119743	-0.271684	0.367919	0.0845655	-0.404593
-4.47112	-0.556806	0.64332	-0.292952	-0.734041	0.241871	-0.0990961	0.0569228	-0.58665	-0.161717	0.710427	-0.511275	0.140482	-0.0106642	-0.358865	-0.00543206	0.13104	0.238555	0.150174	0.672562	-0.65591	-0.46587	-0.194488	0.138071	0.059798	0.377409	0.531935	-0.432874	0.318961	0.580606	-0.0800933	0.198675	0.748838	0.363102	0.374421	0.149707	-0.232502	-0.473924	-0.370436	-0.00616768	0.000859307	-0.18584	-0.344687	0.0718597	-0.564958	-0.120241	-0.271436	0.370109	0.0838286	-0.404778
-4.47014	-0.556599	0.642704	-0.294692	-0.734064	0.241589	-0.100354	0.0596162	-0.587425	-0.161449	0.714064	-0.510543	0.139791	-0.0111132	-0.358602	-0.00613204	0.130327	0.24096	0.151587	0.671863	-0.656104	-0.46551	-0.193715	0.138581	0.0588706	0.378089	0.532675	-0.432873	0.317101	0.580879	-0.0794924	0.199545	0.748698	0.361492	0.372879	0.149944	-0.233069	-0.474882	-0.369109	-0.00803009	0.00120856	-0.1859	-0.344092	0.0708115	-0.564043	-0.120743	-0.271191	0.372314	0.0830911	-0.404954
-4.46916	-0.556401	0.642066	-0.296435	-0.734077	0.24132	-0.101606	0.0623032	-0.588202	-0.161178	0.717682	-0.509817	0.139087	-0.011564	-0.358331	-0.00685475	0.129605	0.243366	0.152996	0.67117	-0.656291	-0.46513	-0.192963	0.139086	0.0579558	0.378761	0.533413	-0.432879	0.315241	0.581126	-0.0788917	0.200428	0.748537	0.359864	0.371322	0.150169	-0.23365	-0.475824	-0.367769	-0.00988885	0.00156861	-0.185947	-0.343501	0.0697665	-0.56312	-0.12125	-0.270951	0.374534	0.0823532	-0.405122
-4.46818	-0.556212	0.641407	-0.298179	-0.734081	0.241065	-0.102854	0.0649837	-0.588983	-0.160902	0.72128	-0.509096	0.138371	-0.0120166	-0.358051	-0.00760016	0.128875	0.245773	0.154403	0.670484	-0.656473	-0.46473	-0.192233	0.139586	0.0570539	0.379427	0.534151	-0.432892	0.313383	0.581349	-0.078291	0.201322	0.748354	0.358218	0.369752	0.150384	-0.234245	-0.476751	-0.366416	-0.0117438	0.00193937	-0.185981	-0.342913	0.0687248	-0.562187	-0.12176	-0.270714	0.376769	0.0816147	-0.405283
-4.46719	-0.556031	0.640726	-0.299926	-0.734076	0.240823	-0.104097	0.0676574	-0.589765	-0.160622	0.724859	-0.508381	0.137643	-0.0124708	-0.357761	-0.00836827	0.128137	0.248181	0.155808	0.669805	-0.656647	-0.464311	-0.191525	0.140079	0.0561651	0.380086	0.534887	-0.432913	0.311527	0.581547	-0.0776904	0.202228	0.748148	0.356556	0.368168	0.150587	-0.234854	-0.477663	-0.365051	-0.0135946	0.00232075	-0.186002	-0.342328	0.0676863	-0.561247	-0.122275	-0.270482	0.379018	0.0808758	-0.405436
-4.46621	-0.555858	0.640023	-0.301675	-0.734061	0.240596	-0.105335	0.0703241	-0.590551	-0.160338	0.728419	-0.507671	0.136902	-0.0129267	-0.357463	-0.00915908	0.127391	0.25059	0.157209	0.669133	-0.656815	-0.463871	-0.190839	0.140568	0.0552895	0.380738	0.535623	-0.432942	0.309672	0.58172	-0.0770899	0.203146	0.747921	0.354876	0.366569	0.150778	-0.235478	-0.478559	-0.363673	-0.0154412	0.00271266	-0.18601	-0.341747	0.0666513	-0.560298	-0.122795	-0.270253	0.381281	0.0801363	-0.405581
-4.46523	-0.555694	0.639299	-0.303425	-0.734037	0.240382	-0.106568	0.0729835	-0.591338	-0.160051	0.731957	-0.506966	0.13615	-0.0133841	-0.357156	-0.00997255	0.126636	0.252999	0.158608	0.668468	-0.656977	-0.463412	-0.190175	0.14105	0.0544276	0.381383	0.536357	-0.432978	0.30782	0.581869	-0.0764895	0.204075	0.747671	0.353178	0.364957	0.150958	-0.236116	-0.47944	-0.362283	-0.0172833	0.00311501	-0.186005	-0.34117	0.0656196	-0.559341	-0.123318	-0.270028	0.383558	0.0793965	-0.405718
-4.46424	-0.555539	0.638554	-0.305177	-0.734004	0.240182	-0.107796	0.0756353	-0.592128	-0.15976	0.735476	-0.506266	0.135385	-0.013843	-0.356839	-0.0108087	0.125873	0.255408	0.160003	0.667809	-0.657132	-0.462932	-0.189532	0.141527	0.0535793	0.382021	0.53709	-0.433022	0.305969	0.581992	-0.0758891	0.205017	0.747399	0.351464	0.36333	0.151126	-0.236768	-0.480305	-0.360881	-0.0191207	0.00352771	-0.185987	-0.340597	0.0645914	-0.558375	-0.123847	-0.269807	0.385849	0.0786561	-0.405848
-4.46326	-0.555393	0.637787	-0.306931	-0.733962	0.239996	-0.109018	0.0782793	-0.592921	-0.159465	0.738973	-0.505573	0.134609	-0.0143033	-0.356513	-0.0116675	0.125101	0.257817	0.161396	0.667158	-0.657281	-0.462433	-0.188912	0.141999	0.0527451	0.382652	0.537822	-0.433074	0.304121	0.582091	-0.0752889	0.20597	0.747104	0.349733	0.36169	0.151283	-0.237434	-0.481155	-0.359467	-0.0209532	0.00395068	-0.185956	-0.340027	0.0635667	-0.557402	-0.12438	-0.26959	0.388154	0.0779154	-0.405969
-4.46228	-0.555256	0.636999	-0.308685	-0.73391	0.239823	-0.110236	0.0809152	-0.593715	-0.159167	0.742449	-0.504884	0.13382	-0.014765	-0.356179	-0.0125489	0.124321	0.260226	0.162785	0.666514	-0.657423	-0.461913	-0.188314	0.142465	0.051925	0.383276	0.538552	-0.433134	0.302275	0.582166	-0.0746888	0.206935	0.746787	0.347985	0.360036	0.151429	-0.238114	-0.481989	-0.358042	-0.0227806	0.00438381	-0.185912	-0.339462	0.0625455	-0.55642	-0.124918	-0.269376	0.390472	0.0771743	-0.406083
-4.46129	-0.555127	0.636189	-0.310441	-0.733849	0.239663	-0.111448	0.0835429	-0.594511	-0.158866	0.745904	-0.504201	0.13302	-0.0152279	-0.355835	-0.0134528	0.123534	0.262634	0.16417	0.665878	-0.657558	-0.461374	-0.187737	0.142924	0.0511194	0.383894	0.539282	-0.433201	0.300431	0.582215	-0.0740888	0.207912	0.746447	0.34622	0.358368	0.151562	-0.238808	-0.482807	-0.356604	-0.0246027	0.00482701	-0.185856	-0.3389	0.0615278	-0.555431	-0.12546	-0.269167	0.392803	0.0764327	-0.406189
-4.46031	-0.555008	0.635359	-0.312198	-0.733779	0.239517	-0.112656	0.086162	-0.595308	-0.158562	0.749336	-0.503524	0.132208	-0.0156919	-0.355482	-0.0143794	0.122737	0.265042	0.165552	0.665249	-0.657687	-0.460814	-0.187183	0.143379	0.0503284	0.384504	0.540011	-0.433276	0.29859	0.58224	-0.0734889	0.2089	0.746085	0.344439	0.356686	0.151684	-0.239516	-0.483609	-0.355156	-0.0264192	0.0052802	-0.185786	-0.338342	0.0605138	-0.554434	-0.126008	-0.26896	0.395147	0.0756908	-0.406287
-4.45933	-0.554897	0.634507	-0.313955	-0.7337	0.239384	-0.113858	0.0887723	-0.596108	-0.158254	0.752747	-0.502852	0.131384	-0.0161571	-0.35512	-0.0153284	0.121933	0.267449	0.166931	0.664627	-0.65781	-0.460234	-0.186651	0.143827	0.0495523	0.385107	0.540739	-0.43336	0.296752	0.582241	-0.0728891	0.2099	0.745699	0.342641	0.354991	0.151795	-0.240238	-0.484395	-0.353696	-0.0282301	0.00574327	-0.185704	-0.337788	0.0595034	-0.553429	-0.126561	-0.268758	0.397504	0.0749486	-0.406377
-4.45834	-0.554795	0.633634	-0.315713	-0.733612	0.239265	-0.115055	0.0913736	-0.596909	-0.157944	0.756135	-0.502186	0.130549	-0.0166233	-0.354748	-0.0163	0.12112	0.269855	0.168305	0.664013	-0.657925	-0.459634	-0.186141	0.144269	0.0487912	0.385704	0.541465	-0.433451	0.294918	0.582216	-0.0722894	0.210912	0.745291	0.340826	0.353282	0.151893	-0.240974	-0.485165	-0.352225	-0.0300349	0.00621612	-0.185609	-0.337239	0.0584967	-0.552416	-0.127119	-0.268559	0.399873	0.074206	-0.406459
-4.45736	-0.554703	0.632741	-0.317471	-0.733514	0.239159	-0.116246	0.0939657	-0.597711	-0.15763	0.7595	-0.501526	0.129702	-0.0170905	-0.354368	-0.017294	0.120299	0.27226	0.169676	0.663406	-0.658034	-0.459015	-0.185654	0.144706	0.0480454	0.386293	0.542191	-0.43355	0.293086	0.582167	-0.0716899	0.211935	0.74486	0.338996	0.351559	0.15198	-0.241723	-0.485919	-0.350743	-0.0318337	0.00669866	-0.185501	-0.336693	0.0574937	-0.551396	-0.127682	-0.268363	0.402255	0.0734631	-0.406533
-4.45638	-0.55462	0.631826	-0.319229	-0.733407	0.239065	-0.117433	0.0965482	-0.598514	-0.157315	0.762842	-0.500872	0.128843	-0.0175586	-0.353978	-0.0183104	0.11947	0.274664	0.171043	0.662808	-0.658137	-0.458374	-0.185188	0.145137	0.047315	0.386876	0.542916	-0.433657	0.291258	0.582094	-0.0710904	0.212969	0.744405	0.337149	0.349823	0.152056	-0.242486	-0.486658	-0.34925	-0.033626	0.00719079	-0.185381	-0.336152	0.0564944	-0.550369	-0.128251	-0.268171	0.404649	0.0727199	-0.406599
-4.4554	-0.554546	0.630891	-0.320987	-0.733291	0.238985	-0.118614	0.099121	-0.599319	-0.156996	0.766161	-0.500223	0.127974	-0.0180275	-0.353579	-0.0193491	0.118633	0.277066	0.172406	0.662216	-0.658233	-0.457714	-0.184745	0.145561	0.0466004	0.387452	0.54364	-0.433773	0.289433	0.581996	-0.0704912	0.214016	0.743927	0.335286	0.348073	0.152119	-0.243263	-0.48738	-0.347747	-0.0354119	0.00769241	-0.185249	-0.335615	0.055499	-0.549334	-0.128825	-0.267983	0.407055	0.0719764	-0.406658
-4.45441	-0.554481	0.629935	-0.322746	-0.733166	0.238918	-0.119789	0.101684	-0.600125	-0.156675	0.769456	-0.49958	0.127092	-0.0184971	-0.353171	-0.0204102	0.117787	0.279466	0.173765	0.661633	-0.658322	-0.457034	-0.184324	0.14598	0.0459017	0.38802	0.544362	-0.433896	0.287612	0.581873	-0.069892	0.215073	0.743427	0.333408	0.34631	0.152171	-0.244054	-0.488085	-0.346233	-0.0371909	0.00820341	-0.185103	-0.335082	0.0545073	-0.548292	-0.129405	-0.267798	0.409472	0.0712326	-0.406708
-4.45343	-0.554425	0.628958	-0.324504	-0.733032	0.238864	-0.12096	0.104236	-0.600931	-0.156352	0.772727	-0.498943	0.1262	-0.0189674	-0.352754	-0.0214936	0.116934	0.281864	0.17512	0.661058	-0.658405	-0.456334	-0.183925	0.146393	0.045219	0.388582	0.545084	-0.434028	0.285795	0.581726	-0.069293	0.216142	0.742902	0.331514	0.344533	0.152211	-0.244858	-0.488775	-0.344709	-0.0389629	0.00872369	-0.184946	-0.334554	0.0535195	-0.547243	-0.12999	-0.267616	0.411901	0.0704885	-0.406751
-4.45245	-0.554379	0.62796	-0.326261	-0.732889	0.238823	-0.122125	0.106778	-0.601738	-0.156027	0.775973	-0.498312	0.125296	-0.0194382	-0.352327	-0.0225992	0.116072	0.28426	0.17647	0.66049	-0.65848	-0.455614	-0.183549	0.1468	0.0445527	0.389137	0.545806	-0.434168	0.283982	0.581555	-0.0686942	0.217223	0.742355	0.329603	0.342743	0.152239	-0.245675	-0.489448	-0.343175	-0.0407278	0.00925315	-0.184776	-0.33403	0.0525355	-0.546186	-0.130582	-0.267438	0.414342	0.0697443	-0.406785
-4.45146	-0.554342	0.626943	-0.328018	-0.732736	0.238795	-0.123284	0.10931	-0.602546	-0.155699	0.779195	-0.497686	0.124381	-0.0199096	-0.351892	-0.0237269	0.115202	0.286653	0.177816	0.659931	-0.65855	-0.454873	-0.183195	0.1472	0.0439028	0.389684	0.546526	-0.434316	0.282173	0.581359	-0.0680955	0.218315	0.741784	0.327678	0.340939	0.152255	-0.246506	-0.490105	-0.341631	-0.0424853	0.00979168	-0.184593	-0.33351	0.0515555	-0.545123	-0.131179	-0.267262	0.416793	0.0689998	-0.406812
-4.45048	-0.554315	0.625904	-0.329774	-0.732575	0.238779	-0.124438	0.11183	-0.603354	-0.15537	0.782393	-0.497067	0.123455	-0.0203814	-0.351447	-0.0248767	0.114324	0.289044	0.179157	0.659379	-0.658612	-0.454113	-0.182863	0.147595	0.0432697	0.390225	0.547245	-0.434473	0.280368	0.581139	-0.067497	0.219418	0.741189	0.325737	0.339123	0.152259	-0.247351	-0.490745	-0.340078	-0.0442351	0.0103392	-0.184399	-0.332995	0.0505793	-0.544053	-0.131781	-0.267091	0.419256	0.0682551	-0.406831
-4.4495	-0.554297	0.624846	-0.331529	-0.732404	0.238775	-0.125587	0.11434	-0.604163	-0.155038	0.785565	-0.496454	0.122518	-0.0208536	-0.350993	-0.0260486	0.113438	0.291433	0.180494	0.658836	-0.658668	-0.453332	-0.182554	0.147983	0.0426534	0.390759	0.547964	-0.434637	0.278568	0.580895	-0.0668987	0.220532	0.740571	0.323781	0.337293	0.152251	-0.248208	-0.491369	-0.338514	-0.0459772	0.0108955	-0.184192	-0.332484	0.0496071	-0.542976	-0.13239	-0.266922	0.421729	0.0675102	-0.406842
-4.44851	-0.554288	0.623767	-0.333283	-0.732225	0.238785	-0.12673	0.116838	-0.604972	-0.154706	0.788711	-0.495846	0.121571	-0.0213261	-0.350529	-0.0272424	0.112544	0.293818	0.181826	0.658301	-0.658717	-0.452531	-0.182267	0.148366	0.0420543	0.391286	0.548682	-0.43481	0.276772	0.580626	-0.0663005	0.221658	0.739929	0.32181	0.33545	0.152232	-0.249079	-0.491977	-0.336942	-0.0477112	0.0114607	-0.183973	-0.331978	0.0486389	-0.541892	-0.133005	-0.266756	0.424212	0.0667652	-0.406845
-4.44753	-0.554289	0.622668	-0.335036	-0.732036	0.238806	-0.127867	0.119324	-0.605781	-0.154371	0.791832	-0.495245	0.120612	-0.0217988	-0.350057	-0.0284581	0.111642	0.2962	0.183152	0.657774	-0.65876	-0.451711	-0.182002	0.148742	0.0414724	0.391805	0.549399	-0.434992	0.274981	0.580334	-0.0657026	0.222794	0.739264	0.319823	0.333593	0.152201	-0.249963	-0.492568	-0.335361	-0.0494371	0.0120344	-0.183742	-0.331477	0.0476746	-0.540802	-0.133626	-0.266594	0.426706	0.0660199	-0.40684
-4.44655	-0.5543	0.621549	-0.336788	-0.731839	0.23884	-0.128999	0.121799	-0.606589	-0.154035	0.794927	-0.49465	0.119643	-0.0222716	-0.349575	-0.0296957	0.110732	0.298579	0.184474	0.657255	-0.658795	-0.45087	-0.181759	0.149112	0.0409079	0.392318	0.550116	-0.435182	0.273195	0.580017	-0.0651048	0.223942	0.738575	0.317822	0.331724	0.152157	-0.25086	-0.493142	-0.33377	-0.0511545	0.0126167	-0.183499	-0.33098	0.0467144	-0.539706	-0.134254	-0.266435	0.42921	0.0652746	-0.406828
-4.44557	-0.554321	0.62041	-0.338538	-0.731632	0.238887	-0.130125	0.124262	-0.607398	-0.153698	0.797995	-0.494061	0.118663	-0.0227445	-0.349084	-0.030955	0.109814	0.300954	0.185791	0.656744	-0.658824	-0.45001	-0.181539	0.149475	0.0403612	0.392824	0.550832	-0.43538	0.271414	0.579676	-0.0645072	0.225101	0.737862	0.315806	0.329842	0.152102	-0.251771	-0.4937	-0.332171	-0.0528633	0.0132074	-0.183244	-0.330489	0.0457581	-0.538603	-0.134887	-0.266279	0.431724	0.0645292	-0.406807
-4.44458	-0.554351	0.619252	-0.340286	-0.731417	0.238945	-0.131246	0.126712	-0.608206	-0.153359	0.801037	-0.493479	0.117672	-0.0232173	-0.348584	-0.0322359	0.108888	0.303326	0.187103	0.656242	-0.658847	-0.449129	-0.181341	0.149833	0.0398322	0.393323	0.551547	-0.435587	0.269639	0.579311	-0.0639098	0.226271	0.737125	0.313776	0.327947	0.152035	-0.252694	-0.494241	-0.330563	-0.0545632	0.0138065	-0.182977	-0.330001	0.0448059	-0.537493	-0.135527	-0.266126	0.434247	0.0637836	-0.406778
-4.4436	-0.554391	0.618073	-0.342033	-0.731193	0.239015	-0.132361	0.12915	-0.609014	-0.153019	0.804052	-0.492902	0.116671	-0.0236901	-0.348075	-0.0335385	0.107955	0.305693	0.188409	0.655748	-0.658862	-0.448229	-0.181165	0.150184	0.0393213	0.393815	0.552262	-0.435802	0.267868	0.578923	-0.0633126	0.227452	0.736365	0.311731	0.326039	0.151956	-0.25363	-0.494766	-0.328947	-0.0562541	0.0144137	-0.182699	-0.329519	0.0438578	-0.536378	-0.136174	-0.265976	0.43678	0.063038	-0.406742
-4.44262	-0.554441	0.616875	-0.343777	-0.730959	0.239098	-0.133471	0.131575	-0.609821	-0.152679	0.80704	-0.492332	0.11566	-0.0241627	-0.347557	-0.0348625	0.107013	0.308057	0.18971	0.655262	-0.658871	-0.447309	-0.181012	0.150528	0.0388286	0.3943	0.552977	-0.436026	0.266104	0.578511	-0.0627157	0.228643	0.73558	0.309671	0.324118	0.151864	-0.254579	-0.495274	-0.327323	-0.0579358	0.015029	-0.182409	-0.329042	0.0429137	-0.535256	-0.136827	-0.265828	0.439321	0.0622923	-0.406698
-4.44163	-0.5545	0.615658	-0.345519	-0.730718	0.239192	-0.134574	0.133988	-0.610627	-0.152337	0.810001	-0.491768	0.114639	-0.0246351	-0.34703	-0.036208	0.106064	0.310416	0.191006	0.654785	-0.658874	-0.446369	-0.180881	0.150867	0.0383542	0.394778	0.55369	-0.436258	0.264344	0.578074	-0.062119	0.229846	0.734772	0.307598	0.322184	0.151761	-0.25554	-0.495765	-0.325691	-0.0596081	0.0156523	-0.182107	-0.328569	0.0419737	-0.534128	-0.137486	-0.265684	0.441872	0.0615466	-0.406646
-4.44065	-0.55457	0.614421	-0.34726	-0.730467	0.239298	-0.135672	0.136387	-0.611433	-0.151995	0.812934	-0.49121	0.113607	-0.0251071	-0.346493	-0.0375749	0.105107	0.312771	0.192296	0.654316	-0.658869	-0.445409	-0.180772	0.151199	0.0378984	0.395249	0.554404	-0.436498	0.262591	0.577615	-0.0615225	0.231059	0.73394	0.30551	0.320238	0.151646	-0.256515	-0.49624	-0.324051	-0.0612707	0.0162834	-0.181793	-0.328102	0.0410378	-0.532995	-0.138152	-0.265543	0.444431	0.0608008	-0.406586
-4.43967	-0.554649	0.613165	-0.348997	-0.730207	0.239415	-0.136764	0.138773	-0.612237	-0.151652	0.815839	-0.490659	0.112565	-0.0255787	-0.345947	-0.0389629	0.104142	0.315121	0.19358	0.653856	-0.658858	-0.444429	-0.180685	0.151524	0.0374613	0.395713	0.555116	-0.436747	0.260844	0.577131	-0.0609263	0.232283	0.733084	0.303409	0.318279	0.151519	-0.257502	-0.496698	-0.322403	-0.0629235	0.0169223	-0.181468	-0.327639	0.040106	-0.531855	-0.138825	-0.265404	0.446999	0.0600551	-0.406519
-4.43868	-0.554739	0.61189	-0.350732	-0.729939	0.239544	-0.137851	0.141145	-0.61304	-0.151309	0.818716	-0.490114	0.111514	-0.0260499	-0.345393	-0.0403721	0.10317	0.317466	0.194858	0.653404	-0.65884	-0.44343	-0.180621	0.151843	0.0370431	0.39617	0.555829	-0.437005	0.259102	0.576625	-0.0603303	0.233518	0.732204	0.301294	0.316307	0.15138	-0.258501	-0.497139	-0.320748	-0.0645662	0.0175688	-0.181132	-0.327182	0.0391783	-0.53071	-0.139505	-0.265269	0.449575	0.0593093	-0.406443
-4.4377	-0.554838	0.610596	-0.352465	-0.729662	0.239685	-0.138931	0.143504	-0.613842	-0.150965	0.821564	-0.489576	0.110452	-0.0265205	-0.344829	-0.0418023	0.10219	0.319806	0.19613	0.652961	-0.658815	-0.442411	-0.180578	0.152156	0.0366439	0.39662	0.556541	-0.437272	0.257367	0.576095	-0.0597346	0.234763	0.7313	0.299165	0.314323	0.151228	-0.259513	-0.497563	-0.319086	-0.0661988	0.0182228	-0.180785	-0.326729	0.0382547	-0.52956	-0.140191	-0.265136	0.452159	0.0585636	-0.40636
-4.43672	-0.554948	0.609283	-0.354194	-0.729376	0.239837	-0.140006	0.145849	-0.614642	-0.150621	0.824384	-0.489044	0.109381	-0.0269905	-0.344257	-0.0432535	0.101202	0.322141	0.197397	0.652526	-0.658784	-0.441372	-0.180558	0.152462	0.036264	0.397063	0.557253	-0.437546	0.255638	0.575541	-0.0591391	0.236019	0.730372	0.297022	0.312326	0.151065	-0.260537	-0.497971	-0.317418	-0.0678209	0.0188842	-0.180426	-0.326282	0.0373352	-0.528404	-0.140884	-0.265006	0.454751	0.057818	-0.406269
-4.43574	-0.555068	0.607951	-0.355921	-0.729082	0.24	-0.141075	0.14818	-0.615441	-0.150277	0.827175	-0.488519	0.1083	-0.0274598	-0.343675	-0.0447255	0.100207	0.324471	0.198657	0.652099	-0.658746	-0.440314	-0.18056	0.152762	0.0359034	0.397499	0.557965	-0.43783	0.253916	0.574964	-0.058544	0.237285	0.72942	0.294867	0.310317	0.15089	-0.261573	-0.498362	-0.315742	-0.0694323	0.0195528	-0.180056	-0.32584	0.0364199	-0.527242	-0.141585	-0.264879	0.457351	0.0570724	-0.40617
-4.43475	-0.555197	0.6066	-0.357645	-0.728779	0.240173	-0.142138	0.150496	-0.616238	-0.149933	0.829937	-0.488	0.10721	-0.0279283	-0.343084	-0.0462182	0.0992049	0.326795	0.199911	0.651682	-0.658701	-0.439236	-0.180584	0.153055	0.0355624	0.397928	0.558676	-0.438122	0.252201	0.574365	-0.0579491	0.238562	0.728444	0.292698	0.308296	0.150702	-0.262622	-0.498736	-0.31406	-0.071033	0.0202286	-0.179675	-0.325403	0.0355087	-0.526075	-0.142292	-0.264754	0.459958	0.0563269	-0.406064
-4.43377	-0.555337	0.605231	-0.359365	-0.728468	0.240358	-0.143195	0.152798	-0.617033	-0.149589	0.832669	-0.487487	0.10611	-0.028396	-0.342485	-0.0477315	0.098195	0.329113	0.201159	0.651272	-0.65865	-0.438139	-0.180629	0.153341	0.0352411	0.39835	0.559387	-0.438422	0.250492	0.573742	-0.0573545	0.239849	0.727444	0.290516	0.306262	0.150503	-0.263683	-0.499093	-0.312371	-0.0726226	0.0209115	-0.179284	-0.324972	0.0346016	-0.524903	-0.143006	-0.264632	0.462572	0.0555815	-0.40595
-4.43279	-0.555488	0.603844	-0.361082	-0.728148	0.240554	-0.144246	0.155085	-0.617826	-0.149245	0.835372	-0.486982	0.105	-0.0288627	-0.341877	-0.0492654	0.0971778	0.331425	0.2024	0.650872	-0.658592	-0.437022	-0.180697	0.153621	0.0349397	0.398765	0.560099	-0.438732	0.24879	0.573096	-0.0567602	0.241146	0.72642	0.288321	0.304217	0.150292	-0.264755	-0.499433	-0.310677	-0.074201	0.0216012	-0.178881	-0.324546	0.0336986	-0.523726	-0.143727	-0.264512	0.465193	0.0548363	-0.405828
-4.4318	-0.555648	0.602438	-0.362795	-0.72782	0.240761	-0.145292	0.157357	-0.618617	-0.148902	0.838045	-0.486483	0.103882	-0.0293284	-0.341259	-0.0508196	0.0961532	0.333731	0.203635	0.650479	-0.658528	-0.435886	-0.180787	0.153894	0.0346582	0.399173	0.56081	-0.439049	0.247095	0.572428	-0.0561663	0.242454	0.725373	0.286114	0.302159	0.150068	-0.26584	-0.499757	-0.308977	-0.0757681	0.0222977	-0.178468	-0.324125	0.0327998	-0.522543	-0.144456	-0.264396	0.46782	0.0540912	-0.405699
-4.43082	-0.555819	0.601014	-0.364505	-0.727483	0.240978	-0.146331	0.159614	-0.619406	-0.148559	0.840688	-0.485991	0.102754	-0.029793	-0.340633	-0.052394	0.0951214	0.336031	0.204863	0.650096	-0.658456	-0.434731	-0.180899	0.154161	0.0343969	0.399574	0.561521	-0.439376	0.245407	0.571736	-0.0555726	0.243771	0.724301	0.283894	0.300089	0.149833	-0.266936	-0.500063	-0.307271	-0.0773235	0.0230008	-0.178044	-0.323709	0.0319051	-0.521356	-0.145192	-0.264281	0.470454	0.0533463	-0.405561
-4.42984	-0.556	0.599573	-0.366211	-0.727138	0.241205	-0.147364	0.161856	-0.620192	-0.148217	0.8433	-0.485505	0.101618	-0.0302565	-0.339999	-0.0539886	0.0940825	0.338324	0.206085	0.649721	-0.658378	-0.433556	-0.181032	0.15442	0.0341559	0.399969	0.562232	-0.439711	0.243727	0.571023	-0.0549793	0.245099	0.723205	0.281661	0.298007	0.149585	-0.268045	-0.500353	-0.305559	-0.0788671	0.0237105	-0.177609	-0.323299	0.0310146	-0.520164	-0.145935	-0.26417	0.473095	0.0526016	-0.405417
-4.42885	-0.556192	0.598113	-0.367914	-0.726784	0.241443	-0.148392	0.164083	-0.620976	-0.147875	0.845882	-0.485026	0.100472	-0.0307188	-0.339355	-0.0556032	0.0930364	0.340611	0.207299	0.649354	-0.658294	-0.432362	-0.181187	0.154673	0.0339354	0.400356	0.562943	-0.440055	0.242054	0.570286	-0.0543864	0.246437	0.722086	0.279417	0.295913	0.149326	-0.269164	-0.500626	-0.303843	-0.0803988	0.0244266	-0.177164	-0.322895	0.0301281	-0.518967	-0.146685	-0.26406	0.475741	0.0518571	-0.405264
-4.42787	-0.556394	0.596636	-0.369612	-0.726422	0.241691	-0.149413	0.166293	-0.621756	-0.147534	0.848434	-0.484554	0.0993175	-0.0311797	-0.338703	-0.0572377	0.0919832	0.342891	0.208507	0.648996	-0.658203	-0.43115	-0.181364	0.15492	0.0337354	0.400736	0.563654	-0.440407	0.240389	0.569528	-0.0537938	0.247785	0.720943	0.27716	0.293807	0.149054	-0.270296	-0.500883	-0.302121	-0.0819183	0.025149	-0.176709	-0.322496	0.0292458	-0.517766	-0.147443	-0.263953	0.478393	0.0511129	-0.405104
-4.42689	-0.556607	0.595141	-0.371306	-0.726052	0.241949	-0.150428	0.168488	-0.622534	-0.147195	0.850954	-0.484089	0.0981545	-0.0316393	-0.338042	-0.0588919	0.090923	0.345164	0.209708	0.648647	-0.658105	-0.429918	-0.181563	0.155159	0.0335562	0.401109	0.564366	-0.440768	0.238731	0.568747	-0.0532016	0.249142	0.719776	0.274891	0.29169	0.148771	-0.271439	-0.501122	-0.300395	-0.0834254	0.0258775	-0.176243	-0.322102	0.0283675	-0.516559	-0.148208	-0.263849	0.48105	0.0503689	-0.404937
-4.4259	-0.55683	0.593629	-0.372996	-0.725674	0.242217	-0.151437	0.170667	-0.623309	-0.146856	0.853443	-0.483631	0.0969829	-0.0320974	-0.337372	-0.0605658	0.0898558	0.347429	0.210901	0.648306	-0.658001	-0.428667	-0.181783	0.155392	0.0333978	0.401475	0.565078	-0.441137	0.237081	0.567944	-0.0526097	0.250509	0.718585	0.27261	0.28956	0.148475	-0.272593	-0.501345	-0.298664	-0.08492	0.0266121	-0.175767	-0.321714	0.0274934	-0.515349	-0.14898	-0.263747	0.483713	0.0496252	-0.404762
-4.42492	-0.557063	0.592099	-0.374681	-0.725287	0.242495	-0.152441	0.17283	-0.624081	-0.146518	0.855901	-0.483179	0.0958028	-0.032554	-0.336694	-0.0622591	0.0887818	0.349688	0.212088	0.647974	-0.65789	-0.427397	-0.182025	0.155618	0.0332605	0.401835	0.56579	-0.441515	0.235439	0.567119	-0.0520183	0.251886	0.71737	0.270318	0.28742	0.148167	-0.273758	-0.501551	-0.296928	-0.0864019	0.0273526	-0.175281	-0.321332	0.0266233	-0.514134	-0.14976	-0.263647	0.486381	0.0488818	-0.404579
-4.42394	-0.557307	0.590553	-0.376362	-0.724893	0.242782	-0.153438	0.174977	-0.624849	-0.146182	0.858327	-0.482735	0.0946144	-0.033009	-0.336008	-0.0639717	0.087701	0.351938	0.213267	0.64765	-0.657772	-0.426109	-0.182288	0.155837	0.0331442	0.402187	0.566502	-0.441902	0.233806	0.566272	-0.0514272	0.253273	0.716132	0.268014	0.285267	0.147848	-0.274935	-0.50174	-0.295189	-0.0878709	0.0280988	-0.174786	-0.320955	0.0257573	-0.512915	-0.150547	-0.26355	0.489054	0.0481387	-0.404389
-4.42296	-0.557562	0.588989	-0.378039	-0.72449	0.243079	-0.154428	0.177107	-0.625614	-0.145847	0.860721	-0.482297	0.0934178	-0.0334623	-0.335313	-0.0657035	0.0866134	0.354182	0.214439	0.647335	-0.657648	-0.424802	-0.182573	0.156049	0.0330492	0.402532	0.567215	-0.442297	0.23218	0.565404	-0.0508366	0.254669	0.714869	0.265699	0.283103	0.147516	-0.276123	-0.501912	-0.293446	-0.0893267	0.0288507	-0.17428	-0.320584	0.0248954	-0.511692	-0.151342	-0.263455	0.491731	0.047396	-0.404192
-4.42197	-0.557827	0.587409	-0.37971	-0.724079	0.243385	-0.155413	0.17922	-0.626376	-0.145514	0.863084	-0.481867	0.0922132	-0.0339139	-0.334609	-0.0674543	0.0855191	0.356417	0.215603	0.647028	-0.657518	-0.423476	-0.182879	0.156254	0.0329756	0.402871	0.567928	-0.442701	0.230563	0.564513	-0.0502464	0.256074	0.713584	0.263372	0.280928	0.147172	-0.277322	-0.502068	-0.291699	-0.0907693	0.029608	-0.173765	-0.320219	0.0240375	-0.510464	-0.152144	-0.263362	0.494412	0.0466537	-0.403987
-4.42099	-0.558103	0.585812	-0.381377	-0.72366	0.243701	-0.156392	0.181316	-0.627133	-0.145183	0.865414	-0.481443	0.0910005	-0.0343637	-0.333898	-0.0692241	0.0844182	0.358644	0.21676	0.646729	-0.657381	-0.422132	-0.183206	0.156453	0.0329234	0.403202	0.568641	-0.443113	0.228954	0.563602	-0.0496566	0.257489	0.712275	0.261035	0.278741	0.146817	-0.278531	-0.502207	-0.289949	-0.0921985	0.0303708	-0.17324	-0.31986	0.0231836	-0.509233	-0.152954	-0.263272	0.497098	0.0459117	-0.403775
-4.42001	-0.55839	0.584198	-0.383039	-0.723234	0.244026	-0.157364	0.183395	-0.627887	-0.144853	0.867712	-0.481027	0.08978	-0.0348115	-0.333177	-0.0710125	0.0833108	0.360863	0.217909	0.646439	-0.657237	-0.420769	-0.183555	0.156644	0.0328929	0.403527	0.569356	-0.443534	0.227353	0.562669	-0.0490673	0.258913	0.710942	0.258687	0.276544	0.146449	-0.279752	-0.502329	-0.288196	-0.093614	0.0311388	-0.172705	-0.319506	0.0223338	-0.507998	-0.153771	-0.263184	0.499788	0.0451702	-0.403555
-4.41902	-0.558687	0.582568	-0.384696	-0.722799	0.244359	-0.15833	0.185458	-0.628637	-0.144525	0.869977	-0.480618	0.0885518	-0.0352574	-0.332449	-0.0728195	0.0821969	0.363074	0.21905	0.646158	-0.657087	-0.419388	-0.183925	0.156829	0.0328841	0.403844	0.57007	-0.443963	0.225762	0.561714	-0.0484784	0.260347	0.709586	0.256328	0.274334	0.14607	-0.280983	-0.502435	-0.286439	-0.0950157	0.0319119	-0.172162	-0.319158	0.021488	-0.506759	-0.154596	-0.263098	0.502481	0.0444292	-0.403329
-4.41804	-0.558996	0.580922	-0.386348	-0.722357	0.244702	-0.15929	0.187502	-0.629382	-0.144199	0.87221	-0.480216	0.0873161	-0.0357013	-0.331713	-0.074645	0.0810766	0.365276	0.220183	0.645884	-0.656931	-0.417988	-0.184315	0.157006	0.0328971	0.404155	0.570786	-0.444401	0.224179	0.560739	-0.04789	0.261789	0.708206	0.253958	0.272114	0.145678	-0.282225	-0.502524	-0.28468	-0.0964034	0.0326901	-0.171609	-0.318816	0.0206461	-0.505516	-0.155429	-0.263014	0.505177	0.0436886	-0.403094
-4.41706	-0.559315	0.57926	-0.387994	-0.721907	0.245053	-0.160244	0.18953	-0.630123	-0.143876	0.874409	-0.479821	0.0860728	-0.036143	-0.330968	-0.0764887	0.0799499	0.367469	0.221309	0.645619	-0.656768	-0.416571	-0.184727	0.157176	0.0329321	0.404458	0.571502	-0.444847	0.222605	0.559743	-0.0473021	0.263241	0.706803	0.251579	0.269883	0.145275	-0.283477	-0.502596	-0.282919	-0.0977769	0.033473	-0.171046	-0.31848	0.0198082	-0.504269	-0.156269	-0.262932	0.507877	0.0429485	-0.402853
-4.41607	-0.559645	0.577583	-0.389635	-0.721449	0.245412	-0.161191	0.191539	-0.63086	-0.143554	0.876576	-0.479433	0.0848222	-0.0365826	-0.330215	-0.0783504	0.0788171	0.369654	0.222426	0.645363	-0.656599	-0.415135	-0.18516	0.15734	0.0329892	0.404755	0.572219	-0.445302	0.22104	0.558726	-0.0467147	0.264701	0.705377	0.249189	0.267641	0.14486	-0.284739	-0.502652	-0.281155	-0.0991361	0.0342607	-0.170475	-0.318149	0.0189742	-0.503019	-0.157117	-0.262852	0.51058	0.0422089	-0.402604
-4.41509	-0.559985	0.575889	-0.391271	-0.720984	0.24578	-0.162132	0.193531	-0.631592	-0.143235	0.878709	-0.479052	0.0835644	-0.0370199	-0.329454	-0.0802301	0.077678	0.371829	0.223536	0.645114	-0.656423	-0.413681	-0.185613	0.157496	0.0330684	0.405045	0.572937	-0.445766	0.219484	0.557688	-0.0461278	0.26617	0.703927	0.246789	0.265388	0.144433	-0.286012	-0.502691	-0.279389	-0.100481	0.035053	-0.169895	-0.317825	0.0181441	-0.501766	-0.157973	-0.262774	0.513285	0.0414699	-0.402349
-4.41411	-0.560337	0.57418	-0.392901	-0.72051	0.246157	-0.163067	0.195505	-0.63232	-0.142918	0.880809	-0.478679	0.0822996	-0.037455	-0.328686	-0.0821276	0.0765328	0.373995	0.224637	0.644874	-0.656242	-0.41221	-0.186087	0.157645	0.0331699	0.405328	0.573655	-0.446237	0.217938	0.55663	-0.0455415	0.267648	0.702455	0.244379	0.263124	0.143994	-0.287295	-0.502713	-0.277622	-0.101811	0.0358497	-0.169306	-0.317507	0.017318	-0.500509	-0.158836	-0.262699	0.515993	0.0407315	-0.402086
-4.41313	-0.560699	0.572456	-0.394525	-0.72003	0.246541	-0.163996	0.197461	-0.633042	-0.142604	0.882875	-0.478313	0.0810278	-0.0378876	-0.327909	-0.0840426	0.0753817	0.376152	0.22573	0.644642	-0.656053	-0.410721	-0.186582	0.157787	0.0332937	0.405603	0.574375	-0.446718	0.2164	0.555552	-0.0449556	0.269135	0.700959	0.241959	0.260849	0.143543	-0.288588	-0.502719	-0.275853	-0.103126	0.0366508	-0.168708	-0.317195	0.0164956	-0.499249	-0.159708	-0.262625	0.518703	0.0399936	-0.401816
-4.41214	-0.561073	0.570717	-0.396144	-0.719542	0.246933	-0.164918	0.199399	-0.633759	-0.142293	0.884908	-0.477955	0.0797492	-0.0383177	-0.327125	-0.085975	0.0742246	0.3783	0.226814	0.644419	-0.655859	-0.409214	-0.187097	0.157922	0.03344	0.405872	0.575096	-0.447206	0.214873	0.554453	-0.0443704	0.27063	0.699441	0.23953	0.258564	0.14308	-0.289891	-0.502709	-0.274083	-0.104426	0.037456	-0.168102	-0.316888	0.0156772	-0.497986	-0.160586	-0.262553	0.521416	0.0392564	-0.401538
-4.41116	-0.561457	0.568962	-0.397757	-0.719046	0.247333	-0.165834	0.201318	-0.634472	-0.141985	0.886907	-0.477604	0.0784639	-0.0387453	-0.326333	-0.0879246	0.0730616	0.380437	0.22789	0.644203	-0.655658	-0.407689	-0.187633	0.15805	0.0336088	0.406134	0.575817	-0.447703	0.213354	0.553335	-0.0437857	0.272134	0.6979	0.237092	0.256268	0.142606	-0.291204	-0.502682	-0.272312	-0.105711	0.0382653	-0.167488	-0.316588	0.0148625	-0.49672	-0.161473	-0.262484	0.524129	0.0385199	-0.401254
-4.41018	-0.561852	0.567193	-0.399364	-0.718543	0.24774	-0.166744	0.203218	-0.635179	-0.141679	0.888871	-0.47726	0.0771721	-0.0391704	-0.325533	-0.0898913	0.0718928	0.382565	0.228957	0.643995	-0.655451	-0.406147	-0.188189	0.158171	0.0338003	0.406389	0.57654	-0.448209	0.211846	0.552197	-0.0432016	0.273646	0.696336	0.234644	0.253962	0.14212	-0.292526	-0.502639	-0.270539	-0.106981	0.0390785	-0.166865	-0.316294	0.0140516	-0.495451	-0.162367	-0.262416	0.526845	0.037784	-0.400963
-4.40919	-0.562259	0.565409	-0.400965	-0.718033	0.248155	-0.167647	0.2051	-0.63588	-0.141376	0.890802	-0.476923	0.0758738	-0.0395928	-0.324725	-0.0918748	0.0707184	0.384683	0.230016	0.643796	-0.655238	-0.404588	-0.188765	0.158285	0.0340145	0.406638	0.577264	-0.448722	0.210347	0.551038	-0.0426181	0.275166	0.694749	0.232188	0.251645	0.141622	-0.293858	-0.50258	-0.268767	-0.108235	0.0398954	-0.166234	-0.316006	0.0132444	-0.494179	-0.163269	-0.26235	0.529562	0.0370488	-0.400665
-4.40821	-0.562676	0.563611	-0.40256	-0.717516	0.248577	-0.168544	0.206964	-0.636576	-0.141077	0.892698	-0.476595	0.0745693	-0.0400124	-0.323911	-0.093875	0.0695383	0.386791	0.231066	0.643604	-0.655018	-0.403012	-0.189361	0.158391	0.0342514	0.406879	0.577989	-0.449244	0.208858	0.549861	-0.0420352	0.276695	0.69314	0.229723	0.249318	0.141112	-0.2952	-0.502504	-0.266994	-0.109473	0.040716	-0.165594	-0.315724	0.012441	-0.492904	-0.164179	-0.262286	0.532279	0.0363144	-0.40036
-4.40723	-0.563105	0.561799	-0.404148	-0.716991	0.249007	-0.169434	0.208808	-0.637266	-0.140781	0.894559	-0.476273	0.0732587	-0.0404292	-0.323088	-0.0958916	0.0683528	0.388889	0.232107	0.64342	-0.654793	-0.401419	-0.189977	0.15849	0.0345113	0.407113	0.578716	-0.449774	0.207379	0.548664	-0.0414529	0.278231	0.691508	0.227249	0.246981	0.140591	-0.296551	-0.502412	-0.265221	-0.110696	0.0415401	-0.164947	-0.315449	0.0116412	-0.491626	-0.165097	-0.262224	0.534998	0.0355808	-0.400048
-4.40624	-0.563544	0.559972	-0.40573	-0.71646	0.249443	-0.170318	0.210633	-0.63795	-0.140488	0.896386	-0.47596	0.0719421	-0.0408432	-0.322259	-0.0979246	0.0671618	0.390976	0.23314	0.643244	-0.654561	-0.399808	-0.190614	0.158582	0.0347941	0.407341	0.579443	-0.450313	0.20591	0.547448	-0.0408713	0.279776	0.689854	0.224766	0.244634	0.140057	-0.297911	-0.502304	-0.263448	-0.111902	0.0423675	-0.164292	-0.315179	0.0108451	-0.490346	-0.166022	-0.262164	0.537717	0.0348479	-0.39973
-4.40526	-0.563995	0.558132	-0.407306	-0.715921	0.249886	-0.171196	0.212439	-0.638628	-0.140199	0.898178	-0.475653	0.0706196	-0.0412542	-0.321422	-0.0999736	0.0659654	0.393052	0.234163	0.643076	-0.654323	-0.398181	-0.19127	0.158667	0.0350999	0.407562	0.580173	-0.450859	0.204451	0.546213	-0.0402904	0.281328	0.688178	0.222275	0.242276	0.139513	-0.29928	-0.50218	-0.261676	-0.113093	0.0431982	-0.16363	-0.314916	0.0100526	-0.489063	-0.166955	-0.262105	0.540436	0.0341159	-0.399404
-4.40428	-0.564457	0.556278	-0.408876	-0.715375	0.250335	-0.172067	0.214226	-0.639301	-0.139913	0.899936	-0.475355	0.0692914	-0.0416623	-0.320577	-0.102038	0.0647638	0.395118	0.235178	0.642915	-0.65408	-0.396537	-0.191946	0.158744	0.0354289	0.407775	0.580903	-0.451414	0.203002	0.544959	-0.0397101	0.282888	0.686479	0.219777	0.239909	0.138956	-0.300659	-0.502039	-0.259904	-0.114267	0.0440319	-0.16296	-0.314659	0.00926373	-0.487778	-0.167895	-0.262048	0.543156	0.0333847	-0.399072
-4.40329	-0.564929	0.554411	-0.410439	-0.714822	0.250791	-0.172932	0.215993	-0.639966	-0.139631	0.901658	-0.475064	0.0679577	-0.0420673	-0.319726	-0.104119	0.063557	0.397173	0.236183	0.642763	-0.65383	-0.394877	-0.192641	0.158814	0.035781	0.407982	0.581635	-0.451977	0.201564	0.543686	-0.0391305	0.284456	0.684759	0.21727	0.237531	0.138388	-0.302046	-0.501883	-0.258133	-0.115424	0.0448686	-0.162282	-0.314408	0.00847836	-0.486491	-0.168844	-0.261993	0.545875	0.0326545	-0.398733
-4.40231	-0.565414	0.55253	-0.411995	-0.714263	0.251254	-0.173791	0.217741	-0.640625	-0.139352	0.903345	-0.474781	0.0666185	-0.0424691	-0.318868	-0.106215	0.0623451	0.399217	0.237179	0.642617	-0.653574	-0.3932	-0.193356	0.158877	0.0361563	0.408182	0.582369	-0.452548	0.200136	0.542395	-0.0385516	0.286031	0.683016	0.214755	0.235144	0.137809	-0.303442	-0.50171	-0.256363	-0.116565	0.0457081	-0.161597	-0.314164	0.0076965	-0.485201	-0.1698	-0.26194	0.548594	0.0319251	-0.398388
-4.40133	-0.565909	0.550636	-0.413544	-0.713697	0.251722	-0.174643	0.219469	-0.641278	-0.139078	0.904997	-0.474505	0.0652741	-0.0428678	-0.318003	-0.108326	0.0611283	0.40125	0.238166	0.64248	-0.653312	-0.391506	-0.19409	0.158932	0.0365549	0.408375	0.583105	-0.453127	0.198719	0.541086	-0.0379735	0.287614	0.681252	0.212233	0.232747	0.137218	-0.304847	-0.501522	-0.254595	-0.11769	0.0465502	-0.160905	-0.313926	0.0069181	-0.483909	-0.170764	-0.261888	0.551313	0.0311967	-0.398035
-4.40035	-0.566415	0.548729	-0.415087	-0.713124	0.252196	-0.175488	0.221177	-0.641924	-0.138807	0.906614	-0.474237	0.0639245	-0.0432632	-0.317131	-0.110453	0.0599065	0.403271	0.239143	0.642349	-0.653044	-0.389797	-0.194844	0.15898	0.0369768	0.408562	0.583842	-0.453714	0.197312	0.539758	-0.0373961	0.289204	0.679467	0.209704	0.230341	0.136615	-0.30626	-0.501318	-0.252828	-0.118797	0.0473948	-0.160206	-0.313694	0.00614312	-0.482614	-0.171735	-0.261839	0.55403	0.0304693	-0.397677
-4.39936	-0.566933	0.54681	-0.416623	-0.712544	0.252676	-0.176327	0.222865	-0.642563	-0.138541	0.908195	-0.473977	0.0625699	-0.0436553	-0.316252	-0.112594	0.05868	0.405281	0.240111	0.642226	-0.652771	-0.388072	-0.195617	0.159021	0.0374221	0.408741	0.584581	-0.454309	0.195916	0.538413	-0.0368194	0.290802	0.677659	0.207167	0.227925	0.136001	-0.307682	-0.501098	-0.251063	-0.119887	0.0482419	-0.1595	-0.313469	0.00537152	-0.481318	-0.172714	-0.26179	0.556747	0.0297429	-0.397312
-4.39838	-0.567462	0.544878	-0.418152	-0.711958	0.253162	-0.17716	0.224534	-0.643195	-0.138279	0.909741	-0.473725	0.0612105	-0.0440441	-0.315366	-0.11475	0.0574487	0.407279	0.24107	0.642111	-0.652492	-0.38633	-0.196408	0.159054	0.0378909	0.408914	0.585322	-0.454912	0.19453	0.537049	-0.0362435	0.292406	0.675831	0.204624	0.225499	0.135376	-0.309112	-0.500862	-0.249301	-0.12096	0.0490911	-0.158788	-0.31325	0.00460326	-0.48002	-0.173701	-0.261744	0.559462	0.0290175	-0.39694
-4.3974	-0.568002	0.542933	-0.419675	-0.711365	0.253653	-0.177986	0.226182	-0.64382	-0.138021	0.911251	-0.473481	0.0598464	-0.0444294	-0.314474	-0.11692	0.0562128	0.409265	0.242019	0.642002	-0.652206	-0.384573	-0.197219	0.15908	0.0383832	0.409079	0.586064	-0.455523	0.193156	0.535669	-0.0356685	0.294018	0.673981	0.202073	0.223065	0.134739	-0.310551	-0.500611	-0.24754	-0.122016	0.0499425	-0.158068	-0.313037	0.0038383	-0.47872	-0.174696	-0.261698	0.562175	0.0282932	-0.396562
-4.39641	-0.568553	0.540977	-0.42119	-0.710766	0.254149	-0.178806	0.22781	-0.644438	-0.137767	0.912725	-0.473244	0.0584778	-0.0448111	-0.313576	-0.119104	0.0549724	0.41124	0.242958	0.641901	-0.651915	-0.382801	-0.198048	0.159099	0.038899	0.409238	0.586809	-0.456142	0.191792	0.534271	-0.0350942	0.295636	0.67211	0.199516	0.22062	0.13409	-0.311997	-0.500344	-0.245783	-0.123054	0.0507958	-0.157343	-0.312831	0.00307658	-0.477418	-0.175698	-0.261655	0.564887	0.02757	-0.396177
-4.39543	-0.569115	0.539009	-0.422698	-0.71016	0.254651	-0.179619	0.229418	-0.645048	-0.137518	0.914164	-0.473016	0.0571048	-0.0451894	-0.312671	-0.121303	0.0537276	0.413203	0.243888	0.641807	-0.651619	-0.381013	-0.198896	0.15911	0.0394383	0.40939	0.587556	-0.456769	0.190439	0.532855	-0.0345208	0.297261	0.670218	0.196952	0.218167	0.133431	-0.313451	-0.500061	-0.244028	-0.124074	0.0516509	-0.156611	-0.312631	0.00231807	-0.476114	-0.176708	-0.261613	0.567597	0.026848	-0.395787
-4.39445	-0.569689	0.537028	-0.424198	-0.709548	0.255157	-0.180426	0.231005	-0.645651	-0.137273	0.915566	-0.472795	0.0557275	-0.045564	-0.311759	-0.123515	0.0524784	0.415153	0.244808	0.64172	-0.651316	-0.379209	-0.199762	0.159114	0.0400013	0.409536	0.588304	-0.457403	0.189098	0.531423	-0.0339482	0.298893	0.668305	0.194382	0.215705	0.13276	-0.314914	-0.499763	-0.242276	-0.125077	0.0525077	-0.155872	-0.312438	0.00156271	-0.474809	-0.177725	-0.261573	0.570304	0.0261272	-0.39539
-4.39346	-0.570274	0.535037	-0.425692	-0.70893	0.255668	-0.181226	0.232572	-0.646246	-0.137034	0.916933	-0.472583	0.0543461	-0.045935	-0.310842	-0.125741	0.0512251	0.417091	0.245718	0.641639	-0.651009	-0.377391	-0.200647	0.15911	0.0405879	0.409674	0.589055	-0.458045	0.187767	0.529974	-0.0333765	0.300531	0.666372	0.191807	0.213233	0.132078	-0.316383	-0.49945	-0.240528	-0.126062	0.053366	-0.155128	-0.312251	0.000810462	-0.473502	-0.17875	-0.261534	0.573009	0.0254076	-0.394987
-4.39248	-0.570871	0.533034	-0.427178	-0.708306	0.256183	-0.18202	0.234119	-0.646833	-0.136799	0.918264	-0.472378	0.0529608	-0.0463022	-0.309918	-0.12798	0.0499676	0.419016	0.246618	0.641566	-0.650695	-0.375557	-0.20155	0.159099	0.0411982	0.409806	0.589808	-0.458695	0.186448	0.528508	-0.0328056	0.302176	0.664418	0.189225	0.210753	0.131384	-0.317861	-0.499121	-0.238783	-0.127029	0.0542257	-0.154378	-0.312071	6.12722e-05	-0.472194	-0.179782	-0.261496	0.575711	0.0246892	-0.394577
-4.3915	-0.571479	0.53102	-0.428657	-0.707676	0.256703	-0.182807	0.235644	-0.647412	-0.136568	0.919558	-0.472181	0.0515718	-0.0466656	-0.308989	-0.130232	0.048706	0.420929	0.247508	0.641499	-0.650376	-0.373709	-0.202472	0.15908	0.0418322	0.409931	0.590563	-0.459353	0.18514	0.527026	-0.0322357	0.303827	0.662443	0.186637	0.208263	0.13068	-0.319346	-0.498777	-0.237042	-0.127978	0.0550866	-0.153622	-0.311897	-0.000684909	-0.470884	-0.180822	-0.26146	0.57841	0.0239721	-0.394162
-4.39052	-0.572098	0.528995	-0.430129	-0.70704	0.257227	-0.183588	0.237149	-0.647983	-0.136343	0.920816	-0.471993	0.050179	-0.0470252	-0.308053	-0.132497	0.0474406	0.422829	0.248389	0.641439	-0.650051	-0.371845	-0.203411	0.159054	0.0424899	0.410049	0.591321	-0.460018	0.183844	0.525528	-0.0316667	0.305484	0.660449	0.184044	0.205765	0.129964	-0.320838	-0.498418	-0.235306	-0.128908	0.0559486	-0.15286	-0.31173	-0.00142813	-0.469573	-0.181869	-0.261426	0.581106	0.0232563	-0.39374
-4.38953	-0.572728	0.52696	-0.431593	-0.706397	0.257755	-0.184362	0.238633	-0.648546	-0.136123	0.922038	-0.471812	0.0487829	-0.0473808	-0.307112	-0.134774	0.0461713	0.424717	0.249259	0.641386	-0.649721	-0.369968	-0.204368	0.15902	0.0431714	0.410161	0.592081	-0.460691	0.182559	0.524014	-0.0310986	0.307148	0.658434	0.181446	0.203259	0.129238	-0.322337	-0.498044	-0.233573	-0.12982	0.0568116	-0.152093	-0.311569	-0.00216845	-0.46826	-0.182923	-0.261392	0.583799	0.0225419	-0.393313
-4.38855	-0.57337	0.524914	-0.433049	-0.705749	0.258286	-0.18513	0.240096	-0.649101	-0.135908	0.923224	-0.47164	0.0473833	-0.0477326	-0.306165	-0.137064	0.0448983	0.426591	0.250119	0.641338	-0.649386	-0.368076	-0.205342	0.158979	0.0438766	0.410266	0.592843	-0.461371	0.181285	0.522484	-0.0305315	0.308817	0.6564	0.178842	0.200743	0.1285	-0.323844	-0.497655	-0.231846	-0.130713	0.0576753	-0.151321	-0.311415	-0.00290592	-0.466947	-0.183985	-0.261361	0.586488	0.0218289	-0.39288
-4.38757	-0.574023	0.522858	-0.434498	-0.705095	0.258822	-0.185891	0.241538	-0.649647	-0.135698	0.924373	-0.471476	0.0459807	-0.0480803	-0.305213	-0.139366	0.0436217	0.428452	0.250968	0.641298	-0.649045	-0.366169	-0.206335	0.15893	0.0446056	0.410364	0.593608	-0.462058	0.180023	0.520938	-0.0299654	0.310492	0.654346	0.176234	0.19822	0.127751	-0.325357	-0.497251	-0.230123	-0.131588	0.0585397	-0.150543	-0.311268	-0.00364059	-0.465632	-0.185055	-0.26133	0.589173	0.0211174	-0.39244
-4.38658	-0.574687	0.520792	-0.43594	-0.704436	0.25936	-0.186645	0.242959	-0.650184	-0.135494	0.925486	-0.47132	0.044575	-0.0484239	-0.304255	-0.141679	0.0423415	0.4303	0.251808	0.641263	-0.648699	-0.364249	-0.207344	0.158874	0.0453584	0.410455	0.594375	-0.462753	0.178772	0.519377	-0.0294003	0.312173	0.652272	0.17362	0.195687	0.126991	-0.326878	-0.496832	-0.228405	-0.132444	0.0594047	-0.14976	-0.311127	-0.00437251	-0.464316	-0.186131	-0.261301	0.591853	0.0204073	-0.391995
-4.3856	-0.575362	0.518716	-0.437374	-0.703771	0.259902	-0.187394	0.244359	-0.650713	-0.135295	0.926562	-0.471173	0.0431664	-0.0487635	-0.303292	-0.144005	0.041058	0.432135	0.252637	0.641235	-0.648347	-0.362315	-0.208371	0.158811	0.046135	0.410539	0.595145	-0.463456	0.177534	0.517801	-0.0288362	0.313859	0.650179	0.171003	0.193147	0.126221	-0.328405	-0.496399	-0.226693	-0.133281	0.06027	-0.148973	-0.310992	-0.00510175	-0.462999	-0.187215	-0.261273	0.59453	0.0196987	-0.391544
-4.38462	-0.576049	0.51663	-0.4388	-0.7031	0.260447	-0.188135	0.245738	-0.651233	-0.135101	0.927602	-0.471033	0.0417552	-0.0490988	-0.302323	-0.146341	0.0397711	0.433956	0.253456	0.641213	-0.647991	-0.360367	-0.209415	0.158739	0.0469354	0.410617	0.595918	-0.464165	0.176307	0.51621	-0.0282732	0.315551	0.648067	0.16838	0.190598	0.125439	-0.329938	-0.49595	-0.224986	-0.134098	0.0611355	-0.14818	-0.310865	-0.00582836	-0.461682	-0.188306	-0.261247	0.597202	0.0189917	-0.391088
-4.38363	-0.576748	0.514535	-0.440218	-0.702424	0.260995	-0.18887	0.247095	-0.651744	-0.134913	0.928605	-0.470902	0.0403414	-0.0494299	-0.30135	-0.148689	0.0384811	0.435763	0.254264	0.641196	-0.647629	-0.358406	-0.210476	0.158661	0.0477595	0.410688	0.596693	-0.464882	0.175091	0.514605	-0.0277112	0.317248	0.645935	0.165754	0.188042	0.124647	-0.331478	-0.495487	-0.223285	-0.134897	0.0620011	-0.147383	-0.310743	-0.0065524	-0.460363	-0.189405	-0.261222	0.599869	0.0182862	-0.390625
-4.38265	-0.577457	0.512431	-0.441629	-0.701743	0.261546	-0.189599	0.248431	-0.652246	-0.134731	0.929572	-0.470779	0.0389253	-0.0497568	-0.300371	-0.151048	0.0371879	0.437556	0.255062	0.641186	-0.647262	-0.356431	-0.211554	0.158574	0.0486075	0.410753	0.597471	-0.465606	0.173888	0.512984	-0.0271503	0.31895	0.643785	0.163124	0.185477	0.123844	-0.333024	-0.49501	-0.22159	-0.135677	0.0628666	-0.146582	-0.310629	-0.00727393	-0.459044	-0.19051	-0.261198	0.60253	0.0175824	-0.390158
-4.38167	-0.578178	0.510318	-0.443031	-0.701056	0.262099	-0.190321	0.249745	-0.652738	-0.134555	0.930502	-0.470665	0.037507	-0.0500794	-0.299388	-0.153417	0.0358918	0.439336	0.255849	0.641181	-0.64689	-0.354443	-0.212649	0.15848	0.0494793	0.410811	0.598252	-0.466338	0.172696	0.51135	-0.0265905	0.320657	0.641617	0.16049	0.182904	0.12303	-0.334577	-0.494518	-0.219902	-0.136437	0.0637319	-0.145776	-0.310521	-0.007993	-0.457724	-0.191622	-0.261175	0.605187	0.0168803	-0.389684
-4.38068	-0.578911	0.508196	-0.444426	-0.700364	0.262654	-0.191037	0.251038	-0.653221	-0.134384	0.931395	-0.470559	0.0360866	-0.0503975	-0.298399	-0.155797	0.0345927	0.441102	0.256625	0.641182	-0.646513	-0.352442	-0.21376	0.158379	0.0503748	0.410862	0.599036	-0.467076	0.171517	0.509701	-0.0260318	0.322369	0.639429	0.157852	0.180324	0.122206	-0.336135	-0.494012	-0.21822	-0.137177	0.0645969	-0.144966	-0.31042	-0.00870969	-0.456403	-0.192742	-0.261153	0.607838	0.0161799	-0.389205
-4.3797	-0.579654	0.506066	-0.445813	-0.699667	0.263211	-0.191746	0.25231	-0.653695	-0.134219	0.932252	-0.470461	0.0346643	-0.0507113	-0.297406	-0.158186	0.0332909	0.442853	0.257391	0.641189	-0.646131	-0.350428	-0.214887	0.15827	0.0512941	0.410906	0.599823	-0.467821	0.170349	0.508039	-0.0254743	0.324086	0.637224	0.155211	0.177736	0.121371	-0.337699	-0.493492	-0.216545	-0.137898	0.0654613	-0.144152	-0.310325	-0.00942404	-0.455082	-0.193868	-0.261133	0.610483	0.0154812	-0.388721
-4.37872	-0.580409	0.503927	-0.447192	-0.698965	0.26377	-0.192448	0.25356	-0.654159	-0.13406	0.933072	-0.470372	0.0332403	-0.0510206	-0.296409	-0.160586	0.0319865	0.44459	0.258146	0.641201	-0.645744	-0.348402	-0.216031	0.158153	0.0522371	0.410944	0.600612	-0.468574	0.169194	0.506362	-0.0249179	0.325808	0.635001	0.152567	0.17514	0.120525	-0.339269	-0.492958	-0.214877	-0.138599	0.0663252	-0.143334	-0.310237	-0.0101361	-0.453761	-0.195001	-0.261114	0.613123	0.0147843	-0.388231
-4.37774	-0.581176	0.501781	-0.448564	-0.698257	0.264331	-0.193144	0.254788	-0.654614	-0.133908	0.933855	-0.470291	0.0318147	-0.0513254	-0.295407	-0.162995	0.0306795	0.446313	0.258891	0.641218	-0.645353	-0.346363	-0.217191	0.158029	0.0532039	0.410975	0.601405	-0.469333	0.16805	0.504673	-0.0243628	0.327534	0.632759	0.149919	0.172536	0.119669	-0.340845	-0.49241	-0.213217	-0.139281	0.0671882	-0.142512	-0.310156	-0.010846	-0.452438	-0.196142	-0.261096	0.615756	0.0140893	-0.387736
-4.37675	-0.581953	0.499626	-0.449927	-0.697545	0.264894	-0.193834	0.255994	-0.655058	-0.133761	0.934601	-0.470219	0.0303877	-0.0516256	-0.294401	-0.165413	0.02937	0.448022	0.259625	0.641241	-0.644956	-0.344312	-0.218366	0.157897	0.0541944	0.411	0.602201	-0.470099	0.166919	0.50297	-0.0238088	0.329265	0.6305	0.147269	0.169925	0.118803	-0.342426	-0.491848	-0.211564	-0.139942	0.0680502	-0.141686	-0.310081	-0.0115537	-0.451116	-0.197289	-0.261079	0.618382	0.0133962	-0.387236
-4.37577	-0.582742	0.497464	-0.451282	-0.696829	0.265458	-0.194517	0.257179	-0.655492	-0.133621	0.935311	-0.470155	0.0289595	-0.0519213	-0.293391	-0.16784	0.0280582	0.449715	0.260347	0.641268	-0.644555	-0.342248	-0.219558	0.157758	0.0552085	0.411018	0.603	-0.470872	0.1658	0.501254	-0.0232561	0.331	0.628224	0.144617	0.167307	0.117926	-0.344013	-0.491272	-0.209919	-0.140584	0.0689112	-0.140858	-0.310014	-0.0122594	-0.449793	-0.198442	-0.261063	0.621002	0.0127049	-0.38673
-4.37479	-0.583542	0.495295	-0.452629	-0.696107	0.266023	-0.195193	0.258342	-0.655917	-0.133487	0.935984	-0.4701	0.0275302	-0.0522123	-0.292376	-0.170276	0.0267442	0.451394	0.261059	0.641301	-0.644149	-0.340173	-0.220765	0.157611	0.0562463	0.41103	0.603802	-0.471651	0.164693	0.499526	-0.0227047	0.332739	0.62593	0.141962	0.164682	0.117039	-0.345605	-0.490682	-0.208282	-0.141205	0.0697709	-0.140025	-0.309952	-0.0129631	-0.44847	-0.199603	-0.261049	0.623615	0.0120157	-0.38622
-4.3738	-0.584354	0.493118	-0.453968	-0.695381	0.266589	-0.195864	0.259483	-0.656331	-0.133359	0.936621	-0.470054	0.0261	-0.0524986	-0.291358	-0.172721	0.025428	0.453058	0.26176	0.641338	-0.643738	-0.338086	-0.221987	0.157456	0.0573078	0.411035	0.604607	-0.472437	0.163598	0.497785	-0.0221545	0.334482	0.623619	0.139304	0.162049	0.116141	-0.347201	-0.490079	-0.206653	-0.141807	0.0706293	-0.13919	-0.309898	-0.0136648	-0.447147	-0.20077	-0.261035	0.626221	0.0113285	-0.385704
-4.37282	-0.585177	0.490935	-0.455299	-0.69465	0.267156	-0.196527	0.260602	-0.656735	-0.133238	0.937221	-0.470016	0.0246691	-0.0527801	-0.290336	-0.175173	0.0241099	0.454708	0.26245	0.64138	-0.643323	-0.335987	-0.223225	0.157294	0.0583928	0.411033	0.605416	-0.47323	0.162516	0.496031	-0.0216056	0.336229	0.621291	0.136645	0.159409	0.115233	-0.348803	-0.489462	-0.205033	-0.142387	0.0714861	-0.138352	-0.30985	-0.0143646	-0.445823	-0.201943	-0.261022	0.62882	0.0106433	-0.385184
-4.37184	-0.586011	0.488745	-0.456622	-0.693915	0.267723	-0.197184	0.2617	-0.657128	-0.133123	0.937784	-0.469987	0.0232375	-0.0530569	-0.289311	-0.177634	0.0227898	0.456342	0.263129	0.641427	-0.642903	-0.333877	-0.224478	0.157125	0.0595013	0.411025	0.606228	-0.47403	0.161446	0.494266	-0.0210581	0.337979	0.618947	0.133984	0.156763	0.114316	-0.35041	-0.488832	-0.203422	-0.142948	0.0723413	-0.13751	-0.309809	-0.0150626	-0.444499	-0.203123	-0.261011	0.63141	0.00996022	-0.384658
-4.37085	-0.586856	0.486548	-0.457937	-0.693175	0.26829	-0.197835	0.262775	-0.657511	-0.133015	0.93831	-0.469966	0.0218056	-0.0533289	-0.288281	-0.180102	0.021468	0.45796	0.263797	0.641478	-0.642479	-0.331756	-0.225746	0.156947	0.0606334	0.41101	0.607043	-0.474835	0.160388	0.492489	-0.0205119	0.339733	0.616586	0.131321	0.154109	0.113388	-0.352021	-0.488189	-0.201819	-0.143488	0.0731946	-0.136666	-0.309774	-0.0157589	-0.443176	-0.20431	-0.261	0.633994	0.0092793	-0.384128
-4.36987	-0.587713	0.484345	-0.459243	-0.692432	0.268858	-0.198479	0.263829	-0.657883	-0.132914	0.9388	-0.469954	0.0203734	-0.0535961	-0.287249	-0.182578	0.0201445	0.459564	0.264454	0.641534	-0.64205	-0.329624	-0.227028	0.156762	0.0617888	0.410989	0.607862	-0.475648	0.159343	0.4907	-0.0199671	0.341491	0.61421	0.128657	0.151449	0.11245	-0.353637	-0.487532	-0.200226	-0.144008	0.074046	-0.13582	-0.309747	-0.0164536	-0.441852	-0.205502	-0.260991	0.636569	0.00860059	-0.383592
-4.36889	-0.58858	0.482136	-0.460542	-0.691683	0.269426	-0.199117	0.26486	-0.658245	-0.132819	0.939253	-0.469951	0.0189412	-0.0538584	-0.286213	-0.185061	0.0188194	0.461152	0.2651	0.641594	-0.641617	-0.327482	-0.228325	0.15657	0.0629677	0.410961	0.608684	-0.476466	0.15831	0.488899	-0.0194237	0.343252	0.611817	0.125992	0.148782	0.111502	-0.355257	-0.486863	-0.198643	-0.144506	0.0748952	-0.134971	-0.309726	-0.0171466	-0.440529	-0.206702	-0.260982	0.639136	0.00792413	-0.383052
-4.36791	-0.589459	0.479922	-0.461832	-0.690931	0.269994	-0.199749	0.26587	-0.658595	-0.132732	0.939669	-0.469957	0.017509	-0.0541157	-0.285174	-0.18755	0.0174929	0.462725	0.265734	0.641658	-0.64118	-0.325328	-0.229637	0.156369	0.06417	0.410927	0.60951	-0.477291	0.15729	0.487088	-0.0188817	0.345015	0.609408	0.123326	0.146108	0.110544	-0.356882	-0.48618	-0.197069	-0.144985	0.0757422	-0.13412	-0.309711	-0.0178381	-0.439205	-0.207907	-0.260974	0.641694	0.00724996	-0.382508
-4.36692	-0.59035	0.477702	-0.463114	-0.690175	0.270561	-0.200374	0.266857	-0.658935	-0.132651	0.940049	-0.469972	0.0160771	-0.0543681	-0.284132	-0.190046	0.0161651	0.464282	0.266358	0.641726	-0.640738	-0.323164	-0.230963	0.156162	0.0653955	0.410887	0.610339	-0.478122	0.156282	0.485266	-0.0183411	0.346782	0.606984	0.120659	0.143428	0.109576	-0.35851	-0.485485	-0.195505	-0.145442	0.0765868	-0.133266	-0.309704	-0.0185281	-0.437882	-0.209118	-0.260968	0.644244	0.00657813	-0.381958
-4.36594	-0.591251	0.475476	-0.464388	-0.689415	0.271128	-0.200992	0.267822	-0.659263	-0.132576	0.940392	-0.469995	0.0146456	-0.0546154	-0.283087	-0.192548	0.0148361	0.465823	0.26697	0.641798	-0.640292	-0.32099	-0.232303	0.155946	0.0666443	0.41084	0.611172	-0.47896	0.155287	0.483433	-0.017802	0.348552	0.604544	0.117991	0.140742	0.108599	-0.360143	-0.484777	-0.193952	-0.145878	0.0774289	-0.132411	-0.309703	-0.0192168	-0.436559	-0.210336	-0.260962	0.646785	0.00590869	-0.381404
-4.36496	-0.592163	0.473246	-0.465654	-0.688651	0.271693	-0.201604	0.268766	-0.65958	-0.132509	0.940699	-0.470027	0.0132148	-0.0548578	-0.28204	-0.195056	0.0135059	0.467348	0.267571	0.641874	-0.639843	-0.318807	-0.233657	0.155723	0.0679162	0.410786	0.612009	-0.479803	0.154304	0.481589	-0.0172644	0.350325	0.60209	0.115323	0.138049	0.107612	-0.36178	-0.484057	-0.192409	-0.146294	0.0782682	-0.131554	-0.309708	-0.0199042	-0.435237	-0.211559	-0.260957	0.649316	0.0052417	-0.380846
-4.36397	-0.593087	0.47101	-0.466911	-0.687883	0.272258	-0.20221	0.269687	-0.659886	-0.132449	0.940969	-0.470068	0.0117846	-0.0550951	-0.28099	-0.19757	0.0121748	0.468858	0.26816	0.641953	-0.639389	-0.316613	-0.235024	0.155492	0.0692113	0.410727	0.612849	-0.480652	0.153333	0.479736	-0.0167284	0.3521	0.59962	0.112655	0.13535	0.106615	-0.36342	-0.483324	-0.190877	-0.146688	0.0791047	-0.130695	-0.309721	-0.0205903	-0.433914	-0.212788	-0.260953	0.651839	0.0045772	-0.380283
-4.36299	-0.594022	0.468771	-0.468161	-0.687112	0.272822	-0.202809	0.270586	-0.660181	-0.132396	0.941203	-0.470118	0.0103554	-0.0553273	-0.279937	-0.200089	0.0108427	0.470351	0.268739	0.642036	-0.638931	-0.31441	-0.236406	0.155254	0.0705294	0.41066	0.613693	-0.481508	0.152376	0.477872	-0.0161939	0.353877	0.597136	0.109987	0.132645	0.105609	-0.365064	-0.482579	-0.189355	-0.147062	0.0799382	-0.129834	-0.30974	-0.0212753	-0.432592	-0.214024	-0.260949	0.654352	0.00391524	-0.379716
-4.36201	-0.594968	0.466526	-0.469402	-0.686336	0.273384	-0.203402	0.271463	-0.660464	-0.132351	0.941401	-0.470177	0.00892737	-0.0555543	-0.278883	-0.202613	0.00950997	0.471828	0.269306	0.642122	-0.638469	-0.312197	-0.2378	0.155008	0.0718704	0.410588	0.61454	-0.482369	0.15143	0.475999	-0.0156609	0.355657	0.594637	0.107319	0.129934	0.104593	-0.366711	-0.481821	-0.187845	-0.147414	0.0807686	-0.128972	-0.309766	-0.0219591	-0.431271	-0.215264	-0.260947	0.656855	0.00325587	-0.379144
-4.36102	-0.595925	0.464278	-0.470635	-0.685558	0.273945	-0.203989	0.272318	-0.660735	-0.132312	0.941562	-0.470245	0.00750056	-0.0557762	-0.277826	-0.205142	0.00817654	0.473289	0.269861	0.642212	-0.638003	-0.309975	-0.239208	0.154755	0.0732343	0.410509	0.615392	-0.483236	0.150498	0.474116	-0.0151295	0.357439	0.592125	0.104651	0.127217	0.103567	-0.368361	-0.481052	-0.186347	-0.147745	0.0815957	-0.128109	-0.309798	-0.022642	-0.42995	-0.216511	-0.260945	0.659348	0.00259915	-0.378569
-4.36004	-0.596893	0.462025	-0.47186	-0.684776	0.274504	-0.204569	0.27315	-0.660995	-0.132281	0.941687	-0.470322	0.00607519	-0.0559929	-0.276767	-0.207675	0.00684259	0.474734	0.270405	0.642304	-0.637534	-0.307745	-0.240629	0.154494	0.0746211	0.410424	0.616247	-0.484109	0.149578	0.472224	-0.0145998	0.359223	0.589598	0.101984	0.124495	0.102533	-0.370015	-0.48027	-0.18486	-0.148055	0.0824193	-0.127245	-0.309838	-0.023324	-0.428629	-0.217763	-0.260944	0.661831	0.00194512	-0.377989
-4.35906	-0.597872	0.459769	-0.473076	-0.68399	0.275061	-0.205143	0.273961	-0.661242	-0.132257	0.941776	-0.470408	0.00465144	-0.0562044	-0.275706	-0.210213	0.00550821	0.476162	0.270938	0.642399	-0.637061	-0.305505	-0.242063	0.154225	0.0760305	0.410332	0.617107	-0.484987	0.14867	0.470323	-0.0140717	0.361008	0.587058	0.0993183	0.121766	0.101489	-0.371672	-0.479477	-0.183384	-0.148343	0.0832394	-0.12638	-0.309883	-0.024005	-0.427309	-0.219021	-0.260944	0.664303	0.00129384	-0.377405
-4.35807	-0.598862	0.45751	-0.474284	-0.683202	0.275616	-0.205711	0.274749	-0.661478	-0.13224	0.941829	-0.470503	0.00322947	-0.0564106	-0.274644	-0.212754	0.00417353	0.477574	0.27146	0.642498	-0.636584	-0.303258	-0.24351	0.153949	0.0774626	0.410234	0.61797	-0.485871	0.147775	0.468413	-0.0135453	0.362795	0.584504	0.0966533	0.119032	0.100435	-0.373331	-0.478672	-0.181921	-0.148611	0.0840558	-0.125514	-0.309936	-0.0246854	-0.42599	-0.220284	-0.260945	0.666765	0.000645366	-0.376817
-4.35709	-0.599863	0.455247	-0.475484	-0.68241	0.276168	-0.206273	0.275516	-0.661702	-0.132231	0.941846	-0.470607	0.00180945	-0.0566116	-0.273579	-0.215299	0.00283866	0.478969	0.27197	0.642599	-0.636103	-0.301001	-0.244969	0.153666	0.0789173	0.41013	0.618837	-0.486761	0.146893	0.466494	-0.0130205	0.364584	0.581938	0.0939895	0.116293	0.0993729	-0.374994	-0.477855	-0.180471	-0.148856	0.0848683	-0.124647	-0.309995	-0.025365	-0.424671	-0.221552	-0.260946	0.669216	-2.55655e-07	-0.376224
-4.35611	-0.600875	0.452982	-0.476676	-0.681615	0.276718	-0.206828	0.27626	-0.661914	-0.132229	0.941827	-0.470721	0.000391559	-0.0568072	-0.272514	-0.217847	0.00150372	0.480347	0.272468	0.642702	-0.635619	-0.298737	-0.246441	0.153374	0.0803944	0.41002	0.619708	-0.487656	0.146024	0.464567	-0.0124975	0.366374	0.579358	0.0913271	0.113548	0.0983014	-0.376659	-0.477027	-0.179033	-0.14908	0.0856768	-0.12378	-0.310061	-0.026044	-0.423353	-0.222825	-0.260948	0.671656	-0.000642969	-0.375628
-4.35513	-0.601898	0.450713	-0.47786	-0.680817	0.277265	-0.207377	0.276982	-0.662113	-0.132235	0.941772	-0.470843	-0.00102404	-0.0569975	-0.271447	-0.220398	0.000168823	0.481708	0.272955	0.642808	-0.635131	-0.296465	-0.247925	0.153076	0.0818939	0.409903	0.620583	-0.488556	0.145167	0.462633	-0.0119762	0.368166	0.576765	0.0886664	0.110797	0.0972208	-0.378326	-0.476187	-0.177607	-0.149283	0.0864811	-0.122912	-0.310133	-0.0267224	-0.422035	-0.224104	-0.260951	0.674085	-0.00128272	-0.375029
-4.35414	-0.602932	0.448443	-0.479035	-0.680017	0.27781	-0.207919	0.277682	-0.6623	-0.132248	0.941681	-0.470975	-0.00243717	-0.0571825	-0.270379	-0.222952	-0.00116592	0.483053	0.27343	0.642916	-0.63464	-0.294185	-0.24942	0.152769	0.0834157	0.409781	0.621462	-0.489462	0.144323	0.46069	-0.0114567	0.369958	0.57416	0.0860076	0.108042	0.0961314	-0.379996	-0.475337	-0.176195	-0.149464	0.0872812	-0.122045	-0.310212	-0.0274004	-0.420719	-0.225388	-0.260954	0.676502	-0.00191945	-0.374425
-4.35316	-0.603977	0.44617	-0.480203	-0.679213	0.278351	-0.208456	0.27836	-0.662475	-0.132269	0.941555	-0.471115	-0.00384766	-0.0573621	-0.26931	-0.225508	-0.00250039	0.48438	0.273894	0.643027	-0.634146	-0.291898	-0.250928	0.152455	0.0849596	0.409652	0.622346	-0.490373	0.143491	0.45874	-0.010939	0.371752	0.571543	0.0833508	0.105282	0.095033	-0.381668	-0.474475	-0.174796	-0.149623	0.0880768	-0.121177	-0.310298	-0.028078	-0.419403	-0.226676	-0.260958	0.678908	-0.00255311	-0.373818
-4.35218	-0.605032	0.443894	-0.481362	-0.678407	0.278889	-0.208986	0.279016	-0.662638	-0.132298	0.941393	-0.471265	-0.00525535	-0.0575363	-0.26824	-0.228066	-0.00383447	0.485691	0.274347	0.643139	-0.633648	-0.289603	-0.252447	0.152134	0.0865256	0.409516	0.623233	-0.491289	0.142672	0.456782	-0.0104232	0.373546	0.568914	0.0806963	0.102516	0.0939259	-0.383342	-0.473603	-0.17341	-0.149761	0.0888679	-0.120309	-0.31039	-0.0287553	-0.418088	-0.22797	-0.260963	0.681302	-0.00318364	-0.373207
-4.35119	-0.606099	0.441618	-0.482513	-0.677598	0.279423	-0.20951	0.27965	-0.662787	-0.132334	0.941195	-0.471424	-0.00666005	-0.057705	-0.26717	-0.230625	-0.00516805	0.486984	0.274788	0.643253	-0.633148	-0.287302	-0.253978	0.151805	0.0881135	0.409375	0.624124	-0.49221	0.141866	0.454818	-0.00990913	0.37534	0.566274	0.0780443	0.0997455	0.0928101	-0.385017	-0.472719	-0.172038	-0.149877	0.0896542	-0.119441	-0.310489	-0.0294324	-0.416773	-0.229268	-0.260968	0.683683	-0.00381098	-0.372592
-4.35021	-0.607176	0.439339	-0.483656	-0.676787	0.279953	-0.210028	0.280261	-0.662924	-0.132378	0.940962	-0.471593	-0.00806161	-0.0578684	-0.266099	-0.233186	-0.00650102	0.48826	0.275217	0.643369	-0.632644	-0.284993	-0.25552	0.151468	0.0897233	0.409228	0.62502	-0.493137	0.141072	0.452846	-0.00939698	0.377135	0.563622	0.0753949	0.0969702	0.0916856	-0.386695	-0.471825	-0.17068	-0.149971	0.0904356	-0.118574	-0.310595	-0.0301094	-0.41546	-0.230571	-0.260973	0.686053	-0.00443508	-0.371974
-4.34923	-0.608263	0.437059	-0.484791	-0.675973	0.28048	-0.21054	0.280851	-0.663049	-0.13243	0.940694	-0.471771	-0.00945984	-0.0580262	-0.265028	-0.235749	-0.00783325	0.489518	0.275635	0.643487	-0.632136	-0.282679	-0.257073	0.151124	0.0913548	0.409074	0.62592	-0.494068	0.140291	0.450868	-0.00888673	0.378931	0.560958	0.0727484	0.0941903	0.0905525	-0.388374	-0.470921	-0.169336	-0.150043	0.091212	-0.117707	-0.310707	-0.0307863	-0.414148	-0.231878	-0.26098	0.68841	-0.00505588	-0.371353
-4.34824	-0.609362	0.434779	-0.485917	-0.675157	0.281003	-0.211046	0.281419	-0.66316	-0.13249	0.940391	-0.471958	-0.0108546	-0.0581786	-0.263956	-0.238311	-0.00916463	0.490759	0.276041	0.643606	-0.631626	-0.280357	-0.258637	0.150773	0.093008	0.408914	0.626824	-0.495004	0.139522	0.448884	-0.00837841	0.380726	0.558284	0.070105	0.0914057	0.089411	-0.390055	-0.470006	-0.168006	-0.150094	0.0919833	-0.116841	-0.310825	-0.0314633	-0.412836	-0.23319	-0.260987	0.690754	-0.00567333	-0.370728
-4.34726	-0.610471	0.432497	-0.487036	-0.674338	0.281521	-0.211545	0.281965	-0.663259	-0.132557	0.940052	-0.472154	-0.0122456	-0.0583255	-0.262884	-0.240875	-0.0104951	0.491982	0.276436	0.643726	-0.631113	-0.27803	-0.260212	0.150414	0.0946826	0.408749	0.627732	-0.495945	0.138767	0.446893	-0.00787205	0.382522	0.555599	0.0674648	0.0886166	0.0882611	-0.391737	-0.46908	-0.166691	-0.150123	0.0927493	-0.115976	-0.31095	-0.0321403	-0.411526	-0.234506	-0.260994	0.693086	-0.00628735	-0.3701
-4.34628	-0.611591	0.430215	-0.488146	-0.673518	0.282035	-0.212039	0.282489	-0.663345	-0.132632	0.939679	-0.47236	-0.0136329	-0.0584669	-0.261813	-0.243438	-0.0118244	0.493188	0.276819	0.643848	-0.630597	-0.275697	-0.261798	0.150048	0.0963786	0.408577	0.628644	-0.496891	0.138023	0.444897	-0.00736767	0.384317	0.552904	0.0648282	0.0858231	0.0871028	-0.39342	-0.468145	-0.165391	-0.150129	0.0935098	-0.115112	-0.311082	-0.0328176	-0.410216	-0.235826	-0.261002	0.695404	-0.00689791	-0.369469
-4.3453	-0.612721	0.427932	-0.489249	-0.672695	0.282544	-0.212526	0.282991	-0.663418	-0.132716	0.939271	-0.472575	-0.0150161	-0.0586028	-0.260741	-0.246002	-0.0131526	0.494376	0.277191	0.64397	-0.630078	-0.273358	-0.263394	0.149674	0.0980958	0.408399	0.629561	-0.497841	0.137293	0.442895	-0.00686531	0.386112	0.550199	0.0621953	0.0830253	0.0859363	-0.395104	-0.4672	-0.164106	-0.150114	0.0942647	-0.114248	-0.31122	-0.0334951	-0.408908	-0.237151	-0.26101	0.69771	-0.00750492	-0.368834
-4.34431	-0.613862	0.425649	-0.490343	-0.67187	0.283049	-0.213007	0.283471	-0.663477	-0.132807	0.938828	-0.472799	-0.0163952	-0.0587331	-0.25967	-0.248564	-0.0144794	0.495547	0.277551	0.644093	-0.629557	-0.271013	-0.265	0.149293	0.0998342	0.408215	0.630482	-0.498796	0.136574	0.440888	-0.00636498	0.387906	0.547484	0.0595662	0.0802232	0.0847616	-0.396789	-0.466245	-0.162836	-0.150077	0.095014	-0.113386	-0.311364	-0.034173	-0.407601	-0.238479	-0.261019	0.700001	-0.00810835	-0.368196
-4.34333	-0.615013	0.423367	-0.49143	-0.671044	0.283548	-0.213483	0.283929	-0.663524	-0.132906	0.93835	-0.473033	-0.0177699	-0.0588579	-0.2586	-0.251126	-0.0158049	0.496699	0.277899	0.644217	-0.629032	-0.268664	-0.266616	0.148904	0.101594	0.408026	0.631407	-0.499756	0.135869	0.438875	-0.00586671	0.3897	0.544759	0.0569413	0.0774171	0.0835788	-0.398475	-0.46528	-0.161581	-0.150019	0.0957573	-0.112525	-0.311515	-0.0348514	-0.406294	-0.239812	-0.261028	0.70228	-0.00870812	-0.367556
-4.34235	-0.616175	0.421085	-0.492509	-0.670215	0.284042	-0.213952	0.284366	-0.663557	-0.133013	0.937838	-0.473277	-0.01914	-0.058977	-0.25753	-0.253687	-0.0171288	0.497834	0.278236	0.644342	-0.628505	-0.266309	-0.268242	0.148508	0.103374	0.40783	0.632337	-0.50072	0.135176	0.436858	-0.00537054	0.391492	0.542025	0.0543207	0.074607	0.0823881	-0.400161	-0.464306	-0.160342	-0.149938	0.0964947	-0.111666	-0.311673	-0.0355302	-0.404989	-0.241148	-0.261037	0.704544	-0.00930418	-0.366912
-4.34136	-0.617347	0.418803	-0.493579	-0.669385	0.284531	-0.214416	0.284781	-0.663576	-0.133128	0.937292	-0.47353	-0.0205055	-0.0590906	-0.256461	-0.256246	-0.018451	0.49895	0.278562	0.644467	-0.627976	-0.26395	-0.269877	0.148105	0.105175	0.407628	0.633271	-0.501688	0.134495	0.434836	-0.00487648	0.393284	0.539282	0.0517045	0.0717929	0.0811894	-0.401848	-0.463322	-0.159118	-0.149835	0.0972259	-0.110808	-0.311837	-0.0362098	-0.403685	-0.242488	-0.261047	0.706794	-0.00989646	-0.366265
-4.34038	-0.61853	0.416522	-0.494642	-0.668553	0.285014	-0.214873	0.285174	-0.663583	-0.133251	0.936711	-0.473792	-0.0218662	-0.0591987	-0.255393	-0.258804	-0.0197715	0.500048	0.278875	0.644592	-0.627444	-0.261586	-0.271522	0.147694	0.106996	0.407421	0.634209	-0.502661	0.133827	0.432809	-0.00438458	0.395075	0.53653	0.0490931	0.068975	0.0799829	-0.403536	-0.462329	-0.157911	-0.14971	0.0979509	-0.109952	-0.312007	-0.03689	-0.402382	-0.243832	-0.261057	0.70903	-0.0104849	-0.365616
-4.3394	-0.619722	0.414242	-0.495697	-0.66772	0.285492	-0.215325	0.285546	-0.663576	-0.133382	0.936096	-0.474064	-0.0232218	-0.0593011	-0.254327	-0.261359	-0.0210901	0.501128	0.279178	0.644718	-0.62691	-0.259218	-0.273176	0.147276	0.108838	0.407208	0.635151	-0.503638	0.133171	0.430779	-0.00389484	0.396864	0.53377	0.0464866	0.0661535	0.0787686	-0.405223	-0.461327	-0.156719	-0.149563	0.0986694	-0.109098	-0.312184	-0.037571	-0.401081	-0.245179	-0.261068	0.711252	-0.0110695	-0.364964
-4.33841	-0.620925	0.411963	-0.496744	-0.666885	0.285963	-0.215771	0.285896	-0.663555	-0.133522	0.935448	-0.474345	-0.0245722	-0.0593979	-0.253261	-0.263912	-0.0224068	0.50219	0.279468	0.644843	-0.626373	-0.256845	-0.27484	0.14685	0.1107	0.406988	0.636098	-0.504619	0.132528	0.428744	-0.00340731	0.398652	0.531002	0.0438853	0.0633283	0.0775467	-0.406911	-0.460317	-0.155545	-0.149394	0.0993813	-0.108246	-0.312367	-0.0382529	-0.39978	-0.24653	-0.261079	0.71346	-0.01165	-0.364309
-4.33743	-0.622139	0.409686	-0.497783	-0.666049	0.286428	-0.21621	0.286224	-0.663521	-0.133669	0.934766	-0.474636	-0.0259172	-0.0594891	-0.252197	-0.266462	-0.0237213	0.503234	0.279748	0.644968	-0.625834	-0.254469	-0.276512	0.146417	0.112583	0.406763	0.637049	-0.505604	0.131897	0.426706	-0.002922	0.400438	0.528225	0.0412892	0.0604996	0.0763171	-0.408598	-0.459297	-0.154386	-0.149203	0.100087	-0.107396	-0.312556	-0.0389357	-0.398481	-0.247883	-0.26109	0.715652	-0.0122266	-0.363651
-4.33645	-0.623362	0.407411	-0.498815	-0.665212	0.286887	-0.216644	0.286531	-0.663473	-0.133824	0.93405	-0.474937	-0.0272567	-0.0595746	-0.251135	-0.269009	-0.0250336	0.504259	0.280015	0.645093	-0.625293	-0.252089	-0.278193	0.145977	0.114485	0.406532	0.638005	-0.506593	0.131279	0.424664	-0.00243895	0.402222	0.525441	0.0386987	0.0576675	0.0750801	-0.410285	-0.458268	-0.153245	-0.148991	0.100785	-0.106548	-0.312752	-0.0396196	-0.397183	-0.24924	-0.261102	0.71783	-0.0127991	-0.362991
-4.33546	-0.624596	0.405137	-0.499839	-0.664373	0.28734	-0.217073	0.286817	-0.663411	-0.133988	0.9333	-0.475247	-0.0285904	-0.0596546	-0.250075	-0.271553	-0.0263436	0.505266	0.280272	0.645218	-0.624749	-0.249706	-0.279883	0.14553	0.116407	0.406296	0.638964	-0.507586	0.130673	0.422619	-0.00195818	0.404004	0.52265	0.0361139	0.0548321	0.0738357	-0.411972	-0.457232	-0.15212	-0.148756	0.101476	-0.105703	-0.312954	-0.0403047	-0.395886	-0.2506	-0.261113	0.719992	-0.0133674	-0.362329
-4.33448	-0.625839	0.402866	-0.500855	-0.663533	0.287785	-0.217495	0.287081	-0.663336	-0.13416	0.932518	-0.475567	-0.0299183	-0.0597289	-0.249016	-0.274093	-0.0276512	0.506254	0.280517	0.645342	-0.624204	-0.24732	-0.281581	0.145075	0.118349	0.406053	0.639928	-0.508583	0.130079	0.420572	-0.00147972	0.405784	0.519851	0.033535	0.0519935	0.0725839	-0.413659	-0.456186	-0.151013	-0.148499	0.102161	-0.10486	-0.313162	-0.040991	-0.39459	-0.251963	-0.261125	0.722139	-0.0139315	-0.361664
-4.3335	-0.627093	0.400597	-0.501863	-0.662693	0.288224	-0.217912	0.287324	-0.663246	-0.13434	0.931702	-0.475896	-0.0312401	-0.0597975	-0.24796	-0.276629	-0.0289562	0.507223	0.28075	0.645465	-0.623656	-0.244931	-0.283287	0.144613	0.12031	0.405805	0.640897	-0.509583	0.129497	0.418521	-0.0010036	0.407562	0.517046	0.0309623	0.0491517	0.0713249	-0.415345	-0.455133	-0.149923	-0.14822	0.102838	-0.10402	-0.313377	-0.0416786	-0.393296	-0.253329	-0.261137	0.724271	-0.0144914	-0.360996
-4.33252	-0.628356	0.398331	-0.502864	-0.661851	0.288656	-0.218323	0.287546	-0.663143	-0.134528	0.930853	-0.476235	-0.0325558	-0.0598605	-0.246906	-0.27916	-0.0302586	0.508174	0.280972	0.645588	-0.623107	-0.242539	-0.285001	0.144144	0.122291	0.405551	0.64187	-0.510587	0.128928	0.416468	-0.00052985	0.409337	0.514234	0.0283959	0.046307	0.0700588	-0.417029	-0.454071	-0.14885	-0.147919	0.103508	-0.103183	-0.313597	-0.0423675	-0.392003	-0.254697	-0.26115	0.726387	-0.0150469	-0.360326
-4.33153	-0.62963	0.396068	-0.503857	-0.661008	0.289081	-0.218728	0.287746	-0.663026	-0.134724	0.929972	-0.476584	-0.033865	-0.0599179	-0.245854	-0.281687	-0.0315582	0.509106	0.281182	0.645709	-0.622555	-0.240144	-0.286723	0.143668	0.124291	0.405292	0.642847	-0.511595	0.128371	0.414413	-5.84886e-05	0.41111	0.511416	0.025836	0.0434593	0.0687856	-0.418714	-0.453002	-0.147796	-0.147596	0.10417	-0.102349	-0.313824	-0.043058	-0.390711	-0.256068	-0.261162	0.728487	-0.015598	-0.359655
-4.33055	-0.630913	0.393808	-0.504843	-0.660165	0.289498	-0.219128	0.287926	-0.662895	-0.134929	0.929057	-0.476943	-0.0351677	-0.0599696	-0.244805	-0.284209	-0.032855	0.510019	0.281381	0.645829	-0.622002	-0.237747	-0.288452	0.143185	0.12631	0.405027	0.643828	-0.512607	0.127826	0.412356	0.000410452	0.41288	0.508592	0.0232829	0.0406089	0.0675054	-0.420397	-0.451925	-0.146759	-0.147252	0.104824	-0.101518	-0.314057	-0.0437501	-0.389421	-0.257442	-0.261175	0.730571	-0.0161446	-0.35898
-4.32957	-0.632206	0.391551	-0.505821	-0.659321	0.289908	-0.219522	0.288084	-0.66275	-0.135141	0.928111	-0.477311	-0.0364636	-0.0600157	-0.243759	-0.286725	-0.0341487	0.510913	0.281569	0.645948	-0.621447	-0.235349	-0.290189	0.142694	0.128348	0.404756	0.644814	-0.513622	0.127293	0.410297	0.000876945	0.414646	0.505762	0.0207367	0.0377557	0.0662183	-0.422078	-0.45084	-0.14574	-0.146885	0.105471	-0.10069	-0.314296	-0.0444438	-0.388131	-0.258818	-0.261187	0.732639	-0.0166867	-0.358304
-4.32858	-0.633509	0.389298	-0.506792	-0.658476	0.290309	-0.219911	0.288222	-0.662591	-0.135362	0.927132	-0.477689	-0.0377527	-0.0600562	-0.242716	-0.289236	-0.0354394	0.511789	0.281745	0.646065	-0.620891	-0.232948	-0.291933	0.142196	0.130404	0.404479	0.645804	-0.51464	0.126772	0.408237	0.00134096	0.41641	0.502927	0.0181976	0.0348999	0.0649244	-0.423759	-0.449748	-0.14474	-0.146496	0.10611	-0.0998652	-0.314541	-0.0451393	-0.386844	-0.260196	-0.2612	0.734691	-0.0172241	-0.357626
-4.3276	-0.634821	0.387048	-0.507755	-0.657631	0.290703	-0.220293	0.288338	-0.662417	-0.135591	0.926121	-0.478076	-0.0390347	-0.0600909	-0.241676	-0.29174	-0.0367268	0.512645	0.28191	0.646181	-0.620333	-0.230546	-0.293685	0.141692	0.132479	0.404198	0.646799	-0.515662	0.126263	0.406175	0.00180248	0.41817	0.500086	0.0156659	0.0320416	0.0636239	-0.425438	-0.448648	-0.143757	-0.146086	0.106741	-0.099044	-0.314793	-0.0458366	-0.385557	-0.261576	-0.261213	0.736727	-0.017757	-0.356946
-4.32662	-0.636143	0.384803	-0.508711	-0.656786	0.291089	-0.220671	0.288434	-0.66223	-0.135828	0.925078	-0.478474	-0.0403095	-0.0601201	-0.240639	-0.294238	-0.0380109	0.513482	0.282064	0.646295	-0.619773	-0.228143	-0.295443	0.14118	0.134572	0.40391	0.647797	-0.516687	0.125766	0.404113	0.00226146	0.419927	0.497241	0.0131416	0.029181	0.0623167	-0.427115	-0.447542	-0.142794	-0.145653	0.107363	-0.0982264	-0.31505	-0.0465359	-0.384272	-0.262958	-0.261226	0.738745	-0.018285	-0.356264
-4.32563	-0.637475	0.382562	-0.50966	-0.65594	0.291467	-0.221043	0.288509	-0.662028	-0.136074	0.924003	-0.478881	-0.0415769	-0.0601436	-0.239605	-0.29673	-0.0392917	0.5143	0.282206	0.646407	-0.619212	-0.225739	-0.297208	0.140661	0.136683	0.403617	0.6488	-0.517715	0.125282	0.402049	0.00271789	0.42168	0.494391	0.0106252	0.0263179	0.061003	-0.428791	-0.446428	-0.141849	-0.145199	0.107978	-0.0974125	-0.315313	-0.0472372	-0.382988	-0.264342	-0.261239	0.740747	-0.0188083	-0.35558
-4.32465	-0.638816	0.380325	-0.510601	-0.655094	0.291836	-0.221409	0.288563	-0.661812	-0.136327	0.922897	-0.479298	-0.0428367	-0.0601615	-0.238575	-0.299214	-0.0405689	0.515099	0.282338	0.646517	-0.618649	-0.223333	-0.298979	0.140135	0.138813	0.403319	0.649807	-0.518746	0.124809	0.399985	0.00317173	0.423429	0.491537	0.00811659	0.0234527	0.0596829	-0.430464	-0.445308	-0.140923	-0.144723	0.108583	-0.0966025	-0.315582	-0.0479406	-0.381705	-0.265728	-0.261252	0.742732	-0.0193267	-0.354894
-4.32367	-0.640166	0.378093	-0.511535	-0.654248	0.292196	-0.22177	0.288597	-0.661581	-0.136589	0.921759	-0.479725	-0.0440889	-0.0601738	-0.237549	-0.301691	-0.0418424	0.515879	0.282458	0.646625	-0.618085	-0.220928	-0.300757	0.139602	0.14096	0.403015	0.650819	-0.51978	0.124347	0.397921	0.00362295	0.425174	0.488679	0.00561615	0.0205854	0.0583564	-0.432136	-0.444181	-0.140017	-0.144225	0.109181	-0.0957963	-0.315858	-0.0486462	-0.380424	-0.267115	-0.261265	0.7447	-0.0198402	-0.354207
-4.32269	-0.641526	0.375866	-0.512462	-0.653401	0.292548	-0.222126	0.288611	-0.661337	-0.136859	0.92059	-0.480161	-0.0453331	-0.0601805	-0.236527	-0.304161	-0.0431123	0.516639	0.282566	0.646731	-0.61752	-0.218522	-0.30254	0.139062	0.143124	0.402705	0.651834	-0.520817	0.123898	0.395857	0.00407154	0.426915	0.485817	0.00312402	0.0177161	0.0570237	-0.433806	-0.443047	-0.139129	-0.143705	0.109769	-0.0949942	-0.316139	-0.049354	-0.379144	-0.268504	-0.261278	0.74665	-0.0203486	-0.353517
-4.3217	-0.642895	0.373644	-0.513382	-0.652555	0.292891	-0.222476	0.288604	-0.661078	-0.137137	0.919391	-0.480608	-0.0465693	-0.0601815	-0.235509	-0.306622	-0.0443782	0.51738	0.282664	0.646834	-0.616954	-0.216115	-0.30433	0.138516	0.145307	0.402391	0.652854	-0.521857	0.12346	0.393792	0.00451746	0.428652	0.482952	0.00064041	0.0148448	0.0556848	-0.435473	-0.441907	-0.138261	-0.143164	0.110349	-0.0941964	-0.316426	-0.0500643	-0.377866	-0.269894	-0.26129	0.748583	-0.020852	-0.352827
-4.32072	-0.644273	0.371427	-0.514295	-0.651709	0.293225	-0.222821	0.288576	-0.660804	-0.137423	0.91816	-0.481064	-0.0477973	-0.0601769	-0.234495	-0.309075	-0.0456403	0.518101	0.28275	0.646935	-0.616386	-0.213709	-0.306126	0.137962	0.147506	0.40207	0.653878	-0.5229	0.123034	0.391729	0.00496069	0.430384	0.480084	-0.0018345	0.0119718	0.0543399	-0.437138	-0.440761	-0.137413	-0.142601	0.11092	-0.0934028	-0.316719	-0.050777	-0.376588	-0.271285	-0.261303	0.750498	-0.0213502	-0.352135
-4.31974	-0.64566	0.369216	-0.515201	-0.650863	0.293549	-0.223161	0.288529	-0.660516	-0.137718	0.916899	-0.48153	-0.0490169	-0.0601668	-0.233485	-0.311519	-0.0468983	0.518803	0.282826	0.647032	-0.615818	-0.211303	-0.307927	0.137401	0.149722	0.401745	0.654906	-0.523945	0.12262	0.389666	0.00540119	0.432111	0.477213	-0.0043005	0.00909702	0.052989	-0.4388	-0.439609	-0.136584	-0.142016	0.111481	-0.0926136	-0.317017	-0.0514923	-0.375312	-0.272678	-0.261316	0.752396	-0.0218433	-0.351441
-4.31875	-0.647057	0.367011	-0.5161	-0.650017	0.293864	-0.223495	0.288461	-0.660214	-0.13802	0.915608	-0.482007	-0.050228	-0.0601511	-0.23248	-0.313954	-0.0481521	0.519486	0.28289	0.647127	-0.615248	-0.208898	-0.309734	0.136834	0.151955	0.401414	0.655938	-0.524993	0.122217	0.387603	0.00583895	0.433834	0.474339	-0.00675741	0.00622064	0.0516322	-0.440459	-0.438451	-0.135776	-0.141409	0.112034	-0.091829	-0.317321	-0.0522102	-0.374038	-0.274071	-0.261328	0.754275	-0.022331	-0.350746
-4.31777	-0.648462	0.364811	-0.516992	-0.649172	0.294169	-0.223824	0.288373	-0.659897	-0.138331	0.914286	-0.482493	-0.0514304	-0.0601298	-0.23148	-0.31638	-0.0494017	0.520148	0.282944	0.647219	-0.614678	-0.206494	-0.311545	0.13626	0.154205	0.401078	0.656974	-0.526044	0.121825	0.385542	0.00627393	0.435551	0.471463	-0.00920503	0.00334275	0.0502697	-0.442116	-0.437288	-0.134987	-0.140782	0.112577	-0.091049	-0.317631	-0.0529308	-0.372764	-0.275465	-0.26134	0.756137	-0.0228134	-0.35005
-4.31679	-0.649877	0.362618	-0.517877	-0.648326	0.294465	-0.224148	0.288266	-0.659566	-0.13865	0.912935	-0.482988	-0.052624	-0.0601029	-0.230484	-0.318797	-0.0506469	0.520792	0.282986	0.647308	-0.614106	-0.20409	-0.313362	0.135679	0.156471	0.400737	0.658015	-0.527097	0.121445	0.383482	0.0067061	0.437263	0.468585	-0.0116432	0.000463455	0.0489015	-0.44377	-0.436118	-0.134218	-0.140132	0.113111	-0.0902738	-0.317947	-0.0536542	-0.371492	-0.276861	-0.261352	0.75798	-0.0232904	-0.349352
-4.3158	-0.6513	0.360431	-0.518756	-0.647482	0.294751	-0.224467	0.288138	-0.65922	-0.138977	0.911553	-0.483494	-0.0538085	-0.0600705	-0.229494	-0.321203	-0.0518877	0.521415	0.283018	0.647393	-0.613534	-0.201688	-0.315184	0.135091	0.158753	0.40039	0.659059	-0.528153	0.121077	0.381424	0.00713545	0.43897	0.465705	-0.0140716	-0.00241716	0.0475276	-0.44542	-0.434944	-0.13347	-0.139461	0.113635	-0.0895034	-0.318269	-0.0543806	-0.370222	-0.278256	-0.261364	0.759805	-0.0237619	-0.348653
-4.31482	-0.652732	0.358251	-0.519627	-0.646638	0.295027	-0.224781	0.287991	-0.65886	-0.139312	0.910143	-0.48401	-0.0549838	-0.0600326	-0.228509	-0.323599	-0.0531239	0.522019	0.283038	0.647475	-0.612961	-0.199287	-0.317011	0.134497	0.161051	0.400039	0.660107	-0.529211	0.120719	0.379367	0.00756194	0.440672	0.462824	-0.0164902	-0.00529898	0.0461483	-0.447067	-0.433764	-0.132742	-0.138769	0.114149	-0.088738	-0.318595	-0.0551099	-0.368952	-0.279652	-0.261376	0.761612	-0.0242279	-0.347953
-4.31384	-0.654172	0.356078	-0.520492	-0.645795	0.295292	-0.22509	0.287825	-0.658485	-0.139655	0.908703	-0.484536	-0.0561499	-0.0599892	-0.227529	-0.325984	-0.0543554	0.522603	0.283048	0.647553	-0.612388	-0.196889	-0.318842	0.133896	0.163365	0.399682	0.661159	-0.530271	0.120373	0.377313	0.00798555	0.442367	0.459942	-0.0188988	-0.00818192	0.0447636	-0.448711	-0.432579	-0.132035	-0.138055	0.114654	-0.0879777	-0.318928	-0.0558424	-0.367684	-0.281049	-0.261387	0.7634	-0.0246882	-0.347252
-4.31286	-0.655622	0.353912	-0.52135	-0.644952	0.295547	-0.225394	0.287638	-0.658095	-0.140006	0.907234	-0.485071	-0.0573064	-0.0599402	-0.226555	-0.328358	-0.0555822	0.523167	0.283047	0.647628	-0.611813	-0.194492	-0.320677	0.133288	0.165694	0.39932	0.662215	-0.531333	0.120038	0.37526	0.00840626	0.444057	0.457059	-0.0212971	-0.0110659	0.0433736	-0.450352	-0.431389	-0.131349	-0.137321	0.115148	-0.0872227	-0.319266	-0.056578	-0.366417	-0.282445	-0.261398	0.765169	-0.0251428	-0.34655
-4.31187	-0.65708	0.351753	-0.522202	-0.64411	0.295792	-0.225692	0.287433	-0.657691	-0.140365	0.905736	-0.485617	-0.0584533	-0.0598858	-0.225586	-0.330721	-0.0568041	0.523711	0.283036	0.647699	-0.611239	-0.192097	-0.322516	0.132673	0.168039	0.398953	0.663275	-0.532398	0.119714	0.37321	0.00882402	0.44574	0.454176	-0.023685	-0.0139507	0.0419784	-0.451988	-0.430194	-0.130684	-0.136564	0.115633	-0.0864729	-0.319609	-0.0573168	-0.365151	-0.283842	-0.261408	0.766919	-0.0255917	-0.345847
-4.31089	-0.658546	0.349602	-0.523048	-0.643269	0.296026	-0.225986	0.287208	-0.657272	-0.140732	0.904209	-0.486172	-0.0595903	-0.0598259	-0.224624	-0.333072	-0.0580211	0.524235	0.283013	0.647765	-0.610663	-0.189705	-0.32436	0.132053	0.170399	0.398581	0.664339	-0.533465	0.119401	0.371163	0.00923883	0.447418	0.451292	-0.0260622	-0.0168364	0.0405781	-0.453621	-0.428995	-0.130039	-0.135787	0.116107	-0.0857285	-0.319958	-0.058059	-0.363887	-0.285239	-0.261419	0.76865	-0.0260347	-0.345144
-4.30991	-0.660021	0.347458	-0.523886	-0.642429	0.296249	-0.226275	0.286963	-0.656839	-0.141107	0.902654	-0.486738	-0.0607175	-0.0597606	-0.223667	-0.335411	-0.059233	0.52474	0.28298	0.647828	-0.610088	-0.187315	-0.326207	0.131425	0.172774	0.398203	0.665406	-0.534533	0.1191	0.369119	0.00965064	0.449088	0.448408	-0.0284287	-0.0197228	0.0391728	-0.45525	-0.427792	-0.129416	-0.134989	0.116571	-0.0849897	-0.320313	-0.0588047	-0.362624	-0.286636	-0.261429	0.770362	-0.0264718	-0.344439
-4.30892	-0.661504	0.345322	-0.524719	-0.64159	0.296461	-0.226559	0.2867	-0.656391	-0.14149	0.901071	-0.487313	-0.0618345	-0.0596899	-0.222717	-0.337738	-0.0604398	0.525224	0.282937	0.647886	-0.609512	-0.184928	-0.328058	0.130791	0.175164	0.397821	0.666477	-0.535604	0.118808	0.367077	0.0100594	0.450753	0.445525	-0.0307842	-0.0226098	0.0377625	-0.456875	-0.426584	-0.128814	-0.13417	0.117025	-0.0842564	-0.320672	-0.0595538	-0.361362	-0.288032	-0.261438	0.772055	-0.0269029	-0.343733
-4.30794	-0.662995	0.343194	-0.525545	-0.640752	0.296662	-0.226838	0.286418	-0.655928	-0.141881	0.89946	-0.487898	-0.0629412	-0.0596137	-0.221772	-0.340053	-0.0616413	0.525688	0.282883	0.64794	-0.608936	-0.182545	-0.329912	0.130151	0.177568	0.397434	0.667552	-0.536676	0.118528	0.365039	0.0104652	0.45241	0.442642	-0.0331285	-0.0254974	0.0363474	-0.458496	-0.425372	-0.128233	-0.133329	0.117468	-0.0835289	-0.321037	-0.0603066	-0.360101	-0.289428	-0.261447	0.773728	-0.027328	-0.343027
-4.30696	-0.664495	0.341075	-0.526365	-0.639916	0.296852	-0.227113	0.286117	-0.655451	-0.142279	0.897822	-0.488494	-0.0640375	-0.0595322	-0.220835	-0.342354	-0.0628375	0.526132	0.282818	0.647989	-0.608359	-0.180165	-0.33177	0.129504	0.179986	0.397042	0.66863	-0.53775	0.118259	0.363005	0.0108679	0.454061	0.43976	-0.0354614	-0.0283853	0.0349277	-0.460113	-0.424156	-0.127674	-0.132468	0.1179	-0.0828072	-0.321407	-0.061063	-0.358842	-0.290823	-0.261456	0.775381	-0.027747	-0.342321
-4.30597	-0.666002	0.338964	-0.527179	-0.63908	0.29703	-0.227382	0.285797	-0.654959	-0.142686	0.896155	-0.489099	-0.0651232	-0.0594453	-0.219904	-0.344642	-0.0640282	0.526556	0.282743	0.648034	-0.607782	-0.177788	-0.333631	0.12885	0.182418	0.396645	0.669712	-0.538826	0.118	0.360975	0.0112675	0.455704	0.436879	-0.0377828	-0.0312736	0.0335033	-0.461725	-0.422936	-0.127137	-0.131586	0.118322	-0.0820914	-0.321783	-0.0618232	-0.357583	-0.292217	-0.261464	0.777015	-0.0281598	-0.341613
-4.30499	-0.667518	0.336861	-0.527986	-0.638246	0.297197	-0.227647	0.285459	-0.654452	-0.1431	0.894462	-0.489715	-0.0661982	-0.0593531	-0.21898	-0.346916	-0.0652134	0.52696	0.282658	0.648074	-0.607206	-0.175416	-0.335494	0.128191	0.184864	0.396243	0.670797	-0.539904	0.117751	0.358948	0.011664	0.45734	0.434	-0.0400924	-0.0341621	0.0320743	-0.463332	-0.421713	-0.126621	-0.130683	0.118733	-0.0813816	-0.322163	-0.0625873	-0.356326	-0.293611	-0.261471	0.778629	-0.0285663	-0.340905
-4.30401	-0.669041	0.334768	-0.528788	-0.637413	0.297353	-0.227907	0.285102	-0.653931	-0.143522	0.892742	-0.49034	-0.0672624	-0.0592555	-0.218063	-0.349177	-0.0663931	0.527343	0.282563	0.648109	-0.606629	-0.173047	-0.337361	0.127525	0.187324	0.395836	0.671886	-0.540983	0.117514	0.356925	0.0120574	0.458969	0.431123	-0.0423902	-0.0370507	0.030641	-0.464935	-0.420486	-0.126128	-0.12976	0.119132	-0.080678	-0.322549	-0.0633554	-0.35507	-0.295004	-0.261478	0.780223	-0.0289665	-0.340197
-4.30302	-0.670573	0.332683	-0.529583	-0.636582	0.297496	-0.228163	0.284727	-0.653395	-0.143952	0.890995	-0.490975	-0.0683155	-0.0591527	-0.217153	-0.351423	-0.067567	0.527707	0.282457	0.648139	-0.606052	-0.170683	-0.339229	0.126853	0.189797	0.395424	0.672978	-0.542063	0.117286	0.354907	0.0124476	0.46059	0.428247	-0.0446759	-0.0399394	0.0292033	-0.466533	-0.419256	-0.125656	-0.128816	0.119521	-0.0799805	-0.322939	-0.0641274	-0.353815	-0.296395	-0.261485	0.781797	-0.0293603	-0.339488
-4.30204	-0.672112	0.330608	-0.530373	-0.635752	0.297628	-0.228414	0.284333	-0.652844	-0.14439	0.889222	-0.491621	-0.0693574	-0.0590446	-0.21625	-0.353654	-0.0687351	0.52805	0.282341	0.648163	-0.605475	-0.168323	-0.341101	0.126174	0.192283	0.395008	0.674074	-0.543145	0.117069	0.352894	0.0128346	0.462203	0.425374	-0.0469493	-0.042828	0.0277614	-0.468126	-0.418023	-0.125206	-0.127852	0.119898	-0.0792893	-0.323335	-0.0649036	-0.352561	-0.297786	-0.261491	0.783351	-0.0297476	-0.338779
-4.30106	-0.673658	0.328543	-0.531157	-0.634924	0.297747	-0.228661	0.283921	-0.652279	-0.144835	0.887422	-0.492276	-0.0703881	-0.0589313	-0.215355	-0.355871	-0.0698973	0.528373	0.282215	0.648182	-0.604898	-0.165968	-0.342974	0.125489	0.194782	0.394587	0.675172	-0.544229	0.116862	0.350885	0.0132183	0.463808	0.422504	-0.0492102	-0.0457164	0.0263154	-0.469714	-0.416786	-0.124779	-0.126867	0.120264	-0.0786045	-0.323735	-0.065684	-0.351308	-0.299175	-0.261496	0.784885	-0.0301284	-0.33807
-4.30008	-0.675213	0.326486	-0.531935	-0.634098	0.297855	-0.228903	0.283492	-0.6517	-0.145287	0.885596	-0.492941	-0.0714072	-0.0588128	-0.214467	-0.358072	-0.0710535	0.528675	0.282079	0.648196	-0.604322	-0.163618	-0.34485	0.124799	0.197293	0.394161	0.676274	-0.545313	0.116665	0.348882	0.0135989	0.465405	0.419636	-0.0514585	-0.0486045	0.0248653	-0.471297	-0.415547	-0.124373	-0.125862	0.120619	-0.0779262	-0.324141	-0.0664687	-0.350056	-0.300562	-0.261501	0.786398	-0.0305025	-0.33736
-4.29909	-0.676774	0.32444	-0.532707	-0.633273	0.29795	-0.22914	0.283044	-0.651105	-0.145748	0.883745	-0.493617	-0.0724147	-0.0586891	-0.213587	-0.360258	-0.0722037	0.528957	0.281932	0.648204	-0.603746	-0.161273	-0.346728	0.124102	0.199817	0.393731	0.677379	-0.546399	0.116479	0.346883	0.0139762	0.466994	0.416772	-0.0536941	-0.0514923	0.0234113	-0.472874	-0.414306	-0.123991	-0.124837	0.120962	-0.0772544	-0.324551	-0.0672578	-0.348805	-0.301948	-0.261505	0.78789	-0.03087	-0.33665
-4.29811	-0.678343	0.322404	-0.533473	-0.63245	0.298032	-0.229374	0.282579	-0.650496	-0.146215	0.881868	-0.494302	-0.0734105	-0.0585602	-0.212715	-0.362428	-0.0733477	0.529218	0.281776	0.648207	-0.60317	-0.158933	-0.348607	0.123399	0.202353	0.393295	0.678487	-0.547486	0.116302	0.344891	0.0143502	0.468574	0.413911	-0.0559166	-0.0543796	0.0219535	-0.474446	-0.413061	-0.12363	-0.123791	0.121294	-0.0765893	-0.324966	-0.0680513	-0.347555	-0.303332	-0.261508	0.789362	-0.0312307	-0.33594
-4.29713	-0.67992	0.320378	-0.534234	-0.631629	0.298102	-0.229602	0.282096	-0.649873	-0.14669	0.879966	-0.494997	-0.0743944	-0.0584262	-0.211851	-0.364582	-0.0744856	0.529459	0.28161	0.648204	-0.602594	-0.156599	-0.350488	0.12269	0.204901	0.392856	0.679598	-0.548574	0.116135	0.342903	0.0147208	0.470145	0.411054	-0.0581261	-0.0572663	0.0204919	-0.476013	-0.411815	-0.123293	-0.122726	0.121613	-0.0759309	-0.325386	-0.0688494	-0.346306	-0.304715	-0.26151	0.790813	-0.0315846	-0.33523
-4.29614	-0.681503	0.318363	-0.53499	-0.63081	0.29816	-0.229827	0.281595	-0.649235	-0.147173	0.878039	-0.495703	-0.0753662	-0.0582871	-0.210996	-0.366719	-0.075617	0.52968	0.281435	0.648195	-0.602019	-0.154271	-0.35237	0.121975	0.207461	0.392411	0.680711	-0.549664	0.115978	0.340922	0.0150882	0.471708	0.408201	-0.0603222	-0.0601524	0.0190267	-0.477574	-0.410566	-0.122977	-0.121641	0.121921	-0.0752793	-0.325811	-0.069652	-0.345058	-0.306095	-0.261512	0.792244	-0.0319316	-0.33452
-4.29516	-0.683094	0.316358	-0.53574	-0.629993	0.298204	-0.230047	0.281078	-0.648582	-0.147663	0.876088	-0.496418	-0.0763259	-0.058143	-0.210148	-0.36884	-0.0767421	0.52988	0.281249	0.648179	-0.601445	-0.15195	-0.354253	0.121254	0.210032	0.391962	0.681828	-0.550754	0.115831	0.338946	0.0154522	0.473262	0.405352	-0.0625048	-0.0630377	0.017558	-0.479129	-0.409316	-0.122685	-0.120536	0.122217	-0.0746346	-0.32624	-0.0704594	-0.343811	-0.307473	-0.261513	0.793653	-0.0322716	-0.33381
-4.29418	-0.684692	0.314364	-0.536484	-0.629178	0.298236	-0.230263	0.280543	-0.647915	-0.14816	0.874112	-0.497144	-0.0772732	-0.0579938	-0.20931	-0.370943	-0.0778607	0.53006	0.281054	0.648158	-0.60087	-0.149634	-0.356138	0.120527	0.212614	0.391509	0.682947	-0.551845	0.115693	0.336977	0.0158128	0.474806	0.402508	-0.0646737	-0.0659222	0.0160859	-0.480677	-0.408063	-0.122415	-0.119411	0.122501	-0.0739969	-0.326673	-0.0712716	-0.342565	-0.308849	-0.261513	0.795041	-0.0326046	-0.3331
-4.29319	-0.686296	0.31238	-0.537223	-0.628366	0.298255	-0.230475	0.279991	-0.647234	-0.148665	0.872112	-0.497879	-0.0782081	-0.0578397	-0.20848	-0.373029	-0.0789728	0.530219	0.28085	0.64813	-0.600297	-0.147325	-0.358023	0.119795	0.215207	0.391051	0.684069	-0.552936	0.115565	0.335015	0.01617	0.476341	0.399668	-0.0668288	-0.0688057	0.0146104	-0.48222	-0.406809	-0.122169	-0.118266	0.122773	-0.0733663	-0.327112	-0.0720887	-0.34132	-0.310222	-0.261512	0.796408	-0.0329305	-0.332391
-4.29221	-0.687908	0.310408	-0.537957	-0.627555	0.29826	-0.230683	0.279422	-0.646538	-0.149177	0.870088	-0.498624	-0.0791303	-0.0576806	-0.207659	-0.375097	-0.0800781	0.530357	0.280636	0.648096	-0.599724	-0.145023	-0.35991	0.119056	0.217811	0.390588	0.685193	-0.554029	0.115446	0.333058	0.0165238	0.477867	0.396834	-0.0689699	-0.0716882	0.0131316	-0.483757	-0.405553	-0.121945	-0.117103	0.123032	-0.0727428	-0.327554	-0.0729106	-0.340075	-0.311593	-0.261511	0.797754	-0.0332492	-0.331681
-4.29123	-0.689526	0.308447	-0.538686	-0.626747	0.298253	-0.230886	0.278836	-0.645827	-0.149695	0.86804	-0.49938	-0.0800398	-0.0575165	-0.206847	-0.377147	-0.0811768	0.530475	0.280412	0.648055	-0.599152	-0.142728	-0.361796	0.118312	0.220425	0.390121	0.68632	-0.555122	0.115336	0.331109	0.0168741	0.479383	0.394005	-0.0710969	-0.0745695	0.0116498	-0.485288	-0.404296	-0.121745	-0.115919	0.123279	-0.0721264	-0.328001	-0.0737377	-0.338831	-0.312961	-0.261508	0.799079	-0.0335606	-0.330972
-4.29025	-0.691151	0.306498	-0.53941	-0.62594	0.298232	-0.231086	0.278233	-0.645103	-0.150221	0.865969	-0.500145	-0.0809365	-0.0573476	-0.206044	-0.379179	-0.0822687	0.530572	0.280179	0.648008	-0.59858	-0.14044	-0.363684	0.117562	0.22305	0.38965	0.687449	-0.556216	0.115236	0.329167	0.017221	0.480888	0.391182	-0.0732095	-0.0774495	0.0101649	-0.486812	-0.403038	-0.121567	-0.114717	0.123514	-0.0715174	-0.328453	-0.0745698	-0.337588	-0.314326	-0.261505	0.800382	-0.0338648	-0.330263
-4.28926	-0.692782	0.30456	-0.540128	-0.625137	0.298197	-0.231282	0.277614	-0.644363	-0.150754	0.863875	-0.50092	-0.0818201	-0.0571738	-0.20525	-0.381192	-0.0833537	0.530648	0.279937	0.647954	-0.59801	-0.138159	-0.365571	0.116807	0.225684	0.389174	0.688581	-0.557311	0.115145	0.327232	0.0175644	0.482384	0.388365	-0.0753076	-0.0803282	0.00867705	-0.488329	-0.401778	-0.121413	-0.113495	0.123736	-0.0709157	-0.328909	-0.0754071	-0.336346	-0.315689	-0.261501	0.801663	-0.0341615	-0.329555
-4.28828	-0.69442	0.302634	-0.540842	-0.624336	0.298149	-0.231473	0.276979	-0.64361	-0.151294	0.861758	-0.501705	-0.0826906	-0.0569952	-0.204466	-0.383186	-0.0844317	0.530704	0.279686	0.647893	-0.59744	-0.135886	-0.367459	0.116045	0.228328	0.388694	0.689714	-0.558405	0.115063	0.325304	0.0179042	0.48387	0.385554	-0.0773911	-0.0832055	0.00718638	-0.48984	-0.400518	-0.121282	-0.112255	0.123945	-0.0703214	-0.329369	-0.0762497	-0.335105	-0.317048	-0.261495	0.802923	-0.0344508	-0.328846
-4.2873	-0.696064	0.30072	-0.541551	-0.623537	0.298087	-0.231661	0.276327	-0.642842	-0.151841	0.859618	-0.5025	-0.0835478	-0.0568118	-0.203691	-0.38516	-0.0855027	0.530739	0.279426	0.647825	-0.596871	-0.133621	-0.369346	0.115279	0.230981	0.38821	0.69085	-0.559501	0.11499	0.323384	0.0182406	0.485345	0.38275	-0.0794597	-0.0860812	0.00569298	-0.491344	-0.399257	-0.121174	-0.110995	0.124142	-0.0697347	-0.329833	-0.0770976	-0.333864	-0.318404	-0.261489	0.804161	-0.0347325	-0.328139
-4.28631	-0.697714	0.298818	-0.542254	-0.62274	0.298012	-0.231845	0.27566	-0.64206	-0.152395	0.857456	-0.503306	-0.0843917	-0.0566237	-0.202926	-0.387115	-0.0865666	0.530754	0.279156	0.64775	-0.596303	-0.131364	-0.371233	0.114507	0.233643	0.387721	0.691988	-0.560597	0.114925	0.321471	0.0185734	0.48681	0.379953	-0.0815133	-0.0889553	0.00419695	-0.492841	-0.397996	-0.12109	-0.109717	0.124326	-0.0691554	-0.330301	-0.077951	-0.332623	-0.319757	-0.261481	0.805378	-0.0350067	-0.327432
-4.28533	-0.69937	0.296929	-0.542953	-0.621947	0.297923	-0.232025	0.274976	-0.641264	-0.152955	0.855272	-0.504121	-0.0852219	-0.0564309	-0.202171	-0.38905	-0.0876233	0.530747	0.278878	0.647667	-0.595736	-0.129115	-0.37312	0.113729	0.236315	0.387229	0.693127	-0.561693	0.11487	0.319566	0.0189026	0.488264	0.377162	-0.0835519	-0.0918277	0.00269838	-0.494331	-0.396734	-0.121029	-0.10842	0.124497	-0.0685838	-0.330773	-0.0788098	-0.331383	-0.321106	-0.261473	0.806572	-0.0352732	-0.326725
-4.28435	-0.701033	0.295051	-0.543648	-0.621156	0.29782	-0.232201	0.274277	-0.640454	-0.153522	0.853067	-0.504945	-0.0860385	-0.0562334	-0.201426	-0.390965	-0.0886727	0.53072	0.278591	0.647578	-0.59517	-0.126875	-0.375006	0.112946	0.238995	0.386732	0.694269	-0.562789	0.114823	0.31767	0.0192282	0.489707	0.374379	-0.0855751	-0.0946982	0.00119738	-0.495814	-0.395471	-0.120992	-0.107104	0.124655	-0.0680199	-0.331249	-0.0796743	-0.330144	-0.322452	-0.261463	0.807745	-0.0355319	-0.326019
-4.28336	-0.702701	0.293187	-0.544337	-0.620367	0.297702	-0.232374	0.273562	-0.639629	-0.154096	0.85084	-0.50578	-0.0868414	-0.0560313	-0.200691	-0.39286	-0.0897149	0.530673	0.278295	0.647481	-0.594605	-0.124644	-0.376892	0.112157	0.241683	0.38623	0.695412	-0.563885	0.114784	0.315782	0.0195502	0.491139	0.371604	-0.0875828	-0.0975668	-0.000305962	-0.49729	-0.394209	-0.120978	-0.10577	0.124799	-0.0674637	-0.331729	-0.0805443	-0.328905	-0.323793	-0.261453	0.808895	-0.0357829	-0.325314
-4.28238	-0.704375	0.291335	-0.545023	-0.619582	0.297571	-0.232543	0.272831	-0.63879	-0.154676	0.848592	-0.506625	-0.0876303	-0.0558246	-0.199967	-0.394733	-0.0907496	0.530604	0.27799	0.647376	-0.594042	-0.122421	-0.378777	0.111364	0.244379	0.385725	0.696557	-0.564982	0.114754	0.313902	0.0198686	0.49256	0.368836	-0.089575	-0.100433	-0.00181154	-0.498759	-0.392947	-0.120987	-0.104418	0.124931	-0.0669154	-0.332213	-0.0814201	-0.327667	-0.325131	-0.261441	0.810023	-0.0360259	-0.324609
-4.2814	-0.706055	0.289496	-0.545703	-0.618799	0.297426	-0.232708	0.272085	-0.637938	-0.155263	0.846323	-0.50748	-0.0884052	-0.0556133	-0.199253	-0.396585	-0.0917769	0.530515	0.277677	0.647264	-0.593479	-0.120208	-0.380661	0.110565	0.247083	0.385216	0.697703	-0.566079	0.114732	0.312031	0.0201833	0.493969	0.366077	-0.0915513	-0.103298	-0.00331925	-0.50022	-0.391685	-0.121021	-0.103048	0.12505	-0.0663748	-0.332701	-0.0823017	-0.326429	-0.326465	-0.261428	0.81113	-0.0362611	-0.323905
-4.28041	-0.707741	0.287671	-0.546379	-0.618019	0.297266	-0.23287	0.271324	-0.637071	-0.155856	0.844033	-0.508344	-0.0891659	-0.0553976	-0.19855	-0.398416	-0.0927967	0.530404	0.277355	0.647144	-0.592918	-0.118003	-0.382543	0.109761	0.249795	0.384702	0.698851	-0.567176	0.114719	0.310168	0.0204943	0.495367	0.363325	-0.0935118	-0.10616	-0.00482899	-0.501673	-0.390423	-0.121078	-0.10166	0.125155	-0.0658423	-0.333193	-0.0831892	-0.325192	-0.327795	-0.261414	0.812214	-0.0364882	-0.323202
-4.27943	-0.709432	0.285858	-0.547051	-0.617242	0.297092	-0.233028	0.270548	-0.636191	-0.156456	0.841723	-0.509218	-0.0899123	-0.0551774	-0.197857	-0.400226	-0.0938088	0.530273	0.277025	0.647017	-0.592358	-0.115809	-0.384425	0.108951	0.252514	0.384185	0.699999	-0.568272	0.114713	0.308315	0.0208017	0.496753	0.360583	-0.0954562	-0.10902	-0.00634068	-0.503119	-0.389162	-0.121158	-0.100253	0.125246	-0.0653176	-0.333688	-0.0840826	-0.323955	-0.329121	-0.261398	0.813275	-0.0367072	-0.3225
-4.27845	-0.711128	0.284059	-0.547719	-0.616468	0.296903	-0.233183	0.269757	-0.635296	-0.157061	0.839393	-0.510102	-0.0906443	-0.0549528	-0.197175	-0.402013	-0.0948133	0.530122	0.276686	0.646881	-0.591799	-0.113624	-0.386305	0.108137	0.25524	0.383663	0.701149	-0.569369	0.114716	0.30647	0.0211053	0.498127	0.35785	-0.0973844	-0.111877	-0.0078542	-0.504557	-0.387902	-0.121263	-0.0988295	0.125325	-0.0648011	-0.334186	-0.0849821	-0.322718	-0.330442	-0.261381	0.814314	-0.0369182	-0.321799
-4.27747	-0.71283	0.282273	-0.548382	-0.615697	0.2967	-0.233334	0.268951	-0.634388	-0.157673	0.837044	-0.510996	-0.0913618	-0.0547238	-0.196504	-0.403778	-0.0958101	0.529949	0.276339	0.646738	-0.591242	-0.111449	-0.388183	0.107317	0.257973	0.383138	0.7023	-0.570465	0.114726	0.304635	0.0214052	0.499489	0.355125	-0.0992962	-0.114732	-0.00936946	-0.505987	-0.386642	-0.121391	-0.097388	0.125389	-0.0642926	-0.334689	-0.0858876	-0.321481	-0.331759	-0.261363	0.815331	-0.0371209	-0.321098
-4.27648	-0.714537	0.280501	-0.549041	-0.614929	0.296482	-0.233482	0.26813	-0.633466	-0.158291	0.834674	-0.5119	-0.0920647	-0.0544905	-0.195845	-0.40552	-0.0967991	0.529755	0.275984	0.646586	-0.590686	-0.109284	-0.39006	0.106493	0.260712	0.382608	0.703452	-0.571561	0.114744	0.30281	0.0217014	0.500838	0.35241	-0.101191	-0.117585	-0.0108864	-0.507409	-0.385384	-0.121543	-0.0959291	0.12544	-0.0637922	-0.335194	-0.0867993	-0.320245	-0.333071	-0.261344	0.816325	-0.0373153	-0.320399
-4.2755	-0.716249	0.278743	-0.549696	-0.614164	0.29625	-0.233626	0.267296	-0.632531	-0.158916	0.832286	-0.512813	-0.0927528	-0.0542529	-0.195197	-0.40724	-0.0977803	0.529541	0.275621	0.646426	-0.590131	-0.10713	-0.391935	0.105664	0.263458	0.382075	0.704605	-0.572657	0.11477	0.300994	0.0219939	0.502176	0.349705	-0.10307	-0.120435	-0.0124048	-0.508823	-0.384126	-0.121718	-0.0944529	0.125477	-0.0633	-0.335703	-0.0877172	-0.319009	-0.334378	-0.261323	0.817297	-0.0375014	-0.319701
-4.27452	-0.717966	0.276999	-0.550347	-0.613402	0.296003	-0.233768	0.266446	-0.631582	-0.159546	0.829879	-0.513737	-0.093426	-0.0540111	-0.19456	-0.408937	-0.0987536	0.529306	0.27525	0.646258	-0.589578	-0.104986	-0.393808	0.104829	0.266209	0.381538	0.705758	-0.573753	0.114803	0.299187	0.0222825	0.503501	0.34701	-0.104932	-0.123281	-0.0139247	-0.510229	-0.38287	-0.121918	-0.0929595	0.125501	-0.062816	-0.336216	-0.0886414	-0.317773	-0.33568	-0.261301	0.818246	-0.0376791	-0.319004
-4.27353	-0.719688	0.275269	-0.550994	-0.612643	0.295741	-0.233906	0.265583	-0.630619	-0.160182	0.827453	-0.51467	-0.0940843	-0.0537652	-0.193934	-0.41061	-0.0997189	0.52905	0.274871	0.646082	-0.589027	-0.102853	-0.395678	0.10399	0.268967	0.380997	0.706912	-0.574848	0.114844	0.297391	0.0225674	0.504813	0.344325	-0.106777	-0.126125	-0.0154459	-0.511626	-0.381615	-0.122141	-0.0914491	0.12551	-0.0623403	-0.336731	-0.089572	-0.316537	-0.336978	-0.261278	0.819173	-0.0378483	-0.318308
-4.27255	-0.721414	0.273553	-0.551638	-0.611887	0.295464	-0.23404	0.264706	-0.629643	-0.160823	0.825008	-0.515612	-0.0947274	-0.053515	-0.193321	-0.412259	-0.100676	0.528773	0.274485	0.645897	-0.588477	-0.100731	-0.397547	0.103146	0.271729	0.380452	0.708067	-0.575943	0.114892	0.295604	0.0228484	0.506112	0.34165	-0.108605	-0.128966	-0.0169684	-0.513015	-0.380362	-0.122388	-0.0899219	0.125506	-0.0618729	-0.33725	-0.090509	-0.315301	-0.33827	-0.261253	0.820076	-0.038009	-0.317613
-4.27157	-0.723146	0.271852	-0.552277	-0.611135	0.295172	-0.234172	0.263815	-0.628653	-0.161471	0.822546	-0.516565	-0.0953554	-0.0532608	-0.192719	-0.413884	-0.101625	0.528476	0.27409	0.645704	-0.587928	-0.0986201	-0.399413	0.102298	0.274497	0.379903	0.709221	-0.577037	0.114947	0.293828	0.0231256	0.507398	0.338986	-0.110415	-0.131804	-0.018492	-0.514396	-0.379111	-0.122659	-0.088378	0.125488	-0.0614139	-0.337772	-0.0914526	-0.314065	-0.339557	-0.261226	0.820957	-0.0381611	-0.316919
-4.27058	-0.724881	0.270165	-0.552913	-0.610386	0.294866	-0.234301	0.262911	-0.62765	-0.162124	0.820066	-0.517526	-0.095968	-0.0530026	-0.192129	-0.415485	-0.102566	0.528157	0.273688	0.645502	-0.587382	-0.0965205	-0.401276	0.101445	0.27727	0.379351	0.710376	-0.578131	0.11501	0.292062	0.023399	0.508671	0.336334	-0.112208	-0.134639	-0.0200166	-0.515768	-0.377861	-0.122954	-0.0868175	0.125455	-0.0609632	-0.338297	-0.0924026	-0.312829	-0.340838	-0.261198	0.821815	-0.0383045	-0.316227
-4.2696	-0.726621	0.268492	-0.553545	-0.60964	0.294544	-0.234426	0.261992	-0.626634	-0.162783	0.817569	-0.518498	-0.0965652	-0.0527403	-0.191551	-0.417062	-0.103499	0.527818	0.273279	0.645291	-0.586836	-0.0944324	-0.403137	0.100587	0.280047	0.378794	0.711531	-0.579224	0.115079	0.290306	0.0236686	0.50993	0.333692	-0.113984	-0.137471	-0.0215422	-0.517131	-0.376614	-0.123273	-0.0852407	0.125408	-0.060521	-0.338825	-0.0933594	-0.311593	-0.342114	-0.261169	0.82265	-0.0384392	-0.315535
-4.26862	-0.728366	0.266835	-0.554173	-0.608898	0.294207	-0.234549	0.261061	-0.625604	-0.163447	0.815054	-0.519479	-0.0971469	-0.0524741	-0.190986	-0.418614	-0.104424	0.527457	0.272862	0.645072	-0.586293	-0.092356	-0.404995	0.0997246	0.282829	0.378235	0.712686	-0.580316	0.115155	0.288561	0.0239342	0.511176	0.331061	-0.115742	-0.140299	-0.0230687	-0.518485	-0.375369	-0.123615	-0.0836476	0.125348	-0.0600873	-0.339356	-0.0943228	-0.310356	-0.343384	-0.261138	0.823462	-0.0385651	-0.314846
-4.26764	-0.730114	0.265192	-0.554798	-0.608159	0.293855	-0.234668	0.260117	-0.624562	-0.164116	0.812522	-0.52047	-0.097713	-0.052204	-0.190433	-0.420141	-0.10534	0.527076	0.272438	0.644844	-0.585751	-0.0902916	-0.40685	0.0988578	0.285614	0.377671	0.71384	-0.581408	0.115238	0.286827	0.024196	0.512408	0.328443	-0.117483	-0.143123	-0.0245959	-0.519831	-0.374126	-0.123982	-0.0820385	0.125273	-0.059662	-0.339889	-0.095293	-0.30912	-0.344648	-0.261105	0.824251	-0.0386822	-0.314157
-4.26665	-0.731867	0.263564	-0.55542	-0.607423	0.293488	-0.234785	0.259159	-0.623506	-0.164791	0.809974	-0.52147	-0.0982633	-0.0519301	-0.189892	-0.421642	-0.106248	0.526674	0.272007	0.644607	-0.585212	-0.0882392	-0.408701	0.0979866	0.288404	0.377104	0.714994	-0.582499	0.115327	0.285104	0.0244539	0.513627	0.325836	-0.119205	-0.145944	-0.0261238	-0.521167	-0.372886	-0.124372	-0.0804135	0.125183	-0.0592453	-0.340426	-0.09627	-0.307883	-0.345907	-0.261071	0.825018	-0.0387904	-0.31347
-4.26567	-0.733624	0.261952	-0.556038	-0.606691	0.293106	-0.234899	0.258189	-0.622437	-0.165471	0.80741	-0.52248	-0.0987978	-0.0516524	-0.189364	-0.423118	-0.107148	0.526252	0.271568	0.644361	-0.584674	-0.0861991	-0.41055	0.0971111	0.291196	0.376533	0.716148	-0.583589	0.115423	0.283392	0.0247079	0.514831	0.323242	-0.120909	-0.148762	-0.0276522	-0.522494	-0.371648	-0.124786	-0.0787727	0.125079	-0.0588371	-0.340965	-0.0972539	-0.306646	-0.347159	-0.261035	0.825761	-0.0388896	-0.312785
-4.26469	-0.735384	0.260354	-0.556652	-0.605962	0.292708	-0.23501	0.257206	-0.621356	-0.166156	0.80483	-0.523499	-0.0993164	-0.051371	-0.188848	-0.424568	-0.108039	0.525808	0.271123	0.644106	-0.584137	-0.0841715	-0.412395	0.0962312	0.293993	0.375959	0.717301	-0.584679	0.115526	0.281691	0.024958	0.516021	0.32066	-0.122596	-0.151575	-0.0291811	-0.523813	-0.370413	-0.125224	-0.0771164	0.124961	-0.0584376	-0.341506	-0.0982447	-0.305409	-0.348406	-0.260998	0.826481	-0.0389798	-0.312101
-4.2637	-0.737148	0.258772	-0.557264	-0.605237	0.292295	-0.235118	0.25621	-0.620261	-0.166846	0.802233	-0.524528	-0.0998189	-0.0510858	-0.188346	-0.425992	-0.108922	0.525344	0.27067	0.643842	-0.583603	-0.0821566	-0.414237	0.0953471	0.296792	0.375381	0.718453	-0.585767	0.115634	0.280001	0.0252041	0.517197	0.31809	-0.124264	-0.154385	-0.0307103	-0.525121	-0.369181	-0.125685	-0.0754447	0.124828	-0.0580466	-0.34205	-0.0992425	-0.304171	-0.349646	-0.260958	0.827178	-0.0390609	-0.311418
-4.26272	-0.738916	0.257206	-0.557872	-0.604515	0.291867	-0.235224	0.255202	-0.619154	-0.167541	0.799622	-0.525566	-0.100305	-0.050797	-0.187856	-0.427389	-0.109796	0.524858	0.270211	0.643568	-0.583071	-0.0801545	-0.416075	0.0944588	0.299593	0.3748	0.719605	-0.586855	0.115749	0.278322	0.0254463	0.518359	0.315533	-0.125913	-0.157191	-0.0322399	-0.526421	-0.367952	-0.126171	-0.0737578	0.124681	-0.0576643	-0.342597	-0.100247	-0.302933	-0.350879	-0.260917	0.827852	-0.0391328	-0.310737
-4.26174	-0.740687	0.255655	-0.558477	-0.603796	0.291423	-0.235327	0.254182	-0.618035	-0.16824	0.796995	-0.526614	-0.100776	-0.0505047	-0.187379	-0.42876	-0.110661	0.524352	0.269745	0.643286	-0.58254	-0.0781654	-0.417909	0.0935665	0.302398	0.374215	0.720755	-0.587941	0.115869	0.276655	0.0256845	0.519505	0.31299	-0.127544	-0.159993	-0.0337696	-0.527711	-0.366726	-0.12668	-0.0720558	0.124519	-0.0572907	-0.343146	-0.101259	-0.301695	-0.352106	-0.260875	0.828502	-0.0391956	-0.310058
-4.26075	-0.742462	0.254119	-0.559079	-0.603082	0.290964	-0.235427	0.25315	-0.616903	-0.168945	0.794354	-0.527671	-0.101229	-0.0502088	-0.186916	-0.430104	-0.111518	0.523826	0.269273	0.642994	-0.582011	-0.0761895	-0.41974	0.09267	0.305204	0.373627	0.721904	-0.589026	0.115996	0.275	0.0259188	0.520637	0.31046	-0.129157	-0.16279	-0.0352993	-0.528991	-0.365504	-0.127213	-0.0703389	0.124343	-0.0569257	-0.343697	-0.102279	-0.300456	-0.353327	-0.26083	0.82913	-0.0392491	-0.30938
-4.25977	-0.744239	0.2526	-0.559678	-0.602371	0.29049	-0.235525	0.252107	-0.615758	-0.169654	0.791698	-0.528737	-0.101667	-0.0499095	-0.186466	-0.431421	-0.112367	0.523278	0.268794	0.642692	-0.581485	-0.0742269	-0.421566	0.0917696	0.308012	0.373035	0.723052	-0.590111	0.116128	0.273356	0.0261491	0.521754	0.307943	-0.13075	-0.165584	-0.0368291	-0.530262	-0.364285	-0.127769	-0.0686073	0.124151	-0.0565695	-0.34425	-0.103305	-0.299216	-0.354541	-0.260784	0.829734	-0.0392932	-0.308704
-4.25879	-0.74602	0.251096	-0.560274	-0.601663	0.29	-0.235621	0.251051	-0.614601	-0.170367	0.789027	-0.529813	-0.102088	-0.0496067	-0.186029	-0.432711	-0.113206	0.52271	0.268309	0.642382	-0.58096	-0.0722779	-0.423389	0.0908652	0.310822	0.37244	0.724198	-0.591194	0.116266	0.271725	0.0263754	0.522856	0.30544	-0.132325	-0.168373	-0.0383588	-0.531523	-0.36307	-0.128349	-0.0668611	0.123945	-0.0562219	-0.344806	-0.104339	-0.297976	-0.355747	-0.260736	0.830315	-0.039328	-0.308029
-4.2578	-0.747804	0.249609	-0.560867	-0.600959	0.289494	-0.235713	0.249984	-0.613432	-0.171085	0.786343	-0.530897	-0.102492	-0.0493006	-0.185605	-0.433973	-0.114037	0.522121	0.267817	0.642061	-0.580438	-0.0703426	-0.425207	0.089957	0.313633	0.371842	0.725342	-0.592276	0.11641	0.270105	0.0265978	0.523943	0.302951	-0.133881	-0.171157	-0.0398882	-0.532774	-0.361858	-0.128953	-0.0651007	0.123725	-0.0558832	-0.345364	-0.10538	-0.296735	-0.356947	-0.260686	0.830873	-0.0393534	-0.307357
-4.25682	-0.749591	0.248137	-0.561457	-0.600259	0.288973	-0.235804	0.248906	-0.612251	-0.171807	0.783645	-0.531991	-0.10288	-0.0489911	-0.185196	-0.435207	-0.114859	0.521511	0.26732	0.641732	-0.579917	-0.0684212	-0.427021	0.0890449	0.316445	0.37124	0.726485	-0.593357	0.116559	0.268497	0.0268161	0.525014	0.300476	-0.135418	-0.173938	-0.0414173	-0.534015	-0.360651	-0.12958	-0.063326	0.123489	-0.0555531	-0.345923	-0.106428	-0.295493	-0.35814	-0.260635	0.831407	-0.0393693	-0.306686
-4.25584	-0.751381	0.246682	-0.562045	-0.599562	0.288437	-0.235892	0.247816	-0.611057	-0.172534	0.780934	-0.533094	-0.103251	-0.0486784	-0.1848	-0.436413	-0.115672	0.52088	0.266816	0.641392	-0.579398	-0.0665139	-0.42883	0.0881291	0.319257	0.370635	0.727626	-0.594436	0.116713	0.266902	0.0270304	0.526069	0.298016	-0.136935	-0.176713	-0.0429461	-0.535246	-0.359447	-0.130231	-0.0615374	0.123238	-0.0552319	-0.346485	-0.107484	-0.29425	-0.359325	-0.260581	0.831919	-0.0393757	-0.306017
-4.25486	-0.753173	0.245243	-0.56263	-0.598869	0.287885	-0.235978	0.246716	-0.609852	-0.173264	0.77821	-0.534207	-0.103605	-0.0483625	-0.184418	-0.437591	-0.116477	0.520229	0.266306	0.641043	-0.578882	-0.0646207	-0.430635	0.0872097	0.322071	0.370027	0.728764	-0.595514	0.116872	0.265319	0.0272407	0.527109	0.29557	-0.138433	-0.179484	-0.0444743	-0.536467	-0.358248	-0.130906	-0.0597349	0.122973	-0.0549194	-0.347048	-0.108548	-0.293007	-0.360504	-0.260525	0.832406	-0.0393724	-0.30535
-4.25387	-0.754968	0.24382	-0.563212	-0.59818	0.287317	-0.236061	0.245605	-0.608635	-0.173999	0.775473	-0.535328	-0.103943	-0.0480435	-0.184049	-0.43874	-0.117272	0.519557	0.265791	0.640685	-0.578368	-0.062742	-0.432435	0.0862866	0.324884	0.369415	0.7299	-0.596591	0.117036	0.263748	0.0274469	0.528133	0.29314	-0.139912	-0.18225	-0.046002	-0.537678	-0.357053	-0.131603	-0.0579188	0.122693	-0.0546158	-0.347613	-0.109618	-0.291763	-0.361674	-0.260468	0.832871	-0.0393596	-0.304684
-4.25289	-0.756765	0.242414	-0.563792	-0.597494	0.286734	-0.236143	0.244483	-0.607406	-0.174737	0.772723	-0.536458	-0.104263	-0.0477214	-0.183695	-0.43986	-0.118059	0.518864	0.26527	0.640316	-0.577856	-0.0608777	-0.43423	0.0853599	0.327697	0.368801	0.731034	-0.597667	0.117206	0.26219	0.0276492	0.529141	0.290724	-0.141371	-0.185011	-0.047529	-0.538879	-0.355862	-0.132325	-0.0560893	0.122397	-0.0543209	-0.34818	-0.110697	-0.290518	-0.362837	-0.260408	0.833312	-0.039337	-0.304021
-4.25191	-0.758564	0.241024	-0.564369	-0.596813	0.286135	-0.236222	0.24335	-0.606165	-0.17548	0.769962	-0.537597	-0.104566	-0.0473962	-0.183355	-0.440952	-0.118836	0.518151	0.264743	0.639938	-0.577346	-0.0590282	-0.43602	0.0844298	0.33051	0.368183	0.732165	-0.598741	0.117379	0.260644	0.0278473	0.530133	0.288323	-0.14281	-0.187767	-0.0490552	-0.540069	-0.354676	-0.133069	-0.0542465	0.122087	-0.0540348	-0.348748	-0.111783	-0.289271	-0.363993	-0.260347	0.83373	-0.0393047	-0.30336
-4.25092	-0.760366	0.239651	-0.564944	-0.596134	0.285521	-0.236299	0.242208	-0.604913	-0.176226	0.767188	-0.538746	-0.104852	-0.0470681	-0.183029	-0.442014	-0.119605	0.517417	0.264211	0.63955	-0.576838	-0.0571936	-0.437806	0.0834962	0.333322	0.367562	0.733293	-0.599813	0.117558	0.259111	0.0280415	0.531109	0.285938	-0.14423	-0.190518	-0.0505806	-0.541249	-0.353495	-0.133837	-0.0523907	0.121761	-0.0537576	-0.349318	-0.112877	-0.288024	-0.36514	-0.260283	0.834125	-0.0392626	-0.3027
-4.24994	-0.762169	0.238295	-0.565516	-0.59546	0.284891	-0.236374	0.241055	-0.60365	-0.176975	0.764403	-0.539903	-0.105121	-0.0467371	-0.182718	-0.443046	-0.120365	0.516663	0.263673	0.639152	-0.576332	-0.0553739	-0.439586	0.0825593	0.336134	0.366938	0.734419	-0.600884	0.117741	0.257591	0.0282316	0.532068	0.283569	-0.14563	-0.193264	-0.052105	-0.542418	-0.352319	-0.134627	-0.050522	0.121421	-0.0534891	-0.349889	-0.113979	-0.286776	-0.36628	-0.260218	0.834496	-0.0392107	-0.302043
-4.24896	-0.763975	0.236955	-0.566086	-0.594789	0.284245	-0.236446	0.239892	-0.602375	-0.177728	0.761606	-0.541069	-0.105373	-0.0464033	-0.18242	-0.44405	-0.121115	0.515888	0.26313	0.638745	-0.575829	-0.0535695	-0.441361	0.0816191	0.338944	0.36631	0.735541	-0.601953	0.117929	0.256083	0.0284176	0.533011	0.281215	-0.14701	-0.196005	-0.0536284	-0.543577	-0.351147	-0.135441	-0.0486406	0.121065	-0.0532295	-0.350462	-0.115088	-0.285527	-0.367412	-0.26015	0.834844	-0.0391489	-0.301387
-4.24797	-0.765782	0.235633	-0.566653	-0.594122	0.283584	-0.236517	0.23872	-0.601089	-0.178484	0.758798	-0.542243	-0.105607	-0.0460666	-0.182138	-0.445023	-0.121857	0.515092	0.262582	0.638327	-0.575327	-0.0517804	-0.443131	0.0806757	0.341753	0.36568	0.73666	-0.603021	0.118121	0.254589	0.0285996	0.533936	0.278878	-0.14837	-0.19874	-0.0551506	-0.544725	-0.349981	-0.136278	-0.0467467	0.120695	-0.0529787	-0.351036	-0.116205	-0.284276	-0.368535	-0.26008	0.835169	-0.0390772	-0.300734
-4.24699	-0.767591	0.234327	-0.567219	-0.593459	0.282908	-0.236586	0.237537	-0.599792	-0.179244	0.75598	-0.543427	-0.105824	-0.0457272	-0.18187	-0.445966	-0.12259	0.514276	0.262029	0.637899	-0.574828	-0.0500067	-0.444895	0.0797291	0.34456	0.365046	0.737776	-0.604087	0.118316	0.253108	0.0287774	0.534845	0.276557	-0.149709	-0.201469	-0.0566717	-0.545862	-0.34882	-0.137138	-0.0448406	0.120309	-0.0527367	-0.351611	-0.11733	-0.283024	-0.369651	-0.260008	0.835471	-0.0389955	-0.300082
-4.24601	-0.769401	0.233038	-0.567782	-0.5928	0.282216	-0.236653	0.236346	-0.598484	-0.180007	0.753151	-0.544619	-0.106023	-0.0453852	-0.181616	-0.446879	-0.123313	0.51344	0.261471	0.637462	-0.574331	-0.0482487	-0.446653	0.0787794	0.347364	0.36441	0.738888	-0.605152	0.118516	0.251639	0.0289513	0.535737	0.274252	-0.151029	-0.204194	-0.0581914	-0.546989	-0.347664	-0.138021	-0.0429224	0.119908	-0.0525035	-0.352187	-0.118463	-0.281771	-0.370758	-0.259934	0.835749	-0.0389038	-0.299433
-4.24503	-0.771213	0.231767	-0.568343	-0.592144	0.281508	-0.236719	0.235145	-0.597165	-0.180772	0.750313	-0.54582	-0.106205	-0.0450405	-0.181378	-0.447761	-0.124027	0.512583	0.260908	0.637014	-0.573837	-0.0465064	-0.448406	0.0778266	0.350167	0.363771	0.739996	-0.606214	0.11872	0.250184	0.029121	0.536612	0.271964	-0.152328	-0.206912	-0.0597097	-0.548105	-0.346514	-0.138927	-0.0409922	0.119491	-0.0522791	-0.352764	-0.119604	-0.280516	-0.371856	-0.259858	0.836004	-0.038802	-0.298786
-4.24404	-0.773026	0.230513	-0.568902	-0.591492	0.280784	-0.236782	0.233935	-0.595835	-0.181541	0.747464	-0.547029	-0.106369	-0.0446933	-0.181154	-0.448613	-0.124732	0.511705	0.26034	0.636557	-0.573345	-0.0447801	-0.450153	0.0768709	0.352967	0.363128	0.7411	-0.607275	0.118928	0.248742	0.0292867	0.53747	0.269693	-0.153607	-0.209625	-0.0612265	-0.549209	-0.345369	-0.139855	-0.0390504	0.11906	-0.0520635	-0.353342	-0.120753	-0.27926	-0.372946	-0.25978	0.836235	-0.0386901	-0.298141
-4.24306	-0.774841	0.229276	-0.56946	-0.590844	0.280046	-0.236844	0.232716	-0.594495	-0.182312	0.744606	-0.548247	-0.106515	-0.0443436	-0.180945	-0.449433	-0.125428	0.510808	0.259768	0.636089	-0.572855	-0.0430698	-0.451895	0.0759123	0.355764	0.362483	0.7422	-0.608334	0.119139	0.247314	0.0294483	0.53831	0.267439	-0.154865	-0.212332	-0.0627417	-0.550303	-0.34423	-0.140806	-0.0370971	0.118613	-0.0518566	-0.353921	-0.12191	-0.278003	-0.374027	-0.259699	0.836444	-0.038568	-0.297498
-4.24208	-0.776656	0.228056	-0.570015	-0.590199	0.279291	-0.236904	0.231488	-0.593145	-0.183087	0.741738	-0.549474	-0.106644	-0.0439914	-0.180752	-0.450223	-0.126115	0.50989	0.259191	0.635611	-0.572367	-0.0413758	-0.45363	0.0749509	0.358558	0.361834	0.743295	-0.609392	0.119354	0.245898	0.0296058	0.539133	0.265202	-0.156102	-0.215033	-0.0642553	-0.551386	-0.343097	-0.14178	-0.0351325	0.118151	-0.0516586	-0.354501	-0.123075	-0.276744	-0.3751	-0.259617	0.836629	-0.0384358	-0.296857
-4.24109	-0.778472	0.226853	-0.570568	-0.589558	0.278522	-0.236962	0.230252	-0.591784	-0.183863	0.738861	-0.550708	-0.106755	-0.0436369	-0.180573	-0.450981	-0.126793	0.508951	0.25861	0.635123	-0.571881	-0.039698	-0.45536	0.0739867	0.361349	0.361183	0.744387	-0.610447	0.119572	0.244497	0.0297593	0.539938	0.262982	-0.157319	-0.217728	-0.0657671	-0.552457	-0.34197	-0.142776	-0.0331567	0.117674	-0.0514693	-0.355081	-0.124248	-0.275483	-0.376163	-0.259532	0.836791	-0.0382934	-0.296219
-4.24011	-0.780289	0.225668	-0.571119	-0.588921	0.277736	-0.237019	0.229007	-0.590412	-0.184642	0.735976	-0.551951	-0.106848	-0.0432801	-0.18041	-0.451708	-0.127461	0.507992	0.258025	0.634625	-0.571398	-0.0380368	-0.457083	0.0730198	0.364136	0.360529	0.745473	-0.611501	0.119793	0.243108	0.0299086	0.540725	0.26078	-0.158515	-0.220416	-0.067277	-0.553517	-0.340849	-0.143794	-0.0311702	0.117181	-0.0512887	-0.355662	-0.125429	-0.274221	-0.377218	-0.259444	0.83693	-0.0381406	-0.295583
-4.23913	-0.782106	0.224501	-0.571669	-0.588288	0.276936	-0.237074	0.227754	-0.589031	-0.185424	0.733083	-0.553203	-0.106923	-0.042921	-0.180261	-0.452403	-0.12812	0.507013	0.257436	0.634117	-0.570917	-0.0363921	-0.4588	0.0720503	0.366919	0.359872	0.746555	-0.612552	0.120017	0.241734	0.0300539	0.541494	0.258595	-0.159691	-0.223099	-0.0687851	-0.554566	-0.339734	-0.144835	-0.0291729	0.116674	-0.0511169	-0.356243	-0.126618	-0.272957	-0.378264	-0.259355	0.837045	-0.0379776	-0.294949
-4.23814	-0.783925	0.223351	-0.572217	-0.587658	0.27612	-0.237128	0.226493	-0.58764	-0.186208	0.730181	-0.554463	-0.106981	-0.0425597	-0.180128	-0.453067	-0.12877	0.506014	0.256843	0.633598	-0.570439	-0.0347642	-0.460511	0.0710782	0.369698	0.359212	0.747631	-0.613602	0.120245	0.240373	0.0301951	0.542245	0.256429	-0.160845	-0.225775	-0.0702911	-0.555604	-0.338625	-0.145898	-0.0271652	0.116151	-0.0509538	-0.356825	-0.127816	-0.271692	-0.3793	-0.259263	0.837138	-0.0378043	-0.294317
-4.23716	-0.785743	0.222219	-0.572763	-0.587032	0.275288	-0.23718	0.225224	-0.586239	-0.186994	0.727271	-0.55573	-0.10702	-0.0421963	-0.180011	-0.453698	-0.12941	0.504995	0.256245	0.63307	-0.569962	-0.0331532	-0.462215	0.0701037	0.372472	0.35855	0.748703	-0.61465	0.120475	0.239025	0.0303322	0.542978	0.25428	-0.161978	-0.228445	-0.071795	-0.55663	-0.337523	-0.146982	-0.0251471	0.115612	-0.0507994	-0.357407	-0.129022	-0.270424	-0.380327	-0.259169	0.837207	-0.0376205	-0.293688
-4.23618	-0.787562	0.221104	-0.573307	-0.58641	0.274442	-0.237231	0.223947	-0.584828	-0.187781	0.724354	-0.557006	-0.107041	-0.0418309	-0.179909	-0.454297	-0.130042	0.503955	0.255644	0.632531	-0.569488	-0.0315592	-0.463913	0.0691266	0.375242	0.357884	0.749769	-0.615695	0.120708	0.237691	0.0304652	0.543692	0.25215	-0.163091	-0.231108	-0.0732967	-0.557645	-0.336427	-0.148089	-0.0231191	0.115059	-0.0506537	-0.35799	-0.130236	-0.269155	-0.381345	-0.259072	0.837253	-0.0374264	-0.293061
-4.23519	-0.78938	0.220007	-0.57385	-0.585791	0.27358	-0.237281	0.222663	-0.583407	-0.188571	0.72143	-0.55829	-0.107044	-0.0414635	-0.179823	-0.454864	-0.130664	0.502896	0.25504	0.631982	-0.569016	-0.0299823	-0.465604	0.0681473	0.378007	0.357216	0.750829	-0.616739	0.120944	0.236372	0.0305942	0.544389	0.250038	-0.164182	-0.233765	-0.0747961	-0.558648	-0.335338	-0.149218	-0.0210812	0.11449	-0.0505166	-0.358572	-0.131458	-0.267884	-0.382354	-0.258973	0.837277	-0.0372218	-0.292437
-4.23421	-0.791199	0.218927	-0.574392	-0.585177	0.272703	-0.237329	0.221371	-0.581978	-0.189363	0.718498	-0.559582	-0.10703	-0.0410941	-0.179752	-0.455398	-0.131276	0.501816	0.254432	0.631423	-0.568547	-0.0284226	-0.467289	0.0671656	0.380766	0.356545	0.751883	-0.61778	0.121182	0.235066	0.030719	0.545066	0.247945	-0.165252	-0.236415	-0.0762932	-0.55964	-0.334256	-0.150368	-0.0190337	0.113906	-0.0503881	-0.359155	-0.132688	-0.266611	-0.383352	-0.258872	0.837277	-0.0370067	-0.291814
-4.23323	-0.793018	0.217866	-0.574932	-0.584565	0.27181	-0.237375	0.220072	-0.580538	-0.190156	0.71556	-0.560882	-0.106996	-0.0407228	-0.179697	-0.4559	-0.13188	0.500717	0.25382	0.630854	-0.56808	-0.0268803	-0.468966	0.0661818	0.38352	0.355872	0.752932	-0.61882	0.121422	0.233773	0.0308398	0.545725	0.245871	-0.166301	-0.239058	-0.0777879	-0.56062	-0.333181	-0.15154	-0.0169767	0.113306	-0.0502682	-0.359737	-0.133927	-0.265336	-0.384341	-0.258769	0.837254	-0.0367812	-0.291195
-4.23225	-0.794836	0.216822	-0.57547	-0.583958	0.270903	-0.237421	0.218766	-0.57909	-0.19095	0.712616	-0.56219	-0.106945	-0.0403498	-0.179657	-0.456368	-0.132474	0.499597	0.253205	0.630275	-0.567615	-0.0253555	-0.470637	0.0651958	0.386268	0.355195	0.753974	-0.619857	0.121665	0.232495	0.0309566	0.546365	0.243815	-0.167328	-0.241695	-0.07928	-0.561588	-0.332113	-0.152733	-0.0149105	0.112691	-0.0501569	-0.36032	-0.135174	-0.264059	-0.385321	-0.258663	0.837209	-0.0365451	-0.290577
-4.23126	-0.796654	0.215796	-0.576007	-0.583354	0.26998	-0.237465	0.217453	-0.577633	-0.191746	0.709665	-0.563505	-0.106876	-0.0399749	-0.179634	-0.456804	-0.133059	0.498458	0.252587	0.629685	-0.567152	-0.0238483	-0.472301	0.0642077	0.38901	0.354516	0.755011	-0.620892	0.121909	0.231231	0.0310692	0.546986	0.241778	-0.168334	-0.244324	-0.0807696	-0.562544	-0.331051	-0.153948	-0.0128354	0.112061	-0.0500542	-0.360902	-0.13643	-0.26278	-0.38629	-0.258554	0.83714	-0.0362985	-0.289962
-4.23028	-0.798472	0.214788	-0.576542	-0.582753	0.269042	-0.237509	0.216133	-0.576167	-0.192544	0.706708	-0.564828	-0.106788	-0.0395984	-0.179626	-0.457206	-0.133634	0.497299	0.251966	0.629085	-0.566692	-0.0223588	-0.473959	0.0632175	0.391745	0.353835	0.75604	-0.621925	0.122156	0.22998	0.0311778	0.547588	0.23976	-0.169318	-0.246946	-0.0822564	-0.563489	-0.329997	-0.155184	-0.0107514	0.111416	-0.04996	-0.361484	-0.137694	-0.261499	-0.38725	-0.258443	0.837049	-0.0360412	-0.28935
-4.2293	-0.800289	0.213798	-0.577077	-0.582156	0.26809	-0.237551	0.214807	-0.574692	-0.193342	0.703746	-0.566159	-0.106682	-0.0392203	-0.179634	-0.457575	-0.134201	0.49612	0.251342	0.628475	-0.566234	-0.0208872	-0.475609	0.0622255	0.394474	0.353151	0.757063	-0.622956	0.122404	0.228744	0.0312824	0.548171	0.237762	-0.170281	-0.249561	-0.0837405	-0.564422	-0.32895	-0.15644	-0.00865895	0.110756	-0.0498742	-0.362066	-0.138966	-0.260216	-0.3882	-0.25833	0.836935	-0.0357734	-0.28874
-4.22831	-0.802105	0.212826	-0.577609	-0.581563	0.267122	-0.237592	0.213475	-0.573208	-0.194142	0.700779	-0.567497	-0.106557	-0.0388407	-0.179658	-0.457911	-0.134758	0.494921	0.250716	0.627855	-0.565779	-0.0194335	-0.477252	0.0612315	0.397196	0.352464	0.758079	-0.623984	0.122654	0.227521	0.0313829	0.548735	0.235783	-0.171222	-0.252169	-0.0852217	-0.565343	-0.327911	-0.157718	-0.00655811	0.11008	-0.0497969	-0.362647	-0.140247	-0.25893	-0.389139	-0.258214	0.836798	-0.0354949	-0.288132
-4.22733	-0.80392	0.211872	-0.578141	-0.580973	0.26614	-0.237632	0.212136	-0.571716	-0.194942	0.697807	-0.568843	-0.106414	-0.0384595	-0.179698	-0.458213	-0.135305	0.493703	0.250086	0.627225	-0.565325	-0.0179978	-0.478887	0.0602358	0.399911	0.351774	0.759088	-0.62501	0.122906	0.226313	0.0314793	0.549279	0.233824	-0.172142	-0.25477	-0.0867	-0.566252	-0.326879	-0.159017	-0.00444915	0.109389	-0.0497281	-0.363228	-0.141536	-0.257642	-0.390068	-0.258096	0.836639	-0.0352058	-0.287527
-4.22635	-0.805734	0.210936	-0.578671	-0.580386	0.265143	-0.23767	0.210791	-0.570216	-0.195743	0.694829	-0.570196	-0.106253	-0.0380769	-0.179754	-0.458481	-0.135844	0.492465	0.249454	0.626584	-0.564874	-0.0165803	-0.480516	0.0592383	0.402619	0.351082	0.760089	-0.626034	0.123159	0.225119	0.0315717	0.549804	0.231884	-0.17304	-0.257363	-0.0881753	-0.567149	-0.325855	-0.160336	-0.00233228	0.108683	-0.0496675	-0.363808	-0.142834	-0.256352	-0.390988	-0.257975	0.836457	-0.034906	-0.286925
-4.22536	-0.807547	0.210018	-0.579201	-0.579803	0.264131	-0.237708	0.209441	-0.568708	-0.196545	0.691848	-0.571556	-0.106073	-0.0376929	-0.179827	-0.458716	-0.136373	0.491207	0.24882	0.625934	-0.564425	-0.015181	-0.482137	0.0582392	0.405319	0.350387	0.761083	-0.627055	0.123414	0.223939	0.0316601	0.550309	0.229965	-0.173916	-0.259948	-0.0896475	-0.568034	-0.324838	-0.161676	-0.000207729	0.107962	-0.0496154	-0.364387	-0.14414	-0.255059	-0.391896	-0.257852	0.836252	-0.0345955	-0.286325
-4.22438	-0.809359	0.209118	-0.579729	-0.579224	0.263104	-0.237746	0.208084	-0.567191	-0.197347	0.688862	-0.572924	-0.105875	-0.0373077	-0.179915	-0.458916	-0.136892	0.48993	0.248183	0.625273	-0.563978	-0.0138002	-0.48375	0.0572384	0.408011	0.34969	0.762069	-0.628074	0.123669	0.222772	0.0317444	0.550794	0.228065	-0.174771	-0.262526	-0.0911166	-0.568906	-0.323829	-0.163036	0.00192429	0.107226	-0.0495715	-0.364966	-0.145455	-0.253764	-0.392794	-0.257726	0.836025	-0.0342743	-0.285727
-4.2234	-0.811169	0.208236	-0.580256	-0.578648	0.262063	-0.237782	0.206722	-0.565667	-0.19815	0.685872	-0.574299	-0.105659	-0.0369212	-0.18002	-0.459082	-0.137403	0.488633	0.247544	0.624603	-0.563534	-0.0124377	-0.485356	0.0562362	0.410695	0.34899	0.763048	-0.629091	0.123926	0.22162	0.0318248	0.55126	0.226185	-0.175603	-0.265096	-0.0925824	-0.569767	-0.322828	-0.164417	0.00406355	0.106474	-0.0495359	-0.365543	-0.146778	-0.252466	-0.393682	-0.257598	0.835776	-0.0339423	-0.285132
-4.22242	-0.812977	0.207372	-0.580782	-0.578075	0.261007	-0.237817	0.205355	-0.564135	-0.198953	0.682879	-0.57568	-0.105424	-0.0365335	-0.180141	-0.459214	-0.137904	0.487317	0.246903	0.623922	-0.563092	-0.0110938	-0.486955	0.0552325	0.41337	0.348288	0.764018	-0.630105	0.124184	0.220483	0.0319011	0.551705	0.224326	-0.176414	-0.267659	-0.0940449	-0.570615	-0.321835	-0.165817	0.00620983	0.105708	-0.0495086	-0.36612	-0.14811	-0.251166	-0.394559	-0.257467	0.835504	-0.0335996	-0.28454
-4.22143	-0.814784	0.206527	-0.581307	-0.577506	0.259937	-0.237852	0.203983	-0.562596	-0.199756	0.679882	-0.577069	-0.10517	-0.0361447	-0.180278	-0.459312	-0.138396	0.485982	0.24626	0.623231	-0.562652	-0.00976856	-0.488546	0.0542273	0.416037	0.347583	0.76498	-0.631117	0.124442	0.219359	0.0319734	0.552131	0.222486	-0.177203	-0.270213	-0.095504	-0.571452	-0.320851	-0.167238	0.00836291	0.104926	-0.0494893	-0.366695	-0.14945	-0.249864	-0.395426	-0.257334	0.83521	-0.0332462	-0.28395
-4.22045	-0.816589	0.205699	-0.58183	-0.576939	0.258852	-0.237885	0.202605	-0.561049	-0.20056	0.676882	-0.578465	-0.104898	-0.0357549	-0.180431	-0.459375	-0.138878	0.484627	0.245616	0.62253	-0.562214	-0.00846205	-0.490129	0.0532209	0.418695	0.346876	0.765934	-0.632127	0.124701	0.218249	0.0320417	0.552536	0.220668	-0.177969	-0.272759	-0.0969596	-0.572276	-0.319874	-0.168678	0.0105226	0.10413	-0.0494783	-0.36727	-0.150799	-0.248558	-0.396281	-0.257198	0.834893	-0.0328819	-0.283363
-4.21947	-0.818392	0.20489	-0.582353	-0.576376	0.257754	-0.237919	0.201223	-0.559495	-0.201363	0.67388	-0.579867	-0.104608	-0.0353641	-0.180601	-0.459403	-0.139352	0.483253	0.244969	0.621819	-0.561778	-0.00717436	-0.491705	0.0522132	0.421343	0.346166	0.766878	-0.633134	0.124961	0.217154	0.0321061	0.552921	0.218869	-0.178714	-0.275298	-0.0984117	-0.573087	-0.318905	-0.170138	0.0126886	0.103318	-0.0494753	-0.367843	-0.152156	-0.24725	-0.397126	-0.257059	0.834555	-0.0325069	-0.282778
-4.21848	-0.820193	0.204098	-0.582875	-0.575817	0.256641	-0.237951	0.199836	-0.557933	-0.202166	0.670874	-0.581277	-0.104298	-0.0349724	-0.180787	-0.459397	-0.139816	0.48186	0.244321	0.621098	-0.561344	-0.00590558	-0.493272	0.0512044	0.423983	0.345454	0.767814	-0.634138	0.125221	0.216072	0.0321665	0.553286	0.217092	-0.179437	-0.277828	-0.0998602	-0.573887	-0.317945	-0.171617	0.0148607	0.102492	-0.0494803	-0.368415	-0.153522	-0.24594	-0.39796	-0.256918	0.834194	-0.032121	-0.282197
-4.2175	-0.821992	0.203325	-0.583396	-0.57526	0.255513	-0.237983	0.198444	-0.556365	-0.202969	0.667867	-0.582693	-0.103971	-0.0345799	-0.18099	-0.459356	-0.140271	0.480448	0.243672	0.620368	-0.560913	-0.00465579	-0.494832	0.0501944	0.426612	0.344739	0.768741	-0.63514	0.125481	0.215005	0.0322229	0.55363	0.215335	-0.180137	-0.28035	-0.101305	-0.574673	-0.316993	-0.173115	0.0170387	0.10165	-0.0494934	-0.368985	-0.154896	-0.244626	-0.398783	-0.256775	0.833812	-0.0317244	-0.281617
-4.21652	-0.823789	0.20257	-0.583916	-0.574707	0.254372	-0.238014	0.197048	-0.55479	-0.203771	0.664857	-0.584115	-0.103625	-0.0341865	-0.181209	-0.45928	-0.140716	0.479017	0.243021	0.619627	-0.560484	-0.00342508	-0.496384	0.0491834	0.429232	0.344022	0.769659	-0.63614	0.125742	0.213952	0.0322753	0.553954	0.213599	-0.180816	-0.282863	-0.102746	-0.575448	-0.31605	-0.174633	0.0192224	0.100794	-0.0495143	-0.369554	-0.156279	-0.24331	-0.399594	-0.256629	0.833407	-0.0313169	-0.28104
-4.21553	-0.825582	0.201833	-0.584436	-0.574156	0.253217	-0.238044	0.195648	-0.553209	-0.204572	0.661846	-0.585544	-0.10326	-0.0337925	-0.181444	-0.459169	-0.141153	0.477567	0.242369	0.618877	-0.560056	-0.00221352	-0.497928	0.0481715	0.431841	0.343302	0.770567	-0.637137	0.126002	0.212913	0.0323238	0.554257	0.211885	-0.181472	-0.285368	-0.104183	-0.57621	-0.315115	-0.176169	0.0214115	0.0999232	-0.0495432	-0.370121	-0.157671	-0.241991	-0.400395	-0.25648	0.832981	-0.0308986	-0.280466
-4.21455	-0.827374	0.201115	-0.584954	-0.573609	0.252048	-0.238075	0.194244	-0.551621	-0.205373	0.658833	-0.586979	-0.102877	-0.0333977	-0.181696	-0.459022	-0.14158	0.476098	0.241716	0.618117	-0.559631	-0.0010212	-0.499464	0.0471586	0.43444	0.34258	0.771465	-0.638131	0.126263	0.211888	0.0323684	0.554539	0.210191	-0.182106	-0.287865	-0.105617	-0.576959	-0.314189	-0.177725	0.0236059	0.0990374	-0.0495799	-0.370687	-0.159071	-0.240669	-0.401184	-0.256329	0.832532	-0.0304695	-0.279895
-4.21357	-0.829162	0.200414	-0.585472	-0.573065	0.250866	-0.238104	0.192836	-0.550027	-0.206173	0.655819	-0.588421	-0.102475	-0.0330024	-0.181964	-0.458841	-0.141998	0.47461	0.241061	0.617347	-0.559208	0.000151816	-0.500992	0.0461449	0.437029	0.341856	0.772354	-0.639123	0.126523	0.210877	0.0324091	0.554801	0.208518	-0.182718	-0.290352	-0.107046	-0.577697	-0.313272	-0.179298	0.0258052	0.098137	-0.0496243	-0.371251	-0.160479	-0.239343	-0.401963	-0.256175	0.832062	-0.0300296	-0.279326
-4.21258	-0.830948	0.199732	-0.585988	-0.572523	0.249669	-0.238133	0.191424	-0.548426	-0.206972	0.652804	-0.589868	-0.102054	-0.0326066	-0.182249	-0.458624	-0.142407	0.473104	0.240406	0.616567	-0.558787	0.00130545	-0.502511	0.0451305	0.439606	0.341129	0.773232	-0.640112	0.126783	0.209881	0.0324459	0.555042	0.206867	-0.183308	-0.292831	-0.108471	-0.578421	-0.312363	-0.180891	0.0280093	0.0972218	-0.0496765	-0.371813	-0.161896	-0.238015	-0.402729	-0.256018	0.831571	-0.0295788	-0.27876
-4.2116	-0.832731	0.199068	-0.586504	-0.571985	0.24846	-0.238162	0.190009	-0.54682	-0.20777	0.649788	-0.591322	-0.101616	-0.0322103	-0.182551	-0.458372	-0.142807	0.471579	0.239751	0.615778	-0.558368	0.00243964	-0.504023	0.0441154	0.442173	0.3404	0.7741	-0.641098	0.127043	0.208898	0.0324788	0.555261	0.205237	-0.183876	-0.295301	-0.109892	-0.579133	-0.311464	-0.182501	0.0302179	0.0962921	-0.0497364	-0.372373	-0.163322	-0.236684	-0.403485	-0.255859	0.831058	-0.0291172	-0.278197
-4.21062	-0.83451	0.198422	-0.58702	-0.571449	0.247236	-0.23819	0.18859	-0.545208	-0.208567	0.646771	-0.592782	-0.101158	-0.0318136	-0.182869	-0.458084	-0.143198	0.470035	0.239095	0.614979	-0.557951	0.00355431	-0.505526	0.0430996	0.444728	0.339668	0.774958	-0.642082	0.127302	0.207929	0.0325078	0.55546	0.203628	-0.184421	-0.297763	-0.111309	-0.579832	-0.310573	-0.184129	0.0324308	0.0953478	-0.0498038	-0.37293	-0.164756	-0.23535	-0.404228	-0.255697	0.830523	-0.0286448	-0.277636
-4.20964	-0.836286	0.197794	-0.587534	-0.570917	0.246	-0.238218	0.187168	-0.54359	-0.209363	0.643755	-0.594248	-0.100682	-0.0314166	-0.183203	-0.457761	-0.14358	0.468473	0.238438	0.61417	-0.557536	0.0046494	-0.507021	0.0420833	0.447271	0.338934	0.775805	-0.643064	0.12756	0.206975	0.0325329	0.555637	0.202041	-0.184944	-0.300215	-0.112722	-0.580519	-0.309691	-0.185776	0.0346478	0.094389	-0.0498788	-0.373486	-0.166199	-0.234013	-0.404961	-0.255533	0.829968	-0.0281615	-0.277078
-4.20865	-0.838059	0.197184	-0.588048	-0.570387	0.24475	-0.238246	0.185743	-0.541967	-0.210157	0.640738	-0.595719	-0.100188	-0.0310193	-0.183554	-0.457402	-0.143952	0.466892	0.237781	0.613352	-0.557123	0.00572484	-0.508507	0.0410666	0.449803	0.338198	0.776641	-0.644042	0.127817	0.206034	0.0325542	0.555794	0.200476	-0.185444	-0.302658	-0.11413	-0.581193	-0.308819	-0.18744	0.0368687	0.0934157	-0.0499613	-0.37404	-0.16765	-0.232673	-0.405681	-0.255366	0.829391	-0.0276674	-0.276523
-4.20767	-0.839829	0.196592	-0.588562	-0.569859	0.243487	-0.238273	0.184315	-0.540339	-0.210949	0.637722	-0.597196	-0.0996746	-0.0306219	-0.183922	-0.457007	-0.144316	0.465293	0.237123	0.612525	-0.556712	0.00678058	-0.509985	0.0400494	0.452322	0.337459	0.777466	-0.645018	0.128074	0.205107	0.0325717	0.555928	0.198932	-0.185923	-0.305092	-0.115534	-0.581854	-0.307956	-0.189121	0.0390931	0.0924282	-0.0500512	-0.374591	-0.16911	-0.231329	-0.40639	-0.255197	0.828792	-0.0271625	-0.27597
-4.20669	-0.841594	0.196019	-0.589074	-0.569335	0.242211	-0.2383	0.182885	-0.538705	-0.21174	0.634706	-0.598679	-0.0991432	-0.0302242	-0.184306	-0.456577	-0.144671	0.463676	0.236466	0.611688	-0.556302	0.00781656	-0.511455	0.0390319	0.45483	0.336718	0.77828	-0.645992	0.128329	0.204194	0.0325854	0.556042	0.19741	-0.186379	-0.307516	-0.116934	-0.582503	-0.307102	-0.19082	0.0413209	0.0914263	-0.0501485	-0.37514	-0.170578	-0.229982	-0.407088	-0.255025	0.828173	-0.0266468	-0.27542
-4.2057	-0.843356	0.195463	-0.589586	-0.568812	0.240922	-0.238327	0.181451	-0.537067	-0.212528	0.631691	-0.600167	-0.0985932	-0.0298266	-0.184707	-0.456111	-0.145016	0.462041	0.235808	0.610841	-0.555895	0.00883272	-0.512916	0.0380141	0.457324	0.335975	0.779082	-0.646962	0.128583	0.203295	0.0325952	0.556134	0.195909	-0.186812	-0.309931	-0.118329	-0.583139	-0.306257	-0.192535	0.0435519	0.0904101	-0.050253	-0.375686	-0.172055	-0.228632	-0.407773	-0.25485	0.827533	-0.0261203	-0.274873
-4.20472	-0.845114	0.194926	-0.590097	-0.568293	0.239621	-0.238353	0.180016	-0.535423	-0.213315	0.628677	-0.601661	-0.0980249	-0.0294289	-0.185124	-0.455609	-0.145353	0.460387	0.235151	0.609986	-0.555489	0.00982901	-0.514369	0.0369961	0.459806	0.335229	0.779872	-0.64793	0.128836	0.20241	0.0326013	0.556204	0.194431	-0.187224	-0.312337	-0.119719	-0.583763	-0.305421	-0.194268	0.0457857	0.0893798	-0.0503648	-0.37623	-0.17354	-0.227279	-0.408447	-0.254673	0.826872	-0.025583	-0.274328
-4.20374	-0.846868	0.194406	-0.590608	-0.567776	0.238306	-0.23838	0.178578	-0.533775	-0.2141	0.625664	-0.603159	-0.0974381	-0.0290312	-0.185558	-0.455071	-0.145681	0.458716	0.234494	0.609121	-0.555085	0.0108054	-0.515813	0.035978	0.462275	0.334481	0.780651	-0.648896	0.129088	0.201538	0.0326036	0.556253	0.192974	-0.187613	-0.314733	-0.121105	-0.584373	-0.304595	-0.196017	0.0480223	0.0883354	-0.0504838	-0.376771	-0.175033	-0.225922	-0.409108	-0.254493	0.82619	-0.0250349	-0.273787
-4.20275	-0.848618	0.193905	-0.591118	-0.567261	0.23698	-0.238406	0.177138	-0.532123	-0.214882	0.622652	-0.604663	-0.0968328	-0.0286337	-0.186009	-0.454497	-0.146	0.457026	0.233837	0.608247	-0.554683	0.0117618	-0.517248	0.0349599	0.464731	0.333731	0.781417	-0.649858	0.129338	0.200681	0.0326022	0.55628	0.19154	-0.187979	-0.317119	-0.122486	-0.584971	-0.303779	-0.197783	0.0502613	0.087277	-0.0506098	-0.377309	-0.176535	-0.224562	-0.409758	-0.254311	0.825488	-0.0244761	-0.273248
-4.20177	-0.850363	0.193421	-0.591628	-0.566748	0.23564	-0.238432	0.175695	-0.530466	-0.215662	0.619643	-0.606172	-0.0962093	-0.0282364	-0.186476	-0.453888	-0.14631	0.455319	0.233181	0.607364	-0.554283	0.0126981	-0.518675	0.0339417	0.467173	0.332979	0.782171	-0.650818	0.129586	0.199837	0.032597	0.556286	0.190127	-0.188323	-0.319496	-0.123863	-0.585556	-0.302972	-0.199565	0.0525025	0.0862046	-0.0507429	-0.377845	-0.178046	-0.223198	-0.410396	-0.254126	0.824765	-0.0239065	-0.272711
-4.20079	-0.852104	0.192956	-0.592136	-0.566238	0.234289	-0.238458	0.174251	-0.528806	-0.21644	0.616635	-0.607686	-0.0955673	-0.0278393	-0.186959	-0.453242	-0.146611	0.453594	0.232526	0.606472	-0.553884	0.0136145	-0.520093	0.0329237	0.469602	0.332224	0.782913	-0.651775	0.129833	0.199006	0.0325881	0.556269	0.188737	-0.188645	-0.321862	-0.125234	-0.586128	-0.302175	-0.201363	0.0547456	0.0851184	-0.0508829	-0.378377	-0.179565	-0.221831	-0.411021	-0.253939	0.824021	-0.0233262	-0.272178
-4.19981	-0.85384	0.192508	-0.592645	-0.56573	0.232925	-0.238484	0.172806	-0.527141	-0.217215	0.61363	-0.609205	-0.0949071	-0.0274426	-0.18746	-0.45256	-0.146903	0.451851	0.231871	0.605571	-0.553487	0.0145107	-0.521503	0.0319057	0.472016	0.331467	0.783642	-0.652729	0.130077	0.198189	0.0325755	0.556231	0.187369	-0.188945	-0.324219	-0.126601	-0.586688	-0.301387	-0.203177	0.0569906	0.0840184	-0.0510298	-0.378907	-0.181092	-0.220461	-0.411635	-0.253749	0.823258	-0.0227352	-0.271647
-4.19882	-0.855572	0.192079	-0.593153	-0.565224	0.23155	-0.23851	0.171359	-0.525473	-0.217987	0.610627	-0.610728	-0.0942285	-0.0270462	-0.187976	-0.451842	-0.147187	0.450091	0.231217	0.604662	-0.553092	0.0153868	-0.522904	0.030888	0.474417	0.330707	0.784358	-0.653681	0.13032	0.197386	0.0325593	0.556171	0.186023	-0.189222	-0.326566	-0.127963	-0.587234	-0.300609	-0.205006	0.059237	0.0829047	-0.0511836	-0.379433	-0.182628	-0.219087	-0.412236	-0.253556	0.822474	-0.0221335	-0.271119
-4.19784	-0.857299	0.191667	-0.59366	-0.564721	0.230162	-0.238536	0.16991	-0.523801	-0.218757	0.607627	-0.612257	-0.0935317	-0.0266502	-0.188509	-0.451088	-0.147462	0.448313	0.230564	0.603743	-0.552698	0.0162427	-0.524296	0.0298706	0.476803	0.329945	0.78506	-0.65463	0.130561	0.196596	0.0325393	0.556089	0.184699	-0.189477	-0.328902	-0.129319	-0.587768	-0.299841	-0.206851	0.0614848	0.0817773	-0.051344	-0.379956	-0.184172	-0.217709	-0.412825	-0.253361	0.82167	-0.0215212	-0.270593
-4.19686	-0.85902	0.191273	-0.594166	-0.564219	0.228763	-0.238562	0.168461	-0.522125	-0.219523	0.604629	-0.613789	-0.0928167	-0.0262548	-0.189059	-0.450298	-0.147728	0.446518	0.229912	0.602816	-0.552306	0.0170784	-0.525679	0.0288536	0.479175	0.329181	0.78575	-0.655575	0.130799	0.19582	0.0325158	0.555984	0.183397	-0.18971	-0.331229	-0.130671	-0.588289	-0.299083	-0.208711	0.0637335	0.0806364	-0.0515112	-0.380476	-0.185724	-0.216328	-0.413402	-0.253163	0.820846	-0.0208982	-0.27007
-4.19587	-0.860737	0.190896	-0.594673	-0.563719	0.227352	-0.238588	0.16701	-0.520447	-0.220286	0.601635	-0.615326	-0.0920836	-0.02586	-0.189625	-0.449472	-0.147986	0.444705	0.229261	0.60188	-0.551915	0.0178938	-0.527053	0.0278369	0.481532	0.328415	0.786426	-0.656519	0.131035	0.195056	0.0324886	0.555858	0.182118	-0.18992	-0.333545	-0.132017	-0.588798	-0.298334	-0.210586	0.0659831	0.0794821	-0.0516849	-0.380993	-0.187284	-0.214943	-0.413966	-0.252963	0.820002	-0.0202645	-0.26955
[truncated: 14,440 more rows]
[truncated: 311 more columns]

## Sheet: Figure 5B Bottom
Time from infusion onset (s)	Unpaired: VTADA Activity (z-score)																																										Paired: VTADA Activity (z-score)
	CD							E1							E2							E3							E4							E5							CD
[truncated: 154 more rows]
[truncated: 41 more columns]

## Sheet: Figure 5C
Subject ID	Treatment	VTADA Response (mean z-score)
[truncated: 16 more rows]

[truncated: 1 more sheets: Figure 5D]
