# Supplementary material for: Dopamine activity encodes the changing valence of the same stimulus in conditioned taste aversion paradigms
Source: eLife. 2025 Mar 5;13:RP103260. doi: 10.7554/eLife.103260 (PMC11882140; doi:10.7554/eLife.103260)
Supplement: Figure 6—source data 1. [file elife-103260-fig6-data1.xlsx]

## Sheet: Figure 6A
Subject ID	Treatment	Sucrose Preference Score
		CD	E1	E2	E3	E4	E5
Svg048	Unpaired	NaN	0.724138	0.857143	0.941176	0.9	0.888889
Svg024	Unpaired	NaN	0.722222	0.888889	0.84	0.896552	0.846154
Svg052	Unpaired	NaN	0.888889	0.888889	0.916667	1	0.941176
Svg060	Unpaired	NaN	0.923077	1	0.95	0.958333	0.964286
Svg062	Unpaired	NaN	0.888889	0.842105	0.833333	0.941176	0.947368
Svg064	Unpaired	NaN	1	0.875	0.882353	0.857143	0.888889
Svg076	Unpaired	NaN	0.75	0.8	0.875	0.8125	0.928571
Svg047	Paired	NaN	0	0.444444	0.826087	0.789474	0.714286
Svg051	Paired	NaN	0	0.333333	0.75	1	0.833333
Svg058	Paired	NaN	0.444444	0.666667	1	0.964286	0.888889
Svg062	Paired	NaN	0.25	0	0.666667	0.857143	0.967742
Svg066	Paired	NaN	0.333333	0.428571	0.846154	0.944444	0.947368
Svg074	Paired	NaN	0.333333	0.444444	0.933333	0.894737	0.75
Svg082	Paired	NaN	0.5	0.454545	0.857143	1	0.933333
Svg088	Paired	NaN	0.25	0.47619	0.875	0.941176	0.909091

## Sheet: Figure 6B
Subject ID	Treatment	Day	VTADA Activity Response (mean z-score)	Sucrose Preference Score
Svg048	Unpaired	E1	0.469399	0.724138
Svg024	Unpaired	E1	0.088975	0.722222
Svg052	Unpaired	E1	0.031127	0.888889
Svg060	Unpaired	E1	0.817873	0.923077
Svg062	Unpaired	E1	1.13266	0.888889
Svg064	Unpaired	E1	0.422948	1
Svg076	Unpaired	E1	0.195521	0.75
Svg047	Paired	E1	-0.34224	0
Svg051	Paired	E1	-0.24105	0
Svg058	Paired	E1	0.384048	0.444444
Svg062	Paired	E1	-0.17575	0.25
Svg066	Paired	E1	-0.52169	0.333333
Svg074	Paired	E1	-0.02132	0.333333
Svg082	Paired	E1	0.06631	0.5
Svg088	Paired	E1	-0.34387	0.25
Svg048	Unpaired	E2	0.58261	0.857143
Svg024	Unpaired	E2	1.62636	0.888889
Svg052	Unpaired	E2	0.301733	0.888889
Svg060	Unpaired	E2	0.910611	1
Svg062	Unpaired	E2	1.44334	0.842105
Svg064	Unpaired	E2	0.51237	0.875
Svg076	Unpaired	E2	0.548747	0.8
Svg047	Paired	E2	-0.11961	0.444444
Svg051	Paired	E2	0.367821	0.333333
Svg058	Paired	E2	0.994059	0.666667
Svg062	Paired	E2	-0.3936	0
Svg066	Paired	E2	-0.12241	0.428571
Svg074	Paired	E2	-0.0371	0.444444
Svg082	Paired	E2	0.377246	0.454545
Svg088	Paired	E2	-0.02123	0.47619
Svg048	Unpaired	E3	0.377821	0.941176
Svg024	Unpaired	E3	1.16434	0.84
Svg052	Unpaired	E3	0.772347	0.916667
Svg060	Unpaired	E3	0.917773	0.95
Svg062	Unpaired	E3	1.07528	0.833333
Svg064	Unpaired	E3	0.382417	0.882353
Svg076	Unpaired	E3	-0.00317	0.875
Svg047	Paired	E3	0.140903	0.826087
Svg051	Paired	E3	0.747539	0.75
Svg058	Paired	E3	1.43126	1
Svg062	Paired	E3	0.192979	0.666667
Svg066	Paired	E3	0.257362	0.846154
Svg074	Paired	E3	0.076726	0.933333
Svg082	Paired	E3	0.296663	0.857143
Svg088	Paired	E3	0.139037	0.875
Svg048	Unpaired	E4	0.464163	0.9
Svg024	Unpaired	E4	1.16117	0.896552
Svg052	Unpaired	E4	0.368122	1
Svg060	Unpaired	E4	1.07049	0.958333
Svg062	Unpaired	E4	0.984554	0.941176
Svg064	Unpaired	E4	0.133683	0.857143
Svg076	Unpaired	E4	0.458388	0.8125
Svg047	Paired	E4	0.186273	0.789474
Svg051	Paired	E4	0.663839	1
Svg058	Paired	E4	1.15216	0.964286
Svg062	Paired	E4	0.767896	0.857143
Svg066	Paired	E4	0.31559	0.944444
Svg074	Paired	E4	0.354547	0.894737
Svg082	Paired	E4	0.439359	1
Svg088	Paired	E4	0.321175	0.941176
Svg048	Unpaired	E5	0.387202	0.888889
Svg024	Unpaired	E5	1.08478	0.846154
Svg052	Unpaired	E5	0.903048	0.941176
Svg060	Unpaired	E5	0.913274	0.964286
Svg062	Unpaired	E5	1.14785	0.947368
Svg064	Unpaired	E5	0.619442	0.888889
Svg076	Unpaired	E5	0.247782	0.928571
Svg047	Paired	E5	0.440132	0.714286
Svg051	Paired	E5	0.746454	0.833333
Svg058	Paired	E5	0.955654	0.888889
Svg062	Paired	E5	0.965972	0.967742
Svg066	Paired	E5	0.225681	0.947368
Svg074	Paired	E5	-0.16369	0.75
Svg082	Paired	E5	0.303798	0.933333
Svg088	Paired	E5	0.284541	0.909091
