# Supplementary material for: Dopamine activity encodes the changing valence of the same stimulus in conditioned taste aversion paradigms
Source: eLife. 2025 Mar 5;13:RP103260. doi: 10.7554/eLife.103260 (PMC11882140; doi:10.7554/eLife.103260)
Supplement: Figure 7—source data 1. [file elife-103260-fig7-data1.xlsx]

## Sheet: Figure 7B Top
Time from infusion onset (s)	Unpaired: Conditioning Day: Dopamine Release to Sucrose infusion (z-score, averaged across subjects)																														Unpaired: Test Day: Dopamine Release to Sucrose infusion (z-score, averaged across subjects)
	Trial																														Trial
	1	2	3	4	5	6	7	8	9	10	11	12	13	14	15	16	17	18	19	20	21	22	23	24	25	26	27	28	29	30	1	2	3	4	5	6	7	8	9	10	11	12	13	14	15	16	17	18	19
-5	1.23602	-0.696949	-0.238607	0.198006	-0.630049	0.431523	-0.209262	-0.768333	-0.0424796	0.046507	0.865139	-0.151965	0.0554313	-0.876724	-0.221445	-0.0850286	-0.345106	-0.417065	-0.518389	-0.337962	0.432163	-0.451475	-0.536966	0.215754	-0.028823	-0.229199	-0.117242	-0.0764203	-0.188112	-0.340586	-0.214233	-0.153416	0.967026	-0.657077	-0.426816	-0.530395	0.930046	-0.580191	-0.110121	-0.400718	-0.0983541	-0.750852	-0.317009	-0.00408404	-0.349281	-0.0852886	-0.680167	-0.46961	-0.410375
-4.99902	1.23657	-0.697432	-0.238126	0.198714	-0.630168	0.433354	-0.211367	-0.767879	-0.0407787	0.0471217	0.866605	-0.154546	0.0552257	-0.876768	-0.222391	-0.0848183	-0.344526	-0.417437	-0.518433	-0.337683	0.431145	-0.451567	-0.538471	0.215067	-0.030824	-0.228247	-0.11845	-0.0769592	-0.187159	-0.340975	-0.216511	-0.154924	0.967097	-0.65742	-0.42681	-0.530669	0.931973	-0.579538	-0.11166	-0.400556	-0.0987821	-0.751919	-0.316437	-0.00446418	-0.347799	-0.0866643	-0.679781	-0.468794	-0.408413
-4.99803	1.23716	-0.697908	-0.237658	0.199417	-0.630281	0.435195	-0.213453	-0.767418	-0.03908	0.0477423	0.868031	-0.157115	0.0550397	-0.876807	-0.223349	-0.0846112	-0.34394	-0.417806	-0.51847	-0.337388	0.430124	-0.451649	-0.539978	0.214374	-0.03283	-0.227306	-0.119665	-0.0775044	-0.186217	-0.341372	-0.218773	-0.156407	0.967173	-0.657756	-0.426803	-0.53095	0.933901	-0.578859	-0.113206	-0.400399	-0.0992253	-0.752965	-0.315871	-0.00484197	-0.346304	-0.0880484	-0.679389	-0.467974	-0.40644
-4.99705	1.23779	-0.698377	-0.237202	0.200115	-0.63039	0.437045	-0.215519	-0.766949	-0.0373837	0.048369	0.869418	-0.159671	0.0548735	-0.876842	-0.22432	-0.0844072	-0.343349	-0.418171	-0.518502	-0.337078	0.4291	-0.451721	-0.541487	0.213677	-0.0348409	-0.226375	-0.120887	-0.0780557	-0.185288	-0.341776	-0.221019	-0.157866	0.967253	-0.658085	-0.426796	-0.53124	0.935829	-0.578153	-0.11476	-0.400246	-0.0996837	-0.75399	-0.315309	-0.00521745	-0.344796	-0.0894405	-0.678991	-0.467151	-0.404457
-4.99607	1.23847	-0.69884	-0.236759	0.200807	-0.630493	0.438903	-0.217567	-0.766473	-0.0356898	0.049002	0.870765	-0.162215	0.0547273	-0.876871	-0.225304	-0.0842065	-0.342753	-0.418534	-0.518527	-0.336754	0.428073	-0.451784	-0.542998	0.212974	-0.0368565	-0.225456	-0.122115	-0.0786131	-0.18437	-0.342187	-0.223248	-0.159301	0.967338	-0.658407	-0.426788	-0.531537	0.937757	-0.57742	-0.11632	-0.400098	-0.100157	-0.754993	-0.314753	-0.00559064	-0.343276	-0.0908407	-0.678588	-0.466325	-0.402463
-4.99508	1.23919	-0.699296	-0.236328	0.201495	-0.630591	0.440771	-0.219595	-0.765989	-0.0339981	0.0496415	0.872074	-0.164746	0.0546012	-0.876896	-0.2263	-0.0840089	-0.342151	-0.418894	-0.518546	-0.336415	0.427043	-0.451836	-0.54451	0.212267	-0.0388768	-0.224548	-0.12335	-0.0791768	-0.183464	-0.342605	-0.225461	-0.160713	0.967428	-0.658723	-0.42678	-0.531843	0.939685	-0.576662	-0.117886	-0.399956	-0.100646	-0.755974	-0.314202	-0.00596157	-0.341743	-0.0922485	-0.678178	-0.465495	-0.400458
-4.9941	1.23995	-0.699744	-0.235909	0.202176	-0.630683	0.442647	-0.221603	-0.765497	-0.0323088	0.0502877	0.873343	-0.167263	0.0544956	-0.876916	-0.227308	-0.0838145	-0.341544	-0.419251	-0.518559	-0.336062	0.42601	-0.451879	-0.546024	0.211555	-0.0409016	-0.223651	-0.124592	-0.0797467	-0.18257	-0.34303	-0.227657	-0.1621	0.967523	-0.659032	-0.42677	-0.532157	0.941614	-0.575877	-0.11946	-0.399818	-0.10115	-0.756935	-0.313656	-0.00633026	-0.340199	-0.093664	-0.677762	-0.464663	-0.398443
-4.99312	1.24076	-0.700186	-0.235502	0.202852	-0.630771	0.444532	-0.223592	-0.764997	-0.0306218	0.0509407	0.874573	-0.169767	0.0544105	-0.87693	-0.228328	-0.0836234	-0.340932	-0.419605	-0.518565	-0.335694	0.424974	-0.451911	-0.547539	0.210837	-0.0429308	-0.222766	-0.125841	-0.0803229	-0.181688	-0.343462	-0.229835	-0.163464	0.967622	-0.659336	-0.42676	-0.532479	0.943543	-0.575067	-0.121039	-0.399685	-0.101669	-0.757874	-0.313114	-0.00669676	-0.338641	-0.0950868	-0.677339	-0.463828	-0.396418
-4.99214	1.24161	-0.700621	-0.235106	0.203522	-0.630853	0.446426	-0.225561	-0.76449	-0.0289371	0.0516009	0.875764	-0.172257	0.0543463	-0.87694	-0.22936	-0.0834355	-0.340314	-0.419955	-0.518565	-0.335313	0.423935	-0.451933	-0.549056	0.210115	-0.0449643	-0.221892	-0.127097	-0.0809052	-0.180819	-0.343901	-0.231996	-0.164804	0.967725	-0.659633	-0.426748	-0.532809	0.945472	-0.57423	-0.122624	-0.399557	-0.102203	-0.758791	-0.312578	-0.00706108	-0.337072	-0.0965168	-0.676911	-0.462989	-0.394382
-4.99115	1.2425	-0.70105	-0.234723	0.204186	-0.630929	0.448327	-0.227509	-0.763975	-0.0272548	0.0522683	0.876916	-0.174733	0.0543031	-0.876943	-0.230404	-0.0832509	-0.339691	-0.420303	-0.518559	-0.334918	0.422893	-0.451945	-0.550574	0.209388	-0.047002	-0.221029	-0.12836	-0.0814938	-0.179962	-0.344347	-0.23414	-0.16612	0.967834	-0.659924	-0.426736	-0.533148	0.947401	-0.573368	-0.124215	-0.399434	-0.102752	-0.759688	-0.312047	-0.00742327	-0.33549	-0.0979538	-0.676477	-0.462148	-0.392337
-4.99017	1.24344	-0.701471	-0.234351	0.204843	-0.631001	0.450238	-0.229437	-0.763453	-0.0255747	0.0529431	0.878029	-0.177195	0.054281	-0.876941	-0.231459	-0.0830696	-0.339062	-0.420647	-0.518546	-0.334509	0.421849	-0.451947	-0.552094	0.208656	-0.0490438	-0.220178	-0.129629	-0.0820887	-0.179117	-0.344799	-0.236266	-0.167412	0.967946	-0.660208	-0.426723	-0.533495	0.94933	-0.572479	-0.125811	-0.399316	-0.103316	-0.760563	-0.311521	-0.00778334	-0.333896	-0.0993976	-0.676036	-0.461304	-0.390282
-4.98919	1.24443	-0.701885	-0.233991	0.205495	-0.631067	0.452156	-0.231344	-0.762922	-0.023897	0.0536256	0.879103	-0.179643	0.0542804	-0.876934	-0.232525	-0.0828915	-0.338428	-0.420989	-0.518526	-0.334086	0.420802	-0.451938	-0.553614	0.207919	-0.0510896	-0.219338	-0.130906	-0.0826898	-0.178285	-0.345257	-0.238374	-0.16868	0.968064	-0.660488	-0.426708	-0.533851	0.951259	-0.571565	-0.127413	-0.399203	-0.103895	-0.761416	-0.311	-0.00814135	-0.33229	-0.100848	-0.675589	-0.460457	-0.388217
-4.9882	1.24545	-0.702293	-0.233642	0.20614	-0.631128	0.454083	-0.233231	-0.762384	-0.0222215	0.0543159	0.880138	-0.182075	0.0543014	-0.876921	-0.233602	-0.0827168	-0.337789	-0.421327	-0.5185	-0.333651	0.419752	-0.451919	-0.555135	0.207178	-0.0531392	-0.218511	-0.132189	-0.0832972	-0.177466	-0.345722	-0.240464	-0.169925	0.968186	-0.660761	-0.426693	-0.534215	0.953189	-0.570626	-0.12902	-0.399094	-0.104488	-0.762249	-0.310485	-0.00849731	-0.330672	-0.102305	-0.675137	-0.459607	-0.386143
-4.98722	1.24652	-0.702694	-0.233304	0.206778	-0.631184	0.456017	-0.235096	-0.761838	-0.0205483	0.0550143	0.881134	-0.184492	0.0543441	-0.876901	-0.234689	-0.0825453	-0.337145	-0.421661	-0.518468	-0.333202	0.4187	-0.451889	-0.556657	0.206432	-0.0551925	-0.217695	-0.133478	-0.0839109	-0.17666	-0.346193	-0.242535	-0.171147	0.968312	-0.661028	-0.426677	-0.534589	0.955118	-0.569661	-0.130632	-0.398991	-0.105097	-0.76306	-0.309974	-0.00885127	-0.329042	-0.103768	-0.674677	-0.458755	-0.38406
-4.98624	1.24764	-0.703088	-0.232978	0.20741	-0.631234	0.45796	-0.23694	-0.761285	-0.0188775	0.0557208	0.882091	-0.186894	0.0544088	-0.876876	-0.235787	-0.0823773	-0.336496	-0.421993	-0.518429	-0.33274	0.417646	-0.451849	-0.55818	0.205681	-0.0572494	-0.216891	-0.134775	-0.0845309	-0.175867	-0.34667	-0.244588	-0.172344	0.968443	-0.66129	-0.426659	-0.534971	0.957046	-0.56867	-0.132248	-0.398893	-0.10572	-0.76385	-0.309468	-0.00920326	-0.3274	-0.105237	-0.674212	-0.4579	-0.381967
-4.98525	1.2488	-0.703476	-0.232662	0.208035	-0.631279	0.45991	-0.238763	-0.760724	-0.0172088	0.0564358	0.88301	-0.189281	0.0544957	-0.876844	-0.236896	-0.0822125	-0.335841	-0.422321	-0.518383	-0.332266	0.416589	-0.451798	-0.559703	0.204925	-0.0593098	-0.216098	-0.136078	-0.0851572	-0.175087	-0.347153	-0.246623	-0.173519	0.968579	-0.661547	-0.42664	-0.535361	0.958975	-0.567655	-0.133869	-0.398799	-0.106358	-0.764618	-0.308968	-0.00955331	-0.325746	-0.106712	-0.67374	-0.457043	-0.379866
-4.98427	1.25	-0.703856	-0.232357	0.208652	-0.631319	0.461867	-0.240565	-0.760155	-0.0155425	0.0571593	0.88389	-0.191652	0.0546049	-0.876806	-0.238014	-0.0820511	-0.335181	-0.422646	-0.518331	-0.33178	0.41553	-0.451736	-0.561227	0.204165	-0.0613736	-0.215318	-0.137388	-0.0857898	-0.174321	-0.347642	-0.248638	-0.174669	0.968718	-0.661798	-0.42662	-0.535761	0.960904	-0.566614	-0.135495	-0.398711	-0.107011	-0.765366	-0.308472	-0.00990146	-0.324081	-0.108192	-0.673262	-0.456183	-0.377755
-4.98329	1.25124	-0.70423	-0.232063	0.209263	-0.631354	0.463833	-0.242344	-0.759578	-0.0138784	0.0578917	0.884732	-0.194006	0.0547367	-0.876762	-0.239142	-0.0818931	-0.334516	-0.422967	-0.518273	-0.331281	0.414469	-0.451664	-0.562751	0.203401	-0.0634405	-0.21455	-0.138705	-0.0864287	-0.173567	-0.348137	-0.250635	-0.175797	0.968863	-0.662044	-0.426599	-0.53617	0.962832	-0.565548	-0.137124	-0.398627	-0.107678	-0.766092	-0.307982	-0.0102478	-0.322404	-0.109678	-0.672778	-0.455321	-0.375636
-4.98231	1.25253	-0.704597	-0.23178	0.209867	-0.631384	0.465805	-0.244102	-0.758994	-0.0122165	0.058633	0.885535	-0.196345	0.0548911	-0.876711	-0.24028	-0.0817385	-0.333846	-0.423285	-0.518207	-0.33077	0.413405	-0.451581	-0.564275	0.202631	-0.0655106	-0.213794	-0.140028	-0.0870739	-0.172828	-0.348637	-0.252613	-0.176901	0.969012	-0.662285	-0.426576	-0.536588	0.96476	-0.564457	-0.138757	-0.398549	-0.10836	-0.766797	-0.307497	-0.0105922	-0.320715	-0.111169	-0.672288	-0.454457	-0.373509
-4.98132	1.25387	-0.704957	-0.231507	0.210463	-0.631408	0.467785	-0.245838	-0.758402	-0.0105569	0.0593834	0.8863	-0.198666	0.0550684	-0.876653	-0.241428	-0.0815873	-0.333171	-0.4236	-0.518135	-0.330247	0.41234	-0.451488	-0.5658	0.201858	-0.0675837	-0.213051	-0.141358	-0.0877255	-0.172102	-0.349143	-0.254571	-0.177982	0.969165	-0.662521	-0.426552	-0.537015	0.966688	-0.563342	-0.140394	-0.398475	-0.109056	-0.767482	-0.307017	-0.0109349	-0.319015	-0.112666	-0.671791	-0.45359	-0.371373
-4.98034	1.25524	-0.70531	-0.231245	0.211051	-0.631428	0.469772	-0.247551	-0.757803	-0.00889943	0.0601432	0.887027	-0.200971	0.0552687	-0.876588	-0.242584	-0.0814394	-0.332491	-0.423911	-0.518057	-0.329712	0.411273	-0.451383	-0.567325	0.20108	-0.0696595	-0.212319	-0.142694	-0.0883834	-0.17139	-0.349655	-0.256509	-0.179039	0.969322	-0.662751	-0.426527	-0.537451	0.968615	-0.562201	-0.142034	-0.398407	-0.109767	-0.768145	-0.306542	-0.0112758	-0.317304	-0.114167	-0.671288	-0.452721	-0.369229
-4.97936	1.25666	-0.705657	-0.230992	0.211632	-0.631442	0.471766	-0.249242	-0.757195	-0.00724421	0.0609125	0.887715	-0.203259	0.0554922	-0.876517	-0.24375	-0.081295	-0.331806	-0.424219	-0.517972	-0.329166	0.410203	-0.451268	-0.568849	0.200297	-0.0717381	-0.211601	-0.144037	-0.0890477	-0.170691	-0.350171	-0.258428	-0.180074	0.969484	-0.662977	-0.4265	-0.537897	0.970542	-0.561037	-0.143678	-0.398343	-0.110492	-0.768787	-0.306072	-0.0116151	-0.315581	-0.115672	-0.670778	-0.45185	-0.367077
-4.97837	1.25813	-0.705997	-0.23075	0.212205	-0.631452	0.473766	-0.25091	-0.75658	-0.00559118	0.0616915	0.888366	-0.20553	0.0557391	-0.876438	-0.244924	-0.0811541	-0.331116	-0.424523	-0.51788	-0.328608	0.409132	-0.451141	-0.570373	0.19951	-0.0738193	-0.210894	-0.145387	-0.0897183	-0.170007	-0.350693	-0.260328	-0.181086	0.96965	-0.663198	-0.426472	-0.538352	0.972468	-0.559848	-0.145324	-0.398284	-0.111231	-0.769409	-0.305607	-0.0119526	-0.313847	-0.117183	-0.670262	-0.450977	-0.364917
-4.97739	1.25963	-0.70633	-0.230518	0.21277	-0.631456	0.475774	-0.252555	-0.755958	-0.00394032	0.0624804	0.888978	-0.207783	0.0560096	-0.876353	-0.246107	-0.0810166	-0.330421	-0.424823	-0.517782	-0.32804	0.408059	-0.451004	-0.571897	0.198719	-0.0759029	-0.2102	-0.146743	-0.0903953	-0.169337	-0.351219	-0.262207	-0.182074	0.96982	-0.663415	-0.426442	-0.538816	0.974394	-0.558634	-0.146974	-0.398231	-0.111985	-0.770009	-0.305147	-0.0122886	-0.312102	-0.118697	-0.66974	-0.450102	-0.36275
-4.97641	1.26118	-0.706656	-0.230295	0.213327	-0.631455	0.477788	-0.254178	-0.755328	-0.00229163	0.0632793	0.889553	-0.210019	0.0563037	-0.87626	-0.247298	-0.0808825	-0.329721	-0.42512	-0.517676	-0.32746	0.406985	-0.450855	-0.573421	0.197923	-0.0779889	-0.209519	-0.148105	-0.0910786	-0.168681	-0.351751	-0.264066	-0.18304	0.969994	-0.663627	-0.42641	-0.53929	0.976319	-0.557397	-0.148625	-0.398182	-0.112752	-0.770589	-0.304693	-0.0126229	-0.310346	-0.120215	-0.669211	-0.449225	-0.360575
-4.97542	1.26278	-0.706976	-0.230082	0.213876	-0.63145	0.479808	-0.255777	-0.75469	-0.000645087	0.0640885	0.89009	-0.212236	0.0566217	-0.876159	-0.248497	-0.0807519	-0.329016	-0.425414	-0.517565	-0.32687	0.405909	-0.450695	-0.574943	0.197123	-0.080077	-0.20885	-0.149474	-0.0917683	-0.168039	-0.352287	-0.265905	-0.183983	0.970173	-0.663834	-0.426377	-0.539773	0.978244	-0.556135	-0.150279	-0.398138	-0.113534	-0.771148	-0.304244	-0.0129557	-0.308578	-0.121738	-0.668676	-0.448346	-0.358392
-4.97444	1.26441	-0.707289	-0.229879	0.214416	-0.631439	0.481834	-0.257353	-0.754045	0.000999328	0.0649082	0.890589	-0.214436	0.0569637	-0.876051	-0.249704	-0.0806248	-0.328307	-0.425703	-0.517446	-0.326269	0.404831	-0.450524	-0.576466	0.196319	-0.0821672	-0.208194	-0.15085	-0.0924644	-0.167412	-0.352828	-0.267723	-0.184903	0.970355	-0.664037	-0.426343	-0.540266	0.980168	-0.55485	-0.151935	-0.398099	-0.11433	-0.771686	-0.303799	-0.013287	-0.3068	-0.123264	-0.668134	-0.447465	-0.356203
-4.97346	1.26609	-0.707595	-0.229685	0.214948	-0.631423	0.483867	-0.258906	-0.753392	0.00264163	0.0657384	0.891051	-0.216617	0.0573298	-0.875936	-0.250918	-0.0805012	-0.327592	-0.42599	-0.517321	-0.325658	0.403752	-0.450342	-0.577987	0.19551	-0.0842593	-0.20755	-0.152231	-0.0931669	-0.1668	-0.353374	-0.269521	-0.185801	0.970542	-0.664236	-0.426306	-0.540768	0.982092	-0.553541	-0.153593	-0.398065	-0.11514	-0.772204	-0.30336	-0.0136169	-0.305012	-0.124793	-0.667586	-0.446583	-0.354006
-4.97247	1.26781	-0.707895	-0.2295	0.215471	-0.631403	0.485906	-0.260435	-0.752731	0.00428183	0.0665794	0.891476	-0.218779	0.0577202	-0.875812	-0.25214	-0.0803811	-0.326873	-0.426272	-0.51719	-0.325037	0.402671	-0.450149	-0.579508	0.194698	-0.0863532	-0.20692	-0.153619	-0.0938757	-0.166202	-0.353924	-0.271298	-0.186676	0.970733	-0.66443	-0.426268	-0.54128	0.984014	-0.552208	-0.155253	-0.398036	-0.115964	-0.772701	-0.302926	-0.0139453	-0.303212	-0.126326	-0.667032	-0.445699	-0.351803
-4.97149	1.26958	-0.708187	-0.229324	0.215986	-0.631378	0.487951	-0.26194	-0.752064	0.00591995	0.0674313	0.891863	-0.220922	0.0581351	-0.875681	-0.253369	-0.0802645	-0.326149	-0.426551	-0.517051	-0.324405	0.40159	-0.449944	-0.581027	0.193881	-0.0884487	-0.206302	-0.155013	-0.0945909	-0.165619	-0.354478	-0.273054	-0.187529	0.970927	-0.664621	-0.426229	-0.541802	0.985936	-0.550852	-0.156914	-0.398012	-0.116802	-0.773178	-0.302497	-0.0142723	-0.301402	-0.127861	-0.666471	-0.444814	-0.349593
-4.97051	1.27138	-0.708473	-0.229157	0.216491	-0.631348	0.490001	-0.263422	-0.751388	0.00755601	0.0682944	0.892214	-0.223047	0.0585745	-0.875542	-0.254605	-0.0801514	-0.32542	-0.426825	-0.516907	-0.323764	0.400507	-0.449728	-0.582546	0.19306	-0.0905457	-0.205697	-0.156414	-0.0953126	-0.165051	-0.355037	-0.274789	-0.188359	0.971126	-0.664807	-0.426187	-0.542334	0.987858	-0.549473	-0.158577	-0.397993	-0.117653	-0.773634	-0.302074	-0.014598	-0.299581	-0.1294	-0.665904	-0.443927	-0.347377
-4.96953	1.27323	-0.708753	-0.228999	0.216988	-0.631313	0.492057	-0.264879	-0.750705	0.00919003	0.0691688	0.892527	-0.225152	0.0590386	-0.875395	-0.255848	-0.0800418	-0.324687	-0.427096	-0.516755	-0.323114	0.399423	-0.449501	-0.584063	0.192235	-0.092644	-0.205105	-0.15782	-0.0960406	-0.164498	-0.355599	-0.276503	-0.189167	0.971328	-0.66499	-0.426144	-0.542875	0.989778	-0.548071	-0.16024	-0.397978	-0.118519	-0.77407	-0.301655	-0.0149225	-0.297751	-0.130941	-0.66533	-0.443039	-0.345155
-4.96854	1.27512	-0.709026	-0.22885	0.217475	-0.631273	0.494118	-0.266312	-0.750015	0.010822	0.0700547	0.892804	-0.227238	0.0595276	-0.87524	-0.257097	-0.0799358	-0.323949	-0.427364	-0.516597	-0.322454	0.398338	-0.449262	-0.585579	0.191406	-0.0947436	-0.204527	-0.159233	-0.096775	-0.16396	-0.356165	-0.278195	-0.189953	0.971534	-0.665169	-0.426099	-0.543427	0.991698	-0.546645	-0.161904	-0.397969	-0.119398	-0.774486	-0.301242	-0.0152457	-0.295909	-0.132485	-0.66475	-0.442149	-0.342926
-4.96756	1.27706	-0.709292	-0.228709	0.217953	-0.631229	0.496184	-0.267722	-0.749317	0.012452	0.0709522	0.893044	-0.229304	0.0600416	-0.875076	-0.258352	-0.0798333	-0.323207	-0.427627	-0.516432	-0.321785	0.397251	-0.449011	-0.587093	0.190574	-0.0968442	-0.203961	-0.160652	-0.0975158	-0.163438	-0.356736	-0.279867	-0.190717	0.971744	-0.665344	-0.426051	-0.543988	0.993616	-0.545197	-0.163569	-0.397965	-0.12029	-0.774882	-0.300834	-0.0155677	-0.294058	-0.134031	-0.664163	-0.441258	-0.340692
-4.96658	1.27903	-0.709551	-0.228576	0.218422	-0.63118	0.498256	-0.269106	-0.748612	0.01408	0.0718615	0.893247	-0.23135	0.0605806	-0.874904	-0.259613	-0.0797344	-0.32246	-0.427887	-0.516261	-0.321107	0.396164	-0.448749	-0.588606	0.189737	-0.0989458	-0.203408	-0.162076	-0.098263	-0.162931	-0.35731	-0.281516	-0.191459	0.971957	-0.665515	-0.426002	-0.544559	0.995534	-0.543726	-0.165233	-0.397965	-0.121196	-0.775257	-0.300431	-0.0158885	-0.292197	-0.135578	-0.66357	-0.440366	-0.338451
-4.96559	1.28105	-0.709804	-0.228452	0.218882	-0.631126	0.500333	-0.270466	-0.7479	0.0157061	0.0727828	0.893414	-0.233376	0.0611449	-0.874723	-0.26088	-0.0796391	-0.321709	-0.428143	-0.516083	-0.32042	0.395077	-0.448476	-0.590117	0.188896	-0.101048	-0.202868	-0.163507	-0.0990167	-0.162439	-0.357887	-0.283144	-0.192179	0.972174	-0.665683	-0.425951	-0.545141	0.99745	-0.542233	-0.166898	-0.39797	-0.122116	-0.775613	-0.300033	-0.0162083	-0.290325	-0.137128	-0.66297	-0.439473	-0.336206
-4.96461	1.28311	-0.71005	-0.228335	0.219331	-0.631068	0.502414	-0.271801	-0.74718	0.0173302	0.0737162	0.893545	-0.235382	0.0617345	-0.874534	-0.262152	-0.0795473	-0.320953	-0.428394	-0.515898	-0.319724	0.393988	-0.448191	-0.591627	0.188051	-0.103151	-0.202342	-0.164943	-0.0997767	-0.161963	-0.358468	-0.284751	-0.192877	0.972394	-0.665848	-0.425898	-0.545732	0.999366	-0.540718	-0.168563	-0.397981	-0.123048	-0.775948	-0.29964	-0.016527	-0.288444	-0.13868	-0.662364	-0.438579	-0.333955
-4.96363	1.28521	-0.710289	-0.228227	0.219771	-0.631005	0.5045	-0.273112	-0.746453	0.0189523	0.074662	0.89364	-0.237368	0.0623496	-0.874336	-0.263429	-0.0794592	-0.320193	-0.428642	-0.515707	-0.319021	0.392899	-0.447894	-0.593134	0.187203	-0.105255	-0.201829	-0.166386	-0.100543	-0.161503	-0.359052	-0.286335	-0.193553	0.972618	-0.666009	-0.425843	-0.546334	1.00128	-0.53918	-0.170228	-0.397996	-0.123994	-0.776264	-0.299252	-0.0168447	-0.286553	-0.140233	-0.661751	-0.437684	-0.331698
-4.96264	1.28735	-0.710522	-0.228126	0.220201	-0.630938	0.506591	-0.274398	-0.745719	0.0205726	0.0756202	0.8937	-0.239333	0.0629902	-0.87413	-0.264712	-0.0793746	-0.319428	-0.428886	-0.51551	-0.318309	0.391809	-0.447585	-0.59464	0.18635	-0.107359	-0.201329	-0.167834	-0.101316	-0.161058	-0.359639	-0.287897	-0.194208	0.972845	-0.666167	-0.425786	-0.546946	1.00319	-0.537621	-0.171892	-0.398016	-0.124954	-0.776559	-0.29887	-0.0171614	-0.284653	-0.141787	-0.661132	-0.436788	-0.329437
-4.96166	1.28953	-0.710748	-0.228033	0.220621	-0.630866	0.508686	-0.275658	-0.744978	0.022191	0.0765911	0.893723	-0.241276	0.0636565	-0.873914	-0.265999	-0.0792936	-0.31866	-0.429126	-0.515306	-0.317588	0.390719	-0.447265	-0.596143	0.185494	-0.109463	-0.200842	-0.169287	-0.102095	-0.160629	-0.36023	-0.289438	-0.194842	0.973076	-0.666322	-0.425727	-0.547568	1.00511	-0.53604	-0.173555	-0.398041	-0.125926	-0.776836	-0.298493	-0.0174772	-0.282743	-0.143342	-0.660506	-0.435892	-0.327171
-4.96068	1.29175	-0.710967	-0.227947	0.221031	-0.63079	0.510785	-0.276893	-0.744229	0.0238076	0.0775747	0.893711	-0.243199	0.0643485	-0.87369	-0.267291	-0.0792163	-0.317887	-0.429362	-0.515095	-0.316861	0.389628	-0.446933	-0.597644	0.184634	-0.111567	-0.200369	-0.170747	-0.102881	-0.160217	-0.360823	-0.290956	-0.195454	0.97331	-0.666474	-0.425665	-0.5482	1.00702	-0.534437	-0.175217	-0.39807	-0.126911	-0.777092	-0.298121	-0.0177921	-0.280823	-0.144898	-0.659874	-0.434994	-0.3249
-4.9597	1.29402	-0.71118	-0.227869	0.22143	-0.63071	0.512888	-0.278104	-0.743473	0.0254223	0.0785714	0.893664	-0.245101	0.0650664	-0.873456	-0.268586	-0.0791425	-0.317109	-0.429594	-0.514879	-0.316125	0.388537	-0.446589	-0.599143	0.183771	-0.113671	-0.199909	-0.172212	-0.103673	-0.15982	-0.361419	-0.292451	-0.196045	0.973547	-0.666622	-0.425602	-0.548842	1.00893	-0.532813	-0.176877	-0.398105	-0.12791	-0.777329	-0.297754	-0.0181063	-0.278894	-0.146455	-0.659235	-0.434096	-0.322625
-4.95871	1.29632	-0.711386	-0.227798	0.22182	-0.630625	0.514995	-0.279288	-0.742711	0.0270352	0.0795811	0.893582	-0.246981	0.0658103	-0.873213	-0.269886	-0.0790724	-0.316328	-0.429821	-0.514655	-0.315382	0.387445	-0.446233	-0.600639	0.182904	-0.115774	-0.199463	-0.173682	-0.104471	-0.15944	-0.362018	-0.293924	-0.196615	0.973787	-0.666768	-0.425536	-0.549495	1.01083	-0.531167	-0.178537	-0.398144	-0.128921	-0.777547	-0.297393	-0.0184196	-0.276957	-0.148012	-0.65859	-0.433198	-0.320346
-4.95773	1.29867	-0.711586	-0.227734	0.222198	-0.630536	0.517105	-0.280447	-0.741941	0.0286464	0.0806041	0.893464	-0.24884	0.0665802	-0.872961	-0.27119	-0.079006	-0.315543	-0.430045	-0.514426	-0.314632	0.386353	-0.445866	-0.602133	0.182033	-0.117878	-0.19903	-0.175158	-0.105276	-0.159076	-0.362619	-0.295375	-0.197165	0.97403	-0.666911	-0.425468	-0.550158	1.01274	-0.529501	-0.180194	-0.398188	-0.129945	-0.777746	-0.297036	-0.0187323	-0.27501	-0.149569	-0.657938	-0.432299	-0.318062
-4.95675	1.30105	-0.711779	-0.227676	0.222566	-0.630443	0.51922	-0.281581	-0.741164	0.0302557	0.0816406	0.893312	-0.250677	0.0673763	-0.8727	-0.272497	-0.0789431	-0.314753	-0.430264	-0.51419	-0.313875	0.385262	-0.445486	-0.603624	0.181159	-0.119981	-0.198611	-0.176639	-0.106088	-0.158728	-0.363223	-0.296803	-0.197693	0.974276	-0.667052	-0.425397	-0.550832	1.01465	-0.527813	-0.18185	-0.398237	-0.130982	-0.777925	-0.296685	-0.0190442	-0.273054	-0.151127	-0.65728	-0.4314	-0.315775
-4.95576	1.30347	-0.711965	-0.227626	0.222924	-0.630346	0.521337	-0.282689	-0.740381	0.0318634	0.0826906	0.893125	-0.252492	0.0681986	-0.872429	-0.273808	-0.078884	-0.31396	-0.43048	-0.513947	-0.313111	0.38417	-0.445094	-0.605112	0.180281	-0.122083	-0.198205	-0.178126	-0.106905	-0.158397	-0.363829	-0.298208	-0.1982	0.974525	-0.667189	-0.425325	-0.551515	1.01655	-0.526105	-0.183503	-0.398291	-0.132031	-0.778085	-0.296339	-0.0193555	-0.271089	-0.152684	-0.656615	-0.4305	-0.313484
-4.95478	1.30594	-0.712145	-0.227581	0.22327	-0.630244	0.523458	-0.283771	-0.73959	0.0334693	0.0837544	0.892904	-0.254286	0.0690472	-0.872148	-0.275121	-0.0788285	-0.313162	-0.430691	-0.513699	-0.31234	0.383078	-0.444691	-0.606597	0.179399	-0.124184	-0.197812	-0.179617	-0.107729	-0.158082	-0.364437	-0.299591	-0.198687	0.974777	-0.667325	-0.425249	-0.55221	1.01845	-0.524377	-0.185154	-0.39835	-0.133093	-0.778226	-0.295998	-0.0196663	-0.269116	-0.154241	-0.655944	-0.429601	-0.311189
-4.9538	1.30844	-0.712319	-0.227544	0.223606	-0.630139	0.525582	-0.284827	-0.738793	0.0350736	0.084832	0.892649	-0.256056	0.0699222	-0.871858	-0.276437	-0.0787766	-0.312361	-0.430898	-0.513444	-0.311563	0.381986	-0.444275	-0.608079	0.178514	-0.126284	-0.197433	-0.181114	-0.10856	-0.157784	-0.365047	-0.30095	-0.199153	0.975032	-0.667457	-0.425172	-0.552915	1.02035	-0.522628	-0.186802	-0.398413	-0.134167	-0.778348	-0.295663	-0.0199765	-0.267134	-0.155798	-0.655266	-0.428701	-0.308891
-4.95281	1.31098	-0.712485	-0.227512	0.223931	-0.630029	0.527709	-0.285857	-0.737988	0.0366762	0.0859237	0.89236	-0.257805	0.0708236	-0.871558	-0.277756	-0.0787285	-0.311556	-0.431101	-0.513183	-0.31078	0.380895	-0.443848	-0.609559	0.177626	-0.128383	-0.197068	-0.182616	-0.109397	-0.157503	-0.36566	-0.302287	-0.199599	0.975289	-0.667588	-0.425092	-0.55363	1.02225	-0.520859	-0.188448	-0.398481	-0.135253	-0.778452	-0.295332	-0.0202863	-0.265144	-0.157354	-0.654582	-0.427801	-0.30659
-4.95183	1.31356	-0.712645	-0.227486	0.224244	-0.629916	0.529838	-0.286862	-0.737178	0.0382772	0.0870295	0.892037	-0.259531	0.0717515	-0.871249	-0.279077	-0.078684	-0.310747	-0.431299	-0.512916	-0.30999	0.379804	-0.443408	-0.611034	0.176734	-0.130481	-0.196716	-0.184122	-0.11024	-0.157239	-0.366274	-0.3036	-0.200025	0.975548	-0.667716	-0.42501	-0.554356	1.02415	-0.519071	-0.19009	-0.398554	-0.136352	-0.778537	-0.295007	-0.0205957	-0.263146	-0.158909	-0.653892	-0.426902	-0.304286
-4.95085	1.31618	-0.712799	-0.227467	0.224546	-0.629798	0.53197	-0.28784	-0.73636	0.0398766	0.0881496	0.89168	-0.261234	0.072706	-0.870929	-0.2804	-0.0786432	-0.309935	-0.431494	-0.512642	-0.309194	0.378713	-0.442956	-0.612507	0.175839	-0.132577	-0.196378	-0.185634	-0.11109	-0.156992	-0.366889	-0.304891	-0.200431	0.975811	-0.667841	-0.424925	-0.555092	1.02605	-0.517262	-0.191729	-0.398631	-0.137463	-0.778603	-0.294687	-0.0209046	-0.261139	-0.160462	-0.653194	-0.426002	-0.30198
-4.94986	1.31883	-0.712946	-0.227453	0.224837	-0.629677	0.534105	-0.288792	-0.735536	0.0414744	0.0892842	0.891291	-0.262914	0.0736872	-0.8706	-0.281724	-0.0786062	-0.309118	-0.431684	-0.512363	-0.308393	0.377622	-0.442492	-0.613976	0.17494	-0.134672	-0.196054	-0.18715	-0.111946	-0.156762	-0.367506	-0.306158	-0.200816	0.976075	-0.667965	-0.424837	-0.555839	1.02794	-0.515434	-0.193365	-0.398714	-0.138586	-0.778651	-0.294373	-0.0212133	-0.259125	-0.162015	-0.652491	-0.425103	-0.29967
-4.94888	1.32153	-0.713087	-0.227444	0.225116	-0.629552	0.536241	-0.289717	-0.734705	0.0430707	0.0904334	0.890868	-0.264572	0.074695	-0.87026	-0.283051	-0.0785728	-0.308298	-0.431869	-0.512078	-0.307587	0.376533	-0.442016	-0.615441	0.174038	-0.136765	-0.195743	-0.188671	-0.112808	-0.156549	-0.368125	-0.307402	-0.201182	0.976342	-0.668087	-0.424747	-0.556596	1.02983	-0.513587	-0.194997	-0.398801	-0.139721	-0.778681	-0.294063	-0.0215216	-0.257102	-0.163566	-0.65178	-0.424204	-0.297359
-4.9479	1.32426	-0.713221	-0.227441	0.225384	-0.629423	0.53838	-0.290616	-0.733868	0.0446655	0.0915974	0.890412	-0.266206	0.0757296	-0.869911	-0.284378	-0.0785431	-0.307475	-0.43205	-0.511786	-0.306774	0.375443	-0.441528	-0.616903	0.173133	-0.138856	-0.195446	-0.190197	-0.113677	-0.156353	-0.368745	-0.308622	-0.201528	0.976611	-0.668206	-0.424655	-0.557364	1.03172	-0.511721	-0.196624	-0.398893	-0.140868	-0.778692	-0.293759	-0.0218298	-0.255072	-0.165115	-0.651064	-0.423305	-0.295045
-4.94692	1.32703	-0.713348	-0.227444	0.22564	-0.629291	0.54052	-0.291489	-0.733024	0.0462588	0.0927762	0.889923	-0.267817	0.0767909	-0.869551	-0.285707	-0.0785172	-0.306648	-0.432227	-0.511489	-0.305957	0.374354	-0.441027	-0.618361	0.172225	-0.140944	-0.195162	-0.191727	-0.114552	-0.156174	-0.369366	-0.309819	-0.201855	0.976882	-0.668324	-0.42456	-0.558143	1.03361	-0.509836	-0.198248	-0.398989	-0.142026	-0.778686	-0.29346	-0.0221378	-0.253034	-0.166663	-0.65034	-0.422407	-0.292729
-4.94593	1.32983	-0.713469	-0.227451	0.225884	-0.629155	0.542663	-0.292335	-0.732174	0.0478506	0.09397	0.889402	-0.269405	0.0778791	-0.869181	-0.287036	-0.078495	-0.305818	-0.4324	-0.511186	-0.305135	0.373267	-0.440515	-0.619815	0.171314	-0.143031	-0.194893	-0.193262	-0.115434	-0.156013	-0.369988	-0.310993	-0.202162	0.977155	-0.66844	-0.424462	-0.558932	1.0355	-0.507932	-0.199867	-0.39909	-0.143197	-0.778661	-0.293166	-0.0224456	-0.250989	-0.168208	-0.649611	-0.42151	-0.290411
-4.94495	1.33268	-0.713584	-0.227464	0.226117	-0.629015	0.544806	-0.293155	-0.731318	0.049441	0.0951789	0.888848	-0.270969	0.0789941	-0.8688	-0.288366	-0.0784765	-0.304984	-0.432568	-0.510877	-0.304308	0.372179	-0.43999	-0.621265	0.170399	-0.145115	-0.194637	-0.194801	-0.116322	-0.155869	-0.370611	-0.312142	-0.20245	0.97743	-0.668555	-0.424361	-0.559732	1.03738	-0.50601	-0.201481	-0.399196	-0.144378	-0.778619	-0.292878	-0.0227534	-0.248937	-0.169751	-0.648874	-0.420613	-0.288092
-4.94397	1.33556	-0.713692	-0.227481	0.226337	-0.628872	0.546951	-0.293948	-0.730455	0.05103	0.0964031	0.888263	-0.272509	0.0801361	-0.86841	-0.289695	-0.0784618	-0.304147	-0.432732	-0.510562	-0.303476	0.371093	-0.439452	-0.622711	0.169481	-0.147196	-0.194395	-0.196344	-0.117216	-0.155743	-0.371235	-0.313269	-0.202719	0.977706	-0.668667	-0.424258	-0.560543	1.03927	-0.50407	-0.203091	-0.399306	-0.145572	-0.778558	-0.292595	-0.0230612	-0.246877	-0.171292	-0.648132	-0.419717	-0.285771
-4.94298	1.33847	-0.713793	-0.227502	0.226545	-0.628726	0.549098	-0.294714	-0.729586	0.0526176	0.0976427	0.887646	-0.274025	0.0813049	-0.868008	-0.291025	-0.0784509	-0.303307	-0.432891	-0.510242	-0.30264	0.370008	-0.438902	-0.624153	0.16856	-0.149275	-0.194166	-0.197891	-0.118116	-0.155635	-0.37186	-0.314371	-0.202968	0.977985	-0.668778	-0.424152	-0.561364	1.04115	-0.502112	-0.204695	-0.399421	-0.146776	-0.778481	-0.292317	-0.023369	-0.24481	-0.17283	-0.647383	-0.418822	-0.283449
-4.942	1.34142	-0.713888	-0.227529	0.226742	-0.628576	0.551245	-0.295454	-0.728711	0.0542039	0.0988979	0.886997	-0.275518	0.0825007	-0.867596	-0.292355	-0.0784437	-0.302463	-0.433046	-0.509916	-0.3018	0.368924	-0.43834	-0.62559	0.167637	-0.151351	-0.193951	-0.199443	-0.119023	-0.155544	-0.372485	-0.31545	-0.203199	0.978265	-0.668888	-0.424044	-0.562196	1.04303	-0.500135	-0.206294	-0.399541	-0.147992	-0.778386	-0.292044	-0.0236768	-0.242736	-0.174366	-0.646627	-0.417928	-0.281126
-4.94102	1.34441	-0.713977	-0.227559	0.226925	-0.628423	0.553393	-0.296167	-0.72783	0.0557889	0.100169	0.886317	-0.276987	0.0837234	-0.867174	-0.293684	-0.0784402	-0.301616	-0.433196	-0.509584	-0.300955	0.36784	-0.437766	-0.627023	0.16671	-0.153424	-0.19375	-0.200998	-0.119937	-0.155471	-0.37311	-0.316506	-0.203411	0.978547	-0.668996	-0.423932	-0.563039	1.0449	-0.498142	-0.207888	-0.399665	-0.149219	-0.778273	-0.291777	-0.0239849	-0.240656	-0.175898	-0.645865	-0.417035	-0.278803
-4.94003	1.34743	-0.714059	-0.227594	0.227097	-0.628267	0.555542	-0.296853	-0.726943	0.0573726	0.101455	0.885605	-0.278431	0.0849731	-0.866741	-0.295013	-0.0784405	-0.300767	-0.433342	-0.509247	-0.300107	0.366758	-0.437179	-0.628451	0.16578	-0.155493	-0.193563	-0.202557	-0.120856	-0.155416	-0.373736	-0.317537	-0.203604	0.97883	-0.669103	-0.423818	-0.563892	1.04678	-0.496131	-0.209475	-0.399794	-0.150457	-0.778144	-0.291515	-0.0242931	-0.238569	-0.177427	-0.645096	-0.416144	-0.276478
-4.93905	1.35048	-0.714134	-0.227633	0.227256	-0.628107	0.557691	-0.297512	-0.72605	0.0589551	0.102758	0.884863	-0.279851	0.0862498	-0.866297	-0.29634	-0.0784447	-0.299914	-0.433483	-0.508904	-0.299255	0.365678	-0.43658	-0.629875	0.164847	-0.157559	-0.19339	-0.20412	-0.121782	-0.155379	-0.374362	-0.318544	-0.203779	0.979114	-0.669208	-0.4237	-0.564756	1.04865	-0.494102	-0.211057	-0.399928	-0.151707	-0.777997	-0.291258	-0.0246015	-0.236475	-0.178953	-0.644321	-0.415253	-0.274153
-4.93807	1.35357	-0.714204	-0.227675	0.227403	-0.627944	0.559841	-0.298145	-0.725151	0.0605363	0.104076	0.884091	-0.281247	0.0875535	-0.865842	-0.297667	-0.0784526	-0.299058	-0.433619	-0.508556	-0.298399	0.364598	-0.435968	-0.631294	0.163912	-0.159622	-0.19323	-0.205686	-0.122715	-0.15536	-0.374989	-0.319528	-0.203936	0.979399	-0.669312	-0.42358	-0.56563	1.05052	-0.492057	-0.212633	-0.400066	-0.152966	-0.777833	-0.291007	-0.0249102	-0.234376	-0.180475	-0.64354	-0.414364	-0.271828
-4.93709	1.3567	-0.714266	-0.227721	0.227536	-0.627779	0.56199	-0.29875	-0.724247	0.0621163	0.105411	0.883288	-0.282618	0.0888842	-0.865377	-0.298991	-0.0784643	-0.298199	-0.433751	-0.508202	-0.29754	0.363521	-0.435344	-0.632708	0.162973	-0.161681	-0.193084	-0.207256	-0.123653	-0.155359	-0.375615	-0.320488	-0.204074	0.979686	-0.669415	-0.423457	-0.566515	1.05239	-0.489996	-0.214202	-0.400208	-0.154237	-0.777653	-0.290761	-0.0252193	-0.23227	-0.181993	-0.642752	-0.413476	-0.269503
-4.9361	1.35986	-0.714323	-0.227771	0.227658	-0.62761	0.56414	-0.299328	-0.723337	0.0636952	0.106761	0.882454	-0.283964	0.0902418	-0.8649	-0.300314	-0.0784798	-0.297338	-0.433879	-0.507844	-0.296678	0.362444	-0.434707	-0.634117	0.162032	-0.163736	-0.192951	-0.20883	-0.124598	-0.155376	-0.376241	-0.321423	-0.204195	0.979974	-0.669517	-0.423331	-0.567411	1.05425	-0.487917	-0.215764	-0.400355	-0.155518	-0.777456	-0.29052	-0.0255287	-0.230158	-0.183508	-0.641958	-0.412589	-0.267178
-4.93512	1.36305	-0.714373	-0.227824	0.227766	-0.627439	0.56629	-0.29988	-0.722421	0.065273	0.108128	0.881591	-0.285286	0.0916265	-0.864413	-0.301635	-0.0784991	-0.296473	-0.434002	-0.50748	-0.295812	0.361369	-0.434058	-0.63552	0.161088	-0.165786	-0.192833	-0.210406	-0.125549	-0.155412	-0.376866	-0.322335	-0.204297	0.980262	-0.669619	-0.423202	-0.568318	1.05611	-0.485823	-0.217319	-0.400507	-0.15681	-0.777243	-0.290285	-0.0258386	-0.22804	-0.185018	-0.641157	-0.411705	-0.264853
-4.93414	1.36627	-0.714416	-0.22788	0.227862	-0.627264	0.568439	-0.300405	-0.721499	0.0668497	0.109512	0.880699	-0.286583	0.093038	-0.863914	-0.302954	-0.0785222	-0.295606	-0.43412	-0.507111	-0.294944	0.360296	-0.433397	-0.636919	0.160141	-0.167833	-0.192728	-0.211986	-0.126507	-0.155465	-0.377492	-0.323223	-0.204382	0.980551	-0.669719	-0.42307	-0.569235	1.05797	-0.483712	-0.218867	-0.400663	-0.158113	-0.777013	-0.290055	-0.026149	-0.225916	-0.186524	-0.64035	-0.410822	-0.262528
-4.93315	1.36953	-0.714454	-0.227939	0.227944	-0.627087	0.570587	-0.300902	-0.720572	0.0684253	0.110912	0.879777	-0.287856	0.0944766	-0.863405	-0.30427	-0.0785491	-0.294737	-0.434233	-0.506737	-0.294073	0.359225	-0.432722	-0.638313	0.159191	-0.169875	-0.192637	-0.213569	-0.12747	-0.155537	-0.378116	-0.324087	-0.204449	0.980841	-0.669818	-0.422935	-0.570163	1.05983	-0.481586	-0.220408	-0.400824	-0.159425	-0.776767	-0.28983	-0.0264599	-0.223787	-0.188026	-0.639536	-0.40994	-0.260205
-4.93217	1.37282	-0.714485	-0.228002	0.228014	-0.626907	0.572735	-0.301373	-0.71964	0.0699998	0.112329	0.878826	-0.289103	0.095942	-0.862884	-0.305583	-0.0785799	-0.293864	-0.434342	-0.506358	-0.2932	0.358155	-0.432036	-0.639701	0.158239	-0.171913	-0.19256	-0.215154	-0.12844	-0.155628	-0.378741	-0.324926	-0.204499	0.981132	-0.669917	-0.422797	-0.571101	1.06169	-0.479445	-0.221942	-0.400989	-0.160748	-0.776505	-0.289611	-0.0267714	-0.221652	-0.189523	-0.638716	-0.409061	-0.257882
-4.93119	1.37614	-0.714509	-0.228066	0.22807	-0.626724	0.574882	-0.301816	-0.718703	0.0715734	0.113762	0.877846	-0.290325	0.0974344	-0.862352	-0.306894	-0.0786145	-0.29299	-0.434446	-0.505974	-0.292324	0.357087	-0.431336	-0.641083	0.157284	-0.173946	-0.192496	-0.216743	-0.129417	-0.155737	-0.379364	-0.325742	-0.204531	0.981423	-0.670014	-0.422656	-0.57205	1.06354	-0.477288	-0.223467	-0.401158	-0.162081	-0.776227	-0.289397	-0.0270836	-0.219512	-0.191015	-0.63789	-0.408183	-0.25556
-4.9302	1.37949	-0.714527	-0.228134	0.228114	-0.626539	0.577027	-0.302233	-0.71776	0.073146	0.115213	0.876837	-0.291522	0.0989536	-0.861809	-0.308201	-0.078653	-0.292112	-0.434545	-0.505585	-0.291446	0.356021	-0.430625	-0.64246	0.156327	-0.175974	-0.192446	-0.218334	-0.130399	-0.155864	-0.379987	-0.326533	-0.204547	0.981714	-0.670112	-0.422512	-0.57301	1.06539	-0.475116	-0.224985	-0.401332	-0.163423	-0.775933	-0.289188	-0.0273964	-0.217368	-0.192502	-0.637057	-0.407308	-0.253239
-4.92922	1.38287	-0.714539	-0.228203	0.228144	-0.626352	0.579172	-0.302622	-0.716812	0.0747177	0.11668	0.875801	-0.292694	0.1005	-0.861254	-0.309505	-0.0786953	-0.291233	-0.434639	-0.505191	-0.290566	0.354957	-0.4299	-0.643831	0.155367	-0.177997	-0.192409	-0.219928	-0.131388	-0.15601	-0.380608	-0.327301	-0.204545	0.982006	-0.670208	-0.422365	-0.57398	1.06723	-0.472929	-0.226495	-0.40151	-0.164776	-0.775624	-0.288985	-0.02771	-0.215218	-0.193985	-0.636218	-0.406435	-0.25092
-4.92824	1.38628	-0.714544	-0.228275	0.22816	-0.626161	0.581314	-0.302984	-0.715859	0.0762885	0.118164	0.874736	-0.29384	0.102072	-0.860689	-0.310804	-0.0787415	-0.290351	-0.434729	-0.504793	-0.289684	0.353896	-0.429163	-0.645196	0.154404	-0.180015	-0.192387	-0.221524	-0.132383	-0.156175	-0.381229	-0.328044	-0.204526	0.982297	-0.670304	-0.422214	-0.574961	1.06908	-0.470727	-0.227996	-0.401693	-0.166139	-0.775299	-0.288787	-0.0280244	-0.213063	-0.195461	-0.635372	-0.405564	-0.248603
-4.92726	1.38973	-0.714543	-0.228349	0.228164	-0.625969	0.583456	-0.30332	-0.7149	0.0778583	0.119666	0.873643	-0.294962	0.103672	-0.860112	-0.3121	-0.0787915	-0.289466	-0.434814	-0.50439	-0.288801	0.352836	-0.428414	-0.646556	0.153439	-0.182027	-0.192378	-0.223123	-0.133384	-0.156358	-0.381848	-0.328763	-0.204491	0.982589	-0.6704	-0.422061	-0.575952	1.07092	-0.468512	-0.229488	-0.40188	-0.167511	-0.774959	-0.288594	-0.0283396	-0.210904	-0.196933	-0.63452	-0.404695	-0.246287
-4.92627	1.3932	-0.714536	-0.228425	0.228154	-0.625774	0.585595	-0.303628	-0.713938	0.0794274	0.121185	0.872523	-0.296057	0.105298	-0.859523	-0.313392	-0.0788454	-0.28858	-0.434894	-0.503983	-0.287915	0.351779	-0.427652	-0.647909	0.152472	-0.184034	-0.192382	-0.224724	-0.134391	-0.15656	-0.382466	-0.329458	-0.20444	0.982881	-0.670495	-0.421904	-0.576954	1.07275	-0.466282	-0.230972	-0.402072	-0.168892	-0.774604	-0.288407	-0.0286557	-0.20874	-0.198398	-0.633662	-0.403829	-0.243973
-4.92529	1.3967	-0.714523	-0.228503	0.22813	-0.625577	0.587733	-0.30391	-0.71297	0.0809956	0.122721	0.871376	-0.297128	0.106951	-0.858923	-0.314679	-0.0789032	-0.287691	-0.434969	-0.503571	-0.287029	0.350724	-0.426877	-0.649256	0.151502	-0.186035	-0.1924	-0.226327	-0.135405	-0.156781	-0.383083	-0.330129	-0.204372	0.983172	-0.67059	-0.421744	-0.577967	1.07459	-0.464038	-0.232446	-0.402268	-0.170283	-0.774234	-0.288226	-0.0289728	-0.206572	-0.199858	-0.632797	-0.402966	-0.241662
-4.92431	1.40023	-0.714503	-0.228582	0.228093	-0.625378	0.589868	-0.304164	-0.711997	0.0825631	0.124274	0.870202	-0.298172	0.10863	-0.858312	-0.315961	-0.0789649	-0.286801	-0.435039	-0.503155	-0.286141	0.349671	-0.426089	-0.650597	0.150529	-0.188031	-0.192432	-0.227931	-0.136424	-0.157021	-0.383698	-0.330776	-0.204287	0.983463	-0.670685	-0.42158	-0.578989	1.07642	-0.461781	-0.233911	-0.402468	-0.171683	-0.773849	-0.288049	-0.0292908	-0.2044	-0.201312	-0.631926	-0.402105	-0.239353
-4.92332	1.40379	-0.714477	-0.228663	0.228042	-0.625177	0.592001	-0.304392	-0.71102	0.0841298	0.125845	0.869001	-0.299191	0.110336	-0.857689	-0.317239	-0.0790305	-0.285908	-0.435105	-0.502734	-0.285252	0.348621	-0.425289	-0.651932	0.149555	-0.19002	-0.192477	-0.229538	-0.13745	-0.15728	-0.384311	-0.331399	-0.204187	0.983754	-0.67078	-0.421414	-0.580023	1.07825	-0.45951	-0.235367	-0.402672	-0.173093	-0.773449	-0.287878	-0.0296099	-0.202224	-0.202759	-0.631049	-0.401247	-0.237046
-4.92234	1.40738	-0.714445	-0.228744	0.227977	-0.624973	0.594131	-0.304592	-0.710038	0.0856958	0.127433	0.867773	-0.300185	0.112069	-0.857054	-0.318511	-0.0790999	-0.285013	-0.435165	-0.50231	-0.284362	0.347573	-0.424476	-0.65326	0.148578	-0.192003	-0.192536	-0.231146	-0.138482	-0.157557	-0.384923	-0.331997	-0.204071	0.984043	-0.670874	-0.421244	-0.581066	1.08007	-0.457226	-0.236813	-0.402881	-0.174511	-0.773035	-0.287713	-0.0299301	-0.200044	-0.2042	-0.630165	-0.400391	-0.234742
-4.92136	1.411	-0.714406	-0.228827	0.227899	-0.624768	0.596258	-0.304766	-0.709052	0.0872611	0.129039	0.86652	-0.301153	0.113827	-0.856408	-0.319778	-0.0791733	-0.284117	-0.435221	-0.501881	-0.283472	0.346528	-0.423651	-0.654581	0.147598	-0.19398	-0.192608	-0.232756	-0.13952	-0.157854	-0.385532	-0.332572	-0.203939	0.984333	-0.670968	-0.421071	-0.58212	1.0819	-0.45493	-0.23825	-0.403094	-0.175938	-0.772606	-0.287553	-0.0302514	-0.19786	-0.205635	-0.629275	-0.399539	-0.232442
-4.92037	1.41464	-0.714361	-0.228911	0.227807	-0.624561	0.598383	-0.304912	-0.708062	0.0888257	0.130663	0.86524	-0.302095	0.115612	-0.855751	-0.321039	-0.0792506	-0.283218	-0.435272	-0.501449	-0.28258	0.345486	-0.422813	-0.655896	0.146617	-0.19595	-0.192694	-0.234367	-0.140564	-0.15817	-0.38614	-0.333122	-0.203791	0.984621	-0.671063	-0.420894	-0.583185	1.08372	-0.452621	-0.239676	-0.403311	-0.177374	-0.772163	-0.287399	-0.0305739	-0.195673	-0.207063	-0.628378	-0.398689	-0.230144
-4.91939	1.41831	-0.71431	-0.228996	0.227701	-0.624352	0.600505	-0.305032	-0.707067	0.0903898	0.132305	0.863935	-0.303011	0.117423	-0.855081	-0.322294	-0.0793319	-0.282318	-0.435317	-0.501012	-0.281689	0.344446	-0.421962	-0.657205	0.145633	-0.197913	-0.192793	-0.23598	-0.141615	-0.158504	-0.386746	-0.333649	-0.203628	0.984909	-0.671157	-0.420714	-0.58426	1.08553	-0.450299	-0.241092	-0.403533	-0.178819	-0.771707	-0.287249	-0.0308976	-0.193483	-0.208485	-0.627476	-0.397843	-0.227849
-4.91841	1.422	-0.714253	-0.229082	0.227581	-0.624142	0.602623	-0.305125	-0.706068	0.0919532	0.133964	0.862605	-0.303901	0.119261	-0.854401	-0.323542	-0.0794171	-0.281416	-0.435358	-0.500572	-0.280797	0.343409	-0.421099	-0.658506	0.144647	-0.19987	-0.192905	-0.237593	-0.142671	-0.158858	-0.387349	-0.334151	-0.20345	0.985195	-0.671251	-0.420531	-0.585345	1.08734	-0.447965	-0.242497	-0.403758	-0.180272	-0.771236	-0.287106	-0.0312226	-0.19129	-0.209899	-0.626566	-0.397	-0.225558
-4.91742	1.42573	-0.71419	-0.229167	0.227447	-0.623929	0.604738	-0.305192	-0.705065	0.0935161	0.135642	0.86125	-0.304765	0.121124	-0.853708	-0.324785	-0.0795062	-0.280513	-0.435394	-0.500128	-0.279904	0.342375	-0.420223	-0.6598	0.143659	-0.201819	-0.193031	-0.239208	-0.143733	-0.159231	-0.387951	-0.33463	-0.203257	0.98548	-0.671346	-0.420344	-0.58644	1.08915	-0.44562	-0.243892	-0.403988	-0.181734	-0.770751	-0.286968	-0.0315489	-0.189093	-0.211306	-0.625651	-0.39616	-0.223271
-4.91644	1.42947	-0.71412	-0.229254	0.227299	-0.623715	0.606849	-0.305232	-0.704058	0.0950784	0.137337	0.85987	-0.305604	0.123013	-0.853004	-0.32602	-0.0795992	-0.279608	-0.435424	-0.499681	-0.279012	0.341344	-0.419334	-0.661088	0.142669	-0.203761	-0.19317	-0.240823	-0.144802	-0.159624	-0.38855	-0.335084	-0.203048	0.985764	-0.671441	-0.420154	-0.587545	1.09096	-0.443263	-0.245276	-0.404222	-0.183204	-0.770253	-0.286835	-0.0318766	-0.186894	-0.212706	-0.624729	-0.395324	-0.220988
-4.91546	1.43324	-0.714044	-0.22934	0.227137	-0.6235	0.608957	-0.305245	-0.703047	0.0966403	0.13905	0.858466	-0.306417	0.124928	-0.852288	-0.327249	-0.0796963	-0.278702	-0.43545	-0.49923	-0.27812	0.340316	-0.418433	-0.662368	0.141676	-0.205696	-0.193323	-0.242439	-0.145876	-0.160035	-0.389146	-0.335515	-0.202825	0.986047	-0.671536	-0.41996	-0.588661	1.09276	-0.440894	-0.246648	-0.404461	-0.184683	-0.769742	-0.286708	-0.0322057	-0.184692	-0.214098	-0.623801	-0.394491	-0.218708
-4.91448	1.43704	-0.713963	-0.229426	0.226961	-0.623283	0.61106	-0.305231	-0.702032	0.0982017	0.140782	0.857038	-0.307203	0.126868	-0.85156	-0.328471	-0.0797973	-0.277794	-0.43547	-0.498775	-0.277228	0.339291	-0.417519	-0.663641	0.140682	-0.207623	-0.193489	-0.244056	-0.146957	-0.160466	-0.38974	-0.335921	-0.202587	0.986327	-0.671631	-0.419763	-0.589787	1.09456	-0.438515	-0.24801	-0.404703	-0.186169	-0.769217	-0.286587	-0.0325362	-0.182488	-0.215483	-0.622867	-0.393662	-0.216433
-4.91349	1.44086	-0.713875	-0.229512	0.22677	-0.623065	0.613159	-0.305191	-0.701014	0.0997626	0.142531	0.855585	-0.307964	0.128835	-0.85082	-0.329685	-0.0799022	-0.276884	-0.435486	-0.498317	-0.276336	0.338269	-0.416592	-0.664907	0.139686	-0.209543	-0.193667	-0.245673	-0.148043	-0.160916	-0.390331	-0.336304	-0.202335	0.986607	-0.671727	-0.419562	-0.590923	1.09635	-0.436124	-0.24936	-0.40495	-0.187663	-0.76868	-0.286471	-0.0328683	-0.180281	-0.21686	-0.621926	-0.392836	-0.214162
-4.91251	1.4447	-0.71378	-0.229598	0.226566	-0.622845	0.615254	-0.305124	-0.699991	0.101323	0.144299	0.85411	-0.308699	0.130826	-0.850069	-0.330891	-0.0800112	-0.275974	-0.435496	-0.497856	-0.275445	0.337251	-0.415653	-0.666165	0.138687	-0.211454	-0.193859	-0.24729	-0.149136	-0.161385	-0.390919	-0.336663	-0.202068	0.986884	-0.671824	-0.419358	-0.592068	1.09814	-0.433723	-0.250698	-0.4052	-0.189165	-0.768129	-0.28636	-0.0332019	-0.178073	-0.218229	-0.620979	-0.392014	-0.211896
-4.91153	1.44857	-0.71368	-0.229684	0.226347	-0.622624	0.617345	-0.305031	-0.698966	0.102883	0.146085	0.852611	-0.309408	0.132843	-0.849306	-0.33209	-0.0801241	-0.275062	-0.435501	-0.497392	-0.274555	0.336235	-0.414701	-0.667416	0.137687	-0.213358	-0.194065	-0.248907	-0.150234	-0.161873	-0.391505	-0.336998	-0.201787	0.98716	-0.67192	-0.419151	-0.593224	1.09993	-0.431312	-0.252025	-0.405455	-0.190675	-0.767566	-0.286255	-0.0335371	-0.175862	-0.219591	-0.620026	-0.391196	-0.209635
-4.91054	1.45246	-0.713574	-0.229768	0.226114	-0.622402	0.619431	-0.304912	-0.697937	0.104443	0.147889	0.851089	-0.31009	0.134885	-0.848531	-0.333281	-0.080241	-0.274149	-0.435501	-0.496925	-0.273665	0.335223	-0.413737	-0.668659	0.136685	-0.215253	-0.194283	-0.250524	-0.151339	-0.162381	-0.392087	-0.337309	-0.201493	0.987433	-0.672018	-0.418939	-0.59439	1.10171	-0.42889	-0.253339	-0.405714	-0.192192	-0.76699	-0.286156	-0.033874	-0.173649	-0.220943	-0.619066	-0.390382	-0.207378
-4.90956	1.45637	-0.713461	-0.229853	0.225867	-0.622179	0.621512	-0.304767	-0.696905	0.106003	0.149712	0.849544	-0.310747	0.136952	-0.847745	-0.334463	-0.080362	-0.273235	-0.435496	-0.496455	-0.272776	0.334215	-0.412759	-0.669894	0.135681	-0.21714	-0.194514	-0.252141	-0.152449	-0.162908	-0.392666	-0.337597	-0.201184	0.987704	-0.672116	-0.418725	-0.595565	1.10349	-0.426459	-0.254641	-0.405976	-0.193717	-0.766402	-0.286062	-0.0342125	-0.171435	-0.222288	-0.618101	-0.389572	-0.205127
-4.90858	1.4603	-0.713343	-0.229936	0.225605	-0.621955	0.623588	-0.304595	-0.695869	0.107562	0.151552	0.847977	-0.311378	0.139044	-0.846946	-0.335636	-0.080487	-0.27232	-0.435486	-0.495982	-0.271889	0.333209	-0.411769	-0.671121	0.134675	-0.219019	-0.194758	-0.253758	-0.153565	-0.163455	-0.393242	-0.337861	-0.200861	0.987973	-0.672214	-0.418506	-0.596751	1.10527	-0.424018	-0.255931	-0.406243	-0.195249	-0.765802	-0.285974	-0.0345528	-0.16922	-0.223624	-0.617129	-0.388766	-0.20288
-4.90759	1.46426	-0.713218	-0.230018	0.225329	-0.62173	0.625658	-0.304397	-0.69483	0.109121	0.153412	0.846388	-0.311983	0.141161	-0.846136	-0.336801	-0.0806159	-0.271404	-0.435471	-0.495507	-0.271002	0.332208	-0.410767	-0.672341	0.133667	-0.220889	-0.195015	-0.255374	-0.154687	-0.164021	-0.393815	-0.338102	-0.200526	0.98824	-0.672313	-0.418284	-0.597946	1.10704	-0.421568	-0.257208	-0.406514	-0.196789	-0.765189	-0.285891	-0.0348949	-0.167003	-0.224952	-0.61615	-0.387965	-0.20064
-4.90661	1.46823	-0.713088	-0.230099	0.225039	-0.621504	0.627724	-0.304174	-0.693789	0.11068	0.15529	0.844777	-0.312561	0.143303	-0.845314	-0.337957	-0.080749	-0.270487	-0.43545	-0.495029	-0.270117	0.33121	-0.409751	-0.673552	0.132658	-0.222749	-0.195285	-0.25699	-0.155815	-0.164607	-0.394385	-0.338318	-0.200176	0.988504	-0.672413	-0.418059	-0.599151	1.1088	-0.419109	-0.258472	-0.406789	-0.198335	-0.764565	-0.285814	-0.0352387	-0.164786	-0.226271	-0.615165	-0.387167	-0.198405
-4.90563	1.47223	-0.712951	-0.230178	0.224734	-0.621278	0.629783	-0.303924	-0.692744	0.112238	0.157186	0.843145	-0.313114	0.145469	-0.84448	-0.339104	-0.080886	-0.26957	-0.435424	-0.494548	-0.269233	0.330215	-0.408723	-0.674756	0.131646	-0.224601	-0.195568	-0.258604	-0.156949	-0.165212	-0.394951	-0.338512	-0.199814	0.988765	-0.672514	-0.417829	-0.600365	1.11057	-0.416641	-0.259724	-0.407068	-0.199888	-0.763929	-0.285743	-0.0355844	-0.162567	-0.22758	-0.614175	-0.386374	-0.196175
-4.90465	1.47624	-0.712808	-0.230256	0.224414	-0.62105	0.631837	-0.303649	-0.691697	0.113796	0.159101	0.841491	-0.313641	0.147659	-0.843635	-0.340241	-0.0810272	-0.268651	-0.435393	-0.494066	-0.268351	0.329224	-0.407683	-0.675951	0.130633	-0.226444	-0.195863	-0.260218	-0.158089	-0.165836	-0.395513	-0.338682	-0.199438	0.989023	-0.672616	-0.417596	-0.601589	1.11233	-0.414165	-0.260962	-0.407351	-0.201448	-0.763282	-0.285677	-0.035932	-0.160348	-0.228881	-0.613177	-0.385586	-0.193952
-4.90366	1.48027	-0.71266	-0.230332	0.224081	-0.620822	0.633885	-0.303347	-0.690647	0.115355	0.161034	0.839817	-0.314142	0.149873	-0.842777	-0.341368	-0.0811723	-0.267732	-0.435356	-0.493581	-0.26747	0.328238	-0.40663	-0.677138	0.129619	-0.228277	-0.196171	-0.261831	-0.159234	-0.16648	-0.396072	-0.338828	-0.199049	0.989279	-0.672718	-0.41736	-0.602822	1.11408	-0.41168	-0.262186	-0.407637	-0.203015	-0.762623	-0.285617	-0.0362816	-0.158128	-0.230173	-0.612174	-0.384802	-0.191735
-4.90268	1.48432	-0.712505	-0.230407	0.223732	-0.620593	0.635927	-0.303021	-0.689594	0.116913	0.162986	0.838122	-0.314617	0.152112	-0.841908	-0.342486	-0.0813216	-0.266812	-0.435315	-0.493093	-0.266591	0.327254	-0.405564	-0.678317	0.128602	-0.230101	-0.196492	-0.263442	-0.160386	-0.167143	-0.396627	-0.338952	-0.198648	0.989531	-0.672822	-0.41712	-0.604065	1.11583	-0.409188	-0.263398	-0.407928	-0.204588	-0.761953	-0.285562	-0.0366331	-0.155907	-0.231455	-0.611164	-0.384023	-0.189524
-4.9017	1.48839	-0.712345	-0.230479	0.22337	-0.620364	0.637963	-0.302668	-0.688539	0.118471	0.164956	0.836407	-0.315066	0.154374	-0.841027	-0.343593	-0.0814749	-0.265892	-0.435268	-0.492604	-0.265714	0.326275	-0.404486	-0.679487	0.127584	-0.231915	-0.196826	-0.265052	-0.161543	-0.167826	-0.397179	-0.339052	-0.198234	0.98978	-0.672926	-0.416876	-0.605317	1.11758	-0.406687	-0.264595	-0.408223	-0.206168	-0.761272	-0.285514	-0.0369866	-0.153687	-0.232728	-0.610148	-0.383249	-0.18732
-4.90071	1.49248	-0.712178	-0.23055	0.222992	-0.620135	0.639993	-0.302291	-0.687481	0.120029	0.166945	0.834672	-0.315489	0.15666	-0.840134	-0.34469	-0.0816323	-0.264971	-0.435215	-0.492113	-0.264839	0.3253	-0.403395	-0.680648	0.126565	-0.233719	-0.197171	-0.26666	-0.162705	-0.168528	-0.397726	-0.339128	-0.197808	0.990026	-0.673032	-0.416628	-0.606579	1.11932	-0.40418	-0.265779	-0.408521	-0.207754	-0.760581	-0.285471	-0.0373422	-0.151467	-0.233992	-0.609126	-0.38248	-0.185122
-4.89973	1.49658	-0.712006	-0.230618	0.222601	-0.619905	0.642015	-0.301888	-0.686421	0.121587	0.168953	0.832917	-0.315886	0.158969	-0.83923	-0.345777	-0.0817939	-0.26405	-0.435158	-0.49162	-0.263966	0.324329	-0.402291	-0.681801	0.125544	-0.235513	-0.19753	-0.268266	-0.163874	-0.16925	-0.39827	-0.339182	-0.197369	0.990268	-0.673138	-0.416376	-0.607849	1.12105	-0.401665	-0.266949	-0.408823	-0.209346	-0.759878	-0.285433	-0.0376999	-0.149246	-0.235245	-0.608097	-0.381716	-0.182932
-4.89875	1.5007	-0.711828	-0.230684	0.222194	-0.619674	0.644031	-0.30146	-0.685359	0.123145	0.170979	0.831143	-0.316258	0.161302	-0.838313	-0.346852	-0.0819595	-0.263129	-0.435095	-0.491125	-0.263095	0.323361	-0.401175	-0.682945	0.124521	-0.237297	-0.1979	-0.26987	-0.165048	-0.169991	-0.398809	-0.339213	-0.196918	0.990507	-0.673246	-0.416121	-0.609129	1.12279	-0.399143	-0.268104	-0.409129	-0.210944	-0.759166	-0.285401	-0.0380597	-0.147026	-0.236489	-0.607062	-0.380957	-0.180748
-4.89776	1.50484	-0.711643	-0.230747	0.221773	-0.619444	0.64604	-0.301007	-0.684295	0.124702	0.173024	0.82935	-0.316603	0.163657	-0.837385	-0.347917	-0.0821292	-0.262207	-0.435026	-0.490629	-0.262227	0.322398	-0.400047	-0.684081	0.123497	-0.23907	-0.198283	-0.271473	-0.166228	-0.170752	-0.399344	-0.339221	-0.196456	0.990742	-0.673355	-0.415862	-0.610418	1.12451	-0.396614	-0.269245	-0.409439	-0.212548	-0.758443	-0.285375	-0.0384217	-0.144807	-0.237723	-0.606021	-0.380202	-0.178571
-4.89678	1.50899	-0.711453	-0.230808	0.221338	-0.619213	0.648042	-0.300528	-0.683229	0.12626	0.175088	0.827538	-0.316923	0.166036	-0.836445	-0.34897	-0.0823031	-0.261285	-0.434953	-0.490131	-0.261361	0.321439	-0.398905	-0.685207	0.122471	-0.240833	-0.198679	-0.273073	-0.167413	-0.171532	-0.399875	-0.339206	-0.195981	0.990973	-0.673465	-0.415599	-0.611716	1.12624	-0.394079	-0.270372	-0.409753	-0.214158	-0.75771	-0.285355	-0.0387858	-0.142589	-0.238947	-0.604974	-0.379454	-0.176402
-4.8958	1.51316	-0.711258	-0.230865	0.220888	-0.618982	0.650037	-0.300026	-0.682161	0.127818	0.17717	0.825707	-0.317217	0.168437	-0.835494	-0.350012	-0.0824811	-0.260362	-0.434874	-0.489632	-0.260498	0.320485	-0.397752	-0.686324	0.121444	-0.242586	-0.199086	-0.27467	-0.168604	-0.172331	-0.400402	-0.339168	-0.195495	0.9912	-0.673576	-0.415333	-0.613023	1.12795	-0.391538	-0.271483	-0.41007	-0.215773	-0.756967	-0.285341	-0.0391523	-0.140371	-0.240161	-0.60392	-0.37871	-0.17424
-4.89481	1.51734	-0.711056	-0.23092	0.220423	-0.618751	0.652024	-0.299498	-0.681092	0.129377	0.17927	0.823859	-0.317486	0.17086	-0.83453	-0.351043	-0.0826633	-0.25944	-0.434789	-0.489132	-0.259637	0.319534	-0.396586	-0.687432	0.120416	-0.244328	-0.199506	-0.276265	-0.169801	-0.17315	-0.400924	-0.339107	-0.194997	0.991423	-0.673689	-0.415062	-0.614338	1.12967	-0.388991	-0.27258	-0.410392	-0.217394	-0.756214	-0.285332	-0.039521	-0.138154	-0.241364	-0.60286	-0.377972	-0.172085
-4.89383	1.52153	-0.710849	-0.230972	0.219944	-0.61852	0.654004	-0.298946	-0.68002	0.130935	0.18139	0.821993	-0.317729	0.173306	-0.833556	-0.352061	-0.0828496	-0.258517	-0.434699	-0.488631	-0.258779	0.318588	-0.395407	-0.688531	0.119386	-0.246058	-0.199937	-0.277857	-0.171003	-0.173989	-0.401442	-0.339024	-0.194488	0.991642	-0.673803	-0.414788	-0.615662	1.13137	-0.386438	-0.273662	-0.410717	-0.21902	-0.755452	-0.285329	-0.039892	-0.135939	-0.242557	-0.601794	-0.37724	-0.169939
-4.89285	1.52574	-0.710635	-0.23102	0.21945	-0.61829	0.655976	-0.29837	-0.678947	0.132493	0.183528	0.820109	-0.317947	0.175774	-0.832569	-0.353068	-0.0830401	-0.257595	-0.434604	-0.488129	-0.257924	0.317647	-0.394216	-0.689621	0.118355	-0.247778	-0.200381	-0.279446	-0.172211	-0.174846	-0.401956	-0.338919	-0.193968	0.991856	-0.673918	-0.41451	-0.616995	1.13308	-0.38388	-0.274729	-0.411046	-0.220652	-0.75468	-0.285332	-0.0402653	-0.133725	-0.24374	-0.600721	-0.376513	-0.1678
-4.89187	1.52996	-0.710416	-0.231065	0.218941	-0.618059	0.65794	-0.297769	-0.677873	0.134052	0.185685	0.818208	-0.318139	0.178264	-0.831571	-0.354062	-0.0832347	-0.256673	-0.434503	-0.487625	-0.257072	0.316709	-0.393012	-0.690701	0.117322	-0.249486	-0.200836	-0.281032	-0.173424	-0.175724	-0.402464	-0.33879	-0.193437	0.992066	-0.674035	-0.414228	-0.618337	1.13478	-0.381317	-0.27578	-0.411378	-0.222289	-0.753899	-0.28534	-0.0406411	-0.131513	-0.244912	-0.599643	-0.375792	-0.16567
-4.89088	1.53419	-0.710192	-0.231107	0.218418	-0.617829	0.659896	-0.297145	-0.676798	0.13561	0.18786	0.81629	-0.318306	0.180775	-0.830561	-0.355043	-0.0834336	-0.255751	-0.434396	-0.487121	-0.256222	0.315777	-0.391796	-0.691772	0.116288	-0.251183	-0.201303	-0.282614	-0.174643	-0.17662	-0.402968	-0.33864	-0.192894	0.992271	-0.674153	-0.413942	-0.619686	1.13647	-0.378749	-0.276816	-0.411714	-0.22393	-0.75311	-0.285355	-0.0410192	-0.129302	-0.246073	-0.598557	-0.375077	-0.163548
-4.8899	1.53844	-0.709961	-0.231145	0.217881	-0.617599	0.661843	-0.296496	-0.675721	0.137169	0.190054	0.814355	-0.318447	0.183307	-0.82954	-0.356012	-0.0836366	-0.254829	-0.434284	-0.486617	-0.255376	0.314849	-0.390568	-0.692834	0.115253	-0.252868	-0.201782	-0.284193	-0.175867	-0.177536	-0.403468	-0.338467	-0.192341	0.992472	-0.674273	-0.413653	-0.621045	1.13816	-0.376176	-0.277836	-0.412054	-0.225577	-0.752311	-0.285375	-0.0413998	-0.127094	-0.247223	-0.597466	-0.374367	-0.161434
-4.88892	1.54269	-0.709725	-0.231179	0.217329	-0.617369	0.663782	-0.295824	-0.674643	0.138728	0.192266	0.812404	-0.318563	0.185861	-0.828507	-0.356969	-0.0838439	-0.253907	-0.434167	-0.486112	-0.254533	0.313925	-0.389327	-0.693885	0.114217	-0.254541	-0.202273	-0.285768	-0.177097	-0.178472	-0.403962	-0.338273	-0.191778	0.992667	-0.674394	-0.413359	-0.622411	1.13984	-0.373599	-0.278841	-0.412397	-0.227228	-0.751504	-0.285401	-0.0417829	-0.124887	-0.248362	-0.596368	-0.373664	-0.159329
-4.88793	1.54696	-0.709483	-0.231209	0.216762	-0.61714	0.665713	-0.295128	-0.673564	0.140288	0.194497	0.810437	-0.318654	0.188436	-0.827462	-0.357912	-0.0840554	-0.252986	-0.434044	-0.485606	-0.253694	0.313006	-0.388073	-0.694927	0.113179	-0.256203	-0.202775	-0.28734	-0.178332	-0.179426	-0.404452	-0.338056	-0.191204	0.992858	-0.674517	-0.413061	-0.623786	1.14152	-0.371019	-0.279829	-0.412744	-0.228883	-0.750688	-0.285433	-0.0421684	-0.122683	-0.249491	-0.595264	-0.372966	-0.157233
-4.88695	1.55124	-0.709236	-0.231235	0.216181	-0.616911	0.667635	-0.294408	-0.672484	0.141847	0.196747	0.808455	-0.31872	0.191031	-0.826406	-0.358841	-0.0842711	-0.252065	-0.433916	-0.485101	-0.252858	0.312092	-0.386808	-0.695959	0.11214	-0.257852	-0.203288	-0.288907	-0.179572	-0.1804	-0.404936	-0.337817	-0.19062	0.993043	-0.674641	-0.41276	-0.625169	1.14319	-0.368434	-0.280802	-0.413095	-0.230544	-0.749864	-0.285471	-0.0425565	-0.120482	-0.250608	-0.594154	-0.372275	-0.155145
-4.88597	1.55552	-0.708983	-0.231257	0.215585	-0.616683	0.669548	-0.293666	-0.671403	0.143407	0.199015	0.806457	-0.318761	0.193647	-0.825339	-0.359758	-0.084491	-0.251144	-0.433782	-0.484595	-0.252025	0.311182	-0.38553	-0.696982	0.1111	-0.259489	-0.203813	-0.290471	-0.180818	-0.181393	-0.405416	-0.337556	-0.190025	0.993223	-0.674767	-0.412455	-0.626559	1.14486	-0.365846	-0.281758	-0.413449	-0.232208	-0.749032	-0.285514	-0.0429472	-0.118283	-0.251713	-0.593037	-0.37159	-0.153066
-4.88498	1.55982	-0.708724	-0.231275	0.214975	-0.616456	0.671452	-0.2929	-0.670322	0.144968	0.201301	0.804444	-0.318777	0.196282	-0.82426	-0.36066	-0.0847152	-0.250224	-0.433642	-0.484089	-0.251196	0.310278	-0.38424	-0.697994	0.110059	-0.261114	-0.20435	-0.292029	-0.182069	-0.182406	-0.405891	-0.337274	-0.189421	0.993398	-0.674894	-0.412145	-0.627958	1.14652	-0.363255	-0.282698	-0.413807	-0.233877	-0.748192	-0.285564	-0.0433405	-0.116087	-0.252808	-0.591914	-0.370911	-0.150997
-4.884	1.56412	-0.70846	-0.231288	0.21435	-0.616229	0.673347	-0.292111	-0.66924	0.146528	0.203606	0.802416	-0.318768	0.198938	-0.82317	-0.361549	-0.0849437	-0.249305	-0.433497	-0.483583	-0.25037	0.309378	-0.382937	-0.698996	0.109017	-0.262727	-0.204897	-0.293584	-0.183325	-0.183438	-0.40636	-0.33697	-0.188807	0.993567	-0.675024	-0.411832	-0.629364	1.14817	-0.36066	-0.283621	-0.414169	-0.235549	-0.747345	-0.28562	-0.0437363	-0.113895	-0.253891	-0.590785	-0.370239	-0.148937
-4.88302	1.56843	-0.70819	-0.231296	0.213711	-0.616003	0.675232	-0.291299	-0.668158	0.148089	0.205929	0.800373	-0.318734	0.201613	-0.822069	-0.362424	-0.0851764	-0.248386	-0.433346	-0.483078	-0.249548	0.308483	-0.381622	-0.699988	0.107974	-0.264327	-0.205456	-0.295133	-0.184587	-0.184488	-0.406824	-0.336645	-0.188183	0.993731	-0.675155	-0.411515	-0.630778	1.14982	-0.358063	-0.284528	-0.414534	-0.237226	-0.74649	-0.285681	-0.0441349	-0.111705	-0.254962	-0.589649	-0.369573	-0.146886
-4.88204	1.57275	-0.707915	-0.2313	0.213057	-0.615778	0.677108	-0.290465	-0.667075	0.14965	0.208271	0.798317	-0.318676	0.204307	-0.820956	-0.363285	-0.0854135	-0.247468	-0.43319	-0.482572	-0.24873	0.307592	-0.380295	-0.70097	0.106929	-0.265913	-0.206026	-0.296678	-0.185854	-0.185558	-0.407283	-0.336298	-0.187549	0.993888	-0.675288	-0.411194	-0.6322	1.15147	-0.355464	-0.285418	-0.414902	-0.238906	-0.745627	-0.285748	-0.0445361	-0.109519	-0.256022	-0.588507	-0.368914	-0.144845
-4.88105	1.57707	-0.707634	-0.231299	0.212389	-0.615554	0.678975	-0.289609	-0.665992	0.151212	0.210631	0.796247	-0.318593	0.207021	-0.819832	-0.364131	-0.0856548	-0.246551	-0.433028	-0.482068	-0.247916	0.306707	-0.378956	-0.701942	0.105884	-0.267487	-0.206606	-0.298217	-0.187126	-0.186647	-0.407737	-0.33593	-0.186906	0.99404	-0.675422	-0.410868	-0.633629	1.15311	-0.352862	-0.286291	-0.415274	-0.24059	-0.744757	-0.285821	-0.04494	-0.107337	-0.25707	-0.587358	-0.368261	-0.142814
-4.88007	1.5814	-0.707348	-0.231293	0.211706	-0.61533	0.680831	-0.28873	-0.664909	0.152774	0.213009	0.794163	-0.318486	0.209753	-0.818697	-0.364962	-0.0859004	-0.245635	-0.43286	-0.481564	-0.247106	0.305827	-0.377605	-0.702903	0.104837	-0.269048	-0.207198	-0.299751	-0.188403	-0.187755	-0.408185	-0.335541	-0.186254	0.994186	-0.675559	-0.410539	-0.635065	1.15474	-0.350258	-0.287147	-0.415649	-0.242278	-0.743881	-0.285901	-0.0453466	-0.105159	-0.258107	-0.586203	-0.367616	-0.140793
-4.87909	1.58574	-0.707056	-0.231283	0.21101	-0.615108	0.682678	-0.287829	-0.663826	0.154337	0.215406	0.792066	-0.318354	0.212504	-0.817551	-0.365779	-0.0861504	-0.244719	-0.432687	-0.48106	-0.246299	0.304952	-0.376241	-0.703854	0.10379	-0.270596	-0.2078	-0.30128	-0.189685	-0.188882	-0.408628	-0.33513	-0.185593	0.994325	-0.675697	-0.410206	-0.636509	1.15637	-0.347653	-0.287985	-0.416028	-0.243969	-0.742997	-0.285986	-0.0457559	-0.102984	-0.259131	-0.585042	-0.366977	-0.138781
-4.8781	1.59008	-0.706759	-0.231266	0.210298	-0.614887	0.684514	-0.286907	-0.662743	0.155899	0.21782	0.789955	-0.318198	0.215273	-0.816394	-0.366581	-0.0864047	-0.243805	-0.432508	-0.480558	-0.245497	0.304082	-0.374865	-0.704794	0.102741	-0.27213	-0.208413	-0.302803	-0.190973	-0.190028	-0.409065	-0.334699	-0.184923	0.994458	-0.675837	-0.409869	-0.63796	1.15799	-0.345046	-0.288807	-0.416411	-0.245663	-0.742107	-0.286077	-0.0461681	-0.100814	-0.260143	-0.583874	-0.366344	-0.13678
-4.87712	1.59442	-0.706457	-0.231245	0.209573	-0.614666	0.68634	-0.285962	-0.661661	0.157463	0.220253	0.787833	-0.318018	0.21806	-0.815225	-0.367368	-0.0866633	-0.242891	-0.432324	-0.480056	-0.244699	0.303217	-0.373477	-0.705724	0.101692	-0.273651	-0.209036	-0.30432	-0.192265	-0.191193	-0.409497	-0.334247	-0.184244	0.994585	-0.675979	-0.409528	-0.639418	1.1596	-0.342439	-0.289611	-0.416796	-0.24736	-0.74121	-0.286174	-0.046583	-0.098648	-0.261144	-0.5827	-0.365719	-0.134789
-4.87614	1.59877	-0.706149	-0.231218	0.208833	-0.614448	0.688156	-0.284997	-0.660578	0.159027	0.222704	0.785698	-0.317814	0.220865	-0.814046	-0.36814	-0.0869263	-0.241979	-0.432133	-0.479556	-0.243905	0.302357	-0.372078	-0.706643	0.100642	-0.275158	-0.20967	-0.305832	-0.193563	-0.192377	-0.409924	-0.333775	-0.183557	0.994705	-0.676123	-0.409182	-0.640882	1.16121	-0.33983	-0.290398	-0.417185	-0.249061	-0.740307	-0.286277	-0.0470008	-0.0964866	-0.262132	-0.581519	-0.365101	-0.132808
-4.87515	1.60312	-0.705836	-0.231186	0.208079	-0.61423	0.689961	-0.28401	-0.659496	0.160591	0.225173	0.78355	-0.317587	0.223687	-0.812856	-0.368896	-0.0871937	-0.241068	-0.431937	-0.479056	-0.243115	0.301503	-0.370666	-0.707551	0.0995903	-0.276651	-0.210315	-0.307337	-0.194865	-0.19358	-0.410344	-0.333281	-0.182861	0.994818	-0.676269	-0.408833	-0.642354	1.16282	-0.337221	-0.291167	-0.417578	-0.250764	-0.739398	-0.286387	-0.0474214	-0.0943301	-0.263108	-0.580332	-0.36449	-0.130838
-4.87417	1.60748	-0.705517	-0.231148	0.207311	-0.614013	0.691756	-0.283002	-0.658414	0.162155	0.227659	0.781392	-0.317335	0.226526	-0.811655	-0.369636	-0.0874654	-0.240157	-0.431736	-0.478558	-0.242329	0.300654	-0.369242	-0.708448	0.0985382	-0.278131	-0.210969	-0.308835	-0.196172	-0.194801	-0.410759	-0.332768	-0.182156	0.994925	-0.676418	-0.40848	-0.643832	1.16441	-0.334611	-0.291918	-0.417974	-0.25247	-0.738484	-0.286502	-0.0478448	-0.0921784	-0.264071	-0.579138	-0.363887	-0.128879
-4.87319	1.61184	-0.705193	-0.231104	0.206528	-0.613798	0.69354	-0.281973	-0.657333	0.163721	0.230164	0.779221	-0.31706	0.229382	-0.810443	-0.370361	-0.0877415	-0.239249	-0.431528	-0.478062	-0.241548	0.29981	-0.367806	-0.709334	0.0974852	-0.279596	-0.211634	-0.310327	-0.197485	-0.196041	-0.411168	-0.332234	-0.181443	0.995025	-0.676568	-0.408122	-0.645316	1.166	-0.332001	-0.292652	-0.418373	-0.254178	-0.737563	-0.286623	-0.0482711	-0.0900319	-0.265022	-0.577938	-0.36329	-0.12693
-4.8722	1.6162	-0.704864	-0.231054	0.205732	-0.613585	0.695313	-0.280924	-0.656253	0.165286	0.232686	0.77704	-0.316761	0.232254	-0.80922	-0.371069	-0.0880221	-0.238341	-0.431315	-0.477567	-0.240771	0.298971	-0.366358	-0.71021	0.0964314	-0.281047	-0.212309	-0.311812	-0.198802	-0.1973	-0.411572	-0.33168	-0.180722	0.995117	-0.67672	-0.407761	-0.646807	1.16759	-0.329392	-0.293367	-0.418776	-0.25589	-0.736637	-0.28675	-0.0487003	-0.0878906	-0.265961	-0.576731	-0.362701	-0.124992
-4.87122	1.62055	-0.70453	-0.230998	0.204921	-0.613373	0.697075	-0.279854	-0.655174	0.166852	0.235227	0.774847	-0.316439	0.235143	-0.807987	-0.371762	-0.088307	-0.237435	-0.431096	-0.477074	-0.239999	0.298138	-0.364898	-0.711074	0.0953767	-0.282484	-0.212994	-0.313291	-0.200124	-0.198577	-0.41197	-0.331106	-0.179994	0.995203	-0.676874	-0.407395	-0.648304	1.16916	-0.326782	-0.294065	-0.419181	-0.257603	-0.735705	-0.286884	-0.0491324	-0.0857548	-0.266887	-0.575518	-0.362119	-0.123066
-4.87024	1.62492	-0.70419	-0.230937	0.204096	-0.613162	0.698825	-0.278764	-0.654095	0.168419	0.237784	0.772644	-0.316094	0.238047	-0.806743	-0.372438	-0.0885964	-0.23653	-0.430872	-0.476582	-0.239231	0.29731	-0.363427	-0.711927	0.0943212	-0.283906	-0.213688	-0.314762	-0.201451	-0.199873	-0.412362	-0.330512	-0.179257	0.995281	-0.677031	-0.407025	-0.649808	1.17074	-0.324174	-0.294744	-0.419591	-0.259318	-0.734769	-0.287023	-0.0495675	-0.0836247	-0.267801	-0.574298	-0.361545	-0.12115
-4.86926	1.62928	-0.703846	-0.230869	0.203257	-0.612953	0.700564	-0.277654	-0.653018	0.169986	0.24036	0.770431	-0.315725	0.240967	-0.805488	-0.373098	-0.0888902	-0.235627	-0.430641	-0.476093	-0.238468	0.296487	-0.361944	-0.712769	0.093265	-0.285314	-0.214393	-0.316226	-0.202783	-0.201187	-0.412748	-0.329899	-0.178513	0.995352	-0.677189	-0.406652	-0.651317	1.1723	-0.321566	-0.295405	-0.420003	-0.261036	-0.733827	-0.287169	-0.0500055	-0.0815005	-0.268702	-0.573071	-0.360979	-0.119246
-4.86827	1.63363	-0.703496	-0.230794	0.202405	-0.612745	0.702292	-0.276525	-0.651941	0.171554	0.242953	0.768208	-0.315334	0.243902	-0.804223	-0.373741	-0.0891885	-0.234725	-0.430405	-0.475605	-0.237709	0.29567	-0.360448	-0.7136	0.0922079	-0.286707	-0.215107	-0.317682	-0.204119	-0.20252	-0.413128	-0.329265	-0.177761	0.995415	-0.67735	-0.406274	-0.652832	1.17386	-0.31896	-0.296048	-0.420419	-0.262756	-0.73288	-0.287321	-0.0504464	-0.0793822	-0.26959	-0.571838	-0.36042	-0.117353
-4.86729	1.63799	-0.703141	-0.230713	0.201538	-0.61254	0.704008	-0.275376	-0.650866	0.173122	0.245563	0.765975	-0.31492	0.246851	-0.802948	-0.374368	-0.0894912	-0.233825	-0.430163	-0.47512	-0.236955	0.294858	-0.358941	-0.714419	0.0911502	-0.288085	-0.21583	-0.319131	-0.20546	-0.203871	-0.413502	-0.328613	-0.177002	0.99547	-0.677513	-0.405892	-0.654353	1.17541	-0.316355	-0.296672	-0.420838	-0.264477	-0.731929	-0.287479	-0.0508903	-0.0772702	-0.270466	-0.570598	-0.359869	-0.115472
-4.86631	1.64235	-0.702781	-0.230626	0.200658	-0.612336	0.705713	-0.274208	-0.649793	0.174691	0.248191	0.763733	-0.314483	0.249815	-0.801662	-0.374978	-0.0897984	-0.232926	-0.429916	-0.474637	-0.236205	0.294052	-0.357423	-0.715227	0.0900917	-0.289448	-0.216563	-0.320572	-0.206806	-0.20524	-0.41387	-0.327941	-0.176235	0.995518	-0.677678	-0.405506	-0.65588	1.17695	-0.313751	-0.297278	-0.42126	-0.2662	-0.730974	-0.287643	-0.0513372	-0.0751645	-0.271328	-0.569352	-0.359326	-0.113602
-4.86532	1.6467	-0.702416	-0.230532	0.199764	-0.612133	0.707405	-0.27302	-0.64872	0.176261	0.250836	0.761482	-0.314024	0.252794	-0.800366	-0.37557	-0.0901101	-0.232029	-0.429662	-0.474157	-0.23546	0.293251	-0.355892	-0.716023	0.0890324	-0.290796	-0.217305	-0.322004	-0.208156	-0.206627	-0.414232	-0.32725	-0.175461	0.995557	-0.677845	-0.405116	-0.657412	1.17849	-0.31115	-0.297865	-0.421685	-0.267925	-0.730014	-0.287813	-0.0517871	-0.0730654	-0.272178	-0.568099	-0.358791	-0.111744
-4.86434	1.65105	-0.702046	-0.230431	0.198856	-0.611933	0.709086	-0.271814	-0.647649	0.177831	0.253498	0.759222	-0.313543	0.255786	-0.79906	-0.376146	-0.0904264	-0.231134	-0.429403	-0.473679	-0.23472	0.292456	-0.35435	-0.716808	0.0879725	-0.292129	-0.218057	-0.323429	-0.209511	-0.208032	-0.414588	-0.326539	-0.174681	0.995589	-0.678015	-0.404721	-0.658949	1.18002	-0.308551	-0.298434	-0.422114	-0.269651	-0.72905	-0.287989	-0.0522401	-0.070973	-0.273015	-0.566839	-0.358263	-0.109898
-4.86336	1.6554	-0.701671	-0.230324	0.197934	-0.611734	0.710754	-0.27059	-0.64658	0.179401	0.256177	0.756954	-0.313039	0.258792	-0.797743	-0.376704	-0.0907471	-0.230241	-0.429138	-0.473204	-0.233985	0.291667	-0.352797	-0.717581	0.0869119	-0.293446	-0.218817	-0.324845	-0.210871	-0.209456	-0.414938	-0.32581	-0.173893	0.995613	-0.678187	-0.404323	-0.660492	1.18155	-0.305954	-0.298983	-0.422545	-0.271379	-0.728082	-0.288171	-0.052696	-0.0688876	-0.273838	-0.565572	-0.357744	-0.108063
-4.86237	1.65975	-0.701291	-0.23021	0.196999	-0.611538	0.71241	-0.269347	-0.645513	0.180972	0.258873	0.754677	-0.312513	0.26181	-0.796417	-0.377244	-0.0910723	-0.229349	-0.428867	-0.472731	-0.233254	0.290883	-0.351232	-0.718342	0.0858506	-0.294748	-0.219587	-0.326252	-0.212235	-0.210897	-0.415282	-0.325063	-0.173099	0.995628	-0.678362	-0.40392	-0.66204	1.18306	-0.30336	-0.299514	-0.42298	-0.273108	-0.72711	-0.28836	-0.0531549	-0.0668093	-0.274649	-0.564299	-0.357233	-0.106241
-4.86139	1.66408	-0.700906	-0.230088	0.19605	-0.611343	0.714054	-0.268086	-0.644447	0.182544	0.261586	0.752392	-0.311965	0.264842	-0.79508	-0.377767	-0.0914021	-0.22846	-0.42859	-0.472262	-0.232529	0.290105	-0.349655	-0.719092	0.0847887	-0.296034	-0.220365	-0.327651	-0.213603	-0.212356	-0.41562	-0.324296	-0.172298	0.995635	-0.678538	-0.403514	-0.663592	1.18457	-0.300769	-0.300026	-0.423418	-0.274837	-0.726135	-0.288555	-0.0536169	-0.0647383	-0.275447	-0.563019	-0.356729	-0.104431
-4.86041	1.66842	-0.700516	-0.229959	0.195088	-0.611151	0.715685	-0.266807	-0.643384	0.184116	0.264315	0.7501	-0.311396	0.267886	-0.793734	-0.378273	-0.0917365	-0.227572	-0.428307	-0.471795	-0.231808	0.289332	-0.348067	-0.719829	0.0837262	-0.297305	-0.221152	-0.32904	-0.214976	-0.213833	-0.415952	-0.323512	-0.17149	0.995633	-0.678717	-0.403103	-0.66515	1.18608	-0.298181	-0.300519	-0.423859	-0.276568	-0.725156	-0.288756	-0.054082	-0.0626747	-0.276231	-0.561732	-0.356235	-0.102633
-4.85943	1.67275	-0.700121	-0.229824	0.194112	-0.61096	0.717304	-0.265511	-0.642322	0.185688	0.267062	0.7478	-0.310805	0.270942	-0.792378	-0.37876	-0.0920754	-0.226686	-0.428019	-0.471332	-0.231092	0.288565	-0.346467	-0.720555	0.082663	-0.298559	-0.221947	-0.330421	-0.216353	-0.215328	-0.416277	-0.322709	-0.170677	0.995623	-0.678899	-0.402688	-0.666712	1.18757	-0.295596	-0.300993	-0.424303	-0.2783	-0.724174	-0.288963	-0.0545501	-0.0606188	-0.277002	-0.560438	-0.355748	-0.100848
-4.85844	1.67707	-0.699722	-0.229681	0.193123	-0.610772	0.71891	-0.264197	-0.641263	0.187262	0.269824	0.745494	-0.310193	0.27401	-0.791012	-0.379229	-0.0924189	-0.225803	-0.427724	-0.470872	-0.230381	0.287804	-0.344857	-0.721269	0.0815992	-0.299798	-0.222751	-0.331792	-0.217735	-0.21684	-0.416597	-0.321888	-0.169857	0.995603	-0.679082	-0.402269	-0.668278	1.18906	-0.293015	-0.301447	-0.424751	-0.280032	-0.723189	-0.289177	-0.0550212	-0.0585707	-0.27776	-0.559137	-0.35527	-0.099075
-4.85746	1.68138	-0.699318	-0.22953	0.192121	-0.610585	0.720503	-0.262866	-0.640206	0.188836	0.272604	0.74318	-0.30956	0.277089	-0.789636	-0.379681	-0.0927669	-0.224921	-0.427424	-0.470416	-0.229675	0.287049	-0.343234	-0.72197	0.0805348	-0.301021	-0.223564	-0.333153	-0.21912	-0.218369	-0.41691	-0.321049	-0.16903	0.995576	-0.679269	-0.401845	-0.669849	1.19054	-0.290438	-0.301883	-0.425201	-0.281765	-0.722201	-0.289397	-0.0554954	-0.0565306	-0.278505	-0.557829	-0.3548	-0.0973146
-4.85648	1.68569	-0.698909	-0.229372	0.191105	-0.610401	0.722083	-0.261519	-0.639151	0.19041	0.275399	0.74086	-0.308906	0.280179	-0.788251	-0.380114	-0.0931196	-0.224042	-0.427118	-0.469962	-0.228973	0.286299	-0.341601	-0.72266	0.0794699	-0.302227	-0.224384	-0.334505	-0.22051	-0.219916	-0.417217	-0.320192	-0.168198	0.995539	-0.679457	-0.401418	-0.671424	1.19201	-0.287866	-0.302299	-0.425654	-0.283498	-0.721211	-0.289623	-0.0559727	-0.0544987	-0.279236	-0.556515	-0.354339	-0.0955669
-4.85549	1.68999	-0.698495	-0.229207	0.190077	-0.610219	0.72365	-0.260155	-0.638098	0.191985	0.278211	0.738534	-0.30823	0.283279	-0.786856	-0.380528	-0.0934769	-0.223165	-0.426806	-0.469513	-0.228277	0.285555	-0.339956	-0.723337	0.0784044	-0.303417	-0.225213	-0.335847	-0.221905	-0.221481	-0.417517	-0.319317	-0.16736	0.995493	-0.679649	-0.400986	-0.673003	1.19348	-0.285297	-0.302696	-0.42611	-0.285232	-0.720218	-0.289855	-0.0564531	-0.0524751	-0.279954	-0.555193	-0.353886	-0.0938319
-4.85451	1.69428	-0.698077	-0.229033	0.189035	-0.61004	0.725204	-0.258775	-0.637049	0.19356	0.281039	0.736202	-0.307535	0.28639	-0.785452	-0.380925	-0.0938388	-0.22229	-0.426488	-0.469067	-0.227585	0.284817	-0.3383	-0.724002	0.0773383	-0.304591	-0.22605	-0.337178	-0.223303	-0.223062	-0.417812	-0.318425	-0.166517	0.995437	-0.679842	-0.400551	-0.674586	1.19494	-0.282734	-0.303073	-0.42657	-0.286966	-0.719222	-0.290094	-0.0569365	-0.05046	-0.280659	-0.553864	-0.353442	-0.0921097
-4.85353	1.69856	-0.697654	-0.228852	0.18798	-0.609862	0.726745	-0.257379	-0.636001	0.195136	0.283882	0.733864	-0.306819	0.289511	-0.784039	-0.381302	-0.0942054	-0.221418	-0.426164	-0.468625	-0.226899	0.284084	-0.336633	-0.724655	0.0762716	-0.305748	-0.226894	-0.3385	-0.224706	-0.224661	-0.4181	-0.317516	-0.165667	0.995373	-0.680039	-0.400111	-0.676173	1.19639	-0.280175	-0.303431	-0.427032	-0.2887	-0.718225	-0.290338	-0.057423	-0.0484537	-0.28135	-0.552528	-0.353007	-0.0904004
-4.85254	1.70283	-0.697226	-0.228664	0.186912	-0.609687	0.728272	-0.255967	-0.634957	0.196713	0.286742	0.73152	-0.306082	0.292641	-0.782616	-0.381661	-0.0945766	-0.220547	-0.425834	-0.468187	-0.226218	0.283358	-0.334955	-0.725295	0.0752045	-0.306889	-0.227747	-0.339811	-0.226112	-0.226276	-0.418382	-0.31659	-0.164812	0.995299	-0.680237	-0.399666	-0.677763	1.19783	-0.277621	-0.30377	-0.427497	-0.290433	-0.717225	-0.29059	-0.0579126	-0.0464562	-0.282028	-0.551186	-0.35258	-0.0887041
-4.85156	1.70709	-0.696794	-0.228467	0.185832	-0.609515	0.729786	-0.25454	-0.633915	0.19829	0.289617	0.729172	-0.305326	0.29578	-0.781184	-0.382001	-0.0949525	-0.219679	-0.425498	-0.467754	-0.225541	0.282637	-0.333265	-0.725923	0.0741368	-0.308013	-0.228607	-0.341111	-0.227523	-0.227909	-0.418658	-0.315646	-0.163952	0.995216	-0.680439	-0.399218	-0.679357	1.19927	-0.275073	-0.304089	-0.427966	-0.292167	-0.716224	-0.290847	-0.0584052	-0.0444678	-0.282692	-0.549835	-0.352162	-0.087021
-4.85058	1.71134	-0.696357	-0.228262	0.184738	-0.609345	0.731286	-0.253098	-0.632876	0.199867	0.292508	0.726819	-0.30455	0.298928	-0.779743	-0.382322	-0.0953331	-0.218814	-0.425157	-0.467324	-0.22487	0.281922	-0.331565	-0.726539	0.0730686	-0.30912	-0.229474	-0.3424	-0.228937	-0.229558	-0.418927	-0.314686	-0.163087	0.995123	-0.680642	-0.398766	-0.680954	1.20069	-0.27253	-0.304388	-0.428437	-0.293901	-0.71522	-0.291111	-0.0589009	-0.0424886	-0.283343	-0.548478	-0.351753	-0.085351
-4.84959	1.71558	-0.695916	-0.22805	0.183632	-0.609177	0.732773	-0.25164	-0.63184	0.201446	0.295414	0.724461	-0.303754	0.302084	-0.778294	-0.382624	-0.0957184	-0.217951	-0.424809	-0.466899	-0.224203	0.281213	-0.329854	-0.727142	0.0719999	-0.31021	-0.230349	-0.343679	-0.230356	-0.231224	-0.41919	-0.313709	-0.162216	0.99502	-0.680849	-0.398309	-0.682554	1.20211	-0.269993	-0.304668	-0.428911	-0.295634	-0.714216	-0.291381	-0.0593997	-0.0405188	-0.28398	-0.547114	-0.351353	-0.0836942
-4.84861	1.71981	-0.695471	-0.227829	0.182514	-0.609012	0.734245	-0.250168	-0.630807	0.203024	0.298335	0.722099	-0.302938	0.305248	-0.776835	-0.382907	-0.0961083	-0.217091	-0.424456	-0.466478	-0.223541	0.280509	-0.328132	-0.727732	0.0709307	-0.311283	-0.23123	-0.344946	-0.231778	-0.232907	-0.419447	-0.312716	-0.161341	0.994907	-0.681058	-0.397848	-0.684157	1.20352	-0.267463	-0.304928	-0.429388	-0.297366	-0.71321	-0.291657	-0.0599016	-0.0385586	-0.284604	-0.545742	-0.350962	-0.0820507
-4.84763	1.72403	-0.695021	-0.2276	0.181382	-0.608849	0.735704	-0.248682	-0.629778	0.204603	0.301272	0.719733	-0.302104	0.30842	-0.775368	-0.383171	-0.096503	-0.216233	-0.424097	-0.466061	-0.222885	0.279812	-0.326399	-0.728309	0.069861	-0.31234	-0.232119	-0.346202	-0.233204	-0.234606	-0.419698	-0.311706	-0.16046	0.994785	-0.68127	-0.397383	-0.685762	1.20493	-0.264938	-0.305169	-0.429868	-0.299098	-0.712202	-0.29194	-0.0604066	-0.0366081	-0.285214	-0.544363	-0.35058	-0.0804207
-4.84665	1.72823	-0.694567	-0.227363	0.180239	-0.608689	0.737149	-0.247182	-0.628751	0.206183	0.304223	0.717363	-0.30125	0.311598	-0.773892	-0.383415	-0.0969024	-0.215378	-0.423731	-0.46565	-0.222233	0.279121	-0.324655	-0.728874	0.0687908	-0.313378	-0.233015	-0.347446	-0.234634	-0.236321	-0.419942	-0.31068	-0.159575	0.994652	-0.681484	-0.396914	-0.687371	1.20632	-0.26242	-0.305389	-0.43035	-0.30083	-0.711194	-0.292229	-0.0609146	-0.0346675	-0.28581	-0.542976	-0.350207	-0.0788041
-4.84566	1.73242	-0.694108	-0.227117	0.179083	-0.608531	0.73858	-0.245668	-0.627728	0.207763	0.307189	0.714989	-0.300378	0.314784	-0.772407	-0.38364	-0.0973066	-0.214525	-0.42336	-0.465243	-0.221587	0.278435	-0.322901	-0.729426	0.0677201	-0.3144	-0.233918	-0.348678	-0.236068	-0.238053	-0.42018	-0.309639	-0.158685	0.994509	-0.681701	-0.396441	-0.688982	1.20771	-0.259909	-0.30559	-0.430836	-0.30256	-0.710185	-0.292524	-0.0614256	-0.032737	-0.286393	-0.541582	-0.349843	-0.0772011
-4.84468	1.73659	-0.693645	-0.226864	0.177914	-0.608376	0.739997	-0.244141	-0.626708	0.209343	0.310171	0.712612	-0.299486	0.317976	-0.770914	-0.383845	-0.0977155	-0.213675	-0.422983	-0.464841	-0.220945	0.277755	-0.321135	-0.729965	0.066649	-0.315404	-0.234827	-0.349899	-0.237505	-0.2398	-0.420412	-0.308581	-0.15779	0.994356	-0.681921	-0.395963	-0.690595	1.20909	-0.257405	-0.305772	-0.431324	-0.30429	-0.709175	-0.292826	-0.0619397	-0.0308168	-0.286963	-0.540181	-0.349488	-0.0756116
-4.8437	1.74075	-0.693178	-0.226601	0.176734	-0.608224	0.741399	-0.2426	-0.625692	0.210924	0.313166	0.710233	-0.298577	0.321173	-0.769413	-0.384031	-0.0981292	-0.212828	-0.4226	-0.464443	-0.220308	0.277081	-0.31936	-0.730491	0.0655774	-0.316391	-0.235743	-0.351107	-0.238946	-0.241564	-0.420638	-0.307508	-0.156891	0.994193	-0.682143	-0.395481	-0.69221	1.21046	-0.254908	-0.305933	-0.431815	-0.306018	-0.708165	-0.293134	-0.0624568	-0.0289069	-0.287518	-0.538772	-0.349142	-0.0740359
-4.84271	1.7449	-0.692707	-0.22633	0.175541	-0.608074	0.742787	-0.241047	-0.624679	0.212505	0.316176	0.70785	-0.297649	0.324376	-0.767903	-0.384197	-0.0985476	-0.211984	-0.422211	-0.464051	-0.219676	0.276414	-0.317573	-0.731004	0.0645054	-0.31736	-0.236665	-0.352303	-0.24039	-0.243344	-0.420857	-0.306419	-0.155988	0.994019	-0.682368	-0.394995	-0.693828	1.21182	-0.252418	-0.306075	-0.432309	-0.307745	-0.707154	-0.293449	-0.062977	-0.0270077	-0.28806	-0.537356	-0.348806	-0.0724739
-4.84173	1.74903	-0.692232	-0.226051	0.174337	-0.607927	0.744161	-0.239481	-0.62367	0.214087	0.3192	0.705465	-0.296704	0.327584	-0.766386	-0.384343	-0.0989709	-0.211143	-0.421816	-0.463664	-0.219049	0.275752	-0.315777	-0.731504	0.0634329	-0.318312	-0.237594	-0.353486	-0.241838	-0.245139	-0.42107	-0.305315	-0.15508	0.993834	-0.682596	-0.394505	-0.695447	1.21317	-0.249936	-0.306196	-0.432806	-0.309471	-0.706143	-0.29377	-0.0635002	-0.0251192	-0.288589	-0.535932	-0.348479	-0.0709257
-4.84075	1.75314	-0.691752	-0.225763	0.17312	-0.607783	0.74552	-0.237903	-0.622665	0.215669	0.322238	0.703078	-0.29574	0.330797	-0.76486	-0.384469	-0.0993989	-0.210304	-0.421415	-0.463283	-0.218427	0.275096	-0.313969	-0.731991	0.0623599	-0.319246	-0.238529	-0.354657	-0.24329	-0.24695	-0.421277	-0.304196	-0.154168	0.993639	-0.682826	-0.394011	-0.697067	1.21452	-0.247462	-0.306298	-0.433305	-0.311195	-0.705133	-0.294097	-0.0640264	-0.0232416	-0.289103	-0.5345	-0.348161	-0.0693914
-4.83976	1.75724	-0.691269	-0.225466	0.171892	-0.607642	0.746865	-0.236313	-0.621663	0.217251	0.32529	0.700689	-0.294759	0.334014	-0.763326	-0.384575	-0.0998318	-0.209468	-0.421008	-0.462906	-0.21781	0.274445	-0.312152	-0.732465	0.0612865	-0.320162	-0.239469	-0.355815	-0.244744	-0.248776	-0.421477	-0.303062	-0.153253	0.993433	-0.68306	-0.393512	-0.698689	1.21585	-0.244996	-0.30638	-0.433807	-0.312918	-0.704122	-0.294431	-0.0645556	-0.0213751	-0.289604	-0.53306	-0.347853	-0.067871
-4.83878	1.76132	-0.690781	-0.225161	0.170652	-0.607503	0.748195	-0.234711	-0.620666	0.218834	0.328356	0.698298	-0.293761	0.337235	-0.761785	-0.384662	-0.100269	-0.208636	-0.420596	-0.462536	-0.217198	0.273801	-0.310324	-0.732926	0.0602127	-0.32106	-0.240416	-0.35696	-0.246203	-0.250618	-0.421671	-0.301913	-0.152333	0.993217	-0.683296	-0.393009	-0.700313	1.21718	-0.242539	-0.306442	-0.434312	-0.31464	-0.703111	-0.294771	-0.0650878	-0.0195198	-0.290091	-0.531613	-0.347555	-0.0663645
-4.8378	1.76538	-0.69029	-0.224847	0.169401	-0.607367	0.74951	-0.233098	-0.619672	0.220417	0.331436	0.695905	-0.292746	0.34046	-0.760236	-0.384728	-0.100712	-0.207806	-0.420177	-0.46217	-0.216591	0.273163	-0.308485	-0.733373	0.0591384	-0.32194	-0.241368	-0.358092	-0.247664	-0.252475	-0.42186	-0.300749	-0.151409	0.992989	-0.683535	-0.392503	-0.701937	1.2185	-0.24009	-0.306485	-0.43482	-0.316359	-0.702101	-0.295117	-0.065623	-0.017676	-0.290565	-0.530158	-0.347265	-0.0648721
-4.83682	1.76942	-0.689794	-0.224523	0.168137	-0.607234	0.750811	-0.231474	-0.618682	0.222	0.334529	0.693511	-0.291714	0.343687	-0.758679	-0.384774	-0.101159	-0.206979	-0.419752	-0.461811	-0.215988	0.272531	-0.306637	-0.733808	0.0580637	-0.322802	-0.242325	-0.35921	-0.249129	-0.254347	-0.422041	-0.299572	-0.150482	0.99275	-0.683776	-0.391991	-0.703563	1.21981	-0.23765	-0.306507	-0.43533	-0.318077	-0.701092	-0.29547	-0.0661612	-0.0158437	-0.291025	-0.528695	-0.346986	-0.0633938
-4.83583	1.77345	-0.689295	-0.224192	0.166863	-0.607103	0.752097	-0.229839	-0.617697	0.223584	0.337635	0.691117	-0.290665	0.346917	-0.757115	-0.3848	-0.101612	-0.206156	-0.419322	-0.461457	-0.21539	0.271904	-0.304778	-0.734228	0.0569885	-0.323646	-0.243288	-0.360315	-0.250597	-0.256234	-0.422217	-0.29838	-0.149551	0.992501	-0.684021	-0.391476	-0.705189	1.22111	-0.235218	-0.30651	-0.435843	-0.319793	-0.700083	-0.295829	-0.0667022	-0.0140232	-0.291471	-0.527225	-0.346715	-0.0619297
-4.83485	1.77745	-0.688792	-0.223851	0.165577	-0.606976	0.753367	-0.228194	-0.616715	0.225168	0.340754	0.688721	-0.2896	0.350149	-0.755543	-0.384805	-0.102069	-0.205335	-0.418885	-0.461109	-0.214797	0.271284	-0.30291	-0.734636	0.0559129	-0.324472	-0.244257	-0.361406	-0.252068	-0.258135	-0.422387	-0.297173	-0.148617	0.99224	-0.684268	-0.390957	-0.706816	1.2224	-0.232796	-0.306492	-0.436358	-0.321507	-0.699075	-0.296195	-0.0672463	-0.0122145	-0.291904	-0.525746	-0.346455	-0.0604797
-4.83387	1.78144	-0.688285	-0.223501	0.16428	-0.606851	0.754623	-0.226538	-0.615738	0.226752	0.343886	0.686325	-0.288519	0.353382	-0.753964	-0.38479	-0.102531	-0.204518	-0.418443	-0.460767	-0.214209	0.270669	-0.301031	-0.73503	0.0548369	-0.32528	-0.24523	-0.362484	-0.253542	-0.260052	-0.422551	-0.295953	-0.147679	0.991967	-0.684518	-0.390433	-0.708443	1.22368	-0.230383	-0.306455	-0.436876	-0.323219	-0.698068	-0.296567	-0.0677932	-0.0104179	-0.292323	-0.524259	-0.346204	-0.0590439
-4.83288	1.7854	-0.687774	-0.223142	0.162972	-0.606729	0.755864	-0.224873	-0.614765	0.228336	0.34703	0.683929	-0.287422	0.356617	-0.752378	-0.384755	-0.102998	-0.203703	-0.417994	-0.460431	-0.213625	0.27006	-0.299143	-0.73541	0.0537604	-0.326069	-0.246208	-0.363547	-0.255019	-0.261983	-0.422708	-0.29472	-0.146738	0.991684	-0.684771	-0.389905	-0.710071	1.22496	-0.22798	-0.306398	-0.437397	-0.324928	-0.697062	-0.296945	-0.068343	-0.00863348	-0.292729	-0.522764	-0.345963	-0.0576225
-4.8319	1.78934	-0.68726	-0.222774	0.161653	-0.60661	0.757089	-0.223199	-0.613797	0.229921	0.350188	0.681533	-0.286309	0.359853	-0.750785	-0.384699	-0.103469	-0.202892	-0.41754	-0.460101	-0.213047	0.269458	-0.297244	-0.735777	0.0526835	-0.32684	-0.247192	-0.364596	-0.256499	-0.263928	-0.422859	-0.293473	-0.145794	0.991389	-0.685027	-0.389373	-0.711698	1.22622	-0.225587	-0.306322	-0.43792	-0.326635	-0.696058	-0.29733	-0.0688957	-0.00686144	-0.29312	-0.521261	-0.345731	-0.0562153
-4.83092	1.79327	-0.686742	-0.222397	0.160323	-0.606494	0.7583	-0.221515	-0.612833	0.231505	0.353357	0.679137	-0.285181	0.363089	-0.749185	-0.384623	-0.103946	-0.202085	-0.41708	-0.459777	-0.212472	0.268861	-0.295336	-0.73613	0.0516062	-0.327593	-0.248179	-0.36563	-0.257982	-0.265888	-0.423005	-0.292212	-0.144846	0.991082	-0.685286	-0.388837	-0.713325	1.22748	-0.223204	-0.306225	-0.438446	-0.32834	-0.695055	-0.297721	-0.0694513	-0.00510191	-0.293498	-0.51975	-0.34551	-0.0548225
-4.82993	1.79717	-0.686221	-0.222011	0.158982	-0.606381	0.759495	-0.219822	-0.611873	0.23309	0.356539	0.676741	-0.284037	0.366326	-0.747578	-0.384526	-0.104428	-0.20128	-0.416613	-0.459459	-0.211903	0.26827	-0.293418	-0.73647	0.0505284	-0.328327	-0.249172	-0.366651	-0.259468	-0.267861	-0.423144	-0.290939	-0.143896	0.990764	-0.685547	-0.388297	-0.714952	1.22872	-0.220831	-0.306109	-0.438975	-0.330042	-0.694054	-0.298119	-0.0700097	-0.00335506	-0.293863	-0.51823	-0.345298	-0.0534441
-4.82895	1.80105	-0.685696	-0.221615	0.15763	-0.60627	0.760674	-0.218121	-0.610918	0.234675	0.359732	0.674346	-0.282879	0.369561	-0.745965	-0.384409	-0.104914	-0.200479	-0.416141	-0.459148	-0.211337	0.267685	-0.29149	-0.736796	0.0494502	-0.329042	-0.250168	-0.367656	-0.260956	-0.269849	-0.423278	-0.289652	-0.142943	0.990434	-0.685812	-0.387752	-0.716579	1.22996	-0.218468	-0.305972	-0.439505	-0.331741	-0.693054	-0.298523	-0.0705709	-0.00162103	-0.294214	-0.516702	-0.345096	-0.0520801
-4.82797	1.8049	-0.685167	-0.221211	0.156268	-0.606163	0.761839	-0.216411	-0.609968	0.236259	0.362938	0.671952	-0.281706	0.372796	-0.744344	-0.384271	-0.105406	-0.199681	-0.415663	-0.458844	-0.210777	0.267106	-0.289553	-0.737108	0.0483715	-0.329739	-0.251169	-0.368646	-0.262448	-0.27185	-0.423405	-0.288353	-0.141986	0.990092	-0.68608	-0.387203	-0.718205	1.23119	-0.216116	-0.305816	-0.440039	-0.333438	-0.692057	-0.298933	-0.0711349	0.000100017	-0.294551	-0.515166	-0.344904	-0.0507306
-4.82698	1.80874	-0.684635	-0.220797	0.154896	-0.606059	0.762988	-0.214694	-0.609022	0.237844	0.366155	0.669559	-0.280519	0.376029	-0.742718	-0.384112	-0.105902	-0.198887	-0.415179	-0.458546	-0.210221	0.266532	-0.287606	-0.737406	0.0472923	-0.330418	-0.252174	-0.369622	-0.263942	-0.273865	-0.423527	-0.287041	-0.141027	0.989738	-0.68635	-0.38665	-0.71983	1.23241	-0.213775	-0.305641	-0.440575	-0.335131	-0.691061	-0.29935	-0.0717017	0.00180793	-0.294875	-0.513621	-0.344721	-0.0493955
-4.826	1.81255	-0.6841	-0.220374	0.153513	-0.605957	0.764121	-0.212969	-0.608081	0.239429	0.369383	0.667167	-0.279317	0.379261	-0.741085	-0.383932	-0.106404	-0.198096	-0.414689	-0.458254	-0.209669	0.265965	-0.28565	-0.737691	0.0462127	-0.331077	-0.253183	-0.370582	-0.265438	-0.275894	-0.423642	-0.285716	-0.140066	0.989372	-0.686623	-0.386093	-0.721454	1.23361	-0.211444	-0.305446	-0.441113	-0.336822	-0.690068	-0.299773	-0.0722712	0.00350257	-0.295186	-0.512068	-0.344549	-0.048075
-4.82502	1.81633	-0.683561	-0.219942	0.152119	-0.605859	0.765239	-0.211237	-0.607145	0.241014	0.372622	0.664777	-0.278102	0.382491	-0.739446	-0.383732	-0.10691	-0.197308	-0.414194	-0.45797	-0.209121	0.265403	-0.283684	-0.737962	0.0451327	-0.331718	-0.254196	-0.371526	-0.266937	-0.277936	-0.423752	-0.28438	-0.139102	0.988994	-0.6869	-0.385532	-0.723077	1.23481	-0.209125	-0.305231	-0.441654	-0.33851	-0.689077	-0.300203	-0.0728435	0.00518378	-0.295482	-0.510506	-0.344386	-0.046769
-4.82404	1.82009	-0.68302	-0.2195	0.150716	-0.605763	0.766342	-0.209498	-0.606214	0.242599	0.375873	0.662388	-0.276873	0.385717	-0.737801	-0.383511	-0.107422	-0.196524	-0.413692	-0.457692	-0.208578	0.264847	-0.281709	-0.738219	0.0440522	-0.33234	-0.255212	-0.372456	-0.268439	-0.279991	-0.423856	-0.283031	-0.138135	0.988604	-0.687179	-0.384967	-0.724698	1.236	-0.206818	-0.304996	-0.442197	-0.340195	-0.688089	-0.300639	-0.0734184	0.00685141	-0.295766	-0.508935	-0.344234	-0.0454776
-4.82305	1.82382	-0.682474	-0.219049	0.149303	-0.60567	0.767429	-0.207753	-0.605287	0.244183	0.379134	0.660002	-0.27563	0.388941	-0.73615	-0.383269	-0.107938	-0.195744	-0.413184	-0.457421	-0.20804	0.264297	-0.279725	-0.738461	0.0429711	-0.332943	-0.256232	-0.373369	-0.269943	-0.282059	-0.423955	-0.281671	-0.137166	0.988202	-0.687462	-0.384397	-0.726318	1.23718	-0.204522	-0.304742	-0.442743	-0.341876	-0.687103	-0.301082	-0.073996	0.00850532	-0.296036	-0.507356	-0.344091	-0.0442008
-4.82207	1.82753	-0.681926	-0.218589	0.14788	-0.605581	0.7685	-0.206001	-0.604366	0.245767	0.382406	0.657617	-0.274375	0.392161	-0.734493	-0.383006	-0.10846	-0.194967	-0.412671	-0.457157	-0.207505	0.263753	-0.277731	-0.73869	0.0418897	-0.333527	-0.257255	-0.374267	-0.271449	-0.28414	-0.424047	-0.280299	-0.136195	0.987788	-0.687747	-0.383823	-0.727936	1.23835	-0.202237	-0.304469	-0.443291	-0.343555	-0.68612	-0.301531	-0.0745763	0.0101454	-0.296292	-0.505767	-0.343959	-0.0429386
-4.82109	1.83122	-0.681375	-0.218119	0.146447	-0.605494	0.769555	-0.204243	-0.603449	0.247352	0.385688	0.655235	-0.273106	0.395377	-0.732831	-0.382722	-0.108986	-0.194193	-0.412152	-0.456899	-0.206975	0.263215	-0.275729	-0.738905	0.0408077	-0.334093	-0.258281	-0.375148	-0.272958	-0.286233	-0.424134	-0.278915	-0.135221	0.987361	-0.688035	-0.383245	-0.729552	1.23951	-0.199965	-0.304175	-0.443841	-0.345229	-0.68514	-0.301986	-0.0751592	0.0117714	-0.296535	-0.50417	-0.343836	-0.041691
-4.8201	1.83487	-0.68082	-0.21764	0.145004	-0.60541	0.770595	-0.20248	-0.602538	0.248936	0.38898	0.652856	-0.271825	0.398589	-0.731162	-0.382417	-0.109517	-0.193424	-0.411626	-0.456649	-0.206448	0.262682	-0.273717	-0.739106	0.0397252	-0.334639	-0.259311	-0.376014	-0.274469	-0.288339	-0.424216	-0.277521	-0.134246	0.986922	-0.688327	-0.382663	-0.731166	1.24066	-0.197705	-0.303863	-0.444394	-0.346901	-0.684163	-0.302448	-0.0757447	0.0133833	-0.296765	-0.502564	-0.343724	-0.0404581
-4.81912	1.8385	-0.680263	-0.217152	0.143552	-0.605329	0.771619	-0.200711	-0.601631	0.250519	0.392282	0.650479	-0.270532	0.401795	-0.729489	-0.382092	-0.110054	-0.192657	-0.411095	-0.456407	-0.205926	0.262155	-0.271697	-0.739293	0.0386422	-0.335167	-0.260343	-0.376863	-0.275982	-0.290458	-0.424292	-0.276115	-0.133268	0.986471	-0.688621	-0.382077	-0.732778	1.2418	-0.195457	-0.303531	-0.444949	-0.348569	-0.683189	-0.302916	-0.0763327	0.0149808	-0.296982	-0.500949	-0.343622	-0.0392398
-4.81814	1.8421	-0.679703	-0.216654	0.14209	-0.605251	0.772627	-0.198938	-0.60073	0.252103	0.395594	0.648106	-0.269226	0.404997	-0.72781	-0.381745	-0.110596	-0.191895	-0.410559	-0.456171	-0.205408	0.261634	-0.269667	-0.739465	0.0375587	-0.335675	-0.261378	-0.377695	-0.277497	-0.292588	-0.424362	-0.274698	-0.132288	0.986007	-0.688919	-0.381487	-0.734387	1.24293	-0.193221	-0.30318	-0.445506	-0.350233	-0.682218	-0.30339	-0.0769232	0.016564	-0.297185	-0.499324	-0.343529	-0.0380362
-4.81715	1.84568	-0.679139	-0.216147	0.140619	-0.605176	0.773619	-0.19716	-0.599834	0.253686	0.398915	0.645735	-0.267909	0.408192	-0.726126	-0.381378	-0.111142	-0.191136	-0.410016	-0.455942	-0.204894	0.261118	-0.267629	-0.739623	0.0364747	-0.336165	-0.262415	-0.378511	-0.279014	-0.294731	-0.424427	-0.27327	-0.131307	0.98553	-0.68922	-0.380893	-0.735993	1.24405	-0.190999	-0.30281	-0.446065	-0.351893	-0.681251	-0.303871	-0.0775163	0.0181325	-0.297375	-0.497691	-0.343447	-0.0368473
-4.81617	1.84922	-0.678573	-0.21563	0.139139	-0.605104	0.774596	-0.195377	-0.598943	0.255268	0.402246	0.643368	-0.26658	0.411381	-0.724437	-0.380989	-0.111694	-0.190381	-0.409467	-0.455721	-0.204383	0.260609	-0.265582	-0.739767	0.0353901	-0.336635	-0.263454	-0.379311	-0.280533	-0.296885	-0.424486	-0.271832	-0.130324	0.985041	-0.689523	-0.380294	-0.737597	1.24516	-0.188789	-0.30242	-0.446627	-0.35355	-0.680288	-0.304358	-0.0781118	0.0196864	-0.297552	-0.496048	-0.343375	-0.035673
-4.81519	1.85274	-0.678005	-0.215104	0.13765	-0.605035	0.775557	-0.193591	-0.598058	0.25685	0.405586	0.641005	-0.26524	0.414564	-0.722742	-0.38058	-0.11225	-0.18963	-0.408913	-0.455508	-0.203877	0.260105	-0.263527	-0.739897	0.034305	-0.337086	-0.264496	-0.380093	-0.282054	-0.299051	-0.42454	-0.270384	-0.129339	0.984539	-0.68983	-0.379691	-0.739197	1.24626	-0.186592	-0.302012	-0.447191	-0.355202	-0.679328	-0.304851	-0.0787097	0.0212254	-0.297715	-0.494396	-0.343313	-0.0345135
-4.81421	1.85623	-0.677433	-0.214569	0.136152	-0.604969	0.776501	-0.191801	-0.597177	0.258432	0.408935	0.638645	-0.263888	0.417739	-0.721044	-0.38015	-0.112812	-0.188882	-0.408353	-0.455301	-0.203374	0.259606	-0.261463	-0.740013	0.0332193	-0.337518	-0.26554	-0.380858	-0.283577	-0.301229	-0.424589	-0.268925	-0.128352	0.984024	-0.69014	-0.379085	-0.740794	1.24734	-0.184408	-0.301584	-0.447758	-0.356851	-0.678371	-0.305351	-0.07931	0.0227494	-0.297866	-0.492734	-0.343262	-0.0333686
-4.81322	1.85969	-0.676859	-0.214024	0.134645	-0.604906	0.77743	-0.190008	-0.596302	0.260013	0.412292	0.63629	-0.262527	0.420907	-0.71934	-0.379698	-0.113379	-0.188138	-0.407787	-0.455103	-0.202875	0.259113	-0.25939	-0.740114	0.0321331	-0.337931	-0.266586	-0.381606	-0.285101	-0.303418	-0.424632	-0.267457	-0.127364	0.983496	-0.690453	-0.378474	-0.742388	1.24842	-0.182238	-0.301137	-0.448326	-0.358496	-0.677419	-0.305858	-0.0799127	0.0242583	-0.298003	-0.491063	-0.34322	-0.0322385
-4.81224	1.86311	-0.676282	-0.21347	0.133129	-0.604845	0.778343	-0.188212	-0.595433	0.261593	0.415657	0.633938	-0.261154	0.424066	-0.717632	-0.379226	-0.113951	-0.187398	-0.407215	-0.454911	-0.202379	0.258626	-0.257309	-0.740201	0.0310462	-0.338325	-0.267633	-0.382337	-0.286627	-0.305618	-0.424671	-0.265979	-0.126374	0.982955	-0.690769	-0.377859	-0.743978	1.24949	-0.180081	-0.300672	-0.448897	-0.360136	-0.676471	-0.30637	-0.0805177	0.025752	-0.298128	-0.489383	-0.343189	-0.031123
-4.81126	1.86651	-0.675703	-0.212906	0.131605	-0.604788	0.77924	-0.186414	-0.594568	0.263173	0.419031	0.631591	-0.259771	0.427217	-0.715919	-0.378733	-0.114528	-0.186662	-0.406637	-0.454728	-0.201887	0.258144	-0.25522	-0.740273	0.0299588	-0.3387	-0.268683	-0.38305	-0.288155	-0.307829	-0.424704	-0.264491	-0.125383	0.982402	-0.691089	-0.377239	-0.745564	1.25055	-0.177938	-0.300187	-0.449469	-0.361773	-0.675527	-0.306889	-0.081125	0.0272303	-0.298239	-0.487692	-0.343168	-0.0300223
-4.81027	1.86988	-0.675121	-0.212333	0.130072	-0.604733	0.780121	-0.184613	-0.593709	0.264752	0.422413	0.629248	-0.258379	0.43036	-0.714202	-0.378218	-0.11511	-0.18593	-0.406054	-0.454552	-0.201399	0.257668	-0.253123	-0.740331	0.0288707	-0.339055	-0.269733	-0.383746	-0.289685	-0.31005	-0.424732	-0.262993	-0.124391	0.981835	-0.691411	-0.376616	-0.747146	1.25159	-0.175809	-0.299684	-0.450044	-0.363405	-0.674587	-0.307414	-0.0817346	0.0286931	-0.298338	-0.485992	-0.343157	-0.0289362
-4.80929	1.87321	-0.674537	-0.21175	0.128531	-0.604681	0.780985	-0.182811	-0.592856	0.266331	0.425802	0.626911	-0.256977	0.433492	-0.712482	-0.377683	-0.115697	-0.185202	-0.405465	-0.454384	-0.200914	0.257198	-0.251017	-0.740375	0.027782	-0.339392	-0.270785	-0.384423	-0.291215	-0.312283	-0.424755	-0.261487	-0.123397	0.981255	-0.691737	-0.375989	-0.748724	1.25263	-0.173693	-0.299163	-0.450621	-0.365033	-0.673652	-0.307945	-0.0823463	0.0301402	-0.298423	-0.484282	-0.343156	-0.0278649
-4.80831	1.87651	-0.67395	-0.211158	0.126982	-0.604632	0.781834	-0.181006	-0.592008	0.267908	0.429199	0.624578	-0.255565	0.436615	-0.710757	-0.377127	-0.11629	-0.184477	-0.40487	-0.454223	-0.200432	0.256733	-0.248903	-0.740404	0.0266927	-0.339709	-0.271838	-0.385083	-0.292748	-0.314525	-0.424773	-0.259972	-0.122402	0.980662	-0.692066	-0.375358	-0.750297	1.25365	-0.171592	-0.298622	-0.4512	-0.366656	-0.672721	-0.308483	-0.0829602	0.0315716	-0.298496	-0.482562	-0.343165	-0.0268082
-4.80732	1.87979	-0.673361	-0.210557	0.125425	-0.604586	0.782667	-0.179201	-0.591166	0.269485	0.432603	0.62225	-0.254145	0.439727	-0.709028	-0.37655	-0.116887	-0.183757	-0.40427	-0.454071	-0.199953	0.256273	-0.246782	-0.740419	0.0256027	-0.340007	-0.272891	-0.385725	-0.294281	-0.316778	-0.424786	-0.258447	-0.121406	0.980056	-0.692398	-0.374722	-0.751866	1.25467	-0.169506	-0.298064	-0.451781	-0.368275	-0.671795	-0.309027	-0.0835763	0.0329871	-0.298556	-0.480833	-0.343185	-0.0257661
-4.80634	1.88302	-0.67277	-0.209947	0.12386	-0.604543	0.783484	-0.177395	-0.590329	0.271061	0.436014	0.619927	-0.252715	0.442829	-0.707295	-0.375952	-0.11749	-0.18304	-0.403664	-0.453926	-0.199478	0.255819	-0.244652	-0.740419	0.0245121	-0.340285	-0.273946	-0.386349	-0.295816	-0.319041	-0.424795	-0.256914	-0.120409	0.979437	-0.692733	-0.374083	-0.75343	1.25567	-0.167433	-0.297486	-0.452364	-0.369889	-0.670874	-0.309577	-0.0841944	0.0343866	-0.298604	-0.479093	-0.343214	-0.0247388
-4.80536	1.88623	-0.672177	-0.209327	0.122287	-0.604502	0.784284	-0.175588	-0.589497	0.272636	0.439432	0.617609	-0.251277	0.445919	-0.705559	-0.375333	-0.118097	-0.182328	-0.403052	-0.453789	-0.199006	0.25537	-0.242515	-0.740404	0.0234207	-0.340545	-0.275001	-0.386954	-0.297352	-0.321314	-0.424798	-0.255373	-0.119411	0.978805	-0.693071	-0.373439	-0.754989	1.25666	-0.165376	-0.296891	-0.45295	-0.371499	-0.669957	-0.310133	-0.0848146	0.03577	-0.298638	-0.477342	-0.343254	-0.023726
-4.80438	1.8894	-0.671581	-0.208697	0.120706	-0.604465	0.785069	-0.173781	-0.588672	0.274209	0.442857	0.615298	-0.249831	0.448998	-0.703819	-0.374694	-0.11871	-0.181619	-0.402434	-0.45366	-0.198536	0.254927	-0.24037	-0.740375	0.0223287	-0.340785	-0.276057	-0.387541	-0.298889	-0.323597	-0.424797	-0.253823	-0.118412	0.978159	-0.693413	-0.372791	-0.756543	1.25765	-0.163333	-0.296277	-0.453537	-0.373103	-0.669046	-0.310696	-0.0854368	0.0371371	-0.298661	-0.475582	-0.343304	-0.0227279
-4.80339	1.89254	-0.670984	-0.208059	0.119118	-0.60443	0.785838	-0.171975	-0.587851	0.275782	0.446287	0.612992	-0.248377	0.452065	-0.702076	-0.374033	-0.119328	-0.180915	-0.401811	-0.453539	-0.19807	0.254489	-0.238218	-0.740332	0.0212359	-0.341006	-0.277113	-0.38811	-0.300427	-0.325888	-0.424792	-0.252266	-0.117412	0.977499	-0.693758	-0.37214	-0.758091	1.25862	-0.161305	-0.295646	-0.454126	-0.374704	-0.668139	-0.311265	-0.086061	0.0384878	-0.29867	-0.473811	-0.343365	-0.0217444
-4.80241	1.89564	-0.670385	-0.207411	0.117522	-0.604397	0.78659	-0.170168	-0.587037	0.277354	0.449724	0.610691	-0.246915	0.455119	-0.70033	-0.373352	-0.119951	-0.180214	-0.401182	-0.453426	-0.197606	0.254056	-0.236058	-0.740273	0.0201423	-0.341208	-0.278169	-0.38866	-0.301966	-0.32819	-0.424781	-0.2507	-0.116412	0.976827	-0.694106	-0.371484	-0.759634	1.25958	-0.159292	-0.294996	-0.454717	-0.376299	-0.667238	-0.31184	-0.0866871	0.0398221	-0.298667	-0.47203	-0.343435	-0.0207755
-4.80143	1.89871	-0.669783	-0.206754	0.115919	-0.604368	0.787327	-0.168363	-0.586228	0.278924	0.453167	0.608397	-0.245446	0.458159	-0.698581	-0.37265	-0.120579	-0.179518	-0.400548	-0.453321	-0.197146	0.253629	-0.23389	-0.7402	0.019048	-0.341391	-0.279225	-0.389191	-0.303506	-0.3305	-0.424767	-0.249127	-0.11541	0.976141	-0.694458	-0.370824	-0.761171	1.26052	-0.157295	-0.294329	-0.455309	-0.377889	-0.666342	-0.312421	-0.0873151	0.0411398	-0.298652	-0.470238	-0.343516	-0.0198211
-4.80044	1.90175	-0.66918	-0.206088	0.114309	-0.604341	0.788047	-0.166559	-0.585424	0.280493	0.456615	0.606109	-0.24397	0.461187	-0.696828	-0.371928	-0.121213	-0.178826	-0.399908	-0.453224	-0.196688	0.253206	-0.231715	-0.740112	0.0179529	-0.341554	-0.28028	-0.389703	-0.305047	-0.332819	-0.424748	-0.247546	-0.114408	0.975441	-0.694812	-0.370161	-0.762702	1.26146	-0.155312	-0.293643	-0.455904	-0.379475	-0.665451	-0.313008	-0.0879449	0.0424407	-0.298624	-0.468436	-0.343607	-0.0188813
-4.79946	1.90475	-0.668575	-0.205412	0.112692	-0.604316	0.788751	-0.164756	-0.584626	0.282061	0.460068	0.603828	-0.242486	0.4642	-0.695073	-0.371184	-0.121851	-0.178138	-0.399262	-0.453136	-0.196232	0.252789	-0.229533	-0.74001	0.016857	-0.341699	-0.281336	-0.390196	-0.306589	-0.335147	-0.424724	-0.245958	-0.113406	0.974728	-0.69517	-0.369493	-0.764227	1.26239	-0.153346	-0.29294	-0.456501	-0.381056	-0.664566	-0.313602	-0.0885765	0.0437249	-0.298585	-0.466622	-0.343708	-0.017956
-4.79848	1.90771	-0.667968	-0.204727	0.111068	-0.604295	0.78944	-0.162955	-0.583834	0.283628	0.463527	0.601553	-0.240997	0.467199	-0.693316	-0.370421	-0.122495	-0.177454	-0.398611	-0.453055	-0.19578	0.252378	-0.227344	-0.739893	0.0157603	-0.341824	-0.282391	-0.39067	-0.308131	-0.337484	-0.424697	-0.244363	-0.112403	0.974001	-0.695532	-0.368821	-0.765745	1.2633	-0.151394	-0.29222	-0.457099	-0.382631	-0.663687	-0.314201	-0.0892098	0.0449921	-0.298532	-0.464798	-0.343819	-0.0170452
-4.79749	1.91064	-0.66736	-0.204034	0.109437	-0.604276	0.790112	-0.161157	-0.583047	0.285193	0.46699	0.599284	-0.239501	0.470183	-0.691556	-0.369636	-0.123144	-0.176774	-0.397955	-0.452982	-0.195329	0.251971	-0.225148	-0.739761	0.0146627	-0.34193	-0.283445	-0.391125	-0.309673	-0.339828	-0.424665	-0.242761	-0.111399	0.973261	-0.695896	-0.368145	-0.767257	1.26421	-0.149459	-0.291482	-0.457699	-0.384201	-0.662813	-0.314807	-0.0898449	0.0462423	-0.298468	-0.462963	-0.343941	-0.0161488
-4.79651	1.91353	-0.66675	-0.203331	0.1078	-0.604259	0.790768	-0.159361	-0.582266	0.286756	0.470458	0.597023	-0.237999	0.473152	-0.689793	-0.368831	-0.123797	-0.176098	-0.397292	-0.452918	-0.194881	0.251569	-0.222944	-0.739614	0.0135643	-0.342017	-0.284498	-0.39156	-0.311217	-0.342181	-0.424629	-0.241152	-0.110396	0.972507	-0.696264	-0.367466	-0.768762	1.2651	-0.14754	-0.290727	-0.458301	-0.385767	-0.661945	-0.315419	-0.0904815	0.0474753	-0.298392	-0.461118	-0.344072	-0.0152669
-4.79553	1.91639	-0.666139	-0.202619	0.106156	-0.604245	0.791409	-0.157568	-0.581491	0.288318	0.47393	0.594768	-0.236491	0.476105	-0.688028	-0.368006	-0.124456	-0.175427	-0.396625	-0.452862	-0.194435	0.251173	-0.220734	-0.739453	0.0124649	-0.342085	-0.28555	-0.391976	-0.31276	-0.344542	-0.424589	-0.239537	-0.109392	0.97174	-0.696636	-0.366782	-0.77026	1.26598	-0.145636	-0.289954	-0.458905	-0.387327	-0.661083	-0.316037	-0.0911198	0.0486911	-0.298304	-0.45926	-0.344214	-0.0143993
-4.79454	1.91921	-0.665526	-0.201898	0.104505	-0.604234	0.792033	-0.155778	-0.580721	0.289879	0.477406	0.59252	-0.234978	0.479042	-0.686261	-0.36716	-0.125121	-0.174759	-0.395952	-0.452813	-0.193991	0.250781	-0.218517	-0.739277	0.0113647	-0.342134	-0.286602	-0.392373	-0.314304	-0.34691	-0.424545	-0.237915	-0.108387	0.970958	-0.69701	-0.366094	-0.771752	1.26685	-0.143749	-0.289165	-0.459511	-0.388881	-0.660227	-0.31666	-0.0917597	0.0498895	-0.298203	-0.457392	-0.344366	-0.0135461
-4.79356	1.92199	-0.664911	-0.201168	0.102849	-0.604225	0.792641	-0.153991	-0.579957	0.291437	0.480886	0.59028	-0.23346	0.481962	-0.684493	-0.366293	-0.12579	-0.174096	-0.395273	-0.452774	-0.19355	0.250395	-0.216294	-0.739085	0.0102635	-0.342164	-0.287651	-0.392749	-0.315849	-0.349286	-0.424498	-0.236287	-0.107383	0.970163	-0.697388	-0.365403	-0.773235	1.2677	-0.141878	-0.288358	-0.460118	-0.390431	-0.659377	-0.31729	-0.092401	0.0510705	-0.298091	-0.455513	-0.344528	-0.0127072
-4.79258	1.92473	-0.664296	-0.200429	0.101186	-0.604218	0.793234	-0.152209	-0.579199	0.292994	0.48437	0.588047	-0.231937	0.484865	-0.682722	-0.365407	-0.126464	-0.173438	-0.394589	-0.452742	-0.19311	0.250013	-0.214063	-0.738879	0.00916136	-0.342175	-0.288699	-0.393107	-0.317393	-0.351669	-0.424446	-0.234653	-0.106378	0.969355	-0.69777	-0.364707	-0.774712	1.26855	-0.140023	-0.287535	-0.460727	-0.391975	-0.658533	-0.317926	-0.0930438	0.0522339	-0.297968	-0.453622	-0.3447	-0.0118826
-4.7916	1.92744	-0.663679	-0.199681	0.0995173	-0.604214	0.79381	-0.150431	-0.578446	0.29455	0.487857	0.585821	-0.23041	0.487751	-0.68095	-0.3645	-0.127144	-0.172783	-0.3939	-0.452718	-0.192672	0.249636	-0.211827	-0.738659	0.00805822	-0.342166	-0.289746	-0.393444	-0.318938	-0.354059	-0.424391	-0.233013	-0.105373	0.968532	-0.698154	-0.364008	-0.77618	1.26938	-0.138185	-0.286695	-0.461337	-0.393514	-0.657695	-0.318568	-0.0936879	0.0533796	-0.297832	-0.451719	-0.344882	-0.0110723
-4.79061	1.9301	-0.663061	-0.198925	0.0978427	-0.604212	0.794371	-0.148657	-0.577699	0.296103	0.491346	0.583603	-0.228878	0.490619	-0.679176	-0.363573	-0.127829	-0.172133	-0.393205	-0.452703	-0.192236	0.249265	-0.209584	-0.738423	0.00695406	-0.34214	-0.290791	-0.393761	-0.320482	-0.356457	-0.424333	-0.231368	-0.104368	0.967696	-0.698543	-0.363304	-0.777641	1.27021	-0.136363	-0.285839	-0.461949	-0.395047	-0.656864	-0.319215	-0.0943335	0.0545076	-0.297685	-0.449805	-0.345074	-0.0102761
-4.78963	1.93273	-0.662442	-0.198159	0.0961624	-0.604213	0.794915	-0.146889	-0.576957	0.297654	0.494839	0.581393	-0.227343	0.493468	-0.6774	-0.362626	-0.128519	-0.171487	-0.392505	-0.452696	-0.191802	0.248897	-0.207334	-0.738172	0.00584887	-0.342094	-0.291833	-0.394058	-0.322027	-0.35886	-0.424271	-0.229717	-0.103363	0.966845	-0.698934	-0.362597	-0.779094	1.27102	-0.134559	-0.284966	-0.462563	-0.396575	-0.656039	-0.319869	-0.0949803	0.0556178	-0.297526	-0.447879	-0.345276	-0.00949415
-4.78865	1.93532	-0.661822	-0.197385	0.0944765	-0.604215	0.795444	-0.145125	-0.576221	0.299203	0.498334	0.579191	-0.225803	0.496298	-0.675624	-0.361659	-0.129213	-0.170845	-0.3918	-0.452697	-0.191369	0.248535	-0.205079	-0.737907	0.00474262	-0.342029	-0.292874	-0.394335	-0.323571	-0.361271	-0.424205	-0.228061	-0.102358	0.965981	-0.699329	-0.361886	-0.780538	1.27182	-0.132771	-0.284077	-0.463178	-0.398097	-0.65522	-0.320528	-0.0956284	0.05671	-0.297356	-0.445942	-0.345488	-0.00872626
-4.78766	1.93787	-0.6612	-0.196603	0.0927852	-0.60422	0.795957	-0.143368	-0.575491	0.30075	0.501831	0.576996	-0.224261	0.499109	-0.673846	-0.360672	-0.129914	-0.170208	-0.391089	-0.452706	-0.190938	0.248178	-0.202817	-0.737626	0.00363528	-0.341946	-0.293912	-0.394592	-0.325115	-0.363687	-0.424136	-0.2264	-0.101354	0.965104	-0.699728	-0.361171	-0.781974	1.2726	-0.131	-0.283172	-0.463794	-0.399613	-0.654409	-0.321193	-0.0962776	0.0577842	-0.297175	-0.443992	-0.34571	-0.00797245
-4.78668	1.94039	-0.660578	-0.195811	0.0910886	-0.604228	0.796454	-0.141616	-0.574766	0.302295	0.505331	0.57481	-0.222715	0.501901	-0.672068	-0.359665	-0.130619	-0.169575	-0.390373	-0.452724	-0.190508	0.247825	-0.20055	-0.737331	0.00252682	-0.341843	-0.294948	-0.394828	-0.326659	-0.36611	-0.424064	-0.224734	-0.100349	0.964212	-0.70013	-0.360452	-0.783401	1.27338	-0.129246	-0.282251	-0.464412	-0.401124	-0.653604	-0.321864	-0.096928	0.0588403	-0.296982	-0.442031	-0.345942	-0.00723265
-4.7857	1.94286	-0.659955	-0.195012	0.0893868	-0.604237	0.796936	-0.13987	-0.574046	0.303838	0.508832	0.572632	-0.221167	0.504672	-0.670288	-0.358638	-0.131329	-0.168946	-0.389652	-0.45275	-0.19008	0.247477	-0.198276	-0.737021	0.00141721	-0.341723	-0.295981	-0.395044	-0.328203	-0.368538	-0.423989	-0.223064	-0.0993452	0.963306	-0.700535	-0.359729	-0.78482	1.27414	-0.127509	-0.281314	-0.465032	-0.40263	-0.652805	-0.322541	-0.0975795	0.0598782	-0.296778	-0.440057	-0.346184	-0.00650681
-4.78471	1.94529	-0.659332	-0.194203	0.0876799	-0.604249	0.797401	-0.138132	-0.573333	0.305378	0.512334	0.570462	-0.219616	0.507423	-0.668508	-0.357591	-0.132045	-0.168322	-0.388926	-0.452784	-0.189652	0.247133	-0.195997	-0.736696	0.00030644	-0.341583	-0.297011	-0.39524	-0.329746	-0.370972	-0.423911	-0.221389	-0.0983413	0.962387	-0.700944	-0.359002	-0.786229	1.27489	-0.12579	-0.280362	-0.465653	-0.404129	-0.652014	-0.323224	-0.098232	0.0608978	-0.296563	-0.438071	-0.346436	-0.0057949
-4.78373	1.94768	-0.658707	-0.193386	0.0859682	-0.604262	0.797851	-0.1364	-0.572624	0.306916	0.515838	0.568301	-0.218062	0.510152	-0.666727	-0.356525	-0.132765	-0.167702	-0.388195	-0.452826	-0.189226	0.246794	-0.193712	-0.736355	-0.000805536	-0.341425	-0.298038	-0.395415	-0.331288	-0.373412	-0.423829	-0.219709	-0.0973378	0.961453	-0.701356	-0.358272	-0.787629	1.27563	-0.124087	-0.279394	-0.466275	-0.405623	-0.651229	-0.323912	-0.0988855	0.061899	-0.296337	-0.436073	-0.346698	-0.00509684
-4.78275	1.95003	-0.658082	-0.192561	0.0842516	-0.604278	0.798286	-0.134675	-0.571921	0.308452	0.519342	0.566148	-0.216507	0.512861	-0.664946	-0.355439	-0.133491	-0.167087	-0.387458	-0.452876	-0.188801	0.24646	-0.191422	-0.736	-0.00191874	-0.341248	-0.299062	-0.39557	-0.33283	-0.375857	-0.423745	-0.218026	-0.0963347	0.960506	-0.701772	-0.357537	-0.78902	1.27636	-0.122403	-0.27841	-0.466899	-0.407111	-0.650451	-0.324606	-0.0995399	0.0628818	-0.2961	-0.434062	-0.346969	-0.00441259
-4.78177	1.95234	-0.657457	-0.191728	0.0825304	-0.604295	0.798705	-0.132958	-0.571224	0.309985	0.522847	0.564004	-0.21495	0.515547	-0.663164	-0.354334	-0.134222	-0.166476	-0.386716	-0.452935	-0.188377	0.246129	-0.189126	-0.73563	-0.0030332	-0.341053	-0.300083	-0.395703	-0.334371	-0.378306	-0.423658	-0.216338	-0.095332	0.959544	-0.702192	-0.356799	-0.790401	1.27707	-0.120736	-0.277412	-0.467524	-0.408594	-0.649681	-0.325305	-0.100195	0.063846	-0.295852	-0.432039	-0.347251	-0.00374209
-4.78078	1.95461	-0.656831	-0.190886	0.0808047	-0.604315	0.799108	-0.131249	-0.570532	0.311515	0.526353	0.561868	-0.213392	0.518211	-0.661383	-0.353209	-0.134957	-0.165869	-0.385969	-0.453001	-0.187953	0.245804	-0.186825	-0.735245	-0.00414895	-0.34084	-0.3011	-0.395816	-0.335911	-0.380761	-0.423569	-0.214647	-0.0943299	0.958569	-0.702615	-0.356057	-0.791772	1.27777	-0.119086	-0.276398	-0.46815	-0.41007	-0.648917	-0.326011	-0.100851	0.0647916	-0.295593	-0.430003	-0.347542	-0.00308528
-4.7798	1.95684	-0.656204	-0.190036	0.0790746	-0.604336	0.799496	-0.129549	-0.569845	0.313042	0.529858	0.559742	-0.211833	0.520852	-0.659601	-0.352066	-0.135698	-0.165267	-0.385218	-0.453076	-0.18753	0.245482	-0.184519	-0.734845	-0.00526602	-0.340608	-0.302113	-0.395909	-0.337451	-0.38322	-0.423477	-0.212952	-0.0933283	0.95758	-0.703041	-0.355311	-0.793134	1.27846	-0.117455	-0.27537	-0.468778	-0.411541	-0.648161	-0.326721	-0.101508	0.0657186	-0.295324	-0.427955	-0.347843	-0.00244211
-4.77882	1.95903	-0.655578	-0.189179	0.0773402	-0.60436	0.799868	-0.127856	-0.569164	0.314567	0.533364	0.557624	-0.210273	0.523471	-0.657819	-0.350902	-0.136444	-0.16467	-0.384461	-0.453159	-0.187108	0.245165	-0.182207	-0.73443	-0.00638443	-0.340358	-0.303123	-0.39598	-0.338989	-0.385683	-0.423382	-0.211254	-0.0923273	0.956577	-0.703471	-0.354562	-0.794485	1.27914	-0.115841	-0.274326	-0.469407	-0.413006	-0.647412	-0.327438	-0.102165	0.0666267	-0.295044	-0.425893	-0.348153	-0.00181251
-4.77783	1.96117	-0.654951	-0.188313	0.0756017	-0.604385	0.800225	-0.126173	-0.568488	0.316089	0.536869	0.555515	-0.208713	0.526065	-0.656038	-0.34972	-0.137195	-0.164076	-0.383699	-0.45325	-0.186686	0.244853	-0.179891	-0.734	-0.00750422	-0.34009	-0.304129	-0.39603	-0.340526	-0.388151	-0.423285	-0.209553	-0.0913269	0.955559	-0.703905	-0.353809	-0.795826	1.2798	-0.114245	-0.273269	-0.470036	-0.414465	-0.64667	-0.32816	-0.102824	0.0675161	-0.294753	-0.423819	-0.348473	-0.00119643
-4.77685	1.96328	-0.654323	-0.187439	0.0738593	-0.604411	0.800566	-0.124499	-0.567818	0.317608	0.540373	0.553416	-0.207152	0.528636	-0.654257	-0.348519	-0.137951	-0.163488	-0.382932	-0.453349	-0.186265	0.244544	-0.177569	-0.733555	-0.00862543	-0.339803	-0.30513	-0.396059	-0.342062	-0.390622	-0.423186	-0.207849	-0.0903273	0.954528	-0.704342	-0.353051	-0.797156	1.28046	-0.112667	-0.272196	-0.470667	-0.415918	-0.645936	-0.328887	-0.103482	0.0683865	-0.294452	-0.421732	-0.348803	-0.000593788
-4.77587	1.96534	-0.653696	-0.186557	0.072113	-0.60444	0.800892	-0.122835	-0.567152	0.319124	0.543877	0.551326	-0.205592	0.531182	-0.652477	-0.347299	-0.138712	-0.162903	-0.38216	-0.453456	-0.185844	0.24424	-0.175243	-0.733095	-0.00974807	-0.339499	-0.306128	-0.396068	-0.343597	-0.393097	-0.423085	-0.206141	-0.0893284	0.953483	-0.704783	-0.352291	-0.798476	1.2811	-0.111107	-0.27111	-0.4713	-0.417365	-0.645209	-0.32962	-0.104141	0.069238	-0.294141	-0.419631	-0.349143	-4.5311e-06
-4.77488	1.96736	-0.653069	-0.185668	0.070363	-0.60447	0.801203	-0.121181	-0.566492	0.320637	0.547379	0.549245	-0.204032	0.533704	-0.650697	-0.34606	-0.139479	-0.162324	-0.381384	-0.453571	-0.185423	0.243939	-0.172912	-0.73262	-0.0108722	-0.339177	-0.307121	-0.396055	-0.345131	-0.395576	-0.422981	-0.204432	-0.0883303	0.952424	-0.705227	-0.351526	-0.799785	1.28172	-0.109565	-0.27001	-0.471933	-0.418806	-0.644489	-0.330358	-0.104801	0.0700704	-0.29382	-0.417517	-0.349492	0.000571409
-4.7739	1.96933	-0.652442	-0.184771	0.0686094	-0.604502	0.801499	-0.119537	-0.565837	0.322147	0.550879	0.547173	-0.202472	0.5362	-0.648918	-0.344803	-0.14025	-0.161749	-0.380602	-0.453694	-0.185002	0.243643	-0.170577	-0.73213	-0.0119978	-0.338836	-0.308109	-0.396021	-0.346663	-0.398058	-0.422876	-0.202719	-0.0873331	0.951351	-0.705675	-0.350758	-0.801082	1.28234	-0.108042	-0.268895	-0.472567	-0.420241	-0.643777	-0.331101	-0.105461	0.0708838	-0.293488	-0.41539	-0.34985	0.0011341
-4.77292	1.97127	-0.651815	-0.183867	0.0668523	-0.604535	0.801779	-0.117903	-0.565187	0.323653	0.554378	0.545111	-0.200914	0.538671	-0.647141	-0.343526	-0.141026	-0.161178	-0.379816	-0.453824	-0.184581	0.243351	-0.168237	-0.731625	-0.013125	-0.338478	-0.309092	-0.395965	-0.348194	-0.400543	-0.422769	-0.201005	-0.0863368	0.950264	-0.706127	-0.349986	-0.802369	1.28294	-0.106537	-0.267767	-0.473202	-0.421671	-0.643073	-0.33185	-0.106122	0.071678	-0.293147	-0.413249	-0.350218	0.00168361
-4.77193	1.97316	-0.651188	-0.182954	0.0650919	-0.604569	0.802044	-0.116281	-0.564542	0.325156	0.557875	0.543058	-0.199356	0.541116	-0.645364	-0.342232	-0.141807	-0.160612	-0.379025	-0.453963	-0.184159	0.243063	-0.165892	-0.731105	-0.0142537	-0.338102	-0.31007	-0.395889	-0.349722	-0.403031	-0.42266	-0.199288	-0.0853414	0.949163	-0.706582	-0.349211	-0.803644	1.28353	-0.10505	-0.266626	-0.473838	-0.423094	-0.642376	-0.332604	-0.106782	0.0724529	-0.292796	-0.411095	-0.350595	0.00222001
-4.77095	1.975	-0.650561	-0.182035	0.0633283	-0.604605	0.802295	-0.114669	-0.563903	0.326656	0.561369	0.541015	-0.197801	0.543535	-0.643588	-0.340919	-0.142593	-0.16005	-0.378229	-0.454109	-0.183738	0.242778	-0.163544	-0.73057	-0.015384	-0.337709	-0.311044	-0.395791	-0.35125	-0.405521	-0.422549	-0.197569	-0.0843469	0.948048	-0.707041	-0.348431	-0.804907	1.28411	-0.103581	-0.265471	-0.474475	-0.424511	-0.641687	-0.333363	-0.107443	0.0732086	-0.292434	-0.408927	-0.350982	0.00274338
-4.76997	1.97681	-0.649935	-0.181108	0.0615617	-0.604643	0.80253	-0.113069	-0.563268	0.328152	0.564861	0.538982	-0.196247	0.545926	-0.641814	-0.339588	-0.143384	-0.159493	-0.377429	-0.454264	-0.183316	0.242498	-0.161191	-0.73002	-0.016516	-0.337298	-0.312012	-0.395672	-0.352775	-0.408014	-0.422437	-0.195849	-0.0833535	0.946919	-0.707504	-0.347649	-0.806159	1.28467	-0.102132	-0.264303	-0.475113	-0.425922	-0.641006	-0.334128	-0.108104	0.0739449	-0.292063	-0.406745	-0.351378	0.00325378
-4.76899	1.97857	-0.649309	-0.180174	0.0597922	-0.604682	0.802751	-0.111481	-0.562638	0.329644	0.56835	0.536958	-0.194695	0.548291	-0.640042	-0.338239	-0.144181	-0.158941	-0.376624	-0.454426	-0.182894	0.242221	-0.158835	-0.729455	-0.0176497	-0.336869	-0.312974	-0.395531	-0.354299	-0.410509	-0.422323	-0.194127	-0.0823612	0.945777	-0.70797	-0.346862	-0.807398	1.28522	-0.1007	-0.263122	-0.475752	-0.427327	-0.640333	-0.334897	-0.108765	0.0746619	-0.291683	-0.404549	-0.351784	0.00375128
-4.768	1.98029	-0.648684	-0.179233	0.0580198	-0.604721	0.802956	-0.109905	-0.562013	0.331133	0.571835	0.534944	-0.193145	0.550628	-0.638271	-0.336871	-0.144982	-0.158393	-0.375814	-0.454595	-0.182471	0.241948	-0.156474	-0.728875	-0.018785	-0.336423	-0.313931	-0.395369	-0.355821	-0.413006	-0.422208	-0.192403	-0.08137	0.94462	-0.708441	-0.346072	-0.808626	1.28576	-0.0992875	-0.261929	-0.476392	-0.428726	-0.639667	-0.335672	-0.109426	0.0753594	-0.291293	-0.402339	-0.352198	0.00423598
-4.76702	1.98196	-0.648059	-0.178285	0.0562448	-0.604763	0.803147	-0.108342	-0.561393	0.332618	0.575317	0.53294	-0.191599	0.552937	-0.636501	-0.335486	-0.145788	-0.15785	-0.375	-0.454772	-0.182047	0.241679	-0.15411	-0.72828	-0.0199221	-0.33596	-0.314883	-0.395186	-0.35734	-0.415505	-0.422092	-0.190679	-0.08038	0.943449	-0.708914	-0.345278	-0.809841	1.28628	-0.0978935	-0.260722	-0.477032	-0.430119	-0.63901	-0.336452	-0.110087	0.0760374	-0.290893	-0.400115	-0.352622	0.00470793
-4.76604	1.98359	-0.647435	-0.17733	0.0544672	-0.604805	0.803323	-0.106791	-0.560778	0.334099	0.578796	0.530946	-0.190055	0.555218	-0.634734	-0.334084	-0.146598	-0.157311	-0.374181	-0.454957	-0.181623	0.241413	-0.151742	-0.72767	-0.021061	-0.33548	-0.315828	-0.394981	-0.358858	-0.418005	-0.421975	-0.188953	-0.0793911	0.942265	-0.709392	-0.344481	-0.811043	1.2868	-0.0965182	-0.259504	-0.477673	-0.431506	-0.63836	-0.337236	-0.110748	0.0766959	-0.290485	-0.397877	-0.353055	0.00516722
-4.76505	1.98517	-0.646811	-0.176368	0.0526873	-0.604848	0.803484	-0.105254	-0.560167	0.335576	0.58227	0.528962	-0.188514	0.55747	-0.632969	-0.332663	-0.147414	-0.156777	-0.373358	-0.455149	-0.181197	0.241151	-0.149371	-0.727045	-0.0222017	-0.334982	-0.316767	-0.394754	-0.360373	-0.420507	-0.421856	-0.187227	-0.0784036	0.941067	-0.709873	-0.34368	-0.812233	1.2873	-0.0951617	-0.258273	-0.478314	-0.432887	-0.637719	-0.338026	-0.111409	0.0773348	-0.290067	-0.395624	-0.353497	0.00561393
-4.76407	1.98671	-0.646189	-0.175399	0.050905	-0.604892	0.803631	-0.10373	-0.559561	0.33705	0.585741	0.526988	-0.186977	0.559693	-0.631206	-0.331225	-0.148235	-0.156248	-0.37253	-0.455349	-0.180771	0.240892	-0.146996	-0.726406	-0.0233443	-0.334468	-0.3177	-0.394506	-0.361886	-0.423009	-0.421737	-0.185499	-0.0774173	0.939854	-0.710358	-0.342876	-0.813411	1.28778	-0.0938241	-0.25703	-0.478957	-0.434262	-0.637085	-0.33882	-0.11207	0.077954	-0.289639	-0.393357	-0.353948	0.00604813
-4.76309	1.98821	-0.645567	-0.174424	0.0491206	-0.604938	0.803763	-0.102219	-0.55896	0.338519	0.589206	0.525024	-0.185443	0.561886	-0.629445	-0.32977	-0.14906	-0.155723	-0.371698	-0.455556	-0.180343	0.240637	-0.144618	-0.725751	-0.0244887	-0.333936	-0.318627	-0.394237	-0.363396	-0.425513	-0.421617	-0.183771	-0.0764323	0.938629	-0.710847	-0.342068	-0.814575	1.28826	-0.0925053	-0.255775	-0.4796	-0.43563	-0.63646	-0.33962	-0.11273	0.0785536	-0.289203	-0.391075	-0.354407	0.00646991
-4.7621	1.98966	-0.644947	-0.173442	0.0473342	-0.604984	0.803881	-0.100723	-0.558363	0.339983	0.592667	0.52307	-0.183914	0.56405	-0.627687	-0.328298	-0.149891	-0.155203	-0.370862	-0.45577	-0.179914	0.240385	-0.142236	-0.725081	-0.025635	-0.333388	-0.319547	-0.393946	-0.364904	-0.428017	-0.421496	-0.182043	-0.0754487	0.937389	-0.71134	-0.341257	-0.815726	1.28872	-0.0912055	-0.254509	-0.480243	-0.436993	-0.635842	-0.340424	-0.11339	0.0791335	-0.288758	-0.388779	-0.354876	0.00687935
-4.76112	1.99106	-0.644327	-0.172454	0.0455459	-0.60503	0.803985	-0.0992411	-0.557771	0.341444	0.596123	0.521127	-0.182389	0.566183	-0.625931	-0.326809	-0.150726	-0.154688	-0.370021	-0.455992	-0.179484	0.240137	-0.139852	-0.724397	-0.0267833	-0.332824	-0.32046	-0.393633	-0.366409	-0.430521	-0.421375	-0.180315	-0.0744665	0.936135	-0.711836	-0.340442	-0.816863	1.28916	-0.0899247	-0.253231	-0.480887	-0.43835	-0.635233	-0.341233	-0.114049	0.0796936	-0.288305	-0.386467	-0.355354	0.00727653
-4.76014	1.99243	-0.643709	-0.171459	0.0437558	-0.605078	0.804074	-0.0977737	-0.557183	0.3429	0.599573	0.519194	-0.180868	0.568286	-0.624178	-0.325302	-0.151566	-0.154177	-0.369176	-0.456221	-0.179052	0.239892	-0.137465	-0.723697	-0.0279336	-0.332242	-0.321366	-0.393299	-0.367912	-0.433026	-0.421253	-0.178587	-0.0734858	0.934868	-0.712337	-0.339624	-0.817987	1.2896	-0.0886628	-0.251942	-0.481531	-0.4397	-0.634632	-0.342047	-0.114708	0.080234	-0.287842	-0.384141	-0.35584	0.00766154
-4.75916	1.99374	-0.643091	-0.170459	0.0419641	-0.605126	0.804149	-0.0963212	-0.556599	0.344352	0.603017	0.517271	-0.179353	0.570358	-0.622428	-0.323779	-0.15241	-0.153671	-0.368327	-0.456457	-0.178619	0.23965	-0.135075	-0.722983	-0.029086	-0.331645	-0.322266	-0.392943	-0.369412	-0.435531	-0.421131	-0.176859	-0.0725066	0.933587	-0.712841	-0.338802	-0.819098	1.29002	-0.0874201	-0.250642	-0.482176	-0.441045	-0.634039	-0.342865	-0.115367	0.0807545	-0.287371	-0.3818	-0.356335	0.00803446
-4.75817	1.99501	-0.642475	-0.169452	0.0401708	-0.605175	0.80421	-0.0948839	-0.55602	0.345799	0.606456	0.515358	-0.177842	0.572399	-0.62068	-0.32224	-0.15326	-0.15317	-0.367473	-0.4567	-0.178184	0.239411	-0.132682	-0.722254	-0.0302404	-0.331031	-0.323158	-0.392566	-0.370909	-0.438035	-0.421008	-0.175131	-0.0715289	0.932292	-0.713349	-0.337977	-0.820194	1.29043	-0.0861964	-0.249331	-0.482821	-0.442383	-0.633454	-0.343688	-0.116024	0.0812552	-0.286892	-0.379443	-0.356839	0.00839537
-4.75719	1.99624	-0.641861	-0.168439	0.0383762	-0.605224	0.804257	-0.0934621	-0.555445	0.347241	0.609889	0.513456	-0.176337	0.574408	-0.618936	-0.320683	-0.154114	-0.152674	-0.366615	-0.456949	-0.177747	0.239176	-0.130287	-0.72151	-0.0313969	-0.330401	-0.324043	-0.392167	-0.372402	-0.440539	-0.420886	-0.173404	-0.0705527	0.930984	-0.713861	-0.337148	-0.821277	1.29082	-0.0849918	-0.248009	-0.483466	-0.443715	-0.632878	-0.344515	-0.116682	0.081736	-0.286404	-0.377071	-0.357352	0.00874437
-4.75621	1.99742	-0.641248	-0.167421	0.0365803	-0.605274	0.80429	-0.0920562	-0.554874	0.348679	0.613314	0.511564	-0.174838	0.576386	-0.617195	-0.319111	-0.154973	-0.152182	-0.365754	-0.457206	-0.177308	0.238943	-0.127889	-0.720751	-0.0325555	-0.329754	-0.32492	-0.391746	-0.373893	-0.443042	-0.420763	-0.171677	-0.0695782	0.929662	-0.714376	-0.336316	-0.822345	1.2912	-0.0838064	-0.246677	-0.484111	-0.445042	-0.63231	-0.345347	-0.117338	0.0821969	-0.285908	-0.374684	-0.357872	0.00908155
-4.75522	1.99856	-0.640636	-0.166396	0.0347832	-0.605324	0.804309	-0.0906663	-0.554307	0.350112	0.616734	0.509682	-0.173344	0.578331	-0.615458	-0.317522	-0.155837	-0.151695	-0.364888	-0.45747	-0.176867	0.238713	-0.125489	-0.719977	-0.0337164	-0.329092	-0.32579	-0.391304	-0.375381	-0.445544	-0.420641	-0.169951	-0.0686054	0.928326	-0.714896	-0.335481	-0.823399	1.29157	-0.0826402	-0.245335	-0.484757	-0.446362	-0.63175	-0.346183	-0.117994	0.0826379	-0.285404	-0.372281	-0.358402	0.00940698
-4.75424	1.99965	-0.640026	-0.165367	0.0329852	-0.605375	0.804314	-0.0892928	-0.553744	0.35154	0.620146	0.507811	-0.171857	0.580243	-0.613724	-0.315917	-0.156705	-0.151212	-0.364018	-0.45774	-0.176424	0.238487	-0.123087	-0.719189	-0.0348794	-0.328414	-0.326652	-0.39084	-0.376865	-0.448046	-0.420518	-0.168227	-0.0676343	0.926977	-0.715419	-0.334642	-0.824439	1.29192	-0.0814932	-0.243982	-0.485403	-0.447676	-0.631198	-0.347024	-0.118648	0.0830589	-0.284892	-0.369863	-0.35894	0.00972076
-4.75326	2.00069	-0.639418	-0.164331	0.0311862	-0.605426	0.804306	-0.087936	-0.553186	0.352962	0.623551	0.505951	-0.170376	0.582122	-0.611994	-0.314297	-0.157578	-0.150735	-0.363144	-0.458017	-0.175979	0.238263	-0.120683	-0.718386	-0.0360447	-0.32772	-0.327506	-0.390355	-0.378346	-0.450545	-0.420396	-0.166503	-0.0666648	0.925615	-0.715947	-0.3338	-0.825463	1.29226	-0.0803654	-0.24262	-0.486049	-0.448984	-0.630655	-0.347869	-0.119302	0.08346	-0.284372	-0.367429	-0.359486	0.010023
-4.75227	2.00169	-0.638811	-0.163291	0.0293865	-0.605477	0.804284	-0.0865961	-0.55263	0.35438	0.626948	0.504101	-0.168902	0.583968	-0.610267	-0.312661	-0.158455	-0.150262	-0.362267	-0.4583	-0.175531	0.238042	-0.118277	-0.717568	-0.0372123	-0.327011	-0.328352	-0.389848	-0.379823	-0.453044	-0.420275	-0.164781	-0.0656972	0.924238	-0.716478	-0.332955	-0.826473	1.29259	-0.0792569	-0.241249	-0.486695	-0.450287	-0.630121	-0.348718	-0.119955	0.083841	-0.283844	-0.364979	-0.36004	0.0103137
-4.75129	2.00264	-0.638206	-0.162245	0.0275861	-0.605528	0.804248	-0.0852735	-0.552079	0.355793	0.630337	0.502261	-0.167435	0.585781	-0.608544	-0.311009	-0.159337	-0.149794	-0.361385	-0.45859	-0.175081	0.237824	-0.115869	-0.716735	-0.0383823	-0.326286	-0.329189	-0.38932	-0.381297	-0.45554	-0.420154	-0.16306	-0.0647314	0.922849	-0.717014	-0.332106	-0.827469	1.29291	-0.0781677	-0.239867	-0.48734	-0.451583	-0.629594	-0.349572	-0.120606	0.0842021	-0.283308	-0.362513	-0.360603	0.0105931
-4.75031	2.00355	-0.637604	-0.161194	0.0257852	-0.605579	0.804199	-0.0839684	-0.551531	0.3572	0.633718	0.500433	-0.165975	0.587559	-0.606826	-0.309341	-0.160224	-0.149331	-0.3605	-0.458886	-0.174628	0.237609	-0.113459	-0.715887	-0.0395546	-0.325546	-0.330018	-0.38877	-0.382767	-0.458034	-0.420034	-0.161341	-0.0637674	0.921446	-0.717553	-0.331254	-0.828449	1.29321	-0.0770977	-0.238477	-0.487986	-0.452873	-0.629076	-0.350429	-0.121257	0.0845431	-0.282765	-0.360032	-0.361174	0.0108612
-4.74932	2.00441	-0.637003	-0.160138	0.0239839	-0.60563	0.804137	-0.082681	-0.550987	0.358602	0.637091	0.498614	-0.164523	0.589303	-0.605111	-0.307659	-0.161115	-0.148872	-0.359611	-0.459188	-0.174173	0.237396	-0.111048	-0.715025	-0.0407293	-0.324791	-0.330839	-0.388199	-0.384234	-0.460527	-0.419914	-0.159624	-0.0628053	0.920029	-0.718096	-0.330399	-0.829413	1.29349	-0.0760471	-0.237078	-0.488632	-0.454158	-0.628567	-0.351291	-0.121906	0.0848642	-0.282214	-0.357534	-0.361752	0.0111181
-4.74834	2.00523	-0.636404	-0.159077	0.0221823	-0.605681	0.804061	-0.0814118	-0.550447	0.359998	0.640455	0.496806	-0.163078	0.591013	-0.603401	-0.305961	-0.162011	-0.148418	-0.358718	-0.459496	-0.173715	0.237186	-0.108636	-0.714148	-0.0419065	-0.324021	-0.331651	-0.387606	-0.385696	-0.463016	-0.419795	-0.157909	-0.0618452	0.918599	-0.718644	-0.329541	-0.830362	1.29377	-0.0750158	-0.23567	-0.489278	-0.455436	-0.628066	-0.352157	-0.122554	0.0851651	-0.281656	-0.355019	-0.362339	0.0113639
-4.74736	2.006	-0.635808	-0.158012	0.0203805	-0.605732	0.803972	-0.0801608	-0.549909	0.361389	0.64381	0.495009	-0.161641	0.592687	-0.601695	-0.304249	-0.162911	-0.147969	-0.357822	-0.459811	-0.173253	0.236978	-0.106222	-0.713257	-0.0430862	-0.323236	-0.332454	-0.386992	-0.387155	-0.465503	-0.419678	-0.156196	-0.060887	0.917156	-0.719195	-0.328679	-0.831296	1.29403	-0.0740038	-0.234253	-0.489923	-0.456709	-0.627573	-0.353026	-0.123201	0.085446	-0.281091	-0.352489	-0.362934	0.0115987
-4.74638	2.00672	-0.635213	-0.156942	0.0185787	-0.605783	0.80387	-0.0789285	-0.549376	0.362774	0.647156	0.493223	-0.160213	0.594327	-0.599994	-0.302522	-0.163816	-0.147525	-0.356922	-0.460131	-0.172789	0.236773	-0.103807	-0.712351	-0.0442684	-0.322436	-0.333248	-0.386357	-0.388609	-0.467987	-0.419561	-0.154486	-0.0599308	0.9157	-0.71975	-0.327815	-0.832214	1.29427	-0.0730111	-0.232828	-0.490568	-0.457976	-0.627089	-0.3539	-0.123846	0.0857069	-0.280519	-0.349941	-0.363536	0.0118226
-4.74539	2.0074	-0.634621	-0.155867	0.016777	-0.605833	0.803755	-0.077715	-0.548845	0.364153	0.650492	0.491447	-0.158793	0.595931	-0.598297	-0.30078	-0.164725	-0.147086	-0.356019	-0.460457	-0.172321	0.23657	-0.101391	-0.71143	-0.0454532	-0.321621	-0.334033	-0.3857	-0.390059	-0.470468	-0.419446	-0.152778	-0.0589767	0.914231	-0.72031	-0.326947	-0.833116	1.2945	-0.0720378	-0.231395	-0.491213	-0.459237	-0.626614	-0.354777	-0.12449	0.0859477	-0.27994	-0.347378	-0.364147	0.0120356
-4.74441	2.00803	-0.634032	-0.154789	0.0149754	-0.605883	0.803628	-0.0765207	-0.548317	0.365526	0.653819	0.489682	-0.157382	0.597499	-0.596605	-0.299024	-0.165638	-0.146652	-0.355112	-0.460789	-0.171851	0.23637	-0.0989741	-0.710494	-0.0466405	-0.320792	-0.334808	-0.385022	-0.391505	-0.472946	-0.419332	-0.151072	-0.0580246	0.912748	-0.720873	-0.326076	-0.834002	1.29472	-0.0710839	-0.229954	-0.491857	-0.460492	-0.626146	-0.355658	-0.125132	0.0861684	-0.279354	-0.344797	-0.364765	0.012238
-4.74343	2.00862	-0.633445	-0.153706	0.0131741	-0.605932	0.803487	-0.0753458	-0.547793	0.366894	0.657135	0.487927	-0.15598	0.599031	-0.594918	-0.297253	-0.166556	-0.146222	-0.354201	-0.461127	-0.171377	0.236172	-0.0965565	-0.709545	-0.0478306	-0.319949	-0.335575	-0.384323	-0.392947	-0.47542	-0.41922	-0.14937	-0.0570746	0.911252	-0.721441	-0.325202	-0.834872	1.29493	-0.0701493	-0.228506	-0.492501	-0.461741	-0.625688	-0.356543	-0.125773	0.0863691	-0.278761	-0.3422	-0.36539	0.0124297
-4.74244	2.00916	-0.63286	-0.152619	0.0113732	-0.605981	0.803334	-0.0741905	-0.547272	0.368255	0.660441	0.486183	-0.154588	0.600526	-0.593235	-0.295469	-0.167478	-0.145798	-0.353287	-0.46147	-0.170899	0.235976	-0.0941383	-0.70858	-0.0490233	-0.319092	-0.336331	-0.383602	-0.394384	-0.477891	-0.419109	-0.14767	-0.0561268	0.909743	-0.722012	-0.324324	-0.835726	1.29512	-0.069234	-0.22705	-0.493144	-0.462985	-0.625237	-0.357432	-0.126412	0.0865498	-0.278161	-0.339586	-0.366023	0.012611
-4.74146	2.00965	-0.632279	-0.151528	0.00957284	-0.606029	0.803168	-0.0730552	-0.546753	0.36961	0.663737	0.48445	-0.153204	0.601985	-0.591558	-0.29367	-0.168404	-0.145378	-0.35237	-0.461818	-0.170418	0.235782	-0.0917196	-0.707601	-0.0502187	-0.31822	-0.337078	-0.38286	-0.395817	-0.480357	-0.419	-0.145974	-0.0551812	0.908222	-0.722588	-0.323444	-0.836563	1.2953	-0.068338	-0.225586	-0.493786	-0.464223	-0.624796	-0.358323	-0.127049	0.0867103	-0.277555	-0.336954	-0.366664	0.0127817
-4.74048	2.0101	-0.6317	-0.150434	0.00777313	-0.606077	0.80299	-0.07194	-0.546237	0.370959	0.667021	0.482727	-0.151831	0.603407	-0.589887	-0.291858	-0.169335	-0.144963	-0.35145	-0.462172	-0.169933	0.235591	-0.0893006	-0.706608	-0.051417	-0.317335	-0.337815	-0.382097	-0.397245	-0.482819	-0.418892	-0.144281	-0.0542379	0.906687	-0.723168	-0.322561	-0.837384	1.29546	-0.0674614	-0.224116	-0.494428	-0.465455	-0.624363	-0.359219	-0.127684	0.0868509	-0.276943	-0.334306	-0.367312	0.0129422
-4.73949	2.0105	-0.631123	-0.149336	0.00597416	-0.606123	0.8028	-0.0708452	-0.545724	0.372302	0.670295	0.481015	-0.150467	0.604792	-0.58822	-0.290033	-0.17027	-0.144553	-0.350526	-0.46253	-0.169444	0.235401	-0.0868813	-0.7056	-0.052618	-0.316436	-0.338542	-0.381313	-0.398668	-0.485277	-0.418787	-0.142591	-0.0532968	0.905139	-0.723752	-0.321675	-0.838188	1.29561	-0.0666042	-0.222639	-0.49507	-0.466681	-0.623938	-0.360118	-0.128318	0.0869714	-0.276324	-0.33164	-0.367967	0.0130925
-4.73851	2.01086	-0.63055	-0.148234	0.00417606	-0.606169	0.802597	-0.0697711	-0.545214	0.373638	0.673557	0.479314	-0.149114	0.60614	-0.586559	-0.288194	-0.171209	-0.144148	-0.3496	-0.462894	-0.168951	0.235214	-0.084462	-0.704578	-0.0538218	-0.315524	-0.339259	-0.380509	-0.400086	-0.48773	-0.418684	-0.140905	-0.052358	0.903579	-0.72434	-0.320785	-0.838975	1.29575	-0.0657662	-0.221155	-0.49571	-0.467902	-0.623521	-0.36102	-0.12895	0.0870719	-0.275699	-0.328957	-0.36863	0.0132326
-4.73753	2.01117	-0.62998	-0.14713	0.00237892	-0.606214	0.802382	-0.0687179	-0.544706	0.374968	0.676807	0.477623	-0.147771	0.607449	-0.584904	-0.286341	-0.172152	-0.143748	-0.34867	-0.463263	-0.168455	0.235028	-0.0820427	-0.703542	-0.0550286	-0.314598	-0.339965	-0.379683	-0.401499	-0.490178	-0.418582	-0.139223	-0.0514215	0.902006	-0.724932	-0.319893	-0.839745	1.29587	-0.0649476	-0.219665	-0.49635	-0.469118	-0.623114	-0.361926	-0.129579	0.0871523	-0.275068	-0.326257	-0.369299	0.0133627
-4.73655	2.01143	-0.629413	-0.146022	0.000582869	-0.606258	0.802155	-0.0676858	-0.5442	0.376291	0.680046	0.475943	-0.146439	0.608721	-0.583254	-0.284476	-0.173099	-0.143352	-0.347737	-0.463636	-0.167954	0.234844	-0.0796236	-0.702491	-0.0562383	-0.313659	-0.340661	-0.378836	-0.402908	-0.492621	-0.418484	-0.137545	-0.0504874	0.90042	-0.725528	-0.318998	-0.840498	1.29598	-0.0641482	-0.218168	-0.496989	-0.470327	-0.622714	-0.362834	-0.130207	0.0872128	-0.274431	-0.323539	-0.369976	0.0134828
-4.73556	2.01165	-0.628848	-0.144911	-0.00121199	-0.606301	0.801916	-0.0666752	-0.543697	0.377607	0.683272	0.474273	-0.145118	0.609954	-0.58161	-0.282598	-0.174051	-0.142962	-0.346801	-0.464014	-0.167449	0.234662	-0.0772048	-0.701426	-0.0574509	-0.312706	-0.341346	-0.377969	-0.404311	-0.495059	-0.418387	-0.135871	-0.0495558	0.898821	-0.726129	-0.3181	-0.841234	1.29607	-0.0633681	-0.216666	-0.497627	-0.471532	-0.622323	-0.363746	-0.130832	0.0872533	-0.273788	-0.320803	-0.37066	0.0135931
-4.73458	2.01182	-0.628288	-0.143797	-0.00300556	-0.606343	0.801665	-0.0656861	-0.543196	0.378916	0.686486	0.472614	-0.143808	0.611149	-0.579972	-0.280708	-0.175006	-0.142577	-0.345862	-0.464397	-0.166939	0.234482	-0.0747865	-0.700346	-0.0586666	-0.311741	-0.342021	-0.37708	-0.405709	-0.497492	-0.418293	-0.134201	-0.0486266	0.89721	-0.726734	-0.317199	-0.841952	1.29615	-0.0626073	-0.215158	-0.498264	-0.47273	-0.621941	-0.364661	-0.131455	0.0872739	-0.273139	-0.318049	-0.37135	0.0136937
-4.7336	2.01195	-0.62773	-0.142681	-0.00479772	-0.606383	0.801402	-0.0647189	-0.542697	0.380219	0.689687	0.470965	-0.14251	0.612305	-0.57834	-0.278805	-0.175965	-0.142196	-0.344921	-0.464784	-0.166425	0.234304	-0.0723687	-0.699253	-0.0598853	-0.310763	-0.342685	-0.376172	-0.407101	-0.499918	-0.418202	-0.132536	-0.0476998	0.895586	-0.727343	-0.316295	-0.842653	1.29622	-0.0618656	-0.213645	-0.498899	-0.473924	-0.621567	-0.365579	-0.132076	0.0872745	-0.272485	-0.315278	-0.372048	0.0137847
-4.73261	2.01203	-0.627176	-0.141562	-0.00658837	-0.606422	0.801128	-0.0637739	-0.5422	0.381514	0.692875	0.469327	-0.141223	0.613422	-0.576714	-0.27689	-0.176929	-0.141821	-0.343976	-0.465175	-0.165907	0.234127	-0.0699518	-0.698145	-0.061107	-0.309773	-0.343338	-0.375242	-0.408488	-0.502339	-0.418113	-0.130875	-0.0467756	0.89395	-0.727956	-0.315389	-0.843336	1.29627	-0.0611432	-0.212126	-0.499534	-0.475112	-0.621201	-0.3665	-0.132695	0.0872553	-0.271825	-0.312489	-0.372752	0.0138662
-4.73163	2.01207	-0.626625	-0.14044	-0.00837741	-0.60646	0.800842	-0.0628511	-0.541704	0.382803	0.696049	0.4677	-0.139947	0.6145	-0.575095	-0.274962	-0.177896	-0.14145	-0.343029	-0.46557	-0.165384	0.233952	-0.0675357	-0.697023	-0.0623319	-0.30877	-0.34398	-0.374292	-0.409869	-0.504754	-0.418027	-0.129219	-0.045854	0.892301	-0.728573	-0.314479	-0.844002	1.29631	-0.06044	-0.210602	-0.500167	-0.476294	-0.620844	-0.367424	-0.133311	0.0872161	-0.27116	-0.309681	-0.373462	0.0139382
-4.73065	2.01206	-0.626078	-0.139317	-0.0101647	-0.606496	0.800545	-0.0619509	-0.541211	0.384084	0.699211	0.466082	-0.138684	0.615538	-0.573481	-0.273023	-0.178867	-0.141085	-0.342079	-0.465969	-0.164856	0.233778	-0.0651206	-0.695887	-0.06356	-0.307755	-0.34461	-0.373322	-0.411245	-0.507162	-0.417944	-0.127567	-0.044935	0.89064	-0.729195	-0.313567	-0.84465	1.29633	-0.059756	-0.209074	-0.500799	-0.477472	-0.620495	-0.36835	-0.133925	0.0871571	-0.27049	-0.306856	-0.374179	0.0140009
-4.72966	2.012	-0.625534	-0.138191	-0.0119502	-0.606531	0.800237	-0.0610734	-0.540719	0.385358	0.702358	0.464476	-0.137434	0.616537	-0.571875	-0.271073	-0.179842	-0.140725	-0.341127	-0.466372	-0.164323	0.233606	-0.0627066	-0.694737	-0.0647912	-0.306728	-0.345229	-0.372332	-0.412615	-0.509564	-0.417865	-0.125921	-0.0440186	0.888967	-0.729821	-0.312652	-0.845279	1.29634	-0.059091	-0.207541	-0.50143	-0.478644	-0.620155	-0.369279	-0.134536	0.0870783	-0.269815	-0.304012	-0.374903	0.0140544
-4.72868	2.0119	-0.624994	-0.137064	-0.0137338	-0.606564	0.799917	-0.060219	-0.540229	0.386624	0.705492	0.46288	-0.136195	0.617495	-0.570274	-0.26911	-0.180821	-0.140369	-0.340172	-0.466779	-0.163785	0.233435	-0.060294	-0.693573	-0.0660257	-0.305689	-0.345837	-0.371321	-0.413979	-0.511959	-0.417788	-0.12428	-0.0431048	0.887282	-0.730451	-0.311735	-0.845891	1.29634	-0.0584452	-0.206003	-0.502059	-0.479811	-0.619823	-0.370211	-0.135144	0.0869797	-0.269134	-0.30115	-0.375633	0.0140988
-4.7277	2.01175	-0.624458	-0.135935	-0.0155153	-0.606595	0.799586	-0.0593877	-0.539741	0.387883	0.708611	0.461294	-0.13497	0.618414	-0.568681	-0.267137	-0.181803	-0.140019	-0.339214	-0.467189	-0.163243	0.233266	-0.0578828	-0.692395	-0.0672635	-0.304639	-0.346433	-0.37029	-0.415337	-0.514347	-0.417715	-0.122644	-0.0421938	0.885584	-0.731086	-0.310815	-0.846484	1.29632	-0.0578184	-0.204462	-0.502687	-0.480973	-0.619499	-0.371145	-0.13575	0.0868614	-0.268449	-0.298269	-0.376369	0.0141341
-4.72671	2.01156	-0.623926	-0.134804	-0.0172948	-0.606625	0.799245	-0.0585798	-0.539253	0.389135	0.711715	0.459718	-0.133757	0.619292	-0.567094	-0.265152	-0.182789	-0.139673	-0.338254	-0.467603	-0.162695	0.233098	-0.0554731	-0.691203	-0.0685046	-0.303576	-0.347017	-0.369239	-0.416689	-0.516728	-0.417645	-0.121014	-0.0412856	0.883874	-0.731724	-0.309892	-0.84706	1.29629	-0.0572106	-0.202916	-0.503313	-0.482129	-0.619184	-0.372082	-0.136353	0.0867234	-0.267759	-0.29537	-0.377112	0.0141606
-4.72573	2.01132	-0.623398	-0.133671	-0.019072	-0.606652	0.798892	-0.0577956	-0.538767	0.390379	0.714805	0.458153	-0.132557	0.62013	-0.565514	-0.263157	-0.183779	-0.139333	-0.337292	-0.46802	-0.162141	0.232931	-0.0530652	-0.689997	-0.069749	-0.302503	-0.347589	-0.368168	-0.418035	-0.519102	-0.417579	-0.119389	-0.0403801	0.882153	-0.732367	-0.308966	-0.847616	1.29624	-0.0566218	-0.201367	-0.503937	-0.483281	-0.618877	-0.373021	-0.136954	0.0865656	-0.267065	-0.292452	-0.37786	0.0141782
-4.72475	2.01104	-0.622874	-0.132538	-0.0208468	-0.606678	0.798529	-0.0570352	-0.538282	0.391615	0.71788	0.456598	-0.131371	0.620927	-0.563941	-0.261151	-0.184773	-0.138998	-0.336327	-0.46844	-0.161583	0.232765	-0.0506591	-0.688778	-0.0709969	-0.301418	-0.348149	-0.367078	-0.419374	-0.521468	-0.417516	-0.117771	-0.0394775	0.880419	-0.733015	-0.308038	-0.848155	1.29618	-0.056052	-0.199814	-0.50456	-0.484427	-0.618578	-0.373963	-0.137551	0.0863883	-0.266365	-0.289516	-0.378615	0.0141871
-4.72377	2.01071	-0.622354	-0.131403	-0.0226193	-0.606702	0.798155	-0.0562988	-0.537798	0.392843	0.720939	0.455054	-0.130198	0.621684	-0.562375	-0.259134	-0.18577	-0.138668	-0.33536	-0.468862	-0.161019	0.2326	-0.048255	-0.687544	-0.0722481	-0.300322	-0.348697	-0.365968	-0.420707	-0.523826	-0.417457	-0.116158	-0.0385777	0.878674	-0.733667	-0.307107	-0.848674	1.2961	-0.0555011	-0.198258	-0.505181	-0.485569	-0.618287	-0.374907	-0.138146	0.0861914	-0.265662	-0.28656	-0.379375	0.0141874
-4.72278	2.01034	-0.621838	-0.130268	-0.0243893	-0.606723	0.79777	-0.0555867	-0.537315	0.394063	0.723983	0.453519	-0.129039	0.622399	-0.560817	-0.257107	-0.18677	-0.138343	-0.334391	-0.469288	-0.160449	0.232437	-0.045853	-0.686297	-0.0735029	-0.299216	-0.349233	-0.364838	-0.422034	-0.526177	-0.417402	-0.114551	-0.0376808	0.876917	-0.734323	-0.306174	-0.849175	1.29602	-0.054969	-0.196699	-0.5058	-0.486706	-0.618005	-0.375853	-0.138738	0.0859749	-0.264954	-0.283586	-0.380141	0.0141792
-4.7218	2.00993	-0.621326	-0.129132	-0.0261566	-0.606743	0.797376	-0.054899	-0.536833	0.395275	0.727011	0.451995	-0.127894	0.623072	-0.559265	-0.25507	-0.187774	-0.138023	-0.33342	-0.469716	-0.159873	0.232274	-0.0434533	-0.685036	-0.0747611	-0.298099	-0.349756	-0.363688	-0.423354	-0.528519	-0.417351	-0.11295	-0.0367868	0.875148	-0.734983	-0.305238	-0.849657	1.29591	-0.0544558	-0.195138	-0.506417	-0.487838	-0.617731	-0.376801	-0.139326	0.085739	-0.264242	-0.280592	-0.380913	0.0141626
-4.72082	2.00946	-0.620819	-0.127995	-0.0279212	-0.60676	0.796971	-0.0542359	-0.536351	0.396479	0.730024	0.450481	-0.126763	0.623705	-0.557722	-0.253023	-0.188781	-0.137708	-0.332446	-0.470147	-0.159292	0.232113	-0.0410561	-0.683761	-0.0760229	-0.296971	-0.350267	-0.36252	-0.424667	-0.530852	-0.417305	-0.111356	-0.0358959	0.873367	-0.735648	-0.3043	-0.850121	1.2958	-0.0539613	-0.193573	-0.507032	-0.488965	-0.617464	-0.37775	-0.139912	0.0854836	-0.263526	-0.27758	-0.38169	0.0141377
-4.71983	2.00896	-0.620316	-0.126857	-0.0296831	-0.606774	0.796555	-0.0535976	-0.53587	0.397675	0.733019	0.448976	-0.125646	0.624295	-0.556185	-0.250966	-0.189792	-0.137398	-0.331471	-0.47058	-0.158705	0.231952	-0.0386613	-0.682473	-0.0772883	-0.295833	-0.350765	-0.361332	-0.425974	-0.533178	-0.417262	-0.109768	-0.0350079	0.871575	-0.736317	-0.303359	-0.850565	1.29566	-0.0534855	-0.192006	-0.507645	-0.490087	-0.617207	-0.378702	-0.140494	0.0852088	-0.262806	-0.274548	-0.382473	0.0141046
-4.71885	2.00841	-0.619817	-0.12572	-0.0314421	-0.606787	0.79613	-0.0529843	-0.53539	0.398862	0.735999	0.447482	-0.124544	0.624844	-0.554656	-0.2489	-0.190806	-0.137094	-0.330494	-0.471016	-0.158112	0.231792	-0.0362693	-0.681172	-0.0785573	-0.294686	-0.35125	-0.360125	-0.427273	-0.535494	-0.417224	-0.108186	-0.034123	0.869772	-0.736991	-0.302416	-0.85099	1.29552	-0.0530284	-0.190438	-0.508256	-0.491205	-0.616957	-0.379656	-0.141073	0.0849147	-0.262082	-0.271497	-0.383262	0.0140634
-4.71787	2.00781	-0.619324	-0.124582	-0.0331981	-0.606797	0.795695	-0.0523962	-0.53491	0.400041	0.738961	0.445998	-0.123456	0.625351	-0.553135	-0.246825	-0.191823	-0.136794	-0.329515	-0.471453	-0.157513	0.231633	-0.0338802	-0.679856	-0.0798299	-0.293528	-0.351723	-0.358899	-0.428566	-0.537802	-0.41719	-0.106612	-0.0332412	0.867957	-0.737669	-0.301471	-0.851396	1.29536	-0.0525899	-0.188867	-0.508865	-0.492318	-0.616715	-0.380612	-0.141649	0.0846013	-0.261354	-0.268427	-0.384056	0.0140143
-4.71688	2.00717	-0.618834	-0.123445	-0.034951	-0.606804	0.79525	-0.0518334	-0.53443	0.401212	0.741907	0.444524	-0.122383	0.625816	-0.551621	-0.24474	-0.192844	-0.1365	-0.328534	-0.471892	-0.156908	0.231475	-0.031494	-0.678528	-0.0811063	-0.29236	-0.352182	-0.357654	-0.429851	-0.5401	-0.41716	-0.105044	-0.0323625	0.866131	-0.738351	-0.300523	-0.851782	1.29518	-0.05217	-0.187294	-0.509471	-0.493427	-0.616481	-0.381569	-0.142221	0.0842688	-0.260623	-0.265337	-0.384855	0.0139572
-4.7159	2.00649	-0.61835	-0.122307	-0.0367008	-0.606808	0.794795	-0.0512962	-0.53395	0.402373	0.744835	0.443059	-0.121326	0.626239	-0.550116	-0.242647	-0.193868	-0.136211	-0.327551	-0.472333	-0.156297	0.231318	-0.0291109	-0.677186	-0.0823863	-0.291184	-0.352628	-0.35639	-0.43113	-0.542389	-0.417135	-0.103484	-0.0314869	0.864293	-0.739038	-0.299573	-0.852149	1.295	-0.0517686	-0.18572	-0.510075	-0.494531	-0.616255	-0.382527	-0.14279	0.083917	-0.259888	-0.262228	-0.385659	0.0138923
-4.71492	2.00576	-0.61787	-0.12117	-0.0384473	-0.60681	0.794331	-0.0507847	-0.53347	0.403527	0.747745	0.441605	-0.120283	0.626619	-0.548618	-0.240545	-0.194894	-0.135927	-0.326567	-0.472775	-0.155679	0.231161	-0.0267311	-0.67583	-0.0836702	-0.289997	-0.353061	-0.355108	-0.432401	-0.544668	-0.417115	-0.101931	-0.0306146	0.862445	-0.739729	-0.298621	-0.852497	1.29479	-0.0513856	-0.184145	-0.510676	-0.495631	-0.616037	-0.383488	-0.143356	0.0835462	-0.259151	-0.259099	-0.386468	0.0138198
-4.71394	2.00499	-0.617396	-0.120034	-0.0401905	-0.606809	0.793857	-0.050299	-0.53299	0.404671	0.750638	0.44016	-0.119256	0.626957	-0.547128	-0.238435	-0.195924	-0.135649	-0.325581	-0.473219	-0.155055	0.231004	-0.0243548	-0.674462	-0.0849578	-0.288802	-0.353481	-0.353808	-0.433664	-0.546938	-0.4171	-0.100385	-0.0297455	0.860585	-0.740425	-0.297666	-0.852825	1.29458	-0.051021	-0.182569	-0.511275	-0.496726	-0.615827	-0.384449	-0.143918	0.0831563	-0.258409	-0.25595	-0.387282	0.0137396
-4.71295	2.00418	-0.616926	-0.118899	-0.0419304	-0.606805	0.793375	-0.0498395	-0.53251	0.405806	0.753514	0.438724	-0.118245	0.627252	-0.545647	-0.236316	-0.196957	-0.135375	-0.324594	-0.473664	-0.154424	0.230849	-0.021982	-0.67308	-0.0862493	-0.287598	-0.353887	-0.352489	-0.43492	-0.549198	-0.41709	-0.0988463	-0.0288797	0.858714	-0.741125	-0.296709	-0.853134	1.29434	-0.0506747	-0.180992	-0.511871	-0.497817	-0.615625	-0.385412	-0.144476	0.0827475	-0.257665	-0.252782	-0.388101	0.013652
-4.71197	2.00332	-0.616461	-0.117764	-0.0436667	-0.606798	0.792882	-0.0494061	-0.532029	0.406933	0.75637	0.437299	-0.117249	0.627504	-0.544173	-0.234189	-0.197993	-0.135107	-0.323605	-0.47411	-0.153787	0.230693	-0.0196129	-0.671685	-0.0875446	-0.286385	-0.35428	-0.351152	-0.436169	-0.551448	-0.417085	-0.0973154	-0.0280173	0.856833	-0.741829	-0.29575	-0.853423	1.2941	-0.0503466	-0.179414	-0.512464	-0.498904	-0.615431	-0.386377	-0.145031	0.0823198	-0.256918	-0.249593	-0.388924	0.013557
-4.71099	2.00242	-0.616002	-0.116631	-0.0453994	-0.606788	0.792381	-0.0489991	-0.531548	0.40805	0.759209	0.435883	-0.116269	0.627714	-0.542708	-0.232055	-0.199031	-0.134844	-0.322615	-0.474556	-0.153143	0.230539	-0.0172476	-0.670276	-0.0888438	-0.285163	-0.354659	-0.349797	-0.437409	-0.553687	-0.417085	-0.0957923	-0.0271581	0.854941	-0.742538	-0.294789	-0.853692	1.29384	-0.0500368	-0.177836	-0.513054	-0.499986	-0.615244	-0.387342	-0.145582	0.0818733	-0.256168	-0.246385	-0.389753	0.0134546
-4.71	2.00148	-0.615547	-0.115499	-0.0471285	-0.606775	0.791871	-0.0486186	-0.531067	0.409159	0.762029	0.434476	-0.115306	0.62788	-0.541251	-0.229913	-0.200073	-0.134587	-0.321623	-0.475003	-0.152492	0.230384	-0.0148863	-0.668855	-0.090147	-0.283934	-0.355024	-0.348424	-0.438642	-0.555916	-0.41709	-0.0942771	-0.0263024	0.853038	-0.743252	-0.293826	-0.853941	1.29356	-0.0497451	-0.176258	-0.513642	-0.501065	-0.615065	-0.388308	-0.14613	0.0814081	-0.255415	-0.243157	-0.390586	0.0133452
-4.70902	2.00049	-0.615098	-0.114368	-0.0488539	-0.606759	0.791352	-0.0482647	-0.530584	0.410258	0.76483	0.433079	-0.114358	0.628003	-0.539803	-0.227763	-0.201117	-0.134334	-0.32063	-0.475451	-0.151835	0.23023	-0.0125292	-0.667421	-0.0914541	-0.282696	-0.355375	-0.347033	-0.439867	-0.558135	-0.417101	-0.0927699	-0.0254501	0.851124	-0.74397	-0.292861	-0.85417	1.29327	-0.0494714	-0.17468	-0.514226	-0.502139	-0.614894	-0.389276	-0.146673	0.0809242	-0.254659	-0.239909	-0.391423	0.0132286
-4.70804	1.99947	-0.614654	-0.113239	-0.0505755	-0.606739	0.790824	-0.0479378	-0.530101	0.411348	0.767611	0.431691	-0.113427	0.628084	-0.538363	-0.225607	-0.202164	-0.134087	-0.319636	-0.475899	-0.15117	0.230076	-0.0101764	-0.665974	-0.0927653	-0.28145	-0.355712	-0.345625	-0.441084	-0.560342	-0.417117	-0.0912708	-0.0246013	0.8492	-0.744692	-0.291894	-0.854379	1.29297	-0.0492157	-0.173102	-0.514808	-0.50321	-0.61473	-0.390244	-0.147213	0.0804217	-0.253901	-0.23664	-0.392264	0.013105
-4.70705	1.99839	-0.614216	-0.112112	-0.0522931	-0.606716	0.790288	-0.0476377	-0.529617	0.412428	0.770374	0.430313	-0.112513	0.62812	-0.536932	-0.223443	-0.203214	-0.133846	-0.318641	-0.476348	-0.150499	0.229922	-0.00782796	-0.664514	-0.0940804	-0.280197	-0.356035	-0.3442	-0.442293	-0.562539	-0.417139	-0.0897801	-0.023756	0.847265	-0.745419	-0.290924	-0.854569	1.29265	-0.0489779	-0.171525	-0.515386	-0.504276	-0.614574	-0.391213	-0.147748	0.0799006	-0.253141	-0.233351	-0.39311	0.0129745
-4.70607	1.99728	-0.613783	-0.110987	-0.0540068	-0.60669	0.789743	-0.0473648	-0.529132	0.413499	0.773117	0.428943	-0.111615	0.628114	-0.535509	-0.221272	-0.204266	-0.133609	-0.317645	-0.476796	-0.14982	0.229769	-0.00548411	-0.663041	-0.0953997	-0.278936	-0.356344	-0.342757	-0.443493	-0.564724	-0.417167	-0.0882977	-0.0229143	0.84532	-0.746151	-0.289953	-0.854738	1.29232	-0.048758	-0.169948	-0.515961	-0.505339	-0.614426	-0.392183	-0.14828	0.0793612	-0.252378	-0.230043	-0.39396	0.0128373
-4.70509	1.99613	-0.613356	-0.109864	-0.0557165	-0.60666	0.78919	-0.0471192	-0.528646	0.41456	0.77584	0.427583	-0.110734	0.628064	-0.534095	-0.219095	-0.205321	-0.133378	-0.316648	-0.477244	-0.149134	0.229616	-0.00314497	-0.661555	-0.096723	-0.277667	-0.356639	-0.341297	-0.444685	-0.566898	-0.4172	-0.0868239	-0.0220762	0.843365	-0.746887	-0.28898	-0.854887	1.29197	-0.0485558	-0.168372	-0.516532	-0.506398	-0.614285	-0.393154	-0.148807	0.0788034	-0.251613	-0.226713	-0.394814	0.0126934
-4.7041	1.99493	-0.612934	-0.108743	-0.0574221	-0.606627	0.788628	-0.0469009	-0.528158	0.415612	0.778543	0.426232	-0.10987	0.62797	-0.532691	-0.216912	-0.206378	-0.133153	-0.31565	-0.477691	-0.148441	0.229462	-0.000810701	-0.660057	-0.0980505	-0.276392	-0.356919	-0.33982	-0.445869	-0.56906	-0.417239	-0.0853589	-0.0212417	0.8414	-0.747627	-0.288005	-0.855015	1.29161	-0.0483713	-0.166798	-0.517101	-0.507453	-0.614151	-0.394125	-0.149331	0.0782274	-0.250846	-0.223363	-0.395672	0.0125428
-4.70312	1.99369	-0.612518	-0.107625	-0.0591234	-0.606589	0.788059	-0.0467101	-0.527669	0.416653	0.781226	0.42489	-0.109023	0.627833	-0.531294	-0.214722	-0.207438	-0.132933	-0.314651	-0.478138	-0.14774	0.229309	0.00151857	-0.658546	-0.0993822	-0.27511	-0.357184	-0.338327	-0.447045	-0.571211	-0.417285	-0.0839026	-0.0204109	0.839424	-0.748372	-0.287028	-0.855124	1.29124	-0.0482044	-0.165224	-0.517665	-0.508505	-0.614025	-0.395096	-0.14985	0.0776332	-0.250077	-0.219993	-0.396534	0.0123858
-4.70214	1.99241	-0.612108	-0.10651	-0.0608205	-0.606548	0.787481	-0.046547	-0.527179	0.417686	0.783889	0.423556	-0.108193	0.627652	-0.529907	-0.212527	-0.208499	-0.132718	-0.313651	-0.478584	-0.147033	0.229156	0.00384269	-0.657022	-0.100718	-0.273821	-0.357435	-0.336817	-0.448211	-0.57335	-0.417336	-0.0824553	-0.0195838	0.837439	-0.749121	-0.286049	-0.855212	1.29085	-0.048055	-0.163652	-0.518226	-0.509553	-0.613906	-0.396068	-0.150365	0.0770209	-0.249307	-0.216603	-0.397399	0.0122224
-4.70116	1.99109	-0.611704	-0.105398	-0.0625133	-0.606504	0.786896	-0.0464116	-0.526686	0.418708	0.786531	0.422232	-0.107381	0.627427	-0.528529	-0.210326	-0.209564	-0.132509	-0.312651	-0.47903	-0.146317	0.229003	0.00616151	-0.655486	-0.102058	-0.272525	-0.357672	-0.335291	-0.449369	-0.575477	-0.417393	-0.081017	-0.0187605	0.835444	-0.749875	-0.285069	-0.855279	1.29045	-0.047923	-0.162082	-0.518783	-0.510598	-0.613794	-0.397041	-0.150876	0.0763906	-0.248534	-0.213191	-0.398268	0.0120526
-4.70017	1.98973	-0.611305	-0.104289	-0.0642017	-0.606455	0.786303	-0.0463042	-0.526193	0.41972	0.789152	0.420916	-0.106586	0.627158	-0.52716	-0.208119	-0.21063	-0.132305	-0.31165	-0.479474	-0.145594	0.22885	0.00847489	-0.653938	-0.103402	-0.271223	-0.357893	-0.333749	-0.450518	-0.577591	-0.417457	-0.079588	-0.0179409	0.833438	-0.750634	-0.284087	-0.855326	1.29003	-0.0478084	-0.160514	-0.519337	-0.511639	-0.61369	-0.398013	-0.151383	0.0757424	-0.24776	-0.209759	-0.399141	0.0118767
-4.69919	1.98833	-0.610913	-0.103183	-0.0658857	-0.606403	0.785702	-0.0462247	-0.525697	0.420722	0.791752	0.419609	-0.105809	0.626846	-0.525801	-0.205907	-0.211699	-0.132106	-0.310648	-0.479917	-0.144864	0.228696	0.0107827	-0.652377	-0.104751	-0.269915	-0.3581	-0.33219	-0.451658	-0.579693	-0.417527	-0.0781683	-0.0171252	0.831423	-0.751397	-0.283103	-0.855353	1.28959	-0.0477111	-0.158948	-0.519886	-0.512677	-0.613593	-0.398986	-0.151885	0.0750764	-0.246985	-0.206306	-0.400017	0.0116946
-4.69821	1.98689	-0.610527	-0.10208	-0.0675651	-0.606346	0.785094	-0.0461733	-0.525199	0.421713	0.794331	0.41831	-0.10505	0.626489	-0.52445	-0.20369	-0.21277	-0.131913	-0.309646	-0.480358	-0.144125	0.228543	0.0130848	-0.650804	-0.106104	-0.268602	-0.358291	-0.330616	-0.452789	-0.581783	-0.417604	-0.0767581	-0.0163134	0.829399	-0.752165	-0.282117	-0.855359	1.28915	-0.047631	-0.157385	-0.520432	-0.513711	-0.613502	-0.399958	-0.152382	0.0743927	-0.246208	-0.202833	-0.400896	0.0115065
-4.69722	1.9854	-0.610146	-0.100982	-0.0692399	-0.606285	0.784478	-0.0461502	-0.524699	0.422695	0.796889	0.41702	-0.104309	0.626089	-0.523109	-0.201468	-0.213842	-0.131726	-0.308644	-0.480797	-0.143379	0.228389	0.015381	-0.649219	-0.107461	-0.267282	-0.358467	-0.329026	-0.453911	-0.58386	-0.417687	-0.0753574	-0.0155055	0.827365	-0.752937	-0.28113	-0.855345	1.28869	-0.0475679	-0.155824	-0.520973	-0.514743	-0.613419	-0.400931	-0.152876	0.0736914	-0.24543	-0.199339	-0.401779	0.0113125
-4.69624	1.98388	-0.609772	-0.0998868	-0.0709101	-0.60622	0.783855	-0.0461554	-0.524197	0.423666	0.799425	0.415739	-0.103586	0.625645	-0.521777	-0.199242	-0.214917	-0.131544	-0.307641	-0.481235	-0.142625	0.228235	0.0176711	-0.647621	-0.108823	-0.265958	-0.358629	-0.327421	-0.455024	-0.585923	-0.417777	-0.0739665	-0.0147016	0.825322	-0.753713	-0.280141	-0.85531	1.28821	-0.0475219	-0.154266	-0.52151	-0.515771	-0.613343	-0.401903	-0.153364	0.0729726	-0.244651	-0.195823	-0.402664	0.0111127
-4.69526	1.98232	-0.609405	-0.0987958	-0.0725755	-0.606151	0.783225	-0.0461891	-0.523692	0.424627	0.801939	0.414466	-0.102881	0.625157	-0.520454	-0.197011	-0.215994	-0.131367	-0.306638	-0.481671	-0.141863	0.22808	0.0199551	-0.646012	-0.110189	-0.264628	-0.358775	-0.3258	-0.456127	-0.587974	-0.417874	-0.0725854	-0.0139017	0.823269	-0.754494	-0.279151	-0.855254	1.28772	-0.0474928	-0.15271	-0.522043	-0.516797	-0.613273	-0.402875	-0.153848	0.0722364	-0.24387	-0.192287	-0.403553	0.0109071
-4.69427	1.98072	-0.609043	-0.0977091	-0.0742362	-0.606078	0.782588	-0.0462512	-0.523185	0.425577	0.804431	0.4132	-0.102194	0.624624	-0.519141	-0.194776	-0.217072	-0.131196	-0.305635	-0.482104	-0.141093	0.227926	0.0222328	-0.64439	-0.111559	-0.263292	-0.358905	-0.324165	-0.457221	-0.590012	-0.417978	-0.0712143	-0.0131058	0.821207	-0.75528	-0.278159	-0.855177	1.28721	-0.0474805	-0.151158	-0.522572	-0.517819	-0.613211	-0.403847	-0.154328	0.0714829	-0.243089	-0.18873	-0.404444	0.0106959
-4.69329	1.97908	-0.608688	-0.0966268	-0.075892	-0.606	0.781945	-0.046342	-0.522676	0.426517	0.8069	0.411944	-0.101525	0.624048	-0.517838	-0.192536	-0.218153	-0.131031	-0.304631	-0.482535	-0.140315	0.227771	0.0245041	-0.642757	-0.112934	-0.261953	-0.35902	-0.322515	-0.458306	-0.592036	-0.418088	-0.0698533	-0.0123141	0.819136	-0.75607	-0.277166	-0.85508	1.28669	-0.0474849	-0.14961	-0.523096	-0.518839	-0.613155	-0.404818	-0.154802	0.0707122	-0.242307	-0.185152	-0.405339	0.0104791
-4.69231	1.9774	-0.60834	-0.0955491	-0.0775429	-0.605918	0.781294	-0.0464616	-0.522164	0.427446	0.809348	0.410695	-0.100875	0.623428	-0.516544	-0.190293	-0.219234	-0.130871	-0.303628	-0.482963	-0.139529	0.227615	0.0267687	-0.641111	-0.114313	-0.260608	-0.35912	-0.32085	-0.45938	-0.594047	-0.418206	-0.0685024	-0.0115264	0.817056	-0.756865	-0.276172	-0.854962	1.28616	-0.047506	-0.148065	-0.523615	-0.519855	-0.613105	-0.405788	-0.155273	0.0699245	-0.241525	-0.181553	-0.406236	0.0102569
-4.69133	1.97568	-0.607998	-0.0944761	-0.0791889	-0.605831	0.780637	-0.0466099	-0.521649	0.428365	0.811773	0.409454	-0.100244	0.622763	-0.51526	-0.188047	-0.220318	-0.130717	-0.302624	-0.483389	-0.138735	0.227459	0.0290266	-0.639454	-0.115697	-0.259259	-0.359204	-0.31917	-0.460446	-0.596044	-0.41833	-0.0671619	-0.010743	0.814967	-0.757665	-0.275176	-0.854824	1.28561	-0.0475436	-0.146523	-0.52413	-0.520869	-0.613063	-0.406759	-0.155738	0.0691197	-0.240741	-0.177933	-0.407135	0.0100293
-4.69034	1.97393	-0.607662	-0.0934081	-0.0808298	-0.605739	0.779973	-0.0467871	-0.521131	0.429272	0.814175	0.408221	-0.0996315	0.622055	-0.513986	-0.185797	-0.221403	-0.130569	-0.301621	-0.483811	-0.137932	0.227303	0.0312776	-0.637785	-0.117086	-0.257906	-0.359272	-0.317477	-0.461501	-0.598028	-0.418462	-0.0658319	-0.00996373	0.812869	-0.758468	-0.274178	-0.854664	1.28505	-0.0475976	-0.144986	-0.52464	-0.521881	-0.613027	-0.407728	-0.156198	0.0682981	-0.239958	-0.174292	-0.408037	0.00979638
-4.68936	1.97213	-0.607334	-0.0923452	-0.0824657	-0.605643	0.779303	-0.0469933	-0.52061	0.430169	0.816554	0.406995	-0.0990376	0.621303	-0.512721	-0.183544	-0.22249	-0.130426	-0.300617	-0.48423	-0.137121	0.227146	0.0335216	-0.636105	-0.118478	-0.256549	-0.359325	-0.315769	-0.462546	-0.599997	-0.418601	-0.0645124	-0.00918876	0.810762	-0.759277	-0.27318	-0.854484	1.28447	-0.047668	-0.143452	-0.525145	-0.522889	-0.612997	-0.408697	-0.156654	0.0674598	-0.239174	-0.170629	-0.408942	0.00955829
-4.68838	1.9703	-0.607012	-0.0912876	-0.0840965	-0.605543	0.778626	-0.0472285	-0.520086	0.431055	0.81891	0.405778	-0.0984626	0.620506	-0.511466	-0.181288	-0.223578	-0.130289	-0.299614	-0.484646	-0.136302	0.226988	0.0357584	-0.634413	-0.119876	-0.255188	-0.359362	-0.314048	-0.463581	-0.601953	-0.418748	-0.0632036	-0.00841808	0.808647	-0.76009	-0.27218	-0.854282	1.28388	-0.0477546	-0.141924	-0.525645	-0.523896	-0.612974	-0.409664	-0.157105	0.0666048	-0.23839	-0.166946	-0.409848	0.00931509
-4.68739	1.96843	-0.606697	-0.0902355	-0.085722	-0.605437	0.777944	-0.0474929	-0.519558	0.431929	0.821242	0.404568	-0.0979066	0.619666	-0.510221	-0.179029	-0.224667	-0.130157	-0.298612	-0.485058	-0.135474	0.22683	0.0379879	-0.632709	-0.121278	-0.253824	-0.359383	-0.312313	-0.464607	-0.603894	-0.418902	-0.0619057	-0.00765176	0.806523	-0.760907	-0.271179	-0.85406	1.28328	-0.0478574	-0.140399	-0.52614	-0.524899	-0.612957	-0.410631	-0.15755	0.0657333	-0.237605	-0.163241	-0.410757	0.00906686
-4.68641	1.96653	-0.606388	-0.0891891	-0.0873424	-0.605327	0.777255	-0.0477864	-0.519028	0.432793	0.823551	0.403365	-0.0973696	0.618782	-0.508986	-0.176768	-0.225758	-0.130032	-0.297609	-0.485467	-0.134638	0.226672	0.0402099	-0.630994	-0.122685	-0.252456	-0.359388	-0.310565	-0.465622	-0.60582	-0.419063	-0.0606186	-0.00688983	0.804391	-0.761729	-0.270177	-0.853817	1.28266	-0.0479762	-0.138879	-0.52663	-0.525901	-0.612947	-0.411596	-0.157991	0.0648454	-0.236821	-0.159515	-0.411668	0.00881371
-4.68543	1.96458	-0.606087	-0.0881485	-0.0889575	-0.605211	0.77656	-0.0481092	-0.518493	0.433645	0.825837	0.40217	-0.0968518	0.617853	-0.507761	-0.174505	-0.226849	-0.129912	-0.296607	-0.485871	-0.133793	0.226512	0.0424244	-0.629268	-0.124096	-0.251086	-0.359376	-0.308803	-0.466626	-0.607732	-0.419233	-0.0593426	-0.00613233	0.80225	-0.762556	-0.269174	-0.853554	1.28202	-0.0481109	-0.137365	-0.527114	-0.5269	-0.612942	-0.412561	-0.158427	0.0639412	-0.236037	-0.155767	-0.412581	0.0085557
-4.68444	1.9626	-0.605792	-0.0871141	-0.0905673	-0.605091	0.77586	-0.0484614	-0.517956	0.434487	0.828098	0.400982	-0.0963532	0.616881	-0.506546	-0.172239	-0.227942	-0.129797	-0.295606	-0.486271	-0.132939	0.226352	0.044631	-0.62753	-0.125512	-0.249712	-0.359349	-0.307029	-0.467621	-0.60963	-0.41941	-0.0580778	-0.00537931	0.800102	-0.763387	-0.26817	-0.853269	1.28137	-0.0482615	-0.135855	-0.527593	-0.527897	-0.612944	-0.413524	-0.158857	0.0630209	-0.235252	-0.151999	-0.413496	0.00829293
-4.68346	1.96059	-0.605505	-0.0860858	-0.0921716	-0.604966	0.775154	-0.0488429	-0.517414	0.435317	0.830336	0.399801	-0.0958739	0.615865	-0.50534	-0.169972	-0.229036	-0.129689	-0.294605	-0.486667	-0.132077	0.226191	0.0468298	-0.625781	-0.126932	-0.248336	-0.359306	-0.305242	-0.468604	-0.611512	-0.419594	-0.0568243	-0.00463081	0.797945	-0.764222	-0.267164	-0.852963	1.28071	-0.0484278	-0.13435	-0.528067	-0.528892	-0.612952	-0.414486	-0.159283	0.0620846	-0.234469	-0.148208	-0.414412	0.00802548
-4.68248	1.95854	-0.605225	-0.085064	-0.0937706	-0.604835	0.774443	-0.0492538	-0.516869	0.436135	0.83255	0.398627	-0.0954139	0.614806	-0.504145	-0.167702	-0.230131	-0.129586	-0.293605	-0.487058	-0.131206	0.22603	0.0490205	-0.624021	-0.128357	-0.246957	-0.359246	-0.303443	-0.469578	-0.61338	-0.419787	-0.0555821	-0.00388688	0.79578	-0.765062	-0.266158	-0.852637	1.28003	-0.0486097	-0.132851	-0.528535	-0.529885	-0.612966	-0.415446	-0.159703	0.0611323	-0.233685	-0.144397	-0.41533	0.00775343
-4.6815	1.95645	-0.604952	-0.0840488	-0.0953641	-0.6047	0.773726	-0.0496942	-0.51632	0.436942	0.834739	0.39746	-0.0949734	0.613702	-0.50296	-0.165432	-0.231227	-0.12949	-0.292605	-0.487445	-0.130327	0.225868	0.0512031	-0.62225	-0.129787	-0.245576	-0.35917	-0.301631	-0.47054	-0.615233	-0.419987	-0.0543515	-0.00314755	0.793607	-0.765907	-0.265151	-0.852289	1.27934	-0.0488071	-0.131358	-0.528997	-0.530877	-0.612985	-0.416405	-0.160118	0.0601643	-0.232903	-0.140564	-0.41625	0.00747686
-4.68051	1.95433	-0.604686	-0.0830404	-0.0969521	-0.604559	0.773003	-0.0501641	-0.515766	0.437738	0.836903	0.3963	-0.0945525	0.612555	-0.501786	-0.16316	-0.232324	-0.129399	-0.291606	-0.487827	-0.129438	0.225705	0.0533773	-0.620468	-0.131222	-0.244193	-0.359077	-0.299807	-0.471492	-0.61707	-0.420196	-0.0531325	-0.00241288	0.791426	-0.766756	-0.264143	-0.851921	1.27863	-0.0490199	-0.12987	-0.529454	-0.531866	-0.613011	-0.417362	-0.160528	0.0591806	-0.23212	-0.13671	-0.417171	0.00719587
-4.67953	1.95217	-0.604427	-0.082039	-0.0985346	-0.604412	0.772276	-0.0506636	-0.515209	0.438522	0.839043	0.395147	-0.094151	0.611365	-0.500621	-0.160887	-0.233421	-0.129313	-0.290608	-0.488203	-0.128541	0.225541	0.0555431	-0.618676	-0.132661	-0.242808	-0.358968	-0.297972	-0.472433	-0.618892	-0.420413	-0.0519252	-0.00168291	0.789238	-0.767609	-0.263134	-0.851532	1.27791	-0.049248	-0.128388	-0.529904	-0.532853	-0.613042	-0.418318	-0.160932	0.0581814	-0.231339	-0.132835	-0.418093	0.00691051
-4.67855	1.94998	-0.604176	-0.0810447	-0.100111	-0.604261	0.771543	-0.0511928	-0.514648	0.439294	0.841158	0.394	-0.0937692	0.610131	-0.499467	-0.158614	-0.234519	-0.129234	-0.289612	-0.488574	-0.127635	0.225376	0.0577003	-0.616872	-0.134106	-0.241421	-0.358843	-0.296125	-0.473362	-0.620699	-0.420638	-0.0507298	-0.000957679	0.787042	-0.768467	-0.262124	-0.851122	1.27718	-0.0494913	-0.126913	-0.530349	-0.533839	-0.613079	-0.419271	-0.161332	0.0571668	-0.230558	-0.128938	-0.419017	0.00662089
-4.67756	1.94775	-0.603932	-0.0800578	-0.101683	-0.604104	0.770806	-0.0517515	-0.514082	0.440055	0.843249	0.39286	-0.0934071	0.608853	-0.498323	-0.156339	-0.235618	-0.129161	-0.288616	-0.48894	-0.126719	0.22521	0.0598487	-0.615058	-0.135554	-0.240033	-0.358701	-0.294267	-0.474281	-0.62249	-0.420871	-0.0495463	-0.000237235	0.784839	-0.76933	-0.261114	-0.850691	1.27643	-0.0497497	-0.125443	-0.530787	-0.534823	-0.613121	-0.420223	-0.161726	0.056137	-0.229779	-0.12502	-0.419941	0.00632707
-4.67658	1.94549	-0.603696	-0.0790785	-0.103248	-0.603942	0.770063	-0.05234	-0.513511	0.440804	0.845314	0.391727	-0.0930647	0.607533	-0.497189	-0.154065	-0.236717	-0.129093	-0.287621	-0.489299	-0.125795	0.225044	0.0619883	-0.613233	-0.137008	-0.238644	-0.358542	-0.292398	-0.475189	-0.624265	-0.421112	-0.0483749	0.000478379	0.782628	-0.770197	-0.260103	-0.850239	1.27566	-0.050023	-0.123981	-0.531219	-0.535806	-0.613169	-0.421173	-0.162114	0.0550921	-0.229	-0.12108	-0.420867	0.00602914
-4.6756	1.9432	-0.603467	-0.0781068	-0.104808	-0.603774	0.769316	-0.0529581	-0.512937	0.441541	0.847354	0.390599	-0.0927421	0.606169	-0.496065	-0.15179	-0.237817	-0.129032	-0.286627	-0.489653	-0.124862	0.224876	0.0641188	-0.611398	-0.138467	-0.237254	-0.358367	-0.290518	-0.476085	-0.626025	-0.421362	-0.0472157	0.00118912	0.78041	-0.771068	-0.259091	-0.849766	1.27488	-0.0503111	-0.122524	-0.531645	-0.536787	-0.613222	-0.42212	-0.162497	0.0540321	-0.228223	-0.117119	-0.421794	0.00572716
-4.67461	1.94087	-0.603245	-0.077143	-0.106362	-0.6036	0.768565	-0.053606	-0.512357	0.442266	0.849368	0.389478	-0.0924394	0.604762	-0.494952	-0.149515	-0.238917	-0.128976	-0.285635	-0.490001	-0.123919	0.224708	0.0662401	-0.609552	-0.13993	-0.235863	-0.358175	-0.288627	-0.47697	-0.627768	-0.42162	-0.0460688	0.00189494	0.778185	-0.771944	-0.258078	-0.849272	1.27409	-0.050614	-0.121075	-0.532064	-0.537767	-0.61328	-0.423066	-0.162875	0.0529574	-0.227447	-0.113136	-0.422721	0.00542123
-4.67363	1.93851	-0.603032	-0.0761874	-0.107911	-0.603421	0.767808	-0.0542836	-0.511773	0.442979	0.851357	0.388363	-0.0921565	0.603311	-0.493849	-0.14724	-0.240017	-0.128927	-0.284643	-0.490342	-0.122968	0.224539	0.0683522	-0.607696	-0.141398	-0.234471	-0.357966	-0.286726	-0.477844	-0.629496	-0.421887	-0.0449342	0.00259579	0.775952	-0.772824	-0.257066	-0.848758	1.27328	-0.0509315	-0.119633	-0.532477	-0.538745	-0.613344	-0.424009	-0.163247	0.0518679	-0.226672	-0.109132	-0.423649	0.0051114
-4.67265	1.93612	-0.602826	-0.07524	-0.109453	-0.603237	0.767048	-0.054991	-0.511184	0.44368	0.853321	0.387254	-0.0918935	0.601818	-0.492757	-0.144966	-0.241117	-0.128884	-0.283654	-0.490677	-0.122007	0.224368	0.0704548	-0.605829	-0.142871	-0.233079	-0.35774	-0.284815	-0.478706	-0.631207	-0.422162	-0.0438122	0.00329163	0.773713	-0.773709	-0.256052	-0.848223	1.27246	-0.0512634	-0.118197	-0.532883	-0.539722	-0.613413	-0.424949	-0.163613	0.0507639	-0.225898	-0.105107	-0.424578	0.00479776
-4.67166	1.93369	-0.602627	-0.074301	-0.11099	-0.603046	0.766283	-0.0557283	-0.51059	0.444369	0.855258	0.386151	-0.0916504	0.600283	-0.491675	-0.142692	-0.242218	-0.128846	-0.282665	-0.491005	-0.121037	0.224197	0.0725478	-0.603953	-0.144348	-0.231688	-0.357498	-0.282895	-0.479557	-0.632902	-0.422446	-0.0427028	0.00398242	0.771467	-0.774598	-0.255038	-0.847667	1.27163	-0.0516098	-0.116769	-0.533282	-0.540699	-0.613487	-0.425888	-0.163974	0.0496454	-0.225127	-0.10106	-0.425508	0.00448037
-4.67068	1.93124	-0.602437	-0.0733707	-0.112521	-0.60285	0.765514	-0.0564953	-0.509991	0.445046	0.85717	0.385053	-0.0914273	0.598704	-0.490603	-0.14042	-0.243319	-0.128815	-0.281678	-0.491326	-0.120058	0.224025	0.0746311	-0.602066	-0.145831	-0.230296	-0.357238	-0.280964	-0.480396	-0.634581	-0.422739	-0.0416061	0.00466811	0.769214	-0.775491	-0.254024	-0.84709	1.27078	-0.0519704	-0.115348	-0.533675	-0.541674	-0.613566	-0.426823	-0.16433	0.0485127	-0.224357	-0.0969923	-0.426437	0.00415932
-4.6697	1.92875	-0.602254	-0.0724492	-0.114045	-0.602648	0.764741	-0.0572921	-0.509387	0.445711	0.859055	0.383962	-0.0912243	0.597083	-0.489542	-0.138148	-0.244419	-0.12879	-0.280693	-0.491641	-0.119069	0.223851	0.0767046	-0.600169	-0.147318	-0.228904	-0.356962	-0.279025	-0.481223	-0.636243	-0.423041	-0.0405223	0.00534866	0.766954	-0.776389	-0.253009	-0.846493	1.26991	-0.0523451	-0.113935	-0.53406	-0.542648	-0.61365	-0.427757	-0.16468	0.0473659	-0.223588	-0.0929028	-0.427367	0.00383467
-4.66872	1.92623	-0.602079	-0.0715367	-0.115564	-0.60244	0.763964	-0.0581187	-0.508777	0.446363	0.860914	0.382875	-0.0910412	0.59542	-0.488491	-0.135877	-0.24552	-0.128771	-0.279709	-0.491947	-0.118072	0.223677	0.078768	-0.598263	-0.14881	-0.227513	-0.356669	-0.277076	-0.482038	-0.637889	-0.423351	-0.0394513	0.00602402	0.764688	-0.777291	-0.251995	-0.845875	1.26903	-0.0527339	-0.11253	-0.534438	-0.543621	-0.613738	-0.428687	-0.165024	0.046205	-0.222822	-0.088792	-0.428298	0.0035065
-4.66773	1.92368	-0.601912	-0.0706333	-0.117077	-0.602226	0.763183	-0.0589751	-0.508163	0.447003	0.862747	0.381794	-0.0908782	0.593714	-0.487451	-0.133608	-0.24662	-0.128758	-0.278727	-0.492247	-0.117064	0.223501	0.0808213	-0.596346	-0.150307	-0.226123	-0.356358	-0.275119	-0.482841	-0.639518	-0.42367	-0.0383935	0.00669414	0.762416	-0.778198	-0.250979	-0.845236	1.26814	-0.0531365	-0.111132	-0.534809	-0.544593	-0.613832	-0.429614	-0.165362	0.0450304	-0.222058	-0.0846599	-0.429228	0.00317486
-4.66675	1.9211	-0.601752	-0.0697394	-0.118584	-0.602006	0.762399	-0.0598613	-0.507543	0.447631	0.864554	0.380719	-0.0907353	0.591966	-0.486422	-0.131341	-0.24772	-0.128751	-0.277747	-0.492538	-0.116048	0.223325	0.0828644	-0.59442	-0.151809	-0.224733	-0.35603	-0.273153	-0.483632	-0.64113	-0.423999	-0.0373487	0.00735899	0.760137	-0.779108	-0.249964	-0.844577	1.26723	-0.053553	-0.109743	-0.535173	-0.545565	-0.61393	-0.430539	-0.165695	0.043842	-0.221295	-0.0805064	-0.430158	0.00283983
-4.66577	1.91849	-0.601601	-0.0688549	-0.120085	-0.60178	0.761611	-0.0607773	-0.506917	0.448247	0.866334	0.379648	-0.0906124	0.590177	-0.485402	-0.129075	-0.248819	-0.12875	-0.276769	-0.492822	-0.115022	0.223147	0.084897	-0.592484	-0.153316	-0.223345	-0.355686	-0.271179	-0.484412	-0.642725	-0.424336	-0.0363172	0.00801851	0.757851	-0.780023	-0.248948	-0.843897	1.26631	-0.053983	-0.108361	-0.535529	-0.546536	-0.614032	-0.43146	-0.166022	0.0426401	-0.220535	-0.0763317	-0.431089	0.00250148
-4.66478	1.91585	-0.601458	-0.0679802	-0.12158	-0.601549	0.760819	-0.0617232	-0.506286	0.44885	0.868087	0.378583	-0.0905096	0.588345	-0.484394	-0.126812	-0.249919	-0.128756	-0.275792	-0.493098	-0.113986	0.222968	0.0869191	-0.590539	-0.154828	-0.221958	-0.355324	-0.269197	-0.485178	-0.644303	-0.424682	-0.035299	0.00867266	0.75556	-0.780943	-0.247933	-0.843196	1.26537	-0.0544266	-0.106988	-0.535878	-0.547506	-0.614139	-0.432379	-0.166343	0.0414248	-0.219777	-0.0721357	-0.432019	0.00215988
-4.6638	1.91318	-0.601323	-0.0671153	-0.123069	-0.601311	0.760024	-0.0626987	-0.50565	0.44944	0.869814	0.377522	-0.0904269	0.586472	-0.483396	-0.12455	-0.251017	-0.128768	-0.274818	-0.493366	-0.112941	0.222788	0.0889305	-0.588584	-0.156344	-0.220573	-0.354945	-0.267207	-0.485933	-0.645864	-0.425038	-0.0342943	0.0093214	0.753263	-0.781866	-0.246917	-0.842475	1.26442	-0.0548837	-0.105624	-0.536219	-0.548476	-0.61425	-0.433294	-0.166658	0.0401963	-0.219022	-0.0679184	-0.432948	0.00181508
-4.66282	1.91048	-0.601196	-0.0662605	-0.124552	-0.601066	0.759226	-0.0637041	-0.505007	0.450018	0.871513	0.376467	-0.0903644	0.584557	-0.482408	-0.122291	-0.252115	-0.128786	-0.273846	-0.493625	-0.111887	0.222607	0.0909311	-0.58662	-0.157865	-0.219189	-0.354548	-0.26521	-0.486675	-0.647408	-0.425402	-0.0333031	0.00996468	0.750959	-0.782794	-0.245902	-0.841734	1.26346	-0.055354	-0.104268	-0.536552	-0.549446	-0.614366	-0.434206	-0.166968	0.0389548	-0.218269	-0.06368	-0.433878	0.00146715
-4.66183	1.90775	-0.601077	-0.065416	-0.126029	-0.600816	0.758425	-0.0647391	-0.504359	0.450583	0.873186	0.375416	-0.0903219	0.582601	-0.481431	-0.120035	-0.253213	-0.128811	-0.272875	-0.493875	-0.110823	0.222425	0.0929208	-0.584646	-0.159392	-0.217807	-0.354135	-0.263206	-0.487405	-0.648935	-0.425776	-0.0323256	0.0106025	0.74865	-0.783726	-0.244886	-0.840972	1.26248	-0.0558374	-0.10292	-0.536877	-0.550415	-0.614485	-0.435115	-0.167272	0.0377003	-0.217518	-0.0594204	-0.434807	0.00111616
-4.66085	1.905	-0.600967	-0.0645819	-0.127499	-0.60056	0.757621	-0.0658039	-0.503705	0.451136	0.874832	0.374369	-0.0902995	0.580605	-0.480465	-0.117781	-0.254309	-0.128841	-0.271907	-0.494117	-0.10975	0.222242	0.0948994	-0.582663	-0.160923	-0.216428	-0.353704	-0.261194	-0.488122	-0.650444	-0.42616	-0.0313618	0.0112347	0.746335	-0.784662	-0.24387	-0.84019	1.26149	-0.0563339	-0.101582	-0.537194	-0.551384	-0.614609	-0.43602	-0.16757	0.036433	-0.216771	-0.0551397	-0.435735	0.000762168
-4.65987	1.90222	-0.600865	-0.0637583	-0.128964	-0.600297	0.756814	-0.0668984	-0.503044	0.451676	0.87645	0.373327	-0.0902972	0.578567	-0.479509	-0.115531	-0.255405	-0.128879	-0.270941	-0.494349	-0.108667	0.222058	0.0968668	-0.580672	-0.162459	-0.215051	-0.353256	-0.259176	-0.488826	-0.651936	-0.426552	-0.0304118	0.0118613	0.744015	-0.785603	-0.242855	-0.839388	1.26048	-0.0568433	-0.100252	-0.537503	-0.552353	-0.614736	-0.436921	-0.167862	0.0351531	-0.216026	-0.0508379	-0.436663	0.000405232
-4.65889	1.8994	-0.600771	-0.0629456	-0.130422	-0.600028	0.756003	-0.0680225	-0.502378	0.452203	0.878041	0.37229	-0.0903149	0.576488	-0.478563	-0.113284	-0.2565	-0.128922	-0.269978	-0.494573	-0.107574	0.221872	0.0988228	-0.578671	-0.163999	-0.213676	-0.35279	-0.257152	-0.489518	-0.653411	-0.426954	-0.0294758	0.0124823	0.741689	-0.786547	-0.24184	-0.838566	1.25946	-0.0573654	-0.0989314	-0.537804	-0.553321	-0.614868	-0.437819	-0.168148	0.0338608	-0.215284	-0.046515	-0.43759	4.54143e-05
-4.6579	1.89657	-0.600685	-0.0621438	-0.131874	-0.599752	0.755191	-0.0691762	-0.501706	0.452718	0.879605	0.371256	-0.0903528	0.574369	-0.477628	-0.11104	-0.257593	-0.128972	-0.269017	-0.494787	-0.106472	0.221686	0.100767	-0.576661	-0.165545	-0.212305	-0.352307	-0.255122	-0.490197	-0.654868	-0.427365	-0.0285538	0.0130976	0.739358	-0.787496	-0.240825	-0.837723	1.25843	-0.0579003	-0.09762	-0.538096	-0.55429	-0.615003	-0.438713	-0.168428	0.0325562	-0.214544	-0.0421712	-0.438516	-0.000317227
-4.65692	1.8937	-0.600608	-0.0613531	-0.13332	-0.59947	0.754375	-0.0703595	-0.501027	0.453219	0.881141	0.370227	-0.0904106	0.572209	-0.476704	-0.108799	-0.258686	-0.129028	-0.268058	-0.494991	-0.10536	0.221498	0.1027	-0.574643	-0.167096	-0.210936	-0.351807	-0.253086	-0.490863	-0.656307	-0.427786	-0.027646	0.0137072	0.737021	-0.788449	-0.23981	-0.83686	1.25738	-0.0584476	-0.096318	-0.53838	-0.555258	-0.615142	-0.439604	-0.168703	0.0312395	-0.213808	-0.0378064	-0.439441	-0.000682633
-4.65594	1.89081	-0.600539	-0.0605737	-0.13476	-0.599182	0.753557	-0.0715723	-0.500343	0.453708	0.88265	0.369201	-0.0904885	0.57001	-0.47579	-0.106563	-0.259777	-0.129091	-0.267102	-0.495186	-0.104238	0.221309	0.104622	-0.572616	-0.168651	-0.20957	-0.351289	-0.251044	-0.491517	-0.657729	-0.428216	-0.0267523	0.014311	0.734679	-0.789406	-0.238796	-0.835978	1.25632	-0.0590074	-0.0950253	-0.538655	-0.556227	-0.615285	-0.44049	-0.168971	0.0299108	-0.213075	-0.0334208	-0.440365	-0.00105075
-4.65495	1.88789	-0.600478	-0.0598057	-0.136193	-0.598888	0.752737	-0.0728146	-0.499651	0.454184	0.884131	0.36818	-0.0905864	0.56777	-0.474887	-0.10433	-0.260867	-0.12916	-0.266149	-0.49537	-0.103107	0.221119	0.106531	-0.57058	-0.170211	-0.208208	-0.350754	-0.248997	-0.492157	-0.659132	-0.428656	-0.025873	0.014909	0.732332	-0.790367	-0.237783	-0.835075	1.25524	-0.0595794	-0.0937422	-0.538922	-0.557196	-0.615431	-0.441372	-0.169234	0.0285704	-0.212346	-0.0290143	-0.441288	-0.00142152
-4.65397	1.88495	-0.600426	-0.0590494	-0.13762	-0.598586	0.751915	-0.0740863	-0.498954	0.454647	0.885584	0.367162	-0.0907043	0.565491	-0.473994	-0.102101	-0.261956	-0.129236	-0.265198	-0.495545	-0.101967	0.220928	0.108428	-0.568536	-0.171776	-0.20685	-0.350201	-0.246945	-0.492784	-0.660518	-0.429106	-0.0250081	0.0155011	0.729981	-0.791332	-0.236769	-0.834153	1.25415	-0.0601635	-0.0924687	-0.539179	-0.558165	-0.61558	-0.442251	-0.16949	0.0272182	-0.211619	-0.024587	-0.44221	-0.00179488
-4.65299	1.88198	-0.600382	-0.0583049	-0.139041	-0.598279	0.75109	-0.0753874	-0.49825	0.455097	0.887009	0.366148	-0.0908421	0.563172	-0.473112	-0.0998771	-0.263043	-0.129319	-0.26425	-0.495709	-0.100816	0.220736	0.110314	-0.566483	-0.173346	-0.205495	-0.349631	-0.244888	-0.493398	-0.661886	-0.429565	-0.0241577	0.0160874	0.727624	-0.792301	-0.235756	-0.83321	1.25304	-0.0607597	-0.091205	-0.539428	-0.559134	-0.615733	-0.443125	-0.16974	0.0258547	-0.210896	-0.0201391	-0.44313	-0.0021708
-4.652	1.87899	-0.600347	-0.0575724	-0.140456	-0.597965	0.750263	-0.0767178	-0.497539	0.455534	0.888407	0.365137	-0.0909998	0.560815	-0.47224	-0.0976574	-0.264129	-0.129408	-0.263304	-0.495863	-0.099656	0.220542	0.112187	-0.564422	-0.17492	-0.204144	-0.349043	-0.242828	-0.493998	-0.663236	-0.430033	-0.0233219	0.0166676	0.725262	-0.793274	-0.234744	-0.832248	1.25192	-0.0613677	-0.0899511	-0.539668	-0.560104	-0.615889	-0.443995	-0.169985	0.0244798	-0.210177	-0.0156704	-0.444049	-0.0025492
-4.65102	1.87598	-0.600321	-0.056852	-0.141865	-0.597644	0.749434	-0.0780775	-0.496822	0.455958	0.889776	0.364129	-0.0911774	0.558418	-0.471379	-0.0954423	-0.265213	-0.129503	-0.262362	-0.496006	-0.0984862	0.220348	0.114048	-0.562353	-0.1765	-0.202798	-0.348438	-0.240763	-0.494585	-0.664568	-0.430512	-0.0225008	0.0172419	0.722896	-0.79425	-0.233733	-0.831266	1.25079	-0.0619875	-0.0887072	-0.539898	-0.561074	-0.616048	-0.44486	-0.170223	0.0230938	-0.209461	-0.0111812	-0.444967	-0.00293005
-4.65004	1.87294	-0.600303	-0.0561439	-0.143267	-0.597317	0.748603	-0.0794664	-0.496098	0.456369	0.891118	0.363125	-0.0913748	0.555982	-0.470528	-0.093232	-0.266296	-0.129605	-0.261422	-0.496139	-0.0973067	0.220152	0.115896	-0.560275	-0.178084	-0.201456	-0.347816	-0.238694	-0.495159	-0.665882	-0.431	-0.0216945	0.0178102	0.720525	-0.795231	-0.232722	-0.830265	1.24964	-0.0626189	-0.0874733	-0.54012	-0.562045	-0.61621	-0.445721	-0.170456	0.0216968	-0.208749	-0.00667154	-0.445883	-0.00331329
-4.64905	1.86987	-0.600293	-0.0554482	-0.144663	-0.596983	0.747771	-0.0808845	-0.495367	0.456766	0.892431	0.362124	-0.091592	0.553508	-0.469688	-0.0910268	-0.267376	-0.129714	-0.260486	-0.49626	-0.0961175	0.219955	0.117731	-0.55819	-0.179673	-0.200118	-0.347176	-0.236621	-0.495719	-0.667177	-0.431498	-0.020903	0.0183724	0.71815	-0.796216	-0.231712	-0.829244	1.24848	-0.0632618	-0.0862496	-0.540331	-0.563016	-0.616375	-0.446578	-0.170682	0.020289	-0.208041	-0.0021414	-0.446797	-0.00369887
-4.64807	1.86679	-0.600292	-0.0547652	-0.146052	-0.596642	0.746936	-0.0823316	-0.49463	0.457151	0.893717	0.361126	-0.0918289	0.550995	-0.468858	-0.0888268	-0.268455	-0.129829	-0.259552	-0.49637	-0.0949186	0.219758	0.119554	-0.556097	-0.181266	-0.198785	-0.346518	-0.234546	-0.496266	-0.668455	-0.432006	-0.0201265	0.0189284	0.71577	-0.797204	-0.230703	-0.828204	1.2473	-0.0639161	-0.0850362	-0.540534	-0.563988	-0.616542	-0.44743	-0.170902	0.0188706	-0.207336	0.0024091	-0.447709	-0.00408675
-4.64709	1.86368	-0.6003	-0.054095	-0.147436	-0.596295	0.7461	-0.0838077	-0.493885	0.457522	0.894974	0.36013	-0.0920855	0.548445	-0.468039	-0.0866322	-0.269531	-0.129951	-0.258622	-0.496469	-0.0937099	0.219559	0.121364	-0.553995	-0.182864	-0.197458	-0.345843	-0.232467	-0.496799	-0.669714	-0.432523	-0.019365	0.0194783	0.713386	-0.798196	-0.229694	-0.827145	1.24611	-0.0645815	-0.083833	-0.540726	-0.564961	-0.616713	-0.448277	-0.171116	0.0174417	-0.206636	0.00697987	-0.44862	-0.00447687
-4.64611	1.86054	-0.600317	-0.0534378	-0.148813	-0.595941	0.745263	-0.0853127	-0.493134	0.45788	0.896203	0.359138	-0.0923617	0.545857	-0.46723	-0.0844431	-0.270606	-0.13008	-0.257694	-0.496557	-0.0924916	0.219359	0.123161	-0.551887	-0.184468	-0.196135	-0.345151	-0.230386	-0.497319	-0.670955	-0.433051	-0.0186187	0.020022	0.710998	-0.799192	-0.228687	-0.826066	1.24491	-0.0652581	-0.0826404	-0.540909	-0.565935	-0.616886	-0.44912	-0.171324	0.0160026	-0.205939	0.0115708	-0.449529	-0.0048692
-4.64512	1.85739	-0.600342	-0.0527936	-0.150184	-0.59558	0.744424	-0.0868466	-0.492376	0.458225	0.897403	0.358148	-0.0926575	0.543231	-0.466431	-0.0822597	-0.271678	-0.130216	-0.25677	-0.496632	-0.0912635	0.219158	0.124945	-0.54977	-0.186075	-0.194818	-0.344441	-0.228302	-0.497824	-0.672177	-0.433588	-0.0178876	0.0205594	0.708606	-0.800192	-0.22768	-0.824968	1.24369	-0.0659457	-0.0814582	-0.541082	-0.56691	-0.617061	-0.449957	-0.171526	0.0145533	-0.205247	0.0161819	-0.450435	-0.00526368
-4.64414	1.85422	-0.600376	-0.0521628	-0.151548	-0.595213	0.743584	-0.0884092	-0.491611	0.458557	0.898575	0.35716	-0.0929728	0.540568	-0.465642	-0.0800822	-0.272749	-0.130358	-0.25585	-0.496696	-0.0900258	0.218956	0.126716	-0.547646	-0.187688	-0.193506	-0.343713	-0.226216	-0.498316	-0.673381	-0.434135	-0.0171717	0.0210905	0.70621	-0.801196	-0.226675	-0.823852	1.24246	-0.066644	-0.0802866	-0.541245	-0.567885	-0.617239	-0.45079	-0.171722	0.0130941	-0.204559	0.020813	-0.45134	-0.00566028
-4.64316	1.85102	-0.600419	-0.0515453	-0.152906	-0.594839	0.742742	-0.0900005	-0.490838	0.458875	0.899719	0.356175	-0.0933075	0.537868	-0.464864	-0.0779108	-0.273816	-0.130507	-0.254932	-0.496748	-0.0887783	0.218753	0.128473	-0.545515	-0.189305	-0.1922	-0.342968	-0.224129	-0.498794	-0.674567	-0.434692	-0.0164713	0.0216153	0.70381	-0.802203	-0.22567	-0.822716	1.24122	-0.0673531	-0.0791256	-0.541398	-0.568861	-0.617419	-0.451618	-0.171912	0.0116252	-0.203875	0.025464	-0.452242	-0.00605895
-4.64217	1.8478	-0.60047	-0.0509415	-0.154258	-0.594458	0.7419	-0.0916203	-0.490059	0.459181	0.900834	0.355192	-0.0936616	0.535132	-0.464097	-0.0757456	-0.274882	-0.130663	-0.254018	-0.496787	-0.0875211	0.218549	0.130217	-0.543376	-0.190926	-0.1909	-0.342206	-0.22204	-0.499258	-0.675734	-0.435259	-0.0157863	0.0221337	0.701406	-0.803213	-0.224667	-0.821561	1.23996	-0.0680727	-0.0779755	-0.54154	-0.569839	-0.617602	-0.45244	-0.172096	0.0101466	-0.203196	0.0301349	-0.453142	-0.00645965
-4.64119	1.84456	-0.60053	-0.0503514	-0.155604	-0.594071	0.741056	-0.0932687	-0.489272	0.459472	0.901921	0.354211	-0.094035	0.532359	-0.463339	-0.0735868	-0.275945	-0.130826	-0.253108	-0.496814	-0.0862543	0.218344	0.131947	-0.54123	-0.192553	-0.189607	-0.341426	-0.21995	-0.499707	-0.676883	-0.435837	-0.0151169	0.0226457	0.698999	-0.804228	-0.223665	-0.820388	1.23869	-0.0688028	-0.0768361	-0.541672	-0.570818	-0.617786	-0.453258	-0.172274	0.00865869	-0.202521	0.0348254	-0.45404	-0.00686233
-4.64021	1.84131	-0.600599	-0.0497753	-0.156943	-0.593676	0.740212	-0.0949454	-0.488479	0.459751	0.902979	0.353232	-0.0944277	0.52955	-0.462592	-0.0714345	-0.277005	-0.130996	-0.252201	-0.496829	-0.0849777	0.218138	0.133664	-0.539077	-0.194184	-0.188319	-0.340628	-0.217859	-0.500143	-0.678013	-0.436424	-0.0144631	0.0231513	0.696588	-0.805245	-0.222664	-0.819196	1.2374	-0.0695431	-0.0757076	-0.541794	-0.571798	-0.617972	-0.45407	-0.172445	0.0071615	-0.201851	0.0395356	-0.454935	-0.00726697
-4.63922	1.83803	-0.600677	-0.0492131	-0.158276	-0.593275	0.739366	-0.0966505	-0.487678	0.460016	0.904009	0.352255	-0.0948394	0.526705	-0.461855	-0.0692889	-0.278063	-0.131172	-0.251298	-0.496831	-0.0836914	0.217931	0.135367	-0.536917	-0.195819	-0.187038	-0.339813	-0.215767	-0.500564	-0.679124	-0.437021	-0.0138251	0.0236503	0.694173	-0.806267	-0.221665	-0.817986	1.2361	-0.0702936	-0.0745901	-0.541905	-0.572779	-0.618161	-0.454877	-0.172611	0.00565524	-0.201185	0.0442654	-0.455828	-0.00767352
-4.63824	1.83474	-0.600764	-0.0486652	-0.159603	-0.592867	0.73852	-0.0983837	-0.48687	0.460268	0.90501	0.351279	-0.0952703	0.523825	-0.461128	-0.0671502	-0.279118	-0.131356	-0.250398	-0.49682	-0.0823955	0.217723	0.137056	-0.53475	-0.197459	-0.185764	-0.338981	-0.213675	-0.500971	-0.680217	-0.437628	-0.0132028	0.0241428	0.691756	-0.807291	-0.220666	-0.816757	1.23479	-0.0710542	-0.0734836	-0.542006	-0.573761	-0.618351	-0.455678	-0.17277	0.00414011	-0.200524	0.0490145	-0.456718	-0.00808195
-4.63726	1.83142	-0.600859	-0.0481317	-0.160923	-0.592453	0.737673	-0.100145	-0.486054	0.460506	0.905982	0.350305	-0.0957201	0.52091	-0.460411	-0.0650186	-0.28017	-0.131546	-0.249502	-0.496796	-0.0810899	0.217514	0.138731	-0.532576	-0.199103	-0.184496	-0.338131	-0.211583	-0.501364	-0.681291	-0.438245	-0.0125964	0.0246287	0.689334	-0.80832	-0.21967	-0.81551	1.23346	-0.0718247	-0.0723882	-0.542095	-0.574745	-0.618542	-0.456474	-0.172923	0.00261626	-0.199868	0.0537829	-0.457606	-0.00849222
-4.63628	1.82809	-0.600963	-0.0476126	-0.162238	-0.592031	0.736826	-0.101934	-0.485231	0.460731	0.906926	0.349333	-0.0961888	0.517959	-0.459704	-0.0628941	-0.281219	-0.131744	-0.24861	-0.496759	-0.0797747	0.217305	0.140391	-0.530396	-0.200752	-0.183236	-0.337264	-0.209491	-0.501743	-0.682347	-0.438872	-0.0120059	0.025108	0.68691	-0.809351	-0.218674	-0.814245	1.23212	-0.0726049	-0.0713039	-0.542174	-0.575731	-0.618735	-0.457264	-0.17307	0.0010839	-0.199217	0.0585706	-0.45849	-0.00890429
-4.63529	1.82474	-0.601076	-0.0471083	-0.163546	-0.591602	0.735978	-0.103751	-0.484401	0.460942	0.907841	0.348362	-0.0966763	0.514974	-0.459007	-0.0607769	-0.282265	-0.131948	-0.247721	-0.496708	-0.0784498	0.217095	0.142038	-0.528209	-0.202406	-0.181983	-0.336379	-0.2074	-0.502107	-0.683383	-0.439509	-0.0114315	0.0255806	0.684483	-0.810386	-0.217681	-0.812961	1.23076	-0.0733947	-0.0702308	-0.542242	-0.576717	-0.61893	-0.458049	-0.173211	-0.00045682	-0.198571	0.0633773	-0.459372	-0.00931813
-4.63431	1.82137	-0.601198	-0.0466187	-0.164847	-0.591167	0.735129	-0.105596	-0.483564	0.46114	0.908727	0.347392	-0.0971826	0.511955	-0.45832	-0.0586672	-0.283307	-0.13216	-0.246837	-0.496644	-0.0771153	0.216883	0.14367	-0.526015	-0.204064	-0.180737	-0.335477	-0.20531	-0.502456	-0.684402	-0.440156	-0.0108732	0.0260466	0.682052	-0.811424	-0.216689	-0.81166	1.22939	-0.0741941	-0.0691689	-0.542298	-0.577706	-0.619126	-0.458827	-0.173346	-0.0020057	-0.197929	0.068203	-0.460251	-0.00973371
-4.63333	1.81799	-0.601329	-0.0461441	-0.166143	-0.590725	0.734281	-0.107469	-0.482719	0.461325	0.909585	0.346423	-0.0977074	0.508902	-0.457643	-0.0565652	-0.284347	-0.132378	-0.245956	-0.496567	-0.0757712	0.216671	0.145288	-0.523815	-0.205726	-0.179499	-0.334558	-0.20322	-0.502791	-0.685401	-0.440814	-0.0103311	0.0265058	0.679619	-0.812465	-0.215698	-0.810341	1.22801	-0.0750028	-0.0681184	-0.542344	-0.578696	-0.619323	-0.4596	-0.173475	-0.00356257	-0.197293	0.0730474	-0.461127	-0.010151
-4.63234	1.81459	-0.601469	-0.0456845	-0.167432	-0.590276	0.733432	-0.109369	-0.481866	0.461496	0.910414	0.345455	-0.0982508	0.505815	-0.456976	-0.0544709	-0.285383	-0.132604	-0.24508	-0.496475	-0.0744174	0.216459	0.146891	-0.521609	-0.207392	-0.178268	-0.333621	-0.201133	-0.503111	-0.686382	-0.441481	-0.00980524	0.0269582	0.677183	-0.81351	-0.214709	-0.809004	1.22662	-0.0758207	-0.0670791	-0.542377	-0.579687	-0.619522	-0.460367	-0.173598	-0.00512725	-0.196663	0.0779106	-0.462001	-0.01057
-4.63136	1.81117	-0.601617	-0.0452402	-0.168715	-0.58982	0.732582	-0.111297	-0.481006	0.461653	0.911214	0.344488	-0.0988125	0.502696	-0.456319	-0.0523846	-0.286416	-0.132837	-0.244207	-0.49637	-0.0730541	0.216245	0.148479	-0.519397	-0.209063	-0.177045	-0.332667	-0.199047	-0.503417	-0.687344	-0.442158	-0.00929571	0.0274038	0.674745	-0.814557	-0.213723	-0.80765	1.22521	-0.0766478	-0.0660513	-0.5424	-0.580681	-0.619721	-0.461129	-0.173715	-0.00669955	-0.196037	0.0827924	-0.46287	-0.0109906
-4.63038	1.80774	-0.601775	-0.0448113	-0.169992	-0.589358	0.731733	-0.113251	-0.480139	0.461797	0.911985	0.343521	-0.0993926	0.499543	-0.455672	-0.0503063	-0.287446	-0.133077	-0.243339	-0.496251	-0.0716813	0.216031	0.150053	-0.517178	-0.210738	-0.175831	-0.331696	-0.196963	-0.503708	-0.688287	-0.442846	-0.00880259	0.0278426	0.672303	-0.815608	-0.212737	-0.806278	1.22378	-0.0774838	-0.0650348	-0.542411	-0.581676	-0.619922	-0.461884	-0.173825	-0.0082793	-0.195417	0.0876926	-0.463737	-0.0114128
-4.62939	1.80429	-0.601941	-0.0443979	-0.171263	-0.588888	0.730884	-0.115233	-0.479264	0.461928	0.912728	0.342555	-0.0999908	0.496357	-0.455034	-0.0482362	-0.288472	-0.133324	-0.242475	-0.496117	-0.0702989	0.215816	0.151611	-0.514954	-0.212417	-0.174625	-0.330707	-0.194882	-0.503984	-0.689211	-0.443544	-0.00832594	0.0282745	0.669859	-0.816662	-0.211754	-0.804889	1.22235	-0.0783286	-0.0640298	-0.54241	-0.582673	-0.620123	-0.462633	-0.17393	-0.00986631	-0.194802	0.0926111	-0.464601	-0.0118366
-4.62841	1.80083	-0.602116	-0.0440002	-0.172527	-0.588412	0.730034	-0.117242	-0.478382	0.462045	0.913442	0.34159	-0.100607	0.493139	-0.454406	-0.0461745	-0.289494	-0.133578	-0.241615	-0.49597	-0.068907	0.215601	0.153155	-0.512724	-0.214101	-0.173427	-0.329702	-0.192803	-0.504245	-0.690117	-0.444251	-0.00786584	0.0286994	0.667413	-0.817719	-0.210773	-0.803483	1.2209	-0.0791821	-0.0630363	-0.542397	-0.583672	-0.620325	-0.463376	-0.174028	-0.0114604	-0.194193	0.0975477	-0.465461	-0.012262
-4.62743	1.79735	-0.6023	-0.0436182	-0.173785	-0.587928	0.729185	-0.119278	-0.477492	0.462148	0.914127	0.340625	-0.101241	0.48989	-0.453788	-0.0441213	-0.290512	-0.13384	-0.240759	-0.495807	-0.0675056	0.215385	0.154683	-0.510488	-0.215788	-0.172238	-0.328679	-0.190727	-0.504491	-0.691004	-0.444969	-0.00742237	0.0291174	0.664964	-0.818778	-0.209794	-0.802059	1.21943	-0.0800442	-0.0620543	-0.542372	-0.584672	-0.620527	-0.464112	-0.174121	-0.0130614	-0.19359	0.102502	-0.466318	-0.0126889
-4.62644	1.79386	-0.602493	-0.0432522	-0.175037	-0.587438	0.728336	-0.12134	-0.476595	0.462238	0.914783	0.33966	-0.101894	0.486608	-0.453179	-0.0420766	-0.291527	-0.134109	-0.239908	-0.49563	-0.0660948	0.215169	0.156197	-0.508246	-0.21748	-0.171057	-0.327639	-0.188655	-0.504722	-0.691872	-0.445697	-0.00699558	0.0295284	0.662514	-0.819841	-0.208816	-0.800619	1.21796	-0.0809147	-0.0610839	-0.542335	-0.585675	-0.62073	-0.464842	-0.174207	-0.0146691	-0.192992	0.107475	-0.467171	-0.0131173
-4.62546	1.79036	-0.602695	-0.0429022	-0.176283	-0.586941	0.727488	-0.123429	-0.47569	0.462315	0.915411	0.338695	-0.102564	0.483296	-0.45258	-0.0400408	-0.292538	-0.134385	-0.239061	-0.495439	-0.0646745	0.214952	0.157695	-0.505999	-0.219176	-0.169886	-0.326582	-0.186586	-0.504939	-0.692721	-0.446435	-0.00658556	0.0299324	0.660061	-0.820906	-0.207841	-0.799162	1.21647	-0.0817936	-0.060125	-0.542286	-0.58668	-0.620934	-0.465566	-0.174288	-0.0162833	-0.1924	0.112465	-0.468021	-0.0135473
-4.62448	1.78684	-0.602905	-0.0425684	-0.177523	-0.586438	0.726639	-0.125545	-0.474777	0.462378	0.91601	0.33773	-0.103251	0.479953	-0.45199	-0.0380138	-0.293544	-0.134668	-0.238218	-0.495232	-0.0632448	0.214734	0.159177	-0.503747	-0.220876	-0.168723	-0.325508	-0.184521	-0.50514	-0.693552	-0.447183	-0.00619236	0.0303293	0.657605	-0.821974	-0.206868	-0.797688	1.21496	-0.0826806	-0.0591777	-0.542225	-0.587687	-0.621137	-0.466283	-0.174362	-0.0179039	-0.191814	0.117473	-0.468867	-0.0139787
-4.6235	1.78331	-0.603125	-0.0422509	-0.178757	-0.585927	0.725791	-0.127687	-0.473857	0.462427	0.91658	0.336764	-0.103956	0.476579	-0.45141	-0.0359958	-0.294547	-0.134959	-0.23738	-0.495011	-0.0618057	0.214517	0.160645	-0.501489	-0.222579	-0.16757	-0.324416	-0.18246	-0.505326	-0.694364	-0.447941	-0.00581605	0.0307192	0.655148	-0.823045	-0.205898	-0.796198	1.21345	-0.0835756	-0.058242	-0.542151	-0.588696	-0.621341	-0.466994	-0.174431	-0.0195307	-0.191233	0.122498	-0.469709	-0.0144115
-4.62251	1.77977	-0.603353	-0.0419499	-0.179985	-0.58541	0.724944	-0.129855	-0.47293	0.462463	0.917122	0.335799	-0.104678	0.473175	-0.450839	-0.033987	-0.295545	-0.135257	-0.236546	-0.494774	-0.0603572	0.214299	0.162096	-0.499226	-0.224287	-0.166426	-0.323308	-0.180403	-0.505497	-0.695157	-0.448709	-0.00545671	0.0311019	0.652689	-0.824119	-0.204929	-0.794692	1.21192	-0.0844785	-0.057318	-0.542065	-0.589707	-0.621545	-0.467698	-0.174493	-0.0211634	-0.190659	0.127541	-0.470548	-0.0148458
-4.62153	1.77622	-0.60359	-0.0416655	-0.181206	-0.584886	0.724097	-0.132049	-0.471995	0.462485	0.917635	0.334833	-0.105418	0.469741	-0.450277	-0.0319875	-0.296539	-0.135562	-0.235717	-0.494522	-0.0588994	0.21408	0.163532	-0.496957	-0.225999	-0.165292	-0.322183	-0.178352	-0.505652	-0.695931	-0.449487	-0.00511438	0.0314774	0.650229	-0.825195	-0.203963	-0.793169	1.21037	-0.0853892	-0.0564055	-0.541966	-0.59072	-0.621749	-0.468396	-0.17455	-0.022802	-0.190091	0.1326	-0.471383	-0.0152814
-4.62055	1.77265	-0.603836	-0.0413977	-0.182422	-0.584355	0.723251	-0.134269	-0.471052	0.462494	0.918119	0.333866	-0.106174	0.466278	-0.449725	-0.0299973	-0.297529	-0.135875	-0.234893	-0.494255	-0.0574323	0.213861	0.164952	-0.494684	-0.227714	-0.164167	-0.321041	-0.176305	-0.505793	-0.696687	-0.450275	-0.00478915	0.0318458	0.647766	-0.826273	-0.203	-0.79163	1.20882	-0.0863075	-0.0555047	-0.541854	-0.591735	-0.621953	-0.469086	-0.1746	-0.0244461	-0.189529	0.137677	-0.472214	-0.0157185
-4.61956	1.76908	-0.60409	-0.0411467	-0.183631	-0.583817	0.722405	-0.136514	-0.470102	0.46249	0.918575	0.332899	-0.106948	0.462786	-0.449181	-0.0280166	-0.298514	-0.136195	-0.234073	-0.493972	-0.055956	0.213643	0.166356	-0.492406	-0.229433	-0.163053	-0.319883	-0.174264	-0.505918	-0.697424	-0.451073	-0.00448107	0.0322069	0.645302	-0.827354	-0.202038	-0.790076	1.20725	-0.0872333	-0.0546156	-0.54173	-0.592753	-0.622156	-0.46977	-0.174645	-0.0260957	-0.188973	0.14277	-0.473042	-0.016157
-4.61858	1.76549	-0.604354	-0.0409127	-0.184835	-0.583272	0.72156	-0.138786	-0.469145	0.462471	0.919002	0.331931	-0.107738	0.459265	-0.448647	-0.0260456	-0.299495	-0.136523	-0.233258	-0.493673	-0.0544704	0.213423	0.167744	-0.490123	-0.231156	-0.161948	-0.318707	-0.172229	-0.506027	-0.698143	-0.451882	-0.0041902	0.0325608	0.642837	-0.828438	-0.20108	-0.788505	1.20566	-0.0881665	-0.0537381	-0.541592	-0.593773	-0.62236	-0.470447	-0.174683	-0.0277506	-0.188423	0.14788	-0.473865	-0.0165968
-4.6176	1.76189	-0.604626	-0.0406958	-0.186032	-0.582721	0.720717	-0.141082	-0.46818	0.46244	0.919401	0.330962	-0.108545	0.455716	-0.448122	-0.0240842	-0.300471	-0.136858	-0.232448	-0.493359	-0.0529756	0.213204	0.169117	-0.487836	-0.232883	-0.160853	-0.317515	-0.170199	-0.506121	-0.698842	-0.4527	-0.00391661	0.0329074	0.64037	-0.829524	-0.200124	-0.786919	1.20407	-0.0891069	-0.0528722	-0.541442	-0.594795	-0.622562	-0.471117	-0.174716	-0.0294105	-0.18788	0.153006	-0.474684	-0.0170379
-4.61661	1.75829	-0.604907	-0.040496	-0.187224	-0.582163	0.719874	-0.143404	-0.467207	0.462395	0.919771	0.329992	-0.109369	0.45214	-0.447605	-0.0221328	-0.301442	-0.1372	-0.231642	-0.493029	-0.0514717	0.212985	0.170473	-0.485544	-0.234613	-0.159769	-0.316306	-0.168176	-0.5062	-0.699523	-0.453528	-0.00366035	0.0332467	0.637901	-0.830612	-0.19917	-0.785318	1.20246	-0.0900544	-0.052018	-0.541278	-0.59582	-0.622764	-0.47178	-0.174743	-0.0310753	-0.187343	0.158149	-0.4755	-0.0174804
-4.61563	1.75467	-0.605197	-0.0403135	-0.188409	-0.581598	0.719032	-0.145751	-0.466227	0.462336	0.920112	0.32902	-0.110208	0.448535	-0.447098	-0.0201913	-0.302409	-0.137551	-0.230842	-0.492683	-0.0499587	0.212766	0.171812	-0.483247	-0.236347	-0.158695	-0.31508	-0.166159	-0.506263	-0.700186	-0.454366	-0.00342148	0.0335787	0.635431	-0.831702	-0.19822	-0.783701	1.20083	-0.0910089	-0.0511754	-0.541101	-0.596847	-0.622966	-0.472436	-0.174764	-0.0327448	-0.186812	0.163307	-0.476311	-0.0179241
-4.61465	1.75105	-0.605495	-0.0401485	-0.189589	-0.581027	0.718191	-0.148122	-0.46524	0.462264	0.920426	0.328048	-0.111065	0.444904	-0.446599	-0.0182599	-0.303371	-0.137908	-0.230046	-0.492321	-0.0484365	0.212547	0.173136	-0.480946	-0.238084	-0.157632	-0.313838	-0.164149	-0.506311	-0.70083	-0.455214	-0.00320007	0.0339033	0.63296	-0.832795	-0.197272	-0.782069	1.1992	-0.0919702	-0.0503444	-0.540911	-0.597877	-0.623166	-0.473085	-0.174779	-0.0344188	-0.186288	0.168482	-0.477118	-0.0183692
-4.61367	1.74741	-0.605803	-0.0400009	-0.190763	-0.580449	0.717351	-0.150519	-0.464245	0.462178	0.920711	0.327074	-0.111937	0.441246	-0.446109	-0.0163386	-0.304327	-0.138273	-0.229255	-0.491943	-0.0469053	0.212328	0.174443	-0.478641	-0.239825	-0.15658	-0.312579	-0.162146	-0.506343	-0.701455	-0.456071	-0.00299616	0.0342205	0.630488	-0.833889	-0.196327	-0.780423	1.19755	-0.0929383	-0.0495251	-0.540708	-0.598909	-0.623366	-0.473727	-0.174789	-0.0360971	-0.185771	0.173672	-0.477921	-0.0188156
-4.61268	1.74377	-0.606119	-0.039871	-0.191931	-0.579864	0.716512	-0.152939	-0.463243	0.462079	0.920967	0.326098	-0.112825	0.437562	-0.445627	-0.0144276	-0.305279	-0.138646	-0.22847	-0.491548	-0.0453652	0.212109	0.175733	-0.476332	-0.241569	-0.155538	-0.311304	-0.160151	-0.50636	-0.702062	-0.456939	-0.00280982	0.0345303	0.628015	-0.834986	-0.195384	-0.778761	1.19589	-0.0939129	-0.0487173	-0.54049	-0.599943	-0.623565	-0.474361	-0.174793	-0.0377796	-0.18526	0.178877	-0.478719	-0.0192632
-4.6117	1.74012	-0.606443	-0.0397588	-0.193093	-0.579273	0.715675	-0.155385	-0.462234	0.461967	0.921196	0.325121	-0.113728	0.433852	-0.445154	-0.012527	-0.306226	-0.139027	-0.227689	-0.491137	-0.043816	0.21189	0.177007	-0.474019	-0.243316	-0.154507	-0.310013	-0.158163	-0.50636	-0.702651	-0.457816	-0.0026411	0.0348327	0.625541	-0.836084	-0.194445	-0.777085	1.19421	-0.094894	-0.0479211	-0.540259	-0.60098	-0.623763	-0.474988	-0.17479	-0.039466	-0.184756	0.184098	-0.479514	-0.0197121
-4.61072	1.73647	-0.606776	-0.0396644	-0.194249	-0.578675	0.714838	-0.157854	-0.461217	0.461841	0.921396	0.324141	-0.114648	0.430116	-0.44469	-0.0106369	-0.307167	-0.139415	-0.226913	-0.49071	-0.0422579	0.211672	0.178265	-0.471702	-0.245067	-0.153488	-0.308705	-0.156184	-0.506345	-0.703221	-0.458704	-0.00249005	0.0351276	0.623066	-0.837185	-0.193509	-0.775394	1.19253	-0.0958814	-0.0471365	-0.540014	-0.60202	-0.623959	-0.475607	-0.174783	-0.0411562	-0.184259	0.189334	-0.480303	-0.0201623
-4.60973	1.73281	-0.607118	-0.039588	-0.1954	-0.578071	0.714003	-0.160348	-0.460193	0.461702	0.921568	0.32316	-0.115582	0.426356	-0.444234	-0.00875738	-0.308103	-0.13981	-0.226143	-0.490266	-0.040691	0.211453	0.179505	-0.469381	-0.246821	-0.15248	-0.307381	-0.154213	-0.506315	-0.703772	-0.459601	-0.00235673	0.035415	0.620591	-0.838287	-0.192576	-0.773689	1.19082	-0.096875	-0.0463634	-0.539756	-0.603062	-0.624154	-0.47622	-0.174769	-0.04285	-0.183769	0.194585	-0.481089	-0.0206137
-4.60875	1.72914	-0.607468	-0.0395296	-0.196545	-0.57746	0.71317	-0.162865	-0.459161	0.461549	0.921712	0.322177	-0.116532	0.422571	-0.443786	-0.00688852	-0.309033	-0.140214	-0.225378	-0.489806	-0.0391152	0.211236	0.180729	-0.467056	-0.248578	-0.151483	-0.306041	-0.15225	-0.506268	-0.704306	-0.460507	-0.00224119	0.0356949	0.618114	-0.839391	-0.191645	-0.77197	1.18911	-0.0978747	-0.0456017	-0.539483	-0.604107	-0.624348	-0.476824	-0.17475	-0.0445472	-0.183286	0.199851	-0.48187	-0.0210664
-4.60777	1.72546	-0.607827	-0.0394894	-0.197684	-0.576842	0.712338	-0.165406	-0.458123	0.461383	0.921828	0.321192	-0.117497	0.418761	-0.443346	-0.00503041	-0.309958	-0.140625	-0.224617	-0.489329	-0.0375306	0.211019	0.181936	-0.464728	-0.250338	-0.150498	-0.304685	-0.150296	-0.506206	-0.704821	-0.461424	-0.00214347	0.0359673	0.615637	-0.840497	-0.190718	-0.770237	1.18739	-0.0988803	-0.0448516	-0.539196	-0.605154	-0.62454	-0.477421	-0.174725	-0.0462477	-0.18281	0.205131	-0.482646	-0.0215203
-4.60678	1.72178	-0.608194	-0.0394674	-0.198817	-0.576218	0.711507	-0.16797	-0.457077	0.461203	0.921916	0.320205	-0.118477	0.414928	-0.442914	-0.00318316	-0.310878	-0.141043	-0.223862	-0.488835	-0.0359373	0.210802	0.183126	-0.462396	-0.252101	-0.149524	-0.303312	-0.148352	-0.506128	-0.705318	-0.46235	-0.00206364	0.0362321	0.613159	-0.841604	-0.189795	-0.76849	1.18565	-0.0998917	-0.0441128	-0.538895	-0.606204	-0.62473	-0.478011	-0.174695	-0.0479512	-0.18234	0.210425	-0.483418	-0.0219755
-4.6058	1.7181	-0.60857	-0.0394637	-0.199944	-0.575587	0.710678	-0.170558	-0.456024	0.461011	0.921976	0.319215	-0.119472	0.411071	-0.442491	-0.00134684	-0.311792	-0.14147	-0.223113	-0.488324	-0.0343353	0.210586	0.184298	-0.460061	-0.253868	-0.148563	-0.301924	-0.146417	-0.506034	-0.705796	-0.463286	-0.00200173	0.0364894	0.610681	-0.842713	-0.188874	-0.76673	1.18389	-0.100909	-0.0433855	-0.53858	-0.607257	-0.624919	-0.478593	-0.174659	-0.0496576	-0.181878	0.215733	-0.484186	-0.0224318
-4.60482	1.71441	-0.608954	-0.0394785	-0.201066	-0.574951	0.709851	-0.173168	-0.454964	0.460805	0.922009	0.318222	-0.120481	0.407192	-0.442075	0.000478454	-0.3127	-0.141904	-0.222369	-0.487796	-0.0327246	0.210371	0.185454	-0.457722	-0.255637	-0.147613	-0.30052	-0.144491	-0.505924	-0.706257	-0.464231	-0.0019578	0.0367391	0.608202	-0.843823	-0.187957	-0.764956	1.18213	-0.101931	-0.0426695	-0.53825	-0.608312	-0.625106	-0.479167	-0.174617	-0.0513666	-0.181424	0.221056	-0.484949	-0.0228894
-4.60383	1.71071	-0.609347	-0.0395118	-0.202183	-0.574307	0.709025	-0.175802	-0.453897	0.460585	0.922013	0.317227	-0.121505	0.40329	-0.441667	0.00229264	-0.313602	-0.142346	-0.22163	-0.487251	-0.0311053	0.210156	0.186593	-0.455381	-0.257408	-0.146675	-0.2991	-0.142576	-0.505799	-0.706699	-0.465186	-0.00193188	0.0369811	0.605723	-0.844935	-0.187044	-0.763169	1.18035	-0.10296	-0.0419648	-0.537906	-0.60937	-0.62529	-0.479733	-0.17457	-0.0530782	-0.180976	0.226392	-0.485707	-0.0233482
-4.60285	1.70701	-0.609748	-0.0395638	-0.203294	-0.573658	0.708201	-0.178458	-0.452823	0.460353	0.92199	0.316229	-0.122542	0.399366	-0.441267	0.00409565	-0.314498	-0.142796	-0.220896	-0.486689	-0.0294775	0.209942	0.187714	-0.453036	-0.259183	-0.145749	-0.297664	-0.140671	-0.505657	-0.707124	-0.46615	-0.00192404	0.0372156	0.603244	-0.846048	-0.186133	-0.761369	1.17856	-0.103993	-0.0412714	-0.537548	-0.610431	-0.625473	-0.480292	-0.174517	-0.0547921	-0.180536	0.231741	-0.48646	-0.0238083
-4.60187	1.70331	-0.610157	-0.0396344	-0.204399	-0.573002	0.707379	-0.181136	-0.451743	0.460107	0.92194	0.315229	-0.123594	0.39542	-0.440875	0.0058874	-0.315389	-0.143253	-0.220168	-0.486109	-0.0278412	0.209729	0.188818	-0.450689	-0.26096	-0.144836	-0.296213	-0.138777	-0.505499	-0.70753	-0.467124	-0.00193431	0.0374424	0.600764	-0.847163	-0.185227	-0.759556	1.17676	-0.105031	-0.0405892	-0.537174	-0.611494	-0.625654	-0.480842	-0.174459	-0.0565081	-0.180103	0.237103	-0.487209	-0.0242695
-4.60089	1.69961	-0.610575	-0.0397238	-0.205498	-0.572339	0.706559	-0.183837	-0.450655	0.459848	0.921862	0.314225	-0.12466	0.391453	-0.44049	0.00766781	-0.316273	-0.143719	-0.219445	-0.485513	-0.0261964	0.209517	0.189904	-0.448339	-0.26274	-0.143935	-0.294746	-0.136894	-0.505325	-0.707919	-0.468107	-0.00196273	0.0376616	0.598285	-0.848278	-0.184323	-0.75773	1.17495	-0.106075	-0.0399181	-0.536786	-0.61256	-0.625832	-0.481385	-0.174396	-0.0582261	-0.179677	0.242479	-0.487953	-0.024732
-4.5999	1.6959	-0.611001	-0.0398321	-0.206593	-0.571671	0.70574	-0.18656	-0.44956	0.459575	0.921757	0.313218	-0.125739	0.387466	-0.440112	0.00943681	-0.317151	-0.144192	-0.218728	-0.484899	-0.0245432	0.209306	0.190974	-0.445985	-0.264522	-0.143047	-0.293263	-0.135021	-0.505135	-0.708289	-0.4691	-0.00200934	0.0378731	0.595805	-0.849395	-0.183424	-0.755892	1.17312	-0.107123	-0.0392582	-0.536383	-0.613629	-0.626008	-0.481919	-0.174327	-0.0599459	-0.179259	0.247867	-0.488692	-0.0251957
-4.59892	1.69219	-0.611435	-0.0399594	-0.207681	-0.570996	0.704924	-0.189305	-0.448459	0.45929	0.921624	0.312208	-0.126832	0.383458	-0.439742	0.0111943	-0.318023	-0.144673	-0.218016	-0.484268	-0.0228817	0.209097	0.192025	-0.44363	-0.266306	-0.142171	-0.291766	-0.133161	-0.50493	-0.708642	-0.470102	-0.0020742	0.0380769	0.593325	-0.850512	-0.182528	-0.754041	1.17128	-0.108177	-0.0386093	-0.535965	-0.6147	-0.626181	-0.482446	-0.174252	-0.0616672	-0.178849	0.253268	-0.489427	-0.0256606
-4.59794	1.68848	-0.611877	-0.0401057	-0.208765	-0.570316	0.704109	-0.192071	-0.447351	0.458992	0.921465	0.311195	-0.127937	0.37943	-0.439379	0.0129403	-0.318889	-0.145162	-0.21731	-0.483619	-0.0212119	0.208888	0.193059	-0.441272	-0.268093	-0.141308	-0.290253	-0.131312	-0.504708	-0.708978	-0.471113	-0.00215733	0.038273	0.590845	-0.851631	-0.181636	-0.752178	1.16943	-0.109235	-0.0379713	-0.535532	-0.615775	-0.626351	-0.482965	-0.174173	-0.06339	-0.178446	0.25868	-0.490156	-0.0261267
-4.59695	1.68477	-0.612327	-0.0402711	-0.209842	-0.569629	0.703296	-0.194859	-0.446237	0.45868	0.921278	0.310178	-0.129056	0.375382	-0.439023	0.0146747	-0.319748	-0.145659	-0.21661	-0.482953	-0.0195339	0.208681	0.194076	-0.438911	-0.269883	-0.140457	-0.288724	-0.129475	-0.50447	-0.709295	-0.472133	-0.00225877	0.0384615	0.588366	-0.85275	-0.180748	-0.750304	1.16756	-0.110297	-0.0373443	-0.535084	-0.616852	-0.626519	-0.483475	-0.174088	-0.0651141	-0.178051	0.264105	-0.490881	-0.0265941
-4.59597	1.68105	-0.612785	-0.0404556	-0.210915	-0.568936	0.702486	-0.197668	-0.445116	0.458355	0.921064	0.309158	-0.130188	0.371316	-0.438675	0.0163974	-0.320601	-0.146164	-0.215915	-0.482269	-0.0178477	0.208475	0.195074	-0.436548	-0.271674	-0.13962	-0.287181	-0.12765	-0.504215	-0.709595	-0.473163	-0.00237857	0.0386422	0.585887	-0.85387	-0.179863	-0.748417	1.16569	-0.111364	-0.0367281	-0.534621	-0.617931	-0.626684	-0.483977	-0.173998	-0.0668392	-0.177664	0.269542	-0.4916	-0.0270627
-4.59499	1.67734	-0.613252	-0.0406595	-0.211982	-0.568236	0.701677	-0.200498	-0.443988	0.458017	0.920824	0.308134	-0.131333	0.367231	-0.438333	0.0181084	-0.321447	-0.146676	-0.215226	-0.481568	-0.0161534	0.20827	0.196055	-0.434183	-0.273468	-0.138795	-0.285622	-0.125838	-0.503945	-0.709878	-0.474202	-0.00251675	0.0388152	0.583407	-0.854991	-0.178983	-0.746519	1.1638	-0.112435	-0.0361227	-0.534142	-0.619014	-0.626847	-0.484472	-0.173903	-0.0685652	-0.177284	0.27499	-0.492315	-0.0275325
-4.594	1.67362	-0.613726	-0.0408827	-0.213044	-0.567531	0.700871	-0.203349	-0.442854	0.457667	0.920556	0.307106	-0.13249	0.363128	-0.437998	0.0198076	-0.322286	-0.147197	-0.214542	-0.480849	-0.014451	0.208067	0.197018	-0.431816	-0.275263	-0.137984	-0.284049	-0.124039	-0.503658	-0.710143	-0.47525	-0.00267336	0.0389805	0.580929	-0.856113	-0.178106	-0.74461	1.1619	-0.113511	-0.035528	-0.533648	-0.620099	-0.627006	-0.484957	-0.173802	-0.0702919	-0.176913	0.28045	-0.493025	-0.0280035
-4.59302	1.66991	-0.614208	-0.0411252	-0.214101	-0.56682	0.700066	-0.206221	-0.441714	0.457303	0.920262	0.306074	-0.133659	0.359007	-0.437669	0.021495	-0.323119	-0.147725	-0.213864	-0.480112	-0.0127406	0.207865	0.197963	-0.429447	-0.277061	-0.137186	-0.282461	-0.122253	-0.503356	-0.710391	-0.476307	-0.00284843	0.0391381	0.57845	-0.857235	-0.177234	-0.742689	1.15998	-0.11459	-0.034944	-0.533139	-0.621187	-0.627162	-0.485435	-0.173696	-0.0720192	-0.176549	0.28592	-0.49373	-0.0284758
-4.59204	1.66619	-0.614698	-0.0413873	-0.215152	-0.566104	0.699264	-0.209113	-0.440568	0.456926	0.919942	0.305039	-0.13484	0.35487	-0.437348	0.0231704	-0.323945	-0.148262	-0.213192	-0.479358	-0.0110222	0.207666	0.198891	-0.427077	-0.27886	-0.136401	-0.280858	-0.12048	-0.503037	-0.710621	-0.477372	-0.00304198	0.0392879	0.575972	-0.858357	-0.176365	-0.740757	1.15806	-0.115674	-0.0343705	-0.532614	-0.622277	-0.627314	-0.485904	-0.173586	-0.0737468	-0.176193	0.291402	-0.49443	-0.0289493
-4.59106	1.66248	-0.615196	-0.0416688	-0.216198	-0.565381	0.698464	-0.212025	-0.439415	0.456536	0.919595	0.303999	-0.136033	0.350715	-0.437032	0.024834	-0.324764	-0.148806	-0.212526	-0.478586	-0.00929599	0.207468	0.1998	-0.424704	-0.280661	-0.13563	-0.27924	-0.118721	-0.502702	-0.710834	-0.478447	-0.00325406	0.03943	0.573495	-0.85948	-0.175501	-0.738815	1.15612	-0.116761	-0.0338074	-0.532073	-0.623371	-0.627464	-0.486365	-0.17347	-0.0754746	-0.175845	0.296894	-0.495125	-0.0294241
-4.59007	1.65877	-0.615702	-0.04197	-0.217239	-0.564652	0.697667	-0.214957	-0.438257	0.456134	0.919222	0.302955	-0.137238	0.346544	-0.436723	0.0264855	-0.325577	-0.149359	-0.211865	-0.477796	-0.00756193	0.207271	0.200691	-0.42233	-0.282464	-0.134872	-0.277608	-0.116976	-0.50235	-0.711031	-0.479531	-0.00348469	0.0395643	0.571018	-0.860603	-0.174641	-0.736862	1.15417	-0.117852	-0.0332548	-0.531516	-0.624467	-0.627609	-0.486817	-0.173349	-0.0772024	-0.175505	0.302396	-0.495814	-0.0299001
-4.58909	1.65506	-0.616215	-0.0422908	-0.218275	-0.563918	0.696871	-0.217908	-0.437092	0.455719	0.918822	0.301907	-0.138454	0.342358	-0.436421	0.028125	-0.326382	-0.149919	-0.211211	-0.476988	-0.00582011	0.207077	0.201564	-0.419954	-0.284268	-0.134128	-0.275961	-0.115245	-0.501983	-0.71121	-0.480623	-0.00373389	0.039691	0.568542	-0.861726	-0.173785	-0.734899	1.15221	-0.118946	-0.0327124	-0.530944	-0.625566	-0.627752	-0.487261	-0.173223	-0.0789301	-0.175174	0.307908	-0.496499	-0.0303774
-4.58811	1.65135	-0.616736	-0.0426313	-0.219306	-0.563178	0.696078	-0.220879	-0.435922	0.455291	0.918397	0.300854	-0.139682	0.338156	-0.436124	0.0297525	-0.32718	-0.150488	-0.210562	-0.476163	-0.00407058	0.206885	0.202419	-0.417577	-0.286074	-0.133397	-0.2743	-0.113529	-0.501599	-0.711372	-0.481724	-0.00400171	0.0398098	0.566066	-0.862849	-0.172933	-0.732925	1.15023	-0.120044	-0.0321803	-0.530356	-0.626667	-0.62789	-0.487697	-0.173093	-0.0806575	-0.17485	0.31343	-0.497179	-0.030856
-4.58712	1.64764	-0.617264	-0.0429916	-0.220332	-0.562433	0.695288	-0.22387	-0.434746	0.45485	0.917946	0.299797	-0.14092	0.333939	-0.435834	0.0313678	-0.327971	-0.151064	-0.209919	-0.475319	-0.00231341	0.206695	0.203256	-0.415198	-0.287881	-0.132681	-0.272625	-0.111827	-0.501199	-0.711518	-0.482834	-0.00428816	0.0399209	0.563591	-0.863973	-0.172086	-0.730941	1.14825	-0.121146	-0.0316582	-0.529752	-0.627771	-0.628025	-0.488123	-0.172957	-0.0823843	-0.174535	0.318961	-0.497854	-0.0313359
-4.58614	1.64394	-0.6178	-0.0433717	-0.221353	-0.561681	0.6945	-0.226879	-0.433564	0.454396	0.917469	0.298735	-0.14217	0.329707	-0.435549	0.0329711	-0.328755	-0.151649	-0.209282	-0.474458	-0.000548662	0.206507	0.204075	-0.412819	-0.28969	-0.131978	-0.270936	-0.11014	-0.500782	-0.711647	-0.483952	-0.00459327	0.0400243	0.561117	-0.865096	-0.171243	-0.728948	1.14625	-0.12225	-0.0311462	-0.529132	-0.628878	-0.628156	-0.488542	-0.172817	-0.0841105	-0.174228	0.324502	-0.498523	-0.031817
-4.58516	1.64024	-0.618343	-0.0437717	-0.222369	-0.560925	0.693714	-0.229907	-0.432377	0.45393	0.916966	0.297669	-0.14343	0.325462	-0.43527	0.0345621	-0.329531	-0.152241	-0.208651	-0.473578	0.0012236	0.206321	0.204875	-0.410438	-0.2915	-0.131288	-0.269233	-0.108469	-0.50035	-0.711759	-0.485079	-0.00491706	0.04012	0.558644	-0.866219	-0.170405	-0.726945	1.14424	-0.123358	-0.0306441	-0.528496	-0.629987	-0.628283	-0.488951	-0.172672	-0.0858358	-0.173929	0.330051	-0.499187	-0.0322995
-4.58417	1.63654	-0.618894	-0.0441916	-0.22338	-0.560162	0.692931	-0.232954	-0.431184	0.453451	0.916438	0.296597	-0.1447	0.321203	-0.434997	0.0361409	-0.3303	-0.152842	-0.208026	-0.472681	0.00300332	0.206138	0.205658	-0.408056	-0.293311	-0.130613	-0.267515	-0.106813	-0.499901	-0.711854	-0.486214	-0.00525955	0.0402079	0.556172	-0.867342	-0.169571	-0.724933	1.14222	-0.124468	-0.0301519	-0.527844	-0.631099	-0.628405	-0.489352	-0.172522	-0.0875601	-0.173639	0.335609	-0.499847	-0.0327833
-4.58319	1.63285	-0.619451	-0.0446315	-0.224385	-0.559395	0.69215	-0.236019	-0.429986	0.45296	0.915884	0.295521	-0.14598	0.316932	-0.43473	0.0377075	-0.331061	-0.153451	-0.207407	-0.471766	0.00479041	0.205957	0.206421	-0.405673	-0.295123	-0.129952	-0.265784	-0.105172	-0.499435	-0.711934	-0.487357	-0.00562078	0.0402881	0.5537	-0.868465	-0.168742	-0.722911	1.14018	-0.125582	-0.0296693	-0.527175	-0.632214	-0.628524	-0.489745	-0.172367	-0.0892833	-0.173357	0.341176	-0.500501	-0.0332684
-4.58221	1.62916	-0.620017	-0.0450914	-0.225387	-0.558622	0.691372	-0.239102	-0.428782	0.452456	0.915305	0.29444	-0.147271	0.312647	-0.434467	0.0392618	-0.331815	-0.154068	-0.206794	-0.470833	0.00658483	0.205779	0.207167	-0.40329	-0.296935	-0.129306	-0.26404	-0.103548	-0.498954	-0.711996	-0.488509	-0.00600075	0.0403606	0.55123	-0.869587	-0.167917	-0.720881	1.13814	-0.126698	-0.0291964	-0.52649	-0.633331	-0.628638	-0.490128	-0.172208	-0.0910051	-0.173083	0.34675	-0.50115	-0.0337548
-4.58122	1.62548	-0.620589	-0.0455713	-0.226383	-0.557844	0.690596	-0.242203	-0.427574	0.451939	0.914702	0.293353	-0.148571	0.308351	-0.434211	0.0408039	-0.332562	-0.154692	-0.206186	-0.469882	0.00838651	0.205603	0.207894	-0.400906	-0.298749	-0.128673	-0.262281	-0.10194	-0.498456	-0.712043	-0.489669	-0.00639949	0.0404253	0.548761	-0.870708	-0.167097	-0.718841	1.13608	-0.127817	-0.0287329	-0.525789	-0.634451	-0.628748	-0.490503	-0.172044	-0.0927254	-0.172818	0.352333	-0.501794	-0.0342426
-4.58024	1.6218	-0.621168	-0.0460713	-0.227374	-0.55706	0.689823	-0.245321	-0.42636	0.45141	0.914073	0.292261	-0.14988	0.304043	-0.433959	0.0423336	-0.3333	-0.155325	-0.205585	-0.468913	0.0101954	0.20543	0.208602	-0.398521	-0.300563	-0.128054	-0.26051	-0.100348	-0.497942	-0.712073	-0.490838	-0.006817	0.0404824	0.546293	-0.871829	-0.166281	-0.716793	1.13401	-0.128938	-0.0282789	-0.525071	-0.635573	-0.628853	-0.490869	-0.171875	-0.094444	-0.172562	0.357922	-0.502432	-0.0347317
-4.57926	1.61813	-0.621754	-0.0465914	-0.228361	-0.556271	0.689053	-0.248457	-0.425141	0.450869	0.913419	0.291164	-0.151199	0.299724	-0.433712	0.043851	-0.334031	-0.155966	-0.20499	-0.467927	0.0120113	0.20526	0.209292	-0.396136	-0.302378	-0.12745	-0.258725	-0.0987732	-0.497411	-0.712088	-0.492014	-0.00725332	0.0405318	0.543826	-0.87295	-0.165471	-0.714737	1.13193	-0.130062	-0.0278342	-0.524337	-0.636698	-0.628954	-0.491227	-0.171702	-0.0961608	-0.172314	0.36352	-0.503066	-0.0352222
-4.57828	1.61446	-0.622348	-0.0471317	-0.229343	-0.555478	0.688285	-0.25161	-0.423918	0.450315	0.912741	0.290062	-0.152527	0.295394	-0.43347	0.0453561	-0.334754	-0.156615	-0.204401	-0.466922	0.0138344	0.205093	0.209964	-0.39375	-0.304194	-0.126861	-0.256926	-0.0972153	-0.496865	-0.712086	-0.493198	-0.00770845	0.0405735	0.54136	-0.874069	-0.164665	-0.712673	1.12984	-0.131188	-0.0273986	-0.523586	-0.637825	-0.62905	-0.491575	-0.171525	-0.0978756	-0.172075	0.369124	-0.503694	-0.0357141
-4.57729	1.6108	-0.622948	-0.0476922	-0.23032	-0.554679	0.68752	-0.25478	-0.42269	0.449749	0.912038	0.288954	-0.153864	0.291054	-0.433233	0.0468488	-0.335469	-0.157273	-0.203819	-0.465899	0.0156644	0.20493	0.210617	-0.391365	-0.30601	-0.126286	-0.255115	-0.0956745	-0.496302	-0.712069	-0.494391	-0.00818241	0.0406076	0.538896	-0.875188	-0.163864	-0.7106	1.12774	-0.132316	-0.026972	-0.522819	-0.638955	-0.629141	-0.491915	-0.171343	-0.0995882	-0.171845	0.374734	-0.504318	-0.0362074
-4.57631	1.60715	-0.623554	-0.048273	-0.231293	-0.553875	0.686757	-0.257966	-0.421457	0.449171	0.911311	0.28784	-0.155209	0.286705	-0.433001	0.0483292	-0.336177	-0.157938	-0.203242	-0.464859	0.0175013	0.204769	0.211251	-0.388979	-0.307826	-0.125725	-0.25329	-0.0941512	-0.495722	-0.712036	-0.495591	-0.00867521	0.040634	0.536432	-0.876306	-0.163068	-0.70852	1.12563	-0.133447	-0.0265544	-0.522035	-0.640087	-0.629227	-0.492246	-0.171157	-0.101298	-0.171623	0.380352	-0.504936	-0.0367021
-4.57533	1.6035	-0.624168	-0.0488739	-0.232261	-0.553066	0.685997	-0.261169	-0.42022	0.44858	0.91056	0.286721	-0.156563	0.282346	-0.432773	0.0497972	-0.336876	-0.158611	-0.202671	-0.4638	0.0193451	0.204611	0.211867	-0.386593	-0.309643	-0.125179	-0.251453	-0.0926455	-0.495127	-0.711987	-0.496799	-0.00918686	0.0406528	0.533971	-0.877422	-0.162277	-0.706433	1.1235	-0.134579	-0.0261456	-0.521234	-0.641221	-0.629308	-0.492568	-0.170966	-0.103006	-0.171411	0.385975	-0.505549	-0.0371983
-4.57434	1.59986	-0.624788	-0.0494952	-0.233225	-0.552252	0.68524	-0.264388	-0.418978	0.447978	0.909785	0.285595	-0.157925	0.277978	-0.432549	0.0512529	-0.337567	-0.159293	-0.202107	-0.462724	0.0211957	0.204457	0.212464	-0.384207	-0.311459	-0.124647	-0.249603	-0.0911578	-0.494515	-0.711923	-0.498014	-0.00971736	0.040664	0.53151	-0.878538	-0.161491	-0.704338	1.12136	-0.135713	-0.0257455	-0.520416	-0.642358	-0.629384	-0.492881	-0.170771	-0.104711	-0.171207	0.391604	-0.506157	-0.0376958
-4.57336	1.59623	-0.625415	-0.0501367	-0.234184	-0.551434	0.684486	-0.267623	-0.417733	0.447363	0.908986	0.284464	-0.159294	0.273602	-0.43233	0.0526962	-0.33825	-0.159983	-0.201548	-0.46163	0.0230529	0.204307	0.213043	-0.381821	-0.313276	-0.124131	-0.247741	-0.0896882	-0.493887	-0.711843	-0.499238	-0.0102667	0.0406675	0.529051	-0.879652	-0.16071	-0.702236	1.11922	-0.136849	-0.0253539	-0.519582	-0.643497	-0.629455	-0.493185	-0.170572	-0.106414	-0.171011	0.397238	-0.506759	-0.0381949
-4.57238	1.5926	-0.626048	-0.0507986	-0.235138	-0.55061	0.683735	-0.270874	-0.416483	0.446736	0.908163	0.283327	-0.160672	0.269218	-0.432115	0.0541271	-0.338924	-0.16068	-0.200996	-0.460518	0.0249168	0.204159	0.213602	-0.379436	-0.315092	-0.123629	-0.245866	-0.0882369	-0.493242	-0.711748	-0.500468	-0.010835	0.0406636	0.526594	-0.880765	-0.159934	-0.700127	1.11706	-0.137986	-0.0249708	-0.51873	-0.644638	-0.62952	-0.49348	-0.170369	-0.108113	-0.170825	0.402878	-0.507357	-0.0386954
-4.57139	1.58899	-0.626687	-0.0514808	-0.236088	-0.549782	0.682986	-0.27414	-0.415229	0.446097	0.907317	0.282184	-0.162056	0.264827	-0.431904	0.0555456	-0.339591	-0.161386	-0.20045	-0.459388	0.0267873	0.204016	0.214144	-0.377051	-0.316908	-0.123141	-0.243978	-0.0868043	-0.492582	-0.711638	-0.501707	-0.0114221	0.0406521	0.524138	-0.881876	-0.159163	-0.698012	1.11489	-0.139125	-0.0245959	-0.517862	-0.645782	-0.62958	-0.493766	-0.170162	-0.10981	-0.170648	0.408522	-0.507949	-0.0391974
-4.57041	1.58538	-0.627333	-0.0521834	-0.237034	-0.54895	0.68224	-0.277421	-0.413972	0.445447	0.906448	0.281035	-0.163448	0.26043	-0.431697	0.0569518	-0.340248	-0.1621	-0.199911	-0.458241	0.0286642	0.203876	0.214666	-0.374666	-0.318724	-0.122669	-0.242079	-0.0853905	-0.491905	-0.711513	-0.502952	-0.0120281	0.040633	0.521683	-0.882986	-0.158398	-0.69589	1.11271	-0.140266	-0.0242292	-0.516977	-0.646927	-0.629634	-0.494043	-0.169951	-0.111503	-0.17048	0.414171	-0.508537	-0.0397009
-4.56943	1.58178	-0.627984	-0.0529063	-0.237975	-0.548113	0.681497	-0.280717	-0.412711	0.444784	0.905555	0.279879	-0.164847	0.256025	-0.431493	0.0583456	-0.340898	-0.162822	-0.199377	-0.457076	0.0305476	0.203741	0.21517	-0.372282	-0.32054	-0.122211	-0.240167	-0.0839956	-0.491212	-0.711373	-0.504205	-0.012653	0.0406065	0.51923	-0.884094	-0.157637	-0.693762	1.11051	-0.141407	-0.0238705	-0.516074	-0.648075	-0.629683	-0.494311	-0.169735	-0.113192	-0.170321	0.419824	-0.509119	-0.040206
-4.56845	1.57819	-0.628642	-0.0536497	-0.238912	-0.547271	0.680756	-0.284028	-0.411446	0.44411	0.904639	0.278717	-0.166253	0.251615	-0.431293	0.0597271	-0.341539	-0.163552	-0.19885	-0.455893	0.0324373	0.203609	0.215655	-0.369899	-0.322354	-0.121769	-0.238243	-0.0826201	-0.490502	-0.711219	-0.505465	-0.0132968	0.0405725	0.516779	-0.885201	-0.156882	-0.691628	1.10831	-0.14255	-0.0235197	-0.515154	-0.649225	-0.629726	-0.49457	-0.169516	-0.114878	-0.170171	0.425481	-0.509696	-0.0407126
-4.56746	1.57461	-0.629306	-0.0544134	-0.239844	-0.546425	0.680019	-0.287353	-0.410178	0.443423	0.903701	0.277549	-0.167665	0.2472	-0.431096	0.0610963	-0.342171	-0.164291	-0.198329	-0.454692	0.0343333	0.203481	0.216121	-0.367516	-0.324168	-0.121341	-0.236308	-0.081264	-0.489777	-0.711049	-0.506732	-0.0139594	0.0405311	0.51433	-0.886305	-0.156133	-0.689488	1.1061	-0.143694	-0.0231767	-0.514218	-0.650377	-0.629763	-0.49482	-0.169293	-0.116561	-0.17003	0.431142	-0.510268	-0.0412207
-4.56648	1.57104	-0.629976	-0.0551975	-0.240773	-0.545575	0.679284	-0.290692	-0.408907	0.442725	0.90274	0.276374	-0.169084	0.242779	-0.430903	0.0624532	-0.342795	-0.165037	-0.197814	-0.453474	0.0362355	0.203358	0.216568	-0.365134	-0.325982	-0.120928	-0.234361	-0.0799276	-0.489035	-0.710865	-0.508006	-0.014641	0.0404822	0.511882	-0.887408	-0.155388	-0.687343	1.10387	-0.144839	-0.0228412	-0.513264	-0.651531	-0.629794	-0.495061	-0.169066	-0.118239	-0.169898	0.436806	-0.510835	-0.0417304
-4.5655	1.56748	-0.630651	-0.056002	-0.241697	-0.54472	0.678553	-0.294045	-0.407632	0.442016	0.901757	0.275192	-0.170509	0.238355	-0.430713	0.0637977	-0.34341	-0.165792	-0.197305	-0.452239	0.0381439	0.203239	0.216997	-0.362754	-0.327794	-0.120531	-0.232402	-0.078611	-0.488277	-0.710667	-0.509287	-0.0153414	0.040426	0.509436	-0.888509	-0.154649	-0.685192	1.10164	-0.145985	-0.0225132	-0.512292	-0.652686	-0.629819	-0.495292	-0.168835	-0.119913	-0.169776	0.442473	-0.511397	-0.0422418
-4.56451	1.56393	-0.631333	-0.056827	-0.242617	-0.543861	0.677824	-0.297412	-0.406355	0.441294	0.900751	0.274004	-0.171939	0.233926	-0.430525	0.06513	-0.344017	-0.166554	-0.196803	-0.450986	0.0400583	0.203124	0.217407	-0.360374	-0.329606	-0.120148	-0.230432	-0.0773146	-0.487503	-0.710454	-0.510575	-0.0160607	0.0403625	0.506992	-0.889607	-0.153916	-0.683036	1.09939	-0.147132	-0.0221925	-0.511304	-0.653844	-0.629838	-0.495515	-0.1686	-0.121584	-0.169662	0.448142	-0.511954	-0.0427547
-4.56353	1.56039	-0.632019	-0.0576723	-0.243533	-0.542998	0.677098	-0.300792	-0.405075	0.440562	0.899724	0.272809	-0.173375	0.229494	-0.430341	0.0664501	-0.344614	-0.167325	-0.196307	-0.449716	0.0419786	0.203014	0.217798	-0.357996	-0.331416	-0.11978	-0.228451	-0.0760384	-0.486713	-0.710227	-0.511869	-0.0167989	0.0402916	0.504549	-0.890704	-0.153188	-0.680875	1.09713	-0.148279	-0.021879	-0.510298	-0.655003	-0.629851	-0.495728	-0.168362	-0.12325	-0.169558	0.453814	-0.512506	-0.0432692
-4.56255	1.55686	-0.632712	-0.058538	-0.244444	-0.542132	0.676375	-0.304185	-0.403792	0.439817	0.898674	0.271607	-0.174816	0.225058	-0.430159	0.0677579	-0.345203	-0.168104	-0.195818	-0.448428	0.0439049	0.202908	0.21817	-0.355618	-0.333225	-0.119428	-0.226458	-0.0747828	-0.485907	-0.709987	-0.51317	-0.0175559	0.0402135	0.502109	-0.891798	-0.152466	-0.67871	1.09487	-0.149427	-0.0215725	-0.509275	-0.656164	-0.629857	-0.495933	-0.16812	-0.124911	-0.169464	0.459488	-0.513053	-0.0437855
-4.56156	1.55335	-0.633409	-0.0594242	-0.245352	-0.541261	0.675655	-0.307591	-0.402507	0.439061	0.897603	0.270399	-0.176262	0.220621	-0.42998	0.0690536	-0.345783	-0.16889	-0.195334	-0.447123	0.045837	0.202808	0.218523	-0.353243	-0.335033	-0.119091	-0.224455	-0.0735478	-0.485084	-0.709732	-0.514478	-0.0183318	0.0401281	0.49967	-0.892889	-0.151749	-0.67654	1.09259	-0.150575	-0.0212728	-0.508235	-0.657327	-0.629857	-0.496128	-0.167875	-0.126568	-0.169379	0.465163	-0.513595	-0.0443033
-4.56058	1.54984	-0.634113	-0.0603307	-0.246255	-0.540386	0.674938	-0.31101	-0.401219	0.438294	0.89651	0.269183	-0.177713	0.216181	-0.429803	0.0703371	-0.346354	-0.169685	-0.194857	-0.445801	0.0477749	0.202712	0.218858	-0.350868	-0.336839	-0.118768	-0.222441	-0.0723337	-0.484246	-0.709463	-0.515792	-0.0191265	0.0400355	0.497233	-0.893978	-0.151038	-0.674365	1.0903	-0.151724	-0.0209798	-0.507177	-0.658491	-0.629851	-0.496314	-0.167626	-0.12822	-0.169303	0.47084	-0.514133	-0.0448229
-4.5596	1.54635	-0.634821	-0.0612576	-0.247155	-0.539507	0.674223	-0.314441	-0.399929	0.437516	0.895397	0.26796	-0.179169	0.211739	-0.429629	0.0716084	-0.346915	-0.170488	-0.194386	-0.444462	0.0497184	0.202621	0.219174	-0.348496	-0.338643	-0.118461	-0.220416	-0.0711407	-0.483391	-0.709181	-0.517112	-0.01994	0.0399358	0.494798	-0.895065	-0.150332	-0.672187	1.088	-0.152873	-0.0206934	-0.506101	-0.659657	-0.629837	-0.496491	-0.167374	-0.129867	-0.169236	0.476518	-0.514665	-0.0453441
-4.55862	1.54287	-0.635534	-0.0622049	-0.24805	-0.538625	0.673512	-0.317883	-0.398638	0.436726	0.894262	0.26673	-0.180629	0.207297	-0.429457	0.0728677	-0.347468	-0.171299	-0.193922	-0.443106	0.0516676	0.202535	0.219471	-0.346125	-0.340446	-0.11817	-0.21838	-0.069969	-0.482521	-0.708886	-0.518439	-0.0207724	0.039829	0.492366	-0.896149	-0.149633	-0.670005	1.08569	-0.154022	-0.0204133	-0.505008	-0.660825	-0.629817	-0.496659	-0.167118	-0.13151	-0.169179	0.482196	-0.515192	-0.0458671
-4.55763	1.53941	-0.636252	-0.0631725	-0.248942	-0.537738	0.672804	-0.321338	-0.397344	0.435925	0.893106	0.265493	-0.182093	0.202854	-0.429286	0.074115	-0.348012	-0.172118	-0.193464	-0.441733	0.0536223	0.202455	0.219749	-0.343755	-0.342247	-0.117893	-0.216334	-0.0688187	-0.481634	-0.708577	-0.519771	-0.0216235	0.0397151	0.489935	-0.897229	-0.148939	-0.667819	1.08337	-0.155171	-0.0201395	-0.503898	-0.661994	-0.629791	-0.496817	-0.166859	-0.133147	-0.169132	0.487875	-0.515715	-0.0463919
-4.55665	1.53595	-0.636975	-0.0641605	-0.24983	-0.536849	0.672098	-0.324804	-0.396049	0.435113	0.89193	0.264248	-0.183561	0.198411	-0.429118	0.0753502	-0.348546	-0.172945	-0.193012	-0.440342	0.0555825	0.20238	0.220008	-0.341388	-0.344045	-0.117631	-0.214278	-0.06769	-0.480732	-0.708254	-0.52111	-0.0224935	0.0395942	0.487506	-0.898307	-0.14825	-0.66563	1.08104	-0.156321	-0.0198718	-0.50277	-0.663164	-0.629757	-0.496967	-0.166596	-0.134779	-0.169094	0.493554	-0.516232	-0.0469184
-4.55567	1.53251	-0.637703	-0.0651688	-0.250714	-0.535955	0.671396	-0.328282	-0.394752	0.43429	0.890733	0.262996	-0.185033	0.193968	-0.428951	0.0765735	-0.349071	-0.17378	-0.192566	-0.438936	0.057548	0.20231	0.220249	-0.339022	-0.345842	-0.117385	-0.212212	-0.0665832	-0.479813	-0.707919	-0.522455	-0.0233822	0.0394664	0.485079	-0.899382	-0.147568	-0.663438	1.07871	-0.15747	-0.0196099	-0.501625	-0.664335	-0.629716	-0.497107	-0.16633	-0.136405	-0.169066	0.499232	-0.516745	-0.0474466
-4.55468	1.52908	-0.638436	-0.0661974	-0.251594	-0.535059	0.670696	-0.33177	-0.393454	0.433456	0.889516	0.261737	-0.186508	0.189526	-0.428785	0.0777848	-0.349587	-0.174623	-0.192127	-0.437512	0.0595189	0.202246	0.220471	-0.336659	-0.347636	-0.117154	-0.210135	-0.0654983	-0.478879	-0.707571	-0.523805	-0.0242896	0.0393316	0.482655	-0.900454	-0.146891	-0.661243	1.07636	-0.158618	-0.0193538	-0.500462	-0.665508	-0.629668	-0.497238	-0.166062	-0.138026	-0.169047	0.50491	-0.517253	-0.0479767
-4.5537	1.52567	-0.639173	-0.0672462	-0.25247	-0.534158	0.67	-0.33527	-0.392154	0.432611	0.888278	0.26047	-0.187986	0.185085	-0.428621	0.0789843	-0.350093	-0.175474	-0.191694	-0.436072	0.0614949	0.202187	0.220674	-0.334298	-0.349428	-0.116938	-0.208049	-0.0644356	-0.477929	-0.70721	-0.525161	-0.0252158	0.0391899	0.480232	-0.901523	-0.146221	-0.659045	1.074	-0.159767	-0.0191032	-0.499281	-0.666682	-0.629613	-0.49736	-0.16579	-0.139641	-0.169038	0.510587	-0.517756	-0.0485086
-4.55272	1.52227	-0.639915	-0.0683153	-0.253343	-0.533255	0.669306	-0.338779	-0.390854	0.431755	0.887022	0.259196	-0.189467	0.180647	-0.428458	0.080172	-0.35059	-0.176333	-0.191268	-0.434615	0.0634762	0.202135	0.220858	-0.331939	-0.351218	-0.116738	-0.205953	-0.0633953	-0.476963	-0.706836	-0.526523	-0.0261607	0.0390414	0.477812	-0.902588	-0.145556	-0.656845	1.07163	-0.160915	-0.0188581	-0.498083	-0.667857	-0.629551	-0.497473	-0.165515	-0.14125	-0.169038	0.516262	-0.518255	-0.0490423
-4.55173	1.51889	-0.64066	-0.0694046	-0.254211	-0.532348	0.668616	-0.342299	-0.389553	0.430888	0.885745	0.257913	-0.190951	0.17621	-0.428296	0.0813479	-0.351078	-0.1772	-0.190848	-0.433142	0.0654625	0.202088	0.221023	-0.329583	-0.353005	-0.116553	-0.203848	-0.0623774	-0.475981	-0.70645	-0.527891	-0.0271242	0.0388862	0.475393	-0.90365	-0.144897	-0.654642	1.06925	-0.162063	-0.0186182	-0.496867	-0.669033	-0.629481	-0.497576	-0.165236	-0.142854	-0.169049	0.521936	-0.518749	-0.0495779
-4.55075	1.51552	-0.641411	-0.0705142	-0.255077	-0.531439	0.667928	-0.345829	-0.388251	0.43001	0.884449	0.256624	-0.192437	0.171776	-0.428136	0.0825121	-0.351556	-0.178075	-0.190434	-0.431653	0.0674538	0.202047	0.22117	-0.327228	-0.354789	-0.116383	-0.201733	-0.0613822	-0.474984	-0.706051	-0.529263	-0.0281064	0.0387243	0.472977	-0.904708	-0.144245	-0.652438	1.06686	-0.163209	-0.0183833	-0.495634	-0.670209	-0.629404	-0.49767	-0.164955	-0.144451	-0.169069	0.527608	-0.519238	-0.0501154
-4.54977	1.51216	-0.642165	-0.0716438	-0.255938	-0.530526	0.667243	-0.349368	-0.386948	0.429122	0.883134	0.255326	-0.193926	0.167345	-0.427975	0.0836647	-0.352024	-0.178958	-0.190026	-0.430147	0.06945	0.202013	0.221298	-0.324877	-0.35657	-0.116228	-0.19961	-0.0604099	-0.473971	-0.70564	-0.530641	-0.0291072	0.0385557	0.470563	-0.905763	-0.143598	-0.650231	1.06446	-0.164356	-0.0181534	-0.494383	-0.671387	-0.629319	-0.497756	-0.164672	-0.146042	-0.169098	0.533277	-0.519723	-0.0506547
-4.54878	1.50882	-0.642923	-0.0727936	-0.256796	-0.52961	0.666562	-0.352917	-0.385646	0.428223	0.8818	0.25402	-0.195416	0.162918	-0.427816	0.0848056	-0.352483	-0.179849	-0.189625	-0.428626	0.0714511	0.201984	0.221407	-0.322528	-0.358348	-0.116088	-0.197477	-0.0594605	-0.472942	-0.705217	-0.532024	-0.0301266	0.0383805	0.468152	-0.906814	-0.142957	-0.648023	1.06205	-0.165501	-0.0179281	-0.493114	-0.672565	-0.629226	-0.497831	-0.164385	-0.147627	-0.169138	0.538944	-0.520204	-0.051196
-4.5478	1.5055	-0.643685	-0.0739635	-0.25765	-0.528691	0.665883	-0.356475	-0.384343	0.427314	0.880447	0.252707	-0.196908	0.158495	-0.427656	0.0859351	-0.352932	-0.180747	-0.189231	-0.427088	0.073457	0.201962	0.221497	-0.320182	-0.360123	-0.115964	-0.195335	-0.0585342	-0.471897	-0.704782	-0.533413	-0.0311645	0.0381988	0.465742	-0.907861	-0.142323	-0.645814	1.05963	-0.166645	-0.0177074	-0.491828	-0.673744	-0.629126	-0.497898	-0.164095	-0.149205	-0.169187	0.544607	-0.520679	-0.0517392
-4.54682	1.50219	-0.64445	-0.0751534	-0.258501	-0.527769	0.665207	-0.360042	-0.38304	0.426394	0.879076	0.251386	-0.198401	0.154077	-0.427497	0.0870531	-0.353371	-0.181654	-0.188842	-0.425534	0.0754675	0.201947	0.221569	-0.317839	-0.361895	-0.115855	-0.193184	-0.0576313	-0.470837	-0.704336	-0.534806	-0.032221	0.0380106	0.463335	-0.908905	-0.141695	-0.643603	1.05721	-0.167789	-0.017491	-0.490524	-0.674924	-0.629018	-0.497956	-0.163803	-0.150777	-0.169247	0.550267	-0.521151	-0.0522844
-4.54584	1.4989	-0.64522	-0.0763633	-0.259349	-0.526845	0.664535	-0.363617	-0.381737	0.425464	0.877687	0.250056	-0.199896	0.149664	-0.427339	0.0881597	-0.353801	-0.182568	-0.18846	-0.423965	0.0774827	0.201938	0.221622	-0.315498	-0.363663	-0.115761	-0.191025	-0.0567518	-0.469761	-0.703877	-0.536204	-0.033296	0.037816	0.46093	-0.909944	-0.141072	-0.641392	1.05477	-0.168931	-0.0172789	-0.489202	-0.676104	-0.628901	-0.498004	-0.163508	-0.152342	-0.169316	0.555923	-0.521617	-0.0528316
-4.54485	1.49562	-0.645992	-0.0775932	-0.260192	-0.525918	0.663865	-0.367201	-0.380435	0.424523	0.876279	0.248719	-0.201391	0.145256	-0.42718	0.089255	-0.354221	-0.18349	-0.188084	-0.422381	0.0795024	0.201936	0.221657	-0.313161	-0.365428	-0.115682	-0.188858	-0.0558958	-0.46867	-0.703407	-0.537607	-0.0343895	0.0376151	0.458527	-0.910979	-0.140457	-0.639179	1.05232	-0.170073	-0.0170707	-0.487863	-0.677284	-0.628777	-0.498043	-0.163211	-0.1539	-0.169395	0.561575	-0.52208	-0.0533807
-4.54387	1.49236	-0.646769	-0.078843	-0.261033	-0.524988	0.663198	-0.370792	-0.379134	0.423572	0.874854	0.247373	-0.202888	0.140855	-0.42702	0.0903391	-0.354631	-0.18442	-0.187715	-0.42078	0.0815266	0.201941	0.221672	-0.310827	-0.367189	-0.115619	-0.186682	-0.0550636	-0.467564	-0.702926	-0.539014	-0.0355013	0.0374079	0.456127	-0.91201	-0.139847	-0.636967	1.04987	-0.171213	-0.0168664	-0.486506	-0.678465	-0.628645	-0.498074	-0.16291	-0.155452	-0.169484	0.567223	-0.522538	-0.0539319
-4.54289	1.48912	-0.647548	-0.0801127	-0.26187	-0.524056	0.662534	-0.374392	-0.377833	0.422611	0.873411	0.246019	-0.204385	0.136459	-0.426861	0.091412	-0.355031	-0.185357	-0.187352	-0.419165	0.0835551	0.201953	0.22167	-0.308496	-0.368946	-0.115571	-0.184498	-0.0542552	-0.466441	-0.702434	-0.540426	-0.0366316	0.0371945	0.453729	-0.913036	-0.139243	-0.634754	1.0474	-0.172351	-0.0166657	-0.485132	-0.679646	-0.628504	-0.498095	-0.162608	-0.156996	-0.169582	0.572865	-0.522992	-0.054485
-4.5419	1.48589	-0.64833	-0.0814021	-0.262704	-0.523121	0.661873	-0.377998	-0.376533	0.42164	0.871951	0.244657	-0.205882	0.132071	-0.426701	0.0924738	-0.355421	-0.186303	-0.186995	-0.417534	0.085588	0.201972	0.221648	-0.306168	-0.370699	-0.115537	-0.182306	-0.0534709	-0.465304	-0.70193	-0.541842	-0.0377802	0.036975	0.451333	-0.914059	-0.138646	-0.632541	1.04493	-0.173488	-0.0164684	-0.48374	-0.680827	-0.628355	-0.498106	-0.162303	-0.158533	-0.169691	0.578503	-0.523442	-0.0550403
-4.54092	1.48269	-0.649116	-0.0827113	-0.263534	-0.522184	0.661215	-0.381612	-0.375234	0.420659	0.870474	0.243287	-0.207379	0.12769	-0.42654	0.0935246	-0.355801	-0.187256	-0.186644	-0.415888	0.0876251	0.201998	0.221609	-0.303844	-0.372448	-0.115519	-0.180106	-0.0527106	-0.464151	-0.701416	-0.543263	-0.0389471	0.0367495	0.44894	-0.915076	-0.138055	-0.630328	1.04245	-0.174624	-0.0162745	-0.48233	-0.682008	-0.628198	-0.498109	-0.161995	-0.160063	-0.16981	0.584134	-0.523887	-0.0555976
-4.53994	1.47949	-0.649904	-0.0840402	-0.264361	-0.521245	0.660561	-0.385233	-0.373937	0.419668	0.868979	0.241908	-0.208875	0.123317	-0.426378	0.0945644	-0.356171	-0.188216	-0.1863	-0.414227	0.0896664	0.202032	0.22155	-0.301523	-0.374193	-0.115516	-0.177899	-0.0519746	-0.462983	-0.700891	-0.544688	-0.0401322	0.0365179	0.446549	-0.916089	-0.137471	-0.628115	1.03996	-0.175758	-0.0160836	-0.480903	-0.68319	-0.628032	-0.498103	-0.161686	-0.161586	-0.169939	0.58976	-0.524328	-0.056157
-4.53895	1.47632	-0.650695	-0.0853888	-0.265185	-0.520303	0.659909	-0.388861	-0.372641	0.418666	0.867469	0.240521	-0.210372	0.118953	-0.426216	0.0955934	-0.356531	-0.189185	-0.185962	-0.412552	0.0917117	0.202073	0.221473	-0.299205	-0.375933	-0.115529	-0.175684	-0.051263	-0.4618	-0.700355	-0.546116	-0.0413356	0.0362805	0.44416	-0.917097	-0.136892	-0.625903	1.03746	-0.17689	-0.0158957	-0.479458	-0.68437	-0.627858	-0.498087	-0.161374	-0.163101	-0.170078	0.59538	-0.524766	-0.0567185
-4.53797	1.47317	-0.651488	-0.086757	-0.266005	-0.519359	0.659259	-0.392495	-0.371347	0.417655	0.865941	0.239125	-0.211867	0.114597	-0.426052	0.0966117	-0.356882	-0.190161	-0.185631	-0.410862	0.093761	0.202121	0.221378	-0.296892	-0.377669	-0.115556	-0.173462	-0.0505759	-0.460601	-0.699809	-0.547549	-0.0425571	0.0360372	0.441774	-0.918101	-0.136321	-0.623692	1.03495	-0.178021	-0.0157104	-0.477995	-0.685551	-0.627675	-0.498063	-0.161059	-0.164609	-0.170227	0.600993	-0.525199	-0.0572821
-4.53699	1.47003	-0.652284	-0.0881446	-0.266823	-0.518413	0.658613	-0.396135	-0.370055	0.416635	0.864398	0.237721	-0.213362	0.11025	-0.425887	0.0976193	-0.357221	-0.191144	-0.185305	-0.409157	0.0958143	0.202178	0.221264	-0.294582	-0.3794	-0.115598	-0.171233	-0.0499134	-0.459387	-0.699252	-0.548986	-0.0437967	0.0357882	0.43939	-0.919099	-0.135755	-0.621482	1.03243	-0.179149	-0.0155277	-0.476515	-0.686731	-0.627483	-0.498029	-0.160743	-0.166108	-0.170386	0.606599	-0.525628	-0.0578478
-4.53601	1.46691	-0.653083	-0.0895517	-0.267637	-0.517466	0.65797	-0.399781	-0.368765	0.415604	0.862839	0.236308	-0.214855	0.105913	-0.42572	0.0986163	-0.357551	-0.192135	-0.184986	-0.407438	0.0978714	0.202242	0.221132	-0.292276	-0.381126	-0.115655	-0.168997	-0.0492756	-0.458159	-0.698686	-0.550426	-0.0450544	0.0355336	0.437008	-0.920093	-0.135196	-0.619273	1.0299	-0.180276	-0.0153474	-0.475018	-0.687911	-0.627282	-0.497987	-0.160425	-0.167601	-0.170555	0.612197	-0.526053	-0.0584158
-4.53502	1.46381	-0.653883	-0.0909783	-0.268448	-0.516516	0.65733	-0.403432	-0.367477	0.414564	0.861264	0.234887	-0.216347	0.101586	-0.425552	0.0996028	-0.357871	-0.193134	-0.184674	-0.405705	0.0999323	0.202314	0.220982	-0.289974	-0.382848	-0.115727	-0.166755	-0.0486626	-0.456915	-0.698109	-0.55187	-0.0463302	0.0352733	0.434629	-0.921081	-0.134644	-0.617066	1.02737	-0.181401	-0.0151692	-0.473503	-0.68909	-0.627073	-0.497935	-0.160104	-0.169085	-0.170735	0.617788	-0.526475	-0.0589859
-4.53404	1.46073	-0.654686	-0.0924241	-0.269256	-0.515565	0.656692	-0.407089	-0.366192	0.413514	0.859674	0.233457	-0.217837	0.0972693	-0.425381	0.100579	-0.35818	-0.19414	-0.184367	-0.403958	0.101997	0.202394	0.220813	-0.287675	-0.384564	-0.115815	-0.164505	-0.0480746	-0.455656	-0.697522	-0.553317	-0.0476238	0.0350076	0.432253	-0.922064	-0.134098	-0.61486	1.02483	-0.182523	-0.0149929	-0.47197	-0.690269	-0.626854	-0.497874	-0.159782	-0.170561	-0.170924	0.623371	-0.526892	-0.0595582
-4.53306	1.45767	-0.65549	-0.0938892	-0.27006	-0.514611	0.656058	-0.410751	-0.36491	0.412455	0.858068	0.232019	-0.219326	0.0929638	-0.425209	0.101545	-0.358479	-0.195154	-0.184067	-0.402197	0.104065	0.202483	0.220627	-0.285381	-0.386275	-0.115917	-0.162249	-0.0475116	-0.454382	-0.696926	-0.554768	-0.0489354	0.0347364	0.429878	-0.923042	-0.133558	-0.612657	1.02227	-0.183643	-0.0148185	-0.470421	-0.691447	-0.626626	-0.497804	-0.159457	-0.172029	-0.171124	0.628945	-0.527306	-0.0601327
-4.53207	1.45462	-0.656296	-0.0953734	-0.270862	-0.513657	0.655426	-0.414417	-0.36363	0.411386	0.856448	0.230571	-0.220812	0.0886698	-0.425035	0.1025	-0.358768	-0.196175	-0.183773	-0.400422	0.106137	0.202579	0.220421	-0.283092	-0.38798	-0.116033	-0.159987	-0.0469737	-0.453094	-0.696321	-0.556221	-0.0502649	0.03446	0.427506	-0.924014	-0.133025	-0.610455	1.01971	-0.184761	-0.0146456	-0.468853	-0.692623	-0.626389	-0.497726	-0.159131	-0.173489	-0.171334	0.634511	-0.527716	-0.0607094
-4.53109	1.4516	-0.657104	-0.0968768	-0.271661	-0.5127	0.654798	-0.418088	-0.362354	0.410308	0.854813	0.229115	-0.222296	0.0843877	-0.424858	0.103446	-0.359046	-0.197203	-0.183485	-0.398634	0.108212	0.202685	0.220198	-0.280806	-0.389681	-0.116165	-0.157719	-0.0464611	-0.451791	-0.695706	-0.557678	-0.0516121	0.0341783	0.425137	-0.924981	-0.132499	-0.608256	1.01715	-0.185877	-0.0144741	-0.467269	-0.693799	-0.626143	-0.497638	-0.158803	-0.174941	-0.171554	0.640067	-0.528123	-0.0612884
-4.53011	1.4486	-0.657913	-0.0983992	-0.272456	-0.511742	0.654172	-0.421763	-0.36108	0.409221	0.853163	0.22765	-0.223777	0.0801179	-0.424678	0.104381	-0.359314	-0.198239	-0.183204	-0.396832	0.110291	0.202798	0.219957	-0.278525	-0.391375	-0.116311	-0.155444	-0.0459738	-0.450473	-0.695081	-0.559138	-0.0529771	0.0338914	0.42277	-0.925942	-0.131979	-0.606059	1.01457	-0.18699	-0.0143039	-0.465667	-0.694974	-0.625887	-0.497542	-0.158473	-0.176385	-0.171784	0.645614	-0.528526	-0.0618696
-4.52912	1.44561	-0.658724	-0.0999405	-0.273249	-0.510783	0.653549	-0.425442	-0.359811	0.408124	0.8515	0.226177	-0.225255	0.0758608	-0.424496	0.105307	-0.359572	-0.199282	-0.182928	-0.395017	0.112373	0.202921	0.219697	-0.276248	-0.393064	-0.116473	-0.153164	-0.045512	-0.44914	-0.694448	-0.560601	-0.0543597	0.0335996	0.420405	-0.926898	-0.131466	-0.603865	1.01199	-0.1881	-0.0141346	-0.464047	-0.696147	-0.625622	-0.497436	-0.158141	-0.17782	-0.172024	0.65115	-0.528925	-0.0624531
-4.52814	1.44265	-0.659535	-0.101501	-0.274039	-0.509822	0.652929	-0.429125	-0.358545	0.407019	0.849822	0.224694	-0.226731	0.0716169	-0.424312	0.106223	-0.359819	-0.200332	-0.182659	-0.39319	0.114458	0.203052	0.21942	-0.273976	-0.394746	-0.116648	-0.150879	-0.0450756	-0.447793	-0.693806	-0.562066	-0.0557599	0.0333027	0.418043	-0.927847	-0.130959	-0.601674	1.0094	-0.189208	-0.0139662	-0.462411	-0.69732	-0.625348	-0.497322	-0.157808	-0.179246	-0.172275	0.656677	-0.529321	-0.0630389
-4.52716	1.4397	-0.660348	-0.10308	-0.274826	-0.50886	0.652311	-0.43281	-0.357283	0.405904	0.848131	0.223203	-0.228203	0.0673866	-0.424124	0.107129	-0.360055	-0.20139	-0.182396	-0.391349	0.116546	0.203192	0.219124	-0.271708	-0.396423	-0.116839	-0.148588	-0.0446648	-0.446431	-0.693155	-0.563534	-0.0571777	0.0330011	0.415683	-0.928791	-0.130459	-0.599486	1.0068	-0.190313	-0.0137983	-0.460757	-0.69849	-0.625063	-0.497199	-0.157473	-0.180664	-0.172536	0.662193	-0.529714	-0.063627
-4.52617	1.43678	-0.661162	-0.104677	-0.27561	-0.507897	0.651697	-0.436499	-0.356025	0.40478	0.846427	0.221702	-0.229671	0.0631704	-0.423933	0.108026	-0.360282	-0.202455	-0.18214	-0.389496	0.118637	0.203341	0.218811	-0.269445	-0.398093	-0.117044	-0.146291	-0.0442797	-0.445055	-0.692495	-0.565005	-0.058613	0.0326947	0.413326	-0.929729	-0.129965	-0.597302	1.00419	-0.191416	-0.0136309	-0.459086	-0.699659	-0.62477	-0.497067	-0.157137	-0.182073	-0.172807	0.667697	-0.530103	-0.0642175
-4.52519	1.43388	-0.661976	-0.106294	-0.276391	-0.506933	0.651085	-0.440191	-0.354772	0.403648	0.844709	0.220193	-0.231136	0.0589686	-0.423738	0.108913	-0.360497	-0.203526	-0.181889	-0.387631	0.120732	0.2035	0.21848	-0.267187	-0.399757	-0.117263	-0.14399	-0.0439203	-0.443664	-0.691827	-0.566478	-0.0600657	0.0323836	0.410971	-0.93066	-0.129478	-0.595121	1.00157	-0.192515	-0.0134638	-0.457398	-0.700827	-0.624466	-0.496926	-0.156799	-0.183473	-0.173089	0.673191	-0.530489	-0.0648102
-4.52421	1.431	-0.662792	-0.107928	-0.277169	-0.505967	0.650476	-0.443885	-0.353523	0.402506	0.842979	0.218674	-0.232597	0.0547817	-0.42354	0.109791	-0.360703	-0.204605	-0.181645	-0.385753	0.122829	0.203667	0.218131	-0.264934	-0.401414	-0.117497	-0.141684	-0.0435867	-0.442259	-0.691151	-0.567953	-0.0615357	0.032068	0.408618	-0.931586	-0.128998	-0.592944	0.998951	-0.193612	-0.0132966	-0.455693	-0.701992	-0.624152	-0.496776	-0.156459	-0.184865	-0.173381	0.678672	-0.530872	-0.0654054
-4.52323	1.42813	-0.663607	-0.109582	-0.277945	-0.505001	0.64987	-0.447582	-0.352279	0.401356	0.841235	0.217147	-0.234053	0.0506102	-0.423339	0.110659	-0.360897	-0.205691	-0.181407	-0.383864	0.12493	0.203844	0.217764	-0.262685	-0.403065	-0.117746	-0.139373	-0.0432789	-0.44084	-0.690467	-0.56943	-0.063023	0.0317479	0.406268	-0.932505	-0.128524	-0.590771	0.996322	-0.194705	-0.0131293	-0.45397	-0.703156	-0.623829	-0.496618	-0.156119	-0.186247	-0.173683	0.684142	-0.531252	-0.0660028
-4.52224	1.42529	-0.664423	-0.111253	-0.278717	-0.504034	0.649267	-0.45128	-0.351039	0.400197	0.83948	0.215611	-0.235505	0.0464543	-0.423133	0.111519	-0.361081	-0.206784	-0.181175	-0.381962	0.127033	0.204031	0.21738	-0.260442	-0.404709	-0.118009	-0.137057	-0.0429971	-0.439406	-0.689775	-0.570909	-0.0645274	0.0314235	0.40392	-0.933418	-0.128057	-0.588602	0.993684	-0.195796	-0.0129617	-0.452231	-0.704318	-0.623495	-0.496451	-0.155777	-0.187621	-0.173996	0.689599	-0.531629	-0.0666027
-4.52126	1.42248	-0.665239	-0.112943	-0.279487	-0.503066	0.648667	-0.45498	-0.349805	0.39903	0.837713	0.214065	-0.236952	0.0423146	-0.422924	0.112369	-0.361254	-0.207884	-0.180949	-0.380049	0.129138	0.204227	0.216977	-0.258204	-0.406345	-0.118286	-0.134737	-0.0427413	-0.437958	-0.689075	-0.572391	-0.066049	0.0310949	0.401575	-0.934324	-0.127597	-0.586438	0.99104	-0.196883	-0.0127935	-0.450475	-0.705477	-0.623152	-0.496275	-0.155433	-0.188985	-0.174319	0.695043	-0.532003	-0.067205
-4.52028	1.41968	-0.666055	-0.114651	-0.280255	-0.502097	0.648069	-0.458682	-0.348577	0.397854	0.835933	0.21251	-0.238395	0.0381915	-0.42271	0.113211	-0.361417	-0.208991	-0.180729	-0.378124	0.131247	0.204433	0.216558	-0.255971	-0.407975	-0.118577	-0.132413	-0.0425115	-0.436497	-0.688367	-0.573873	-0.0675876	0.0307621	0.399232	-0.935224	-0.127144	-0.584278	0.988389	-0.197967	-0.0126246	-0.448702	-0.706634	-0.622798	-0.496091	-0.155089	-0.190341	-0.174652	0.700474	-0.532373	-0.0678096
-4.51929	1.4169	-0.666871	-0.116377	-0.281019	-0.501128	0.647474	-0.462385	-0.347354	0.396669	0.834142	0.210947	-0.239832	0.0340853	-0.422492	0.114044	-0.361569	-0.210105	-0.180515	-0.376188	0.133358	0.204649	0.216121	-0.253743	-0.409597	-0.118883	-0.130084	-0.0423078	-0.435021	-0.687652	-0.575358	-0.0691432	0.0304254	0.396892	-0.936117	-0.126697	-0.582124	0.98573	-0.199048	-0.0124547	-0.446913	-0.707789	-0.622434	-0.495898	-0.154743	-0.191687	-0.174996	0.705891	-0.532741	-0.0684167
-4.51831	1.41415	-0.667687	-0.11812	-0.281781	-0.500158	0.646882	-0.466088	-0.346136	0.395476	0.83234	0.209374	-0.241264	0.0299965	-0.42227	0.114868	-0.36171	-0.211225	-0.180308	-0.374241	0.135471	0.204875	0.215666	-0.251521	-0.411212	-0.119202	-0.127752	-0.0421303	-0.433531	-0.686929	-0.576844	-0.0707157	0.0300847	0.394554	-0.937003	-0.126257	-0.579974	0.983065	-0.200125	-0.0122837	-0.445106	-0.708941	-0.62206	-0.495696	-0.154396	-0.193024	-0.17535	0.711295	-0.533107	-0.0690262
-4.51733	1.41142	-0.668502	-0.119882	-0.28254	-0.499187	0.646292	-0.469792	-0.344925	0.394275	0.830527	0.207792	-0.242691	0.0259254	-0.422043	0.115684	-0.361841	-0.212352	-0.180106	-0.372284	0.137587	0.20511	0.215194	-0.249304	-0.41282	-0.119536	-0.125416	-0.0419789	-0.432028	-0.6862	-0.578331	-0.072305	0.0297403	0.392218	-0.937883	-0.125823	-0.577829	0.980393	-0.201199	-0.0121114	-0.443283	-0.710091	-0.621675	-0.495486	-0.154048	-0.194351	-0.175714	0.716684	-0.533469	-0.0696381
-4.51634	1.4087	-0.669316	-0.121662	-0.283296	-0.498216	0.645705	-0.473496	-0.34372	0.393066	0.828703	0.206201	-0.244111	0.0218726	-0.421811	0.116492	-0.361961	-0.213486	-0.179911	-0.370316	0.139705	0.205357	0.214705	-0.247092	-0.414419	-0.119884	-0.123077	-0.0418538	-0.430511	-0.685463	-0.579819	-0.073911	0.0293922	0.389885	-0.938755	-0.125397	-0.57569	0.977714	-0.202269	-0.0119376	-0.441444	-0.711238	-0.621279	-0.495268	-0.153699	-0.195669	-0.176089	0.722058	-0.533829	-0.0702525
-4.51536	1.40602	-0.67013	-0.123459	-0.28405	-0.497245	0.645121	-0.477201	-0.342521	0.391848	0.826869	0.2046	-0.245526	0.0178383	-0.421574	0.117291	-0.36207	-0.214627	-0.179721	-0.368337	0.141826	0.205613	0.214198	-0.244886	-0.416011	-0.120245	-0.120734	-0.0417549	-0.42898	-0.68472	-0.581309	-0.0755337	0.0290406	0.387554	-0.939621	-0.124976	-0.573557	0.975029	-0.203336	-0.011762	-0.439587	-0.712381	-0.620874	-0.49504	-0.153349	-0.196977	-0.176474	0.727418	-0.534187	-0.0708693
-4.51438	1.40335	-0.670943	-0.125273	-0.284802	-0.496274	0.644539	-0.480905	-0.341329	0.390623	0.825024	0.202991	-0.246934	0.0138229	-0.421331	0.118082	-0.362169	-0.215774	-0.179538	-0.366348	0.143948	0.20588	0.213674	-0.242686	-0.417595	-0.120621	-0.118388	-0.0416823	-0.427435	-0.683969	-0.582799	-0.0771728	0.0286855	0.385225	-0.940479	-0.124563	-0.571429	0.972337	-0.204399	-0.0115846	-0.437715	-0.713522	-0.620457	-0.494805	-0.152998	-0.198276	-0.17687	0.732761	-0.534542	-0.0714887
-4.5134	1.40071	-0.671755	-0.127105	-0.28555	-0.495302	0.64396	-0.484609	-0.340144	0.389389	0.82317	0.201372	-0.248336	0.00982691	-0.421084	0.118865	-0.362256	-0.216927	-0.17936	-0.364349	0.146073	0.206157	0.213133	-0.240492	-0.419171	-0.12101	-0.116039	-0.041636	-0.425877	-0.683213	-0.584291	-0.0788285	0.0283271	0.382899	-0.94133	-0.124157	-0.569308	0.969638	-0.205458	-0.011405	-0.435826	-0.71466	-0.62003	-0.494561	-0.152646	-0.199566	-0.177276	0.73809	-0.534894	-0.0721104
-4.51241	1.39809	-0.672565	-0.128954	-0.286296	-0.49433	0.643384	-0.488311	-0.338966	0.388148	0.821306	0.199744	-0.249732	0.00585066	-0.42083	0.11964	-0.362333	-0.218087	-0.179189	-0.362341	0.1482	0.206445	0.212575	-0.238303	-0.420738	-0.121413	-0.113688	-0.0416161	-0.424306	-0.68245	-0.585783	-0.0805005	0.0279656	0.380576	-0.942174	-0.123757	-0.567193	0.966934	-0.206513	-0.0112231	-0.433921	-0.715794	-0.619592	-0.494309	-0.152293	-0.200845	-0.177692	0.743401	-0.535244	-0.0727347
-4.51143	1.39549	-0.673375	-0.130821	-0.28704	-0.493358	0.642811	-0.492013	-0.337795	0.386898	0.819432	0.198107	-0.25112	0.00189452	-0.420571	0.120408	-0.362399	-0.219254	-0.179023	-0.360323	0.150329	0.206744	0.212	-0.23612	-0.422297	-0.12183	-0.111333	-0.0416225	-0.422721	-0.68168	-0.587275	-0.0821888	0.0276009	0.378254	-0.943011	-0.123364	-0.565084	0.964223	-0.207564	-0.0110388	-0.431999	-0.716925	-0.619143	-0.494048	-0.151939	-0.202115	-0.178119	0.748697	-0.535592	-0.0733615
-4.51045	1.39291	-0.674182	-0.132704	-0.287781	-0.492386	0.642239	-0.495713	-0.336632	0.385641	0.817549	0.19646	-0.252502	-0.00204112	-0.420307	0.121168	-0.362455	-0.220427	-0.178864	-0.358296	0.15246	0.207054	0.211409	-0.233944	-0.423847	-0.12226	-0.108976	-0.0416553	-0.421123	-0.680905	-0.588769	-0.0838933	0.0272334	0.375935	-0.94384	-0.122977	-0.562982	0.961506	-0.208612	-0.0108517	-0.430062	-0.718052	-0.618683	-0.493779	-0.151585	-0.203375	-0.178556	0.753976	-0.535938	-0.0739908
-4.50946	1.39036	-0.674988	-0.134604	-0.288519	-0.491414	0.641671	-0.499412	-0.335476	0.384376	0.815658	0.194804	-0.253876	-0.00595588	-0.420036	0.121921	-0.362499	-0.221606	-0.17871	-0.35626	0.154592	0.207375	0.2108	-0.231773	-0.425388	-0.122704	-0.106617	-0.0417145	-0.419512	-0.680124	-0.590262	-0.0856139	0.026863	0.373618	-0.944662	-0.122598	-0.560887	0.958783	-0.209655	-0.0106618	-0.428108	-0.719176	-0.618212	-0.493502	-0.15123	-0.204625	-0.179004	0.759237	-0.536282	-0.0746226
-4.50848	1.38783	-0.675792	-0.136522	-0.289255	-0.490442	0.641105	-0.503109	-0.334328	0.383104	0.813758	0.193139	-0.255243	-0.00984938	-0.419759	0.122666	-0.362532	-0.222791	-0.178562	-0.354215	0.156727	0.207707	0.210175	-0.229608	-0.426921	-0.123161	-0.104256	-0.0418001	-0.417887	-0.679337	-0.591756	-0.0873505	0.02649	0.371304	-0.945475	-0.122225	-0.558799	0.956054	-0.210694	-0.0104688	-0.426139	-0.720295	-0.61773	-0.493216	-0.150874	-0.205866	-0.179462	0.764481	-0.536624	-0.0752569
-4.5075	1.38532	-0.676595	-0.138455	-0.289989	-0.489471	0.640542	-0.506804	-0.333188	0.381824	0.81185	0.191465	-0.256602	-0.0137213	-0.419475	0.123405	-0.362555	-0.223983	-0.178421	-0.352161	0.158863	0.20805	0.209533	-0.22745	-0.428444	-0.123631	-0.101893	-0.0419122	-0.41625	-0.678544	-0.593249	-0.089103	0.0261144	0.368992	-0.946282	-0.121858	-0.556718	0.95332	-0.211729	-0.0102725	-0.424154	-0.721411	-0.617237	-0.492923	-0.150518	-0.207096	-0.17993	0.769706	-0.536964	-0.0758937
-4.50651	1.38284	-0.677394	-0.140406	-0.29072	-0.4885	0.639981	-0.510496	-0.332057	0.380537	0.809933	0.189781	-0.257953	-0.0175712	-0.419185	0.124136	-0.362567	-0.22518	-0.178285	-0.350099	0.161	0.208405	0.208874	-0.225298	-0.429958	-0.124115	-0.0995281	-0.0420506	-0.414599	-0.677746	-0.594743	-0.0908713	0.0257364	0.366682	-0.94708	-0.121499	-0.554644	0.95058	-0.21276	-0.0100728	-0.422153	-0.722522	-0.616732	-0.492621	-0.150161	-0.208316	-0.180409	0.774914	-0.537302	-0.0765331
-4.50553	1.38038	-0.678192	-0.142373	-0.291449	-0.487529	0.639423	-0.514185	-0.330934	0.379242	0.808009	0.188089	-0.259296	-0.0213987	-0.418889	0.12486	-0.362568	-0.226384	-0.178155	-0.348029	0.16314	0.208771	0.208199	-0.223152	-0.431463	-0.124611	-0.0971616	-0.0422155	-0.412936	-0.676943	-0.596236	-0.0926553	0.0253562	0.364374	-0.94787	-0.121146	-0.552578	0.947834	-0.213786	-0.00986939	-0.420136	-0.72363	-0.616217	-0.492312	-0.149804	-0.209527	-0.180898	0.780103	-0.537638	-0.077175
-4.50455	1.37794	-0.678987	-0.144356	-0.292175	-0.486558	0.638867	-0.517872	-0.32982	0.37794	0.806078	0.186387	-0.260631	-0.0252035	-0.418585	0.125578	-0.362558	-0.227593	-0.178031	-0.345951	0.16528	0.209148	0.207507	-0.221013	-0.432959	-0.125121	-0.0947937	-0.0424068	-0.41126	-0.676134	-0.59773	-0.0944549	0.0249737	0.362069	-0.948653	-0.1208	-0.55052	0.945083	-0.214808	-0.00966217	-0.418104	-0.724732	-0.61569	-0.491994	-0.149446	-0.210727	-0.181398	0.785272	-0.537972	-0.0778194
-4.50356	1.37553	-0.679779	-0.146355	-0.292899	-0.485588	0.638314	-0.521555	-0.328715	0.37663	0.804139	0.184675	-0.261957	-0.0289853	-0.418275	0.126289	-0.362537	-0.228809	-0.177912	-0.343866	0.167423	0.209537	0.2068	-0.21888	-0.434444	-0.125644	-0.0924245	-0.0426244	-0.409571	-0.675321	-0.599222	-0.09627	0.0245893	0.359766	-0.949428	-0.120461	-0.54847	0.942326	-0.215825	-0.00945093	-0.416056	-0.725831	-0.615151	-0.491668	-0.149087	-0.211917	-0.181908	0.790423	-0.538305	-0.0784664
-4.50258	1.37314	-0.680569	-0.148371	-0.29362	-0.484619	0.637763	-0.525235	-0.327619	0.375314	0.802194	0.182955	-0.263275	-0.0327436	-0.417957	0.126994	-0.362506	-0.23003	-0.1778	-0.341773	0.169566	0.209938	0.206075	-0.216753	-0.43592	-0.12618	-0.0900543	-0.0428685	-0.40787	-0.674503	-0.600714	-0.0981005	0.024203	0.357465	-0.950194	-0.120128	-0.546428	0.939565	-0.216838	-0.00923548	-0.413993	-0.726924	-0.614601	-0.491334	-0.148728	-0.213097	-0.182429	0.795553	-0.538637	-0.0791159
-4.5016	1.37077	-0.681355	-0.150402	-0.294339	-0.48365	0.637215	-0.52891	-0.326532	0.37399	0.800242	0.181225	-0.264584	-0.0364782	-0.417632	0.127693	-0.362463	-0.231257	-0.177693	-0.339674	0.171711	0.210351	0.205335	-0.214634	-0.437386	-0.126729	-0.0876833	-0.0431389	-0.406156	-0.67368	-0.602206	-0.0999462	0.023815	0.355166	-0.950952	-0.119802	-0.544394	0.936798	-0.217847	-0.00901562	-0.411915	-0.728013	-0.614039	-0.490993	-0.148369	-0.214267	-0.18296	0.800664	-0.538967	-0.079768
-4.50062	1.36843	-0.682139	-0.152449	-0.295056	-0.482682	0.636669	-0.532582	-0.325455	0.37266	0.798284	0.179486	-0.265884	-0.0401887	-0.417299	0.128385	-0.362409	-0.23249	-0.177592	-0.337567	0.173857	0.210776	0.204579	-0.212521	-0.438842	-0.12729	-0.0853115	-0.0434357	-0.40443	-0.672852	-0.603696	-0.101807	0.0234255	0.35287	-0.951702	-0.119483	-0.542369	0.934027	-0.21885	-0.00879117	-0.409822	-0.729097	-0.613466	-0.490644	-0.14801	-0.215426	-0.183501	0.805754	-0.539295	-0.0804226
-4.49963	1.36611	-0.682918	-0.154512	-0.295771	-0.481714	0.636125	-0.53625	-0.324387	0.371322	0.796319	0.177738	-0.267175	-0.0438747	-0.416959	0.129072	-0.362345	-0.233728	-0.177497	-0.335454	0.176004	0.211213	0.203806	-0.210415	-0.440287	-0.127864	-0.0829393	-0.0437588	-0.402692	-0.672021	-0.605186	-0.103683	0.0230344	0.350576	-0.952443	-0.11917	-0.540353	0.93125	-0.219849	-0.00856194	-0.407713	-0.730176	-0.612881	-0.490287	-0.14765	-0.216576	-0.184053	0.810823	-0.539623	-0.0810798
-4.49865	1.36381	-0.683695	-0.15659	-0.296483	-0.480748	0.635584	-0.539912	-0.32333	0.369978	0.794349	0.17598	-0.268456	-0.0475359	-0.41661	0.129752	-0.36227	-0.234972	-0.177407	-0.333334	0.178153	0.211662	0.203018	-0.208315	-0.441722	-0.128451	-0.0805666	-0.0441082	-0.400941	-0.671185	-0.606674	-0.105574	0.0226421	0.348284	-0.953177	-0.118864	-0.538345	0.928469	-0.220843	-0.00832775	-0.40559	-0.731249	-0.612284	-0.489922	-0.14729	-0.217715	-0.184615	0.815871	-0.539949	-0.0817396
-4.49767	1.36154	-0.684468	-0.158683	-0.297192	-0.479782	0.635046	-0.54357	-0.322283	0.368627	0.792373	0.174214	-0.269727	-0.0511721	-0.416254	0.130427	-0.362183	-0.236221	-0.177323	-0.331209	0.180302	0.212123	0.202214	-0.206223	-0.443147	-0.12905	-0.0781939	-0.0444839	-0.399178	-0.670345	-0.608162	-0.10748	0.0222486	0.345994	-0.953901	-0.118564	-0.536347	0.925683	-0.221832	-0.00808842	-0.403452	-0.732317	-0.611675	-0.489549	-0.14693	-0.218843	-0.185188	0.820897	-0.540274	-0.0824019
-4.49668	1.3593	-0.685237	-0.160792	-0.2979	-0.478817	0.634509	-0.547223	-0.321246	0.367269	0.790393	0.172438	-0.270989	-0.0547827	-0.41589	0.131097	-0.362086	-0.237476	-0.177245	-0.329077	0.182452	0.212597	0.201394	-0.204137	-0.444561	-0.129661	-0.0758211	-0.0448858	-0.397403	-0.669501	-0.609648	-0.1094	0.0218542	0.343706	-0.954617	-0.118272	-0.534358	0.922893	-0.222817	-0.00784376	-0.401299	-0.73338	-0.611054	-0.489169	-0.146569	-0.219962	-0.185771	0.825902	-0.540598	-0.0830667
-4.4957	1.35707	-0.686001	-0.162916	-0.298605	-0.477853	0.633975	-0.55087	-0.32022	0.365905	0.788407	0.170653	-0.272241	-0.0583676	-0.415517	0.131761	-0.361978	-0.238736	-0.177173	-0.32694	0.184603	0.213083	0.200559	-0.202059	-0.445964	-0.130285	-0.0734485	-0.0453139	-0.395616	-0.668653	-0.611132	-0.111336	0.0214588	0.34142	-0.955325	-0.117985	-0.532378	0.920099	-0.223796	-0.00759358	-0.399132	-0.734436	-0.610422	-0.488781	-0.146208	-0.22107	-0.186364	0.830884	-0.540922	-0.0837342
-4.49472	1.35487	-0.686762	-0.165055	-0.299308	-0.47689	0.633444	-0.554512	-0.319204	0.364534	0.786417	0.168859	-0.273482	-0.0619264	-0.415135	0.13242	-0.361859	-0.240001	-0.177106	-0.324798	0.186755	0.213582	0.199708	-0.199988	-0.447356	-0.13092	-0.0710763	-0.0457682	-0.393818	-0.667802	-0.612615	-0.113285	0.0210628	0.339137	-0.956023	-0.117706	-0.530408	0.9173	-0.22477	-0.00733771	-0.39695	-0.735487	-0.609777	-0.488386	-0.145848	-0.222167	-0.186968	0.835844	-0.541244	-0.0844041
-4.49373	1.3527	-0.687518	-0.167209	-0.300008	-0.475929	0.632914	-0.558147	-0.3182	0.363157	0.784422	0.167055	-0.274714	-0.0654588	-0.414745	0.133074	-0.361729	-0.241271	-0.177045	-0.322651	0.188908	0.214093	0.198842	-0.197924	-0.448736	-0.131568	-0.0687046	-0.0462486	-0.392007	-0.666947	-0.614096	-0.115249	0.0206663	0.336855	-0.956713	-0.117433	-0.528447	0.914497	-0.225739	-0.00707597	-0.394754	-0.736532	-0.60912	-0.487984	-0.145487	-0.223254	-0.187582	0.840781	-0.541566	-0.0850767
-4.49275	1.35055	-0.68827	-0.169377	-0.300706	-0.474968	0.632387	-0.561777	-0.317207	0.361773	0.782423	0.165243	-0.275935	-0.0689644	-0.414346	0.133723	-0.361589	-0.242546	-0.176989	-0.320499	0.191061	0.214617	0.19796	-0.195867	-0.450106	-0.132228	-0.0663336	-0.046755	-0.390185	-0.666089	-0.615575	-0.117227	0.0202693	0.334575	-0.957394	-0.117166	-0.526497	0.91169	-0.226703	-0.00680818	-0.392544	-0.737571	-0.608451	-0.487573	-0.145126	-0.224331	-0.188206	0.845694	-0.541887	-0.0857517
-4.49177	1.34842	-0.689017	-0.17156	-0.301402	-0.474009	0.631863	-0.5654	-0.316225	0.360383	0.780421	0.163421	-0.277145	-0.072443	-0.413938	0.134368	-0.361437	-0.243827	-0.17694	-0.318342	0.193215	0.215154	0.197063	-0.193817	-0.451464	-0.1329	-0.0639635	-0.0472874	-0.388352	-0.665227	-0.617052	-0.11922	0.0198721	0.332298	-0.958066	-0.116906	-0.524556	0.90888	-0.227662	-0.00653416	-0.39032	-0.738604	-0.60777	-0.487156	-0.144765	-0.225397	-0.18884	0.850584	-0.542207	-0.0864294
-4.49079	1.34632	-0.68976	-0.173757	-0.302096	-0.473051	0.63134	-0.569016	-0.315255	0.358987	0.778415	0.161591	-0.278344	-0.0758943	-0.413521	0.135008	-0.361274	-0.245112	-0.176895	-0.316181	0.19537	0.215704	0.196151	-0.191775	-0.452811	-0.133583	-0.0615945	-0.0478458	-0.386507	-0.664363	-0.618528	-0.121226	0.0194748	0.330023	-0.958729	-0.116653	-0.522626	0.906065	-0.228615	-0.00625374	-0.388082	-0.73963	-0.607076	-0.486731	-0.144404	-0.226453	-0.189485	0.855451	-0.542527	-0.0871095
-4.4898	1.34424	-0.690497	-0.175969	-0.302787	-0.472094	0.63082	-0.572625	-0.314297	0.357585	0.776406	0.159751	-0.279532	-0.079318	-0.413095	0.135643	-0.361101	-0.246402	-0.176856	-0.314017	0.197525	0.216267	0.195224	-0.189741	-0.454145	-0.134279	-0.0592267	-0.0484301	-0.384651	-0.663496	-0.62	-0.123246	0.0190777	0.327749	-0.959383	-0.116406	-0.520707	0.903247	-0.229563	-0.00596674	-0.38583	-0.74065	-0.60637	-0.4863	-0.144043	-0.227498	-0.190141	0.860292	-0.542846	-0.0877922
-4.48882	1.34219	-0.691229	-0.178194	-0.303477	-0.471139	0.630302	-0.576226	-0.313351	0.356177	0.774394	0.157902	-0.280709	-0.0827137	-0.412659	0.136275	-0.360916	-0.247697	-0.176823	-0.311848	0.19968	0.216843	0.194282	-0.187714	-0.455468	-0.134986	-0.0568603	-0.0490402	-0.382783	-0.662626	-0.621471	-0.12528	0.0186807	0.325478	-0.960028	-0.116165	-0.518797	0.900426	-0.230505	-0.00567299	-0.383565	-0.741663	-0.605651	-0.48586	-0.143682	-0.228532	-0.190806	0.86511	-0.543166	-0.0884775
-4.48784	1.34016	-0.691955	-0.180433	-0.304164	-0.470185	0.629787	-0.579821	-0.312417	0.354762	0.77238	0.156044	-0.281875	-0.0860812	-0.412213	0.136902	-0.360721	-0.248996	-0.176795	-0.309677	0.201836	0.217432	0.193325	-0.185694	-0.456779	-0.135704	-0.0544955	-0.0496761	-0.380904	-0.661753	-0.622939	-0.127328	0.0182841	0.323208	-0.960664	-0.115931	-0.516899	0.897601	-0.231442	-0.00537231	-0.381286	-0.742669	-0.60492	-0.485414	-0.143321	-0.229557	-0.191482	0.869902	-0.543484	-0.0891652
-4.48685	1.33816	-0.692676	-0.182687	-0.304849	-0.469233	0.629273	-0.583407	-0.311495	0.353342	0.770363	0.154178	-0.283029	-0.0894202	-0.411757	0.137525	-0.360515	-0.2503	-0.176773	-0.307502	0.203992	0.218035	0.192353	-0.183682	-0.458078	-0.136434	-0.0521324	-0.0503376	-0.379015	-0.660878	-0.624404	-0.129389	0.0178881	0.320941	-0.96129	-0.115704	-0.515012	0.894773	-0.232374	-0.00506454	-0.378993	-0.743668	-0.604176	-0.484961	-0.142961	-0.23057	-0.192168	0.874669	-0.543803	-0.0898555
-4.48587	1.33618	-0.693392	-0.184953	-0.305531	-0.468282	0.628762	-0.586985	-0.310586	0.351916	0.768344	0.152302	-0.284172	-0.0927303	-0.411292	0.138145	-0.360298	-0.251608	-0.176756	-0.305324	0.206149	0.218651	0.191367	-0.181678	-0.459364	-0.137175	-0.0497713	-0.0510248	-0.377114	-0.660001	-0.625867	-0.131463	0.0174929	0.318675	-0.961907	-0.115482	-0.513135	0.891942	-0.2333	-0.0047495	-0.376688	-0.74466	-0.60342	-0.484501	-0.1426	-0.231573	-0.192864	0.87941	-0.544122	-0.0905483
-4.48489	1.33422	-0.694101	-0.187233	-0.306211	-0.467333	0.628253	-0.590555	-0.30969	0.350484	0.766323	0.150418	-0.285303	-0.0960115	-0.410816	0.138761	-0.36007	-0.252921	-0.176745	-0.303144	0.208305	0.21928	0.190366	-0.179682	-0.460638	-0.137927	-0.0474123	-0.0517375	-0.375203	-0.659122	-0.627327	-0.133551	0.0170985	0.316411	-0.962515	-0.115268	-0.51127	0.889108	-0.23422	-0.00442704	-0.374369	-0.745645	-0.602651	-0.484034	-0.14224	-0.232566	-0.19357	0.884125	-0.544441	-0.0912436
-4.4839	1.33229	-0.694804	-0.189527	-0.30689	-0.466385	0.627746	-0.594116	-0.308807	0.349047	0.764301	0.148524	-0.286421	-0.0992632	-0.410331	0.139374	-0.359831	-0.254238	-0.176739	-0.300961	0.210462	0.219923	0.18935	-0.177693	-0.4619	-0.13869	-0.0450556	-0.0524757	-0.373281	-0.65824	-0.628784	-0.135652	0.0167052	0.314149	-0.963113	-0.115059	-0.509416	0.886271	-0.235134	-0.00409697	-0.372038	-0.746622	-0.601869	-0.48356	-0.14188	-0.233547	-0.194287	0.888814	-0.54476	-0.0919414
-4.48292	1.33038	-0.695501	-0.191833	-0.307566	-0.465439	0.627241	-0.597669	-0.307937	0.347604	0.762278	0.146622	-0.287528	-0.102485	-0.409834	0.139983	-0.359582	-0.255559	-0.176738	-0.298777	0.212619	0.22058	0.188321	-0.175713	-0.463148	-0.139464	-0.0427013	-0.0532392	-0.371348	-0.657357	-0.630237	-0.137765	0.0163131	0.311889	-0.963702	-0.114857	-0.507574	0.883432	-0.236043	-0.00375915	-0.369694	-0.747591	-0.601075	-0.483079	-0.14152	-0.234519	-0.195014	0.893477	-0.545079	-0.0926417
-4.48194	1.3285	-0.696192	-0.194153	-0.308239	-0.464495	0.626738	-0.601212	-0.30708	0.346155	0.760254	0.144711	-0.288622	-0.105678	-0.409327	0.140589	-0.359321	-0.256885	-0.176743	-0.296591	0.214775	0.22125	0.187277	-0.17374	-0.464384	-0.140249	-0.0403496	-0.054028	-0.369405	-0.656471	-0.631688	-0.139892	0.0159223	0.309631	-0.964281	-0.114661	-0.505743	0.88059	-0.236946	-0.00341341	-0.367337	-0.748553	-0.600268	-0.482591	-0.14116	-0.235479	-0.195751	0.898112	-0.545398	-0.0933445
-4.48095	1.32664	-0.696876	-0.196485	-0.308911	-0.463553	0.626238	-0.604746	-0.306237	0.344701	0.758229	0.142791	-0.289704	-0.10884	-0.40881	0.141193	-0.35905	-0.258214	-0.176753	-0.294403	0.216932	0.221934	0.186219	-0.171776	-0.465607	-0.141045	-0.0380007	-0.054842	-0.367451	-0.655585	-0.633135	-0.142031	0.0155332	0.307374	-0.964851	-0.114471	-0.503925	0.877745	-0.237842	-0.00305958	-0.364968	-0.749507	-0.599447	-0.482097	-0.140801	-0.23643	-0.196498	0.902721	-0.545718	-0.0940497
-4.47997	1.32481	-0.697553	-0.19883	-0.30958	-0.462612	0.625739	-0.60827	-0.305408	0.343242	0.756204	0.140863	-0.290774	-0.111972	-0.408281	0.141794	-0.358768	-0.259547	-0.176769	-0.292214	0.219088	0.222632	0.185147	-0.169819	-0.466816	-0.141851	-0.0356547	-0.0556811	-0.365487	-0.654696	-0.634578	-0.144183	0.0151458	0.305119	-0.965411	-0.114288	-0.502118	0.874898	-0.238733	-0.00269751	-0.362586	-0.750453	-0.598614	-0.481596	-0.140441	-0.237369	-0.197255	0.907301	-0.546038	-0.0947574
-4.47899	1.323	-0.698224	-0.201188	-0.310247	-0.461674	0.625243	-0.611784	-0.304593	0.341778	0.754179	0.138926	-0.29183	-0.115073	-0.407742	0.142392	-0.358475	-0.260884	-0.17679	-0.290025	0.221245	0.223344	0.184061	-0.167871	-0.468012	-0.142668	-0.0333119	-0.0565452	-0.363513	-0.653807	-0.636018	-0.146347	0.0147603	0.302866	-0.965961	-0.114111	-0.500323	0.87205	-0.239618	-0.00232704	-0.360192	-0.751391	-0.597767	-0.481089	-0.140083	-0.238298	-0.198022	0.911854	-0.546359	-0.0954676
-4.47801	1.32122	-0.698887	-0.203557	-0.310912	-0.460737	0.624749	-0.615288	-0.303792	0.340308	0.752154	0.13698	-0.292874	-0.118143	-0.407191	0.142988	-0.358172	-0.262225	-0.176816	-0.287834	0.223401	0.224069	0.182962	-0.165931	-0.469195	-0.143496	-0.0309724	-0.0574341	-0.361529	-0.652916	-0.637454	-0.148523	0.0143768	0.300615	-0.966501	-0.113939	-0.498541	0.869199	-0.240497	-0.00194801	-0.357787	-0.75232	-0.596908	-0.480575	-0.139724	-0.239217	-0.198799	0.916379	-0.546681	-0.0961802
-4.47702	1.31946	-0.699543	-0.205939	-0.311575	-0.459802	0.624256	-0.618782	-0.303005	0.338833	0.75013	0.135025	-0.293905	-0.121182	-0.406629	0.143581	-0.357857	-0.263569	-0.176847	-0.285644	0.225557	0.224809	0.181848	-0.163999	-0.470364	-0.144333	-0.0286363	-0.0583479	-0.359535	-0.652024	-0.638887	-0.150712	0.0139956	0.298365	-0.967032	-0.113775	-0.496771	0.866346	-0.241369	-0.00156028	-0.355369	-0.753241	-0.596035	-0.480055	-0.139366	-0.240125	-0.199586	0.920875	-0.547003	-0.0968952
-4.47604	1.31772	-0.700191	-0.208333	-0.312236	-0.458869	0.623766	-0.622264	-0.302232	0.337353	0.748106	0.133062	-0.294922	-0.12419	-0.406055	0.144173	-0.357532	-0.264917	-0.176884	-0.283453	0.227712	0.225563	0.180722	-0.162076	-0.47152	-0.145181	-0.0263039	-0.0592864	-0.357531	-0.651131	-0.640315	-0.152912	0.0136169	0.296117	-0.967553	-0.113616	-0.495013	0.863492	-0.242236	-0.00116369	-0.35294	-0.754153	-0.595149	-0.479529	-0.139008	-0.241022	-0.200383	0.925342	-0.547326	-0.0976126
-4.47506	1.31601	-0.700832	-0.210739	-0.312894	-0.457939	0.623278	-0.625736	-0.301475	0.335868	0.746084	0.131091	-0.295927	-0.127166	-0.405469	0.144762	-0.357197	-0.266268	-0.176926	-0.281263	0.229867	0.226331	0.179581	-0.160161	-0.472661	-0.146039	-0.0239753	-0.0602494	-0.355518	-0.650237	-0.641739	-0.155125	0.0132407	0.293871	-0.968064	-0.113463	-0.493269	0.860636	-0.243096	-0.000758085	-0.3505	-0.755056	-0.59425	-0.478996	-0.13865	-0.241909	-0.201191	0.92978	-0.54765	-0.0983324
-4.47407	1.31433	-0.701465	-0.213156	-0.313551	-0.45701	0.622792	-0.629197	-0.300732	0.334379	0.744063	0.129111	-0.296918	-0.13011	-0.404872	0.14535	-0.35685	-0.267623	-0.176973	-0.279074	0.232021	0.227114	0.178428	-0.158254	-0.473789	-0.146907	-0.0216506	-0.0612368	-0.353494	-0.649343	-0.643159	-0.157349	0.0128673	0.291626	-0.968565	-0.113316	-0.491537	0.857779	-0.24395	-0.000343328	-0.348048	-0.755951	-0.593338	-0.478457	-0.138293	-0.242785	-0.202008	0.934189	-0.547975	-0.0990546
-4.47309	1.31267	-0.70209	-0.215584	-0.314205	-0.456084	0.622308	-0.632646	-0.300004	0.332884	0.742044	0.127123	-0.297895	-0.133022	-0.404263	0.145937	-0.356493	-0.268981	-0.177025	-0.276885	0.234175	0.227911	0.177261	-0.156356	-0.474902	-0.147785	-0.0193301	-0.0622486	-0.351462	-0.648448	-0.644575	-0.159584	0.0124969	0.289383	-0.969056	-0.113175	-0.489818	0.85492	-0.244797	8.07314e-05	-0.345585	-0.756836	-0.592412	-0.477912	-0.137936	-0.243651	-0.202835	0.938568	-0.548301	-0.0997791
-4.47211	1.31103	-0.702706	-0.218025	-0.314856	-0.455159	0.621826	-0.636084	-0.299292	0.331385	0.740027	0.125126	-0.298859	-0.135902	-0.403642	0.146522	-0.356125	-0.270341	-0.177083	-0.274697	0.236328	0.228722	0.176081	-0.154467	-0.476001	-0.148672	-0.0170138	-0.0632846	-0.34942	-0.647553	-0.645986	-0.161831	0.0121297	0.287141	-0.969536	-0.113041	-0.488112	0.85206	-0.245638	0.000514235	-0.343111	-0.757712	-0.591473	-0.477361	-0.13758	-0.244506	-0.203671	0.942917	-0.548628	-0.100506
-4.47112	1.30942	-0.703315	-0.220476	-0.315506	-0.454237	0.621345	-0.639509	-0.298595	0.329881	0.738012	0.123121	-0.299809	-0.138749	-0.403008	0.147105	-0.355747	-0.271705	-0.177145	-0.272511	0.238481	0.229547	0.174889	-0.152586	-0.477086	-0.14957	-0.0147021	-0.0643447	-0.347369	-0.646657	-0.647393	-0.164089	0.0117657	0.284901	-0.970007	-0.112912	-0.486419	0.849199	-0.246473	0.000957326	-0.340627	-0.758579	-0.59052	-0.476804	-0.137224	-0.245351	-0.204518	0.947235	-0.548957	-0.101235
-4.47014	1.30783	-0.703915	-0.222938	-0.316154	-0.453317	0.620867	-0.642923	-0.297914	0.328373	0.736	0.121108	-0.300745	-0.141564	-0.402363	0.147688	-0.355358	-0.273072	-0.177213	-0.270327	0.240633	0.230388	0.173683	-0.150714	-0.478156	-0.150476	-0.0123949	-0.0654288	-0.345308	-0.645761	-0.648795	-0.166358	0.0114053	0.282662	-0.970468	-0.112789	-0.48474	0.846338	-0.247301	0.00141014	-0.338132	-0.759436	-0.589554	-0.476241	-0.136869	-0.246185	-0.205375	0.951523	-0.549287	-0.101967
-4.46916	1.30626	-0.704506	-0.225411	-0.316799	-0.4524	0.620391	-0.646324	-0.297248	0.32686	0.733991	0.119087	-0.301668	-0.144346	-0.401704	0.14827	-0.354958	-0.274442	-0.177286	-0.268145	0.242784	0.231242	0.172465	-0.14885	-0.479212	-0.151392	-0.0100925	-0.0665367	-0.343239	-0.644865	-0.650192	-0.168639	0.0110485	0.280425	-0.970918	-0.112671	-0.483074	0.843475	-0.248122	0.00187282	-0.335626	-0.760284	-0.588574	-0.475672	-0.136513	-0.247009	-0.206241	0.95578	-0.549618	-0.102701
-4.46818	1.30472	-0.705088	-0.227894	-0.317442	-0.451484	0.619916	-0.649712	-0.296598	0.325342	0.731984	0.117057	-0.302576	-0.147095	-0.401033	0.148851	-0.354548	-0.275814	-0.177364	-0.265965	0.244934	0.232112	0.171234	-0.146996	-0.480253	-0.152318	-0.00779508	-0.0676682	-0.34116	-0.643969	-0.651584	-0.170929	0.0106956	0.27819	-0.971359	-0.11256	-0.481422	0.840612	-0.248937	0.00234549	-0.33311	-0.761121	-0.58758	-0.475097	-0.136159	-0.247823	-0.207117	0.960006	-0.549951	-0.103437
-4.46719	1.30321	-0.705661	-0.230388	-0.318083	-0.450571	0.619444	-0.653087	-0.295964	0.323821	0.729982	0.11502	-0.303469	-0.14981	-0.400349	0.149432	-0.354127	-0.277189	-0.177446	-0.263788	0.247084	0.232996	0.16999	-0.14515	-0.481279	-0.153252	-0.00550275	-0.0688234	-0.339073	-0.643073	-0.652971	-0.173231	0.0103468	0.275955	-0.971789	-0.112454	-0.479783	0.837749	-0.249745	0.0028283	-0.330585	-0.761949	-0.586573	-0.474517	-0.135805	-0.248626	-0.208003	0.9642	-0.550285	-0.104175
-4.46621	1.30171	-0.706225	-0.232892	-0.318722	-0.44966	0.618974	-0.656449	-0.295347	0.322295	0.727983	0.112974	-0.304349	-0.152492	-0.399652	0.150012	-0.353696	-0.278566	-0.177534	-0.261614	0.249232	0.233894	0.168734	-0.143313	-0.482289	-0.154196	-0.00321569	-0.0700019	-0.336978	-0.642177	-0.654353	-0.175543	0.0100022	0.273722	-0.972209	-0.112354	-0.478158	0.834886	-0.250546	0.00332136	-0.328049	-0.762767	-0.585552	-0.473931	-0.135451	-0.249419	-0.208898	0.968363	-0.550621	-0.104916
-4.46523	1.30025	-0.70678	-0.235406	-0.319358	-0.448752	0.618505	-0.659797	-0.294746	0.320765	0.725988	0.110921	-0.305214	-0.15514	-0.398942	0.150592	-0.353254	-0.279945	-0.177627	-0.259443	0.25138	0.234808	0.167466	-0.141486	-0.483285	-0.155149	-0.000934061	-0.0712037	-0.334873	-0.641282	-0.655729	-0.177865	0.009662	0.271491	-0.972618	-0.11226	-0.476547	0.832022	-0.251341	0.00382481	-0.325504	-0.763574	-0.584518	-0.47334	-0.135097	-0.250201	-0.209803	0.972493	-0.550959	-0.105658
-4.46424	1.2988	-0.707325	-0.23793	-0.319993	-0.447846	0.618038	-0.663132	-0.294161	0.319231	0.723997	0.10886	-0.306065	-0.157754	-0.398219	0.151172	-0.352802	-0.281327	-0.177725	-0.257275	0.253526	0.235736	0.166186	-0.139667	-0.484265	-0.15611	0.00134199	-0.0724286	-0.33276	-0.640387	-0.657101	-0.180197	0.00932644	0.269261	-0.973017	-0.112171	-0.47495	0.829158	-0.252128	0.00433877	-0.322949	-0.764371	-0.583469	-0.472743	-0.134744	-0.250973	-0.210718	0.976591	-0.551299	-0.106403
-4.46326	1.29738	-0.70786	-0.240464	-0.320625	-0.446943	0.617573	-0.666453	-0.293594	0.317692	0.722011	0.106791	-0.3069	-0.160335	-0.397483	0.151752	-0.352339	-0.282711	-0.177828	-0.255111	0.255671	0.236679	0.164894	-0.137857	-0.48523	-0.15708	0.00361229	-0.0736765	-0.330639	-0.639493	-0.658466	-0.18254	0.00899568	0.267032	-0.973406	-0.112088	-0.473368	0.826295	-0.252909	0.00486337	-0.320385	-0.765157	-0.582407	-0.472141	-0.134392	-0.251735	-0.211642	0.980657	-0.551641	-0.10715
-4.46228	1.29599	-0.708385	-0.243008	-0.321255	-0.446042	0.617111	-0.66976	-0.293043	0.31615	0.720029	0.104714	-0.307721	-0.162881	-0.396732	0.152333	-0.351866	-0.284097	-0.177936	-0.252952	0.257815	0.237637	0.16359	-0.136057	-0.486179	-0.158059	0.00587669	-0.0749472	-0.32851	-0.6386	-0.659827	-0.184892	0.00866991	0.264804	-0.973784	-0.11201	-0.471799	0.823432	-0.253683	0.00539872	-0.317812	-0.765933	-0.581331	-0.471534	-0.13404	-0.252486	-0.212575	0.984689	-0.551985	-0.1079
-4.46129	1.29462	-0.708901	-0.24556	-0.321883	-0.445143	0.616649	-0.673052	-0.292509	0.314605	0.718053	0.102629	-0.308528	-0.165393	-0.395969	0.152914	-0.351383	-0.285485	-0.178049	-0.250797	0.259958	0.23861	0.162274	-0.134266	-0.487113	-0.159046	0.00813504	-0.0762406	-0.326373	-0.637707	-0.661181	-0.187254	0.00834932	0.262578	-0.974152	-0.111938	-0.470245	0.820569	-0.254449	0.00594495	-0.31523	-0.766697	-0.58024	-0.470921	-0.133688	-0.253228	-0.213518	0.988688	-0.55233	-0.108651
-4.46031	1.29327	-0.709406	-0.248122	-0.322508	-0.444247	0.61619	-0.676329	-0.291992	0.313055	0.716082	0.100537	-0.309319	-0.16787	-0.395191	0.153495	-0.350889	-0.286875	-0.178167	-0.248647	0.2621	0.239598	0.160946	-0.132484	-0.48803	-0.160042	0.0103872	-0.0775565	-0.324228	-0.636816	-0.66253	-0.189625	0.0080341	0.260353	-0.97451	-0.111871	-0.468706	0.817707	-0.255209	0.00650217	-0.31264	-0.767451	-0.579136	-0.470303	-0.133337	-0.253959	-0.214471	0.992654	-0.552678	-0.109405
-4.45933	1.29194	-0.7099	-0.250693	-0.323131	-0.443354	0.615733	-0.679592	-0.291493	0.311501	0.714117	0.0984377	-0.310095	-0.170312	-0.3944	0.154078	-0.350385	-0.288266	-0.17829	-0.246501	0.26424	0.240601	0.159607	-0.130711	-0.488932	-0.161046	0.0126329	-0.0788947	-0.322075	-0.635925	-0.663872	-0.192005	0.00772443	0.258129	-0.974857	-0.111809	-0.467181	0.814846	-0.255962	0.00707049	-0.310041	-0.768193	-0.578018	-0.46968	-0.132987	-0.25468	-0.215433	0.996587	-0.553029	-0.11016
-4.45834	1.29064	-0.710384	-0.253273	-0.323752	-0.442463	0.615277	-0.682839	-0.291012	0.309945	0.712158	0.0963306	-0.310857	-0.17272	-0.393594	0.154661	-0.349871	-0.289659	-0.178417	-0.244361	0.266379	0.241619	0.158257	-0.128948	-0.489818	-0.162057	0.0148722	-0.0802552	-0.319914	-0.635036	-0.665209	-0.194395	0.00742052	0.255906	-0.975193	-0.111753	-0.465671	0.811986	-0.256707	0.00765002	-0.307433	-0.768925	-0.576885	-0.469052	-0.132636	-0.255391	-0.216404	1.00048	-0.553382	-0.110918
-4.45736	1.28936	-0.710857	-0.255861	-0.324371	-0.441575	0.614824	-0.686071	-0.290547	0.308384	0.710205	0.0942162	-0.311603	-0.175093	-0.392775	0.155246	-0.349346	-0.291053	-0.178549	-0.242227	0.268516	0.242652	0.156895	-0.127194	-0.490687	-0.163077	0.0171048	-0.0816376	-0.317745	-0.634148	-0.666539	-0.196794	0.00712255	0.253684	-0.975519	-0.111702	-0.464175	0.809126	-0.257445	0.00824088	-0.304818	-0.769645	-0.575739	-0.46842	-0.132287	-0.256091	-0.217384	1.00435	-0.553737	-0.111677
-4.45638	1.28811	-0.711319	-0.258458	-0.324988	-0.440689	0.614372	-0.689287	-0.290101	0.30682	0.708259	0.0920945	-0.312333	-0.17743	-0.391941	0.155832	-0.348811	-0.292449	-0.178687	-0.240099	0.270652	0.243701	0.155523	-0.125449	-0.491541	-0.164105	0.0193305	-0.0830418	-0.31557	-0.633261	-0.667863	-0.199201	0.00683072	0.251463	-0.975834	-0.111657	-0.462694	0.806269	-0.258176	0.00884316	-0.302195	-0.770353	-0.574578	-0.467782	-0.131937	-0.256782	-0.218374	1.00818	-0.554094	-0.112439
-4.4554	1.28688	-0.71177	-0.261063	-0.325602	-0.439806	0.613922	-0.692487	-0.289673	0.305253	0.706319	0.0899656	-0.313049	-0.179733	-0.391092	0.156419	-0.348266	-0.293845	-0.178829	-0.237976	0.272787	0.244764	0.154139	-0.123715	-0.492377	-0.165141	0.0215493	-0.0844677	-0.313387	-0.632376	-0.669181	-0.201618	0.00654522	0.249244	-0.976139	-0.111616	-0.461229	0.803412	-0.2589	0.00945697	-0.299564	-0.771049	-0.573403	-0.46714	-0.131588	-0.257463	-0.219373	1.01197	-0.554455	-0.113203
-4.45441	1.28567	-0.712209	-0.263676	-0.326214	-0.438925	0.613473	-0.695671	-0.289263	0.303682	0.704387	0.0878296	-0.313749	-0.182	-0.39023	0.157008	-0.347711	-0.295243	-0.178975	-0.235861	0.274919	0.245842	0.152744	-0.121989	-0.493197	-0.166184	0.023761	-0.0859152	-0.311196	-0.631492	-0.670492	-0.204042	0.00626624	0.247025	-0.976433	-0.111581	-0.459778	0.800557	-0.259616	0.0100824	-0.296926	-0.771734	-0.572214	-0.466493	-0.13124	-0.258133	-0.22038	1.01573	-0.554818	-0.113968
-4.45343	1.28449	-0.712638	-0.266297	-0.326824	-0.438048	0.613027	-0.698839	-0.288871	0.302108	0.702462	0.0856864	-0.314433	-0.184231	-0.389352	0.157599	-0.347146	-0.296642	-0.179127	-0.233752	0.27705	0.246936	0.151339	-0.120274	-0.494001	-0.167235	0.0259654	-0.0873839	-0.308999	-0.63061	-0.671797	-0.206475	0.00599398	0.244808	-0.976717	-0.11155	-0.458343	0.797704	-0.260325	0.0107196	-0.29428	-0.772406	-0.571011	-0.465841	-0.130892	-0.258794	-0.221397	1.01946	-0.555183	-0.114736
-4.45245	1.28333	-0.713054	-0.268926	-0.327431	-0.437172	0.612582	-0.70199	-0.288497	0.300531	0.700545	0.0835364	-0.315102	-0.186427	-0.38846	0.158192	-0.34657	-0.298041	-0.179283	-0.23165	0.27918	0.248045	0.149923	-0.118568	-0.494788	-0.168293	0.0281624	-0.0888737	-0.306795	-0.62973	-0.673095	-0.208916	0.00572863	0.242591	-0.97699	-0.111525	-0.456923	0.794853	-0.261026	0.0113686	-0.291628	-0.773067	-0.569793	-0.465185	-0.130544	-0.259445	-0.222424	1.02315	-0.555552	-0.115505
-4.45146	1.28219	-0.713459	-0.271563	-0.328037	-0.4363	0.612139	-0.705124	-0.288142	0.298951	0.698636	0.0813794	-0.315755	-0.188587	-0.387552	0.158787	-0.345985	-0.299442	-0.179444	-0.229556	0.281308	0.249169	0.148497	-0.116872	-0.495558	-0.169359	0.0303518	-0.0903846	-0.304583	-0.628852	-0.674386	-0.211365	0.00547039	0.240376	-0.977252	-0.111505	-0.455518	0.792003	-0.26172	0.0120295	-0.288969	-0.773715	-0.56856	-0.464525	-0.130197	-0.260086	-0.223459	1.0268	-0.555923	-0.116276
-4.45048	1.28108	-0.713851	-0.274206	-0.328639	-0.43543	0.611698	-0.708241	-0.287805	0.297368	0.696735	0.0792156	-0.316393	-0.190711	-0.38663	0.159384	-0.345389	-0.300843	-0.17961	-0.227469	0.283433	0.250309	0.14706	-0.115185	-0.49631	-0.170432	0.0325335	-0.0919161	-0.302366	-0.627975	-0.67567	-0.213822	0.00521946	0.238161	-0.977504	-0.111489	-0.454129	0.789156	-0.262406	0.0127024	-0.286303	-0.774351	-0.567314	-0.46386	-0.12985	-0.260717	-0.224502	1.03042	-0.556298	-0.117049
-4.4495	1.27999	-0.714232	-0.276857	-0.32924	-0.434563	0.611259	-0.711341	-0.287487	0.295782	0.694842	0.0770451	-0.317014	-0.1928	-0.385693	0.159984	-0.344784	-0.302244	-0.17978	-0.22539	0.285557	0.251463	0.145613	-0.113509	-0.497046	-0.171511	0.0347074	-0.0934683	-0.300141	-0.627101	-0.676947	-0.216287	0.00497602	0.235947	-0.977745	-0.111478	-0.452755	0.786312	-0.263084	0.0133874	-0.283631	-0.774974	-0.566053	-0.463191	-0.129503	-0.261339	-0.225555	1.034	-0.556675	-0.117824
-4.44851	1.27892	-0.7146	-0.279515	-0.329838	-0.433698	0.610821	-0.714424	-0.287188	0.294194	0.692958	0.0748679	-0.31762	-0.194852	-0.38474	0.160586	-0.344168	-0.303645	-0.179955	-0.22332	0.287679	0.252633	0.144156	-0.111842	-0.497765	-0.172598	0.0368732	-0.0950408	-0.29791	-0.626229	-0.678217	-0.218759	0.00474029	0.233735	-0.977976	-0.111472	-0.451397	0.783469	-0.263755	0.0140845	-0.280952	-0.775584	-0.564777	-0.462518	-0.129157	-0.261951	-0.226617	1.03754	-0.557056	-0.1186
-4.44753	1.27787	-0.714955	-0.28218	-0.330434	-0.432836	0.610385	-0.717488	-0.286908	0.292602	0.691084	0.0726842	-0.31821	-0.196868	-0.383772	0.161191	-0.343543	-0.305047	-0.180135	-0.221258	0.2898	0.253818	0.142689	-0.110185	-0.498466	-0.173692	0.039031	-0.0966335	-0.295673	-0.625359	-0.67948	-0.221238	0.00451244	0.231523	-0.978196	-0.111471	-0.450054	0.78063	-0.264418	0.014794	-0.278268	-0.776182	-0.563487	-0.461841	-0.12881	-0.262553	-0.227687	1.04105	-0.55744	-0.119379
-4.44655	1.27685	-0.715298	-0.284851	-0.331028	-0.431977	0.609951	-0.720534	-0.286647	0.291008	0.689218	0.0704941	-0.318784	-0.198848	-0.382788	0.161799	-0.342908	-0.306449	-0.180319	-0.219205	0.291918	0.255019	0.141212	-0.108539	-0.49915	-0.174792	0.0411804	-0.0982462	-0.29343	-0.624491	-0.680736	-0.223724	0.00429269	0.229311	-0.978405	-0.111474	-0.448727	0.777793	-0.265074	0.0155157	-0.275578	-0.776767	-0.562182	-0.46116	-0.128465	-0.263145	-0.228766	1.04452	-0.557827	-0.120158
-4.44557	1.27585	-0.715628	-0.287528	-0.331619	-0.431121	0.609519	-0.723563	-0.286406	0.289411	0.687362	0.0682976	-0.319342	-0.200791	-0.381789	0.162411	-0.342263	-0.307851	-0.180508	-0.217162	0.294034	0.256234	0.139726	-0.106902	-0.499816	-0.175899	0.0433215	-0.0998787	-0.29118	-0.623626	-0.681984	-0.226217	0.00408123	0.227101	-0.978603	-0.111482	-0.447416	0.774959	-0.265721	0.0162499	-0.272883	-0.777338	-0.560863	-0.460475	-0.128119	-0.263729	-0.229854	1.04796	-0.558218	-0.12094
-4.44458	1.27487	-0.715945	-0.290212	-0.332208	-0.430267	0.609088	-0.726572	-0.286183	0.287812	0.685516	0.0660948	-0.319884	-0.202698	-0.380774	0.163025	-0.341608	-0.309253	-0.180702	-0.215127	0.296148	0.257465	0.13823	-0.105275	-0.500464	-0.177012	0.0454539	-0.101531	-0.288925	-0.622763	-0.683225	-0.228717	0.00387826	0.224891	-0.978791	-0.111495	-0.446121	0.772129	-0.266361	0.0169965	-0.270183	-0.777897	-0.559529	-0.459786	-0.127774	-0.264302	-0.23095	1.05136	-0.558612	-0.121723
-4.4436	1.27391	-0.716248	-0.292902	-0.332795	-0.429416	0.60866	-0.729563	-0.28598	0.286211	0.683681	0.0638859	-0.32041	-0.204568	-0.379743	0.163643	-0.340944	-0.310654	-0.1809	-0.213103	0.298259	0.258711	0.136725	-0.103659	-0.501095	-0.178132	0.0475777	-0.103202	-0.286664	-0.621903	-0.684458	-0.231224	0.00368397	0.222682	-0.978968	-0.111512	-0.444842	0.769302	-0.266993	0.0177557	-0.267477	-0.778442	-0.55818	-0.459094	-0.127429	-0.264866	-0.232055	1.05472	-0.559009	-0.122508
-4.44262	1.27298	-0.716539	-0.295598	-0.333379	-0.428568	0.608233	-0.732535	-0.285797	0.284607	0.681855	0.0616709	-0.32092	-0.206402	-0.378697	0.164265	-0.340269	-0.312055	-0.181102	-0.211088	0.300369	0.259973	0.13521	-0.102053	-0.501708	-0.179258	0.0496927	-0.104893	-0.284397	-0.621045	-0.685683	-0.233737	0.00349856	0.220474	-0.979135	-0.111533	-0.443578	0.766478	-0.267617	0.0185275	-0.264767	-0.778973	-0.556817	-0.458398	-0.127084	-0.265421	-0.233168	1.05804	-0.55941	-0.123294
-4.44163	1.27206	-0.716816	-0.298299	-0.333961	-0.427722	0.607807	-0.735488	-0.285633	0.283	0.680041	0.0594499	-0.321413	-0.2082	-0.377634	0.16489	-0.339586	-0.313455	-0.18131	-0.209084	0.302476	0.26125	0.133686	-0.100457	-0.502303	-0.18039	0.0517987	-0.106602	-0.282125	-0.62019	-0.686901	-0.236256	0.00332224	0.218266	-0.97929	-0.111559	-0.442331	0.763658	-0.268232	0.0193119	-0.262052	-0.779491	-0.555439	-0.457698	-0.12674	-0.265967	-0.234289	1.06132	-0.559815	-0.124082
-4.44065	1.27117	-0.717079	-0.301006	-0.334541	-0.426879	0.607384	-0.738422	-0.285489	0.281392	0.678237	0.057223	-0.321891	-0.20996	-0.376555	0.165519	-0.338892	-0.314855	-0.181521	-0.207091	0.304581	0.262542	0.132153	-0.098871	-0.50288	-0.181528	0.0538957	-0.108331	-0.279847	-0.619338	-0.688111	-0.238781	0.00315519	0.216059	-0.979436	-0.111588	-0.4411	0.760842	-0.26884	0.0201091	-0.259333	-0.779995	-0.554046	-0.456995	-0.126396	-0.266503	-0.235419	1.06457	-0.560224	-0.124872
-4.43967	1.2703	-0.717328	-0.303719	-0.335118	-0.426039	0.606962	-0.741336	-0.285365	0.279782	0.676445	0.0549903	-0.322352	-0.211684	-0.37546	0.166152	-0.338189	-0.316253	-0.181737	-0.205108	0.306684	0.263849	0.130612	-0.0972957	-0.503438	-0.182672	0.0559834	-0.110078	-0.277564	-0.618489	-0.689313	-0.241312	0.00299763	0.213853	-0.97957	-0.111622	-0.439885	0.758029	-0.26944	0.0209191	-0.25661	-0.780485	-0.552638	-0.456289	-0.126051	-0.26703	-0.236557	1.06778	-0.560636	-0.125662
-4.43868	1.26946	-0.717563	-0.306436	-0.335692	-0.425202	0.606542	-0.74423	-0.285261	0.278169	0.674664	0.052752	-0.322797	-0.213371	-0.374348	0.16679	-0.337476	-0.317651	-0.181958	-0.203137	0.308784	0.265172	0.129061	-0.0957308	-0.503979	-0.183822	0.0580617	-0.111843	-0.275276	-0.617643	-0.690507	-0.243849	0.00284974	0.211647	-0.979694	-0.111661	-0.438687	0.755221	-0.270031	0.0217419	-0.253883	-0.780961	-0.551216	-0.45558	-0.125707	-0.267548	-0.237703	1.07095	-0.561052	-0.126454
-4.4377	1.26863	-0.717784	-0.309158	-0.336265	-0.424367	0.606123	-0.747104	-0.285177	0.276555	0.672894	0.0505081	-0.323225	-0.215022	-0.37322	0.167431	-0.336754	-0.319048	-0.182183	-0.201177	0.310882	0.266509	0.127502	-0.0941763	-0.504501	-0.184978	0.0601306	-0.113626	-0.272983	-0.616799	-0.691693	-0.246391	0.00271174	0.209442	-0.979807	-0.111703	-0.437504	0.752417	-0.270615	0.0225777	-0.251152	-0.781423	-0.549778	-0.454867	-0.125363	-0.268056	-0.238858	1.07408	-0.561472	-0.127248
-4.43672	1.26783	-0.717991	-0.311885	-0.336835	-0.423535	0.605707	-0.749958	-0.285113	0.274939	0.671137	0.0482587	-0.323638	-0.216635	-0.372076	0.168078	-0.336023	-0.320443	-0.182413	-0.199229	0.312977	0.267862	0.125935	-0.0926323	-0.505004	-0.186139	0.0621898	-0.115428	-0.270685	-0.615959	-0.69287	-0.248938	0.0025838	0.207237	-0.97991	-0.111749	-0.436338	0.749618	-0.27119	0.0234263	-0.248418	-0.781871	-0.548326	-0.454151	-0.125019	-0.268556	-0.24002	1.07717	-0.561896	-0.128043
-4.43574	1.26704	-0.718183	-0.314617	-0.337402	-0.422706	0.605292	-0.752791	-0.28507	0.273321	0.669392	0.0460039	-0.324033	-0.218212	-0.370915	0.168729	-0.335282	-0.321837	-0.182646	-0.197293	0.315069	0.269231	0.124359	-0.0910988	-0.50549	-0.187305	0.0642393	-0.117247	-0.268382	-0.615122	-0.694039	-0.251491	0.00246615	0.205032	-0.980002	-0.111799	-0.435189	0.746823	-0.271757	0.024288	-0.245681	-0.782304	-0.546859	-0.453432	-0.124675	-0.269047	-0.24119	1.08022	-0.562324	-0.128839
-4.43475	1.26628	-0.71836	-0.317353	-0.337967	-0.421879	0.604879	-0.755604	-0.285046	0.271701	0.66766	0.0437439	-0.324413	-0.219751	-0.369737	0.169384	-0.334532	-0.323229	-0.182885	-0.195369	0.317159	0.270614	0.122775	-0.0895759	-0.505956	-0.188477	0.066279	-0.119083	-0.266075	-0.614288	-0.6952	-0.254048	0.00235897	0.202829	-0.980083	-0.111853	-0.434056	0.744033	-0.272315	0.0251627	-0.242941	-0.782723	-0.545377	-0.452711	-0.124331	-0.269529	-0.242368	1.08324	-0.562756	-0.129636
-4.43377	1.26554	-0.718523	-0.320093	-0.33853	-0.421055	0.604468	-0.758395	-0.285043	0.27008	0.665941	0.0414787	-0.324776	-0.221254	-0.368542	0.170045	-0.333772	-0.32462	-0.183127	-0.193458	0.319247	0.272012	0.121183	-0.0880637	-0.506404	-0.189654	0.0683086	-0.120937	-0.263763	-0.613458	-0.696352	-0.25661	0.00226246	0.200625	-0.980154	-0.111911	-0.432939	0.741248	-0.272865	0.0260505	-0.240199	-0.783127	-0.543879	-0.451986	-0.123987	-0.270002	-0.243554	1.08621	-0.563192	-0.130435
-4.43279	1.26482	-0.71867	-0.322837	-0.33909	-0.420234	0.604058	-0.761166	-0.285061	0.268457	0.664234	0.0392085	-0.325123	-0.222719	-0.36733	0.170711	-0.333004	-0.326009	-0.183375	-0.19156	0.321331	0.273426	0.119583	-0.0865621	-0.506833	-0.190836	0.0703282	-0.122807	-0.261447	-0.612631	-0.697496	-0.259177	0.00217682	0.198422	-0.980214	-0.111973	-0.431839	0.738468	-0.273407	0.0269513	-0.237454	-0.783517	-0.542367	-0.451259	-0.123643	-0.270467	-0.244748	1.08915	-0.563633	-0.131235
-4.4318	1.26412	-0.718803	-0.325585	-0.339647	-0.419415	0.60365	-0.763915	-0.285099	0.266832	0.662541	0.0369333	-0.325453	-0.224148	-0.366102	0.171382	-0.332226	-0.327396	-0.183626	-0.189675	0.323413	0.274855	0.117975	-0.0850713	-0.507243	-0.192023	0.0723375	-0.124695	-0.259126	-0.611807	-0.698631	-0.261748	0.00210225	0.196219	-0.980263	-0.112038	-0.430755	0.735693	-0.27394	0.0278653	-0.234707	-0.783891	-0.54084	-0.450529	-0.123299	-0.270922	-0.245949	1.09204	-0.564078	-0.132036
-4.43082	1.26344	-0.71892	-0.328336	-0.340202	-0.418599	0.603244	-0.766642	-0.285158	0.265207	0.660862	0.0346533	-0.325767	-0.225539	-0.364856	0.172058	-0.331439	-0.328781	-0.183882	-0.187804	0.325492	0.276298	0.11636	-0.0835912	-0.507634	-0.193215	0.0743364	-0.126599	-0.256802	-0.610987	-0.699758	-0.264323	0.00203895	0.194017	-0.980302	-0.112107	-0.429688	0.732924	-0.274465	0.0287925	-0.231958	-0.784251	-0.539298	-0.449797	-0.122954	-0.27137	-0.247158	1.0949	-0.564527	-0.132838
-4.42984	1.26278	-0.719021	-0.331091	-0.340755	-0.417785	0.60284	-0.769348	-0.285237	0.26358	0.659196	0.0323686	-0.326064	-0.226894	-0.363593	0.17274	-0.330643	-0.330164	-0.184142	-0.185946	0.327568	0.277757	0.114737	-0.0821219	-0.508006	-0.194411	0.0763249	-0.128519	-0.254473	-0.61017	-0.700876	-0.266902	0.00198712	0.191815	-0.980331	-0.112179	-0.428638	0.73016	-0.274981	0.0297328	-0.229207	-0.784595	-0.537741	-0.449062	-0.12261	-0.271808	-0.248375	1.09771	-0.564981	-0.133641
-4.42885	1.26214	-0.719107	-0.333849	-0.341305	-0.416974	0.602437	-0.772032	-0.285338	0.261952	0.657545	0.0300793	-0.326345	-0.228211	-0.362313	0.173428	-0.329837	-0.331545	-0.184406	-0.184102	0.329641	0.279231	0.113107	-0.0806636	-0.508359	-0.195613	0.0783028	-0.130455	-0.252141	-0.609357	-0.701984	-0.269486	0.00194695	0.189613	-0.980349	-0.112255	-0.427604	0.727402	-0.275489	0.0306864	-0.226455	-0.784924	-0.536168	-0.448325	-0.122265	-0.272238	-0.249599	1.10049	-0.565439	-0.134445
-4.42787	1.26152	-0.719177	-0.336611	-0.341852	-0.416166	0.602036	-0.774693	-0.285459	0.260323	0.655908	0.0277855	-0.326609	-0.229492	-0.361015	0.174121	-0.329023	-0.332923	-0.184675	-0.182273	0.331712	0.280719	0.111469	-0.0792161	-0.508692	-0.196818	0.08027	-0.132407	-0.249805	-0.608547	-0.703084	-0.272072	0.00191864	0.187412	-0.980357	-0.112334	-0.426587	0.72465	-0.275988	0.0316532	-0.223702	-0.785238	-0.534581	-0.447586	-0.12192	-0.27266	-0.25083	1.10323	-0.565901	-0.13525
-4.42689	1.26093	-0.719231	-0.339375	-0.342397	-0.41536	0.601637	-0.777333	-0.285601	0.258692	0.654285	0.0254874	-0.326857	-0.230735	-0.3597	0.174821	-0.3282	-0.334298	-0.184948	-0.180458	0.333779	0.282223	0.109825	-0.0777796	-0.509007	-0.198029	0.0822264	-0.134375	-0.247465	-0.607741	-0.704175	-0.274663	0.00190239	0.185211	-0.980354	-0.112417	-0.425587	0.721905	-0.276478	0.0326333	-0.220947	-0.785537	-0.532978	-0.446845	-0.121574	-0.273073	-0.252068	1.10592	-0.566368	-0.136055
-4.4259	1.26035	-0.719269	-0.342141	-0.34294	-0.414557	0.60124	-0.779949	-0.285764	0.257061	0.652678	0.023185	-0.327089	-0.231942	-0.358368	0.175526	-0.327368	-0.335671	-0.185225	-0.178657	0.335843	0.283741	0.108173	-0.076354	-0.509302	-0.199243	0.0841718	-0.136358	-0.245122	-0.606939	-0.705257	-0.277256	0.0018984	0.18301	-0.98034	-0.112502	-0.424604	0.719165	-0.27696	0.0336266	-0.218193	-0.785819	-0.53136	-0.446101	-0.121228	-0.273478	-0.253314	1.10857	-0.56684	-0.136862
-4.42492	1.25979	-0.719291	-0.344911	-0.34348	-0.413757	0.600844	-0.782543	-0.285948	0.255429	0.651085	0.0208784	-0.327304	-0.233111	-0.357018	0.176238	-0.326527	-0.33704	-0.185506	-0.176872	0.337904	0.285274	0.106515	-0.0749396	-0.509577	-0.200462	0.0861062	-0.138356	-0.242776	-0.606141	-0.70633	-0.279853	0.00190686	0.180809	-0.980317	-0.112591	-0.423637	0.716432	-0.277433	0.0346331	-0.215437	-0.786086	-0.529727	-0.445356	-0.120882	-0.273875	-0.254567	1.11119	-0.567317	-0.13767
-4.42394	1.25925	-0.719296	-0.347682	-0.344017	-0.412958	0.600451	-0.785113	-0.286153	0.253796	0.649508	0.0185679	-0.327503	-0.234244	-0.35565	0.176956	-0.325677	-0.338407	-0.185792	-0.175103	0.339962	0.286822	0.10485	-0.0735362	-0.509833	-0.201685	0.0880295	-0.140369	-0.240427	-0.605346	-0.707393	-0.282452	0.00192797	0.178608	-0.980283	-0.112683	-0.422687	0.713705	-0.277897	0.035653	-0.212682	-0.786338	-0.528079	-0.444609	-0.120536	-0.274264	-0.255827	1.11376	-0.567798	-0.138478
-4.42296	1.25873	-0.719285	-0.350456	-0.344552	-0.412163	0.600059	-0.787661	-0.286379	0.252163	0.647947	0.0162534	-0.327685	-0.23534	-0.354264	0.17768	-0.324819	-0.33977	-0.186081	-0.173349	0.342017	0.288385	0.103179	-0.072144	-0.51007	-0.202911	0.0899415	-0.142397	-0.238074	-0.604556	-0.708447	-0.285054	0.00196193	0.176407	-0.980238	-0.112778	-0.421754	0.710986	-0.278352	0.0366861	-0.209927	-0.786573	-0.526416	-0.44386	-0.120189	-0.274645	-0.257093	1.11629	-0.568284	-0.139287
-4.42197	1.25823	-0.719257	-0.353232	-0.345084	-0.411369	0.599668	-0.790185	-0.286626	0.250528	0.646401	0.0139352	-0.327851	-0.236398	-0.352861	0.178411	-0.323952	-0.341131	-0.186375	-0.17161	0.344068	0.289962	0.101501	-0.0707629	-0.510286	-0.204142	0.0918421	-0.144439	-0.235719	-0.603769	-0.709492	-0.287659	0.00200892	0.174207	-0.980184	-0.112876	-0.420838	0.708273	-0.278798	0.0377325	-0.207172	-0.786793	-0.524737	-0.44311	-0.119841	-0.275017	-0.258367	1.11878	-0.568774	-0.140097
-4.42099	1.25774	-0.719212	-0.356009	-0.345613	-0.410579	0.59928	-0.792685	-0.286895	0.248894	0.644872	0.0116133	-0.328	-0.23742	-0.35144	0.179149	-0.323076	-0.342487	-0.186673	-0.169888	0.346116	0.291554	0.0998167	-0.0693931	-0.510483	-0.205376	0.0937312	-0.146495	-0.233361	-0.602986	-0.710527	-0.290266	0.00206915	0.172006	-0.980119	-0.112976	-0.419938	0.705567	-0.279236	0.0387922	-0.204418	-0.786996	-0.523043	-0.442357	-0.119493	-0.275382	-0.259647	1.12123	-0.56927	-0.140908
-4.42001	1.25728	-0.71915	-0.358788	-0.34614	-0.40979	0.598894	-0.795161	-0.287185	0.247259	0.643359	0.00928795	-0.328134	-0.238406	-0.350001	0.179894	-0.322192	-0.34384	-0.186976	-0.168183	0.348161	0.29316	0.0981264	-0.0680345	-0.510661	-0.206614	0.0956088	-0.148565	-0.231	-0.602207	-0.711553	-0.292875	0.00214281	0.169806	-0.980044	-0.11308	-0.419056	0.702869	-0.279664	0.0398652	-0.201664	-0.787183	-0.521334	-0.441604	-0.119144	-0.275739	-0.260934	1.12364	-0.56977	-0.141719
-4.41902	1.25684	-0.719071	-0.361568	-0.346664	-0.409004	0.598509	-0.797614	-0.287496	0.245623	0.641863	0.00695915	-0.32825	-0.239354	-0.348543	0.180646	-0.321299	-0.345189	-0.187282	-0.166493	0.350202	0.294781	0.0964302	-0.0666873	-0.510818	-0.207856	0.0974746	-0.150649	-0.228637	-0.601432	-0.712569	-0.295486	0.00223009	0.167605	-0.979959	-0.113186	-0.41819	0.700178	-0.280084	0.0409514	-0.198912	-0.787354	-0.519609	-0.440849	-0.118794	-0.276088	-0.262228	1.12601	-0.570276	-0.14253
-4.41804	1.25641	-0.718975	-0.36435	-0.347186	-0.40822	0.598126	-0.800042	-0.287828	0.243987	0.640383	0.00462707	-0.328351	-0.240266	-0.347068	0.181404	-0.320398	-0.346535	-0.187592	-0.164821	0.35224	0.296416	0.0947282	-0.0653514	-0.510956	-0.209101	0.0993287	-0.152746	-0.226271	-0.600662	-0.713576	-0.298099	0.00233119	0.165405	-0.979863	-0.113295	-0.417341	0.697494	-0.280494	0.0420509	-0.196161	-0.787508	-0.51787	-0.440093	-0.118444	-0.27643	-0.263528	1.12834	-0.570786	-0.143342
-4.41706	1.256	-0.718861	-0.367132	-0.347705	-0.407439	0.597745	-0.802446	-0.288182	0.242351	0.638921	0.00229185	-0.328435	-0.241141	-0.345575	0.18217	-0.319488	-0.347876	-0.187907	-0.163166	0.354274	0.298065	0.0930204	-0.0640269	-0.511073	-0.210349	0.101171	-0.154856	-0.223904	-0.599895	-0.714573	-0.300713	0.0024463	0.163205	-0.979758	-0.113406	-0.416509	0.694819	-0.280895	0.0431636	-0.193411	-0.787646	-0.516115	-0.439336	-0.118093	-0.276764	-0.264834	1.13062	-0.571302	-0.144155
-4.41607	1.25561	-0.718729	-0.369916	-0.348221	-0.40666	0.597366	-0.804825	-0.288557	0.240715	0.637476	-4.63941e-05	-0.328503	-0.241979	-0.344063	0.182944	-0.31857	-0.349213	-0.188226	-0.161529	0.356305	0.299729	0.0913071	-0.0627139	-0.511171	-0.211601	0.103001	-0.15698	-0.221534	-0.599133	-0.71556	-0.303329	0.00257561	0.161004	-0.979642	-0.11352	-0.415694	0.692151	-0.281287	0.0442895	-0.190664	-0.787768	-0.514344	-0.438578	-0.117741	-0.277091	-0.266146	1.13286	-0.571822	-0.144968
-4.41509	1.25524	-0.71858	-0.3727	-0.348735	-0.405883	0.596988	-0.807179	-0.288954	0.239079	0.636048	-0.00238753	-0.328554	-0.242781	-0.342534	0.183724	-0.317644	-0.350546	-0.188548	-0.159909	0.358332	0.301406	0.0895884	-0.0614123	-0.511248	-0.212855	0.104819	-0.159115	-0.219162	-0.598374	-0.716538	-0.305946	0.0027193	0.158803	-0.979516	-0.113636	-0.414896	0.689491	-0.28167	0.0454286	-0.187919	-0.787872	-0.512558	-0.437818	-0.117389	-0.27741	-0.267465	1.13507	-0.572348	-0.145781
-4.41411	1.25488	-0.718413	-0.375484	-0.349246	-0.405108	0.596613	-0.809508	-0.289372	0.237443	0.634639	-0.00473143	-0.32859	-0.243547	-0.340985	0.184513	-0.316709	-0.351874	-0.188875	-0.158307	0.360356	0.303098	0.0878643	-0.0601223	-0.511305	-0.214113	0.106625	-0.161263	-0.216788	-0.59762	-0.717505	-0.308564	0.00287758	0.156603	-0.979381	-0.113754	-0.414115	0.68684	-0.282044	0.0465808	-0.185176	-0.78796	-0.510757	-0.437058	-0.117035	-0.277721	-0.26879	1.13722	-0.572879	-0.146595
-4.41313	1.25455	-0.718227	-0.378269	-0.349754	-0.404336	0.596239	-0.811812	-0.289811	0.235807	0.633247	-0.00707796	-0.328609	-0.244276	-0.339419	0.185309	-0.315767	-0.353198	-0.189206	-0.156723	0.362375	0.304804	0.0861352	-0.0588439	-0.511342	-0.215373	0.108419	-0.163424	-0.214413	-0.59687	-0.718463	-0.311182	0.00305063	0.154402	-0.979235	-0.113875	-0.41335	0.684197	-0.282409	0.0477462	-0.182436	-0.788031	-0.508941	-0.436297	-0.11668	-0.278026	-0.270121	1.13934	-0.573415	-0.147409
-4.41214	1.25423	-0.718024	-0.381054	-0.35026	-0.403565	0.595868	-0.814091	-0.290272	0.234171	0.631874	-0.00942699	-0.328612	-0.244969	-0.337834	0.186113	-0.314816	-0.354517	-0.189541	-0.155157	0.364391	0.306524	0.084401	-0.057577	-0.511359	-0.216637	0.1102	-0.165596	-0.212036	-0.596124	-0.719411	-0.313802	0.00323864	0.152201	-0.97908	-0.113998	-0.412603	0.681563	-0.282764	0.0489247	-0.179698	-0.788085	-0.507109	-0.435536	-0.116325	-0.278323	-0.271458	1.14142	-0.573956	-0.148223
-4.41116	1.25393	-0.717802	-0.383839	-0.350762	-0.402797	0.595498	-0.816344	-0.290754	0.232536	0.630519	-0.0117784	-0.3286	-0.245626	-0.336231	0.186925	-0.313857	-0.355831	-0.189879	-0.15361	0.366403	0.308258	0.082662	-0.0563218	-0.511355	-0.217903	0.111969	-0.167779	-0.209658	-0.595383	-0.720348	-0.316422	0.0034418	0.149999	-0.978915	-0.114122	-0.411872	0.678937	-0.28311	0.0501162	-0.176964	-0.788122	-0.505262	-0.434774	-0.115968	-0.278613	-0.2728	1.14345	-0.574502	-0.149038
-4.41018	1.25364	-0.717562	-0.386623	-0.351262	-0.402031	0.59513	-0.818571	-0.291258	0.230901	0.629183	-0.014132	-0.328571	-0.246247	-0.334609	0.187744	-0.31289	-0.35714	-0.190222	-0.152082	0.368412	0.310005	0.0809182	-0.0550784	-0.511331	-0.219171	0.113725	-0.169974	-0.207279	-0.594646	-0.721276	-0.319042	0.00366029	0.147798	-0.97874	-0.114249	-0.411158	0.67632	-0.283447	0.0513208	-0.174233	-0.788141	-0.503399	-0.434012	-0.11561	-0.278897	-0.274148	1.14544	-0.575054	-0.149852
-4.40919	1.25337	-0.717303	-0.389408	-0.35176	-0.401267	0.594764	-0.820772	-0.291783	0.229266	0.627866	-0.0164878	-0.328526	-0.246832	-0.332969	0.188572	-0.311915	-0.358443	-0.190569	-0.150573	0.370416	0.311766	0.0791699	-0.0538466	-0.511287	-0.220442	0.115469	-0.17218	-0.204898	-0.593913	-0.722194	-0.321662	0.00389431	0.145596	-0.978555	-0.114378	-0.410461	0.673713	-0.283774	0.0525383	-0.171506	-0.788144	-0.501521	-0.433249	-0.11525	-0.279173	-0.275502	1.14739	-0.575611	-0.150667
-4.40821	1.25312	-0.717025	-0.392191	-0.352255	-0.400505	0.5944	-0.822947	-0.29233	0.227632	0.626568	-0.0188455	-0.328465	-0.24738	-0.33131	0.189409	-0.310932	-0.359742	-0.19092	-0.149083	0.372416	0.313541	0.0774171	-0.0526267	-0.511222	-0.221716	0.1172	-0.174397	-0.202517	-0.593184	-0.723101	-0.324282	0.00414403	0.143394	-0.978361	-0.114509	-0.409781	0.671114	-0.284092	0.0537688	-0.168783	-0.788129	-0.499627	-0.432486	-0.11489	-0.279442	-0.276862	1.1493	-0.576173	-0.151481
-4.40723	1.25289	-0.716729	-0.394974	-0.352746	-0.399745	0.594038	-0.825096	-0.292898	0.225999	0.62529	-0.021205	-0.328388	-0.247894	-0.329632	0.190253	-0.309942	-0.361034	-0.191275	-0.147613	0.374413	0.315329	0.0756599	-0.0514186	-0.511137	-0.222992	0.118918	-0.176624	-0.200134	-0.59246	-0.723998	-0.326902	0.00440964	0.141192	-0.978157	-0.114641	-0.409118	0.668525	-0.2844	0.0550121	-0.166064	-0.788097	-0.497719	-0.431723	-0.114528	-0.279705	-0.278226	1.15116	-0.576741	-0.152296
-4.40624	1.25267	-0.716413	-0.397756	-0.353236	-0.398986	0.593678	-0.827218	-0.293488	0.224367	0.624032	-0.0235662	-0.328296	-0.248371	-0.327936	0.191106	-0.308943	-0.362322	-0.191633	-0.146162	0.376405	0.31713	0.0738986	-0.0502223	-0.511032	-0.22427	0.120624	-0.178862	-0.197751	-0.59174	-0.724885	-0.329522	0.00469132	0.138989	-0.977943	-0.114775	-0.408471	0.665946	-0.284699	0.0562683	-0.16335	-0.788047	-0.495794	-0.430959	-0.114165	-0.27996	-0.279596	1.15298	-0.577314	-0.153111
-4.40526	1.25247	-0.716078	-0.400537	-0.353722	-0.39823	0.593319	-0.829314	-0.294099	0.222735	0.622793	-0.025929	-0.328187	-0.248813	-0.326221	0.191968	-0.307937	-0.363603	-0.191996	-0.144732	0.378393	0.318945	0.0721333	-0.0490379	-0.510905	-0.22555	0.122316	-0.181109	-0.195367	-0.591025	-0.725762	-0.33214	0.00498926	0.136786	-0.97772	-0.114911	-0.407841	0.663376	-0.284988	0.0575372	-0.16064	-0.78798	-0.493855	-0.430196	-0.1138	-0.28021	-0.280971	1.15476	-0.577893	-0.153925
-4.40428	1.25228	-0.715724	-0.403316	-0.354206	-0.397475	0.592963	-0.831383	-0.294732	0.221104	0.621574	-0.0282931	-0.328063	-0.249219	-0.324487	0.192838	-0.306924	-0.364878	-0.192362	-0.143322	0.380377	0.320772	0.070364	-0.0478655	-0.510758	-0.226832	0.123995	-0.183367	-0.192983	-0.590314	-0.726628	-0.334758	0.00530364	0.134583	-0.977488	-0.115048	-0.407228	0.660816	-0.285268	0.0588189	-0.157936	-0.787895	-0.491899	-0.429433	-0.113434	-0.280452	-0.282351	1.1565	-0.578477	-0.154739
-4.40329	1.25211	-0.715351	-0.406094	-0.354686	-0.396723	0.592609	-0.833424	-0.295386	0.219474	0.620376	-0.0306586	-0.327924	-0.24959	-0.322735	0.193717	-0.305902	-0.366148	-0.192733	-0.141932	0.382357	0.322613	0.068591	-0.0467051	-0.510591	-0.228116	0.125661	-0.185633	-0.190598	-0.589607	-0.727484	-0.337375	0.00563463	0.132379	-0.977246	-0.115187	-0.406631	0.658266	-0.285538	0.0601132	-0.155236	-0.787793	-0.489929	-0.42867	-0.113066	-0.280689	-0.283736	1.1582	-0.579066	-0.155554
-4.40231	1.25196	-0.714958	-0.40887	-0.355164	-0.395972	0.592257	-0.835439	-0.296061	0.217845	0.619198	-0.0330252	-0.327768	-0.249926	-0.320963	0.194604	-0.304873	-0.367411	-0.193107	-0.140563	0.384332	0.324467	0.0668144	-0.0455567	-0.510403	-0.229402	0.127314	-0.187909	-0.188213	-0.588904	-0.728329	-0.33999	0.00598242	0.130175	-0.976995	-0.115327	-0.406052	0.655726	-0.285799	0.0614201	-0.152543	-0.787672	-0.487943	-0.427908	-0.112696	-0.280918	-0.285126	1.15985	-0.579661	-0.156367
-4.40133	1.25182	-0.714545	-0.411645	-0.35564	-0.395222	0.591907	-0.837425	-0.296758	0.216218	0.618042	-0.0353928	-0.327598	-0.250227	-0.319173	0.195501	-0.303837	-0.368668	-0.193485	-0.139214	0.386303	0.326334	0.0650342	-0.0444204	-0.510194	-0.23069	0.128954	-0.190194	-0.185829	-0.588206	-0.729164	-0.342605	0.00634718	0.127971	-0.976734	-0.115468	-0.405488	0.653197	-0.28605	0.0627395	-0.149855	-0.787534	-0.485941	-0.427146	-0.112325	-0.281142	-0.286521	1.16146	-0.580261	-0.157181
-4.40035	1.25169	-0.714113	-0.414417	-0.356112	-0.394475	0.591559	-0.839385	-0.297476	0.214592	0.616906	-0.0377612	-0.327411	-0.250493	-0.317364	0.196407	-0.302794	-0.369918	-0.193867	-0.137887	0.38827	0.328213	0.0632508	-0.0432961	-0.509964	-0.231979	0.13058	-0.192488	-0.183444	-0.587513	-0.729989	-0.345217	0.0067291	0.125766	-0.976465	-0.11561	-0.404942	0.650678	-0.286291	0.0640714	-0.147173	-0.787378	-0.483924	-0.426385	-0.111952	-0.281359	-0.28792	1.16303	-0.580867	-0.157994
-4.39936	1.25158	-0.71366	-0.417188	-0.356582	-0.393729	0.591213	-0.841316	-0.298216	0.212967	0.615791	-0.0401304	-0.32721	-0.250724	-0.315536	0.197321	-0.301743	-0.371161	-0.194253	-0.136581	0.390232	0.330105	0.061464	-0.0421841	-0.509714	-0.23327	0.132193	-0.19479	-0.181059	-0.586824	-0.730803	-0.347828	0.00712834	0.123561	-0.976186	-0.115754	-0.404412	0.64817	-0.286522	0.0654156	-0.144497	-0.787204	-0.481892	-0.425624	-0.111577	-0.281571	-0.289324	1.16455	-0.581479	-0.158807
-4.39838	1.25149	-0.713188	-0.419956	-0.357048	-0.392984	0.590869	-0.84322	-0.298977	0.211343	0.614698	-0.0425001	-0.326993	-0.250921	-0.313689	0.198245	-0.300684	-0.372398	-0.194642	-0.135296	0.39219	0.332009	0.0596742	-0.0410842	-0.509443	-0.234562	0.133792	-0.1971	-0.178675	-0.586139	-0.731607	-0.350437	0.00754507	0.121355	-0.975898	-0.115898	-0.403898	0.645673	-0.286744	0.0667721	-0.141828	-0.787012	-0.479844	-0.424865	-0.1112	-0.281776	-0.290732	1.16603	-0.582095	-0.159619
-4.3974	1.25141	-0.712695	-0.422721	-0.357512	-0.392241	0.590527	-0.845096	-0.299759	0.209721	0.613626	-0.0448702	-0.326761	-0.251083	-0.311824	0.199178	-0.299619	-0.373628	-0.195036	-0.134033	0.394143	0.333926	0.0578815	-0.0399965	-0.509151	-0.235855	0.135378	-0.199418	-0.176291	-0.585458	-0.732399	-0.353044	0.00797949	0.119148	-0.975601	-0.116044	-0.403401	0.643186	-0.286956	0.0681408	-0.139166	-0.786801	-0.477781	-0.424106	-0.110821	-0.281975	-0.292144	1.16747	-0.582718	-0.160431
-4.39641	1.25134	-0.712182	-0.425484	-0.357974	-0.3915	0.590187	-0.846943	-0.300562	0.208101	0.612576	-0.0472406	-0.326513	-0.25121	-0.309939	0.20012	-0.298546	-0.37485	-0.195433	-0.132792	0.396092	0.335855	0.0560859	-0.0389211	-0.508839	-0.23715	0.13695	-0.201743	-0.173908	-0.584782	-0.733182	-0.355648	0.00843174	0.116941	-0.975295	-0.11619	-0.402921	0.640711	-0.287158	0.0695216	-0.136511	-0.786573	-0.475703	-0.423348	-0.11044	-0.282169	-0.293561	1.16887	-0.583346	-0.161242
-4.39543	1.25129	-0.711649	-0.428244	-0.358432	-0.390759	0.589849	-0.848762	-0.301386	0.206482	0.611549	-0.0496112	-0.326251	-0.251304	-0.308035	0.201072	-0.297467	-0.376066	-0.195834	-0.131573	0.398036	0.337796	0.0542877	-0.037858	-0.508505	-0.238446	0.138509	-0.204076	-0.171526	-0.584111	-0.733953	-0.35825	0.00890201	0.114734	-0.974981	-0.116337	-0.402457	0.638247	-0.28735	0.0709145	-0.133863	-0.786326	-0.473609	-0.422591	-0.110057	-0.282356	-0.294981	1.17023	-0.583979	-0.162053
-4.39445	1.25126	-0.711095	-0.431001	-0.358887	-0.390021	0.589514	-0.850552	-0.302232	0.204865	0.610543	-0.0519817	-0.325974	-0.251363	-0.306113	0.202033	-0.29638	-0.377274	-0.196239	-0.130377	0.399975	0.339749	0.0524869	-0.0368072	-0.508151	-0.239743	0.140054	-0.206416	-0.169144	-0.583443	-0.734714	-0.360849	0.00939046	0.112526	-0.974657	-0.116485	-0.402009	0.635795	-0.287533	0.0723193	-0.131223	-0.786061	-0.471499	-0.421835	-0.109672	-0.282538	-0.296406	1.17154	-0.584619	-0.162863
-4.39346	1.25123	-0.71052	-0.433755	-0.35934	-0.389283	0.589181	-0.852314	-0.303099	0.20325	0.60956	-0.0543521	-0.325681	-0.251389	-0.304171	0.203004	-0.295286	-0.378474	-0.196648	-0.129202	0.401909	0.341714	0.0506837	-0.0357689	-0.507776	-0.241041	0.141585	-0.208763	-0.166764	-0.58278	-0.735465	-0.363446	0.00989726	0.110317	-0.974325	-0.116634	-0.401577	0.633354	-0.287705	0.0737359	-0.12859	-0.785778	-0.469374	-0.421081	-0.109284	-0.282714	-0.297834	1.17281	-0.585263	-0.163672
-4.39248	1.25122	-0.709925	-0.436505	-0.35979	-0.388547	0.58885	-0.854046	-0.303986	0.201637	0.6086	-0.0567221	-0.325374	-0.251381	-0.30221	0.203985	-0.294186	-0.379667	-0.19706	-0.128051	0.403839	0.343691	0.0488782	-0.0347429	-0.50738	-0.24234	0.143102	-0.211116	-0.164384	-0.582122	-0.736204	-0.366039	0.0104226	0.108108	-0.973985	-0.116783	-0.401162	0.630925	-0.287868	0.0751643	-0.125966	-0.785476	-0.467234	-0.420328	-0.108894	-0.282885	-0.299266	1.17404	-0.585913	-0.164481
-4.3915	1.25123	-0.709309	-0.439252	-0.360237	-0.387812	0.588521	-0.85575	-0.304895	0.200027	0.607663	-0.0590917	-0.325052	-0.25134	-0.300231	0.204975	-0.293078	-0.380851	-0.197476	-0.126922	0.405763	0.345679	0.0470705	-0.0337294	-0.506963	-0.24364	0.144605	-0.213475	-0.162006	-0.581467	-0.736933	-0.368629	0.0109666	0.105898	-0.973635	-0.116932	-0.400763	0.628507	-0.28802	0.0766044	-0.12335	-0.785156	-0.465079	-0.419577	-0.108502	-0.28305	-0.300701	1.17522	-0.586569	-0.165288
-4.39052	1.25124	-0.708672	-0.441995	-0.360681	-0.387078	0.588194	-0.857424	-0.305824	0.198418	0.606748	-0.0614607	-0.324716	-0.251265	-0.298232	0.205974	-0.291964	-0.382028	-0.197896	-0.125816	0.407683	0.347679	0.0452609	-0.0327283	-0.506525	-0.244941	0.146094	-0.21584	-0.159629	-0.580817	-0.737651	-0.371216	0.0115294	0.103688	-0.973278	-0.117082	-0.40038	0.626102	-0.288163	0.078056	-0.120743	-0.784817	-0.462908	-0.418827	-0.108107	-0.28321	-0.30214	1.17636	-0.587231	-0.166095
-4.38953	1.25127	-0.708013	-0.444735	-0.361122	-0.386345	0.587869	-0.859069	-0.306775	0.196811	0.605857	-0.063829	-0.324365	-0.251157	-0.296214	0.206984	-0.290843	-0.383197	-0.198319	-0.124733	0.409598	0.34969	0.0434494	-0.0317398	-0.506066	-0.246242	0.147569	-0.218211	-0.157254	-0.580172	-0.738358	-0.373799	0.0121112	0.101477	-0.972911	-0.117232	-0.400013	0.623709	-0.288295	0.079519	-0.118145	-0.78446	-0.460721	-0.418079	-0.10771	-0.283365	-0.303582	1.17746	-0.587898	-0.166901
-4.38855	1.25132	-0.707334	-0.44747	-0.361561	-0.385613	0.587547	-0.860684	-0.307746	0.195207	0.60499	-0.0661963	-0.323999	-0.251016	-0.294178	0.208004	-0.289716	-0.384357	-0.198747	-0.123673	0.411507	0.351712	0.0416361	-0.0307639	-0.505587	-0.247543	0.14903	-0.220588	-0.154881	-0.57953	-0.739055	-0.376379	0.0127123	0.0992648	-0.972537	-0.117382	-0.399662	0.621328	-0.288417	0.0809933	-0.115556	-0.784084	-0.458519	-0.417333	-0.107309	-0.283515	-0.305027	1.17852	-0.58857	-0.167706
-4.38757	1.25137	-0.706633	-0.450201	-0.361996	-0.384882	0.587227	-0.86227	-0.308738	0.193605	0.604146	-0.0685626	-0.323619	-0.250843	-0.292122	0.209033	-0.288582	-0.385509	-0.199177	-0.122638	0.413412	0.353745	0.0398212	-0.0298006	-0.505086	-0.248846	0.150476	-0.222969	-0.152509	-0.578893	-0.73974	-0.378954	0.0133326	0.0970523	-0.972154	-0.117533	-0.399328	0.61896	-0.28853	0.0824789	-0.112977	-0.783689	-0.456302	-0.416588	-0.106907	-0.283659	-0.306475	1.17954	-0.589248	-0.16851
-4.38658	1.25144	-0.705911	-0.452928	-0.362429	-0.384152	0.58691	-0.863826	-0.309751	0.192006	0.603326	-0.0709277	-0.323225	-0.250637	-0.290047	0.210072	-0.287441	-0.386653	-0.199612	-0.121625	0.415311	0.355789	0.0380048	-0.0288499	-0.504565	-0.250148	0.151909	-0.225355	-0.150139	-0.57826	-0.740415	-0.381526	0.0139724	0.0948391	-0.971763	-0.117683	-0.399009	0.616604	-0.288632	0.0839755	-0.110407	-0.783276	-0.45407	-0.415846	-0.106501	-0.283798	-0.307927	1.18051	-0.589932	-0.169313
-4.3856	1.25152	-0.705167	-0.455651	-0.362859	-0.383423	0.586594	-0.865352	-0.310784	0.190409	0.60253	-0.0732914	-0.322817	-0.250398	-0.287954	0.211122	-0.286294	-0.387787	-0.20005	-0.120637	0.417205	0.357843	0.0361871	-0.0279119	-0.504023	-0.251451	0.153327	-0.227746	-0.147771	-0.577632	-0.741079	-0.384093	0.0146318	0.0926251	-0.971364	-0.117834	-0.398706	0.614262	-0.288724	0.0854831	-0.107847	-0.782844	-0.451822	-0.415106	-0.106092	-0.283933	-0.309381	1.18144	-0.590621	-0.170115
-4.38462	1.25161	-0.704402	-0.458368	-0.363286	-0.382695	0.586282	-0.866847	-0.311837	0.188815	0.601758	-0.0756537	-0.322394	-0.250128	-0.285841	0.212181	-0.285141	-0.388913	-0.200492	-0.119672	0.419094	0.359909	0.0343681	-0.0269865	-0.50346	-0.252755	0.154731	-0.230141	-0.145406	-0.577007	-0.741733	-0.386656	0.015311	0.0904105	-0.970957	-0.117984	-0.398418	0.611932	-0.288806	0.0870016	-0.105297	-0.782393	-0.449559	-0.414368	-0.105681	-0.284062	-0.310837	1.18233	-0.591315	-0.170916
-4.38363	1.25172	-0.703615	-0.461082	-0.36371	-0.381967	0.585971	-0.868313	-0.312911	0.187224	0.601011	-0.0780142	-0.321958	-0.249825	-0.283709	0.213251	-0.283981	-0.39003	-0.200938	-0.118732	0.420977	0.361984	0.032548	-0.026074	-0.502876	-0.254058	0.156121	-0.23254	-0.143043	-0.576387	-0.742375	-0.389214	0.0160102	0.088195	-0.970543	-0.118134	-0.398147	0.609615	-0.288878	0.0885307	-0.102758	-0.781924	-0.447281	-0.413633	-0.105266	-0.284187	-0.312296	1.18317	-0.592016	-0.171715
-4.38265	1.25183	-0.702806	-0.46379	-0.364131	-0.381241	0.585663	-0.869747	-0.314006	0.185636	0.600288	-0.080373	-0.321508	-0.249491	-0.281559	0.21433	-0.282815	-0.391138	-0.201387	-0.117816	0.422855	0.36407	0.030727	-0.0251742	-0.502271	-0.255361	0.157496	-0.234943	-0.140682	-0.575771	-0.743006	-0.391767	0.0167294	0.0859788	-0.97012	-0.118284	-0.397891	0.607311	-0.288939	0.0900705	-0.10023	-0.781435	-0.444987	-0.4129	-0.104849	-0.284307	-0.313758	1.18398	-0.592721	-0.172513
-4.38167	1.25196	-0.701975	-0.466493	-0.364549	-0.380514	0.585357	-0.871152	-0.31512	0.184051	0.59959	-0.0827298	-0.321044	-0.249125	-0.279389	0.21542	-0.281643	-0.392236	-0.20184	-0.116924	0.424728	0.366165	0.0289051	-0.0242872	-0.501645	-0.256665	0.158856	-0.23735	-0.138324	-0.575159	-0.743627	-0.394315	0.0174689	0.0837618	-0.969689	-0.118434	-0.39765	0.605021	-0.28899	0.0916208	-0.0977121	-0.780928	-0.442678	-0.412169	-0.104428	-0.284422	-0.315222	1.18474	-0.593433	-0.17331
-4.38068	1.2521	-0.701122	-0.46919	-0.364965	-0.379788	0.585053	-0.872525	-0.316255	0.182468	0.598917	-0.0850845	-0.320566	-0.248728	-0.277201	0.21652	-0.280465	-0.393325	-0.202296	-0.116057	0.426595	0.368271	0.0270825	-0.023413	-0.500998	-0.257968	0.160203	-0.239759	-0.135968	-0.574551	-0.744237	-0.396859	0.0182288	0.081544	-0.969251	-0.118583	-0.397425	0.602744	-0.289031	0.0931813	-0.0952058	-0.780402	-0.440354	-0.411442	-0.104004	-0.284533	-0.316688	1.18546	-0.594149	-0.174106
-4.3797	1.25225	-0.700247	-0.471883	-0.365377	-0.379063	0.584753	-0.873868	-0.31741	0.180889	0.598269	-0.0874369	-0.320075	-0.2483	-0.274993	0.217631	-0.279281	-0.394404	-0.202756	-0.115215	0.428456	0.370387	0.0252594	-0.0225518	-0.500331	-0.259271	0.161534	-0.242172	-0.133616	-0.573947	-0.744835	-0.399397	0.0190092	0.0793254	-0.968806	-0.118731	-0.397215	0.600481	-0.289062	0.0947521	-0.092711	-0.779856	-0.438015	-0.410716	-0.103577	-0.28464	-0.318155	1.18614	-0.594871	-0.1749
-4.37872	1.25241	-0.699349	-0.47457	-0.365787	-0.378338	0.584454	-0.87518	-0.318585	0.179313	0.597646	-0.0897868	-0.31957	-0.247841	-0.272767	0.218752	-0.278091	-0.395474	-0.20322	-0.114398	0.430312	0.372511	0.0234358	-0.0217035	-0.499643	-0.260574	0.162851	-0.244587	-0.131266	-0.573347	-0.745423	-0.401929	0.0198102	0.0771059	-0.968352	-0.118879	-0.397021	0.598232	-0.289082	0.0963329	-0.0902279	-0.779292	-0.43566	-0.409994	-0.103146	-0.284742	-0.319625	1.18678	-0.595599	-0.175693
-4.37774	1.25258	-0.69843	-0.477251	-0.366194	-0.377614	0.584158	-0.87646	-0.319779	0.177741	0.597049	-0.0921342	-0.319052	-0.247351	-0.270522	0.219883	-0.276894	-0.396534	-0.203687	-0.113605	0.432162	0.374646	0.0216118	-0.0208681	-0.498934	-0.261877	0.164154	-0.247005	-0.128919	-0.572751	-0.746001	-0.404456	0.020632	0.0748856	-0.967892	-0.119027	-0.396842	0.595997	-0.289093	0.0979236	-0.0877568	-0.778709	-0.43329	-0.409275	-0.102711	-0.284839	-0.321097	1.18737	-0.596332	-0.176484
-4.37675	1.25276	-0.697488	-0.479926	-0.366598	-0.37689	0.583865	-0.877709	-0.320993	0.176172	0.596477	-0.0944789	-0.318521	-0.246831	-0.268258	0.221024	-0.275693	-0.397584	-0.204158	-0.112838	0.434007	0.376789	0.0197877	-0.0200457	-0.498204	-0.26318	0.165442	-0.249424	-0.126576	-0.572159	-0.746567	-0.406977	0.0214748	0.0726645	-0.967424	-0.119173	-0.396678	0.593775	-0.289092	0.0995241	-0.0852979	-0.778107	-0.430905	-0.408559	-0.102273	-0.284933	-0.32257	1.18793	-0.59707	-0.177274
-4.37577	1.25295	-0.696523	-0.482595	-0.366999	-0.376166	0.583574	-0.878927	-0.322227	0.174606	0.595932	-0.0968207	-0.317977	-0.246281	-0.265975	0.222176	-0.274485	-0.398623	-0.204632	-0.112096	0.435845	0.378942	0.0179634	-0.0192363	-0.497454	-0.264482	0.166715	-0.251846	-0.124236	-0.571571	-0.747122	-0.409492	0.0223387	0.0704425	-0.966949	-0.119319	-0.396529	0.591568	-0.289082	0.101134	-0.0828515	-0.777486	-0.428505	-0.407846	-0.101832	-0.285022	-0.324044	1.18844	-0.597814	-0.178062
-4.37479	1.25316	-0.695536	-0.485259	-0.367398	-0.375442	0.583285	-0.880114	-0.323481	0.173044	0.595412	-0.0991594	-0.31742	-0.245701	-0.263673	0.223339	-0.273271	-0.399653	-0.20511	-0.111379	0.437677	0.381103	0.0161393	-0.0184399	-0.496682	-0.265783	0.167973	-0.254269	-0.1219	-0.570987	-0.747667	-0.412001	0.0232238	0.0682196	-0.966467	-0.119464	-0.396396	0.589375	-0.289061	0.102754	-0.0804178	-0.776846	-0.42609	-0.407137	-0.101386	-0.285108	-0.32552	1.18891	-0.598563	-0.178849
-4.3738	1.25337	-0.694527	-0.487915	-0.367794	-0.374718	0.582999	-0.881268	-0.324754	0.171486	0.594919	-0.101495	-0.31685	-0.245091	-0.261353	0.224511	-0.272052	-0.400672	-0.205591	-0.110688	0.439504	0.383273	0.0143153	-0.0176566	-0.49589	-0.267084	0.169217	-0.256693	-0.119567	-0.570407	-0.7482	-0.414504	0.0241302	0.0659958	-0.965977	-0.119607	-0.396277	0.587196	-0.289029	0.104383	-0.0779972	-0.776187	-0.42366	-0.40643	-0.100937	-0.285189	-0.326997	1.18934	-0.599317	-0.179633
-4.37282	1.25359	-0.693494	-0.490566	-0.368186	-0.373994	0.582716	-0.882391	-0.326046	0.169932	0.594451	-0.103827	-0.316267	-0.244452	-0.259014	0.225695	-0.270828	-0.40168	-0.206076	-0.110023	0.441324	0.385452	0.0124915	-0.0168865	-0.495078	-0.268384	0.170446	-0.259119	-0.117237	-0.56983	-0.748723	-0.417	0.0250582	0.0637712	-0.965481	-0.11975	-0.396173	0.585033	-0.288988	0.106021	-0.0755897	-0.775508	-0.421214	-0.405728	-0.100484	-0.285267	-0.328475	1.18973	-0.600077	-0.180417
-4.37184	1.25382	-0.692439	-0.49321	-0.368576	-0.373271	0.582435	-0.883482	-0.327357	0.168381	0.594011	-0.106156	-0.315672	-0.243784	-0.256656	0.226888	-0.269598	-0.402678	-0.206564	-0.109383	0.443139	0.387639	0.0106682	-0.0161295	-0.494245	-0.269684	0.17166	-0.261545	-0.114912	-0.569257	-0.749235	-0.41949	0.0260077	0.0615456	-0.964978	-0.119892	-0.396083	0.582883	-0.288935	0.107668	-0.0731957	-0.774811	-0.418754	-0.405028	-0.100027	-0.28534	-0.329953	1.19007	-0.600842	-0.181198
-4.37085	1.25406	-0.691361	-0.495847	-0.368963	-0.372547	0.582158	-0.884541	-0.328688	0.166835	0.593597	-0.108481	-0.315064	-0.243086	-0.25428	0.228093	-0.268362	-0.403665	-0.207056	-0.108769	0.444947	0.389834	0.00884549	-0.0153856	-0.493391	-0.270982	0.172859	-0.263972	-0.112591	-0.568688	-0.749736	-0.421973	0.0269789	0.0593191	-0.964469	-0.120032	-0.396008	0.580749	-0.288873	0.109323	-0.0708154	-0.774094	-0.416279	-0.404333	-0.0995659	-0.28541	-0.331433	1.19038	-0.601612	-0.181977
-4.36987	1.25431	-0.690259	-0.498477	-0.369348	-0.371823	0.581882	-0.885567	-0.330037	0.165292	0.593209	-0.110802	-0.314444	-0.24236	-0.251885	0.229307	-0.267121	-0.404641	-0.207551	-0.108181	0.446749	0.392037	0.0070234	-0.014655	-0.492516	-0.27228	0.174043	-0.266399	-0.110274	-0.568123	-0.750226	-0.424449	0.027972	0.0570916	-0.963952	-0.120171	-0.395948	0.578629	-0.2888	0.110988	-0.0684491	-0.773359	-0.413788	-0.403642	-0.0991005	-0.285477	-0.332913	1.19064	-0.602387	-0.182755
-4.36889	1.25457	-0.689135	-0.501101	-0.369729	-0.371099	0.58161	-0.886562	-0.331405	0.163754	0.592849	-0.113119	-0.313812	-0.241606	-0.249471	0.230532	-0.265875	-0.405606	-0.20805	-0.107619	0.448545	0.394248	0.00520209	-0.0139376	-0.491622	-0.273577	0.175213	-0.268825	-0.107961	-0.567561	-0.750706	-0.426918	0.0289871	0.0548632	-0.963429	-0.120309	-0.395902	0.576525	-0.288716	0.112661	-0.066097	-0.772604	-0.411283	-0.402954	-0.098631	-0.285539	-0.334393	1.19087	-0.603167	-0.183531
-4.36791	1.25483	-0.687988	-0.503717	-0.370108	-0.370374	0.58134	-0.887524	-0.332792	0.16222	0.592516	-0.115432	-0.313167	-0.240824	-0.247039	0.231768	-0.264624	-0.406559	-0.208552	-0.107083	0.450334	0.396466	0.00338169	-0.0132335	-0.490706	-0.274873	0.176367	-0.271252	-0.105652	-0.567003	-0.751174	-0.42938	0.0300243	0.0526339	-0.9629	-0.120445	-0.395871	0.574436	-0.288622	0.114342	-0.0637593	-0.77183	-0.408763	-0.40227	-0.0981571	-0.285599	-0.335874	1.19105	-0.603953	-0.184305
-4.36692	1.25511	-0.686817	-0.506326	-0.370484	-0.369649	0.581073	-0.888453	-0.334197	0.16069	0.59221	-0.117741	-0.312511	-0.240013	-0.244589	0.233014	-0.263367	-0.407502	-0.209058	-0.106574	0.452117	0.398691	0.00156231	-0.0125426	-0.48977	-0.276168	0.177507	-0.273678	-0.103348	-0.566448	-0.751632	-0.431834	0.0310837	0.0504036	-0.962364	-0.12058	-0.395853	0.572362	-0.288517	0.116032	-0.0614362	-0.771037	-0.406227	-0.401591	-0.0976788	-0.285654	-0.337355	1.1912	-0.604743	-0.185077
-4.36594	1.25539	-0.685623	-0.508927	-0.370857	-0.368924	0.580808	-0.88935	-0.335621	0.159165	0.591931	-0.120045	-0.311843	-0.239175	-0.24212	0.234271	-0.262105	-0.408432	-0.209567	-0.10609	0.453894	0.400924	-0.000255933	-0.0118651	-0.488814	-0.277462	0.178632	-0.276103	-0.101049	-0.565896	-0.75208	-0.434281	0.0321654	0.0481724	-0.961822	-0.120713	-0.39585	0.570303	-0.288402	0.117729	-0.0591281	-0.770225	-0.403677	-0.400915	-0.097196	-0.285707	-0.338836	1.1913	-0.605539	-0.185846
-4.36496	1.25568	-0.684406	-0.511521	-0.371228	-0.368198	0.580546	-0.890214	-0.337063	0.157645	0.59168	-0.122345	-0.311163	-0.23831	-0.239632	0.235539	-0.260839	-0.409352	-0.21008	-0.105634	0.455663	0.403164	-0.00207291	-0.0112009	-0.487838	-0.278755	0.179741	-0.278527	-0.0987538	-0.565349	-0.752516	-0.43672	0.0332696	0.0459402	-0.961274	-0.120844	-0.395861	0.56826	-0.288276	0.119434	-0.0568352	-0.769394	-0.401113	-0.400244	-0.0967087	-0.285756	-0.340317	1.19136	-0.606339	-0.186614
-4.36397	1.25598	-0.683165	-0.514108	-0.371595	-0.367471	0.580288	-0.891045	-0.338523	0.156129	0.591457	-0.12464	-0.310471	-0.237418	-0.237127	0.236816	-0.259567	-0.410259	-0.210596	-0.105203	0.457427	0.40541	-0.00388851	-0.0105502	-0.486841	-0.280047	0.180836	-0.28095	-0.096464	-0.564804	-0.752942	-0.439151	0.0343963	0.043707	-0.96072	-0.120973	-0.395886	0.566233	-0.28814	0.121147	-0.0545576	-0.768543	-0.398533	-0.399578	-0.0962167	-0.285802	-0.341798	1.19139	-0.607144	-0.18738
-4.36299	1.25628	-0.681901	-0.516686	-0.37196	-0.366744	0.580032	-0.891844	-0.340001	0.154618	0.591262	-0.12693	-0.309768	-0.236499	-0.234603	0.238105	-0.25829	-0.411154	-0.211115	-0.1048	0.459183	0.407663	-0.00570261	-0.00991278	-0.485824	-0.281337	0.181916	-0.283371	-0.0941791	-0.564263	-0.753357	-0.441575	0.0355457	0.0414728	-0.96016	-0.121101	-0.395924	0.564221	-0.287993	0.122867	-0.0522956	-0.767674	-0.395939	-0.398916	-0.09572	-0.285845	-0.343278	1.19137	-0.607955	-0.188143
-4.36201	1.2566	-0.680614	-0.519257	-0.372323	-0.366017	0.579779	-0.892609	-0.341496	0.153111	0.591094	-0.129215	-0.309054	-0.235553	-0.232061	0.239404	-0.257009	-0.412038	-0.211638	-0.104423	0.460933	0.409923	-0.0075151	-0.00928884	-0.484786	-0.282626	0.182981	-0.28579	-0.0918993	-0.563725	-0.753761	-0.44399	0.0367178	0.0392376	-0.959594	-0.121227	-0.395977	0.562226	-0.287836	0.124595	-0.0500495	-0.766785	-0.393329	-0.398259	-0.0952184	-0.285884	-0.344757	1.19131	-0.60877	-0.188905
-4.36102	1.25692	-0.679302	-0.521819	-0.372682	-0.365288	0.579528	-0.893341	-0.34301	0.15161	0.590955	-0.131495	-0.308329	-0.234581	-0.229501	0.240713	-0.255723	-0.412909	-0.212164	-0.104072	0.462676	0.412188	-0.00932586	-0.00867836	-0.483729	-0.283913	0.18403	-0.288207	-0.0896248	-0.56319	-0.754155	-0.446397	0.0379128	0.0370014	-0.959023	-0.121351	-0.396042	0.560246	-0.287668	0.126329	-0.0478194	-0.765878	-0.390706	-0.397606	-0.094712	-0.285921	-0.346236	1.19122	-0.60959	-0.189664
-4.36004	1.25724	-0.677968	-0.524374	-0.373039	-0.364558	0.579281	-0.894039	-0.344541	0.150114	0.590844	-0.133769	-0.307593	-0.233583	-0.226923	0.242033	-0.254432	-0.413768	-0.212693	-0.103749	0.464412	0.414459	-0.0111348	-0.00808138	-0.482651	-0.2852	0.185065	-0.290621	-0.0873556	-0.562658	-0.754538	-0.448795	0.0391308	0.0347643	-0.958445	-0.121473	-0.396122	0.558283	-0.287489	0.128071	-0.0456057	-0.764951	-0.388067	-0.396958	-0.0942006	-0.285955	-0.347714	1.19108	-0.610414	-0.19042
-4.35906	1.25758	-0.676609	-0.52692	-0.373393	-0.363828	0.579037	-0.894705	-0.346089	0.148622	0.590761	-0.136038	-0.306845	-0.23256	-0.224327	0.243363	-0.253137	-0.414614	-0.213226	-0.103452	0.466141	0.416737	-0.0129417	-0.00749791	-0.481554	-0.286484	0.186085	-0.293033	-0.0850919	-0.562129	-0.754911	-0.451185	0.0403718	0.0325261	-0.957863	-0.121592	-0.396214	0.556335	-0.2873	0.129819	-0.0434085	-0.764005	-0.385414	-0.396315	-0.0936841	-0.285986	-0.349191	1.19091	-0.611244	-0.191175
-4.35807	1.25792	-0.675227	-0.529458	-0.373745	-0.363097	0.578795	-0.895337	-0.347655	0.147136	0.590707	-0.138301	-0.306088	-0.231511	-0.221713	0.244703	-0.251837	-0.415448	-0.213762	-0.103183	0.467863	0.419019	-0.0147466	-0.00692798	-0.480436	-0.287767	0.187089	-0.295442	-0.0828337	-0.561604	-0.755273	-0.453566	0.0416361	0.0302869	-0.957274	-0.12171	-0.39632	0.554404	-0.287101	0.131573	-0.041228	-0.76304	-0.382747	-0.395678	-0.0931624	-0.286014	-0.350666	1.19069	-0.612077	-0.191927
-4.35709	1.25827	-0.67382	-0.531987	-0.374094	-0.362364	0.578557	-0.895935	-0.349237	0.145656	0.590682	-0.140558	-0.305319	-0.230437	-0.219081	0.246054	-0.250532	-0.41627	-0.214302	-0.10294	0.469578	0.421307	-0.0165493	-0.00637162	-0.479299	-0.289049	0.188079	-0.297847	-0.0805813	-0.561081	-0.755624	-0.455939	0.0429235	0.0280467	-0.956681	-0.121825	-0.396439	0.55249	-0.28689	0.133334	-0.0390645	-0.762056	-0.380065	-0.395045	-0.0926355	-0.286039	-0.352141	1.19044	-0.612916	-0.192676
-4.35611	1.25862	-0.67239	-0.534507	-0.37444	-0.36163	0.578321	-0.896499	-0.350837	0.144181	0.590685	-0.142809	-0.30454	-0.229339	-0.216431	0.247416	-0.249223	-0.417078	-0.214845	-0.102724	0.471285	0.4236	-0.0183497	-0.00582885	-0.478142	-0.290329	0.189054	-0.300249	-0.0783348	-0.560561	-0.755965	-0.458302	0.0442343	0.0258055	-0.956082	-0.121938	-0.396572	0.550592	-0.286669	0.135101	-0.0369183	-0.761053	-0.377368	-0.394418	-0.0921033	-0.286062	-0.353614	1.19015	-0.613759	-0.193424
-4.35513	1.25898	-0.670936	-0.537019	-0.374784	-0.360895	0.578089	-0.89703	-0.352453	0.142711	0.590717	-0.145054	-0.303751	-0.228216	-0.213763	0.248788	-0.24791	-0.417874	-0.215391	-0.102536	0.472986	0.425898	-0.0201477	-0.0052997	-0.476965	-0.291607	0.190013	-0.302648	-0.0760942	-0.560044	-0.756296	-0.460657	0.0455686	0.0235632	-0.955478	-0.122048	-0.396717	0.54871	-0.286438	0.136874	-0.0347894	-0.760031	-0.374657	-0.393796	-0.0915657	-0.286082	-0.355085	1.18982	-0.614606	-0.194168
-4.35414	1.25934	-0.669458	-0.539521	-0.375125	-0.360159	0.577859	-0.897527	-0.354085	0.141247	0.590778	-0.147293	-0.302952	-0.227069	-0.211078	0.25017	-0.246592	-0.418657	-0.21594	-0.102374	0.474679	0.4282	-0.0219432	-0.00478419	-0.475768	-0.292883	0.190957	-0.305042	-0.0738596	-0.55953	-0.756616	-0.463002	0.0469264	0.02132	-0.954869	-0.122156	-0.396874	0.546845	-0.286195	0.138652	-0.0326782	-0.75899	-0.371932	-0.393179	-0.0910227	-0.2861	-0.356554	1.18945	-0.615458	-0.19491
-4.35316	1.25971	-0.667956	-0.542015	-0.375464	-0.359422	0.577633	-0.89799	-0.355734	0.139788	0.590868	-0.149525	-0.302142	-0.225898	-0.208376	0.251562	-0.245271	-0.419426	-0.216493	-0.10224	0.476364	0.430507	-0.0237361	-0.00428234	-0.474552	-0.294157	0.191887	-0.307433	-0.0716313	-0.559018	-0.756926	-0.465337	0.0483078	0.0190757	-0.954256	-0.122261	-0.397045	0.544998	-0.285943	0.140436	-0.0305849	-0.75793	-0.369192	-0.392568	-0.090474	-0.286115	-0.358021	1.18905	-0.616314	-0.19565
-4.35218	1.26009	-0.66643	-0.5445	-0.3758	-0.358683	0.577409	-0.898419	-0.357399	0.138336	0.590988	-0.151751	-0.301323	-0.224703	-0.205656	0.252964	-0.243945	-0.420182	-0.217049	-0.102133	0.478043	0.432818	-0.0255262	-0.00379418	-0.473316	-0.29543	0.192801	-0.309818	-0.0694093	-0.558509	-0.757226	-0.467664	0.0497128	0.0168304	-0.953637	-0.122364	-0.397228	0.543167	-0.285679	0.142226	-0.0285096	-0.756852	-0.366438	-0.391963	-0.0899197	-0.286128	-0.359487	1.1886	-0.617174	-0.196387
-4.35119	1.26047	-0.66488	-0.546975	-0.376133	-0.357942	0.577189	-0.898814	-0.35908	0.136889	0.591137	-0.153969	-0.300494	-0.223485	-0.202918	0.254377	-0.242615	-0.420925	-0.217608	-0.102053	0.479713	0.435133	-0.0273135	-0.00331974	-0.472061	-0.296701	0.1937	-0.312199	-0.0671936	-0.558002	-0.757515	-0.46998	0.0511417	0.0145841	-0.953014	-0.122464	-0.397423	0.541353	-0.285405	0.14402	-0.0264526	-0.755754	-0.363669	-0.391363	-0.0893597	-0.286139	-0.36095	1.18812	-0.618038	-0.197122
-4.35021	1.26086	-0.663306	-0.549441	-0.376464	-0.3572	0.576972	-0.899175	-0.360777	0.135448	0.591315	-0.156181	-0.299656	-0.222245	-0.200163	0.2558	-0.241281	-0.421654	-0.218171	-0.102001	0.481376	0.437452	-0.0290978	-0.00285902	-0.470786	-0.29797	0.194584	-0.314575	-0.0649846	-0.557498	-0.757794	-0.472287	0.0525944	0.0123367	-0.952386	-0.122561	-0.397631	0.539556	-0.28512	0.145819	-0.0244141	-0.754638	-0.360887	-0.390769	-0.0887939	-0.286147	-0.36241	1.1876	-0.618907	-0.197853
-4.34923	1.26125	-0.661707	-0.551897	-0.376792	-0.356456	0.576758	-0.899501	-0.362489	0.134013	0.591523	-0.158386	-0.298808	-0.220981	-0.197391	0.257233	-0.239943	-0.42237	-0.218736	-0.101976	0.483032	0.439775	-0.030879	-0.00241205	-0.469492	-0.299237	0.195453	-0.316946	-0.0627822	-0.556997	-0.758063	-0.474584	0.054071	0.0100883	-0.951754	-0.122655	-0.39785	0.537776	-0.284825	0.147623	-0.0223943	-0.753502	-0.35809	-0.390181	-0.0882222	-0.286153	-0.363868	1.18704	-0.61978	-0.198582
-4.34824	1.26164	-0.660085	-0.554344	-0.377118	-0.355711	0.576548	-0.899793	-0.364217	0.132585	0.591761	-0.160583	-0.29795	-0.219696	-0.194602	0.258676	-0.238601	-0.423071	-0.219305	-0.101978	0.484679	0.4421	-0.0326571	-0.00197886	-0.468178	-0.300501	0.196308	-0.319311	-0.0605866	-0.556497	-0.758321	-0.476871	0.0555716	0.00783894	-0.951118	-0.122747	-0.398082	0.536013	-0.284519	0.149431	-0.0203934	-0.752348	-0.35528	-0.3896	-0.0876445	-0.286157	-0.365323	1.18645	-0.620656	-0.199309
-4.34726	1.26204	-0.658438	-0.556781	-0.377442	-0.354964	0.57634	-0.900051	-0.36596	0.131163	0.592028	-0.162773	-0.297084	-0.218388	-0.191796	0.260129	-0.237255	-0.423759	-0.219877	-0.102007	0.486319	0.444429	-0.034432	-0.00155947	-0.466846	-0.301764	0.197147	-0.321671	-0.0583978	-0.556	-0.75857	-0.479147	0.0570962	0.00558852	-0.950477	-0.122835	-0.398326	0.534268	-0.284203	0.151243	-0.0184116	-0.751175	-0.352455	-0.389024	-0.0870608	-0.286159	-0.366775	1.18582	-0.621537	-0.200032
-4.34628	1.26245	-0.656766	-0.559208	-0.377763	-0.354215	0.576136	-0.900274	-0.367718	0.129747	0.592325	-0.164956	-0.296209	-0.217059	-0.188973	0.261592	-0.235906	-0.424433	-0.220453	-0.102064	0.48795	0.44676	-0.0362034	-0.00115389	-0.465494	-0.303024	0.197971	-0.324024	-0.0562161	-0.555505	-0.758808	-0.481414	0.058645	0.00333708	-0.949832	-0.122921	-0.398581	0.532541	-0.283875	0.153059	-0.0164492	-0.749984	-0.349616	-0.388455	-0.0864709	-0.286159	-0.368225	1.18515	-0.622421	-0.200753
-4.3453	1.26285	-0.655071	-0.561625	-0.378082	-0.353464	0.575935	-0.900463	-0.369492	0.128338	0.592653	-0.16713	-0.295325	-0.215708	-0.186133	0.263065	-0.234553	-0.425093	-0.221031	-0.102148	0.489574	0.449094	-0.0379714	-0.000762139	-0.464124	-0.304283	0.19878	-0.326372	-0.0540415	-0.555012	-0.759037	-0.48367	0.0602179	0.00108463	-0.949183	-0.123003	-0.398848	0.530831	-0.283538	0.154879	-0.0145063	-0.748773	-0.346764	-0.387892	-0.0858748	-0.286157	-0.369671	1.18445	-0.623309	-0.201471
-4.34431	1.26326	-0.653351	-0.564033	-0.378398	-0.35271	0.575737	-0.900617	-0.371279	0.126935	0.59301	-0.169297	-0.294432	-0.214337	-0.183277	0.264547	-0.233196	-0.425739	-0.221613	-0.10226	0.49119	0.451431	-0.0397358	-0.000384243	-0.462734	-0.305539	0.199573	-0.328713	-0.0518742	-0.554522	-0.759256	-0.485915	0.0618151	-0.00116883	-0.94853	-0.123082	-0.399127	0.529138	-0.283189	0.156703	-0.012583	-0.747545	-0.343897	-0.387335	-0.0852725	-0.286153	-0.371113	1.18371	-0.6242	-0.202186
-4.34333	1.26368	-0.651607	-0.56643	-0.378712	-0.351955	0.575543	-0.900737	-0.373081	0.125539	0.593398	-0.171456	-0.293531	-0.212945	-0.180403	0.26604	-0.231836	-0.42637	-0.222198	-0.102399	0.492797	0.453769	-0.0414965	-2.02176e-05	-0.461326	-0.306793	0.200352	-0.331047	-0.0497141	-0.554033	-0.759464	-0.48815	0.0634366	-0.00342331	-0.947874	-0.123158	-0.399417	0.527463	-0.28283	0.15853	-0.0106797	-0.746297	-0.341017	-0.386785	-0.0846637	-0.286147	-0.372552	1.18293	-0.625096	-0.202898
-4.34235	1.2641	-0.649838	-0.568817	-0.379024	-0.351198	0.575352	-0.900821	-0.374898	0.124149	0.593815	-0.173606	-0.292621	-0.211532	-0.177513	0.267542	-0.230472	-0.426987	-0.222786	-0.102565	0.494396	0.456109	-0.0432535	0.00032992	-0.459899	-0.308045	0.201116	-0.333374	-0.0475616	-0.553546	-0.759663	-0.490374	0.0650824	-0.00567879	-0.947213	-0.123231	-0.399718	0.525806	-0.282461	0.16036	-0.00879656	-0.745031	-0.338122	-0.386242	-0.0840485	-0.286139	-0.373988	1.18212	-0.625994	-0.203607
-4.34136	1.26452	-0.648045	-0.571193	-0.379334	-0.350438	0.575164	-0.900871	-0.376728	0.122767	0.594264	-0.175749	-0.291704	-0.210099	-0.174607	0.269054	-0.229105	-0.427589	-0.223377	-0.102759	0.495987	0.458451	-0.0450065	0.000666153	-0.458454	-0.309294	0.201865	-0.335694	-0.0454166	-0.553061	-0.759852	-0.492588	0.0667526	-0.00793527	-0.946549	-0.1233	-0.40003	0.524167	-0.28208	0.162193	-0.00693368	-0.743747	-0.335215	-0.385705	-0.0834268	-0.28613	-0.375419	1.18128	-0.626897	-0.204314
-4.34038	1.26494	-0.646228	-0.573559	-0.379641	-0.349677	0.57498	-0.900886	-0.378573	0.121391	0.594742	-0.177882	-0.290778	-0.208647	-0.171685	0.270575	-0.227734	-0.428176	-0.223971	-0.10298	0.497569	0.460795	-0.0467556	0.000988464	-0.45699	-0.310541	0.2026	-0.338007	-0.0432793	-0.552577	-0.760031	-0.49479	0.0684473	-0.0101927	-0.945882	-0.123366	-0.400353	0.522545	-0.28169	0.164028	-0.00509129	-0.742444	-0.332293	-0.385175	-0.0827984	-0.286119	-0.376846	1.18039	-0.627802	-0.205017
-4.3394	1.26537	-0.644386	-0.575915	-0.379946	-0.348912	0.574799	-0.900866	-0.380431	0.120023	0.595251	-0.180007	-0.289844	-0.207175	-0.168746	0.272106	-0.22636	-0.428749	-0.224569	-0.103228	0.499143	0.463139	-0.0485006	0.00129684	-0.455507	-0.311785	0.203319	-0.340312	-0.0411498	-0.552096	-0.760201	-0.496981	0.0701665	-0.0124512	-0.945211	-0.123429	-0.400687	0.520942	-0.281288	0.165866	-0.00326957	-0.741123	-0.329358	-0.384652	-0.0821634	-0.286106	-0.37827	1.17948	-0.628711	-0.205717
-4.33841	1.2658	-0.64252	-0.57826	-0.380249	-0.348146	0.574621	-0.900811	-0.382302	0.118661	0.595791	-0.182124	-0.288903	-0.205685	-0.165791	0.273646	-0.224983	-0.429307	-0.225169	-0.103504	0.500709	0.465485	-0.0502415	0.00159126	-0.454006	-0.313027	0.204023	-0.342609	-0.0390282	-0.551616	-0.760361	-0.499162	0.0719102	-0.0147106	-0.944537	-0.123488	-0.401032	0.519356	-0.280876	0.167706	-0.00146872	-0.739783	-0.326409	-0.384136	-0.0815216	-0.286092	-0.379689	1.17853	-0.629623	-0.206415
-4.33743	1.26623	-0.640629	-0.580594	-0.380549	-0.347376	0.574447	-0.900721	-0.384187	0.117307	0.596362	-0.184231	-0.287954	-0.204175	-0.16282	0.275196	-0.223603	-0.42985	-0.225773	-0.103807	0.502265	0.467831	-0.051978	0.00187172	-0.452487	-0.314267	0.204712	-0.344898	-0.0369147	-0.551137	-0.760512	-0.50133	0.0736785	-0.0169711	-0.94386	-0.123543	-0.401387	0.517789	-0.280454	0.169548	0.000311082	-0.738426	-0.323447	-0.383627	-0.080873	-0.286076	-0.381103	1.17754	-0.630538	-0.207109
-4.33645	1.26667	-0.638714	-0.582917	-0.380848	-0.346605	0.574277	-0.900596	-0.386084	0.11596	0.596963	-0.186329	-0.286997	-0.202648	-0.159833	0.276754	-0.22222	-0.430378	-0.22638	-0.104138	0.503813	0.470177	-0.0537102	0.00213819	-0.45095	-0.315504	0.205387	-0.347179	-0.0348092	-0.55066	-0.760653	-0.503488	0.0754714	-0.0192325	-0.94318	-0.123595	-0.401753	0.516239	-0.280021	0.171391	0.00206966	-0.73705	-0.320472	-0.383126	-0.0802174	-0.286059	-0.382513	1.17652	-0.631456	-0.2078
-4.33546	1.2671	-0.636774	-0.58523	-0.381144	-0.34583	0.574109	-0.900436	-0.387995	0.114621	0.597595	-0.188418	-0.286034	-0.201102	-0.15683	0.278322	-0.220833	-0.430891	-0.226989	-0.104495	0.505353	0.472524	-0.055438	0.00239067	-0.449395	-0.316738	0.206046	-0.349451	-0.032712	-0.550184	-0.760784	-0.505634	0.0772889	-0.0214948	-0.942497	-0.123643	-0.402128	0.514708	-0.279577	0.173236	0.00380683	-0.735655	-0.317483	-0.382631	-0.0795549	-0.28604	-0.383918	1.17546	-0.632377	-0.208488
-4.33448	1.26754	-0.63481	-0.587531	-0.381439	-0.345053	0.573946	-0.900241	-0.389918	0.113289	0.598258	-0.190498	-0.285063	-0.199539	-0.153812	0.279899	-0.219444	-0.431388	-0.227602	-0.10488	0.506883	0.474871	-0.0571612	0.00262915	-0.447822	-0.31797	0.206691	-0.351714	-0.0306232	-0.549709	-0.760906	-0.507768	0.0791311	-0.0237581	-0.941812	-0.123687	-0.402514	0.513195	-0.279123	0.175082	0.00552242	-0.734243	-0.314481	-0.382144	-0.0788853	-0.28602	-0.385317	1.17438	-0.633301	-0.209173
-4.3335	1.26798	-0.632821	-0.589822	-0.381731	-0.344273	0.573786	-0.90001	-0.391853	0.111965	0.598952	-0.192568	-0.284086	-0.197958	-0.150778	0.281485	-0.218052	-0.431871	-0.228218	-0.105292	0.508404	0.477217	-0.0588797	0.0028536	-0.446231	-0.3192	0.207321	-0.353968	-0.0285427	-0.549235	-0.761019	-0.509891	0.0809981	-0.0260223	-0.941123	-0.123727	-0.40291	0.511701	-0.278659	0.17693	0.00721625	-0.732813	-0.311466	-0.381665	-0.0782085	-0.285998	-0.386712	1.17325	-0.634227	-0.209855
-4.33252	1.26843	-0.630808	-0.592101	-0.382021	-0.34349	0.573629	-0.899745	-0.393801	0.110648	0.599677	-0.194628	-0.283101	-0.19636	-0.147729	0.28308	-0.216657	-0.432337	-0.228837	-0.105732	0.509916	0.479563	-0.0605935	0.00306403	-0.444623	-0.320426	0.207937	-0.356213	-0.0264709	-0.548763	-0.761123	-0.512002	0.0828898	-0.0282875	-0.940432	-0.123764	-0.403316	0.510225	-0.278184	0.178778	0.00888816	-0.731365	-0.308438	-0.381193	-0.0775245	-0.285975	-0.388102	1.1721	-0.635156	-0.210533
-4.33153	1.26887	-0.62877	-0.594369	-0.38231	-0.342704	0.573476	-0.899444	-0.39576	0.10934	0.600433	-0.196678	-0.28211	-0.194746	-0.144665	0.284684	-0.215259	-0.432788	-0.229458	-0.106198	0.51142	0.481908	-0.0623025	0.00326041	-0.442996	-0.32165	0.208537	-0.358449	-0.0244077	-0.548291	-0.761218	-0.514101	0.0848062	-0.0305536	-0.939739	-0.123796	-0.403731	0.508767	-0.277698	0.180626	0.010538	-0.729899	-0.305396	-0.380729	-0.0768332	-0.285951	-0.389485	1.17091	-0.636088	-0.211209
-4.33055	1.26931	-0.626708	-0.596625	-0.382596	-0.341915	0.573326	-0.899107	-0.397731	0.108039	0.601221	-0.198719	-0.281113	-0.193115	-0.141585	0.286296	-0.213858	-0.433224	-0.230083	-0.106691	0.512914	0.484251	-0.0640065	0.00344275	-0.441353	-0.322872	0.209123	-0.360675	-0.0223533	-0.547821	-0.761303	-0.516188	0.0867474	-0.0328206	-0.939043	-0.123825	-0.404156	0.507328	-0.277203	0.182475	0.0121655	-0.728415	-0.302342	-0.380272	-0.0761346	-0.285926	-0.390864	1.16969	-0.637022	-0.211881
-4.32957	1.26976	-0.624621	-0.59887	-0.38288	-0.341123	0.573181	-0.898736	-0.399714	0.106746	0.602039	-0.200749	-0.280109	-0.191469	-0.13849	0.287917	-0.212455	-0.433643	-0.230711	-0.107212	0.514398	0.486594	-0.0657055	0.00361102	-0.439692	-0.32409	0.209694	-0.362891	-0.0203077	-0.547351	-0.761379	-0.518262	0.0887134	-0.0350885	-0.938345	-0.123849	-0.40459	0.505907	-0.276696	0.184323	0.0137707	-0.726914	-0.299274	-0.379823	-0.0754285	-0.285899	-0.392236	1.16844	-0.637958	-0.21255
-4.32858	1.2702	-0.62251	-0.601104	-0.383163	-0.340328	0.573038	-0.898329	-0.401707	0.105461	0.602889	-0.202769	-0.279099	-0.189807	-0.135381	0.289547	-0.211049	-0.434047	-0.231342	-0.107759	0.515873	0.488935	-0.0673995	0.00376523	-0.438014	-0.325306	0.21025	-0.365097	-0.0182711	-0.546882	-0.761447	-0.520325	0.0907041	-0.0373573	-0.937645	-0.12387	-0.405034	0.504504	-0.27618	0.186172	0.0153532	-0.725395	-0.296194	-0.379383	-0.074715	-0.285872	-0.393603	1.16715	-0.638897	-0.213216
-4.3276	1.27065	-0.620375	-0.603326	-0.383444	-0.33953	0.5729	-0.897886	-0.403712	0.104184	0.60377	-0.204779	-0.278083	-0.188129	-0.132256	0.291185	-0.209641	-0.434435	-0.231975	-0.108334	0.517339	0.491274	-0.0690883	0.00390536	-0.436319	-0.326519	0.210792	-0.367292	-0.0162436	-0.546414	-0.761506	-0.522376	0.0927197	-0.0396269	-0.936943	-0.123886	-0.405486	0.503121	-0.275652	0.18802	0.016913	-0.723858	-0.293101	-0.37895	-0.0739938	-0.285843	-0.394963	1.16584	-0.639838	-0.213878
-4.32662	1.2711	-0.618215	-0.605536	-0.383723	-0.338728	0.572765	-0.897409	-0.405728	0.102916	0.604683	-0.206778	-0.277061	-0.186437	-0.129117	0.292831	-0.20823	-0.434807	-0.232612	-0.108935	0.518795	0.493611	-0.0707717	0.00403141	-0.434606	-0.327729	0.21132	-0.369477	-0.0142253	-0.545946	-0.761555	-0.524414	0.0947602	-0.0418975	-0.936239	-0.123898	-0.405948	0.501756	-0.275115	0.189867	0.0184499	-0.722304	-0.289996	-0.378525	-0.073265	-0.285813	-0.396317	1.16449	-0.640781	-0.214537
-4.32563	1.27154	-0.61603	-0.607734	-0.384	-0.337923	0.572633	-0.896895	-0.407754	0.101656	0.605626	-0.208766	-0.276034	-0.18473	-0.125964	0.294485	-0.206817	-0.435162	-0.233252	-0.109563	0.520242	0.495945	-0.0724499	0.00414336	-0.432877	-0.328937	0.211832	-0.371651	-0.0122163	-0.545479	-0.761596	-0.52644	0.0968254	-0.0441688	-0.935533	-0.123906	-0.406418	0.500409	-0.274567	0.191713	0.0199638	-0.720732	-0.286878	-0.378109	-0.0725284	-0.285782	-0.397665	1.16311	-0.641725	-0.215193
-4.32465	1.27199	-0.613821	-0.609921	-0.384276	-0.337115	0.572506	-0.896347	-0.40979	0.100405	0.606602	-0.210743	-0.275001	-0.183009	-0.122796	0.296148	-0.205401	-0.435502	-0.233894	-0.110217	0.521679	0.498277	-0.0741226	0.00424122	-0.431132	-0.330141	0.21233	-0.373814	-0.0102167	-0.545012	-0.761629	-0.528453	0.0989155	-0.046441	-0.934825	-0.123909	-0.406897	0.499081	-0.274009	0.193558	0.0214545	-0.719143	-0.283747	-0.377701	-0.0717841	-0.285751	-0.399005	1.1617	-0.642672	-0.215845
-4.32367	1.27244	-0.611588	-0.612096	-0.38455	-0.336303	0.572382	-0.895763	-0.411837	0.0991617	0.607609	-0.21271	-0.273963	-0.181274	-0.119614	0.297818	-0.203984	-0.435825	-0.234539	-0.110899	0.523106	0.500606	-0.0757898	0.00432499	-0.429369	-0.331343	0.212814	-0.375966	-0.00822653	-0.544545	-0.761653	-0.530454	0.10103	-0.048714	-0.934116	-0.123909	-0.407384	0.497772	-0.273441	0.195402	0.0229218	-0.717537	-0.280604	-0.377301	-0.071032	-0.285718	-0.40034	1.16026	-0.64362	-0.216495
-4.32269	1.27289	-0.60933	-0.614258	-0.384822	-0.335488	0.572262	-0.895143	-0.413893	0.0979273	0.608647	-0.214665	-0.272919	-0.179526	-0.116418	0.299496	-0.202564	-0.436132	-0.235188	-0.111607	0.524523	0.502932	-0.0774513	0.00439464	-0.42759	-0.332541	0.213283	-0.378107	-0.00624598	-0.544079	-0.761668	-0.532442	0.10317	-0.0509879	-0.933406	-0.123903	-0.40788	0.496482	-0.272862	0.197243	0.0243656	-0.715913	-0.277448	-0.376909	-0.0702719	-0.285684	-0.401667	1.15879	-0.64457	-0.21714
-4.3217	1.27333	-0.607048	-0.616409	-0.385093	-0.334669	0.572146	-0.894488	-0.415959	0.0967017	0.609717	-0.216609	-0.271871	-0.177764	-0.113208	0.301182	-0.201141	-0.436422	-0.235839	-0.112341	0.52593	0.505255	-0.0791072	0.00445019	-0.425795	-0.333737	0.213738	-0.380236	-0.00427513	-0.543613	-0.761675	-0.534417	0.105335	-0.0532625	-0.932694	-0.123894	-0.408383	0.49521	-0.272273	0.199083	0.0257858	-0.714273	-0.27428	-0.376527	-0.0695038	-0.285649	-0.402987	1.15729	-0.645522	-0.217783
-4.32072	1.27378	-0.604742	-0.618547	-0.385362	-0.333846	0.572033	-0.893798	-0.418035	0.0954849	0.610819	-0.218541	-0.270818	-0.17599	-0.109984	0.302876	-0.199717	-0.436696	-0.236493	-0.113102	0.527327	0.507574	-0.0807573	0.00449163	-0.423984	-0.33493	0.214179	-0.382353	-0.00231406	-0.543147	-0.761674	-0.536379	0.107524	-0.0555378	-0.931981	-0.12388	-0.408895	0.493958	-0.271674	0.200921	0.0271822	-0.712616	-0.2711	-0.376152	-0.0687276	-0.285614	-0.4043	1.15576	-0.646475	-0.218422
-4.31974	1.27422	-0.602411	-0.620674	-0.38563	-0.333019	0.571924	-0.893072	-0.420119	0.094277	0.611952	-0.220462	-0.26976	-0.174204	-0.106746	0.304577	-0.198291	-0.436954	-0.237149	-0.113889	0.528714	0.509889	-0.0824016	0.00451895	-0.422156	-0.33612	0.214605	-0.384458	-0.000362877	-0.54268	-0.761664	-0.538329	0.109738	-0.057814	-0.931267	-0.123861	-0.409415	0.492724	-0.271065	0.202756	0.0285548	-0.710941	-0.267908	-0.375787	-0.0679434	-0.285577	-0.405605	1.1542	-0.647429	-0.219057
-4.31875	1.27467	-0.600056	-0.622788	-0.385897	-0.332189	0.571819	-0.89231	-0.422212	0.0930782	0.613117	-0.222372	-0.268697	-0.172405	-0.103495	0.306285	-0.196862	-0.437194	-0.237809	-0.114702	0.530091	0.5122	-0.0840399	0.00453217	-0.420313	-0.337307	0.215017	-0.386552	0.00157832	-0.542214	-0.761647	-0.540266	0.111977	-0.0600908	-0.930552	-0.123838	-0.409942	0.491509	-0.270446	0.204588	0.0299033	-0.70925	-0.264703	-0.37543	-0.067151	-0.28554	-0.406903	1.15261	-0.648384	-0.21969
-4.31777	1.27511	-0.597677	-0.624889	-0.386162	-0.331355	0.571718	-0.891513	-0.424314	0.0918884	0.614314	-0.224269	-0.26763	-0.170595	-0.10023	0.308001	-0.195432	-0.437418	-0.238471	-0.115541	0.531457	0.514507	-0.0856723	0.00453126	-0.418453	-0.33849	0.215414	-0.388632	0.00350943	-0.541748	-0.761621	-0.542189	0.11424	-0.0623684	-0.929836	-0.12381	-0.410477	0.490312	-0.269816	0.206417	0.0312276	-0.707542	-0.261487	-0.375082	-0.0663503	-0.285502	-0.408193	1.15099	-0.64934	-0.220319
-4.31679	1.27555	-0.595274	-0.626979	-0.386425	-0.330517	0.571621	-0.890681	-0.426424	0.0907078	0.615542	-0.226154	-0.266559	-0.168773	-0.0969527	0.309723	-0.194	-0.437625	-0.239137	-0.116407	0.532813	0.516809	-0.0872986	0.00451625	-0.416578	-0.339671	0.215798	-0.3907	0.00543036	-0.541281	-0.761587	-0.5441	0.116529	-0.0646466	-0.929119	-0.123777	-0.411019	0.489135	-0.269177	0.208244	0.0325276	-0.705818	-0.258259	-0.374743	-0.0655413	-0.285464	-0.409475	1.14935	-0.650298	-0.220944
-4.3158	1.27599	-0.592846	-0.629055	-0.386687	-0.329674	0.571527	-0.889813	-0.428543	0.0895365	0.616802	-0.228028	-0.265484	-0.16694	-0.0936619	0.311453	-0.192566	-0.437815	-0.239805	-0.117298	0.534159	0.519105	-0.0889187	0.00448712	-0.414688	-0.340849	0.216167	-0.392756	0.00734101	-0.540814	-0.761546	-0.545997	0.118842	-0.0669256	-0.928402	-0.12374	-0.411569	0.487976	-0.268527	0.210066	0.0338032	-0.704077	-0.255019	-0.374413	-0.0647239	-0.285424	-0.410749	1.14767	-0.651256	-0.221566
-4.31482	1.27643	-0.590395	-0.631119	-0.386948	-0.328828	0.571438	-0.888909	-0.430669	0.0883745	0.618094	-0.229889	-0.264405	-0.165097	-0.0903582	0.313189	-0.19113	-0.437988	-0.240475	-0.118215	0.535494	0.521397	-0.0905325	0.00444388	-0.412782	-0.342024	0.216522	-0.394798	0.00924129	-0.540346	-0.761496	-0.547881	0.121179	-0.0692051	-0.927684	-0.123698	-0.412125	0.486836	-0.267868	0.211885	0.0350543	-0.702319	-0.251767	-0.374093	-0.0638982	-0.285384	-0.412014	1.14597	-0.652215	-0.222185
-4.31384	1.27686	-0.587919	-0.633171	-0.387208	-0.327978	0.571352	-0.887971	-0.432803	0.087222	0.619417	-0.231737	-0.263322	-0.163243	-0.0870418	0.314932	-0.189693	-0.438145	-0.241149	-0.119158	0.536818	0.523683	-0.0921401	0.00438654	-0.410861	-0.343195	0.216863	-0.396827	0.0111311	-0.539878	-0.761439	-0.549752	0.123542	-0.0714854	-0.926965	-0.123651	-0.412689	0.485716	-0.267198	0.2137	0.0362807	-0.700546	-0.248504	-0.373781	-0.0630639	-0.285343	-0.413272	1.14424	-0.653174	-0.2228
-4.31286	1.2773	-0.585419	-0.63521	-0.387467	-0.327123	0.57127	-0.886996	-0.434944	0.086079	0.620773	-0.233573	-0.262235	-0.16138	-0.0837128	0.316682	-0.188254	-0.438284	-0.241825	-0.120127	0.538131	0.525964	-0.0937413	0.00431509	-0.408925	-0.344364	0.21719	-0.398843	0.0130104	-0.539409	-0.761374	-0.55161	0.125929	-0.0737662	-0.926247	-0.1236	-0.413259	0.484614	-0.266519	0.21551	0.0374823	-0.698756	-0.245229	-0.373479	-0.0622211	-0.285301	-0.41452	1.14248	-0.654134	-0.223411
-4.31187	1.27773	-0.582895	-0.637236	-0.387724	-0.326264	0.571192	-0.885987	-0.437092	0.0849456	0.62216	-0.235397	-0.261145	-0.159507	-0.0803713	0.318438	-0.186813	-0.438405	-0.242504	-0.121121	0.539434	0.528239	-0.0953361	0.00422954	-0.406973	-0.345529	0.217503	-0.400846	0.014879	-0.538939	-0.761302	-0.553454	0.12834	-0.0760476	-0.925528	-0.123543	-0.413836	0.483531	-0.265829	0.217316	0.038659	-0.696949	-0.241943	-0.373186	-0.0613697	-0.285259	-0.415761	1.1407	-0.655095	-0.22402
-4.31089	1.27816	-0.580347	-0.63925	-0.387981	-0.325401	0.571118	-0.884942	-0.439247	0.083822	0.623579	-0.237208	-0.260052	-0.157625	-0.0770176	0.3202	-0.185371	-0.43851	-0.243185	-0.12214	0.540725	0.530507	-0.0969243	0.0041299	-0.405007	-0.346692	0.217802	-0.402834	0.0167368	-0.538469	-0.761222	-0.555285	0.130776	-0.0783296	-0.924808	-0.123482	-0.414419	0.482466	-0.26513	0.219118	0.0398108	-0.695127	-0.238645	-0.372902	-0.0605096	-0.285216	-0.416992	1.13889	-0.656055	-0.224625
-4.30991	1.27859	-0.577776	-0.64125	-0.388236	-0.324533	0.571048	-0.883861	-0.441409	0.0827082	0.625029	-0.239005	-0.258956	-0.155734	-0.0736518	0.321968	-0.183928	-0.438597	-0.243869	-0.123185	0.542006	0.532769	-0.098506	0.00401618	-0.403027	-0.347851	0.218087	-0.404809	0.0185838	-0.537998	-0.761135	-0.557102	0.133236	-0.0806121	-0.924089	-0.123416	-0.415008	0.481421	-0.264421	0.220914	0.0409374	-0.693289	-0.235336	-0.372628	-0.0596409	-0.285173	-0.418214	1.13705	-0.657016	-0.225226
-4.30892	1.27901	-0.57518	-0.643238	-0.388491	-0.323661	0.570982	-0.882746	-0.443577	0.0816042	0.626512	-0.24079	-0.257857	-0.153834	-0.070274	0.323742	-0.182483	-0.438667	-0.244556	-0.124254	0.543276	0.535024	-0.100081	0.00388837	-0.401031	-0.349007	0.218359	-0.40677	0.0204199	-0.537525	-0.76104	-0.558906	0.135721	-0.0828951	-0.92337	-0.123345	-0.415604	0.480394	-0.263703	0.222705	0.0420388	-0.691436	-0.232016	-0.372364	-0.0587633	-0.285128	-0.419427	1.13519	-0.657977	-0.225824
-4.30794	1.27944	-0.572561	-0.645213	-0.388745	-0.322784	0.57092	-0.881594	-0.445752	0.0805102	0.628026	-0.242562	-0.256754	-0.151926	-0.0668844	0.325522	-0.181037	-0.43872	-0.245246	-0.125349	0.544534	0.537272	-0.101649	0.00374649	-0.399022	-0.350159	0.218616	-0.408716	0.022245	-0.537052	-0.760939	-0.560696	0.13823	-0.0851787	-0.922651	-0.123269	-0.416205	0.479387	-0.262974	0.22449	0.043115	-0.689566	-0.228685	-0.372109	-0.057877	-0.285084	-0.42063	1.1333	-0.658938	-0.226418
-4.30696	1.27986	-0.569918	-0.647174	-0.388997	-0.321903	0.570861	-0.880408	-0.447932	0.0794263	0.629572	-0.24432	-0.25565	-0.150011	-0.0634832	0.327308	-0.179589	-0.438755	-0.245938	-0.126469	0.545781	0.539512	-0.103211	0.00359055	-0.396998	-0.351309	0.21886	-0.410649	0.024059	-0.536578	-0.76083	-0.562472	0.140764	-0.0874626	-0.921933	-0.123187	-0.416813	0.478398	-0.262236	0.22627	0.0441657	-0.687681	-0.225343	-0.371864	-0.0569818	-0.285038	-0.421824	1.13139	-0.659898	-0.227009
-4.30597	1.28027	-0.567251	-0.649123	-0.389249	-0.321017	0.570807	-0.879187	-0.450117	0.0783525	0.631149	-0.246065	-0.254542	-0.148088	-0.0600706	0.329099	-0.17814	-0.438773	-0.246632	-0.127613	0.547017	0.541746	-0.104765	0.00342056	-0.39496	-0.352455	0.21909	-0.412566	0.0258618	-0.536102	-0.760714	-0.564235	0.143322	-0.0897471	-0.921215	-0.123101	-0.417426	0.477428	-0.261488	0.228043	0.0451909	-0.685781	-0.22199	-0.371628	-0.0560776	-0.284992	-0.423008	1.12945	-0.660858	-0.227597
-4.30499	1.28068	-0.56456	-0.651058	-0.3895	-0.320127	0.570757	-0.87793	-0.452308	0.0772889	0.632759	-0.247796	-0.253433	-0.146158	-0.0566467	0.330895	-0.17669	-0.438773	-0.24733	-0.128782	0.548241	0.543971	-0.106313	0.00323652	-0.392908	-0.353599	0.219307	-0.414469	0.0276532	-0.535625	-0.760592	-0.565984	0.145903	-0.0920319	-0.920497	-0.12301	-0.418044	0.476476	-0.260731	0.229811	0.0461906	-0.683865	-0.218626	-0.371403	-0.0551645	-0.284946	-0.424183	1.12749	-0.661818	-0.228181
-4.30401	1.28109	-0.561846	-0.652981	-0.389751	-0.319232	0.570711	-0.876638	-0.454505	0.0762357	0.6344	-0.249513	-0.252321	-0.144222	-0.0532116	0.332697	-0.175239	-0.438755	-0.24803	-0.129975	0.549454	0.546188	-0.107854	0.00303846	-0.390843	-0.354739	0.21951	-0.416357	0.0294334	-0.535146	-0.760463	-0.56772	0.148509	-0.0943171	-0.91978	-0.122913	-0.418668	0.475544	-0.259964	0.231571	0.0471645	-0.681934	-0.215252	-0.371188	-0.0542424	-0.284899	-0.425347	1.12551	-0.662777	-0.228762
-4.30302	1.2815	-0.559109	-0.65489	-0.390001	-0.318332	0.570668	-0.875311	-0.456706	0.0751928	0.636073	-0.251217	-0.251207	-0.142279	-0.0497656	0.334503	-0.173787	-0.43872	-0.248732	-0.131193	0.550655	0.548397	-0.109387	0.00282637	-0.388763	-0.355875	0.2197	-0.41823	0.031202	-0.534666	-0.760327	-0.569441	0.151139	-0.0966027	-0.919064	-0.122812	-0.419297	0.47463	-0.259188	0.233325	0.0481127	-0.679987	-0.211867	-0.370982	-0.0533112	-0.284851	-0.426502	1.1235	-0.663735	-0.229339
-4.30204	1.2819	-0.556348	-0.656786	-0.39025	-0.317427	0.57063	-0.873949	-0.458911	0.0741604	0.637777	-0.252907	-0.250091	-0.14033	-0.0463089	0.336315	-0.172333	-0.438667	-0.249437	-0.132434	0.551844	0.550597	-0.110914	0.00260028	-0.386671	-0.357009	0.219876	-0.420088	0.0329591	-0.534184	-0.760184	-0.571149	0.153794	-0.0988886	-0.918348	-0.122705	-0.419931	0.473735	-0.258402	0.235072	0.0490351	-0.678026	-0.208471	-0.370787	-0.0523709	-0.284803	-0.427646	1.12146	-0.664693	-0.229913
-4.30106	1.2823	-0.553564	-0.658669	-0.390499	-0.316517	0.570596	-0.872552	-0.461121	0.0731386	0.639513	-0.254583	-0.248974	-0.138376	-0.0428416	0.338131	-0.170879	-0.438596	-0.250144	-0.1337	0.553021	0.552789	-0.112433	0.0023602	-0.384565	-0.358139	0.220038	-0.42193	0.0347046	-0.533701	-0.760035	-0.572843	0.156471	-0.101175	-0.917634	-0.122593	-0.42057	0.472859	-0.257607	0.236811	0.0499315	-0.67605	-0.205065	-0.370601	-0.0514214	-0.284754	-0.428779	1.11941	-0.665649	-0.230484
-4.30008	1.2827	-0.550756	-0.660538	-0.390747	-0.315602	0.570566	-0.87112	-0.463335	0.0721274	0.641281	-0.256244	-0.247855	-0.136417	-0.0393638	0.339951	-0.169424	-0.438508	-0.250854	-0.13499	0.554187	0.554971	-0.113945	0.00210615	-0.382446	-0.359266	0.220187	-0.423757	0.0364384	-0.533216	-0.759879	-0.574523	0.159173	-0.103461	-0.916921	-0.122476	-0.421213	0.472001	-0.256802	0.238543	0.050802	-0.674059	-0.201649	-0.370426	-0.0504627	-0.284705	-0.429902	1.11733	-0.666605	-0.231051
-4.29909	1.28309	-0.547926	-0.662394	-0.390995	-0.314683	0.57054	-0.869653	-0.465552	0.071127	0.64308	-0.257892	-0.246734	-0.134452	-0.0358758	0.341776	-0.167968	-0.438402	-0.251567	-0.136303	0.55534	0.557144	-0.11545	0.00183814	-0.380314	-0.36039	0.220323	-0.425568	0.0381603	-0.532729	-0.759718	-0.576189	0.161899	-0.105748	-0.916208	-0.122353	-0.421861	0.471162	-0.255988	0.240267	0.0516464	-0.672054	-0.198223	-0.370261	-0.0494948	-0.284655	-0.431014	1.11523	-0.667559	-0.231614
-4.29811	1.28347	-0.545072	-0.664237	-0.391242	-0.313758	0.570518	-0.868151	-0.467773	0.0701373	0.644911	-0.259524	-0.245612	-0.132483	-0.0323778	0.343605	-0.166511	-0.438277	-0.252281	-0.13764	0.556482	0.559307	-0.116948	0.00155618	-0.378169	-0.36151	0.220446	-0.427363	0.0398704	-0.53224	-0.75955	-0.577841	0.164648	-0.108035	-0.915497	-0.122226	-0.422514	0.470342	-0.255165	0.241983	0.0524647	-0.670034	-0.194786	-0.370107	-0.0485177	-0.284604	-0.432115	1.1131	-0.668512	-0.232174
-4.29713	1.28385	-0.542195	-0.666066	-0.391489	-0.312828	0.5705	-0.866615	-0.469997	0.0691585	0.646773	-0.261143	-0.24449	-0.13051	-0.0288698	0.345438	-0.165053	-0.438135	-0.252999	-0.139	0.557611	0.56146	-0.118438	0.00126031	-0.376011	-0.362628	0.220556	-0.429142	0.0415686	-0.531749	-0.759376	-0.579479	0.16742	-0.110322	-0.914787	-0.122093	-0.42317	0.46954	-0.254333	0.24369	0.0532567	-0.668	-0.19134	-0.369963	-0.0475312	-0.284553	-0.433206	1.11096	-0.669463	-0.232731
-4.29614	1.28423	-0.539295	-0.667882	-0.391736	-0.311893	0.570486	-0.865043	-0.472225	0.0681906	0.648666	-0.262747	-0.243366	-0.128533	-0.0253522	0.347274	-0.163595	-0.437975	-0.253718	-0.140383	0.558728	0.563604	-0.119921	0.000950527	-0.373841	-0.363742	0.220652	-0.430905	0.0432546	-0.531256	-0.759196	-0.581103	0.170217	-0.112609	-0.914079	-0.121954	-0.423831	0.468757	-0.253492	0.245389	0.0540226	-0.665951	-0.187884	-0.369829	-0.0465353	-0.284501	-0.434285	1.10879	-0.670413	-0.233285
-4.29516	1.2846	-0.536372	-0.669684	-0.391983	-0.310952	0.570476	-0.863438	-0.474455	0.0672338	0.650592	-0.264336	-0.242241	-0.126552	-0.0218251	0.349115	-0.162136	-0.437797	-0.25444	-0.14179	0.559833	0.565736	-0.121396	0.000626863	-0.371659	-0.364852	0.220735	-0.432652	0.0449286	-0.53076	-0.75901	-0.582713	0.173036	-0.114897	-0.913372	-0.12181	-0.424496	0.467992	-0.252641	0.247079	0.0547621	-0.663889	-0.184418	-0.369706	-0.04553	-0.284449	-0.435352	1.1066	-0.671361	-0.233835
-4.29418	1.28497	-0.533427	-0.671472	-0.39223	-0.310007	0.570471	-0.861797	-0.476687	0.0662881	0.652548	-0.26591	-0.241115	-0.124569	-0.0182886	0.350958	-0.160676	-0.437601	-0.255165	-0.143219	0.560925	0.567858	-0.122863	0.000289335	-0.369465	-0.36596	0.220806	-0.434383	0.0465903	-0.530263	-0.758818	-0.584309	0.175879	-0.117184	-0.912667	-0.121661	-0.425164	0.467245	-0.251782	0.24876	0.0554752	-0.661812	-0.180942	-0.369594	-0.0445153	-0.284397	-0.436408	1.1044	-0.672308	-0.234382
-4.29319	1.28533	-0.530459	-0.673247	-0.392476	-0.309056	0.570469	-0.860122	-0.478922	0.0653536	0.654536	-0.267469	-0.239989	-0.122583	-0.014743	0.352805	-0.159216	-0.437387	-0.255892	-0.144671	0.562005	0.56997	-0.124323	-6.20334e-05	-0.367258	-0.367064	0.220863	-0.436096	0.0482398	-0.529763	-0.758621	-0.585891	0.178745	-0.119471	-0.911964	-0.121507	-0.425836	0.466517	-0.250914	0.250432	0.0561619	-0.659722	-0.177457	-0.369492	-0.0434912	-0.284343	-0.437453	1.10217	-0.673252	-0.234925
-4.29221	1.28569	-0.527468	-0.675008	-0.392723	-0.3081	0.570471	-0.858413	-0.481158	0.0644303	0.656555	-0.269013	-0.238863	-0.120594	-0.0111884	0.354656	-0.157755	-0.437155	-0.256621	-0.146146	0.563072	0.572069	-0.125776	-0.00042722	-0.36504	-0.368164	0.220908	-0.437794	0.0498769	-0.52926	-0.758418	-0.587459	0.181634	-0.121759	-0.911262	-0.121347	-0.426511	0.465807	-0.250036	0.252094	0.0568221	-0.657617	-0.173963	-0.369401	-0.0424575	-0.284289	-0.438485	1.09992	-0.674194	-0.235465
-4.29123	1.28604	-0.524454	-0.676756	-0.392969	-0.307138	0.570478	-0.856669	-0.483397	0.0635184	0.658605	-0.270542	-0.237736	-0.118603	-0.00762502	0.356508	-0.156294	-0.436904	-0.257352	-0.147642	0.564127	0.574158	-0.12722	-0.0008062	-0.36281	-0.369262	0.220939	-0.439474	0.0515015	-0.528755	-0.75821	-0.589013	0.184546	-0.124046	-0.910563	-0.121182	-0.427189	0.465116	-0.24915	0.253746	0.0574558	-0.6555	-0.170459	-0.369321	-0.0414143	-0.284235	-0.439506	1.09765	-0.675134	-0.236002
-4.29025	1.28639	-0.521419	-0.67849	-0.393216	-0.306171	0.570488	-0.854892	-0.485636	0.0626179	0.660686	-0.272055	-0.23661	-0.11661	-0.00405307	0.358364	-0.154832	-0.436636	-0.258086	-0.149161	0.565168	0.576235	-0.128657	-0.00119895	-0.360569	-0.370356	0.220958	-0.441137	0.0531137	-0.528248	-0.757997	-0.590552	0.187481	-0.126333	-0.909865	-0.121011	-0.427871	0.464442	-0.248256	0.255388	0.058063	-0.653368	-0.166946	-0.369252	-0.0403615	-0.28418	-0.440515	1.09537	-0.676071	-0.236536
-4.28926	1.28673	-0.51836	-0.68021	-0.393463	-0.305199	0.570503	-0.85308	-0.487877	0.0617289	0.662798	-0.273554	-0.235483	-0.114617	-0.000472724	0.360222	-0.15337	-0.436349	-0.258822	-0.150702	0.566197	0.578299	-0.130086	-0.00160544	-0.358316	-0.371447	0.220965	-0.442783	0.0547132	-0.527738	-0.757778	-0.592078	0.190439	-0.128621	-0.90917	-0.120835	-0.428556	0.463787	-0.247352	0.25702	0.0586436	-0.651224	-0.163424	-0.369193	-0.0392991	-0.284124	-0.441511	1.09306	-0.677006	-0.237066
-4.28828	1.28707	-0.51528	-0.681917	-0.39371	-0.30422	0.570522	-0.851233	-0.490119	0.0608514	0.664942	-0.275036	-0.234356	-0.112622	0.00311583	0.362083	-0.151907	-0.436045	-0.25956	-0.152265	0.567213	0.580352	-0.131507	-0.00202565	-0.356052	-0.372535	0.220958	-0.444412	0.0563001	-0.527225	-0.757554	-0.593589	0.193419	-0.130908	-0.908477	-0.120653	-0.429243	0.46315	-0.24644	0.258641	0.0591975	-0.649066	-0.159893	-0.369146	-0.0382271	-0.284067	-0.442495	1.09074	-0.677939	-0.237593
-4.2873	1.2874	-0.512178	-0.68361	-0.393957	-0.303237	0.570545	-0.849353	-0.492361	0.0599856	0.667116	-0.276503	-0.23323	-0.110626	0.0067124	0.363945	-0.150444	-0.435722	-0.260301	-0.153849	0.568216	0.582392	-0.13292	-0.00245955	-0.353777	-0.373619	0.220939	-0.446024	0.0578742	-0.526709	-0.757325	-0.595087	0.196422	-0.133195	-0.907786	-0.120466	-0.429933	0.462531	-0.24552	0.260251	0.0597248	-0.646895	-0.156353	-0.369109	-0.0371455	-0.28401	-0.443466	1.0884	-0.678868	-0.238117
-4.28631	1.28772	-0.509053	-0.685289	-0.394205	-0.302247	0.570572	-0.84744	-0.494603	0.0591314	0.669321	-0.277954	-0.232104	-0.10863	0.0103168	0.36581	-0.148981	-0.43538	-0.261044	-0.155455	0.569206	0.584419	-0.134325	-0.0029071	-0.351492	-0.3747	0.220908	-0.447618	0.0594355	-0.52619	-0.757091	-0.59657	0.199447	-0.135481	-0.907097	-0.120274	-0.430625	0.46193	-0.244591	0.26185	0.0602254	-0.644712	-0.152805	-0.369084	-0.0360541	-0.283953	-0.444425	1.08604	-0.679795	-0.238638
-4.28533	1.28804	-0.505907	-0.686954	-0.394453	-0.301252	0.570603	-0.845492	-0.496846	0.0582891	0.671557	-0.27939	-0.230979	-0.106634	0.0139288	0.367676	-0.147518	-0.435021	-0.261789	-0.157082	0.570182	0.586434	-0.135723	-0.00336829	-0.349196	-0.375777	0.220864	-0.449194	0.0609839	-0.525668	-0.756852	-0.598039	0.202494	-0.137768	-0.906411	-0.120076	-0.43132	0.461346	-0.243653	0.263438	0.0606993	-0.642515	-0.149248	-0.369069	-0.0349531	-0.283894	-0.445371	1.08366	-0.680718	-0.239155
-4.28435	1.28835	-0.502739	-0.688605	-0.394702	-0.300252	0.570638	-0.843511	-0.499088	0.0574585	0.673823	-0.280809	-0.229854	-0.104639	0.0175483	0.369544	-0.146055	-0.434644	-0.262536	-0.158729	0.571145	0.588435	-0.137112	-0.00384307	-0.346889	-0.376852	0.220808	-0.450753	0.0625194	-0.525144	-0.756609	-0.599494	0.205564	-0.140054	-0.905728	-0.119872	-0.432016	0.460781	-0.242707	0.265014	0.0611465	-0.640306	-0.145682	-0.369066	-0.0338423	-0.283835	-0.446304	1.08127	-0.681639	-0.23967
-4.28336	1.28866	-0.499549	-0.690243	-0.394951	-0.299245	0.570678	-0.841496	-0.50133	0.0566399	0.67612	-0.282213	-0.228731	-0.102644	0.021175	0.371413	-0.144591	-0.434248	-0.263285	-0.160398	0.572095	0.590422	-0.138493	-0.00433142	-0.344572	-0.377923	0.220739	-0.452294	0.0640418	-0.524616	-0.756361	-0.600935	0.208655	-0.142339	-0.905047	-0.119663	-0.432715	0.460233	-0.241753	0.266579	0.0615669	-0.638085	-0.142108	-0.369074	-0.0327218	-0.283775	-0.447223	1.07886	-0.682556	-0.240181
-4.28238	1.28895	-0.496337	-0.691866	-0.395201	-0.298233	0.570721	-0.839447	-0.503572	0.0558332	0.678448	-0.2836	-0.227608	-0.10065	0.0248087	0.373283	-0.143128	-0.433834	-0.264036	-0.162087	0.573032	0.592396	-0.139866	-0.00483331	-0.342245	-0.37899	0.220658	-0.453817	0.0655511	-0.524084	-0.756109	-0.602361	0.211768	-0.144625	-0.904369	-0.119448	-0.433416	0.459703	-0.240791	0.268131	0.0619605	-0.635851	-0.138526	-0.369093	-0.0315915	-0.283715	-0.44813	1.07644	-0.683469	-0.240689
-4.2814	1.28925	-0.493104	-0.693476	-0.395452	-0.297215	0.570769	-0.837366	-0.505812	0.0550386	0.680806	-0.284972	-0.226487	-0.0986576	0.0284493	0.375155	-0.141664	-0.433401	-0.26479	-0.163797	0.573954	0.594356	-0.141231	-0.00534869	-0.339908	-0.380055	0.220565	-0.455322	0.0670472	-0.52355	-0.755852	-0.603774	0.214903	-0.14691	-0.903694	-0.119228	-0.434118	0.45919	-0.23982	0.269671	0.0623274	-0.633605	-0.134935	-0.369124	-0.0304515	-0.283653	-0.449023	1.074	-0.684379	-0.241194
-4.28041	1.28953	-0.48985	-0.695071	-0.395703	-0.296191	0.57082	-0.835251	-0.508051	0.0542561	0.683195	-0.286326	-0.225366	-0.0966668	0.0320966	0.377026	-0.1402	-0.432951	-0.265546	-0.165527	0.574864	0.596302	-0.142587	-0.00587753	-0.337561	-0.381116	0.22046	-0.456809	0.0685301	-0.523012	-0.755591	-0.605172	0.21806	-0.149194	-0.903022	-0.119002	-0.434822	0.458695	-0.238842	0.271199	0.0626675	-0.631347	-0.131337	-0.369166	-0.0293016	-0.283591	-0.449903	1.07154	-0.685286	-0.241696
-4.27943	1.28981	-0.486575	-0.696653	-0.395955	-0.295161	0.570876	-0.833103	-0.510289	0.0534857	0.685613	-0.287665	-0.224247	-0.0946781	0.0357503	0.378899	-0.138737	-0.432482	-0.266303	-0.167276	0.575759	0.598233	-0.143935	-0.00641981	-0.335205	-0.382174	0.220343	-0.458277	0.0699997	-0.522471	-0.755326	-0.606557	0.221238	-0.151478	-0.902353	-0.118771	-0.435527	0.458217	-0.237855	0.272713	0.0629808	-0.629077	-0.12773	-0.36922	-0.0281419	-0.283528	-0.450769	1.06907	-0.686188	-0.242195
-4.27845	1.29008	-0.483278	-0.698221	-0.396208	-0.294126	0.570936	-0.830922	-0.512525	0.0527276	0.688062	-0.288987	-0.22313	-0.0926918	0.0394102	0.380772	-0.137273	-0.431995	-0.267063	-0.169046	0.576641	0.600149	-0.145275	-0.00697547	-0.332839	-0.383228	0.220213	-0.459727	0.0714559	-0.521926	-0.755057	-0.607927	0.224437	-0.153761	-0.901687	-0.118534	-0.436234	0.457757	-0.236861	0.274215	0.0632673	-0.626796	-0.124116	-0.369284	-0.0269724	-0.283464	-0.451621	1.06658	-0.687086	-0.242691
-4.27747	1.29035	-0.479961	-0.699775	-0.396462	-0.293084	0.571	-0.828708	-0.514758	0.0519818	0.690541	-0.290292	-0.222014	-0.0907082	0.0430762	0.382645	-0.13581	-0.43149	-0.267825	-0.170835	0.577509	0.602051	-0.146607	-0.00754448	-0.330465	-0.384279	0.220072	-0.461159	0.0728986	-0.521378	-0.754784	-0.609283	0.227658	-0.156044	-0.901024	-0.118292	-0.436941	0.457314	-0.235859	0.275704	0.063527	-0.624503	-0.120494	-0.369361	-0.025793	-0.283399	-0.45246	1.06408	-0.687981	-0.243184
-4.27648	1.29061	-0.476622	-0.701315	-0.396717	-0.292037	0.571068	-0.826462	-0.51699	0.0512483	0.693049	-0.291581	-0.220901	-0.0887276	0.046748	0.384518	-0.134346	-0.430966	-0.268588	-0.172643	0.578363	0.603937	-0.14793	-0.00812681	-0.328081	-0.385327	0.219919	-0.462572	0.0743278	-0.520825	-0.754507	-0.610625	0.230899	-0.158326	-0.900364	-0.118044	-0.437649	0.456887	-0.234849	0.277179	0.06376	-0.622198	-0.116865	-0.369449	-0.0246038	-0.283334	-0.453284	1.06157	-0.688871	-0.243674
-4.2755	1.29086	-0.473263	-0.702841	-0.396973	-0.290983	0.57114	-0.824183	-0.519219	0.0505273	0.695588	-0.292853	-0.219789	-0.0867504	0.0504255	0.38639	-0.132883	-0.430424	-0.269354	-0.174471	0.579203	0.605808	-0.149245	-0.00872241	-0.325688	-0.386372	0.219754	-0.463966	0.0757435	-0.52027	-0.754227	-0.611953	0.234161	-0.160607	-0.899708	-0.11779	-0.438359	0.456478	-0.233831	0.27864	0.0639662	-0.619882	-0.113228	-0.369548	-0.0234047	-0.283267	-0.454094	1.05904	-0.689757	-0.244161
-4.27452	1.2911	-0.469883	-0.704353	-0.39723	-0.289923	0.571216	-0.821871	-0.521445	0.0498187	0.698156	-0.294108	-0.218679	-0.0847769	0.0541085	0.388262	-0.13142	-0.429864	-0.270122	-0.176317	0.580028	0.607663	-0.150552	-0.00933125	-0.323287	-0.387413	0.219578	-0.465342	0.0771455	-0.51971	-0.753943	-0.613267	0.237444	-0.162888	-0.899056	-0.117531	-0.439068	0.456086	-0.232806	0.280087	0.0641456	-0.617556	-0.109585	-0.36966	-0.0221957	-0.283199	-0.45489	1.0565	-0.690638	-0.244645
-4.27353	1.29134	-0.466483	-0.70585	-0.397488	-0.288857	0.571296	-0.819527	-0.523668	0.0491226	0.700754	-0.295346	-0.217571	-0.0828073	0.0577966	0.390133	-0.129958	-0.429286	-0.270891	-0.178182	0.58084	0.609502	-0.15185	-0.00995327	-0.320877	-0.388451	0.21939	-0.466698	0.0785337	-0.519147	-0.753656	-0.614568	0.240747	-0.165167	-0.898406	-0.117267	-0.439778	0.455711	-0.231773	0.281521	0.0642983	-0.615218	-0.105933	-0.369783	-0.0209769	-0.283131	-0.455672	1.05394	-0.691514	-0.245127
-4.27255	1.29157	-0.463063	-0.707334	-0.397748	-0.287785	0.571381	-0.817151	-0.525888	0.0484392	0.703381	-0.296567	-0.216465	-0.0808422	0.0614899	0.392004	-0.128496	-0.428689	-0.271663	-0.180065	0.581637	0.611325	-0.15314	-0.0105884	-0.318459	-0.389486	0.21919	-0.468036	0.0799083	-0.518579	-0.753365	-0.615854	0.244071	-0.167446	-0.897761	-0.116997	-0.440489	0.455352	-0.230733	0.28294	0.0644243	-0.612869	-0.102275	-0.369917	-0.0197481	-0.283061	-0.456439	1.05138	-0.692386	-0.245606
-4.27157	1.29179	-0.459622	-0.708804	-0.398009	-0.286707	0.571469	-0.814743	-0.528104	0.0477684	0.706038	-0.297771	-0.215362	-0.0788816	0.0651879	0.393873	-0.127034	-0.428075	-0.272436	-0.181967	0.58242	0.613131	-0.154421	-0.0112367	-0.316032	-0.390517	0.218979	-0.469355	0.0812689	-0.518008	-0.753071	-0.617126	0.247414	-0.169724	-0.897119	-0.116721	-0.4412	0.45501	-0.229686	0.284344	0.0645236	-0.61051	-0.0986103	-0.370064	-0.0185095	-0.282991	-0.457191	1.0488	-0.693253	-0.246082
-4.27058	1.292	-0.456161	-0.71026	-0.398272	-0.285623	0.571561	-0.812303	-0.530317	0.0471103	0.708723	-0.298957	-0.214262	-0.076926	0.0688906	0.395741	-0.125572	-0.427442	-0.273211	-0.183886	0.583189	0.614921	-0.155693	-0.011898	-0.313598	-0.391546	0.218756	-0.470654	0.0826157	-0.517432	-0.752774	-0.618384	0.250778	-0.172001	-0.896481	-0.11644	-0.44191	0.454685	-0.228631	0.285733	0.0645963	-0.60814	-0.0949386	-0.370222	-0.0172609	-0.282919	-0.457929	1.04621	-0.694115	-0.246555
-4.2696	1.2922	-0.452681	-0.711702	-0.398536	-0.284533	0.571658	-0.809832	-0.532525	0.046465	0.711438	-0.300127	-0.213164	-0.0749757	0.0725977	0.397607	-0.124111	-0.426791	-0.273988	-0.185824	0.583943	0.616694	-0.156957	-0.0125723	-0.311156	-0.39257	0.218522	-0.471934	0.0839485	-0.516853	-0.752474	-0.619628	0.254162	-0.174277	-0.895847	-0.116153	-0.442621	0.454375	-0.227569	0.287108	0.0646423	-0.60576	-0.0912602	-0.370392	-0.0160025	-0.282846	-0.458652	1.04361	-0.694971	-0.247025
-4.26862	1.2924	-0.44918	-0.713129	-0.398801	-0.283436	0.571758	-0.807329	-0.534729	0.0458325	0.714182	-0.301279	-0.212069	-0.0730311	0.076309	0.399472	-0.12265	-0.426122	-0.274767	-0.187778	0.584682	0.61845	-0.158212	-0.0132596	-0.308707	-0.393592	0.218276	-0.473195	0.0852673	-0.516269	-0.752171	-0.620859	0.257565	-0.176552	-0.895217	-0.115861	-0.443331	0.454083	-0.2265	0.288467	0.0646617	-0.60337	-0.0875753	-0.370574	-0.0147341	-0.282772	-0.45936	1.041	-0.695823	-0.247493
-4.26764	1.29259	-0.44566	-0.714543	-0.399068	-0.282333	0.571863	-0.804794	-0.536928	0.0452128	0.716954	-0.302414	-0.210977	-0.0710923	0.0800243	0.401334	-0.12119	-0.425434	-0.275548	-0.189751	0.585407	0.620189	-0.159459	-0.0139598	-0.30625	-0.394611	0.21802	-0.474437	0.0865721	-0.515681	-0.751865	-0.622076	0.260987	-0.178826	-0.89459	-0.115563	-0.444041	0.453806	-0.225424	0.289811	0.0646546	-0.600969	-0.0838841	-0.370767	-0.0134559	-0.282696	-0.460052	1.03838	-0.696668	-0.247958
-4.26665	1.29277	-0.442121	-0.715942	-0.399337	-0.281224	0.571971	-0.802228	-0.539123	0.0446061	0.719756	-0.303531	-0.209887	-0.0691597	0.0837434	0.403195	-0.119731	-0.424729	-0.27633	-0.19174	0.586117	0.62191	-0.160697	-0.0146729	-0.303786	-0.395626	0.217752	-0.475659	0.0878627	-0.515089	-0.751557	-0.623278	0.264429	-0.181099	-0.893968	-0.115259	-0.44475	0.453545	-0.224341	0.291139	0.0646209	-0.598559	-0.0801866	-0.370973	-0.0121677	-0.28262	-0.46073	1.03575	-0.697509	-0.248421
-4.26567	1.29294	-0.438562	-0.717328	-0.399607	-0.280109	0.572084	-0.799631	-0.541312	0.0440123	0.722585	-0.30463	-0.208801	-0.0672336	0.0874662	0.405053	-0.118271	-0.424006	-0.277114	-0.193746	0.586812	0.623613	-0.161926	-0.0153988	-0.301314	-0.396638	0.217473	-0.476862	0.0891391	-0.514492	-0.751246	-0.624468	0.267889	-0.18337	-0.89335	-0.11495	-0.445459	0.4533	-0.223251	0.292451	0.0645608	-0.596139	-0.076483	-0.371191	-0.0108697	-0.282542	-0.461392	1.0331	-0.698343	-0.248881
-4.26469	1.29311	-0.434985	-0.718699	-0.39988	-0.278987	0.5722	-0.797003	-0.543496	0.0434315	0.725444	-0.305712	-0.207719	-0.0653144	0.0911923	0.406908	-0.116813	-0.423264	-0.2779	-0.195768	0.587493	0.625299	-0.163147	-0.0161374	-0.298836	-0.397646	0.217183	-0.478045	0.0904012	-0.513891	-0.750933	-0.625643	0.271369	-0.18564	-0.892736	-0.114636	-0.446166	0.453071	-0.222155	0.293747	0.0644742	-0.59371	-0.0727734	-0.37142	-0.00956178	-0.282462	-0.462038	1.03045	-0.699172	-0.249339
-4.2637	1.29326	-0.431388	-0.720057	-0.400154	-0.277859	0.57232	-0.794345	-0.545675	0.0428638	0.72833	-0.306776	-0.206639	-0.0634023	0.0949215	0.40876	-0.115355	-0.422505	-0.278687	-0.197807	0.588158	0.626965	-0.164359	-0.0168887	-0.296352	-0.398652	0.216882	-0.479208	0.0916491	-0.513285	-0.750617	-0.626805	0.274867	-0.187909	-0.892127	-0.114316	-0.446873	0.452858	-0.221052	0.295026	0.0643613	-0.591271	-0.0690581	-0.371662	-0.00824398	-0.282382	-0.462669	1.02779	-0.699995	-0.249794
-4.26272	1.29341	-0.427772	-0.7214	-0.40043	-0.276725	0.572445	-0.791656	-0.547847	0.0423092	0.731244	-0.307823	-0.205563	-0.0614976	0.0986538	0.410609	-0.113898	-0.421727	-0.279477	-0.199862	0.588808	0.628614	-0.165562	-0.0176527	-0.293861	-0.399654	0.21657	-0.480352	0.0928826	-0.512675	-0.750299	-0.627953	0.278384	-0.190176	-0.891522	-0.113991	-0.447579	0.45266	-0.219942	0.296289	0.064222	-0.588823	-0.065337	-0.371916	-0.0069163	-0.282299	-0.463285	1.02513	-0.700811	-0.250247
-4.26174	1.29355	-0.424138	-0.722729	-0.400709	-0.275584	0.572573	-0.788936	-0.550014	0.0417678	0.734187	-0.308851	-0.20449	-0.0596007	0.102389	0.412455	-0.112441	-0.420932	-0.280267	-0.201932	0.589444	0.630244	-0.166756	-0.0184293	-0.291363	-0.400653	0.216248	-0.481476	0.0941017	-0.51206	-0.749979	-0.629087	0.281918	-0.192442	-0.890921	-0.11366	-0.448283	0.452478	-0.218826	0.297536	0.0640565	-0.586367	-0.0616103	-0.372182	-0.00557877	-0.282216	-0.463884	1.02245	-0.701622	-0.250697
-4.26075	1.29368	-0.420485	-0.724045	-0.400989	-0.274437	0.572705	-0.786187	-0.552174	0.0412396	0.737157	-0.309862	-0.203422	-0.0577118	0.106126	0.414298	-0.110985	-0.420119	-0.28106	-0.204019	0.590064	0.631855	-0.167942	-0.0192184	-0.288859	-0.401649	0.215914	-0.482579	0.0953063	-0.511441	-0.749658	-0.630208	0.285471	-0.194707	-0.890325	-0.113324	-0.448986	0.452311	-0.217704	0.298765	0.0638649	-0.583901	-0.0578782	-0.37246	-0.00423138	-0.282131	-0.464468	1.01976	-0.702426	-0.251146
-4.25977	1.2938	-0.416813	-0.725346	-0.401271	-0.273284	0.572842	-0.783407	-0.554328	0.0407246	0.740155	-0.310855	-0.202357	-0.0558311	0.109866	0.416136	-0.10953	-0.419287	-0.281854	-0.20612	0.590669	0.633446	-0.169118	-0.02002	-0.28635	-0.402641	0.21557	-0.483664	0.0964964	-0.510817	-0.749334	-0.631316	0.289042	-0.196969	-0.889733	-0.112982	-0.449687	0.452159	-0.216575	0.299977	0.063647	-0.581427	-0.0541408	-0.37275	-0.00287416	-0.282044	-0.465036	1.01707	-0.703223	-0.251591
-4.25879	1.29391	-0.413124	-0.726633	-0.401556	-0.272124	0.572982	-0.780597	-0.556474	0.0402229	0.74318	-0.311829	-0.201296	-0.0539591	0.113608	0.417971	-0.108076	-0.418438	-0.282649	-0.208237	0.591259	0.635019	-0.170286	-0.020834	-0.283835	-0.40363	0.215215	-0.484728	0.097672	-0.510188	-0.749009	-0.632409	0.29263	-0.199231	-0.889146	-0.112635	-0.450386	0.452022	-0.21544	0.301172	0.0634031	-0.578944	-0.0503983	-0.373052	-0.00150712	-0.281955	-0.465587	1.01437	-0.704014	-0.252035
-4.2578	1.29401	-0.409416	-0.727906	-0.401843	-0.270958	0.573125	-0.777758	-0.558614	0.0397345	0.746232	-0.312786	-0.200238	-0.052096	0.117352	0.419801	-0.106622	-0.417572	-0.283447	-0.210368	0.591833	0.636572	-0.171446	-0.0216604	-0.281314	-0.404617	0.21485	-0.485772	0.0988329	-0.509554	-0.748682	-0.63349	0.296236	-0.20149	-0.888564	-0.112282	-0.451084	0.4519	-0.214299	0.30235	0.0631333	-0.576452	-0.0466507	-0.373366	-0.000130278	-0.281865	-0.466123	1.01167	-0.704798	-0.252477
-4.25682	1.2941	-0.405691	-0.729165	-0.402133	-0.269785	0.573273	-0.774889	-0.560747	0.0392595	0.749312	-0.313724	-0.199185	-0.050242	0.121098	0.421627	-0.105169	-0.416687	-0.284245	-0.212515	0.592392	0.638105	-0.172596	-0.0224991	-0.278788	-0.4056	0.214474	-0.486796	0.0999791	-0.508916	-0.748353	-0.634557	0.299859	-0.203748	-0.887987	-0.111924	-0.45178	0.451793	-0.213153	0.30351	0.0628375	-0.573953	-0.0428982	-0.373693	0.00125635	-0.281773	-0.466642	1.00896	-0.705575	-0.252916
-4.25584	1.29419	-0.401948	-0.730411	-0.402425	-0.268606	0.573425	-0.771991	-0.562872	0.0387979	0.752418	-0.314644	-0.198136	-0.0483975	0.124845	0.423449	-0.103717	-0.415785	-0.285045	-0.214675	0.592935	0.639618	-0.173737	-0.0233501	-0.276256	-0.406579	0.214088	-0.4878	0.101111	-0.508273	-0.748024	-0.635611	0.303499	-0.206004	-0.887414	-0.111561	-0.452473	0.4517	-0.212	0.304651	0.0625159	-0.571446	-0.039141	-0.374032	0.00265275	-0.28168	-0.467145	1.00624	-0.706345	-0.253353
-4.25486	1.29426	-0.398187	-0.731642	-0.402719	-0.26742	0.57358	-0.769064	-0.564989	0.0383497	0.755551	-0.315546	-0.197092	-0.0465627	0.128593	0.425265	-0.102266	-0.414865	-0.285847	-0.21685	0.593463	0.641111	-0.17487	-0.0242132	-0.27372	-0.407556	0.213691	-0.488783	0.102227	-0.507624	-0.747693	-0.636652	0.307155	-0.208258	-0.886846	-0.111192	-0.453165	0.451622	-0.210841	0.305775	0.0621685	-0.56893	-0.0353792	-0.374383	0.0040589	-0.281584	-0.467631	1.00352	-0.707108	-0.253788
-4.25387	1.29433	-0.394409	-0.732859	-0.403016	-0.266228	0.57374	-0.766109	-0.567098	0.037915	0.758711	-0.316429	-0.196052	-0.0447379	0.132343	0.427076	-0.100816	-0.413928	-0.28665	-0.219038	0.593975	0.642584	-0.175993	-0.0250884	-0.271179	-0.40853	0.213284	-0.489747	0.103329	-0.506971	-0.747361	-0.637679	0.310828	-0.21051	-0.886284	-0.110818	-0.453854	0.451558	-0.209677	0.30688	0.0617955	-0.566407	-0.031613	-0.374746	0.00547477	-0.281487	-0.468101	1.00079	-0.707864	-0.254222
-4.25289	1.29438	-0.390614	-0.734062	-0.403316	-0.26503	0.573903	-0.763124	-0.569199	0.0374938	0.761897	-0.317294	-0.195016	-0.0429233	0.136093	0.428882	-0.0993665	-0.412973	-0.287454	-0.22124	0.594472	0.644036	-0.177108	-0.0259757	-0.268633	-0.4095	0.212867	-0.49069	0.104416	-0.506313	-0.747027	-0.638694	0.314518	-0.212761	-0.885726	-0.110438	-0.45454	0.451508	-0.208507	0.307967	0.0613969	-0.563877	-0.0278423	-0.375122	0.00690034	-0.281387	-0.468554	0.998055	-0.708612	-0.254653
-4.25191	1.29443	-0.386802	-0.735251	-0.403618	-0.263825	0.57407	-0.760111	-0.571291	0.0370862	0.765109	-0.318141	-0.193985	-0.0411194	0.139844	0.430683	-0.0979182	-0.412	-0.28826	-0.223455	0.594952	0.645467	-0.178214	-0.0268749	-0.266082	-0.410467	0.21244	-0.491613	0.105489	-0.50565	-0.746693	-0.639695	0.318223	-0.215009	-0.885173	-0.110054	-0.455224	0.451472	-0.207332	0.309035	0.0609728	-0.561339	-0.0240675	-0.37551	0.00833559	-0.281286	-0.46899	0.995317	-0.709353	-0.255082
-4.25092	1.29447	-0.382974	-0.736427	-0.403923	-0.262614	0.57424	-0.75707	-0.573375	0.0366921	0.768347	-0.318969	-0.192959	-0.0393262	0.143596	0.432477	-0.0964708	-0.411011	-0.289067	-0.225683	0.595417	0.646877	-0.17931	-0.0277861	-0.263528	-0.411431	0.212003	-0.492516	0.106546	-0.504981	-0.746358	-0.640683	0.321945	-0.217255	-0.884626	-0.109664	-0.455905	0.45145	-0.206152	0.310085	0.0605234	-0.558794	-0.0202887	-0.37591	0.00978049	-0.281182	-0.46941	0.992576	-0.710086	-0.25551
-4.24994	1.29449	-0.379128	-0.737588	-0.404231	-0.261396	0.574415	-0.754001	-0.575449	0.0363117	0.771611	-0.319778	-0.191937	-0.0375441	0.147347	0.434266	-0.0950244	-0.410004	-0.289876	-0.227924	0.595867	0.648266	-0.180398	-0.0287091	-0.260969	-0.412392	0.211556	-0.493398	0.107588	-0.504308	-0.746023	-0.641658	0.325681	-0.219499	-0.884083	-0.109268	-0.456583	0.451442	-0.204966	0.311115	0.0600486	-0.556243	-0.0165059	-0.376322	0.011235	-0.281077	-0.469812	0.98983	-0.710812	-0.255936
-4.24896	1.29451	-0.375266	-0.738735	-0.404542	-0.260171	0.574593	-0.750904	-0.577515	0.0359448	0.774901	-0.320569	-0.19092	-0.0357733	0.151099	0.436048	-0.0935789	-0.408979	-0.290686	-0.230178	0.5963	0.649634	-0.181477	-0.0296439	-0.258406	-0.41335	0.211098	-0.49426	0.108615	-0.503629	-0.745687	-0.642621	0.329434	-0.22174	-0.883546	-0.108868	-0.457258	0.451447	-0.203775	0.312126	0.0595487	-0.553684	-0.0127194	-0.376747	0.0126991	-0.280969	-0.470198	0.987082	-0.711529	-0.25636
-4.24797	1.29452	-0.371388	-0.739869	-0.404856	-0.258941	0.574775	-0.747779	-0.579571	0.0355917	0.778215	-0.321341	-0.189908	-0.0340142	0.15485	0.437824	-0.0921345	-0.407937	-0.291497	-0.232444	0.596717	0.65098	-0.182547	-0.0305904	-0.25584	-0.414305	0.210631	-0.495101	0.109627	-0.502945	-0.74535	-0.64357	0.333201	-0.223979	-0.883014	-0.108462	-0.45793	0.451466	-0.202579	0.313118	0.0590237	-0.551119	-0.00892924	-0.377184	0.0141728	-0.280859	-0.470566	0.98433	-0.712239	-0.256782
-4.24699	1.29452	-0.367494	-0.740988	-0.405173	-0.257703	0.57496	-0.744628	-0.581618	0.0352522	0.781555	-0.322095	-0.188901	-0.0322668	0.158601	0.439594	-0.0906912	-0.406879	-0.292309	-0.234722	0.597118	0.652304	-0.183608	-0.0315486	-0.25327	-0.415256	0.210155	-0.495922	0.110624	-0.502256	-0.745013	-0.644507	0.336983	-0.226216	-0.882488	-0.108051	-0.458599	0.451498	-0.201378	0.31409	0.0584737	-0.548547	-0.0051356	-0.377634	0.015656	-0.280746	-0.470918	0.981576	-0.71294	-0.257203
-4.24601	1.2945	-0.363584	-0.742094	-0.405494	-0.256459	0.575149	-0.741449	-0.583654	0.0349265	0.784921	-0.32283	-0.1879	-0.0305316	0.162352	0.441356	-0.0892489	-0.405803	-0.293123	-0.237011	0.597503	0.653607	-0.18466	-0.0325183	-0.250697	-0.416205	0.209668	-0.496723	0.111606	-0.501561	-0.744676	-0.645431	0.34078	-0.228451	-0.881967	-0.107635	-0.459264	0.451543	-0.200172	0.315043	0.0578989	-0.545969	-0.00133862	-0.378096	0.0171487	-0.280632	-0.471252	0.978819	-0.713633	-0.257623
-4.24503	1.29448	-0.359658	-0.743186	-0.405817	-0.255209	0.575342	-0.738243	-0.585681	0.0346145	0.78831	-0.323546	-0.186903	-0.0288087	0.166101	0.443111	-0.0878077	-0.40471	-0.293937	-0.239312	0.597872	0.654887	-0.185703	-0.0334995	-0.24812	-0.417151	0.209172	-0.497503	0.112573	-0.500861	-0.744339	-0.646343	0.344591	-0.230683	-0.881451	-0.107214	-0.459926	0.4516	-0.198961	0.315976	0.0572994	-0.543385	0.00246156	-0.37857	0.0186509	-0.280514	-0.471569	0.976061	-0.714318	-0.25804
-4.24404	1.29445	-0.355717	-0.744264	-0.406144	-0.253953	0.575538	-0.73501	-0.587697	0.0343162	0.791725	-0.324243	-0.185912	-0.0270984	0.16985	0.444859	-0.0863676	-0.4036	-0.294753	-0.241625	0.598225	0.656145	-0.186737	-0.0344921	-0.245541	-0.418093	0.208666	-0.498262	0.113524	-0.500156	-0.744001	-0.647242	0.348416	-0.232912	-0.880941	-0.106788	-0.460584	0.451671	-0.197746	0.316889	0.0566752	-0.540796	0.0062648	-0.379057	0.0201625	-0.280395	-0.471868	0.973301	-0.714994	-0.258457
-4.24306	1.2944	-0.35176	-0.745328	-0.406473	-0.252689	0.575738	-0.731751	-0.589703	0.0340318	0.795163	-0.324921	-0.184926	-0.025401	0.173597	0.446599	-0.0849287	-0.402473	-0.29557	-0.243948	0.598561	0.65738	-0.187763	-0.0354961	-0.242958	-0.419032	0.20815	-0.499001	0.11446	-0.499446	-0.743664	-0.648128	0.352255	-0.235138	-0.880437	-0.106357	-0.461238	0.451754	-0.196526	0.317781	0.0560266	-0.5382	0.010071	-0.379556	0.0216834	-0.280272	-0.47215	0.97054	-0.715661	-0.258872
-4.24208	1.29435	-0.347789	-0.746379	-0.406807	-0.25142	0.575942	-0.728466	-0.591698	0.0337611	0.798626	-0.32558	-0.183946	-0.0237166	0.177343	0.448331	-0.0834909	-0.401329	-0.296388	-0.246282	0.598882	0.658593	-0.188779	-0.0365113	-0.240373	-0.419969	0.207626	-0.499719	0.115381	-0.49873	-0.743327	-0.649002	0.356108	-0.237362	-0.879938	-0.10592	-0.461889	0.451849	-0.195302	0.318653	0.0553536	-0.535599	0.0138799	-0.380067	0.0232137	-0.280147	-0.472415	0.967778	-0.71632	-0.259285
-4.24109	1.29428	-0.343802	-0.747415	-0.407144	-0.250144	0.576149	-0.725155	-0.593682	0.0335043	0.802113	-0.326221	-0.182971	-0.0220455	0.181087	0.450055	-0.0820542	-0.400169	-0.297208	-0.248626	0.599186	0.659782	-0.189786	-0.0375378	-0.237786	-0.420902	0.207091	-0.500417	0.116287	-0.498008	-0.74299	-0.649864	0.359974	-0.239583	-0.879445	-0.105479	-0.462535	0.451957	-0.194074	0.319505	0.0546563	-0.532992	0.0176914	-0.380591	0.0247534	-0.28002	-0.472662	0.965016	-0.71697	-0.259698
-4.24011	1.29421	-0.339801	-0.748438	-0.407484	-0.248861	0.576359	-0.721818	-0.595655	0.0332613	0.805623	-0.326842	-0.182002	-0.0203879	0.184829	0.451771	-0.0806187	-0.398992	-0.298028	-0.250981	0.599473	0.660949	-0.190784	-0.0385753	-0.235196	-0.421833	0.206548	-0.501094	0.117177	-0.497282	-0.742654	-0.650714	0.363853	-0.241801	-0.878957	-0.105033	-0.463178	0.452076	-0.192841	0.320336	0.0539349	-0.530381	0.0215055	-0.381127	0.0263023	-0.279889	-0.472891	0.962254	-0.717611	-0.260109
-4.23913	1.29412	-0.335785	-0.749448	-0.407828	-0.247572	0.576573	-0.718456	-0.597617	0.0330322	0.809156	-0.327445	-0.181038	-0.0187442	0.188569	0.453479	-0.0791844	-0.397799	-0.298849	-0.253345	0.599744	0.662093	-0.191774	-0.0396238	-0.232604	-0.42276	0.205995	-0.501751	0.118051	-0.496549	-0.742319	-0.651551	0.367745	-0.244017	-0.878475	-0.104581	-0.463816	0.452208	-0.191604	0.321147	0.0531896	-0.527764	0.0253218	-0.381675	0.0278604	-0.279756	-0.473103	0.959492	-0.718243	-0.260519
-4.23814	1.29403	-0.331755	-0.750443	-0.408176	-0.246277	0.57679	-0.715069	-0.599567	0.032817	0.812713	-0.328028	-0.180081	-0.0171144	0.192307	0.455178	-0.0777513	-0.396589	-0.299672	-0.255719	0.599999	0.663213	-0.192754	-0.0406834	-0.230011	-0.423684	0.205433	-0.502387	0.11891	-0.495812	-0.741984	-0.652376	0.371649	-0.246229	-0.877999	-0.104125	-0.46445	0.452351	-0.190364	0.321936	0.0524205	-0.525143	0.0291404	-0.382236	0.0294276	-0.27962	-0.473297	0.95673	-0.718865	-0.260928
-4.23716	1.29392	-0.327711	-0.751425	-0.408527	-0.244975	0.577011	-0.711657	-0.601506	0.0326156	0.816293	-0.328592	-0.179129	-0.0154988	0.196042	0.456868	-0.0763194	-0.395362	-0.300495	-0.258103	0.600237	0.66431	-0.193725	-0.0417537	-0.227415	-0.424605	0.204862	-0.503003	0.119754	-0.495068	-0.741649	-0.65319	0.375566	-0.248438	-0.877529	-0.103664	-0.465079	0.452506	-0.189119	0.322704	0.0516277	-0.522517	0.032961	-0.382809	0.031004	-0.27948	-0.473473	0.95397	-0.719479	-0.261336
-4.23618	1.29381	-0.323653	-0.752393	-0.408882	-0.243666	0.577236	-0.70822	-0.603432	0.0324282	0.819895	-0.329138	-0.178182	-0.0138976	0.199774	0.458548	-0.0748887	-0.39412	-0.301319	-0.260495	0.600459	0.665383	-0.194688	-0.0428349	-0.224818	-0.425524	0.204282	-0.503598	0.120582	-0.49432	-0.741316	-0.653991	0.379494	-0.250644	-0.877065	-0.103198	-0.465704	0.452671	-0.187871	0.323452	0.0508113	-0.519886	0.0367835	-0.383395	0.0325895	-0.279338	-0.473631	0.951211	-0.720083	-0.261743
-4.23519	1.29368	-0.319582	-0.753348	-0.409241	-0.242352	0.577463	-0.704758	-0.605347	0.0322546	0.82352	-0.329664	-0.177242	-0.0123111	0.203504	0.460219	-0.0734593	-0.392861	-0.302145	-0.262896	0.600664	0.666432	-0.195641	-0.0439268	-0.222219	-0.426439	0.203692	-0.504172	0.121395	-0.493565	-0.740984	-0.65478	0.383435	-0.252846	-0.876606	-0.102727	-0.466324	0.452849	-0.186619	0.324177	0.0499715	-0.517251	0.0406078	-0.383993	0.0341841	-0.279193	-0.473772	0.948453	-0.720677	-0.262149
-4.23421	1.29354	-0.315497	-0.754289	-0.409604	-0.241031	0.577694	-0.701273	-0.607249	0.032095	0.827167	-0.330171	-0.176308	-0.0107394	0.20723	0.461881	-0.0720311	-0.391586	-0.302971	-0.265306	0.600852	0.667457	-0.196586	-0.0450292	-0.21962	-0.427352	0.203094	-0.504726	0.122192	-0.492805	-0.740652	-0.655558	0.387386	-0.255046	-0.876154	-0.102252	-0.466939	0.453037	-0.185364	0.324882	0.0491085	-0.514612	0.0444337	-0.384603	0.0357876	-0.279044	-0.473894	0.945698	-0.721262	-0.262554
-4.23323	1.29339	-0.311398	-0.755216	-0.409971	-0.239703	0.577928	-0.697763	-0.609138	0.0319493	0.830836	-0.330659	-0.17538	-0.00918283	0.210953	0.463533	-0.0706042	-0.390295	-0.303798	-0.267724	0.601024	0.668458	-0.197521	-0.0461423	-0.217019	-0.428261	0.202487	-0.505259	0.122973	-0.49204	-0.740322	-0.656324	0.391349	-0.257242	-0.875707	-0.101772	-0.46755	0.453235	-0.184105	0.325565	0.0482224	-0.511969	0.048261	-0.385226	0.0374	-0.278892	-0.473999	0.942945	-0.721836	-0.262958
-4.23225	1.29323	-0.307287	-0.75613	-0.410342	-0.23837	0.578166	-0.69423	-0.611015	0.0318176	0.834527	-0.331127	-0.174458	-0.00764149	0.214673	0.465174	-0.0691785	-0.388988	-0.304626	-0.27015	0.601179	0.669434	-0.198448	-0.0472657	-0.214417	-0.429168	0.201871	-0.505771	0.123739	-0.491269	-0.739994	-0.657079	0.395323	-0.259434	-0.875267	-0.101287	-0.468155	0.453445	-0.182843	0.326226	0.0473134	-0.509323	0.0520897	-0.385861	0.0390213	-0.278737	-0.474085	0.940194	-0.722402	-0.263362
-4.23126	1.29306	-0.303163	-0.757031	-0.410717	-0.237029	0.578407	-0.690674	-0.612878	0.0316997	0.838239	-0.331577	-0.173543	-0.00611562	0.218388	0.466806	-0.0677542	-0.387665	-0.305454	-0.272584	0.601317	0.670386	-0.199366	-0.0483995	-0.211814	-0.430071	0.201247	-0.506263	0.124489	-0.490492	-0.739666	-0.657822	0.399307	-0.261623	-0.874832	-0.100797	-0.468756	0.453664	-0.181577	0.326865	0.0463817	-0.506673	0.0559196	-0.386508	0.0406514	-0.278579	-0.474153	0.937447	-0.722957	-0.263765
-4.23028	1.29287	-0.299026	-0.757918	-0.411097	-0.235683	0.578651	-0.687095	-0.614729	0.0315959	0.841972	-0.332007	-0.172633	-0.0046054	0.2221	0.468427	-0.0663311	-0.386326	-0.306284	-0.275025	0.601438	0.671313	-0.200274	-0.0495436	-0.209211	-0.430972	0.200614	-0.506735	0.125223	-0.48971	-0.739341	-0.658553	0.403302	-0.263808	-0.874404	-0.100303	-0.469351	0.453894	-0.180309	0.327482	0.0454273	-0.504019	0.0597505	-0.387167	0.0422903	-0.278417	-0.474203	0.934703	-0.723502	-0.264167
-4.2293	1.29268	-0.294877	-0.758792	-0.41148	-0.23433	0.578898	-0.683493	-0.616567	0.0315059	0.845727	-0.332418	-0.17173	-0.00311104	0.225807	0.470037	-0.0649094	-0.384972	-0.307114	-0.277474	0.601543	0.672216	-0.201174	-0.0506979	-0.206608	-0.43187	0.199972	-0.507186	0.125942	-0.488922	-0.739017	-0.659274	0.407306	-0.26599	-0.873981	-0.0998045	-0.469941	0.454134	-0.179038	0.328078	0.0444505	-0.501363	0.0635823	-0.387839	0.0439379	-0.278251	-0.474235	0.931962	-0.724036	-0.264569
-4.22831	1.29247	-0.290716	-0.759652	-0.411868	-0.232971	0.579148	-0.679868	-0.61839	0.0314299	0.849501	-0.332809	-0.170834	-0.00163272	0.22951	0.471636	-0.063489	-0.383602	-0.307945	-0.279929	0.601631	0.673093	-0.202065	-0.0518623	-0.204005	-0.432765	0.199322	-0.507616	0.126645	-0.488129	-0.738694	-0.659983	0.41132	-0.268167	-0.873565	-0.0993012	-0.470525	0.454384	-0.177764	0.328651	0.0434514	-0.498703	0.0674148	-0.388523	0.0455941	-0.278082	-0.474249	0.929226	-0.724561	-0.264971
-4.22733	1.29226	-0.286543	-0.760499	-0.41226	-0.231606	0.579402	-0.676221	-0.620201	0.0313679	0.853297	-0.333182	-0.169944	-0.000170618	0.233208	0.473224	-0.0620698	-0.382217	-0.308776	-0.282391	0.601702	0.673946	-0.202948	-0.0530366	-0.201401	-0.433657	0.198663	-0.508026	0.127332	-0.48733	-0.738374	-0.660681	0.415344	-0.270341	-0.873155	-0.0987935	-0.471104	0.454644	-0.176487	0.329201	0.0424303	-0.496041	0.0712479	-0.38922	0.047259	-0.277909	-0.474245	0.926494	-0.725075	-0.265372
-4.22635	1.29203	-0.282358	-0.761332	-0.412657	-0.230234	0.579658	-0.672552	-0.621997	0.0313198	0.857112	-0.333535	-0.16906	0.00127507	0.236902	0.474801	-0.060652	-0.380817	-0.309609	-0.28486	0.601756	0.674773	-0.203821	-0.0542209	-0.198797	-0.434546	0.197995	-0.508415	0.128003	-0.486525	-0.738055	-0.661368	0.419377	-0.272511	-0.872752	-0.0982813	-0.471678	0.454912	-0.175207	0.32973	0.0413872	-0.493376	0.0750815	-0.389928	0.0489324	-0.277732	-0.474222	0.923767	-0.725578	-0.265773
-4.22536	1.29179	-0.278162	-0.762152	-0.413058	-0.228857	0.579918	-0.668862	-0.623779	0.0312857	0.860947	-0.333869	-0.168183	0.00270418	0.24059	0.476366	-0.0592356	-0.379401	-0.310442	-0.287334	0.601793	0.675575	-0.204685	-0.055415	-0.196194	-0.435432	0.19732	-0.508784	0.128659	-0.485715	-0.737739	-0.662044	0.423418	-0.274677	-0.872354	-0.0977647	-0.472245	0.45519	-0.173925	0.330236	0.0403224	-0.490709	0.0789154	-0.390649	0.0506142	-0.277552	-0.474181	0.921044	-0.726071	-0.266173
-4.22438	1.29154	-0.273954	-0.762959	-0.413464	-0.227473	0.580181	-0.66515	-0.625548	0.0312655	0.864802	-0.334183	-0.167312	0.00411653	0.244274	0.477919	-0.0578205	-0.377971	-0.311275	-0.289815	0.601813	0.676352	-0.205541	-0.0566187	-0.193592	-0.436315	0.196636	-0.509132	0.129299	-0.484899	-0.737424	-0.662709	0.427468	-0.276838	-0.871963	-0.0972437	-0.472807	0.455478	-0.172641	0.330719	0.039236	-0.488039	0.0827494	-0.391382	0.0523044	-0.277367	-0.474122	0.918327	-0.726554	-0.266573
-4.2234	1.29128	-0.269736	-0.763753	-0.413874	-0.226083	0.580446	-0.661417	-0.627301	0.0312592	0.868676	-0.334478	-0.166449	0.00551195	0.247952	0.47946	-0.0564067	-0.376525	-0.312109	-0.292301	0.601817	0.677102	-0.206388	-0.0578322	-0.190989	-0.437196	0.195944	-0.50946	0.129922	-0.484077	-0.737112	-0.663363	0.431526	-0.278996	-0.871578	-0.0967184	-0.473363	0.455773	-0.171354	0.331179	0.0381283	-0.485367	0.0865835	-0.392128	0.054003	-0.277179	-0.474045	0.915616	-0.727025	-0.266973
-4.22242	1.291	-0.265507	-0.764533	-0.414289	-0.224687	0.580715	-0.657664	-0.629041	0.0312668	0.872569	-0.334754	-0.165592	0.00689028	0.251624	0.480989	-0.0549943	-0.375064	-0.312944	-0.294792	0.601803	0.677827	-0.207226	-0.0590551	-0.188388	-0.438074	0.195243	-0.509768	0.13053	-0.48325	-0.736802	-0.664007	0.435592	-0.281149	-0.871199	-0.0961888	-0.473914	0.456078	-0.170066	0.331617	0.0369994	-0.482694	0.0904174	-0.392885	0.0557098	-0.276986	-0.473949	0.91291	-0.727486	-0.267373
-4.22143	1.29072	-0.261267	-0.765301	-0.414708	-0.223284	0.580987	-0.653889	-0.630765	0.0312884	0.876481	-0.33501	-0.164741	0.00825135	0.25529	0.482505	-0.0535832	-0.373589	-0.313779	-0.297289	0.601772	0.678527	-0.208055	-0.0602875	-0.185788	-0.438949	0.194535	-0.510055	0.131122	-0.482418	-0.736495	-0.66464	0.439666	-0.283298	-0.870827	-0.095655	-0.474458	0.456391	-0.168775	0.332032	0.0358495	-0.480019	0.094251	-0.393655	0.0574249	-0.276789	-0.473834	0.910211	-0.727935	-0.267774
-4.22045	1.29042	-0.257017	-0.766055	-0.415133	-0.221876	0.581261	-0.650095	-0.632475	0.0313238	0.880411	-0.335248	-0.163898	0.00959501	0.25895	0.484009	-0.0521735	-0.372099	-0.314615	-0.29979	0.601725	0.6792	-0.208876	-0.0615292	-0.183189	-0.439821	0.193818	-0.510322	0.131698	-0.481579	-0.73619	-0.665263	0.443747	-0.285442	-0.870461	-0.095117	-0.474996	0.456712	-0.167482	0.332424	0.0346789	-0.477342	0.0980843	-0.394436	0.0591481	-0.276588	-0.473702	0.907519	-0.728374	-0.268174
-4.21947	1.29011	-0.252756	-0.766796	-0.415562	-0.220461	0.581538	-0.646281	-0.63417	0.0313732	0.884359	-0.335465	-0.163061	0.0109211	0.262604	0.4855	-0.0507651	-0.370595	-0.315451	-0.302296	0.60166	0.679847	-0.209688	-0.0627802	-0.180591	-0.44069	0.193094	-0.510569	0.132258	-0.480735	-0.735888	-0.665875	0.447835	-0.287582	-0.870101	-0.0945749	-0.475527	0.457041	-0.166188	0.332793	0.0334876	-0.474664	0.101917	-0.39523	0.0608794	-0.276383	-0.473551	0.904833	-0.728801	-0.268574
-4.21848	1.28979	-0.248486	-0.767524	-0.415996	-0.219041	0.581819	-0.642448	-0.635849	0.0314364	0.888325	-0.335664	-0.162231	0.0122295	0.266252	0.486977	-0.0493581	-0.369076	-0.316288	-0.304806	0.601578	0.680468	-0.210491	-0.0640402	-0.177994	-0.441557	0.192361	-0.510795	0.132803	-0.479886	-0.735589	-0.666477	0.451929	-0.289717	-0.869748	-0.0940287	-0.476053	0.457378	-0.164892	0.333139	0.0322759	-0.471985	0.105749	-0.396036	0.0626186	-0.276173	-0.473381	0.902155	-0.729217	-0.268974
-4.2175	1.28946	-0.244206	-0.768239	-0.416435	-0.217614	0.582101	-0.638595	-0.637514	0.0315135	0.892308	-0.335843	-0.161408	0.01352	0.269893	0.488442	-0.0479525	-0.367543	-0.317125	-0.307319	0.60148	0.681062	-0.211286	-0.0653094	-0.175399	-0.44242	0.191621	-0.511002	0.133331	-0.479031	-0.735293	-0.667069	0.45603	-0.291848	-0.869401	-0.0934785	-0.476572	0.457723	-0.163595	0.333461	0.031044	-0.469305	0.10958	-0.396854	0.0643658	-0.275959	-0.473193	0.899484	-0.729622	-0.269375
-4.21652	1.28912	-0.239917	-0.768942	-0.416879	-0.216182	0.582387	-0.634723	-0.639163	0.0316045	0.896309	-0.336003	-0.160592	0.0147925	0.273527	0.489893	-0.0465482	-0.365995	-0.317962	-0.309837	0.601364	0.68163	-0.212071	-0.0665874	-0.172806	-0.443281	0.190873	-0.511188	0.133843	-0.47817	-0.734999	-0.667651	0.460137	-0.293973	-0.869061	-0.0929243	-0.477085	0.458075	-0.162296	0.333761	0.0297921	-0.466624	0.11341	-0.397684	0.0661208	-0.27574	-0.472987	0.896821	-0.730015	-0.269776
-4.21553	1.28876	-0.235619	-0.769631	-0.417329	-0.214743	0.582676	-0.630833	-0.640796	0.0317093	0.900327	-0.336143	-0.159783	0.0160469	0.277154	0.49133	-0.0451452	-0.364434	-0.3188	-0.312358	0.601231	0.682172	-0.212849	-0.0678743	-0.170215	-0.44414	0.190117	-0.511354	0.134339	-0.477304	-0.734709	-0.668223	0.46425	-0.296094	-0.868727	-0.0923661	-0.477591	0.458435	-0.160995	0.334036	0.0285205	-0.463943	0.117239	-0.398526	0.0678837	-0.275516	-0.472762	0.894166	-0.730396	-0.270178
-4.21455	1.2884	-0.231312	-0.770307	-0.417783	-0.213299	0.582967	-0.626924	-0.642413	0.0318279	0.904361	-0.336264	-0.158981	0.017283	0.280773	0.492753	-0.0437437	-0.362859	-0.319638	-0.314883	0.601081	0.682687	-0.213617	-0.0691699	-0.167626	-0.444995	0.189354	-0.5115	0.134819	-0.476432	-0.734422	-0.668785	0.468367	-0.29821	-0.8684	-0.0918041	-0.47809	0.458801	-0.159694	0.334289	0.0272293	-0.461261	0.121067	-0.39938	0.0696542	-0.275288	-0.472519	0.891519	-0.730766	-0.27058
-4.21357	1.28802	-0.226996	-0.770971	-0.418242	-0.211849	0.58326	-0.622997	-0.644015	0.0319603	0.908411	-0.336366	-0.158187	0.0185006	0.284386	0.494162	-0.0423435	-0.36127	-0.320477	-0.31741	0.600914	0.683175	-0.214377	-0.0704742	-0.165039	-0.445848	0.188582	-0.511626	0.135283	-0.475555	-0.734138	-0.669337	0.47249	-0.30032	-0.868079	-0.0912382	-0.478583	0.459174	-0.158391	0.334518	0.0259187	-0.458579	0.124893	-0.400245	0.0714324	-0.275055	-0.472258	0.888881	-0.731125	-0.270982
-4.21258	1.28763	-0.222672	-0.771622	-0.418707	-0.210393	0.583557	-0.619053	-0.6456	0.0321064	0.912478	-0.336448	-0.157399	0.0196998	0.28799	0.495557	-0.0409446	-0.359668	-0.321315	-0.31994	0.60073	0.683636	-0.215129	-0.0717869	-0.162454	-0.446698	0.187804	-0.511732	0.135732	-0.474672	-0.733857	-0.66988	0.476618	-0.302426	-0.867764	-0.0906686	-0.479069	0.459553	-0.157088	0.334723	0.0245889	-0.455897	0.128718	-0.401123	0.0732181	-0.274817	-0.471978	0.886252	-0.731471	-0.271385
-4.2116	1.28722	-0.218339	-0.77226	-0.419177	-0.208931	0.583855	-0.615091	-0.647169	0.0322663	0.91656	-0.336511	-0.156618	0.0208803	0.291587	0.496937	-0.0395472	-0.358052	-0.322154	-0.322472	0.600529	0.68407	-0.215872	-0.0731081	-0.159872	-0.447545	0.187017	-0.511818	0.136164	-0.473784	-0.73358	-0.670413	0.48075	-0.304526	-0.867456	-0.0900952	-0.479548	0.459939	-0.155784	0.334905	0.0232402	-0.453216	0.132541	-0.402013	0.0750113	-0.274574	-0.47168	0.883633	-0.731806	-0.271789
-4.21062	1.28681	-0.213999	-0.772885	-0.419652	-0.207464	0.584157	-0.611113	-0.648722	0.0324399	0.920657	-0.336555	-0.155845	0.022042	0.295176	0.498303	-0.038151	-0.356422	-0.322993	-0.325006	0.600311	0.684477	-0.216606	-0.0744376	-0.157293	-0.448389	0.186223	-0.511884	0.13658	-0.472891	-0.733306	-0.670937	0.484886	-0.306621	-0.867155	-0.0895181	-0.48002	0.460332	-0.154479	0.335064	0.0218728	-0.450534	0.136362	-0.402914	0.0768118	-0.274327	-0.471363	0.881023	-0.732129	-0.272194
-4.20964	1.28638	-0.209651	-0.773498	-0.420132	-0.205991	0.584461	-0.607118	-0.650259	0.0326273	0.92477	-0.33658	-0.155079	0.0231849	0.298756	0.499654	-0.0367562	-0.35478	-0.323833	-0.327543	0.600075	0.684857	-0.217332	-0.0757753	-0.154717	-0.449231	0.185422	-0.51193	0.136979	-0.471992	-0.733036	-0.671452	0.489026	-0.308711	-0.86686	-0.0889374	-0.480486	0.46073	-0.153173	0.335198	0.020487	-0.447854	0.140181	-0.403827	0.0786197	-0.274073	-0.471028	0.878423	-0.732439	-0.272599
-4.20865	1.28594	-0.205295	-0.774098	-0.420618	-0.204512	0.584767	-0.603106	-0.651779	0.0328283	0.928897	-0.336585	-0.15432	0.0243087	0.302328	0.500989	-0.0353628	-0.353124	-0.324672	-0.330081	0.599823	0.68521	-0.21805	-0.0771211	-0.152143	-0.45007	0.184614	-0.511957	0.137363	-0.471088	-0.73277	-0.671957	0.493169	-0.310795	-0.866571	-0.0883531	-0.480944	0.461134	-0.151867	0.335309	0.0190828	-0.445174	0.143998	-0.404752	0.0804349	-0.273815	-0.470675	0.875832	-0.732738	-0.273006
-4.20767	1.28549	-0.200933	-0.774686	-0.42111	-0.203027	0.585076	-0.599078	-0.653282	0.0330429	0.933039	-0.336571	-0.153568	0.0254135	0.305892	0.502309	-0.0339707	-0.351456	-0.325512	-0.33262	0.599554	0.685535	-0.218759	-0.0784749	-0.149573	-0.450907	0.183798	-0.511964	0.137731	-0.470178	-0.732507	-0.672453	0.497315	-0.312873	-0.866289	-0.0877653	-0.481395	0.461543	-0.150561	0.335396	0.0176606	-0.442495	0.147813	-0.405688	0.0822572	-0.273552	-0.470303	0.873253	-0.733024	-0.273413
-4.20669	1.28503	-0.196563	-0.775261	-0.421607	-0.201537	0.585387	-0.595035	-0.654768	0.0332711	0.937194	-0.336538	-0.152823	0.0264991	0.309446	0.503614	-0.0325799	-0.349775	-0.326352	-0.33516	0.599267	0.685833	-0.21946	-0.0798365	-0.147006	-0.451741	0.182975	-0.511951	0.138083	-0.469263	-0.732248	-0.672941	0.501464	-0.314946	-0.866014	-0.0871741	-0.481839	0.461958	-0.149254	0.335459	0.0162207	-0.439817	0.151625	-0.406636	0.0840865	-0.273283	-0.469913	0.870684	-0.733298	-0.273821
-4.2057	1.28455	-0.192187	-0.775823	-0.422109	-0.200042	0.5857	-0.590977	-0.656238	0.033513	0.941363	-0.336485	-0.152086	0.0275653	0.312992	0.504903	-0.0311905	-0.348081	-0.327192	-0.337702	0.598964	0.686104	-0.220152	-0.081206	-0.144442	-0.452572	0.182144	-0.511919	0.138418	-0.468343	-0.731994	-0.673419	0.505616	-0.317013	-0.865745	-0.0865794	-0.482275	0.462377	-0.147948	0.335499	0.0147631	-0.43714	0.155435	-0.407596	0.0859229	-0.273009	-0.469505	0.868126	-0.73356	-0.274231
-4.20472	1.28407	-0.187804	-0.776373	-0.422617	-0.198541	0.586016	-0.586903	-0.65769	0.0337683	0.945546	-0.336414	-0.151356	0.0286122	0.316529	0.506176	-0.0298024	-0.346374	-0.328032	-0.340243	0.598644	0.686347	-0.220837	-0.0825831	-0.141882	-0.4534	0.181307	-0.511867	0.138738	-0.467417	-0.731743	-0.673889	0.509769	-0.319074	-0.865483	-0.0859814	-0.482705	0.462802	-0.146641	0.335514	0.0132882	-0.434465	0.159242	-0.408567	0.0877661	-0.272729	-0.469078	0.865579	-0.73381	-0.274641
-4.20374	1.28357	-0.183415	-0.776911	-0.423131	-0.197034	0.586334	-0.582815	-0.659125	0.0340372	0.949742	-0.336323	-0.150633	0.0296396	0.320056	0.507433	-0.0284156	-0.344655	-0.328871	-0.342786	0.598306	0.686562	-0.221513	-0.0839677	-0.139325	-0.454226	0.180462	-0.511796	0.139041	-0.466486	-0.731497	-0.67435	0.513924	-0.321129	-0.865227	-0.0853801	-0.483127	0.463231	-0.145335	0.335506	0.0117962	-0.431792	0.163046	-0.40955	0.0896162	-0.272443	-0.468633	0.863044	-0.734046	-0.275053
-4.20275	1.28306	-0.17902	-0.777437	-0.42365	-0.195522	0.586654	-0.578713	-0.660543	0.0343196	0.95395	-0.336213	-0.149918	0.0306475	0.323573	0.508673	-0.0270301	-0.342924	-0.329711	-0.345328	0.597952	0.68675	-0.22218	-0.0853598	-0.136773	-0.455049	0.179611	-0.511705	0.139328	-0.46555	-0.731255	-0.674802	0.518081	-0.323178	-0.864978	-0.0847756	-0.483542	0.463665	-0.144028	0.335473	0.0102874	-0.429121	0.166847	-0.410544	0.091473	-0.272152	-0.46817	0.86052	-0.734271	-0.275466
-4.20177	1.28253	-0.17462	-0.77795	-0.424176	-0.194005	0.586977	-0.574596	-0.661944	0.0346154	0.958171	-0.336084	-0.14921	0.0316357	0.327081	0.509898	-0.0256459	-0.341181	-0.330551	-0.34787	0.59758	0.68691	-0.22284	-0.0867592	-0.134224	-0.45587	0.178752	-0.511595	0.139599	-0.464609	-0.731017	-0.675246	0.522238	-0.325221	-0.864736	-0.0841679	-0.483949	0.464103	-0.142722	0.335417	0.00876188	-0.426451	0.170645	-0.41155	0.0933364	-0.271855	-0.467689	0.858008	-0.734483	-0.275881
-4.20079	1.282	-0.170214	-0.778451	-0.424706	-0.192482	0.587301	-0.570466	-0.663327	0.0349246	0.962403	-0.335935	-0.148509	0.0326042	0.330579	0.511105	-0.024263	-0.339426	-0.331391	-0.350412	0.597192	0.687042	-0.223491	-0.0881658	-0.13168	-0.456687	0.177886	-0.511466	0.139854	-0.463663	-0.730783	-0.675682	0.526396	-0.327258	-0.8645	-0.0835571	-0.484348	0.464545	-0.141417	0.335336	0.00722002	-0.423784	0.17444	-0.412567	0.0952064	-0.271552	-0.46719	0.855509	-0.734682	-0.276296
[truncated: 14,445 more rows]
[truncated: 71 more columns]

## Sheet: Figure 7B Bottom
Time from Infusion Onset (s)	Unpaired: VTADA Activity Response (z-score)										Paired: VTADA Activity Response (z-score)
[truncated: 155 more rows]

[truncated: 3 more sheets: Figure 7B Inset, Figure 7C, Figure 7D]
