# Supplementary material for: Dopamine activity encodes the changing valence of the same stimulus in conditioned taste aversion paradigms
Source: eLife. 2025 Mar 5;13:RP103260. doi: 10.7554/eLife.103260 (PMC11882140; doi:10.7554/eLife.103260)
Supplement: Figure 8—source data 1. [file elife-103260-fig8-data1.xlsx]

## Sheet: Figure 8B
Time from infusion onset (s)	Unpaired: Conditioning Day 1: Dopamine Release to Sucrose infusion (z-score, averaged across subjects)																														Unpaired: Conditioning Day 2: Dopamine Release to Sucrose infusion (z-score, averaged across subjects)
	Trial																														Trial
	1	2	3	4	5	6	7	8	9	10	11	12	13	14	15	16	17	18	19	20	21	22	23	24	25	26	27	28	29	30	1	2	3	4	5	6	7	8	9	10	11	12	13	14	15	16	17	18	19
-5	-1.25313	1.04844	-0.171441	-0.38393	-0.306868	-0.00084142	-0.101172	-0.74951	0.11364	0.629425	-0.171433	-0.0944968	-0.309667	-0.216864	0.111014	-0.381496	-0.20746	0.296642	-0.267813	-0.804181	0.162486	-0.286687	-0.128393	0.4019	-0.531237	-0.272717	0.0848114	-0.156791	-0.0261369	-0.163899	-0.29148	0.296777	-0.101525	-0.904955	0.31147	-0.0477737	0.346065	0.178188	-0.751772	0.000957259	-0.542464	0.0395111	-0.246483	0.269636	-0.260265	-0.217455	-0.109604	-0.155314	0.0779554
-4.99902	-1.25376	1.05144	-0.17166	-0.383762	-0.306218	-0.000139798	-0.105196	-0.750049	0.113753	0.627161	-0.172092	-0.0946457	-0.30983	-0.215926	0.112303	-0.380448	-0.206437	0.296903	-0.268828	-0.804233	0.159753	-0.286523	-0.125701	0.400968	-0.531698	-0.272542	0.0845046	-0.157958	-0.0256671	-0.16219	-0.286202	0.299186	-0.101135	-0.905067	0.308844	-0.048821	0.34699	0.181386	-0.752039	-0.000388324	-0.543886	0.0404651	-0.245898	0.270299	-0.257705	-0.219039	-0.111496	-0.15777	0.0789976
-4.99803	-1.2544	1.05443	-0.17187	-0.383582	-0.305553	0.0005481	-0.109221	-0.750574	0.113852	0.624901	-0.172762	-0.0948201	-0.31	-0.214972	0.113588	-0.379417	-0.205405	0.297145	-0.269835	-0.804269	0.157023	-0.286372	-0.123007	0.400029	-0.532152	-0.272361	0.0841898	-0.159115	-0.0252017	-0.160482	-0.280892	0.301579	-0.100727	-0.905164	0.306227	-0.0498773	0.347916	0.184574	-0.75229	-0.00171648	-0.545307	0.0414178	-0.245316	0.270967	-0.255145	-0.220614	-0.113394	-0.160221	0.0800544
-4.99705	-1.25502	1.05741	-0.172072	-0.383391	-0.304873	0.00122239	-0.113248	-0.751084	0.113939	0.622646	-0.173441	-0.09502	-0.310178	-0.214002	0.114868	-0.378404	-0.204365	0.297366	-0.270833	-0.804287	0.154294	-0.286235	-0.12031	0.399082	-0.532599	-0.272176	0.0838671	-0.160261	-0.0247407	-0.158773	-0.275551	0.303955	-0.100301	-0.905246	0.303621	-0.0509424	0.348843	0.187753	-0.752525	-0.00302703	-0.546726	0.042369	-0.244735	0.27164	-0.252584	-0.222182	-0.115296	-0.162667	0.0811257
-4.99607	-1.25564	1.06039	-0.172265	-0.383189	-0.304177	0.00188319	-0.117274	-0.751578	0.114013	0.620395	-0.174131	-0.0952454	-0.310363	-0.213016	0.116141	-0.37741	-0.203316	0.297567	-0.271824	-0.804289	0.151567	-0.286112	-0.117612	0.398128	-0.533038	-0.271984	0.0835364	-0.161396	-0.024284	-0.157065	-0.27018	0.306314	-0.0998562	-0.905314	0.301025	-0.0520164	0.34977	0.190922	-0.752745	-0.00431979	-0.548143	0.0433187	-0.244155	0.272316	-0.250024	-0.22374	-0.117203	-0.165107	0.0822115
-4.99508	-1.25626	1.06337	-0.172449	-0.382976	-0.303468	0.00253062	-0.121301	-0.752057	0.114074	0.61815	-0.17483	-0.0954963	-0.310557	-0.212015	0.117409	-0.376433	-0.202259	0.297749	-0.272807	-0.804273	0.148843	-0.286002	-0.114911	0.397166	-0.53347	-0.271788	0.0831978	-0.16252	-0.0238317	-0.155356	-0.264777	0.308655	-0.0993935	-0.905366	0.29844	-0.0530992	0.350698	0.194082	-0.75295	-0.0055946	-0.549558	0.0442666	-0.243577	0.272997	-0.247464	-0.225291	-0.119115	-0.167542	0.0833115
-4.9941	-1.25687	1.06633	-0.172624	-0.382751	-0.302743	0.00316481	-0.125329	-0.75252	0.114123	0.61591	-0.17554	-0.0957726	-0.310759	-0.210999	0.118671	-0.375476	-0.201194	0.297912	-0.273781	-0.804241	0.14612	-0.285906	-0.112209	0.396198	-0.533895	-0.271585	0.0828511	-0.163633	-0.0233838	-0.153649	-0.259344	0.310978	-0.0989126	-0.905405	0.295865	-0.0541907	0.351626	0.19723	-0.753139	-0.00685128	-0.550971	0.0452126	-0.243	0.273682	-0.244904	-0.226832	-0.12103	-0.16997	0.0844259
-4.99312	-1.25748	1.06929	-0.172791	-0.382517	-0.302004	0.00378587	-0.129355	-0.752968	0.114158	0.613675	-0.176259	-0.0960744	-0.310969	-0.209967	0.119927	-0.374537	-0.20012	0.298054	-0.274748	-0.804193	0.1434	-0.285824	-0.109505	0.395223	-0.534312	-0.271377	0.0824963	-0.164735	-0.0229401	-0.151942	-0.253879	0.313284	-0.0984136	-0.905428	0.293301	-0.0552909	0.352554	0.200369	-0.753312	-0.00808967	-0.552382	0.0461565	-0.242425	0.274371	-0.242346	-0.228365	-0.12295	-0.172393	0.0855545
-4.99214	-1.25809	1.07224	-0.172949	-0.382271	-0.301251	0.00439395	-0.133381	-0.753399	0.114181	0.611446	-0.176988	-0.0964015	-0.311187	-0.208919	0.121176	-0.373617	-0.199038	0.298178	-0.275706	-0.804128	0.140683	-0.285756	-0.1068	0.394241	-0.534721	-0.271163	0.0821334	-0.165825	-0.0225007	-0.150236	-0.248385	0.31557	-0.0978964	-0.905437	0.290747	-0.0563997	0.353482	0.203496	-0.753469	-0.00930959	-0.55379	0.0470981	-0.241852	0.275065	-0.239788	-0.229888	-0.124874	-0.174809	0.0866971
-4.99115	-1.25869	1.07519	-0.173099	-0.382015	-0.300483	0.00498917	-0.137406	-0.753815	0.114192	0.609223	-0.177726	-0.0967539	-0.311413	-0.207857	0.122418	-0.372716	-0.197948	0.298282	-0.276656	-0.804046	0.137968	-0.285701	-0.104095	0.393253	-0.535123	-0.270944	0.0817623	-0.166904	-0.0220657	-0.148531	-0.242859	0.317838	-0.097361	-0.905432	0.288205	-0.0575171	0.354411	0.206613	-0.75361	-0.0105109	-0.555196	0.0480374	-0.24128	0.275764	-0.237231	-0.231403	-0.126801	-0.177219	0.0878538
-4.99017	-1.25928	1.07813	-0.17324	-0.381749	-0.299701	0.00557167	-0.14143	-0.754214	0.11419	0.607007	-0.178474	-0.0971316	-0.311649	-0.206779	0.123653	-0.371834	-0.19685	0.298367	-0.277598	-0.803948	0.135256	-0.285659	-0.101389	0.392258	-0.535518	-0.270718	0.081383	-0.167971	-0.0216349	-0.146827	-0.237303	0.320087	-0.0968075	-0.905412	0.285675	-0.0586431	0.355339	0.209718	-0.753735	-0.0116934	-0.556599	0.0489741	-0.24071	0.276467	-0.234676	-0.232909	-0.128732	-0.179623	0.0890244
-4.98919	-1.25988	1.08106	-0.173372	-0.381472	-0.298906	0.00614159	-0.145452	-0.754596	0.114176	0.604796	-0.179232	-0.0975345	-0.311892	-0.205687	0.12488	-0.370972	-0.195744	0.298433	-0.278532	-0.803834	0.132547	-0.285631	-0.0986827	0.391258	-0.535904	-0.270486	0.0809954	-0.169025	-0.0212084	-0.145125	-0.231717	0.322316	-0.0962358	-0.905378	0.283155	-0.0597775	0.356267	0.212811	-0.753845	-0.012857	-0.557999	0.0499082	-0.240141	0.277175	-0.232122	-0.234406	-0.130666	-0.182019	0.0902089
-4.9882	-1.26046	1.08399	-0.173496	-0.381185	-0.298096	0.00669907	-0.149472	-0.754962	0.114149	0.602593	-0.179999	-0.0979627	-0.312145	-0.204579	0.1261	-0.370129	-0.19463	0.29848	-0.279458	-0.803704	0.129842	-0.285616	-0.0959764	0.390251	-0.536283	-0.270249	0.0805996	-0.170068	-0.0207861	-0.143424	-0.226101	0.324525	-0.0956461	-0.905329	0.280647	-0.0609203	0.357195	0.215893	-0.753938	-0.0140015	-0.559396	0.0508394	-0.239573	0.277888	-0.22957	-0.235893	-0.132604	-0.184409	0.0914071
-4.98722	-1.26105	1.08691	-0.173611	-0.380888	-0.297273	0.00724425	-0.153489	-0.75531	0.11411	0.600396	-0.180776	-0.0984159	-0.312407	-0.203456	0.127312	-0.369305	-0.193508	0.298508	-0.280376	-0.803558	0.127139	-0.285615	-0.0932705	0.389239	-0.536654	-0.270005	0.0801954	-0.171099	-0.0203681	-0.141725	-0.220455	0.326714	-0.0950383	-0.905267	0.278151	-0.0620714	0.358123	0.218963	-0.754015	-0.0151268	-0.56079	0.0517676	-0.239007	0.278606	-0.227019	-0.237371	-0.134545	-0.186792	0.092619
-4.98624	-1.26163	1.08983	-0.173717	-0.380582	-0.296436	0.00777729	-0.157504	-0.755642	0.114058	0.598206	-0.181562	-0.0988943	-0.312677	-0.202319	0.128516	-0.368501	-0.192378	0.298517	-0.281286	-0.803395	0.12444	-0.285626	-0.0905652	0.38822	-0.537017	-0.269754	0.0797829	-0.172117	-0.0199542	-0.140027	-0.214779	0.328883	-0.0944124	-0.90519	0.275667	-0.0632309	0.359051	0.22202	-0.754077	-0.0162328	-0.562181	0.0526927	-0.238443	0.279328	-0.224471	-0.23884	-0.136488	-0.189167	0.0938444
-4.98525	-1.2622	1.09273	-0.173815	-0.380265	-0.295585	0.00829832	-0.161516	-0.755956	0.113994	0.596024	-0.182357	-0.0993976	-0.312957	-0.201167	0.129711	-0.367718	-0.19124	0.298507	-0.282188	-0.803217	0.121745	-0.285652	-0.0878607	0.387197	-0.537373	-0.269498	0.079362	-0.173122	-0.0195446	-0.138332	-0.209073	0.33103	-0.0937684	-0.905099	0.273195	-0.0643985	0.359977	0.225065	-0.754122	-0.0173192	-0.563569	0.0536145	-0.23788	0.280056	-0.221926	-0.240299	-0.138434	-0.191535	0.0950834
-4.98427	-1.26277	1.09563	-0.173904	-0.379939	-0.294721	0.00880751	-0.165524	-0.756253	0.113918	0.593849	-0.183161	-0.0999258	-0.313246	-0.2	0.130898	-0.366954	-0.190094	0.29848	-0.283081	-0.803023	0.119054	-0.28569	-0.0851574	0.386168	-0.53772	-0.269235	0.0789326	-0.174115	-0.0191391	-0.13664	-0.203338	0.333157	-0.0931065	-0.904993	0.270735	-0.0655744	0.360904	0.228097	-0.754151	-0.0183859	-0.564952	0.0545328	-0.237318	0.280789	-0.219382	-0.241748	-0.140383	-0.193896	0.0963356
-4.98329	-1.26334	1.09853	-0.173985	-0.379603	-0.293844	0.00930501	-0.169529	-0.756533	0.11383	0.591682	-0.183975	-0.100479	-0.313544	-0.198819	0.132076	-0.36621	-0.18894	0.298433	-0.283967	-0.802813	0.116366	-0.285741	-0.0824555	0.385135	-0.53806	-0.268965	0.0784947	-0.175095	-0.0187378	-0.134949	-0.197573	0.335262	-0.0924266	-0.904874	0.268287	-0.0667584	0.361829	0.231116	-0.754163	-0.0194329	-0.566333	0.0554475	-0.236758	0.281527	-0.216842	-0.243188	-0.142334	-0.196249	0.0976012
-4.98231	-1.2639	1.10142	-0.174057	-0.379258	-0.292954	0.00979098	-0.17353	-0.756794	0.11373	0.589523	-0.184797	-0.101057	-0.313852	-0.197623	0.133245	-0.365486	-0.187779	0.298368	-0.284844	-0.802588	0.113682	-0.285805	-0.0797553	0.384096	-0.538391	-0.268689	0.0780483	-0.176062	-0.0183406	-0.133261	-0.191779	0.337345	-0.0917288	-0.904741	0.265852	-0.0679504	0.362754	0.234121	-0.75416	-0.0204599	-0.567709	0.0563586	-0.236199	0.28227	-0.214304	-0.244618	-0.144287	-0.198594	0.0988799
-4.98132	-1.26446	1.1043	-0.174121	-0.378904	-0.292051	0.0102656	-0.177527	-0.757038	0.113618	0.587372	-0.185628	-0.101659	-0.314169	-0.196413	0.134405	-0.364783	-0.18661	0.298285	-0.285714	-0.802347	0.111003	-0.285883	-0.0770571	0.383053	-0.538715	-0.268405	0.0775933	-0.177016	-0.0179476	-0.131577	-0.185956	0.339407	-0.0910131	-0.904594	0.263429	-0.0691504	0.363678	0.237113	-0.75414	-0.021467	-0.569081	0.0572657	-0.235642	0.283018	-0.211769	-0.246038	-0.146242	-0.200931	0.100172
-4.98034	-1.26501	1.10717	-0.174176	-0.378541	-0.291135	0.010729	-0.181519	-0.757263	0.113495	0.585229	-0.186468	-0.102287	-0.314496	-0.195188	0.135555	-0.3641	-0.185434	0.298184	-0.286575	-0.802091	0.108328	-0.285973	-0.0743612	0.382005	-0.53903	-0.268116	0.0771297	-0.177956	-0.0175586	-0.129895	-0.180104	0.341446	-0.0902795	-0.904433	0.261019	-0.0703583	0.364601	0.240091	-0.754103	-0.0224538	-0.57045	0.0581689	-0.235086	0.283772	-0.209238	-0.247448	-0.148199	-0.203259	0.101476
-4.97936	-1.26557	1.11004	-0.174222	-0.378168	-0.290207	0.0111813	-0.185506	-0.757471	0.113359	0.583096	-0.187317	-0.102938	-0.314833	-0.19395	0.136695	-0.363438	-0.18425	0.298065	-0.287428	-0.801819	0.105658	-0.286076	-0.0716678	0.380953	-0.539338	-0.267819	0.0766575	-0.178883	-0.0171738	-0.128216	-0.174224	0.343462	-0.0895282	-0.904258	0.258622	-0.0715741	0.365522	0.243055	-0.754051	-0.0234204	-0.571814	0.0590679	-0.234532	0.284531	-0.206711	-0.248849	-0.150158	-0.20558	0.102794
-4.97837	-1.26611	1.11291	-0.17426	-0.377787	-0.289266	0.0116228	-0.189488	-0.75766	0.113211	0.58097	-0.188175	-0.103614	-0.315179	-0.192697	0.137825	-0.362796	-0.183058	0.297929	-0.288273	-0.801533	0.102992	-0.286192	-0.0689772	0.379897	-0.539637	-0.267515	0.0761765	-0.179797	-0.0167929	-0.12654	-0.168314	0.345455	-0.088759	-0.90407	0.256238	-0.0727977	0.366443	0.246005	-0.753982	-0.0243666	-0.573174	0.0599626	-0.233979	0.285296	-0.204187	-0.250239	-0.152118	-0.207891	0.104124
-4.97739	-1.26666	1.11576	-0.174289	-0.377397	-0.288312	0.0120536	-0.193465	-0.75783	0.113052	0.578854	-0.18904	-0.104315	-0.315536	-0.191431	0.138945	-0.362176	-0.18186	0.297774	-0.28911	-0.801231	0.100331	-0.28632	-0.0662898	0.378837	-0.539929	-0.267204	0.0756869	-0.180697	-0.0164162	-0.124868	-0.162376	0.347425	-0.0879722	-0.903867	0.253867	-0.0740291	0.367362	0.24894	-0.753896	-0.0252922	-0.574529	0.0608528	-0.233427	0.286066	-0.201666	-0.251619	-0.154079	-0.210194	0.105467
-4.97641	-1.2672	1.11861	-0.17431	-0.376999	-0.287346	0.0124738	-0.197435	-0.757982	0.112882	0.576748	-0.189915	-0.10504	-0.315903	-0.190151	0.140054	-0.361576	-0.180654	0.297602	-0.289939	-0.800914	0.097675	-0.286461	-0.0636057	0.377773	-0.540212	-0.266887	0.0751885	-0.181583	-0.0160434	-0.1232	-0.15641	0.349371	-0.0871677	-0.903652	0.251509	-0.0752681	0.36828	0.251861	-0.753794	-0.0261973	-0.57588	0.0617386	-0.232876	0.286842	-0.19915	-0.252988	-0.156041	-0.212489	0.106823
-4.97542	-1.26773	1.12145	-0.174323	-0.376592	-0.286369	0.0128837	-0.2014	-0.758115	0.1127	0.57465	-0.190798	-0.105788	-0.31628	-0.188857	0.141152	-0.360997	-0.17944	0.297412	-0.29076	-0.800582	0.0950241	-0.286615	-0.0609253	0.376705	-0.540487	-0.266562	0.0746812	-0.182455	-0.0156746	-0.121536	-0.150416	0.351293	-0.0863456	-0.903422	0.249165	-0.0765147	0.369196	0.254767	-0.753675	-0.0270816	-0.577226	0.0626196	-0.232327	0.287624	-0.196639	-0.254348	-0.158004	-0.214774	0.108191
-4.97444	-1.26826	1.12429	-0.174327	-0.376177	-0.285379	0.0132834	-0.205358	-0.758229	0.112506	0.572562	-0.191689	-0.106561	-0.316667	-0.187549	0.142239	-0.36044	-0.17822	0.297205	-0.291573	-0.800236	0.0923785	-0.286781	-0.0582488	0.375635	-0.540754	-0.266229	0.0741651	-0.183313	-0.0153098	-0.119875	-0.144394	0.353191	-0.0855059	-0.90318	0.246835	-0.0777688	0.370111	0.257657	-0.75354	-0.0279451	-0.578567	0.0634957	-0.23178	0.288411	-0.194132	-0.255697	-0.159968	-0.21705	0.109571
-4.97346	-1.26879	1.12712	-0.174323	-0.375754	-0.284378	0.0136732	-0.209309	-0.758323	0.112302	0.570484	-0.192588	-0.107358	-0.317065	-0.186228	0.143315	-0.359904	-0.176992	0.296981	-0.292377	-0.799875	0.0897382	-0.286959	-0.0555766	0.374561	-0.541013	-0.26589	0.0736402	-0.184157	-0.014949	-0.118219	-0.138344	0.355064	-0.0846488	-0.902924	0.244518	-0.0790304	0.371024	0.260532	-0.753389	-0.0287877	-0.579903	0.064367	-0.231233	0.289204	-0.191629	-0.257035	-0.161932	-0.219317	0.110963
-4.97247	-1.26932	1.12995	-0.17431	-0.375323	-0.283365	0.0140531	-0.213254	-0.758399	0.112086	0.568416	-0.193495	-0.108178	-0.317473	-0.184894	0.144379	-0.359389	-0.175757	0.296739	-0.293173	-0.799499	0.0871035	-0.28715	-0.0529089	0.373484	-0.541264	-0.265543	0.0731063	-0.184986	-0.014592	-0.116567	-0.132266	0.356913	-0.0837742	-0.902654	0.242215	-0.0802994	0.371935	0.263391	-0.753221	-0.0296093	-0.581233	0.0652331	-0.230688	0.290002	-0.189132	-0.258363	-0.163896	-0.221574	0.112367
-4.97149	-1.26984	1.13277	-0.174288	-0.374884	-0.28234	0.0144234	-0.217191	-0.758455	0.111859	0.566358	-0.19441	-0.109023	-0.317892	-0.183547	0.145432	-0.358896	-0.174515	0.296481	-0.293962	-0.799109	0.0844744	-0.287353	-0.050246	0.372404	-0.541506	-0.265189	0.0725634	-0.185801	-0.014239	-0.11492	-0.126161	0.358736	-0.0828823	-0.902372	0.239926	-0.0815757	0.372845	0.266235	-0.753036	-0.0304098	-0.582559	0.066094	-0.230144	0.290807	-0.186639	-0.259681	-0.165861	-0.223822	0.113784
-4.97051	-1.27036	1.13558	-0.174259	-0.374437	-0.281304	0.0147843	-0.22112	-0.758492	0.111621	0.564311	-0.195333	-0.10989	-0.318321	-0.182186	0.146472	-0.358424	-0.173267	0.296205	-0.294742	-0.798704	0.0818512	-0.287568	-0.0475881	0.371322	-0.541741	-0.264827	0.0720116	-0.186601	-0.0138898	-0.113277	-0.12003	0.360534	-0.0819731	-0.902076	0.237651	-0.0828593	0.373752	0.269062	-0.752834	-0.0311891	-0.583879	0.0669495	-0.229602	0.291617	-0.184152	-0.260987	-0.167825	-0.22606	0.115212
-4.96953	-1.27087	1.13838	-0.174221	-0.373983	-0.280257	0.0151359	-0.225042	-0.758509	0.111372	0.562274	-0.196263	-0.110781	-0.318761	-0.180813	0.147501	-0.357973	-0.172011	0.295913	-0.295513	-0.798286	0.079234	-0.287795	-0.0449356	0.370238	-0.541967	-0.264457	0.0714507	-0.187386	-0.0135445	-0.111639	-0.113871	0.362306	-0.0810466	-0.901767	0.23539	-0.0841501	0.374657	0.271873	-0.752616	-0.0319471	-0.585194	0.0677996	-0.229061	0.292433	-0.181671	-0.262283	-0.169789	-0.228288	0.116651
-4.96854	-1.27138	1.14118	-0.174174	-0.373521	-0.2792	0.0154785	-0.228955	-0.758507	0.111112	0.560248	-0.197201	-0.111696	-0.319212	-0.179426	0.148517	-0.357545	-0.170749	0.295604	-0.296277	-0.797853	0.0766229	-0.288034	-0.0422887	0.369151	-0.542185	-0.26408	0.0708807	-0.188157	-0.013203	-0.110006	-0.107685	0.364052	-0.0801031	-0.901445	0.233144	-0.085448	0.37556	0.274667	-0.752382	-0.0326838	-0.586502	0.068644	-0.228521	0.293255	-0.179195	-0.263568	-0.171753	-0.230506	0.118102
-4.96756	-1.27189	1.14398	-0.17412	-0.373052	-0.278131	0.0158123	-0.23286	-0.758484	0.110842	0.558233	-0.198147	-0.112633	-0.319674	-0.178027	0.14952	-0.357138	-0.16948	0.295279	-0.297032	-0.797406	0.0740181	-0.288286	-0.0396477	0.368062	-0.542394	-0.263695	0.0703017	-0.188912	-0.0128653	-0.108379	-0.101473	0.365772	-0.0791424	-0.901111	0.230913	-0.0867529	0.376461	0.277445	-0.75213	-0.0333991	-0.587806	0.0694828	-0.227982	0.294084	-0.176725	-0.264843	-0.173716	-0.232714	0.119565
-4.96658	-1.2724	1.14676	-0.174057	-0.372577	-0.277051	0.0161374	-0.236756	-0.758442	0.110561	0.556229	-0.1991	-0.113594	-0.320147	-0.176616	0.15051	-0.356753	-0.168205	0.294938	-0.29778	-0.796945	0.0714197	-0.288548	-0.0370129	0.366972	-0.542596	-0.263302	0.0697134	-0.189653	-0.0125314	-0.106756	-0.0952341	0.367465	-0.0781648	-0.900763	0.228696	-0.0880648	0.377359	0.280206	-0.751863	-0.0340929	-0.589103	0.0703157	-0.227445	0.294918	-0.174261	-0.266106	-0.175678	-0.234911	0.121039
-4.96559	-1.2729	1.14955	-0.173985	-0.372094	-0.275961	0.016454	-0.240642	-0.75838	0.110269	0.554236	-0.20006	-0.114577	-0.320631	-0.175192	0.151487	-0.356391	-0.166923	0.29458	-0.298519	-0.796471	0.0688278	-0.288823	-0.0343845	0.36588	-0.542789	-0.262901	0.069116	-0.190378	-0.0122012	-0.10514	-0.0889694	0.369132	-0.0771703	-0.900403	0.226493	-0.0893836	0.378255	0.28295	-0.751578	-0.0347651	-0.590394	0.0711426	-0.226909	0.295758	-0.171804	-0.267358	-0.177639	-0.237098	0.122524
-4.96461	-1.2734	1.15232	-0.173906	-0.371604	-0.274861	0.0167624	-0.24452	-0.758297	0.109967	0.552255	-0.201027	-0.115583	-0.321127	-0.173756	0.152451	-0.35605	-0.165634	0.294206	-0.299249	-0.795983	0.0662426	-0.289109	-0.0317628	0.364787	-0.542974	-0.262493	0.0685094	-0.191088	-0.0118747	-0.103529	-0.0826787	0.370771	-0.0761589	-0.90003	0.224306	-0.0907093	0.379149	0.285676	-0.751277	-0.0354157	-0.591679	0.0719634	-0.226374	0.296605	-0.169353	-0.2686	-0.179599	-0.239275	0.12402
-4.96363	-1.27389	1.15509	-0.173818	-0.371108	-0.27375	0.0170628	-0.248388	-0.758195	0.109655	0.550286	-0.202002	-0.116612	-0.321633	-0.172308	0.153402	-0.355731	-0.164339	0.293816	-0.299972	-0.795481	0.0636642	-0.289406	-0.0291482	0.363692	-0.543151	-0.262076	0.0678934	-0.191782	-0.0115519	-0.101923	-0.0763624	0.372383	-0.0751308	-0.899644	0.222134	-0.0920417	0.380039	0.288384	-0.750959	-0.0360446	-0.592957	0.072778	-0.225841	0.297457	-0.166909	-0.26983	-0.181557	-0.24144	0.125527
-4.96264	-1.27439	1.15786	-0.173722	-0.370605	-0.27263	0.0173553	-0.252246	-0.758071	0.109333	0.548328	-0.202983	-0.117663	-0.322151	-0.170848	0.154338	-0.355435	-0.163038	0.293411	-0.300686	-0.794966	0.0610929	-0.289715	-0.0265408	0.362597	-0.54332	-0.261652	0.0672682	-0.192461	-0.0112327	-0.100324	-0.0700206	0.373967	-0.0740861	-0.899246	0.219977	-0.0933807	0.380927	0.291075	-0.750624	-0.0366518	-0.594229	0.0735864	-0.225308	0.298316	-0.164471	-0.271049	-0.183513	-0.243595	0.127044
-4.96166	-1.27487	1.16062	-0.173617	-0.370096	-0.271499	0.0176402	-0.256093	-0.757928	0.109001	0.546382	-0.203971	-0.118736	-0.322681	-0.169376	0.15526	-0.355161	-0.161731	0.292989	-0.301392	-0.794437	0.0585286	-0.290036	-0.023941	0.361501	-0.543481	-0.261219	0.0666337	-0.193124	-0.0109172	-0.0987312	-0.0636536	0.375524	-0.0730248	-0.898835	0.217835	-0.0947264	0.381812	0.293748	-0.750272	-0.0372372	-0.595495	0.0743883	-0.224777	0.299181	-0.162041	-0.272256	-0.185468	-0.245738	0.128572
-4.96068	-1.27536	1.16337	-0.173505	-0.369581	-0.270359	0.0179177	-0.25993	-0.757764	0.108659	0.544448	-0.204965	-0.119831	-0.323222	-0.167892	0.156169	-0.354909	-0.160417	0.292552	-0.302089	-0.793895	0.0559716	-0.290367	-0.021349	0.360404	-0.543633	-0.260778	0.0659898	-0.193771	-0.0106053	-0.0971445	-0.0572615	0.377052	-0.071947	-0.898412	0.215708	-0.0960786	0.382694	0.296403	-0.749904	-0.0378008	-0.596754	0.0751836	-0.224247	0.300052	-0.159618	-0.273453	-0.187421	-0.24787	0.130111
-4.9597	-1.27584	1.16612	-0.173384	-0.36906	-0.269209	0.018188	-0.263757	-0.757579	0.108307	0.542527	-0.205966	-0.120948	-0.323774	-0.166397	0.157062	-0.354679	-0.159098	0.2921	-0.302778	-0.793341	0.053422	-0.29071	-0.0187651	0.359307	-0.543778	-0.260329	0.0653365	-0.194402	-0.0102969	-0.0955643	-0.0508446	0.378551	-0.0708529	-0.897977	0.213598	-0.0974373	0.383573	0.299039	-0.74952	-0.0383425	-0.598006	0.0759723	-0.223719	0.30093	-0.157203	-0.274638	-0.189371	-0.249991	0.13166
-4.95871	-1.27633	1.16886	-0.173255	-0.368533	-0.26805	0.0184513	-0.267572	-0.757373	0.107945	0.540618	-0.206974	-0.122087	-0.324339	-0.164891	0.157942	-0.354472	-0.157772	0.291633	-0.303459	-0.792773	0.05088	-0.291064	-0.0161895	0.35821	-0.543914	-0.259872	0.0646737	-0.195017	-0.00999205	-0.0939907	-0.0444032	0.380022	-0.0697425	-0.89753	0.211502	-0.0988023	0.384449	0.301657	-0.749118	-0.0388624	-0.599251	0.0767542	-0.223191	0.301814	-0.154796	-0.275812	-0.191319	-0.252101	0.133219
-4.95773	-1.2768	1.1716	-0.173118	-0.368	-0.266882	0.0187079	-0.271376	-0.757147	0.107574	0.538722	-0.207987	-0.123248	-0.324915	-0.163373	0.158806	-0.354287	-0.156441	0.29115	-0.304132	-0.792192	0.0483456	-0.291428	-0.0136226	0.357112	-0.544042	-0.259406	0.0640015	-0.195616	-0.00969072	-0.092424	-0.0379375	0.381464	-0.068616	-0.897071	0.209423	-0.100174	0.385321	0.304256	-0.7487	-0.0393602	-0.600489	0.0775293	-0.222665	0.302704	-0.152396	-0.276974	-0.193264	-0.254198	0.134788
-4.95675	-1.27728	1.17433	-0.172972	-0.367462	-0.265705	0.0189579	-0.275169	-0.7569	0.107193	0.536839	-0.209007	-0.124429	-0.325502	-0.161845	0.159655	-0.354125	-0.155104	0.290652	-0.304796	-0.791599	0.045819	-0.291803	-0.0110646	0.356015	-0.544162	-0.258932	0.0633198	-0.196199	-0.00939285	-0.0908642	-0.0314477	0.382876	-0.0674733	-0.896599	0.207359	-0.101551	0.38619	0.306836	-0.748265	-0.0398361	-0.60172	0.0782974	-0.22214	0.3036	-0.150004	-0.278125	-0.195206	-0.256284	0.136367
-4.95576	-1.27775	1.17705	-0.172819	-0.366918	-0.264519	0.0192016	-0.27895	-0.756632	0.106803	0.534968	-0.210033	-0.125632	-0.326102	-0.160305	0.160489	-0.353986	-0.153761	0.29014	-0.305451	-0.790993	0.0433004	-0.292189	-0.00851577	0.354919	-0.544274	-0.25845	0.0626285	-0.196765	-0.00909843	-0.0893115	-0.024934	0.384259	-0.0663148	-0.896116	0.205312	-0.102935	0.387056	0.309397	-0.747813	-0.04029	-0.602944	0.0790584	-0.221616	0.304503	-0.147621	-0.279264	-0.197145	-0.258358	0.137955
-4.95478	-1.27822	1.17977	-0.172657	-0.366369	-0.263324	0.0194391	-0.282718	-0.756343	0.106404	0.533111	-0.211065	-0.126856	-0.326714	-0.158755	0.161307	-0.353869	-0.152412	0.289613	-0.306098	-0.790375	0.0407898	-0.292586	-0.00597638	0.353823	-0.544378	-0.257959	0.0619276	-0.197315	-0.0088074	-0.087766	-0.0183968	0.385613	-0.0651404	-0.895621	0.20328	-0.104325	0.387917	0.311938	-0.747345	-0.0407219	-0.60416	0.0798123	-0.221093	0.305412	-0.145246	-0.280392	-0.199081	-0.26042	0.139553
-4.9538	-1.27869	1.18249	-0.172488	-0.365815	-0.26212	0.0196709	-0.286475	-0.756033	0.105996	0.531267	-0.212102	-0.128101	-0.327337	-0.157195	0.16211	-0.353774	-0.151058	0.289071	-0.306737	-0.789744	0.0382875	-0.292993	-0.00344668	0.352728	-0.544474	-0.25746	0.0612172	-0.197848	-0.00851975	-0.086228	-0.0118363	0.386936	-0.0639502	-0.895114	0.201265	-0.10572	0.388776	0.31446	-0.74686	-0.0411317	-0.605369	0.0805589	-0.220571	0.306327	-0.14288	-0.281508	-0.201014	-0.26247	0.14116
-4.95281	-1.27915	1.1852	-0.17231	-0.365256	-0.260909	0.0198969	-0.290219	-0.755701	0.105579	0.529436	-0.213145	-0.129366	-0.327973	-0.155624	0.162897	-0.353703	-0.149699	0.288515	-0.307367	-0.789101	0.0357935	-0.293411	-0.000926953	0.351634	-0.544562	-0.256952	0.0604971	-0.198365	-0.00823544	-0.0846976	-0.00525264	0.388229	-0.0627444	-0.894596	0.199266	-0.107122	0.38963	0.316962	-0.746359	-0.0415194	-0.60657	0.0812981	-0.220051	0.307249	-0.140523	-0.282612	-0.202942	-0.264508	0.142777
-4.95183	-1.27962	1.18791	-0.172124	-0.364692	-0.259689	0.0201176	-0.293949	-0.755348	0.105153	0.527618	-0.214193	-0.130652	-0.328621	-0.154043	0.163668	-0.353654	-0.148334	0.287945	-0.307989	-0.788446	0.033308	-0.293838	0.00158254	0.350542	-0.544642	-0.256436	0.0597673	-0.198865	-0.00795442	-0.0831749	0.00135382	0.389492	-0.0615232	-0.894066	0.197284	-0.10853	0.390481	0.319445	-0.745841	-0.0418851	-0.607764	0.0820298	-0.219532	0.308178	-0.138175	-0.283705	-0.204867	-0.266533	0.144403
-4.95085	-1.28008	1.19061	-0.171931	-0.364124	-0.258461	0.020333	-0.297667	-0.754975	0.104719	0.525815	-0.215246	-0.131958	-0.329281	-0.152452	0.164423	-0.353628	-0.146965	0.28736	-0.308602	-0.787779	0.0308312	-0.294276	0.00408155	0.349451	-0.544714	-0.255911	0.0590279	-0.199348	-0.00767668	-0.08166	0.00798284	0.390724	-0.0602865	-0.893525	0.195318	-0.109943	0.391328	0.321907	-0.745306	-0.0422288	-0.608949	0.082754	-0.219014	0.309112	-0.135836	-0.284786	-0.206788	-0.268545	0.146037
-4.94986	-1.28053	1.19331	-0.171729	-0.363552	-0.257225	0.0205435	-0.301372	-0.754579	0.104276	0.524025	-0.216305	-0.133284	-0.329953	-0.150851	0.165161	-0.353625	-0.145589	0.286762	-0.309206	-0.7871	0.028363	-0.294724	0.0065698	0.348361	-0.544778	-0.255377	0.0582787	-0.199814	-0.00740217	-0.0801532	0.0146342	0.391925	-0.0590346	-0.892972	0.193369	-0.111362	0.39217	0.324349	-0.744755	-0.0425503	-0.610127	0.0834705	-0.218497	0.310054	-0.133507	-0.285855	-0.208704	-0.270545	0.147681
-4.94888	-1.28099	1.196	-0.171519	-0.362975	-0.255982	0.0207493	-0.305063	-0.754163	0.103825	0.522249	-0.217368	-0.134629	-0.330638	-0.149241	0.165882	-0.353644	-0.144209	0.286149	-0.309802	-0.786409	0.0259038	-0.295182	0.00904703	0.347274	-0.544835	-0.254834	0.0575197	-0.200263	-0.00713087	-0.0786545	0.0213075	0.393095	-0.0577675	-0.892408	0.191437	-0.112786	0.393009	0.326771	-0.744187	-0.0428498	-0.611297	0.0841793	-0.217981	0.311001	-0.131187	-0.286912	-0.210616	-0.272532	0.149333
-4.9479	-1.28144	1.19868	-0.171301	-0.362394	-0.254731	0.0209506	-0.30874	-0.753725	0.103365	0.520487	-0.218437	-0.135995	-0.331335	-0.147621	0.166587	-0.353686	-0.142824	0.285523	-0.31039	-0.785707	0.0234536	-0.295649	0.011513	0.346188	-0.544883	-0.254283	0.056751	-0.200695	-0.00686272	-0.0771642	0.0280026	0.394233	-0.0564855	-0.891833	0.189522	-0.114216	0.393843	0.329173	-0.743603	-0.0431272	-0.612458	0.0848802	-0.217466	0.311955	-0.128877	-0.287958	-0.212523	-0.274506	0.150993
-4.94692	-1.28189	1.20137	-0.171076	-0.361809	-0.253473	0.0211477	-0.312403	-0.753265	0.102897	0.518739	-0.21951	-0.137379	-0.332044	-0.145992	0.167275	-0.353751	-0.141434	0.284884	-0.310968	-0.784993	0.0210126	-0.296126	0.0139674	0.345105	-0.544924	-0.253723	0.0559724	-0.20111	-0.0065977	-0.0756823	0.0347193	0.39534	-0.0551885	-0.891247	0.187623	-0.115652	0.394673	0.331553	-0.743002	-0.0433825	-0.613611	0.0855732	-0.216953	0.312916	-0.126578	-0.288991	-0.214425	-0.276467	0.152662
-4.94593	-1.28234	1.20405	-0.170842	-0.36122	-0.252208	0.0213408	-0.316051	-0.752784	0.102422	0.517005	-0.220587	-0.138783	-0.332766	-0.144354	0.167945	-0.353839	-0.14004	0.284231	-0.311538	-0.784268	0.0185808	-0.296613	0.0164101	0.344025	-0.544957	-0.253154	0.055184	-0.201508	-0.00633577	-0.074209	0.0414571	0.396415	-0.0538768	-0.890651	0.185742	-0.117092	0.395498	0.333913	-0.742384	-0.0436158	-0.614756	0.0862582	-0.21644	0.313883	-0.124288	-0.290013	-0.216322	-0.278415	0.154338
-4.94495	-1.28279	1.20672	-0.170601	-0.360627	-0.250936	0.0215301	-0.319686	-0.752282	0.101938	0.515286	-0.221669	-0.140206	-0.3335	-0.142706	0.168598	-0.35395	-0.138641	0.283565	-0.312099	-0.783532	0.0161584	-0.297109	0.0188407	0.342947	-0.544982	-0.252577	0.0543857	-0.201888	-0.00607689	-0.0727444	0.0482159	0.397458	-0.0525504	-0.890043	0.183878	-0.118538	0.396319	0.336251	-0.74175	-0.043827	-0.615892	0.0869352	-0.215929	0.314856	-0.122009	-0.291023	-0.218213	-0.280349	0.156023
-4.94397	-1.28323	1.20939	-0.170352	-0.360032	-0.249657	0.0217159	-0.323305	-0.751758	0.101447	0.513582	-0.222756	-0.141647	-0.334247	-0.141051	0.169234	-0.354084	-0.137237	0.282885	-0.312652	-0.782785	0.0137455	-0.297614	0.021259	0.341872	-0.545	-0.25199	0.0535775	-0.202251	-0.00582102	-0.0712887	0.0549953	0.398469	-0.0512096	-0.889424	0.182032	-0.119989	0.397135	0.338569	-0.7411	-0.0440163	-0.617019	0.0876039	-0.215419	0.315836	-0.11974	-0.292021	-0.220099	-0.28227	0.157715
-4.94298	-1.28368	1.21206	-0.170094	-0.359432	-0.248371	0.0218984	-0.326909	-0.751212	0.100949	0.511892	-0.223846	-0.143107	-0.335006	-0.139386	0.169852	-0.35424	-0.135829	0.282193	-0.313195	-0.782026	0.0113423	-0.298129	0.0236648	0.3408	-0.54501	-0.251395	0.0527594	-0.202597	-0.00556813	-0.0698421	0.0617952	0.399447	-0.0498544	-0.888795	0.180203	-0.121446	0.397947	0.340865	-0.740433	-0.0441835	-0.618138	0.0882644	-0.21491	0.316822	-0.117483	-0.293006	-0.221979	-0.284178	0.159415
-4.942	-1.28412	1.21472	-0.169829	-0.35883	-0.247079	0.0220779	-0.330499	-0.750645	0.100443	0.510216	-0.22494	-0.144585	-0.335778	-0.137714	0.170452	-0.35442	-0.134416	0.281488	-0.31373	-0.781257	0.00894891	-0.298653	0.0260578	0.339731	-0.545012	-0.250791	0.0519313	-0.202924	-0.00531818	-0.0684046	0.0686151	0.400393	-0.048485	-0.888156	0.178391	-0.122907	0.398753	0.343139	-0.73975	-0.0443289	-0.619248	0.0889166	-0.214402	0.317815	-0.115236	-0.29398	-0.223854	-0.286072	0.161122
-4.94102	-1.28456	1.21738	-0.169557	-0.358225	-0.245781	0.0222546	-0.334072	-0.750056	0.0999298	0.508556	-0.226038	-0.146081	-0.336563	-0.136033	0.171034	-0.354622	-0.132999	0.28077	-0.314256	-0.780477	0.00656541	-0.299185	0.0284378	0.338666	-0.545007	-0.250178	0.0510932	-0.203235	-0.00507113	-0.0669764	0.0754549	0.401306	-0.0471015	-0.887506	0.176597	-0.124373	0.399555	0.345392	-0.739051	-0.0444522	-0.62035	0.0895604	-0.213895	0.318814	-0.113	-0.294942	-0.225722	-0.287951	0.162837
-4.94003	-1.28499	1.22003	-0.169276	-0.357617	-0.244477	0.0224288	-0.337631	-0.749445	0.0994096	0.50691	-0.227139	-0.147594	-0.33736	-0.134345	0.171598	-0.354847	-0.131578	0.28004	-0.314773	-0.779687	0.00419193	-0.299727	0.0308045	0.337605	-0.544994	-0.249555	0.0502451	-0.203527	-0.00482694	-0.0655576	0.0823141	0.402186	-0.0457041	-0.886846	0.174821	-0.125844	0.400352	0.347624	-0.738335	-0.0445537	-0.621442	0.0901957	-0.21339	0.319819	-0.110776	-0.295892	-0.227583	-0.289817	0.164558
-4.93905	-1.28543	1.22268	-0.168988	-0.357006	-0.243167	0.0226007	-0.341173	-0.748813	0.0988825	0.50528	-0.228244	-0.149126	-0.33817	-0.132648	0.172143	-0.355094	-0.130153	0.279298	-0.315281	-0.778886	0.00182861	-0.300277	0.0331577	0.336547	-0.544974	-0.248924	0.049387	-0.203802	-0.00458557	-0.0641484	0.0891926	0.403033	-0.0442929	-0.886176	0.173063	-0.12732	0.401144	0.349833	-0.737603	-0.0446334	-0.622525	0.0908225	-0.212885	0.320831	-0.108563	-0.296829	-0.229438	-0.291669	0.166286
-4.93807	-1.28586	1.22533	-0.168692	-0.356393	-0.241852	0.0227705	-0.344699	-0.748159	0.0983486	0.503664	-0.229352	-0.150674	-0.338993	-0.130945	0.17267	-0.355365	-0.128725	0.278543	-0.31578	-0.778074	-0.000524442	-0.300835	0.0354971	0.335494	-0.544947	-0.248284	0.0485189	-0.204059	-0.00434698	-0.0627488	0.09609	0.403846	-0.0428681	-0.885495	0.171323	-0.1288	0.40193	0.35202	-0.736855	-0.0446912	-0.623599	0.0914406	-0.212382	0.321849	-0.106362	-0.297755	-0.231286	-0.293507	0.168022
-4.93709	-1.2863	1.22797	-0.168388	-0.355777	-0.240531	0.0229386	-0.348209	-0.747483	0.0978081	0.502064	-0.230464	-0.15224	-0.339829	-0.129233	0.173178	-0.355658	-0.127292	0.277777	-0.316271	-0.777253	-0.00286709	-0.301402	0.0378225	0.334445	-0.544912	-0.247635	0.0476406	-0.204298	-0.00411113	-0.0613591	0.103006	0.404626	-0.0414298	-0.884805	0.169601	-0.130285	0.402711	0.354185	-0.736091	-0.0447273	-0.624663	0.0920501	-0.21188	0.322874	-0.104173	-0.298668	-0.233127	-0.295331	0.169763
-4.9361	-1.28673	1.23062	-0.168077	-0.355159	-0.239205	0.0231052	-0.351702	-0.746786	0.0972612	0.50048	-0.231578	-0.153822	-0.340677	-0.127515	0.173667	-0.355974	-0.125856	0.276998	-0.316752	-0.776421	-0.00519923	-0.301977	0.0401337	0.3334	-0.54487	-0.246976	0.0467523	-0.204519	-0.00387798	-0.0599794	0.109941	0.405371	-0.0399781	-0.884104	0.167897	-0.131775	0.403487	0.356328	-0.73531	-0.0447417	-0.625718	0.0926508	-0.211379	0.323904	-0.101996	-0.29957	-0.234961	-0.29714	0.171511
-4.93512	-1.28716	1.23325	-0.167757	-0.35454	-0.237873	0.0232705	-0.355179	-0.746067	0.0967079	0.49891	-0.232695	-0.155421	-0.341538	-0.12579	0.174137	-0.356313	-0.124416	0.276208	-0.317224	-0.77558	-0.00752073	-0.302561	0.0424303	0.33236	-0.544821	-0.246309	0.0458539	-0.204723	-0.00364748	-0.0586097	0.116893	0.406083	-0.0385133	-0.883394	0.166211	-0.133269	0.404257	0.358448	-0.734513	-0.0447345	-0.626764	0.0932427	-0.210879	0.324941	-0.0998309	-0.300459	-0.236788	-0.298934	0.173265
-4.93414	-1.28758	1.23589	-0.167431	-0.353918	-0.236537	0.0234349	-0.358639	-0.745327	0.0961485	0.497356	-0.233814	-0.157035	-0.342412	-0.124059	0.174589	-0.356675	-0.122972	0.275406	-0.317687	-0.774729	-0.00983149	-0.303152	0.0447123	0.331325	-0.544764	-0.245633	0.0449453	-0.204908	-0.00341961	-0.0572503	0.123863	0.406761	-0.0370354	-0.882675	0.164544	-0.134767	0.405022	0.360545	-0.733701	-0.0447057	-0.6278	0.0938257	-0.21038	0.325985	-0.0976784	-0.301336	-0.238606	-0.300714	0.175025
-4.93315	-1.28801	1.23852	-0.167096	-0.353295	-0.235196	0.0235984	-0.362081	-0.744564	0.0955832	0.495818	-0.234936	-0.158666	-0.343299	-0.12232	0.175021	-0.357059	-0.121526	0.274593	-0.318141	-0.773868	-0.0121314	-0.303751	0.0469793	0.330295	-0.544701	-0.244947	0.0440265	-0.205075	-0.0031943	-0.0559011	0.130851	0.407405	-0.0355447	-0.881946	0.162895	-0.136269	0.405781	0.36262	-0.732872	-0.0446554	-0.628826	0.0943998	-0.209882	0.327034	-0.0955385	-0.302201	-0.240417	-0.30248	0.176791
-4.93217	-1.28844	1.24115	-0.166754	-0.35267	-0.23385	0.0237615	-0.365507	-0.74378	0.095012	0.494296	-0.23606	-0.160313	-0.344199	-0.120576	0.175433	-0.357466	-0.120076	0.273768	-0.318585	-0.772997	-0.0144203	-0.304358	0.0492312	0.329271	-0.54463	-0.244253	0.0430976	-0.205224	-0.00297153	-0.0545625	0.137855	0.408014	-0.0340413	-0.881207	0.161265	-0.137776	0.406534	0.364672	-0.732027	-0.0445836	-0.629843	0.0949649	-0.209386	0.32809	-0.0934114	-0.303053	-0.24222	-0.30423	0.178562
-4.93119	-1.28886	1.24377	-0.166405	-0.352044	-0.2325	0.0239243	-0.368915	-0.742975	0.0944351	0.492789	-0.237187	-0.161975	-0.345112	-0.118825	0.175826	-0.357895	-0.118623	0.272933	-0.319021	-0.772117	-0.0166981	-0.304973	0.0514676	0.328252	-0.544553	-0.243549	0.0421585	-0.205355	-0.00275125	-0.0532344	0.144877	0.408589	-0.0325253	-0.880459	0.159653	-0.139287	0.407282	0.366701	-0.731167	-0.0444905	-0.63085	0.0955209	-0.20889	0.329152	-0.0912973	-0.303894	-0.244014	-0.305966	0.180339
-4.9302	-1.28928	1.2464	-0.166048	-0.351417	-0.231146	0.0240872	-0.372305	-0.742147	0.0938527	0.491298	-0.238315	-0.163652	-0.346038	-0.117069	0.176199	-0.358347	-0.117166	0.272086	-0.319447	-0.771228	-0.0189647	-0.305595	0.0536885	0.327238	-0.544468	-0.242836	0.0412092	-0.205468	-0.00253341	-0.051917	0.151915	0.409128	-0.0309969	-0.879702	0.15806	-0.140801	0.408023	0.368707	-0.73029	-0.044376	-0.631847	0.0960678	-0.208396	0.33022	-0.0891962	-0.304722	-0.2458	-0.307686	0.18212
-4.92922	-1.28971	1.24902	-0.165683	-0.350788	-0.229788	0.0242504	-0.375678	-0.741299	0.093265	0.489822	-0.239445	-0.165344	-0.346977	-0.115307	0.176552	-0.358821	-0.115707	0.271229	-0.319864	-0.77033	-0.0212199	-0.306224	0.0558934	0.326231	-0.544377	-0.242115	0.0402496	-0.205562	-0.00231798	-0.0506104	0.158969	0.409633	-0.0294563	-0.878936	0.156486	-0.14232	0.408759	0.37069	-0.729398	-0.0442403	-0.632833	0.0966056	-0.207903	0.331295	-0.0871084	-0.305539	-0.247577	-0.309392	0.183907
-4.92824	-1.29013	1.25164	-0.165311	-0.350159	-0.228426	0.0244141	-0.379032	-0.740428	0.0926721	0.488363	-0.240576	-0.167051	-0.347928	-0.11354	0.176886	-0.359318	-0.114246	0.270361	-0.320271	-0.769423	-0.0234638	-0.30686	0.0580824	0.325229	-0.544279	-0.241384	0.0392798	-0.205639	-0.00210491	-0.0493147	0.166039	0.410103	-0.0279037	-0.878161	0.154931	-0.143842	0.409488	0.372649	-0.72849	-0.0440836	-0.63381	0.0971342	-0.207411	0.332375	-0.0850341	-0.306343	-0.249345	-0.311082	0.185699
-4.92726	-1.29055	1.25425	-0.164932	-0.349529	-0.227061	0.0245787	-0.382368	-0.739536	0.0920742	0.48692	-0.241709	-0.168772	-0.348893	-0.111768	0.177199	-0.359837	-0.112781	0.269482	-0.32067	-0.768506	-0.0256961	-0.307504	0.060255	0.324234	-0.544174	-0.240644	0.0382998	-0.205697	-0.00189415	-0.0480301	0.173125	0.410538	-0.0263391	-0.877378	0.153395	-0.145368	0.410212	0.374585	-0.727567	-0.0439057	-0.634777	0.0976535	-0.20692	0.333461	-0.0829733	-0.307134	-0.251104	-0.312757	0.187495
-4.92627	-1.29096	1.25687	-0.164545	-0.348899	-0.225692	0.0247444	-0.385686	-0.738623	0.0914714	0.485493	-0.242844	-0.170507	-0.34987	-0.10999	0.177492	-0.360378	-0.111314	0.268594	-0.321058	-0.767581	-0.0279167	-0.308154	0.0624111	0.323245	-0.544062	-0.239895	0.0373095	-0.205736	-0.00168567	-0.0467567	0.180225	0.410937	-0.0247629	-0.876585	0.151879	-0.146898	0.410929	0.376498	-0.726628	-0.0437069	-0.635733	0.0981635	-0.20643	0.334554	-0.0809264	-0.307914	-0.252854	-0.314416	0.189296
-4.92529	-1.29138	1.25948	-0.16415	-0.348268	-0.22432	0.0249114	-0.388986	-0.737688	0.0908639	0.484082	-0.243979	-0.172256	-0.350861	-0.108208	0.177765	-0.360942	-0.109845	0.267695	-0.321437	-0.766648	-0.0301256	-0.308811	0.0645505	0.322262	-0.543944	-0.239136	0.0363089	-0.205758	-0.00147941	-0.0454945	0.187341	0.411301	-0.0231751	-0.875784	0.150381	-0.148431	0.411639	0.378386	-0.725673	-0.0434873	-0.636679	0.0986642	-0.205942	0.335652	-0.0788933	-0.308682	-0.254594	-0.31606	0.191101
-4.92431	-1.2918	1.26209	-0.163749	-0.347637	-0.222944	0.02508	-0.392266	-0.736732	0.0902519	0.482687	-0.245115	-0.174018	-0.351864	-0.106421	0.178017	-0.361527	-0.108373	0.266786	-0.321807	-0.765706	-0.0323226	-0.309475	0.0666729	0.321287	-0.54382	-0.238369	0.035298	-0.205761	-0.00127533	-0.0442437	0.194471	0.41163	-0.021576	-0.874974	0.148903	-0.149967	0.412344	0.380252	-0.724703	-0.0432469	-0.637614	0.0991554	-0.205454	0.336756	-0.0768744	-0.309437	-0.256324	-0.317689	0.19291
-4.92332	-1.29222	1.2647	-0.16334	-0.347006	-0.221566	0.0252506	-0.395528	-0.735754	0.0896355	0.481308	-0.246252	-0.175793	-0.352881	-0.104631	0.178249	-0.362135	-0.106899	0.265867	-0.322167	-0.764755	-0.0345076	-0.310145	0.0687782	0.320318	-0.543689	-0.237593	0.0342768	-0.205745	-0.00107339	-0.0430044	0.201615	0.411923	-0.0199657	-0.874156	0.147444	-0.151507	0.413041	0.382093	-0.723717	-0.0429858	-0.638539	0.0996373	-0.204968	0.337866	-0.0748697	-0.31018	-0.258044	-0.319301	0.194723
-4.92234	-1.29263	1.26731	-0.162923	-0.346375	-0.220186	0.0254233	-0.398771	-0.734755	0.0890149	0.479946	-0.247389	-0.177581	-0.35391	-0.102836	0.17846	-0.362765	-0.105423	0.264938	-0.322518	-0.763797	-0.0366806	-0.310822	0.0708662	0.319357	-0.543552	-0.236807	0.0332453	-0.205711	-0.000873545	-0.0417767	0.208774	0.412179	-0.0183444	-0.87333	0.146004	-0.15305	0.413732	0.38391	-0.722716	-0.0427042	-0.639454	0.10011	-0.204483	0.338982	-0.0728795	-0.310912	-0.259754	-0.320898	0.196539
-4.92136	-1.29305	1.26991	-0.162499	-0.345744	-0.218803	0.0255984	-0.401994	-0.733735	0.0883903	0.478599	-0.248526	-0.179382	-0.354952	-0.101037	0.17865	-0.363416	-0.103945	0.264	-0.322859	-0.76283	-0.0388414	-0.311505	0.0729366	0.318403	-0.543408	-0.236013	0.0322034	-0.205659	-0.000675743	-0.0405607	0.215946	0.4124	-0.0167122	-0.872496	0.144585	-0.154597	0.414417	0.385704	-0.7217	-0.0424021	-0.640358	0.100573	-0.203999	0.340104	-0.0709038	-0.311631	-0.261453	-0.322479	0.198359
-4.92037	-1.29346	1.27252	-0.162068	-0.345113	-0.217417	0.0257762	-0.405198	-0.732693	0.0877619	0.47727	-0.249664	-0.181195	-0.356007	-0.0992347	0.17882	-0.36409	-0.102466	0.263053	-0.32319	-0.761856	-0.0409899	-0.312193	0.0749892	0.317456	-0.543258	-0.235209	0.0311513	-0.205588	-0.000479941	-0.0393565	0.223131	0.412585	-0.0150694	-0.871654	0.143184	-0.156146	0.415094	0.387473	-0.720668	-0.0420797	-0.641251	0.101026	-0.203517	0.341231	-0.0689429	-0.312338	-0.263142	-0.324043	0.200182
-4.91939	-1.29387	1.27512	-0.16163	-0.344484	-0.21603	0.025957	-0.408383	-0.731631	0.0871297	0.475956	-0.250802	-0.183021	-0.357076	-0.0974291	0.178968	-0.364785	-0.100984	0.262096	-0.323511	-0.760873	-0.043126	-0.312888	0.0770239	0.316517	-0.543102	-0.234397	0.0300888	-0.205499	-0.000286092	-0.0381642	0.230329	0.412734	-0.0134161	-0.870804	0.141804	-0.157699	0.415765	0.389218	-0.719621	-0.0417371	-0.642133	0.10147	-0.203035	0.342364	-0.0669969	-0.313032	-0.26482	-0.325592	0.202008
-4.91841	-1.29429	1.27772	-0.161185	-0.343855	-0.21464	0.0261411	-0.411548	-0.730547	0.086494	0.474659	-0.251939	-0.184857	-0.358157	-0.0956203	0.179095	-0.365502	-0.0995014	0.261131	-0.323823	-0.759883	-0.0452497	-0.313588	0.0790404	0.315586	-0.54294	-0.233575	0.029016	-0.205391	-9.41505e-05	-0.036984	0.237539	0.412847	-0.0117526	-0.869946	0.140443	-0.159254	0.416429	0.390939	-0.71856	-0.0413745	-0.643004	0.101904	-0.202555	0.343502	-0.0650659	-0.313715	-0.266487	-0.327125	0.203837
-4.91742	-1.2947	1.28033	-0.160732	-0.343226	-0.213249	0.0263287	-0.414693	-0.729442	0.085855	0.473379	-0.253076	-0.186705	-0.359251	-0.0938087	0.179202	-0.36624	-0.098017	0.260156	-0.324125	-0.758885	-0.0473608	-0.314294	0.0810386	0.314663	-0.542772	-0.232745	0.0279328	-0.205265	9.59308e-05	-0.0358158	0.244762	0.412923	-0.0100789	-0.86908	0.139103	-0.160812	0.417085	0.392635	-0.717483	-0.0409918	-0.643865	0.102328	-0.202076	0.344646	-0.0631501	-0.314386	-0.268143	-0.328641	0.205669
-4.91644	-1.29511	1.28293	-0.160272	-0.342599	-0.211856	0.02652	-0.417819	-0.728317	0.0852127	0.472115	-0.254212	-0.188565	-0.360358	-0.0919944	0.179287	-0.367	-0.0965313	0.259173	-0.324416	-0.75788	-0.0494592	-0.315006	0.0830182	0.313749	-0.542598	-0.231905	0.0268393	-0.205121	0.000284199	-0.0346598	0.251996	0.412963	-0.00839538	-0.868207	0.137782	-0.162373	0.417735	0.394307	-0.716391	-0.0405893	-0.644714	0.102743	-0.201599	0.345796	-0.0612496	-0.315044	-0.269787	-0.330141	0.207503
-4.91546	-1.29552	1.28553	-0.159805	-0.341973	-0.210462	0.0267155	-0.420924	-0.72717	0.0845675	0.470867	-0.255348	-0.190434	-0.361477	-0.0901777	0.17935	-0.367781	-0.0950443	0.258181	-0.324698	-0.756868	-0.0515448	-0.315722	0.0849791	0.312842	-0.542419	-0.231057	0.0257354	-0.204958	0.000470701	-0.0335162	0.259243	0.412966	-0.00670211	-0.867327	0.136482	-0.163937	0.418377	0.395955	-0.715284	-0.0401671	-0.645553	0.103148	-0.201122	0.346951	-0.0593647	-0.315691	-0.27142	-0.331624	0.209339
-4.91448	-1.29593	1.28812	-0.159331	-0.341349	-0.209067	0.0269153	-0.424009	-0.726003	0.0839193	0.469637	-0.256483	-0.192315	-0.36261	-0.0883589	0.179392	-0.368584	-0.0935564	0.257181	-0.32497	-0.755848	-0.0536176	-0.316444	0.0869211	0.311944	-0.542233	-0.230199	0.0246212	-0.204777	0.000655484	-0.0323849	0.2665	0.412933	-0.00499932	-0.866439	0.135201	-0.165503	0.419013	0.397578	-0.714163	-0.0397254	-0.64638	0.103544	-0.200647	0.348111	-0.0574953	-0.316326	-0.273041	-0.333091	0.211177
-4.91349	-1.29635	1.29072	-0.15885	-0.340725	-0.207671	0.0271197	-0.427074	-0.724814	0.0832686	0.468422	-0.257616	-0.194205	-0.363755	-0.0865381	0.179413	-0.369407	-0.0920675	0.256172	-0.325232	-0.754821	-0.0556775	-0.317171	0.0888439	0.311055	-0.542042	-0.229333	0.0234966	-0.204577	0.000838596	-0.0312661	0.273768	0.412863	-0.0032872	-0.865545	0.133941	-0.167071	0.41964	0.399177	-0.713027	-0.0392642	-0.647196	0.10393	-0.200173	0.349276	-0.0556418	-0.316949	-0.274649	-0.334541	0.213017
-4.91251	-1.29676	1.29332	-0.158362	-0.340104	-0.206274	0.0273289	-0.430118	-0.723606	0.0826153	0.467224	-0.258748	-0.196105	-0.364913	-0.0847156	0.179412	-0.370252	-0.0905778	0.255155	-0.325484	-0.753788	-0.0577243	-0.317903	0.0907475	0.310175	-0.541846	-0.228458	0.0223617	-0.204359	0.00102009	-0.0301599	0.281047	0.412756	-0.00156594	-0.864643	0.132701	-0.168642	0.420261	0.40075	-0.711876	-0.0387837	-0.648001	0.104306	-0.199701	0.350447	-0.0538042	-0.317559	-0.276245	-0.335975	0.214859
-4.91153	-1.29717	1.29592	-0.157867	-0.339484	-0.204876	0.0275434	-0.433142	-0.722376	0.0819596	0.466043	-0.259879	-0.198015	-0.366084	-0.0828917	0.17939	-0.371117	-0.0890874	0.25413	-0.325726	-0.752748	-0.0597579	-0.318639	0.0926316	0.309304	-0.541644	-0.227574	0.0212165	-0.204122	0.0012	-0.0290664	0.288335	0.412612	0.00016426	-0.863734	0.131482	-0.170215	0.420874	0.402299	-0.710711	-0.0382841	-0.648795	0.104672	-0.199229	0.351622	-0.0519826	-0.318158	-0.277829	-0.337392	0.216702
-4.91054	-1.29758	1.29852	-0.157364	-0.338867	-0.203478	0.0277633	-0.436145	-0.721126	0.0813018	0.464878	-0.261007	-0.199934	-0.367268	-0.0810665	0.179345	-0.372004	-0.0875964	0.253098	-0.325957	-0.751701	-0.0617784	-0.31938	0.0944961	0.308442	-0.541436	-0.226681	0.0200609	-0.203867	0.00137839	-0.0279856	0.295634	0.412432	0.00190321	-0.862819	0.130283	-0.171791	0.421479	0.403824	-0.709532	-0.0377655	-0.649577	0.105028	-0.198759	0.352803	-0.0501773	-0.318745	-0.2794	-0.338792	0.218546
-4.90956	-1.29799	1.30112	-0.156855	-0.338251	-0.20208	0.0279889	-0.439127	-0.719856	0.080642	0.46373	-0.262134	-0.201861	-0.368464	-0.0792404	0.179279	-0.37291	-0.0861051	0.252058	-0.326179	-0.750648	-0.0637855	-0.320125	0.0963408	0.30759	-0.541223	-0.22578	0.0188949	-0.203593	0.0015553	-0.0269177	0.302942	0.412215	0.0036507	-0.861897	0.129105	-0.173368	0.422077	0.405323	-0.708337	-0.0372281	-0.650348	0.105375	-0.198291	0.353988	-0.0483882	-0.31932	-0.280958	-0.340175	0.220391
-4.90858	-1.2984	1.30371	-0.156339	-0.337638	-0.200681	0.0282205	-0.442089	-0.718566	0.0799803	0.462599	-0.263259	-0.203798	-0.369673	-0.0774135	0.179191	-0.373838	-0.0846134	0.25101	-0.32639	-0.749588	-0.0657793	-0.320874	0.0981655	0.306747	-0.541005	-0.22487	0.0177187	-0.203302	0.00173078	-0.0258626	0.310259	0.41196	0.00540655	-0.860968	0.127947	-0.174948	0.422667	0.406797	-0.707129	-0.0366719	-0.651107	0.105712	-0.197823	0.355179	-0.0466157	-0.319884	-0.282503	-0.341541	0.222237
-4.90759	-1.29881	1.30631	-0.155816	-0.337027	-0.199283	0.0284584	-0.445029	-0.717255	0.079317	0.461484	-0.264381	-0.205742	-0.370895	-0.0755862	0.179081	-0.374786	-0.0831216	0.249955	-0.32659	-0.748522	-0.0677596	-0.321628	0.0999701	0.305914	-0.540782	-0.223951	0.0165321	-0.202992	0.00190488	-0.0248206	0.317585	0.411669	0.00717054	-0.860034	0.12681	-0.176529	0.423249	0.408247	-0.705907	-0.0360973	-0.651855	0.106039	-0.197358	0.356374	-0.0448598	-0.320435	-0.284035	-0.34289	0.224083
-4.90661	-1.29922	1.30891	-0.155286	-0.336418	-0.197886	0.0287028	-0.447948	-0.715924	0.0786522	0.460385	-0.265501	-0.207694	-0.372129	-0.0737586	0.178949	-0.375754	-0.0816297	0.248893	-0.32678	-0.74745	-0.0697263	-0.322385	0.101754	0.305091	-0.540554	-0.223023	0.0153352	-0.202663	0.00207764	-0.0237916	0.324919	0.41134	0.00894248	-0.859093	0.125694	-0.178112	0.423823	0.409671	-0.70467	-0.0355042	-0.652592	0.106356	-0.196893	0.357574	-0.0431206	-0.320975	-0.285553	-0.344221	0.22593
-4.90563	-1.29963	1.31151	-0.154749	-0.335813	-0.196488	0.028954	-0.450846	-0.714574	0.0779861	0.459304	-0.266619	-0.209654	-0.373376	-0.071931	0.178796	-0.376742	-0.080138	0.247824	-0.32696	-0.746372	-0.0716795	-0.323147	0.103518	0.304277	-0.540321	-0.222087	0.014128	-0.202317	0.00224913	-0.0227758	0.332261	0.410975	0.0107222	-0.858145	0.124599	-0.179697	0.424389	0.411071	-0.70342	-0.034893	-0.653316	0.106664	-0.19643	0.358778	-0.0413983	-0.321504	-0.287057	-0.345536	0.227777
-4.90465	-1.30004	1.31411	-0.154206	-0.33521	-0.195092	0.0292124	-0.453723	-0.713203	0.0773189	0.458238	-0.267733	-0.21162	-0.374635	-0.0701036	0.17862	-0.37775	-0.0786465	0.246748	-0.32713	-0.745288	-0.0736189	-0.323911	0.105261	0.303474	-0.540083	-0.221142	0.0129105	-0.201952	0.00241938	-0.0217732	0.339611	0.410572	0.0125094	-0.857192	0.123524	-0.181284	0.424947	0.412445	-0.702155	-0.0342638	-0.654029	0.106961	-0.195968	0.359987	-0.0396929	-0.32202	-0.288548	-0.346833	0.229623
-4.90366	-1.30045	1.31671	-0.153656	-0.33461	-0.193696	0.0294781	-0.456578	-0.711813	0.0766506	0.45719	-0.268844	-0.213594	-0.375907	-0.0682768	0.178422	-0.378778	-0.0771554	0.245666	-0.327289	-0.744198	-0.0755445	-0.32468	0.106984	0.302681	-0.53984	-0.220189	0.0116827	-0.201569	0.00258845	-0.0207839	0.346968	0.410132	0.0143039	-0.856233	0.122471	-0.182872	0.425497	0.413795	-0.700877	-0.0336166	-0.654731	0.107249	-0.195508	0.361201	-0.0380047	-0.322525	-0.290024	-0.348113	0.23147
-4.90268	-1.30086	1.31931	-0.153099	-0.334014	-0.192302	0.0297515	-0.459412	-0.710403	0.0759816	0.456158	-0.269952	-0.215574	-0.377191	-0.0664507	0.178202	-0.379825	-0.0756647	0.244576	-0.327437	-0.743103	-0.0774562	-0.325451	0.108685	0.301899	-0.539593	-0.219227	0.0104447	-0.201168	0.00275638	-0.0198079	0.354332	0.409655	0.0161056	-0.855269	0.121439	-0.184462	0.426039	0.415119	-0.699585	-0.0329518	-0.65542	0.107527	-0.195049	0.362419	-0.0363338	-0.323018	-0.291486	-0.349376	0.233315
-4.9017	-1.30127	1.32192	-0.152535	-0.33342	-0.190908	0.0300328	-0.462224	-0.708974	0.0753119	0.455142	-0.271057	-0.21756	-0.378487	-0.0646255	0.177959	-0.380892	-0.0741747	0.243481	-0.327574	-0.742003	-0.079354	-0.326226	0.110365	0.301127	-0.539341	-0.218257	0.0091964	-0.200749	0.00292323	-0.0188455	0.361703	0.40914	0.0179142	-0.854298	0.120428	-0.186053	0.426573	0.416418	-0.698279	-0.0322695	-0.656098	0.107795	-0.194592	0.36364	-0.0346802	-0.3235	-0.292933	-0.350621	0.23516
-4.90071	-1.30169	1.32452	-0.151965	-0.33283	-0.189516	0.0303223	-0.465014	-0.707525	0.0746418	0.454143	-0.272158	-0.219552	-0.379795	-0.0628016	0.177695	-0.381979	-0.0726855	0.242379	-0.327701	-0.740897	-0.0812378	-0.327004	0.112024	0.300366	-0.539084	-0.217278	0.00793787	-0.200311	0.00308905	-0.0178965	0.36908	0.408589	0.0197294	-0.853323	0.119438	-0.187645	0.427099	0.417691	-0.69696	-0.0315699	-0.656764	0.108053	-0.194136	0.364867	-0.0330441	-0.323971	-0.294365	-0.351848	0.237005
-4.89973	-1.3021	1.32713	-0.151388	-0.332244	-0.188126	0.0306204	-0.467783	-0.706057	0.0739714	0.45316	-0.273255	-0.221549	-0.381116	-0.0609792	0.177408	-0.383084	-0.0711971	0.241271	-0.327817	-0.739786	-0.0831075	-0.327784	0.113662	0.299616	-0.538823	-0.216292	0.00666913	-0.199856	0.00325387	-0.0169611	0.376462	0.408	0.0215512	-0.852341	0.118469	-0.189239	0.427616	0.41894	-0.695627	-0.0308531	-0.657418	0.108302	-0.193682	0.366097	-0.0314256	-0.32443	-0.295783	-0.353058	0.238847
-4.89875	-1.30251	1.32973	-0.150804	-0.331661	-0.186738	0.0309271	-0.47053	-0.70457	0.0733008	0.452194	-0.274348	-0.223552	-0.382449	-0.0591585	0.177099	-0.384209	-0.0697098	0.240158	-0.327923	-0.73867	-0.0849631	-0.328567	0.115278	0.298877	-0.538558	-0.215296	0.00539019	-0.199383	0.00341777	-0.0160393	0.38385	0.407373	0.0233793	-0.851355	0.117522	-0.190833	0.428124	0.420163	-0.694282	-0.0301193	-0.65806	0.10854	-0.193229	0.367331	-0.0298248	-0.324877	-0.297185	-0.35425	0.240689
-4.89776	-1.30292	1.33234	-0.150214	-0.331083	-0.185351	0.031243	-0.473255	-0.703063	0.0726303	0.451244	-0.275437	-0.225559	-0.383794	-0.0573398	0.176767	-0.385352	-0.0682237	0.239038	-0.328017	-0.737549	-0.0868044	-0.329353	0.116873	0.298149	-0.538289	-0.214293	0.00410107	-0.198892	0.00358078	-0.0151313	0.391244	0.40671	0.0252134	-0.850364	0.116597	-0.192429	0.428624	0.421361	-0.692922	-0.0293688	-0.65869	0.108769	-0.192778	0.368569	-0.0282418	-0.325314	-0.298573	-0.355424	0.242529
-4.89678	-1.30334	1.33495	-0.149617	-0.330508	-0.183967	0.0315681	-0.475958	-0.701538	0.07196	0.450311	-0.276521	-0.227571	-0.385151	-0.0555233	0.176414	-0.386514	-0.0667389	0.237913	-0.328101	-0.736423	-0.0886315	-0.330141	0.118445	0.297433	-0.538015	-0.213282	0.00280179	-0.198383	0.00374295	-0.014237	0.398642	0.406009	0.0270534	-0.849367	0.115692	-0.194025	0.429116	0.422534	-0.69155	-0.0286017	-0.659309	0.108988	-0.192328	0.36981	-0.0266768	-0.325739	-0.299944	-0.356581	0.244367
-4.8958	-1.30375	1.33757	-0.149014	-0.329937	-0.182585	0.0319028	-0.478639	-0.699995	0.0712901	0.449394	-0.277601	-0.229586	-0.38652	-0.0537093	0.176038	-0.387695	-0.0652555	0.236783	-0.328174	-0.735292	-0.0904442	-0.330932	0.119996	0.296728	-0.537738	-0.212262	0.00149238	-0.197856	0.00390434	-0.0133565	0.406044	0.405271	0.0288991	-0.848366	0.11481	-0.195623	0.429599	0.423681	-0.690165	-0.0278182	-0.659915	0.109197	-0.19188	0.371055	-0.0251298	-0.326152	-0.3013	-0.35772	0.246203
-4.89481	-1.30416	1.34018	-0.148404	-0.329371	-0.181206	0.0322474	-0.481297	-0.698432	0.0706208	0.448493	-0.278675	-0.231606	-0.387901	-0.051898	0.175639	-0.388894	-0.0637736	0.235647	-0.328235	-0.734157	-0.0922425	-0.331724	0.121525	0.296034	-0.537456	-0.211234	0.000172862	-0.197312	0.00406499	-0.0124899	0.413451	0.404495	0.0307501	-0.847361	0.113949	-0.197221	0.430073	0.424803	-0.688767	-0.0270186	-0.660509	0.109397	-0.191434	0.372304	-0.023601	-0.326555	-0.30264	-0.35884	0.248037
-4.89383	-1.30458	1.3428	-0.147788	-0.328809	-0.179829	0.0326021	-0.483934	-0.696851	0.0699521	0.447609	-0.279745	-0.233628	-0.389294	-0.0500897	0.175219	-0.390111	-0.0622935	0.234506	-0.328286	-0.733018	-0.0940263	-0.332518	0.123032	0.295353	-0.537171	-0.210199	-0.00115674	-0.19675	0.00422496	-0.0116372	0.420861	0.403683	0.0326064	-0.84635	0.11311	-0.19882	0.430538	0.4259	-0.687356	-0.0262029	-0.661091	0.109587	-0.190989	0.373556	-0.0220905	-0.326947	-0.303963	-0.359943	0.249868
-4.89285	-1.30499	1.34542	-0.147166	-0.328251	-0.178456	0.0329673	-0.486548	-0.695252	0.0692844	0.446741	-0.28081	-0.235654	-0.390699	-0.0482846	0.174776	-0.391346	-0.0608152	0.233361	-0.328326	-0.731874	-0.0957955	-0.333314	0.124516	0.294683	-0.536882	-0.209155	-0.00249639	-0.19617	0.0043843	-0.0107985	0.428274	0.402833	0.0344677	-0.845336	0.112293	-0.200419	0.430995	0.426972	-0.685932	-0.0253715	-0.661661	0.109767	-0.190546	0.374811	-0.0205983	-0.327327	-0.305271	-0.361028	0.251696
-4.89187	-1.30541	1.34804	-0.146537	-0.327699	-0.177085	0.0333432	-0.489141	-0.693635	0.0686176	0.445888	-0.281869	-0.237682	-0.392115	-0.046483	0.17431	-0.392599	-0.0593389	0.23221	-0.328354	-0.730726	-0.0975502	-0.334112	0.125978	0.294025	-0.53659	-0.208104	-0.00384607	-0.195573	0.00454305	-0.00997388	0.43569	0.401946	0.0363337	-0.844317	0.111497	-0.202019	0.431442	0.428018	-0.684496	-0.0245245	-0.662219	0.109937	-0.190105	0.37607	-0.0191246	-0.327697	-0.306562	-0.362095	0.253522
-4.89088	-1.30583	1.35066	-0.145902	-0.327151	-0.175717	0.03373	-0.49171	-0.692	0.0679522	0.445052	-0.282922	-0.239713	-0.393543	-0.0446851	0.173822	-0.393869	-0.0578647	0.231055	-0.328371	-0.729574	-0.0992903	-0.334911	0.127417	0.293379	-0.536293	-0.207045	-0.00520575	-0.194958	0.00470127	-0.0091633	0.443109	0.401022	0.0382043	-0.843293	0.110723	-0.203619	0.431881	0.429039	-0.683047	-0.0236622	-0.662765	0.110098	-0.189665	0.377331	-0.0176695	-0.328055	-0.307836	-0.363143	0.255344
-4.8899	-1.30624	1.35328	-0.14526	-0.326608	-0.174353	0.034128	-0.494258	-0.690347	0.0672881	0.444233	-0.28397	-0.241746	-0.394982	-0.0428911	0.173312	-0.395157	-0.0563928	0.229895	-0.328377	-0.728419	-0.101016	-0.335711	0.128834	0.292745	-0.535994	-0.205978	-0.00657539	-0.194327	0.00485901	-0.00836686	0.45053	0.400061	0.0400792	-0.842266	0.109972	-0.20522	0.432311	0.430035	-0.681586	-0.0227847	-0.663298	0.110249	-0.189227	0.378596	-0.016233	-0.328403	-0.309093	-0.364174	0.257163
-4.88892	-1.30666	1.35591	-0.144613	-0.32607	-0.172993	0.0345376	-0.496783	-0.688676	0.0666255	0.443429	-0.285012	-0.24378	-0.396433	-0.0411014	0.17278	-0.396462	-0.0549232	0.228731	-0.328372	-0.727259	-0.102726	-0.336513	0.130228	0.292124	-0.535691	-0.204904	-0.00795496	-0.193677	0.00501631	-0.00758459	0.457953	0.399062	0.0419583	-0.841235	0.109242	-0.20682	0.432731	0.431005	-0.680113	-0.0218922	-0.66382	0.11039	-0.188791	0.379863	-0.0148153	-0.32874	-0.310333	-0.365186	0.258979
-4.88793	-1.30708	1.35854	-0.143959	-0.325537	-0.171636	0.034959	-0.499286	-0.686987	0.0659647	0.442641	-0.286047	-0.245815	-0.397895	-0.0393162	0.172225	-0.397784	-0.0534561	0.227563	-0.328355	-0.726096	-0.104422	-0.337315	0.131599	0.291515	-0.535385	-0.203822	-0.00934443	-0.193011	0.00517324	-0.00681653	0.465377	0.398027	0.0438412	-0.8402	0.108535	-0.208421	0.433142	0.43195	-0.678628	-0.020985	-0.664329	0.110522	-0.188357	0.381133	-0.0134164	-0.329067	-0.311556	-0.366179	0.26079
-4.88695	-1.3075	1.36118	-0.143299	-0.32501	-0.170284	0.0353924	-0.501766	-0.685282	0.0653057	0.441868	-0.287077	-0.247851	-0.399368	-0.0375357	0.171648	-0.399123	-0.0519917	0.226391	-0.328327	-0.724929	-0.106103	-0.338118	0.132947	0.290918	-0.535076	-0.202733	-0.0107438	-0.192328	0.00532983	-0.00606274	0.472802	0.396954	0.0457278	-0.839162	0.10785	-0.210022	0.433545	0.43287	-0.67713	-0.0200634	-0.664826	0.110644	-0.187924	0.382405	-0.0120365	-0.329382	-0.312761	-0.367155	0.262598
-4.88597	-1.30792	1.36382	-0.142633	-0.324488	-0.168935	0.0358382	-0.504223	-0.683559	0.0646488	0.441112	-0.288099	-0.249888	-0.400853	-0.0357601	0.171049	-0.400478	-0.0505301	0.225215	-0.328287	-0.723759	-0.107769	-0.338922	0.134273	0.290335	-0.534764	-0.201636	-0.0121529	-0.191627	0.00548614	-0.00532324	0.480228	0.395845	0.0476179	-0.83812	0.107187	-0.211623	0.433938	0.433764	-0.675621	-0.0191274	-0.665311	0.110757	-0.187494	0.38368	-0.0106755	-0.329687	-0.313949	-0.368112	0.264401
-4.88498	-1.30834	1.36646	-0.141961	-0.323971	-0.167591	0.0362965	-0.506659	-0.681819	0.063994	0.440372	-0.289115	-0.251925	-0.402349	-0.0339898	0.170427	-0.40185	-0.0490714	0.224035	-0.328236	-0.722586	-0.10942	-0.339726	0.135575	0.289764	-0.534448	-0.200532	-0.0135718	-0.19091	0.00564221	-0.00459808	0.487655	0.394699	0.0495111	-0.837075	0.106546	-0.213224	0.434321	0.434634	-0.6741	-0.0181774	-0.665783	0.11086	-0.187065	0.384957	-0.00933371	-0.329982	-0.315119	-0.369051	0.2662
-4.884	-1.30876	1.3691	-0.141283	-0.32346	-0.166251	0.0367678	-0.509071	-0.680062	0.0633417	0.439647	-0.290124	-0.253961	-0.403855	-0.0322249	0.169783	-0.403238	-0.0476158	0.222852	-0.328173	-0.721409	-0.111056	-0.340531	0.136853	0.289205	-0.534131	-0.199421	-0.0150005	-0.190176	0.00579811	-0.00388728	0.495081	0.393516	0.0514074	-0.836026	0.105928	-0.214824	0.434696	0.435478	-0.672567	-0.0172135	-0.666243	0.110954	-0.186639	0.386237	-0.00801108	-0.330266	-0.316271	-0.369971	0.267994
-4.88302	-1.30919	1.37175	-0.140599	-0.322955	-0.164916	0.0372521	-0.511461	-0.678288	0.0626918	0.438937	-0.291125	-0.255997	-0.405373	-0.0304658	0.169117	-0.404642	-0.0461634	0.221665	-0.328099	-0.72023	-0.112677	-0.341336	0.138109	0.28866	-0.53381	-0.198303	-0.0164389	-0.189425	0.00595388	-0.00319089	0.502507	0.392296	0.0533064	-0.834975	0.105332	-0.216425	0.43506	0.436297	-0.671023	-0.0162361	-0.666691	0.111038	-0.186214	0.387518	-0.00670772	-0.33054	-0.317405	-0.370873	0.269783
-4.88204	-1.30961	1.3744	-0.139909	-0.322456	-0.163586	0.0377499	-0.513829	-0.676498	0.0620447	0.438244	-0.29212	-0.258032	-0.406901	-0.0287126	0.168429	-0.406061	-0.0447143	0.220475	-0.328013	-0.719048	-0.114283	-0.34214	0.139341	0.288128	-0.533487	-0.197177	-0.0178869	-0.188658	0.00610956	-0.00250894	0.509932	0.39104	0.055208	-0.83392	0.104758	-0.218024	0.435416	0.437091	-0.669467	-0.0152452	-0.667127	0.111113	-0.185791	0.388802	-0.0054237	-0.330804	-0.31852	-0.371756	0.271567
-4.88105	-1.31003	1.37705	-0.139213	-0.321963	-0.16226	0.0382614	-0.516173	-0.674692	0.0614004	0.437565	-0.293106	-0.260065	-0.40844	-0.0269656	0.167719	-0.407496	-0.0432686	0.219282	-0.327915	-0.717863	-0.115874	-0.342945	0.14055	0.287609	-0.533161	-0.196045	-0.0193446	-0.187874	0.00626522	-0.00184145	0.517355	0.389747	0.057112	-0.832863	0.104208	-0.219624	0.435762	0.437859	-0.6679	-0.0142412	-0.66755	0.111178	-0.18537	0.390087	-0.00415911	-0.331057	-0.319617	-0.372621	0.273346
-4.88007	-1.31046	1.37971	-0.138511	-0.321477	-0.16094	0.0387868	-0.518496	-0.67287	0.0607591	0.436902	-0.294085	-0.262097	-0.40999	-0.0252251	0.166987	-0.408946	-0.0418266	0.218086	-0.327806	-0.716675	-0.117449	-0.34375	0.141735	0.287104	-0.532833	-0.194905	-0.0208118	-0.187074	0.00642089	-0.00118846	0.524778	0.388417	0.059018	-0.831803	0.103679	-0.221222	0.436098	0.438603	-0.666322	-0.0132243	-0.667961	0.111234	-0.184952	0.391373	-0.002914	-0.3313	-0.320695	-0.373467	0.275119
-4.87909	-1.31089	1.38237	-0.137803	-0.320996	-0.159625	0.0393264	-0.520795	-0.671031	0.0601209	0.436254	-0.295056	-0.264127	-0.41155	-0.0234913	0.166232	-0.410412	-0.0403882	0.216887	-0.327684	-0.715485	-0.11901	-0.344554	0.142896	0.286611	-0.532502	-0.193759	-0.0222885	-0.186258	0.00657664	-0.000549979	0.532198	0.387051	0.0609258	-0.83074	0.103174	-0.22282	0.436425	0.439322	-0.664733	-0.0121948	-0.66836	0.111281	-0.184535	0.392661	-0.00168847	-0.331533	-0.321754	-0.374294	0.276886
-4.8781	-1.31131	1.38503	-0.13709	-0.320522	-0.158315	0.0398805	-0.523072	-0.669177	0.0594861	0.435622	-0.296019	-0.266154	-0.413121	-0.0217645	0.165456	-0.411892	-0.0389538	0.215686	-0.327551	-0.714292	-0.120555	-0.345357	0.144034	0.286132	-0.532169	-0.192607	-0.0237747	-0.185425	0.0067325	7.39555e-05	0.539616	0.385649	0.0628354	-0.829675	0.102691	-0.224418	0.436741	0.440015	-0.663133	-0.0111528	-0.668747	0.111319	-0.184121	0.393951	-0.000482562	-0.331756	-0.322794	-0.375103	0.278648
-4.87712	-1.31174	1.3877	-0.13637	-0.320054	-0.157012	0.0404493	-0.525327	-0.667307	0.0588547	0.435004	-0.296973	-0.268179	-0.414702	-0.0200448	0.164658	-0.413386	-0.0375233	0.214482	-0.327406	-0.713097	-0.122085	-0.34616	0.145148	0.285667	-0.531834	-0.191447	-0.0252703	-0.184576	0.00688853	0.000683325	0.547031	0.38421	0.0647463	-0.828608	0.102231	-0.226014	0.437049	0.440684	-0.661522	-0.0100986	-0.669121	0.111347	-0.183708	0.395242	0.000703643	-0.33197	-0.323815	-0.375893	0.280403
-4.87614	-1.31217	1.39037	-0.135646	-0.319593	-0.155713	0.0410331	-0.527558	-0.665421	0.058227	0.434402	-0.297919	-0.2702	-0.416293	-0.0183326	0.163837	-0.414895	-0.036097	0.213276	-0.327249	-0.7119	-0.1236	-0.346961	0.146238	0.285215	-0.531498	-0.190281	-0.0267753	-0.183712	0.00704478	0.00127811	0.554444	0.382736	0.0666584	-0.827538	0.101793	-0.22761	0.437346	0.441328	-0.6599	-0.00903241	-0.669483	0.111366	-0.183298	0.396533	0.00187009	-0.332173	-0.324816	-0.376665	0.282151
-4.87515	-1.3126	1.39305	-0.134915	-0.319139	-0.154421	0.0416322	-0.529768	-0.663521	0.057603	0.433814	-0.298857	-0.272218	-0.417894	-0.0166281	0.162995	-0.416418	-0.0346749	0.212068	-0.32708	-0.710701	-0.125099	-0.347762	0.147304	0.284777	-0.531159	-0.189109	-0.0282896	-0.182832	0.0072013	0.00185829	0.561853	0.381225	0.0685715	-0.826467	0.101379	-0.229204	0.437634	0.441947	-0.658268	-0.00795454	-0.669832	0.111376	-0.18289	0.397826	0.0030167	-0.332367	-0.325798	-0.377417	0.283893
-4.87417	-1.31303	1.39573	-0.134179	-0.318691	-0.153135	0.0422468	-0.531954	-0.661605	0.0569829	0.433242	-0.299785	-0.274232	-0.419505	-0.0149315	0.162132	-0.417955	-0.0332572	0.210857	-0.326899	-0.7095	-0.126583	-0.348562	0.148347	0.284353	-0.530818	-0.18793	-0.0298131	-0.181936	0.00735813	0.00242385	0.569258	0.379679	0.0704853	-0.825394	0.100988	-0.230798	0.437911	0.442541	-0.656626	-0.00686522	-0.67017	0.111377	-0.182485	0.399119	0.00414344	-0.332551	-0.32676	-0.378151	0.285628
-4.87319	-1.31346	1.39842	-0.133438	-0.318251	-0.151855	0.0428772	-0.534118	-0.659675	0.056367	0.432684	-0.300704	-0.276241	-0.421126	-0.013243	0.161246	-0.419506	-0.0318441	0.209645	-0.326706	-0.708297	-0.128051	-0.34936	0.149365	0.283942	-0.530476	-0.186745	-0.0313459	-0.181024	0.00751533	0.00297478	0.576659	0.378097	0.0723996	-0.824318	0.100619	-0.23239	0.438179	0.443111	-0.654973	-0.00576467	-0.670495	0.111369	-0.182081	0.400413	0.00525024	-0.332726	-0.327702	-0.378866	0.287356
-4.8722	-1.31389	1.40111	-0.13269	-0.317817	-0.150582	0.0435236	-0.53626	-0.65773	0.0557552	0.43214	-0.301614	-0.278246	-0.422756	-0.011563	0.16034	-0.42107	-0.0304356	0.208431	-0.326501	-0.707092	-0.129505	-0.350156	0.150359	0.283546	-0.530132	-0.185554	-0.0328877	-0.180097	0.00767295	0.00351106	0.584055	0.376479	0.0743141	-0.823242	0.100274	-0.233981	0.438437	0.443656	-0.65331	-0.00465316	-0.670807	0.111353	-0.181681	0.401708	0.00633705	-0.332891	-0.328624	-0.379562	0.289077
-4.87122	-1.31433	1.4038	-0.131938	-0.317391	-0.149315	0.0441863	-0.538378	-0.65577	0.0551479	0.431611	-0.302515	-0.280246	-0.424397	-0.00989168	0.159411	-0.422647	-0.0290319	0.207215	-0.326283	-0.705886	-0.130943	-0.350951	0.15133	0.283163	-0.529787	-0.184357	-0.0344387	-0.179155	0.00783102	0.00403269	0.591447	0.374825	0.0762287	-0.822163	0.0999513	-0.235571	0.438685	0.444176	-0.651637	-0.00353093	-0.671108	0.111327	-0.181282	0.403003	0.00740381	-0.333047	-0.329526	-0.38024	0.290789
-4.87024	-1.31476	1.4065	-0.13118	-0.316972	-0.148055	0.0448656	-0.540475	-0.653796	0.054545	0.431097	-0.303406	-0.28224	-0.426046	-0.00822922	0.158461	-0.424236	-0.0276331	0.205998	-0.326053	-0.704679	-0.132365	-0.351745	0.152276	0.282795	-0.52944	-0.183155	-0.0359986	-0.178197	0.00798961	0.00453965	0.598833	0.373137	0.0781431	-0.821084	0.0996521	-0.237159	0.438923	0.444672	-0.649954	-0.00239824	-0.671396	0.111292	-0.180886	0.404298	0.00845048	-0.333193	-0.330407	-0.380898	0.292495
-4.86926	-1.3152	1.4092	-0.130417	-0.31656	-0.146802	0.0455617	-0.542549	-0.651808	0.0539469	0.430597	-0.304287	-0.284229	-0.427705	-0.0065759	0.15749	-0.425839	-0.0262394	0.20478	-0.325811	-0.70347	-0.133772	-0.352536	0.153198	0.28244	-0.529092	-0.181946	-0.0375675	-0.177225	0.00814877	0.00503194	0.606214	0.371413	0.0800571	-0.820003	0.0993761	-0.238746	0.43915	0.445143	-0.648262	-0.00125534	-0.671672	0.111249	-0.180492	0.405593	0.009477	-0.33333	-0.331268	-0.381538	0.294192
-4.86827	-1.31564	1.41191	-0.129648	-0.316155	-0.145556	0.0462748	-0.5446	-0.649806	0.0533535	0.430111	-0.305158	-0.286212	-0.429374	-0.00493195	0.156497	-0.427454	-0.0248509	0.203561	-0.325557	-0.70226	-0.135163	-0.353325	0.154095	0.2821	-0.528742	-0.180731	-0.0391453	-0.176238	0.00830853	0.00550954	0.613588	0.369653	0.0819705	-0.818921	0.0991234	-0.240331	0.439368	0.44559	-0.64656	-0.000102485	-0.671936	0.111197	-0.180101	0.406887	0.0104834	-0.333459	-0.332108	-0.382158	0.295881
-4.86729	-1.31607	1.41463	-0.128875	-0.315758	-0.144317	0.0470052	-0.546629	-0.647791	0.0527651	0.429639	-0.306019	-0.288188	-0.431051	-0.00329761	0.155484	-0.42908	-0.0234676	0.202341	-0.325291	-0.701049	-0.136539	-0.354112	0.154969	0.281774	-0.528392	-0.179511	-0.040732	-0.175236	0.00846894	0.00597247	0.620957	0.367859	0.0838829	-0.817838	0.0988939	-0.241914	0.439575	0.446012	-0.644848	0.00106007	-0.672187	0.111136	-0.179712	0.408182	0.0114695	-0.333578	-0.332927	-0.38276	0.297561
-4.86631	-1.31651	1.41734	-0.128096	-0.315369	-0.143085	0.0477532	-0.548636	-0.645762	0.0521818	0.429181	-0.306869	-0.290157	-0.432737	-0.00167313	0.154449	-0.430719	-0.0220899	0.201119	-0.325011	-0.699837	-0.1379	-0.354896	0.155818	0.281462	-0.528041	-0.178286	-0.0423273	-0.174219	0.00863006	0.00642072	0.628318	0.36603	0.0857942	-0.816754	0.0986878	-0.243496	0.439772	0.446411	-0.643127	0.00223206	-0.672426	0.111067	-0.179326	0.409476	0.0124353	-0.333688	-0.333725	-0.383343	0.299233
-4.86532	-1.31695	1.42007	-0.127311	-0.314988	-0.141861	0.048519	-0.55062	-0.64372	0.0516037	0.428736	-0.307709	-0.292119	-0.434433	-5.87198e-05	0.153393	-0.432369	-0.0207176	0.199898	-0.32472	-0.698624	-0.139245	-0.355678	0.156643	0.281165	-0.527688	-0.177055	-0.0439313	-0.173188	0.00879194	0.00685428	0.635673	0.364167	0.0877042	-0.815669	0.0985051	-0.245076	0.439959	0.446785	-0.641397	0.00341323	-0.672654	0.110989	-0.178943	0.410769	0.0133809	-0.33379	-0.334502	-0.383907	0.300896
-4.86434	-1.31739	1.4228	-0.126522	-0.314614	-0.140644	0.0493029	-0.552582	-0.641665	0.051031	0.428306	-0.308538	-0.294073	-0.436136	0.00154537	0.152316	-0.434031	-0.0193511	0.198675	-0.324416	-0.697411	-0.140574	-0.356457	0.157444	0.280882	-0.527335	-0.175819	-0.045544	-0.172143	0.00895461	0.00727316	0.64302	0.362269	0.0896126	-0.814584	0.0983459	-0.246653	0.440136	0.447135	-0.639658	0.00460332	-0.672869	0.110903	-0.178562	0.412062	0.0143061	-0.333882	-0.335257	-0.384452	0.30255
-4.86336	-1.31783	1.42553	-0.125728	-0.314248	-0.139436	0.050105	-0.554522	-0.639597	0.0504639	0.427889	-0.309356	-0.296019	-0.437849	0.00313891	0.151219	-0.435703	-0.0179904	0.197452	-0.3241	-0.696197	-0.141888	-0.357233	0.15822	0.280613	-0.526982	-0.174578	-0.0471652	-0.171084	0.00911813	0.00767737	0.650359	0.360336	0.0915192	-0.813499	0.0982101	-0.248229	0.440302	0.447461	-0.63791	0.00580206	-0.673071	0.110808	-0.178184	0.413354	0.0152109	-0.333966	-0.335991	-0.384978	0.304195
-4.86237	-1.31828	1.42827	-0.124929	-0.31389	-0.138235	0.0509257	-0.55644	-0.637517	0.0499023	0.427486	-0.310163	-0.297957	-0.43957	0.00472166	0.150101	-0.437386	-0.0166356	0.19623	-0.323771	-0.694982	-0.143187	-0.358007	0.158972	0.280359	-0.526627	-0.173331	-0.0487948	-0.17001	0.00928254	0.00806691	0.65769	0.35837	0.0934238	-0.812413	0.0980979	-0.249803	0.440458	0.447763	-0.636153	0.0070092	-0.673262	0.110705	-0.177809	0.414644	0.0160954	-0.334042	-0.336703	-0.385485	0.30583
-4.86139	-1.31872	1.43101	-0.124125	-0.31354	-0.137042	0.0517652	-0.558335	-0.635424	0.0493466	0.427095	-0.310959	-0.299887	-0.441299	0.00629341	0.148962	-0.43908	-0.015287	0.195006	-0.323429	-0.693767	-0.14447	-0.358777	0.1597	0.28012	-0.526272	-0.17208	-0.0504328	-0.168923	0.00944789	0.00844179	0.665012	0.356369	0.095326	-0.811327	0.0980092	-0.251374	0.440604	0.448041	-0.634387	0.00822447	-0.673441	0.110594	-0.177437	0.415933	0.0169594	-0.334109	-0.337394	-0.385973	0.307455
-4.86041	-1.31916	1.43376	-0.123316	-0.313198	-0.135857	0.0526237	-0.560208	-0.633319	0.0487968	0.426719	-0.311743	-0.301807	-0.443037	0.00785391	0.147803	-0.440784	-0.0139445	0.193783	-0.323075	-0.692551	-0.145737	-0.359544	0.160403	0.279895	-0.525917	-0.170824	-0.0520791	-0.167822	0.00961423	0.00880202	0.672326	0.354334	0.0972258	-0.810241	0.0979442	-0.252944	0.440739	0.448296	-0.632613	0.0094476	-0.673607	0.110474	-0.177067	0.417221	0.017803	-0.334168	-0.338062	-0.386442	0.309071
-4.85943	-1.31961	1.43652	-0.122502	-0.312864	-0.134681	0.0535014	-0.56206	-0.631202	0.048253	0.426355	-0.312515	-0.303718	-0.444782	0.00940294	0.146623	-0.442497	-0.0126083	0.192561	-0.322708	-0.691336	-0.146989	-0.360307	0.161082	0.279685	-0.525562	-0.169563	-0.0537337	-0.166708	0.0097816	0.0091476	0.67963	0.352266	0.0991229	-0.809154	0.0979029	-0.254511	0.440863	0.448527	-0.630831	0.0106783	-0.673762	0.110346	-0.1767	0.418507	0.0186261	-0.334219	-0.338708	-0.386891	0.310676
-4.85844	-1.32006	1.43928	-0.121684	-0.312539	-0.133513	0.0543987	-0.563889	-0.629073	0.0477155	0.426004	-0.313276	-0.305618	-0.446535	0.0109403	0.145423	-0.444221	-0.0112786	0.191338	-0.322328	-0.69012	-0.148225	-0.361067	0.161736	0.279489	-0.525206	-0.168298	-0.0553964	-0.165581	0.00995005	0.00947856	0.686924	0.350165	0.101017	-0.808069	0.0978852	-0.256075	0.440977	0.448734	-0.62904	0.0119164	-0.673905	0.110211	-0.176336	0.419792	0.0194287	-0.334261	-0.339333	-0.387322	0.312271
-4.85746	-1.3205	1.44204	-0.120861	-0.312222	-0.132353	0.0553157	-0.565697	-0.626933	0.0471842	0.425666	-0.314025	-0.307509	-0.448296	0.0124657	0.144203	-0.445953	-0.00995543	0.190116	-0.321936	-0.688905	-0.149446	-0.361823	0.162367	0.279308	-0.52485	-0.167028	-0.0570671	-0.16444	0.0101196	0.00979491	0.694209	0.34803	0.102908	-0.806983	0.0978914	-0.257637	0.441081	0.448918	-0.627241	0.0131615	-0.674035	0.110067	-0.175976	0.421074	0.0202109	-0.334296	-0.339934	-0.387734	0.313855
-4.85648	-1.32095	1.44481	-0.120033	-0.311914	-0.131203	0.0562526	-0.567482	-0.624782	0.0466594	0.42534	-0.314761	-0.309389	-0.450065	0.013979	0.142963	-0.447695	-0.00863896	0.188895	-0.321531	-0.687689	-0.150651	-0.362576	0.162973	0.279141	-0.524494	-0.165754	-0.0587459	-0.163286	0.0102904	0.0100967	0.701483	0.345862	0.104795	-0.805898	0.0979213	-0.259196	0.441174	0.449079	-0.625434	0.0144134	-0.674154	0.109916	-0.175618	0.422354	0.0209725	-0.334322	-0.340514	-0.388127	0.315429
-4.85549	-1.3214	1.44759	-0.1192	-0.311614	-0.130061	0.0572097	-0.569246	-0.622619	0.0461411	0.425027	-0.315485	-0.311259	-0.451841	0.0154799	0.141704	-0.449446	-0.0073293	0.187674	-0.321113	-0.686474	-0.151841	-0.363324	0.163554	0.27899	-0.524139	-0.164476	-0.0604325	-0.16212	0.0104623	0.0103838	0.708746	0.343661	0.106679	-0.804813	0.0979751	-0.260753	0.441257	0.449216	-0.62362	0.0156719	-0.674261	0.109756	-0.175263	0.423632	0.0217135	-0.334341	-0.34107	-0.388501	0.316991
-4.85451	-1.32185	1.45037	-0.118364	-0.311322	-0.128928	0.0581873	-0.570988	-0.620446	0.0456295	0.424727	-0.316197	-0.313117	-0.453625	0.0169682	0.140424	-0.451205	-0.00602656	0.186455	-0.320682	-0.68526	-0.153015	-0.364068	0.164112	0.278853	-0.523783	-0.163193	-0.0621269	-0.160941	0.0106355	0.0106565	0.715999	0.341428	0.108559	-0.803729	0.0980528	-0.262307	0.441328	0.449331	-0.621798	0.0169366	-0.674356	0.109589	-0.174912	0.424908	0.022434	-0.334352	-0.341604	-0.388856	0.318543
-4.85353	-1.3223	1.45316	-0.117522	-0.311039	-0.127804	0.0591855	-0.572709	-0.618262	0.0451247	0.424438	-0.316896	-0.314963	-0.455415	0.0184437	0.139125	-0.452972	-0.00473087	0.185236	-0.320238	-0.684045	-0.154174	-0.364808	0.164645	0.278731	-0.523428	-0.161907	-0.063829	-0.159749	0.01081	0.0109146	0.723239	0.339162	0.110435	-0.802646	0.0981544	-0.263858	0.44139	0.449422	-0.619968	0.0182072	-0.674439	0.109414	-0.174563	0.42618	0.023134	-0.334355	-0.342115	-0.389192	0.320083
-4.85254	-1.32275	1.45596	-0.116677	-0.310765	-0.12669	0.0602046	-0.574408	-0.616068	0.0446269	0.424162	-0.317582	-0.316797	-0.457213	0.0199062	0.137806	-0.454747	-0.00344235	0.184019	-0.319782	-0.682832	-0.155318	-0.365544	0.165153	0.278624	-0.523073	-0.160617	-0.0655388	-0.158545	0.0109859	0.0111581	0.730469	0.336864	0.112306	-0.801564	0.0982799	-0.265406	0.44144	0.44949	-0.618131	0.0194836	-0.67451	0.109232	-0.174218	0.42745	0.0238134	-0.334351	-0.342603	-0.389509	0.321611
-4.85156	-1.3232	1.45876	-0.115827	-0.3105	-0.125585	0.0612448	-0.576086	-0.613863	0.0441361	0.423898	-0.318255	-0.318619	-0.459017	0.0213555	0.136469	-0.45653	-0.0021611	0.182803	-0.319312	-0.681619	-0.156446	-0.366275	0.165638	0.278531	-0.522719	-0.159323	-0.0672561	-0.157329	0.0111631	0.0113872	0.737685	0.334534	0.114173	-0.800483	0.0984295	-0.266951	0.44148	0.449536	-0.616287	0.0207654	-0.67457	0.109042	-0.173876	0.428717	0.0244723	-0.334339	-0.343067	-0.389807	0.323128
-4.85058	-1.32366	1.46156	-0.114972	-0.310243	-0.124489	0.0623063	-0.577742	-0.611649	0.0436525	0.423646	-0.318915	-0.320429	-0.460828	0.0227913	0.135112	-0.45832	-0.000887247	0.181588	-0.31883	-0.680407	-0.157558	-0.367001	0.166098	0.278453	-0.522365	-0.158026	-0.0689808	-0.156102	0.0113418	0.0116019	0.74489	0.332172	0.116035	-0.799403	0.0986031	-0.268493	0.441509	0.449559	-0.614436	0.0220524	-0.674618	0.108845	-0.173538	0.429981	0.0251106	-0.334321	-0.343509	-0.390086	0.324632
-4.84959	-1.32411	1.46437	-0.114114	-0.309996	-0.123403	0.0633893	-0.579377	-0.609425	0.0431762	0.423405	-0.319561	-0.322225	-0.462646	0.0242134	0.133736	-0.460117	0.000379097	0.180375	-0.318334	-0.679195	-0.158655	-0.367723	0.166535	0.27839	-0.522012	-0.156725	-0.0707128	-0.154862	0.011522	0.0118021	0.752081	0.329779	0.117893	-0.798325	0.0988008	-0.270032	0.441527	0.449559	-0.612577	0.0233443	-0.674655	0.10864	-0.173202	0.431242	0.0257283	-0.334295	-0.343926	-0.390346	0.326125
-4.84861	-1.32456	1.46719	-0.113251	-0.309757	-0.122326	0.0644941	-0.580991	-0.607191	0.0427072	0.423176	-0.320194	-0.324008	-0.46447	0.0256217	0.132341	-0.46192	0.00163782	0.179164	-0.317826	-0.677985	-0.159737	-0.368439	0.166947	0.278342	-0.521659	-0.155421	-0.0724522	-0.153611	0.0117036	0.0119879	0.75926	0.327354	0.119744	-0.797248	0.0990226	-0.271568	0.441535	0.449537	-0.610712	0.0246408	-0.674679	0.108428	-0.172871	0.432499	0.0263255	-0.334261	-0.344321	-0.390587	0.327604
-4.84763	-1.32502	1.47002	-0.112384	-0.309527	-0.12126	0.0656209	-0.582584	-0.604949	0.0422458	0.422958	-0.320813	-0.325777	-0.4663	0.0270159	0.130927	-0.463731	0.0028888	0.177955	-0.317305	-0.676776	-0.160803	-0.36915	0.167335	0.278309	-0.521308	-0.154113	-0.0741986	-0.152349	0.0118869	0.0121594	0.766425	0.324898	0.121591	-0.796172	0.0992686	-0.2731	0.441532	0.449493	-0.608841	0.0259416	-0.674693	0.108209	-0.172542	0.433752	0.0269022	-0.334221	-0.344692	-0.390809	0.329072
-4.84665	-1.32547	1.47285	-0.111514	-0.309307	-0.120203	0.0667698	-0.584156	-0.602697	0.041792	0.422751	-0.321419	-0.327532	-0.468136	0.0283958	0.129495	-0.465547	0.00413195	0.176747	-0.31677	-0.675568	-0.161854	-0.369857	0.167698	0.278291	-0.520957	-0.152803	-0.0759521	-0.151075	0.0120717	0.0123165	0.773576	0.322411	0.123431	-0.795098	0.0995387	-0.274629	0.441518	0.449427	-0.606963	0.0272465	-0.674694	0.107983	-0.172217	0.435001	0.0274583	-0.334174	-0.345039	-0.391012	0.330526
-4.84566	-1.32593	1.47568	-0.110639	-0.309095	-0.119156	0.0679411	-0.585707	-0.600436	0.0413459	0.422556	-0.32201	-0.329272	-0.469978	0.0297612	0.128045	-0.467369	0.00536713	0.175542	-0.316223	-0.674362	-0.16289	-0.370558	0.168038	0.278287	-0.520608	-0.15149	-0.0777125	-0.149791	0.0122581	0.0124593	0.780712	0.319894	0.125266	-0.794026	0.0998331	-0.276155	0.441493	0.449338	-0.605078	0.0285552	-0.674685	0.10775	-0.171896	0.436246	0.0279939	-0.334121	-0.345362	-0.391197	0.331967
-4.84468	-1.32639	1.47852	-0.109761	-0.308893	-0.11812	0.069135	-0.587238	-0.598167	0.0409076	0.422371	-0.322587	-0.330998	-0.471826	0.0311119	0.126576	-0.469196	0.00659425	0.174339	-0.315662	-0.673157	-0.16391	-0.371253	0.168354	0.278298	-0.520259	-0.150173	-0.0794798	-0.148496	0.0124463	0.0125879	0.787835	0.317346	0.127095	-0.792956	0.100152	-0.277677	0.441457	0.449228	-0.603188	0.0298675	-0.674664	0.10751	-0.171579	0.437487	0.0285091	-0.33406	-0.345661	-0.391362	0.333395
-4.8437	-1.32684	1.48137	-0.108879	-0.3087	-0.117093	0.0703518	-0.588747	-0.59589	0.0404773	0.422197	-0.32315	-0.332708	-0.473679	0.0324477	0.125089	-0.471029	0.0078132	0.173139	-0.315088	-0.671953	-0.164915	-0.371943	0.168646	0.278324	-0.519912	-0.148855	-0.0812539	-0.14719	0.0126362	0.0127023	0.794942	0.314768	0.128917	-0.791888	0.100495	-0.279195	0.441411	0.449096	-0.601291	0.0311829	-0.674631	0.107263	-0.171265	0.438724	0.0290037	-0.333993	-0.345936	-0.391509	0.33481
-4.84271	-1.3273	1.48423	-0.107993	-0.308516	-0.116078	0.0715915	-0.590237	-0.593604	0.040055	0.422033	-0.323699	-0.334403	-0.475538	0.0337684	0.123584	-0.472867	0.00902387	0.171941	-0.314501	-0.670751	-0.165905	-0.372627	0.168915	0.278365	-0.519566	-0.147533	-0.0830345	-0.145874	0.0128278	0.0128025	0.802034	0.31216	0.130732	-0.790823	0.100862	-0.28071	0.441354	0.448942	-0.599388	0.0325014	-0.674587	0.107009	-0.170955	0.439955	0.0294779	-0.33392	-0.346186	-0.391636	0.336211
-4.84173	-1.32776	1.48709	-0.107103	-0.308341	-0.115072	0.0728544	-0.591705	-0.591311	0.0396409	0.42188	-0.324233	-0.336082	-0.477402	0.0350738	0.122062	-0.474709	0.0102262	0.170746	-0.313901	-0.669551	-0.16688	-0.373305	0.169159	0.27842	-0.519222	-0.14621	-0.0848217	-0.144548	0.0130212	0.0128886	0.80911	0.309522	0.132541	-0.789759	0.101254	-0.282221	0.441285	0.448767	-0.59748	0.0338225	-0.674533	0.106749	-0.170648	0.441182	0.0299316	-0.333841	-0.346413	-0.391745	0.337598
-4.84075	-1.32822	1.48995	-0.10621	-0.308176	-0.114077	0.0741408	-0.593154	-0.58901	0.039235	0.421737	-0.324752	-0.337745	-0.479271	0.0363638	0.120522	-0.476556	0.01142	0.169554	-0.313288	-0.668352	-0.16784	-0.373977	0.16938	0.278491	-0.518879	-0.144884	-0.0866153	-0.143211	0.0132165	0.0129605	0.816171	0.306855	0.134343	-0.788698	0.10167	-0.283728	0.441206	0.448571	-0.595566	0.0351461	-0.674466	0.106482	-0.170346	0.442404	0.0303649	-0.333755	-0.346615	-0.391835	0.338971
-4.83976	-1.32868	1.49283	-0.105313	-0.30802	-0.113093	0.0754507	-0.594582	-0.586702	0.0388374	0.421605	-0.325256	-0.339391	-0.481145	0.037638	0.118965	-0.478406	0.0126052	0.168365	-0.312662	-0.667156	-0.168784	-0.374643	0.169577	0.278576	-0.518538	-0.143556	-0.0884152	-0.141866	0.0134136	0.0130185	0.823215	0.304159	0.136137	-0.78764	0.10211	-0.285231	0.441116	0.448353	-0.593647	0.0364718	-0.674389	0.106208	-0.170047	0.443621	0.0307779	-0.333663	-0.346792	-0.391907	0.34033
-4.83878	-1.32914	1.49571	-0.104413	-0.307873	-0.112119	0.0767844	-0.59599	-0.584387	0.0384483	0.421482	-0.325745	-0.34102	-0.483024	0.0388964	0.11739	-0.48026	0.0137817	0.167179	-0.312022	-0.665961	-0.169714	-0.375303	0.169751	0.278675	-0.518198	-0.142226	-0.0902213	-0.14051	0.0136127	0.0130624	0.830242	0.301435	0.137924	-0.786584	0.102575	-0.28673	0.441015	0.448114	-0.591722	0.0377994	-0.674301	0.105929	-0.169752	0.444833	0.0311704	-0.333565	-0.346945	-0.391959	0.341675
-4.8378	-1.3296	1.49859	-0.103509	-0.307736	-0.111156	0.0781421	-0.597379	-0.582064	0.0380677	0.421369	-0.326219	-0.342632	-0.484907	0.0401387	0.115799	-0.482118	0.0149494	0.165996	-0.311369	-0.664769	-0.170628	-0.375957	0.169901	0.27879	-0.51786	-0.140894	-0.0920335	-0.139145	0.0138137	0.0130924	0.837253	0.298681	0.139703	-0.785531	0.103064	-0.288225	0.440903	0.447855	-0.589792	0.0391286	-0.674202	0.105643	-0.169462	0.446038	0.0315427	-0.333461	-0.347074	-0.391993	0.343005
-4.83682	-1.33006	1.50148	-0.102603	-0.307609	-0.110205	0.0795239	-0.598747	-0.579736	0.0376957	0.421265	-0.326678	-0.344227	-0.486795	0.0413648	0.11419	-0.483978	0.0161083	0.164817	-0.310703	-0.663579	-0.171528	-0.376604	0.170027	0.278919	-0.517524	-0.139561	-0.0938516	-0.137771	0.0140167	0.0131085	0.844247	0.2959	0.141474	-0.78448	0.103578	-0.289715	0.44078	0.447574	-0.587857	0.0404591	-0.674092	0.105351	-0.169175	0.447239	0.0318947	-0.333352	-0.347177	-0.392008	0.34432
-4.83583	-1.33051	1.50438	-0.101692	-0.30749	-0.109264	0.0809302	-0.600096	-0.5774	0.0373324	0.421171	-0.327121	-0.345803	-0.488687	0.0425745	0.112565	-0.485841	0.0172581	0.163641	-0.310024	-0.662391	-0.172412	-0.377244	0.170131	0.279063	-0.51719	-0.138226	-0.0956756	-0.136389	0.0142217	0.0131108	0.851222	0.29309	0.143237	-0.783433	0.104116	-0.291202	0.440646	0.447273	-0.585918	0.0417907	-0.673971	0.105052	-0.168893	0.448433	0.0322264	-0.333237	-0.347256	-0.392005	0.34562
-4.83485	-1.33097	1.50729	-0.100779	-0.307382	-0.108334	0.0823609	-0.601425	-0.575059	0.0369779	0.421087	-0.327548	-0.347362	-0.490582	0.0437676	0.110924	-0.487707	0.0183989	0.162468	-0.309332	-0.661206	-0.173282	-0.377878	0.170211	0.279221	-0.516858	-0.136889	-0.0975053	-0.134997	0.0144288	0.0130993	0.85818	0.290252	0.144992	-0.782389	0.104679	-0.292684	0.440501	0.446952	-0.583973	0.043123	-0.673839	0.104748	-0.168615	0.449621	0.0325379	-0.333116	-0.347309	-0.391983	0.346905
-4.83387	-1.33143	1.5102	-0.0998631	-0.307283	-0.107416	0.0838163	-0.602735	-0.572711	0.0366323	0.421011	-0.32796	-0.348901	-0.492482	0.0449438	0.109266	-0.489575	0.0195305	0.1613	-0.308626	-0.660023	-0.174136	-0.378505	0.170268	0.279394	-0.516528	-0.135552	-0.0993407	-0.133597	0.014638	0.0130741	0.86512	0.287388	0.146738	-0.781348	0.105267	-0.294162	0.440345	0.44661	-0.582025	0.0444559	-0.673697	0.104438	-0.168341	0.450803	0.0328292	-0.33299	-0.347338	-0.391942	0.348175
-4.83288	-1.33189	1.51311	-0.0989439	-0.307193	-0.106508	0.0852967	-0.604025	-0.570358	0.0362957	0.420944	-0.328356	-0.350422	-0.494385	0.0461032	0.107592	-0.491444	0.0206528	0.160135	-0.307907	-0.658842	-0.174976	-0.379125	0.170302	0.279581	-0.5162	-0.134213	-0.101182	-0.132189	0.0148494	0.0130351	0.872041	0.284496	0.148475	-0.780311	0.105879	-0.295636	0.440178	0.446248	-0.580071	0.045789	-0.673544	0.104122	-0.168071	0.451978	0.0331004	-0.332858	-0.347341	-0.391883	0.349429
-4.8319	-1.33235	1.51603	-0.0980217	-0.307113	-0.105612	0.0868021	-0.605297	-0.568	0.035968	0.420886	-0.328735	-0.351924	-0.496292	0.0472453	0.105903	-0.493315	0.0217658	0.158975	-0.307175	-0.657665	-0.175802	-0.379738	0.170313	0.279783	-0.515875	-0.132873	-0.103028	-0.130773	0.0150628	0.0129826	0.878944	0.281577	0.150203	-0.779276	0.106516	-0.297104	0.44	0.445867	-0.578114	0.047122	-0.67338	0.103801	-0.167805	0.453146	0.0333516	-0.332722	-0.347319	-0.391805	0.350668
-4.83092	-1.33281	1.51896	-0.0970968	-0.307043	-0.104728	0.0883327	-0.606549	-0.565636	0.0356496	0.420836	-0.329099	-0.353406	-0.498202	0.0483702	0.104197	-0.495187	0.0228693	0.157818	-0.306429	-0.65649	-0.176612	-0.380344	0.170301	0.279999	-0.515551	-0.131532	-0.104879	-0.129349	0.0152785	0.0129165	0.885827	0.278632	0.151922	-0.778246	0.107177	-0.298569	0.439811	0.445465	-0.576152	0.0484548	-0.673206	0.103474	-0.167544	0.454308	0.0335827	-0.33258	-0.347272	-0.391709	0.35189
-4.82993	-1.33327	1.5219	-0.096169	-0.306982	-0.103855	0.0898887	-0.607783	-0.563267	0.0353403	0.420795	-0.329446	-0.354868	-0.500116	0.0494776	0.102476	-0.49706	0.0239633	0.156666	-0.305671	-0.655317	-0.177408	-0.380942	0.170266	0.28023	-0.515231	-0.130191	-0.106736	-0.127917	0.0154965	0.0128369	0.89269	0.27566	0.153632	-0.777219	0.107863	-0.300028	0.439611	0.445044	-0.574187	0.0497869	-0.673022	0.103141	-0.167288	0.455463	0.0337938	-0.332434	-0.347199	-0.391594	0.353097
-4.82895	-1.33373	1.52484	-0.0952387	-0.306931	-0.102993	0.0914703	-0.608998	-0.560893	0.0350403	0.420762	-0.329777	-0.35631	-0.502032	0.0505673	0.10074	-0.498933	0.0250477	0.155518	-0.304899	-0.654148	-0.17819	-0.381534	0.170209	0.280475	-0.514912	-0.128849	-0.108597	-0.126478	0.0157167	0.0127439	0.899534	0.272663	0.155331	-0.776196	0.108574	-0.301483	0.4394	0.444603	-0.572217	0.0511182	-0.672827	0.102803	-0.167036	0.45661	0.033985	-0.332282	-0.347101	-0.391461	0.354287
-4.82797	-1.33419	1.52779	-0.0943057	-0.306889	-0.102144	0.0930777	-0.610194	-0.558515	0.0347496	0.420737	-0.330091	-0.357731	-0.503951	0.0516393	0.0989891	-0.500806	0.0261224	0.154375	-0.304114	-0.652982	-0.178957	-0.382117	0.170129	0.280734	-0.514597	-0.127507	-0.110464	-0.125032	0.0159391	0.0126376	0.906358	0.269639	0.157021	-0.775177	0.109309	-0.302933	0.439178	0.444144	-0.570244	0.0524484	-0.672622	0.10246	-0.166789	0.45775	0.0341564	-0.332126	-0.346978	-0.39131	0.355461
-4.82698	-1.33465	1.53074	-0.0933702	-0.306857	-0.101305	0.0947109	-0.611372	-0.556133	0.0344683	0.42072	-0.330389	-0.359131	-0.505873	0.0526933	0.0972231	-0.50268	0.0271872	0.153237	-0.303315	-0.651819	-0.179709	-0.382693	0.170027	0.281008	-0.514284	-0.126164	-0.112335	-0.123579	0.016164	0.0125179	0.913161	0.266591	0.158701	-0.774162	0.110069	-0.304378	0.438945	0.443665	-0.568268	0.0537773	-0.672406	0.102111	-0.166546	0.458882	0.0343079	-0.331965	-0.346829	-0.39114	0.356618
-4.826	-1.33511	1.5337	-0.0924323	-0.306835	-0.100479	0.0963701	-0.612531	-0.553746	0.0341966	0.420711	-0.33067	-0.36051	-0.507797	0.0537291	0.0954424	-0.504552	0.0282422	0.152103	-0.302503	-0.650659	-0.180447	-0.383261	0.169902	0.281295	-0.513973	-0.124821	-0.114211	-0.12212	0.0163912	0.012385	0.919944	0.263517	0.16037	-0.773151	0.110854	-0.305819	0.438701	0.443167	-0.566288	0.0551044	-0.672181	0.101758	-0.166308	0.460007	0.0344397	-0.3318	-0.346654	-0.390952	0.357758
-4.82502	-1.33556	1.53667	-0.0914921	-0.306823	-0.0996645	0.0980555	-0.613673	-0.551356	0.0339343	0.420709	-0.330934	-0.361868	-0.509723	0.0547467	0.0936474	-0.506424	0.0292873	0.150974	-0.301679	-0.649502	-0.181171	-0.383822	0.169756	0.281597	-0.513666	-0.123479	-0.116091	-0.120654	0.0166207	0.0122389	0.926705	0.260419	0.162029	-0.772144	0.111664	-0.307254	0.438446	0.44265	-0.564305	0.0564297	-0.671945	0.101399	-0.166075	0.461123	0.0345519	-0.33163	-0.346454	-0.390746	0.358882
-4.82404	-1.33602	1.53964	-0.0905496	-0.30682	-0.0988618	0.0997673	-0.614796	-0.548962	0.0336817	0.420714	-0.331181	-0.363204	-0.511651	0.0557458	0.0918381	-0.508295	0.0303223	0.14985	-0.30084	-0.648349	-0.18188	-0.384374	0.169587	0.281913	-0.513361	-0.122136	-0.117976	-0.119181	0.0168527	0.0120797	0.933445	0.257297	0.163678	-0.771142	0.112499	-0.308684	0.43818	0.442115	-0.562319	0.0577528	-0.6717	0.101036	-0.165846	0.462231	0.0346444	-0.331456	-0.346228	-0.390522	0.359988
-4.82305	-1.33648	1.54261	-0.0896049	-0.306827	-0.0980711	0.101506	-0.615902	-0.546565	0.0334388	0.420727	-0.331411	-0.364518	-0.513581	0.0567263	0.0900148	-0.510165	0.0313472	0.148732	-0.299989	-0.647199	-0.182576	-0.384919	0.169396	0.282243	-0.51306	-0.120794	-0.119865	-0.117703	0.0170872	0.0119076	0.940164	0.25415	0.165315	-0.770144	0.113358	-0.310109	0.437903	0.441561	-0.56033	0.0590734	-0.671445	0.100667	-0.165623	0.463331	0.0347173	-0.331278	-0.345976	-0.39028	0.361077
-4.82207	-1.33693	1.5456	-0.0886581	-0.306843	-0.0972924	0.103271	-0.61699	-0.544165	0.0332056	0.420746	-0.331623	-0.36581	-0.515513	0.0576881	0.0881777	-0.512032	0.0323619	0.147618	-0.299125	-0.646053	-0.183257	-0.385455	0.169183	0.282586	-0.512761	-0.119452	-0.121758	-0.116219	0.0173241	0.0117224	0.946861	0.25098	0.166941	-0.769151	0.114242	-0.311528	0.437615	0.440989	-0.558339	0.0603913	-0.67118	0.100294	-0.165404	0.464422	0.0347708	-0.331095	-0.345698	-0.390019	0.362149
-4.82109	-1.33739	1.54859	-0.0877094	-0.306869	-0.0965257	0.105062	-0.618061	-0.541761	0.0329823	0.420772	-0.331819	-0.367078	-0.517446	0.058631	0.086327	-0.513898	0.0333664	0.14651	-0.298247	-0.64491	-0.183924	-0.385984	0.168949	0.282944	-0.512466	-0.118111	-0.123655	-0.114729	0.0175636	0.0115244	0.953535	0.247786	0.168556	-0.768162	0.115151	-0.312943	0.437316	0.440399	-0.556344	0.0617063	-0.670905	0.099917	-0.16519	0.465505	0.0348049	-0.330909	-0.345394	-0.389741	0.363203
-4.8201	-1.33784	1.55158	-0.0867587	-0.306905	-0.0957712	0.106881	-0.619114	-0.539356	0.0327687	0.420805	-0.331996	-0.368324	-0.519381	0.0595549	0.084463	-0.515761	0.0343605	0.145408	-0.297356	-0.643771	-0.184578	-0.386504	0.168693	0.283315	-0.512174	-0.11677	-0.125555	-0.113234	0.0178055	0.0113136	0.960187	0.24457	0.170159	-0.767178	0.116085	-0.314352	0.437006	0.439791	-0.554348	0.063018	-0.670621	0.0995351	-0.164982	0.466578	0.0348197	-0.330719	-0.345064	-0.389444	0.364239
-4.81912	-1.3383	1.55458	-0.0858062	-0.30695	-0.0950287	0.108726	-0.62015	-0.536947	0.0325651	0.420844	-0.332157	-0.369546	-0.521317	0.0604596	0.0825859	-0.517622	0.0353443	0.144311	-0.296452	-0.642636	-0.185217	-0.387015	0.168416	0.2837	-0.511885	-0.115431	-0.12746	-0.111734	0.0180501	0.0110901	0.966816	0.24133	0.17175	-0.766199	0.117044	-0.315755	0.436684	0.439166	-0.552349	0.0643262	-0.670327	0.0991489	-0.164778	0.467643	0.0348152	-0.330525	-0.344709	-0.38913	0.365257
-4.81814	-1.33875	1.55759	-0.084852	-0.307005	-0.0942985	0.110599	-0.62117	-0.534537	0.0323714	0.42089	-0.332299	-0.370745	-0.523253	0.0613451	0.0806959	-0.519479	0.0363176	0.14322	-0.295535	-0.641505	-0.185843	-0.387518	0.168117	0.284099	-0.511599	-0.114092	-0.129368	-0.110229	0.0182972	0.010854	0.973422	0.238069	0.17333	-0.765225	0.118027	-0.317153	0.436352	0.438523	-0.550348	0.0656307	-0.670024	0.0987584	-0.16458	0.468697	0.0347916	-0.330328	-0.344327	-0.388798	0.366258
-4.81715	-1.3392	1.5606	-0.0838961	-0.30707	-0.0935805	0.112499	-0.622172	-0.532125	0.0321878	0.420941	-0.332424	-0.37192	-0.525191	0.062211	0.0787933	-0.521333	0.0372803	0.142135	-0.294605	-0.640377	-0.186455	-0.388012	0.167798	0.284511	-0.511317	-0.112755	-0.131279	-0.108719	0.0185469	0.0106053	0.980005	0.234785	0.174897	-0.764256	0.119036	-0.318546	0.436009	0.437862	-0.548344	0.0669312	-0.669711	0.0983638	-0.164387	0.469743	0.0347488	-0.330127	-0.343919	-0.388448	0.36724
-4.81617	-1.33965	1.56362	-0.0829387	-0.307144	-0.0928747	0.114427	-0.623158	-0.529711	0.0320142	0.420998	-0.332531	-0.373071	-0.527129	0.0630574	0.0768782	-0.523184	0.0382325	0.141056	-0.293661	-0.639254	-0.187053	-0.388498	0.167457	0.284937	-0.511038	-0.111419	-0.133194	-0.107206	0.0187993	0.0103441	0.986564	0.231479	0.176452	-0.763292	0.120069	-0.319932	0.435655	0.437185	-0.546339	0.0682274	-0.669389	0.0979651	-0.164199	0.470779	0.0346871	-0.329923	-0.343485	-0.38808	0.368203
-4.81519	-1.3401	1.56664	-0.0819798	-0.307228	-0.0921813	0.116382	-0.624127	-0.527295	0.0318507	0.421061	-0.33262	-0.374197	-0.529067	0.0638841	0.0749509	-0.52503	0.039174	0.139982	-0.292705	-0.638134	-0.187638	-0.388975	0.167096	0.285376	-0.510763	-0.110084	-0.135111	-0.105688	0.0190543	0.0100705	0.993099	0.228153	0.177995	-0.762333	0.121127	-0.321313	0.43529	0.436491	-0.544333	0.0695191	-0.669058	0.0975625	-0.164017	0.471805	0.0346065	-0.329715	-0.343025	-0.387695	0.369148
-4.81421	-1.34054	1.56967	-0.0810196	-0.307321	-0.0915002	0.118365	-0.625081	-0.524878	0.0316974	0.42113	-0.332691	-0.375299	-0.531006	0.064691	0.0730117	-0.526872	0.0401048	0.138916	-0.291735	-0.637019	-0.188209	-0.389443	0.166714	0.285828	-0.510491	-0.108752	-0.137032	-0.104166	0.0193121	0.00978456	0.999609	0.224805	0.179524	-0.76138	0.122211	-0.322688	0.434914	0.435779	-0.542325	0.070806	-0.668718	0.0971561	-0.16384	0.47282	0.034507	-0.329505	-0.342539	-0.387292	0.370074
-4.81322	-1.34099	1.57271	-0.080058	-0.307424	-0.0908315	0.120375	-0.626018	-0.522461	0.0315542	0.421203	-0.332743	-0.376375	-0.532944	0.065478	0.0710607	-0.52871	0.0410248	0.137855	-0.290753	-0.635908	-0.188767	-0.389902	0.166311	0.286293	-0.510223	-0.10742	-0.138956	-0.10264	0.0195725	0.00948643	1.0061	0.221437	0.181041	-0.760432	0.123319	-0.324058	0.434526	0.435052	-0.540315	0.072088	-0.66837	0.096746	-0.163669	0.473826	0.0343888	-0.329291	-0.342027	-0.386872	0.370981
-4.81224	-1.34143	1.57575	-0.0790953	-0.307536	-0.0901751	0.122414	-0.626939	-0.520042	0.0314213	0.421282	-0.332778	-0.377426	-0.534882	0.0662448	0.0690982	-0.530542	0.041934	0.136801	-0.289757	-0.634801	-0.189311	-0.390352	0.165888	0.286772	-0.509959	-0.106091	-0.140882	-0.101111	0.0198357	0.00917615	1.01256	0.218048	0.182545	-0.75949	0.124452	-0.325421	0.434128	0.434308	-0.538304	0.0733646	-0.668012	0.0963323	-0.163503	0.474821	0.0342519	-0.329074	-0.341488	-0.386434	0.37187
-4.81126	-1.34188	1.57879	-0.0781315	-0.307658	-0.0895312	0.12448	-0.627844	-0.517623	0.0312986	0.421366	-0.332794	-0.378452	-0.53682	0.0669915	0.0671244	-0.532369	0.0428323	0.135753	-0.288749	-0.633698	-0.189843	-0.390793	0.165445	0.287263	-0.509698	-0.104764	-0.142811	-0.0995794	0.0201016	0.00885382	1.01899	0.21464	0.184035	-0.758554	0.12561	-0.326778	0.433719	0.433548	-0.536292	0.0746358	-0.667645	0.0959151	-0.163343	0.475805	0.0340965	-0.328855	-0.340923	-0.385979	0.372739
-4.81027	-1.34232	1.58184	-0.0771667	-0.307789	-0.0888998	0.126575	-0.628734	-0.515203	0.0311862	0.421454	-0.332792	-0.379452	-0.538758	0.0677179	0.0651397	-0.534191	0.0437197	0.134712	-0.287728	-0.6326	-0.190361	-0.391225	0.164982	0.287768	-0.509442	-0.103439	-0.144742	-0.0980445	0.0203703	0.00851953	1.02541	0.211211	0.185512	-0.757623	0.126793	-0.32813	0.433299	0.432772	-0.534279	0.0759011	-0.66727	0.0954945	-0.163188	0.476779	0.0339227	-0.328632	-0.340332	-0.385507	0.373589
-4.80929	-1.34276	1.5849	-0.076201	-0.30793	-0.0882807	0.128698	-0.629608	-0.512784	0.0310841	0.421548	-0.332771	-0.380425	-0.540694	0.0684239	0.0631441	-0.536006	0.044596	0.133678	-0.286693	-0.631507	-0.190866	-0.391647	0.164499	0.288285	-0.509189	-0.102116	-0.146675	-0.0965068	0.0206418	0.00817336	1.03179	0.207764	0.186975	-0.756698	0.128	-0.329475	0.432868	0.43198	-0.532265	0.0771605	-0.666886	0.0950707	-0.163039	0.477741	0.0337305	-0.328407	-0.339714	-0.385017	0.374419
-4.80831	-1.34319	1.58796	-0.0752345	-0.30808	-0.0876742	0.130849	-0.630468	-0.510364	0.0309925	0.421645	-0.332732	-0.381373	-0.54263	0.0691094	0.0611381	-0.537816	0.0454614	0.132651	-0.285646	-0.630418	-0.191359	-0.39206	0.163996	0.288815	-0.50894	-0.100796	-0.148611	-0.0949668	0.0209161	0.00781541	1.03815	0.204298	0.188424	-0.755779	0.129233	-0.330814	0.432427	0.431173	-0.530251	0.0784137	-0.666494	0.0946437	-0.162897	0.478692	0.0335201	-0.32818	-0.33907	-0.384511	0.37523
-4.80732	-1.34363	1.59103	-0.0742672	-0.308239	-0.0870802	0.133028	-0.631312	-0.507945	0.0309111	0.421746	-0.332674	-0.382293	-0.544564	0.0697742	0.0591217	-0.539618	0.0463156	0.131631	-0.284586	-0.629333	-0.191838	-0.392464	0.163474	0.289357	-0.508695	-0.0994782	-0.150548	-0.0934245	0.0211932	0.00744577	1.04449	0.200814	0.189859	-0.754866	0.130491	-0.332146	0.431974	0.430351	-0.528236	0.0796603	-0.666093	0.0942136	-0.162759	0.479632	0.0332915	-0.32795	-0.3384	-0.383987	0.37602
-4.80634	-1.34406	1.5941	-0.0732994	-0.308408	-0.0864987	0.135236	-0.632142	-0.505527	0.0308402	0.421852	-0.332598	-0.383187	-0.546497	0.0704183	0.0570952	-0.541414	0.0471588	0.130618	-0.283514	-0.628254	-0.192305	-0.392858	0.162932	0.289912	-0.508455	-0.0981634	-0.152487	-0.0918803	0.0214732	0.00706453	1.05079	0.197311	0.191279	-0.753959	0.131773	-0.333473	0.43151	0.429513	-0.526221	0.0809002	-0.665684	0.0937806	-0.162628	0.480561	0.0330449	-0.327718	-0.337704	-0.383446	0.376792
-4.80536	-1.34449	1.59717	-0.0723311	-0.308586	-0.0859297	0.137472	-0.632956	-0.503109	0.0307798	0.421961	-0.332503	-0.384053	-0.548429	0.0710416	0.055059	-0.543203	0.0479907	0.129612	-0.282428	-0.627179	-0.192759	-0.393242	0.162371	0.29048	-0.508218	-0.0968515	-0.154428	-0.0903344	0.0217561	0.00667178	1.05707	0.193791	0.192686	-0.753059	0.133081	-0.334793	0.431036	0.42866	-0.524205	0.0821332	-0.665267	0.0933447	-0.162503	0.481477	0.0327803	-0.327483	-0.336981	-0.382888	0.377543
-4.80438	-1.34492	1.60025	-0.0713623	-0.308773	-0.0853732	0.139737	-0.633757	-0.500692	0.0307298	0.422074	-0.332388	-0.384892	-0.550358	0.071644	0.0530132	-0.544984	0.0488115	0.128614	-0.28133	-0.626108	-0.193201	-0.393617	0.161791	0.291059	-0.507986	-0.0955426	-0.156371	-0.088787	0.0220418	0.00626763	1.06333	0.190253	0.194077	-0.752164	0.134413	-0.336106	0.430551	0.427793	-0.522189	0.083359	-0.664842	0.0929061	-0.162384	0.482382	0.032498	-0.327247	-0.336232	-0.382313	0.378274
-4.80339	-1.34535	1.60334	-0.0703932	-0.308969	-0.0848293	0.142031	-0.634543	-0.498277	0.0306903	0.422191	-0.332255	-0.385704	-0.552286	0.0722254	0.0509581	-0.546758	0.0496209	0.127622	-0.280219	-0.625043	-0.19363	-0.393982	0.161193	0.291651	-0.507758	-0.0942369	-0.158315	-0.0872385	0.0223304	0.00585217	1.06956	0.186699	0.195454	-0.751276	0.135771	-0.337413	0.430055	0.426911	-0.520174	0.0845773	-0.664409	0.0924649	-0.162271	0.483274	0.0321979	-0.327008	-0.335457	-0.381722	0.378984
-4.80241	-1.34577	1.60643	-0.069424	-0.309175	-0.0842979	0.144354	-0.635315	-0.495862	0.0306612	0.42231	-0.332103	-0.386487	-0.554212	0.0727856	0.0488939	-0.548523	0.0504191	0.126639	-0.279096	-0.623983	-0.194046	-0.394338	0.160576	0.292255	-0.507534	-0.0929346	-0.160259	-0.0856889	0.022622	0.00542549	1.07576	0.183128	0.196816	-0.750395	0.137153	-0.338714	0.429548	0.426015	-0.518158	0.085788	-0.663968	0.0920212	-0.162164	0.484154	0.0318803	-0.326768	-0.334655	-0.381114	0.379674
-4.80143	-1.34619	1.60952	-0.0684546	-0.309389	-0.083779	0.146705	-0.636074	-0.49345	0.0306427	0.422433	-0.331932	-0.387243	-0.556136	0.0733247	0.0468209	-0.55028	0.051206	0.125663	-0.27796	-0.622927	-0.194451	-0.394683	0.15994	0.292871	-0.507315	-0.0916357	-0.162205	-0.0841386	0.0229165	0.0049877	1.08193	0.17954	0.198163	-0.74952	0.13856	-0.340007	0.42903	0.425105	-0.516143	0.0869907	-0.663519	0.0915751	-0.162063	0.485022	0.0315451	-0.326526	-0.333827	-0.380489	0.380344
-4.80044	-1.34661	1.61262	-0.0674852	-0.309613	-0.0832726	0.149086	-0.636819	-0.491039	0.0306347	0.422559	-0.331742	-0.38797	-0.558057	0.0738425	0.0447394	-0.552028	0.0519815	0.124695	-0.276812	-0.621877	-0.194843	-0.395019	0.159286	0.293499	-0.5071	-0.0903405	-0.164152	-0.0825879	0.0232139	0.0045389	1.08807	0.175937	0.199494	-0.748652	0.139993	-0.341294	0.428502	0.424181	-0.514129	0.0881854	-0.663063	0.0911267	-0.161969	0.485877	0.0311927	-0.326282	-0.332973	-0.379848	0.380993
-4.79946	-1.34703	1.61572	-0.0665159	-0.309845	-0.0827788	0.151495	-0.63755	-0.488631	0.0306372	0.422687	-0.331533	-0.388668	-0.559975	0.074339	0.0426495	-0.553766	0.0527457	0.123734	-0.275651	-0.620832	-0.195224	-0.395344	0.158614	0.294138	-0.506889	-0.089049	-0.1661	-0.0810369	0.0235143	0.00407918	1.09419	0.172319	0.20081	-0.74779	0.14145	-0.342574	0.427962	0.423244	-0.512114	0.0893717	-0.662599	0.0906761	-0.161881	0.486719	0.0308229	-0.326037	-0.332093	-0.37919	0.381621
-4.79848	-1.34744	1.61883	-0.0655467	-0.310087	-0.0822975	0.153934	-0.638268	-0.486225	0.0306503	0.422818	-0.331305	-0.389338	-0.56189	0.0748141	0.0405516	-0.555496	0.0534984	0.122782	-0.274478	-0.619792	-0.195592	-0.39566	0.157925	0.294789	-0.506683	-0.0877614	-0.168048	-0.0794859	0.0238177	0.00360866	1.10028	0.168685	0.20211	-0.746935	0.142932	-0.343848	0.427413	0.422293	-0.510101	0.0905495	-0.662128	0.0902235	-0.161799	0.487548	0.0304361	-0.32579	-0.331186	-0.378516	0.382229
-4.79749	-1.34785	1.62194	-0.0645779	-0.310337	-0.0818286	0.156401	-0.638973	-0.483821	0.0306739	0.422951	-0.331057	-0.389978	-0.563803	0.0752676	0.0384459	-0.557216	0.0542397	0.121838	-0.273292	-0.618757	-0.195949	-0.395965	0.157217	0.295451	-0.506482	-0.0864778	-0.169997	-0.0779352	0.024124	0.00312742	1.10634	0.165037	0.203395	-0.746088	0.144438	-0.345114	0.426852	0.421328	-0.508089	0.0917185	-0.661649	0.0897689	-0.161724	0.488364	0.0300323	-0.325542	-0.330253	-0.377826	0.382815
-4.79651	-1.34826	1.62505	-0.0636095	-0.310596	-0.0813723	0.158898	-0.639665	-0.48142	0.0307081	0.423086	-0.33079	-0.390589	-0.565712	0.0756996	0.0363326	-0.558926	0.0549695	0.120901	-0.272094	-0.617727	-0.196294	-0.39626	0.156492	0.296125	-0.506285	-0.0851985	-0.171945	-0.0763849	0.0244333	0.00263559	1.11237	0.161375	0.204663	-0.745247	0.14597	-0.346374	0.426281	0.420351	-0.506077	0.0928785	-0.661164	0.0893124	-0.161655	0.489167	0.0296116	-0.325292	-0.329294	-0.377119	0.38338
-4.79553	-1.34866	1.62817	-0.0626416	-0.310864	-0.0809283	0.161424	-0.640345	-0.479022	0.0307528	0.423223	-0.330504	-0.391171	-0.567618	0.0761099	0.0342121	-0.560625	0.0556878	0.119973	-0.270884	-0.616703	-0.196628	-0.396545	0.15575	0.29681	-0.506093	-0.0839234	-0.173894	-0.0748355	0.0247457	0.00213325	1.11837	0.157699	0.205915	-0.744413	0.147527	-0.347626	0.425699	0.419361	-0.504067	0.0940293	-0.660671	0.0888542	-0.161593	0.489956	0.0291742	-0.325041	-0.328309	-0.376397	0.383924
-4.79454	-1.34907	1.63129	-0.0616743	-0.31114	-0.0804969	0.163979	-0.641012	-0.476627	0.0308081	0.423362	-0.330198	-0.391723	-0.56952	0.0764985	0.0320845	-0.562314	0.0563946	0.119054	-0.269662	-0.615684	-0.19695	-0.39682	0.154991	0.297506	-0.505905	-0.0826528	-0.175843	-0.073287	0.025061	0.00162053	1.12434	0.154009	0.207151	-0.743586	0.149108	-0.348871	0.425106	0.418358	-0.502058	0.0951706	-0.660171	0.0883944	-0.161538	0.490732	0.0287202	-0.324789	-0.327297	-0.375658	0.384446
-4.79356	-1.34946	1.63442	-0.0607078	-0.311425	-0.0800778	0.166564	-0.641667	-0.474236	0.0308739	0.423503	-0.329874	-0.392244	-0.571418	0.0768654	0.0299501	-0.563992	0.0570899	0.118143	-0.268428	-0.614671	-0.19726	-0.397085	0.154215	0.298213	-0.505722	-0.0813867	-0.177792	-0.0717397	0.0253794	0.00109752	1.13029	0.150306	0.20837	-0.742767	0.150714	-0.35011	0.424503	0.417343	-0.500051	0.0963023	-0.659664	0.087933	-0.16149	0.491493	0.0282497	-0.324536	-0.32626	-0.374904	0.384948
-4.79258	-1.34986	1.63755	-0.059742	-0.311719	-0.0796711	0.169178	-0.64231	-0.471848	0.0309502	0.423645	-0.329529	-0.392736	-0.573313	0.0772105	0.0278092	-0.565659	0.0577737	0.11724	-0.267182	-0.613663	-0.19756	-0.397339	0.153423	0.29893	-0.505544	-0.0801254	-0.17974	-0.0701939	0.0257007	0.000564328	1.1362	0.146591	0.209572	-0.741955	0.152345	-0.351341	0.423889	0.416316	-0.498045	0.0974242	-0.659151	0.0874702	-0.161448	0.492241	0.0277629	-0.324283	-0.325196	-0.374134	0.385427
-4.7916	-1.35025	1.64068	-0.0587772	-0.312021	-0.0792768	0.171821	-0.642941	-0.469463	0.0310372	0.423788	-0.329165	-0.393197	-0.575203	0.0775337	0.025662	-0.567314	0.0584459	0.116346	-0.265924	-0.61266	-0.197848	-0.397582	0.152614	0.299659	-0.505371	-0.078869	-0.181688	-0.0686499	0.0260252	2.10728e-05	1.14209	0.142863	0.210758	-0.74115	0.154001	-0.352564	0.423265	0.415277	-0.496041	0.098536	-0.658631	0.0870062	-0.161413	0.492974	0.0272599	-0.324028	-0.324107	-0.373348	0.385885
-4.79061	-1.35063	1.64381	-0.0578135	-0.312331	-0.0788948	0.174494	-0.643561	-0.467083	0.0311346	0.423932	-0.328782	-0.393628	-0.577088	0.0778349	0.0235088	-0.568958	0.0591065	0.115461	-0.264654	-0.611663	-0.198125	-0.397815	0.151789	0.300398	-0.505203	-0.0776175	-0.183635	-0.0671078	0.0263526	-0.000532141	1.14794	0.139124	0.211927	-0.740353	0.155682	-0.353781	0.42263	0.414227	-0.494038	0.0996376	-0.658105	0.0865409	-0.161385	0.493693	0.0267408	-0.323773	-0.322991	-0.372546	0.386321
-4.78963	-1.35102	1.64695	-0.0568509	-0.312649	-0.0785251	0.177196	-0.644169	-0.464707	0.0312426	0.424077	-0.328379	-0.394028	-0.57897	0.0781142	0.0213499	-0.570589	0.0597556	0.114584	-0.263372	-0.610672	-0.198392	-0.398038	0.150948	0.301147	-0.505039	-0.0763712	-0.185581	-0.0655679	0.0266831	-0.0010952	1.15377	0.135373	0.213078	-0.739563	0.157387	-0.354989	0.421985	0.413165	-0.492038	0.100729	-0.657572	0.0860745	-0.161363	0.494397	0.0262058	-0.323517	-0.321849	-0.371729	0.386735
-4.78865	-1.3514	1.65009	-0.0558895	-0.312976	-0.0781677	0.179927	-0.644766	-0.462335	0.031361	0.424223	-0.327957	-0.394397	-0.580846	0.0783715	0.0191855	-0.572208	0.0603931	0.113717	-0.262078	-0.609686	-0.198647	-0.39825	0.150091	0.301907	-0.504881	-0.0751301	-0.187526	-0.0640305	0.0270167	-0.001668	1.15956	0.131611	0.214213	-0.738781	0.159117	-0.356191	0.421329	0.412091	-0.49004	0.101809	-0.657033	0.0856072	-0.161349	0.495086	0.025655	-0.32326	-0.320682	-0.370897	0.387127
-4.78766	-1.35177	1.65323	-0.0549296	-0.313311	-0.0778224	0.182688	-0.645352	-0.459968	0.03149	0.424369	-0.327515	-0.394735	-0.582718	0.0786068	0.0170158	-0.573815	0.061019	0.112858	-0.260773	-0.608707	-0.198892	-0.398451	0.149218	0.302677	-0.504727	-0.0738944	-0.18947	-0.0624957	0.0273533	-0.00225042	1.16532	0.127838	0.215329	-0.738006	0.160872	-0.357385	0.420663	0.411007	-0.488044	0.102879	-0.656487	0.0851389	-0.161342	0.495761	0.0250886	-0.323004	-0.319489	-0.37005	0.387497
-4.78668	-1.35214	1.65638	-0.0539711	-0.313654	-0.0774893	0.185479	-0.645928	-0.457605	0.0316295	0.424515	-0.327054	-0.395042	-0.584584	0.0788199	0.0148412	-0.575408	0.0616333	0.112009	-0.259456	-0.607732	-0.199127	-0.398642	0.148331	0.303456	-0.504579	-0.0726642	-0.191413	-0.0609639	0.027693	-0.00284235	1.17106	0.124055	0.216429	-0.737239	0.162651	-0.358571	0.419986	0.409912	-0.48605	0.103937	-0.655936	0.0846699	-0.161342	0.496421	0.0245067	-0.322746	-0.31827	-0.369187	0.387845
-4.7857	-1.35251	1.65953	-0.0530142	-0.314005	-0.0771684	0.188298	-0.646492	-0.455247	0.0317794	0.424662	-0.326573	-0.395316	-0.586445	0.0790109	0.0126618	-0.576988	0.062236	0.111168	-0.258128	-0.606764	-0.199351	-0.398822	0.147428	0.304246	-0.504435	-0.0714397	-0.193354	-0.0594353	0.0280357	-0.00344368	1.17676	0.120263	0.21751	-0.73648	0.164455	-0.35975	0.419299	0.408806	-0.484059	0.104985	-0.655379	0.0842003	-0.161349	0.497065	0.0239094	-0.322489	-0.317025	-0.368309	0.38817
-4.78471	-1.35287	1.66268	-0.052059	-0.314364	-0.0768595	0.191148	-0.647047	-0.452895	0.0319397	0.424808	-0.326072	-0.39556	-0.588301	0.0791798	0.010478	-0.578555	0.0628272	0.110337	-0.256788	-0.605802	-0.199565	-0.398991	0.14651	0.305045	-0.504297	-0.0702209	-0.195293	-0.0579101	0.0283815	-0.00405429	1.18243	0.11646	0.218574	-0.735729	0.166284	-0.360921	0.418602	0.40769	-0.482071	0.106021	-0.654816	0.08373	-0.161364	0.497694	0.023297	-0.322231	-0.315755	-0.367416	0.388473
-4.78373	-1.35323	1.66583	-0.0511056	-0.314731	-0.0765626	0.194027	-0.647591	-0.450547	0.0321105	0.424955	-0.325552	-0.395771	-0.590151	0.0793265	0.00829001	-0.580107	0.0634067	0.109516	-0.255437	-0.604845	-0.199769	-0.39915	0.145578	0.305854	-0.504163	-0.069008	-0.197231	-0.0563886	0.0287304	-0.00467406	1.18807	0.112649	0.219619	-0.734986	0.168138	-0.362084	0.417894	0.406564	-0.480085	0.107045	-0.654247	0.0832594	-0.161386	0.498308	0.0226695	-0.321973	-0.314459	-0.366508	0.388754
-4.78275	-1.35358	1.66898	-0.0501541	-0.315105	-0.0762777	0.196935	-0.648126	-0.448206	0.0322916	0.4251	-0.325012	-0.39595	-0.591995	0.0794509	0.00609808	-0.581646	0.0639747	0.108703	-0.254075	-0.603894	-0.199963	-0.399298	0.144631	0.306672	-0.504035	-0.0678012	-0.199167	-0.054871	0.0290823	-0.00530289	1.19368	0.108829	0.220646	-0.734251	0.170015	-0.363239	0.417176	0.405428	-0.478102	0.108057	-0.653673	0.0827884	-0.161415	0.498906	0.0220271	-0.321716	-0.313137	-0.365586	0.389012
-4.78177	-1.35393	1.67214	-0.0492047	-0.315487	-0.0760046	0.199873	-0.64865	-0.44587	0.0324831	0.425246	-0.324453	-0.396097	-0.593833	0.0795532	0.00390247	-0.58317	0.0645311	0.107901	-0.252702	-0.602949	-0.200147	-0.399435	0.143671	0.3075	-0.503912	-0.0666006	-0.2011	-0.0533575	0.0294372	-0.00594064	1.19925	0.105001	0.221655	-0.733523	0.171918	-0.364386	0.416448	0.404282	-0.476122	0.109058	-0.653093	0.0823171	-0.161451	0.499488	0.0213699	-0.321458	-0.31179	-0.364649	0.389248
-4.78078	-1.35427	1.67529	-0.0482574	-0.315877	-0.0757435	0.20284	-0.649166	-0.443539	0.032685	0.42539	-0.323874	-0.396212	-0.595665	0.0796332	0.00170344	-0.584679	0.065076	0.107107	-0.251317	-0.602011	-0.200321	-0.399561	0.142696	0.308337	-0.503794	-0.0654062	-0.203032	-0.0518484	0.0297953	-0.00658721	1.2048	0.101166	0.222646	-0.732804	0.173845	-0.365526	0.415709	0.403127	-0.474145	0.110047	-0.652508	0.0818457	-0.161495	0.500054	0.0206982	-0.3212	-0.310418	-0.363697	0.389461
-4.7798	-1.35461	1.67845	-0.0473124	-0.316274	-0.075494	0.205836	-0.649672	-0.441215	0.0328971	0.425534	-0.323275	-0.396294	-0.597491	0.0796909	-0.00049874	-0.586174	0.0656093	0.106324	-0.249922	-0.601078	-0.200485	-0.399676	0.141707	0.309182	-0.503682	-0.0642182	-0.20496	-0.050344	0.0301564	-0.00724248	1.21031	0.0973226	0.223618	-0.732093	0.175796	-0.366657	0.414961	0.401963	-0.472172	0.111023	-0.651918	0.0813743	-0.161547	0.500604	0.020012	-0.320943	-0.30902	-0.362731	0.389651
-4.77882	-1.35495	1.68161	-0.0463698	-0.316678	-0.0752563	0.208862	-0.650169	-0.438897	0.0331195	0.425676	-0.322657	-0.396344	-0.59931	0.0797264	-0.00270381	-0.587653	0.0661311	0.10555	-0.248516	-0.600151	-0.20064	-0.39978	0.140706	0.310037	-0.503575	-0.0630367	-0.206886	-0.0488443	0.0305205	-0.00790632	1.21579	0.0934725	0.224571	-0.731391	0.177772	-0.367781	0.414202	0.400789	-0.470201	0.111986	-0.651323	0.080903	-0.161606	0.501137	0.0193116	-0.320686	-0.307597	-0.361751	0.389818
-4.77783	-1.35527	1.68477	-0.0454296	-0.31709	-0.0750303	0.211918	-0.650657	-0.436586	0.0333522	0.425818	-0.322019	-0.39636	-0.601122	0.0797396	-0.00491152	-0.589116	0.0666413	0.104787	-0.247099	-0.59923	-0.200786	-0.399874	0.13969	0.3109	-0.503472	-0.0618619	-0.20881	-0.0473498	0.0308877	-0.00857862	1.22124	0.0896159	0.225506	-0.730696	0.179773	-0.368896	0.413433	0.399607	-0.468235	0.112937	-0.650722	0.0804319	-0.161673	0.501655	0.018597	-0.320429	-0.306149	-0.360756	0.389962
-4.77685	-1.3556	1.68793	-0.0444921	-0.317508	-0.0748158	0.215003	-0.651136	-0.43428	0.033595	0.425957	-0.321362	-0.396344	-0.602927	0.0797305	-0.00712161	-0.590564	0.0671401	0.104033	-0.245671	-0.598316	-0.200923	-0.399956	0.138662	0.311771	-0.503376	-0.0606939	-0.21073	-0.0458606	0.0312579	-0.00925926	1.22665	0.0857531	0.226421	-0.73001	0.181797	-0.370003	0.412654	0.398417	-0.466272	0.113876	-0.650117	0.079961	-0.161747	0.502155	0.0178685	-0.320173	-0.304676	-0.359747	0.390083
-4.77587	-1.35591	1.6911	-0.0435573	-0.317934	-0.0746128	0.218117	-0.651607	-0.431982	0.0338481	0.426095	-0.320685	-0.396294	-0.604726	0.0796992	-0.00933381	-0.591996	0.0676274	0.103289	-0.244233	-0.597407	-0.20105	-0.400028	0.137622	0.312651	-0.503284	-0.0595327	-0.212647	-0.044377	0.0316312	-0.00994811	1.23204	0.0818847	0.227317	-0.729333	0.183846	-0.371102	0.411865	0.397218	-0.464313	0.114801	-0.649508	0.0794905	-0.161829	0.502639	0.0171262	-0.319917	-0.303178	-0.358725	0.390182
-4.77488	-1.35623	1.69426	-0.0426253	-0.318366	-0.0744212	0.22126	-0.65207	-0.429691	0.0341112	0.426232	-0.319989	-0.396211	-0.606517	0.0796456	-0.0115479	-0.593412	0.0681033	0.102555	-0.242784	-0.596505	-0.201168	-0.400088	0.136568	0.313539	-0.503198	-0.0583786	-0.214561	-0.0428991	0.0320075	-0.0106451	1.23738	0.0780109	0.228194	-0.728664	0.18592	-0.372193	0.411066	0.396011	-0.462357	0.115713	-0.648893	0.0790205	-0.161919	0.503106	0.0163703	-0.319662	-0.301656	-0.357688	0.390257
-4.7739	-1.35653	1.69742	-0.0416963	-0.318806	-0.074241	0.224433	-0.652525	-0.427406	0.0343844	0.426366	-0.319273	-0.396095	-0.6083	0.0795697	-0.0137635	-0.59481	0.0685677	0.101832	-0.241325	-0.595609	-0.201278	-0.400138	0.135503	0.314435	-0.503117	-0.0572316	-0.216472	-0.0414273	0.0323868	-0.01135	1.2427	0.0741323	0.229052	-0.728003	0.188017	-0.373275	0.410257	0.394797	-0.460406	0.116612	-0.648275	0.0785511	-0.162017	0.503556	0.0156009	-0.319408	-0.300108	-0.356638	0.390309
-4.77292	-1.35683	1.70058	-0.0407704	-0.319252	-0.074072	0.227634	-0.652972	-0.425129	0.0346677	0.426498	-0.318538	-0.395945	-0.610076	0.0794715	-0.0159805	-0.596192	0.0690207	0.101118	-0.239856	-0.594719	-0.201379	-0.400176	0.134425	0.315339	-0.503042	-0.0560918	-0.218379	-0.0399618	0.0327691	-0.0120627	1.24799	0.0702492	0.22989	-0.727351	0.190139	-0.374349	0.409439	0.393574	-0.458458	0.117497	-0.647652	0.0780824	-0.162123	0.503989	0.0148182	-0.319154	-0.298536	-0.355575	0.390337
-4.77193	-1.35713	1.70374	-0.0398476	-0.319704	-0.0739142	0.230865	-0.653412	-0.42286	0.0349609	0.426628	-0.317783	-0.395762	-0.611844	0.0793511	-0.0181986	-0.597557	0.0694624	0.100415	-0.238376	-0.593835	-0.201472	-0.400204	0.133336	0.316251	-0.502972	-0.0549594	-0.220282	-0.0385027	0.0331545	-0.0127832	1.25324	0.066362	0.230709	-0.726708	0.192285	-0.375414	0.40861	0.392345	-0.456515	0.118369	-0.647024	0.0776144	-0.162236	0.504405	0.0140225	-0.318901	-0.296939	-0.354497	0.390343
-4.77095	-1.35742	1.70691	-0.0389282	-0.320164	-0.0737675	0.234125	-0.653845	-0.420598	0.0352641	0.426755	-0.317009	-0.395545	-0.613605	0.0792084	-0.0204175	-0.598905	0.0698928	0.0997225	-0.236887	-0.592958	-0.201556	-0.40022	0.132235	0.31717	-0.502907	-0.0538344	-0.222181	-0.0370504	0.0335428	-0.0135113	1.25845	0.0624712	0.231508	-0.726073	0.194455	-0.376471	0.407771	0.391108	-0.454576	0.119227	-0.646393	0.0771474	-0.162358	0.504803	0.0132137	-0.318649	-0.295318	-0.353407	0.390324
-4.76997	-1.3577	1.71007	-0.0380121	-0.320629	-0.0736317	0.237414	-0.65427	-0.418343	0.0355772	0.42688	-0.316215	-0.395294	-0.615357	0.0790436	-0.022637	-0.600235	0.0703118	0.0990403	-0.235388	-0.592087	-0.201631	-0.400225	0.131123	0.318097	-0.502848	-0.052717	-0.224076	-0.035605	0.0339342	-0.0142469	1.26364	0.0585772	0.232287	-0.725447	0.196649	-0.377519	0.406923	0.389864	-0.452642	0.120071	-0.645758	0.0766813	-0.162487	0.505183	0.0123922	-0.318399	-0.293672	-0.352303	0.390283
-4.76899	-1.35797	1.71323	-0.0370996	-0.321101	-0.0735068	0.240732	-0.654688	-0.416097	0.0359001	0.427002	-0.315402	-0.395008	-0.6171	0.0788565	-0.0248568	-0.601547	0.0707196	0.0983687	-0.233878	-0.591222	-0.201699	-0.40022	0.13	0.319031	-0.502794	-0.0516073	-0.225967	-0.0341668	0.0343284	-0.0149898	1.26879	0.0546805	0.233046	-0.72483	0.198867	-0.378559	0.406065	0.388614	-0.450712	0.120901	-0.645119	0.0762163	-0.162625	0.505546	0.0115581	-0.318149	-0.292003	-0.351186	0.390218
-4.768	-1.35824	1.71639	-0.0361908	-0.321579	-0.0733928	0.244079	-0.6551	-0.413858	0.0362328	0.427121	-0.31457	-0.394689	-0.618836	0.0786473	-0.0270766	-0.60284	0.0711162	0.0977076	-0.232359	-0.590364	-0.201759	-0.400203	0.128867	0.319972	-0.502746	-0.0505054	-0.227854	-0.032736	0.0347257	-0.0157399	1.2739	0.0507813	0.233785	-0.724222	0.201109	-0.379589	0.405197	0.387357	-0.448786	0.121718	-0.644476	0.0757525	-0.162771	0.505891	0.0107115	-0.3179	-0.290309	-0.350056	0.39013
-4.76702	-1.35851	1.71955	-0.0352858	-0.322063	-0.0732894	0.247455	-0.655505	-0.411628	0.0365752	0.427237	-0.313718	-0.394335	-0.620562	0.078416	-0.0292962	-0.604116	0.0715016	0.0970572	-0.230831	-0.589512	-0.201811	-0.400175	0.127723	0.32092	-0.502703	-0.0494114	-0.229736	-0.0313128	0.0351259	-0.0164971	1.27898	0.0468802	0.234504	-0.723623	0.203375	-0.380612	0.40432	0.386094	-0.446866	0.122519	-0.64383	0.07529	-0.162925	0.506218	0.00985268	-0.317652	-0.288591	-0.348914	0.390018
-4.76604	-1.35876	1.72271	-0.0343846	-0.322553	-0.0731966	0.250859	-0.655905	-0.409406	0.0369273	0.42735	-0.312848	-0.393948	-0.62228	0.0781626	-0.0315154	-0.605373	0.0718759	0.0964176	-0.229293	-0.588666	-0.201855	-0.400137	0.126568	0.321874	-0.502666	-0.0483254	-0.231613	-0.0298975	0.0355291	-0.0172614	1.28403	0.0429775	0.235203	-0.723032	0.205665	-0.381625	0.403432	0.384825	-0.44495	0.123307	-0.64318	0.0748289	-0.163087	0.506527	0.00898178	-0.317406	-0.286849	-0.347759	0.389882
-4.76505	-1.35901	1.72586	-0.0334874	-0.323048	-0.0731144	0.254292	-0.656298	-0.407193	0.037289	0.427459	-0.311958	-0.393525	-0.623989	0.0778871	-0.0337339	-0.60661	0.072239	0.0957888	-0.227746	-0.587827	-0.201891	-0.400087	0.125404	0.322835	-0.502634	-0.0472475	-0.233485	-0.0284903	0.0359351	-0.0180324	1.28905	0.0390737	0.235881	-0.722451	0.207979	-0.382629	0.402536	0.38355	-0.44304	0.12408	-0.642527	0.0743692	-0.163258	0.506818	0.00809899	-0.317161	-0.285084	-0.346591	0.389723
-4.76407	-1.35925	1.72902	-0.0325944	-0.323549	-0.0730425	0.257754	-0.656685	-0.404988	0.0376603	0.427564	-0.311049	-0.393068	-0.625689	0.0775895	-0.0359514	-0.607829	0.0725912	0.0951708	-0.22619	-0.586994	-0.201921	-0.400026	0.12423	0.323803	-0.502608	-0.0461778	-0.235352	-0.0270913	0.0363441	-0.0188102	1.29403	0.0351692	0.236539	-0.721878	0.210316	-0.383625	0.401629	0.38227	-0.441134	0.124838	-0.641871	0.0739111	-0.163437	0.507091	0.00720447	-0.316917	-0.283295	-0.34541	0.38954
-4.76309	-1.35949	1.73217	-0.0317056	-0.324056	-0.0729808	0.261244	-0.657067	-0.402792	0.0380411	0.427666	-0.310121	-0.392577	-0.62738	0.0772701	-0.0381677	-0.609029	0.0729323	0.0945638	-0.224624	-0.586167	-0.201943	-0.399954	0.123046	0.324777	-0.502587	-0.0451165	-0.237214	-0.0257008	0.0367559	-0.0195945	1.29897	0.0312644	0.237176	-0.721315	0.212677	-0.384611	0.400714	0.380985	-0.439234	0.125581	-0.641211	0.0734547	-0.163624	0.507345	0.00629842	-0.316674	-0.281482	-0.344218	0.389333
-4.7621	-1.35972	1.73532	-0.0308212	-0.324568	-0.0729293	0.264763	-0.657443	-0.400605	0.0384313	0.427764	-0.309173	-0.392051	-0.629061	0.0769286	-0.0403826	-0.610209	0.0732625	0.0939677	-0.22305	-0.585347	-0.201957	-0.399871	0.121854	0.325757	-0.502571	-0.0440635	-0.239071	-0.0243191	0.0371707	-0.0203853	1.30388	0.0273597	0.237793	-0.72076	0.215062	-0.385589	0.399788	0.379694	-0.437338	0.12631	-0.640549	0.073	-0.16382	0.50758	0.005381	-0.316433	-0.279646	-0.343013	0.389103
-4.76112	-1.35994	1.73847	-0.0299413	-0.325086	-0.0728879	0.26831	-0.657814	-0.398428	0.0388308	0.427858	-0.308207	-0.39149	-0.630732	0.0765653	-0.0425957	-0.611369	0.0735818	0.0933827	-0.221466	-0.584533	-0.201965	-0.399777	0.120652	0.326743	-0.502562	-0.0430191	-0.240922	-0.0229463	0.0375882	-0.0211824	1.30876	0.0234556	0.238389	-0.720215	0.21747	-0.386558	0.398854	0.378399	-0.435449	0.127023	-0.639884	0.0725472	-0.164024	0.507797	0.00445242	-0.316194	-0.277787	-0.341796	0.388849
-4.76014	-1.36015	1.74161	-0.029066	-0.325608	-0.0728564	0.271885	-0.658181	-0.396259	0.0392397	0.427947	-0.307223	-0.390894	-0.632394	0.0761802	-0.0448069	-0.612509	0.0738903	0.0928089	-0.219874	-0.583726	-0.201966	-0.399672	0.119442	0.327734	-0.502557	-0.0419833	-0.242768	-0.0215827	0.0380086	-0.0219858	1.3136	0.0195524	0.238964	-0.719679	0.219902	-0.387517	0.39791	0.377099	-0.433564	0.127722	-0.639216	0.0720963	-0.164236	0.507995	0.00351285	-0.315956	-0.275905	-0.340567	0.388571
-4.75916	-1.36036	1.74475	-0.0281954	-0.326136	-0.0728347	0.275488	-0.658542	-0.3941	0.0396578	0.428032	-0.306219	-0.390263	-0.634046	0.0757732	-0.0470158	-0.613628	0.0741881	0.0922462	-0.218274	-0.582925	-0.201961	-0.399556	0.118223	0.328731	-0.502558	-0.0409562	-0.244607	-0.0202285	0.0384319	-0.0227952	1.31841	0.0156506	0.239518	-0.719152	0.222357	-0.388467	0.396957	0.375794	-0.431686	0.128405	-0.638546	0.0716474	-0.164458	0.508175	0.00256247	-0.315719	-0.274	-0.339327	0.388269
-4.75817	-1.36055	1.74789	-0.0273297	-0.326668	-0.0728227	0.279119	-0.6589	-0.39195	0.040085	0.428113	-0.305196	-0.389598	-0.635688	0.0753446	-0.0492223	-0.614727	0.0744751	0.0916948	-0.216665	-0.58213	-0.201949	-0.399429	0.116996	0.329734	-0.502565	-0.0399379	-0.246441	-0.0188838	0.0388579	-0.0236105	1.32318	0.0117506	0.240051	-0.718635	0.224836	-0.389408	0.395994	0.374486	-0.429813	0.129073	-0.637874	0.0712006	-0.164687	0.508335	0.00160148	-0.315485	-0.272072	-0.338075	0.387943
-4.75719	-1.36074	1.75103	-0.0264689	-0.327205	-0.0728202	0.282778	-0.659252	-0.38981	0.0405213	0.428189	-0.304155	-0.388897	-0.637319	0.0748943	-0.0514261	-0.615806	0.0747514	0.0911547	-0.215048	-0.581342	-0.20193	-0.399291	0.115762	0.330742	-0.502577	-0.0389286	-0.248269	-0.017549	0.0392866	-0.0244317	1.32791	0.00785273	0.240563	-0.718127	0.227337	-0.39034	0.395022	0.373173	-0.427946	0.129725	-0.637199	0.0707561	-0.164926	0.508476	0.000630064	-0.315252	-0.270121	-0.336811	0.387594
-4.75621	-1.36093	1.75416	-0.0256133	-0.327747	-0.0728272	0.286464	-0.659601	-0.387679	0.0409666	0.42826	-0.303096	-0.388161	-0.63894	0.0744225	-0.053627	-0.616863	0.0750172	0.0906259	-0.213423	-0.580561	-0.201905	-0.399142	0.11452	0.331755	-0.502595	-0.0379282	-0.25009	-0.0162241	0.0397182	-0.0252585	1.33262	0.00395752	0.241054	-0.717628	0.229863	-0.391262	0.394041	0.371857	-0.426084	0.130362	-0.636522	0.0703138	-0.165173	0.508598	-0.000351591	-0.31502	-0.268148	-0.335536	0.38722
-4.75522	-1.3611	1.75729	-0.0247628	-0.328293	-0.0728435	0.290178	-0.659946	-0.385559	0.0414209	0.428326	-0.302017	-0.38739	-0.640551	0.0739291	-0.0558247	-0.6179	0.0752725	0.0901085	-0.21179	-0.579786	-0.201874	-0.398982	0.11327	0.332773	-0.502618	-0.0369368	-0.251905	-0.0149094	0.0401524	-0.0260909	1.33728	6.5338e-05	0.241524	-0.717138	0.232411	-0.392175	0.393051	0.370538	-0.424229	0.130983	-0.635843	0.0698739	-0.165428	0.5087	-0.00134329	-0.314791	-0.266153	-0.33425	0.386823
-4.75424	-1.36127	1.76041	-0.0239177	-0.328844	-0.0728689	0.29392	-0.660287	-0.383448	0.041884	0.428387	-0.300921	-0.386584	-0.642151	0.0734143	-0.0580189	-0.618915	0.0755173	0.0896026	-0.210149	-0.579017	-0.201837	-0.398811	0.112013	0.333795	-0.502647	-0.0359547	-0.253713	-0.0136052	0.0405894	-0.0269287	1.34191	-0.00382341	0.241972	-0.716658	0.234982	-0.393078	0.392052	0.369215	-0.422379	0.131589	-0.635162	0.0694365	-0.165693	0.508783	-0.00234485	-0.314563	-0.264135	-0.332953	0.386402
-4.75326	-1.36142	1.76353	-0.023078	-0.329399	-0.0729034	0.297689	-0.660625	-0.381348	0.0423559	0.428443	-0.299806	-0.385742	-0.64374	0.0728781	-0.0602095	-0.619908	0.0757518	0.0891082	-0.2085	-0.578255	-0.201794	-0.398629	0.11075	0.334822	-0.502682	-0.0349818	-0.255514	-0.0123116	0.041029	-0.0277718	1.34651	-0.0077083	0.242399	-0.716187	0.237577	-0.393972	0.391044	0.367889	-0.420536	0.132179	-0.634479	0.0690016	-0.165966	0.508847	-0.00335607	-0.314338	-0.262096	-0.331645	0.385956
-4.75227	-1.36157	1.76665	-0.0222439	-0.329957	-0.0729467	0.301486	-0.66096	-0.379258	0.0428365	0.428493	-0.298673	-0.384866	-0.645319	0.0723206	-0.0623961	-0.62088	0.0759759	0.0886254	-0.206844	-0.577499	-0.201746	-0.398436	0.10948	0.335854	-0.502721	-0.0340182	-0.257309	-0.0110288	0.0414713	-0.02862	1.35107	-0.0115889	0.242805	-0.715726	0.240194	-0.394857	0.390027	0.36656	-0.418699	0.132753	-0.633794	0.0685694	-0.166248	0.508891	-0.00437676	-0.314114	-0.260035	-0.330326	0.385487
-4.75129	-1.36171	1.76976	-0.0214154	-0.33052	-0.0729988	0.305309	-0.661292	-0.377178	0.0433258	0.428538	-0.297521	-0.383954	-0.646886	0.0717419	-0.0645786	-0.62183	0.0761898	0.0881542	-0.20518	-0.57675	-0.201692	-0.398233	0.108204	0.33689	-0.502767	-0.0330641	-0.259096	-0.00975696	0.0419163	-0.0294733	1.35559	-0.0154649	0.243189	-0.715274	0.242834	-0.395732	0.389	0.365229	-0.416869	0.133311	-0.633109	0.0681399	-0.166538	0.508915	-0.00540673	-0.313892	-0.257952	-0.328997	0.384994
-4.75031	-1.36184	1.77286	-0.0205928	-0.331087	-0.0730595	0.309159	-0.66162	-0.375109	0.0438235	0.428577	-0.296352	-0.383006	-0.648442	0.0711421	-0.0667567	-0.622757	0.0763936	0.0876946	-0.203509	-0.576007	-0.201633	-0.398019	0.106922	0.337929	-0.502818	-0.0321195	-0.260876	-0.00849638	0.0423638	-0.0303314	1.36008	-0.0193358	0.243551	-0.714831	0.245497	-0.396597	0.387965	0.363896	-0.415044	0.133852	-0.632421	0.0677132	-0.166838	0.50892	-0.00644577	-0.313672	-0.255847	-0.327657	0.384477
-4.74932	-1.36197	1.77596	-0.0197761	-0.331657	-0.0731287	0.313036	-0.661947	-0.37305	0.0443298	0.42861	-0.295164	-0.382024	-0.649986	0.0705213	-0.0689302	-0.623662	0.0765873	0.0872468	-0.201831	-0.575271	-0.201569	-0.397794	0.105634	0.338973	-0.502874	-0.0311844	-0.262649	-0.00724721	0.0428139	-0.0311943	1.36453	-0.0232012	0.243892	-0.714398	0.248183	-0.397452	0.386922	0.36256	-0.413227	0.134378	-0.631733	0.0672894	-0.167146	0.508904	-0.0074937	-0.313454	-0.253721	-0.326307	0.383936
-4.74834	-1.36208	1.77906	-0.0189655	-0.33223	-0.0732061	0.31694	-0.662271	-0.371002	0.0448444	0.428637	-0.293959	-0.381005	-0.651519	0.0698795	-0.0710988	-0.624545	0.076771	0.0868107	-0.200146	-0.574541	-0.201499	-0.397558	0.10434	0.340021	-0.502936	-0.030259	-0.264415	-0.00600965	0.0432665	-0.0320618	1.36895	-0.0270607	0.244211	-0.713975	0.250891	-0.398298	0.385869	0.361223	-0.411415	0.134888	-0.631043	0.0668686	-0.167464	0.508869	-0.00855031	-0.313238	-0.251575	-0.324947	0.383372
-4.74736	-1.36218	1.78215	-0.018161	-0.332807	-0.0732918	0.32087	-0.662592	-0.368965	0.0453672	0.428658	-0.292736	-0.379952	-0.65304	0.0692169	-0.0732624	-0.625405	0.0769448	0.0863864	-0.198454	-0.573817	-0.201425	-0.397311	0.103042	0.341072	-0.503003	-0.0293434	-0.266173	-0.00478388	0.0437216	-0.0329338	1.37333	-0.030914	0.244508	-0.713561	0.253622	-0.399134	0.384808	0.359884	-0.409611	0.135382	-0.630353	0.0664507	-0.16779	0.508814	-0.00961541	-0.313024	-0.249407	-0.323576	0.382783
-4.74638	-1.36228	1.78523	-0.0173628	-0.333388	-0.0733854	0.324826	-0.662912	-0.366939	0.0458983	0.428673	-0.291495	-0.378863	-0.65455	0.0685335	-0.0754206	-0.626241	0.0771088	0.085974	-0.196756	-0.5731	-0.201345	-0.397054	0.101738	0.342126	-0.503076	-0.0284375	-0.267923	-0.00357009	0.0441793	-0.0338102	1.37768	-0.0347605	0.244784	-0.713157	0.256375	-0.39996	0.383738	0.358543	-0.407813	0.135859	-0.629661	0.0660361	-0.168126	0.508738	-0.0106888	-0.312813	-0.247218	-0.322196	0.38217
-4.74539	-1.36237	1.78831	-0.0165711	-0.333971	-0.0734869	0.328809	-0.66323	-0.364923	0.0464375	0.428682	-0.290237	-0.377739	-0.656048	0.0678295	-0.0775733	-0.627055	0.077263	0.0855735	-0.195051	-0.57239	-0.201262	-0.396786	0.10043	0.343184	-0.503154	-0.0275416	-0.269665	-0.00236847	0.0446394	-0.0346908	1.38199	-0.0385999	0.245037	-0.712762	0.25915	-0.400776	0.382659	0.357202	-0.406022	0.13632	-0.628969	0.0656246	-0.16847	0.508643	-0.0117703	-0.312603	-0.245009	-0.320806	0.381533
-4.74441	-1.36244	1.79138	-0.0157859	-0.334557	-0.0735961	0.332817	-0.663546	-0.362919	0.0469846	0.428684	-0.288961	-0.376579	-0.657533	0.067105	-0.0797202	-0.627846	0.0774076	0.0851849	-0.19334	-0.571685	-0.201173	-0.396508	0.0991175	0.344244	-0.503237	-0.0266556	-0.271399	-0.00117922	0.0451019	-0.0355755	1.38626	-0.0424318	0.245269	-0.712377	0.261948	-0.401582	0.381572	0.355859	-0.404238	0.136764	-0.628276	0.0652164	-0.168823	0.508527	-0.0128596	-0.312396	-0.242779	-0.319407	0.380873
-4.74343	-1.36251	1.79444	-0.0150073	-0.335146	-0.0737129	0.336851	-0.663862	-0.360927	0.0475397	0.428679	-0.287668	-0.375384	-0.659007	0.06636	-0.0818611	-0.628612	0.0775427	0.0848083	-0.191623	-0.570988	-0.201081	-0.396219	0.0978009	0.345308	-0.503327	-0.0257796	-0.273125	-2.50232e-06	0.0455668	-0.0364641	1.3905	-0.0462559	0.245478	-0.712001	0.264768	-0.402378	0.380476	0.354515	-0.402461	0.137192	-0.627583	0.0648115	-0.169186	0.50839	-0.0139567	-0.312191	-0.240529	-0.317998	0.380189
-4.74244	-1.36257	1.7975	-0.0142355	-0.335737	-0.073837	0.340911	-0.664176	-0.358945	0.0481027	0.428668	-0.286357	-0.374153	-0.660468	0.0655947	-0.0839958	-0.629356	0.0776682	0.0844437	-0.1899	-0.570296	-0.200984	-0.395919	0.0964805	0.346374	-0.503421	-0.0249138	-0.274842	0.00116149	0.046034	-0.0373565	1.3947	-0.0500716	0.245666	-0.711636	0.26761	-0.403165	0.379372	0.353171	-0.400691	0.137603	-0.626889	0.0644101	-0.169557	0.508234	-0.0150612	-0.311988	-0.238259	-0.316579	0.37948
-4.74146	-1.36261	1.80054	-0.0134706	-0.336331	-0.0739683	0.344996	-0.664489	-0.356975	0.0486733	0.42865	-0.28503	-0.372887	-0.661916	0.0648091	-0.086124	-0.630075	0.0777844	0.0840911	-0.188171	-0.569611	-0.200883	-0.395609	0.0951565	0.347443	-0.503521	-0.024058	-0.276551	0.00231258	0.0465036	-0.0382527	1.39887	-0.0538786	0.245831	-0.711279	0.270474	-0.403941	0.378259	0.351827	-0.398928	0.137998	-0.626195	0.0640121	-0.169938	0.508056	-0.016173	-0.311787	-0.235969	-0.315152	0.378748
-4.74048	-1.36265	1.80359	-0.0127127	-0.336927	-0.0741067	0.349107	-0.664801	-0.355017	0.0492516	0.428624	-0.283686	-0.371585	-0.663352	0.0640035	-0.0882456	-0.630771	0.0778914	0.0837506	-0.186436	-0.568932	-0.200778	-0.395289	0.0938293	0.348514	-0.503626	-0.0232126	-0.278251	0.00345059	0.0469754	-0.0391524	1.403	-0.0576766	0.245975	-0.710933	0.27336	-0.404707	0.377138	0.350482	-0.397172	0.138377	-0.625501	0.0636178	-0.170328	0.507859	-0.0172919	-0.311589	-0.23366	-0.313716	0.377992
-4.73949	-1.36268	1.80662	-0.0119619	-0.337525	-0.0742519	0.353242	-0.665113	-0.35307	0.0498375	0.428592	-0.282324	-0.370248	-0.664776	0.0631779	-0.0903602	-0.631442	0.0779891	0.0834223	-0.184696	-0.56826	-0.20067	-0.394958	0.092499	0.349587	-0.503736	-0.0223774	-0.279943	0.00457535	0.0474496	-0.0400555	1.40709	-0.061465	0.246096	-0.710596	0.276268	-0.405462	0.376009	0.349138	-0.395424	0.138739	-0.624807	0.063227	-0.170727	0.50764	-0.0184177	-0.311393	-0.231331	-0.312271	0.377213
-4.73851	-1.36269	1.80964	-0.0112184	-0.338125	-0.0744039	0.357403	-0.665424	-0.351135	0.0504307	0.428552	-0.280946	-0.368876	-0.666186	0.0623325	-0.0924678	-0.632089	0.0780778	0.0831061	-0.182951	-0.567594	-0.200558	-0.394617	0.091166	0.350663	-0.503852	-0.0215525	-0.281626	0.00568668	0.0479259	-0.0409619	1.41115	-0.0652436	0.246195	-0.710269	0.279197	-0.406208	0.374871	0.347794	-0.393682	0.139084	-0.624113	0.06284	-0.171135	0.507401	-0.0195501	-0.311199	-0.228983	-0.310817	0.376409
-4.73753	-1.3627	1.81266	-0.0104823	-0.338728	-0.0745624	0.361587	-0.665735	-0.349211	0.0510314	0.428505	-0.279552	-0.367469	-0.667584	0.0614673	-0.0945681	-0.632711	0.0781575	0.0828021	-0.1812	-0.566934	-0.200442	-0.394265	0.0898306	0.35174	-0.503973	-0.0207381	-0.283299	0.00678442	0.0484044	-0.0418715	1.41517	-0.0690119	0.246272	-0.709952	0.282148	-0.406943	0.373726	0.34645	-0.391949	0.139412	-0.62342	0.0624568	-0.171552	0.507142	-0.020689	-0.311007	-0.226616	-0.309355	0.375582
-4.73655	-1.3627	1.81567	-0.00975361	-0.339331	-0.0747273	0.365797	-0.666047	-0.3473	0.0516392	0.428451	-0.278141	-0.366026	-0.668969	0.0605825	-0.0966608	-0.633309	0.0782283	0.0825103	-0.179445	-0.56628	-0.200324	-0.393904	0.0884929	0.352819	-0.5041	-0.0199341	-0.284964	0.00786839	0.048885	-0.042784	1.41915	-0.0727696	0.246326	-0.709644	0.285121	-0.407668	0.372572	0.345108	-0.390222	0.139724	-0.622727	0.0620774	-0.171978	0.506861	-0.0218341	-0.310818	-0.22423	-0.307885	0.374731
-4.73556	-1.36268	1.81867	-0.00903257	-0.339937	-0.0748983	0.37003	-0.666358	-0.3454	0.0522542	0.428389	-0.276713	-0.364548	-0.67034	0.0596783	-0.0987458	-0.633882	0.0782904	0.0822308	-0.177685	-0.565633	-0.200202	-0.393532	0.0871533	0.353899	-0.504231	-0.0191406	-0.286619	0.00893842	0.0493678	-0.0436995	1.4231	-0.0765162	0.246359	-0.709346	0.288115	-0.408382	0.37141	0.343766	-0.388504	0.140019	-0.622034	0.0617019	-0.172414	0.50656	-0.0229853	-0.310631	-0.221826	-0.306407	0.373857
-4.73458	-1.36266	1.82166	-0.00831925	-0.340543	-0.0750754	0.374288	-0.66667	-0.343513	0.0528763	0.428319	-0.27527	-0.363034	-0.671698	0.0587547	-0.100823	-0.634431	0.0783438	0.0819636	-0.17592	-0.564992	-0.200077	-0.39315	0.0858121	0.354981	-0.504368	-0.0183578	-0.288265	0.00999437	0.0498526	-0.0446177	1.42701	-0.0802514	0.246369	-0.709058	0.29113	-0.409086	0.37024	0.342425	-0.386792	0.140297	-0.621342	0.0613304	-0.172859	0.506238	-0.0241423	-0.310447	-0.219403	-0.30492	0.372959
-4.7336	-1.36262	1.82464	-0.00761378	-0.341151	-0.0752583	0.378569	-0.666983	-0.341637	0.0535052	0.428241	-0.27381	-0.361486	-0.673043	0.0578119	-0.102892	-0.634954	0.0783886	0.0817086	-0.174151	-0.564357	-0.199949	-0.392758	0.0844695	0.356064	-0.50451	-0.0175855	-0.289901	0.0110361	0.0503394	-0.0455385	1.43089	-0.0839748	0.246357	-0.70878	0.294166	-0.40978	0.369062	0.341086	-0.385089	0.140558	-0.620651	0.0609629	-0.173313	0.505895	-0.025305	-0.310265	-0.216962	-0.303426	0.372037
-4.73261	-1.36257	1.82761	-0.00691626	-0.34176	-0.0754468	0.382874	-0.667296	-0.339774	0.054141	0.428156	-0.272335	-0.359902	-0.674374	0.0568501	-0.104952	-0.635452	0.078425	0.081466	-0.172377	-0.563728	-0.199819	-0.392356	0.0831258	0.357149	-0.504658	-0.0168239	-0.291528	0.0120633	0.0508283	-0.0464618	1.43473	-0.087686	0.246322	-0.708511	0.297223	-0.410463	0.367876	0.339748	-0.383393	0.140803	-0.61996	0.0605996	-0.173777	0.50553	-0.026473	-0.310085	-0.214503	-0.301924	0.371092
-4.73163	-1.36252	1.83057	-0.00622683	-0.34237	-0.0756408	0.387202	-0.667611	-0.337923	0.0547836	0.428062	-0.270844	-0.358284	-0.675692	0.0558693	-0.107004	-0.635924	0.0784531	0.0812358	-0.1706	-0.563105	-0.199686	-0.391944	0.0817812	0.358234	-0.50481	-0.0160731	-0.293144	0.013076	0.051319	-0.0473875	1.43853	-0.0913847	0.246265	-0.708252	0.300301	-0.411136	0.366682	0.338412	-0.381705	0.141031	-0.619271	0.0602404	-0.174249	0.505145	-0.0276463	-0.309907	-0.212026	-0.300414	0.370124
-4.73065	-1.36245	1.83352	-0.0055456	-0.34298	-0.0758401	0.391553	-0.667926	-0.336085	0.0554327	0.42796	-0.269337	-0.35663	-0.676996	0.0548698	-0.109047	-0.636371	0.078473	0.0810179	-0.168819	-0.562489	-0.19955	-0.391523	0.080436	0.359319	-0.504968	-0.015333	-0.294751	0.014074	0.0518117	-0.0483154	1.4423	-0.0950704	0.246186	-0.708002	0.3034	-0.411798	0.365481	0.337078	-0.380025	0.141242	-0.618583	0.0598854	-0.174731	0.504739	-0.0288246	-0.309732	-0.209532	-0.298898	0.369131
-4.72966	-1.36237	1.83646	-0.00487267	-0.343591	-0.0760445	0.395928	-0.668243	-0.334259	0.0560883	0.42785	-0.267814	-0.354941	-0.678286	0.0538517	-0.111081	-0.636793	0.0784847	0.0808125	-0.167034	-0.561878	-0.199413	-0.391091	0.0790906	0.360406	-0.505131	-0.0146038	-0.296348	0.0150571	0.0523062	-0.0492453	1.44603	-0.0987428	0.246084	-0.707763	0.30652	-0.412449	0.364271	0.335746	-0.378352	0.141436	-0.617896	0.0595347	-0.175222	0.504312	-0.0300077	-0.309559	-0.207021	-0.297374	0.368116
-4.72868	-1.36227	1.83939	-0.00420818	-0.344202	-0.0762537	0.400324	-0.668562	-0.332445	0.0567504	0.427732	-0.266277	-0.353218	-0.679563	0.052815	-0.113107	-0.637189	0.0784885	0.0806195	-0.165246	-0.561274	-0.199273	-0.39065	0.0777451	0.361493	-0.505298	-0.0138854	-0.297935	0.0160252	0.0528026	-0.0501772	1.44972	-0.102402	0.24596	-0.707533	0.30966	-0.41309	0.363054	0.334417	-0.376688	0.141614	-0.617211	0.0591883	-0.175723	0.503864	-0.0311953	-0.309389	-0.204492	-0.295843	0.367077
-4.7277	-1.36217	1.84231	-0.00355224	-0.344814	-0.0764677	0.404744	-0.668882	-0.330644	0.0574187	0.427605	-0.264724	-0.35146	-0.680825	0.0517601	-0.115122	-0.637558	0.0784844	0.0804389	-0.163454	-0.560675	-0.199131	-0.390199	0.0763998	0.36258	-0.505471	-0.0131779	-0.299511	0.0169781	0.0533007	-0.0511109	1.45338	-0.106046	0.245814	-0.707313	0.312821	-0.413719	0.36183	0.33309	-0.375031	0.141774	-0.616527	0.0588463	-0.176233	0.503394	-0.0323873	-0.309221	-0.201947	-0.294305	0.366015
-4.72671	-1.36205	1.84522	-0.00290496	-0.345426	-0.0766862	0.409185	-0.669205	-0.328855	0.0580932	0.427469	-0.263156	-0.349667	-0.682073	0.050687	-0.117128	-0.637902	0.0784725	0.0802708	-0.161659	-0.560083	-0.198988	-0.389739	0.0750551	0.363667	-0.505649	-0.0124813	-0.301077	0.0179156	0.0538005	-0.0520463	1.457	-0.109676	0.245645	-0.707103	0.316001	-0.414339	0.360598	0.331766	-0.373383	0.141918	-0.615844	0.0585088	-0.176752	0.502904	-0.0335835	-0.309055	-0.199385	-0.29276	0.36493
-4.72573	-1.36193	1.84811	-0.00226645	-0.346038	-0.076909	0.413648	-0.669529	-0.32708	0.0587738	0.427325	-0.261574	-0.347839	-0.683307	0.0495959	-0.119125	-0.63822	0.078453	0.0801152	-0.159862	-0.559496	-0.198843	-0.389269	0.0737111	0.364754	-0.505832	-0.0117957	-0.302632	0.0188378	0.054302	-0.0529833	1.46058	-0.113292	0.245453	-0.706902	0.319203	-0.414947	0.359358	0.330446	-0.371742	0.142046	-0.615164	0.0581758	-0.17728	0.502392	-0.0347836	-0.308892	-0.196807	-0.29121	0.363822
-4.72475	-1.36179	1.85099	-0.00163684	-0.346649	-0.0771359	0.418133	-0.669856	-0.325316	0.0594603	0.427172	-0.259977	-0.345977	-0.684527	0.0484869	-0.121111	-0.638512	0.0784261	0.079972	-0.158061	-0.558916	-0.198696	-0.38879	0.0723681	0.36584	-0.506019	-0.0111212	-0.304177	0.0197443	0.0548052	-0.0539217	1.46413	-0.116892	0.24524	-0.706711	0.322424	-0.415544	0.358111	0.329128	-0.37011	0.142156	-0.614485	0.0578474	-0.177818	0.501859	-0.0359874	-0.308731	-0.194213	-0.289652	0.362691
-4.72377	-1.36164	1.85386	-0.00101623	-0.34726	-0.0773667	0.422639	-0.670185	-0.323566	0.0601527	0.42701	-0.258365	-0.34408	-0.685732	0.0473603	-0.123088	-0.638777	0.0783917	0.0798414	-0.156259	-0.558341	-0.198548	-0.388301	0.0710265	0.366927	-0.506212	-0.0104577	-0.305711	0.0206351	0.0553099	-0.0548613	1.46764	-0.120477	0.245004	-0.70653	0.325665	-0.416131	0.356856	0.327814	-0.368486	0.14225	-0.613809	0.0575235	-0.178365	0.501305	-0.0371948	-0.308573	-0.191603	-0.288089	0.361536
-4.72278	-1.36148	1.85672	-0.000404747	-0.34787	-0.0776013	0.427166	-0.670517	-0.321828	0.0608508	0.426839	-0.256739	-0.342149	-0.686923	0.0462162	-0.125054	-0.639016	0.0783501	0.0797234	-0.154453	-0.557772	-0.198398	-0.387803	0.0696864	0.368013	-0.506409	-0.00980524	-0.307234	0.02151	0.0558162	-0.0558021	1.47111	-0.124046	0.244745	-0.706358	0.328926	-0.416706	0.355594	0.326503	-0.36687	0.142327	-0.613134	0.0572043	-0.178921	0.50073	-0.0384055	-0.308416	-0.188977	-0.286519	0.360359
-4.7218	-1.3613	1.85957	0.000197504	-0.34848	-0.0778394	0.431714	-0.670852	-0.320104	0.0615545	0.42666	-0.255099	-0.340183	-0.688099	0.0450547	-0.127009	-0.639229	0.0783013	0.0796178	-0.152646	-0.557209	-0.198248	-0.387296	0.0683481	0.369098	-0.506612	-0.00916392	-0.308747	0.0223689	0.056324	-0.0567439	1.47455	-0.127599	0.244465	-0.706197	0.332207	-0.417271	0.354325	0.325196	-0.365263	0.142387	-0.612462	0.0568898	-0.179486	0.500133	-0.0396192	-0.308262	-0.186336	-0.284944	0.359159
-4.72082	-1.36111	1.8624	0.000790408	-0.349089	-0.0780808	0.436283	-0.67119	-0.318392	0.0622637	0.426471	-0.253444	-0.338184	-0.689261	0.043876	-0.128954	-0.639415	0.0782456	0.0795248	-0.150837	-0.556652	-0.198096	-0.386779	0.0670119	0.370182	-0.506819	-0.00853374	-0.310248	0.0232117	0.0568332	-0.0576866	1.47795	-0.131135	0.244162	-0.706044	0.335507	-0.417825	0.353048	0.323893	-0.363663	0.142431	-0.611792	0.0565801	-0.180061	0.499515	-0.0408359	-0.308111	-0.18368	-0.283363	0.357936
-4.71983	-1.36091	1.86522	0.00137385	-0.349697	-0.0783253	0.440872	-0.671531	-0.316693	0.0629783	0.426272	-0.251776	-0.33615	-0.690407	0.0426804	-0.130888	-0.639574	0.0781829	0.0794444	-0.149026	-0.5561	-0.197944	-0.386254	0.0656781	0.371266	-0.507031	-0.00791472	-0.311738	0.0240382	0.0573438	-0.0586301	1.48132	-0.134654	0.243836	-0.705902	0.338826	-0.418367	0.351765	0.322595	-0.362072	0.142458	-0.611124	0.0562752	-0.180645	0.498876	-0.0420552	-0.307961	-0.181009	-0.281777	0.356691
-4.71885	-1.3607	1.86802	0.00194772	-0.350304	-0.0785728	0.445481	-0.671875	-0.315008	0.0636982	0.426065	-0.250095	-0.334083	-0.69154	0.0414679	-0.132812	-0.639707	0.0781136	0.0793765	-0.147214	-0.555554	-0.197791	-0.38572	0.0643469	0.372348	-0.507247	-0.00730689	-0.313217	0.0248484	0.0578557	-0.0595741	1.48465	-0.138156	0.243489	-0.705769	0.342165	-0.418899	0.350474	0.3213	-0.36049	0.142468	-0.610459	0.0559751	-0.181239	0.498216	-0.0432769	-0.307814	-0.178323	-0.280185	0.355422
-4.71787	-1.36048	1.87081	0.00251191	-0.350909	-0.0788229	0.45011	-0.672223	-0.313335	0.0644232	0.425848	-0.2484	-0.331981	-0.692657	0.0402388	-0.134724	-0.639812	0.0780376	0.0793213	-0.1454	-0.555014	-0.197637	-0.385177	0.0630186	0.373429	-0.507469	-0.00671028	-0.314684	0.025642	0.058369	-0.0605187	1.48794	-0.14164	0.243119	-0.705646	0.345523	-0.419419	0.349176	0.320011	-0.358915	0.142462	-0.609797	0.0556799	-0.181841	0.497534	-0.0445009	-0.30767	-0.175623	-0.278588	0.354132
-4.71688	-1.36024	1.87359	0.00306631	-0.351512	-0.0790755	0.454758	-0.672574	-0.311675	0.0651532	0.425621	-0.246691	-0.329846	-0.693759	0.0389932	-0.136624	-0.639891	0.0779551	0.0792786	-0.143585	-0.554479	-0.197483	-0.384625	0.0616934	0.374508	-0.507695	-0.0061249	-0.31614	0.0264191	0.0588835	-0.0614636	1.4912	-0.145107	0.242726	-0.705532	0.3489	-0.419928	0.347871	0.318726	-0.35735	0.142439	-0.609138	0.0553896	-0.182453	0.496832	-0.0457269	-0.307527	-0.172909	-0.276986	0.352819
-4.7159	-1.35999	1.87635	0.0036108	-0.352114	-0.0793304	0.459425	-0.67293	-0.310029	0.0658882	0.425385	-0.24497	-0.327677	-0.694846	0.0377313	-0.138513	-0.639943	0.0778663	0.0792484	-0.14177	-0.55395	-0.197329	-0.384064	0.0603716	0.375586	-0.507925	-0.00555077	-0.317584	0.0271794	0.0593992	-0.0624088	1.49442	-0.148555	0.242312	-0.705428	0.352295	-0.420426	0.346559	0.317445	-0.355792	0.1424	-0.608482	0.0551043	-0.183074	0.496107	-0.0469547	-0.307387	-0.170181	-0.27538	0.351483
-4.71492	-1.35972	1.87909	0.00414528	-0.352715	-0.0795874	0.464111	-0.673289	-0.308396	0.0666279	0.42514	-0.243236	-0.325475	-0.695918	0.0364534	-0.140391	-0.639967	0.0777713	0.0792309	-0.139953	-0.553427	-0.197175	-0.383495	0.0590534	0.376662	-0.50816	-0.00498792	-0.319017	0.0279228	0.059916	-0.063354	1.4976	-0.151984	0.241875	-0.705334	0.35571	-0.420913	0.345241	0.316171	-0.354243	0.142345	-0.607828	0.0548239	-0.183705	0.495362	-0.0481841	-0.307249	-0.167439	-0.273769	0.350125
-4.71394	-1.35945	1.88183	0.00466963	-0.353313	-0.0798463	0.468816	-0.673652	-0.306776	0.0673723	0.424884	-0.241489	-0.323239	-0.696975	0.0351595	-0.142256	-0.639965	0.0776702	0.079226	-0.138137	-0.552908	-0.19702	-0.382917	0.0577392	0.377736	-0.5084	-0.00443635	-0.320438	0.0286493	0.0604339	-0.0642992	1.50075	-0.155395	0.241416	-0.705249	0.359143	-0.421388	0.343915	0.314901	-0.352703	0.142273	-0.607178	0.0545487	-0.184344	0.494596	-0.0494149	-0.307113	-0.164685	-0.272153	0.348745
-4.71295	-1.35916	1.88454	0.00518375	-0.353909	-0.0801067	0.473539	-0.67402	-0.305169	0.0681212	0.424619	-0.239729	-0.32097	-0.698016	0.03385	-0.14411	-0.639935	0.0775632	0.0792336	-0.136319	-0.552395	-0.196866	-0.382331	0.0564291	0.378809	-0.508644	-0.00389608	-0.321847	0.0293587	0.0609529	-0.0652443	1.50386	-0.158786	0.240935	-0.705174	0.362594	-0.421852	0.342583	0.313637	-0.351172	0.142185	-0.606531	0.0542785	-0.184993	0.493808	-0.0506468	-0.306979	-0.161917	-0.270533	0.347343
-4.71197	-1.35886	1.88724	0.00568754	-0.354502	-0.0803686	0.47828	-0.674393	-0.303576	0.0688746	0.424344	-0.237958	-0.318669	-0.699043	0.0325249	-0.145952	-0.639878	0.0774504	0.0792538	-0.134502	-0.551888	-0.196712	-0.381736	0.0551234	0.379879	-0.508892	-0.00336713	-0.323244	0.030051	0.0614728	-0.0661891	1.50694	-0.162157	0.240432	-0.705108	0.366064	-0.422305	0.341244	0.312378	-0.349648	0.142081	-0.605888	0.0540134	-0.185651	0.492999	-0.0518797	-0.306847	-0.159136	-0.268909	0.345919
-4.71099	-1.35854	1.88992	0.00618088	-0.355093	-0.0806318	0.483039	-0.67477	-0.301995	0.0696323	0.424059	-0.236174	-0.316334	-0.700054	0.0311845	-0.147781	-0.639793	0.077332	0.0792867	-0.132685	-0.551386	-0.196558	-0.381133	0.0538224	0.380946	-0.509145	-0.0028495	-0.324629	0.030726	0.0619936	-0.0671334	1.50998	-0.165509	0.239907	-0.705052	0.369551	-0.422746	0.339899	0.311126	-0.348134	0.14196	-0.605248	0.0537535	-0.186318	0.492169	-0.0531133	-0.306717	-0.156343	-0.267281	0.344474
-4.71	-1.35821	1.89259	0.00666366	-0.355682	-0.0808959	0.487815	-0.675151	-0.300429	0.0703942	0.423764	-0.234378	-0.313966	-0.701049	0.0298289	-0.149598	-0.639682	0.077208	0.0793321	-0.130868	-0.550889	-0.196405	-0.380523	0.0525263	0.382012	-0.509402	-0.0023432	-0.326002	0.0313836	0.0625154	-0.0680772	1.51298	-0.16884	0.239359	-0.705005	0.373057	-0.423176	0.338546	0.309879	-0.346628	0.141824	-0.604611	0.0534987	-0.186994	0.491318	-0.0543474	-0.30659	-0.153538	-0.265649	0.343006
-4.70902	-1.35787	1.89524	0.00713579	-0.356267	-0.0811608	0.492608	-0.675538	-0.298875	0.0711601	0.423459	-0.23257	-0.311566	-0.702029	0.0284585	-0.151402	-0.639542	0.0770787	0.07939	-0.129052	-0.550397	-0.196253	-0.379904	0.0512354	0.383074	-0.509663	-0.00184824	-0.327363	0.0320237	0.0630379	-0.0690203	1.51595	-0.172151	0.23879	-0.704967	0.37658	-0.423595	0.337188	0.308638	-0.345131	0.141671	-0.603979	0.0532492	-0.187679	0.490445	-0.0555818	-0.306464	-0.15072	-0.264014	0.341517
-4.70804	-1.35751	1.89788	0.00759716	-0.35685	-0.0814262	0.497418	-0.67593	-0.297335	0.07193	0.423143	-0.230751	-0.309133	-0.702993	0.0270733	-0.153193	-0.639375	0.0769441	0.0794606	-0.127237	-0.54991	-0.196101	-0.379277	0.04995	0.384134	-0.509929	-0.00136463	-0.328711	0.0326463	0.0635612	-0.0699627	1.51888	-0.175441	0.238199	-0.704939	0.380121	-0.424002	0.335823	0.307404	-0.343642	0.141502	-0.60335	0.0530049	-0.188374	0.489552	-0.0568163	-0.30634	-0.147891	-0.262375	0.340006
-4.70705	-1.35714	1.90049	0.00804765	-0.357429	-0.081692	0.502244	-0.676327	-0.295808	0.0727036	0.422818	-0.228921	-0.306668	-0.703942	0.0256736	-0.154972	-0.639181	0.0768044	0.0795437	-0.125423	-0.549428	-0.19595	-0.378642	0.0486701	0.385192	-0.510199	-0.000892361	-0.330048	0.0332512	0.0640852	-0.070904	1.52177	-0.17871	0.237586	-0.704921	0.383679	-0.424397	0.334451	0.306177	-0.342162	0.141318	-0.602725	0.0527659	-0.189077	0.488637	-0.0580507	-0.306219	-0.145051	-0.260733	0.338474
-4.70607	-1.35676	1.90309	0.00848718	-0.358005	-0.0819579	0.507086	-0.676729	-0.294295	0.073481	0.422482	-0.227079	-0.304171	-0.704875	0.0242596	-0.156737	-0.638959	0.0766599	0.0796393	-0.123609	-0.548952	-0.1958	-0.378	0.0473962	0.386246	-0.510473	-0.000431443	-0.331371	0.0338384	0.0646099	-0.0718444	1.52463	-0.181957	0.236951	-0.704912	0.387254	-0.424781	0.333073	0.304956	-0.340691	0.141118	-0.602104	0.0525321	-0.18979	0.487702	-0.0592847	-0.306099	-0.142199	-0.259088	0.33692
-4.70509	-1.35636	1.90567	0.00891564	-0.358578	-0.0822237	0.511944	-0.677137	-0.292795	0.074262	0.422136	-0.225227	-0.301642	-0.705793	0.0228315	-0.15849	-0.63871	0.0765105	0.0797475	-0.121798	-0.54848	-0.195652	-0.37735	0.0461285	0.387297	-0.510751	1.81269e-05	-0.332683	0.0344078	0.0651351	-0.0727835	1.52746	-0.185182	0.236295	-0.704912	0.390847	-0.425154	0.331689	0.303742	-0.339229	0.140902	-0.601487	0.0523037	-0.190511	0.486746	-0.0605182	-0.305981	-0.139337	-0.257441	0.335345
-4.7041	-1.35595	1.90823	0.00933291	-0.359147	-0.0824892	0.516818	-0.677551	-0.291309	0.0750463	0.421779	-0.223364	-0.299081	-0.706694	0.0213894	-0.160229	-0.638433	0.0763565	0.0798682	-0.119988	-0.548013	-0.195505	-0.376692	0.0448672	0.388345	-0.511033	0.00045635	-0.333982	0.0349593	0.0656609	-0.0737213	1.53024	-0.188386	0.235616	-0.704921	0.394456	-0.425514	0.330299	0.302534	-0.337775	0.14067	-0.600875	0.0520806	-0.191242	0.485768	-0.0617509	-0.305865	-0.136464	-0.25579	0.333749
-4.70312	-1.35552	1.91078	0.00973892	-0.359712	-0.0827541	0.521706	-0.67797	-0.289836	0.075834	0.421412	-0.22149	-0.296488	-0.70758	0.0199337	-0.161955	-0.638128	0.0761979	0.0800015	-0.118179	-0.547551	-0.195359	-0.376027	0.0436125	0.389389	-0.511319	0.000883229	-0.335268	0.0354928	0.0661872	-0.0746577	1.533	-0.191567	0.234917	-0.70494	0.398083	-0.425863	0.328902	0.301335	-0.33633	0.140423	-0.600267	0.0518629	-0.191981	0.48477	-0.0629826	-0.305751	-0.133581	-0.254137	0.332132
-4.70214	-1.35508	1.9133	0.0101335	-0.360274	-0.0830183	0.52661	-0.678396	-0.288377	0.0766249	0.421034	-0.219606	-0.293864	-0.70845	0.0184646	-0.163667	-0.637795	0.0760351	0.0801472	-0.116373	-0.547094	-0.195214	-0.375355	0.0423647	0.39043	-0.511608	0.00129877	-0.336541	0.0360082	0.0667138	-0.0755926	1.53571	-0.194725	0.234195	-0.704967	0.401726	-0.426201	0.3275	0.300142	-0.334894	0.14016	-0.599663	0.0516506	-0.192729	0.483751	-0.064213	-0.305639	-0.130688	-0.252482	0.330495
-4.70116	-1.35463	1.91581	0.0105167	-0.360831	-0.0832814	0.531527	-0.678827	-0.286931	0.0774189	0.420646	-0.217713	-0.291209	-0.709304	0.0169821	-0.165365	-0.637435	0.075868	0.0803054	-0.114569	-0.546642	-0.195072	-0.374676	0.041124	0.391467	-0.511902	0.00170298	-0.337802	0.0365054	0.0672409	-0.0765257	1.53839	-0.19786	0.233452	-0.705004	0.405385	-0.426527	0.326091	0.298957	-0.333467	0.139882	-0.599065	0.0514436	-0.193486	0.482711	-0.0654421	-0.305528	-0.127785	-0.250824	0.328836
-4.70017	-1.35416	1.91829	0.0108883	-0.361384	-0.0835433	0.536459	-0.679265	-0.285499	0.0782158	0.420247	-0.215809	-0.288522	-0.710142	0.0154867	-0.16705	-0.637047	0.0756969	0.0804761	-0.112768	-0.546194	-0.194931	-0.373989	0.0398907	0.392501	-0.5122	0.00209587	-0.339049	0.0369845	0.0677682	-0.0774571	1.54104	-0.200972	0.232688	-0.705051	0.40906	-0.426841	0.324676	0.29778	-0.332048	0.139589	-0.59847	0.0512421	-0.194252	0.48165	-0.0666695	-0.305419	-0.124872	-0.249165	0.327157
-4.69919	-1.35367	1.92076	0.0112482	-0.361932	-0.0838037	0.541405	-0.679709	-0.28408	0.0790155	0.419837	-0.213896	-0.285805	-0.710964	0.0139784	-0.168721	-0.636631	0.0755218	0.0806593	-0.110969	-0.54575	-0.194792	-0.373296	0.0386649	0.39353	-0.512501	0.00247745	-0.340284	0.0374453	0.0682957	-0.0783865	1.54365	-0.20406	0.231902	-0.705106	0.412752	-0.427143	0.323256	0.29661	-0.330638	0.13928	-0.597881	0.0510461	-0.195027	0.480569	-0.0678951	-0.305311	-0.121951	-0.247503	0.325457
-4.69821	-1.35318	1.92321	0.0115963	-0.362476	-0.0840625	0.546363	-0.68016	-0.282675	0.0798179	0.419417	-0.211973	-0.283057	-0.71177	0.0124575	-0.170378	-0.636187	0.0753431	0.0808548	-0.109174	-0.545312	-0.194655	-0.372595	0.0374471	0.394556	-0.512806	0.00284772	-0.341506	0.0378877	0.0688235	-0.0793138	1.54622	-0.207125	0.231095	-0.70517	0.416459	-0.427433	0.321829	0.295448	-0.329237	0.138957	-0.597296	0.0508554	-0.195811	0.479467	-0.0691187	-0.305205	-0.119021	-0.24584	0.323737
-4.69722	-1.35266	1.92563	0.0119326	-0.363015	-0.0843193	0.551335	-0.680617	-0.281283	0.0806229	0.418986	-0.210041	-0.280278	-0.71256	0.0109242	-0.17202	-0.635716	0.0751607	0.0810628	-0.107381	-0.544877	-0.19452	-0.371888	0.0362372	0.395578	-0.513115	0.00320672	-0.342715	0.0383118	0.0693513	-0.080239	1.54876	-0.210165	0.230266	-0.705243	0.420182	-0.427712	0.320397	0.294295	-0.327845	0.138618	-0.596717	0.0506703	-0.196603	0.478345	-0.0703399	-0.305101	-0.116082	-0.244176	0.321997
-4.69624	-1.35214	1.92804	0.0122569	-0.36355	-0.084574	0.55632	-0.681081	-0.279904	0.0814303	0.418544	-0.2081	-0.27747	-0.713334	0.00937882	-0.173649	-0.635217	0.0749749	0.0812832	-0.105592	-0.544447	-0.194388	-0.371175	0.0350357	0.396595	-0.513427	0.00355444	-0.343911	0.0387174	0.0698792	-0.0811619	1.55127	-0.213181	0.229417	-0.705326	0.423921	-0.427979	0.318959	0.29315	-0.326462	0.138265	-0.596142	0.0504906	-0.197404	0.477202	-0.0715587	-0.304998	-0.113135	-0.24251	0.320237
-4.69526	-1.3516	1.93042	0.0125691	-0.364079	-0.0848263	0.561317	-0.681551	-0.27854	0.08224	0.418091	-0.206151	-0.274631	-0.714092	0.00782149	-0.175263	-0.63469	0.0747857	0.0815159	-0.103807	-0.544022	-0.194257	-0.370454	0.0338427	0.397608	-0.513743	0.0038909	-0.345094	0.0391044	0.0704071	-0.0820823	1.55374	-0.216172	0.228546	-0.705417	0.427675	-0.428234	0.317516	0.292013	-0.325087	0.137897	-0.595573	0.0503164	-0.198213	0.476038	-0.0727747	-0.304897	-0.110179	-0.240843	0.318457
-4.69427	-1.35104	1.93279	0.0128693	-0.364603	-0.085076	0.566325	-0.682029	-0.277189	0.0830519	0.417627	-0.204192	-0.271762	-0.714834	0.00625246	-0.176862	-0.634135	0.0745935	0.0817609	-0.102025	-0.5436	-0.19413	-0.369728	0.0326584	0.398617	-0.514062	0.00421614	-0.346264	0.0394729	0.070935	-0.0830002	1.55617	-0.219139	0.227655	-0.705517	0.431444	-0.428477	0.316066	0.290884	-0.323721	0.137514	-0.595009	0.0501477	-0.199031	0.474855	-0.0739879	-0.304797	-0.107217	-0.239176	0.316657
-4.69329	-1.35047	1.93513	0.0131571	-0.365122	-0.0853229	0.571346	-0.682514	-0.275851	0.0838659	0.417152	-0.202226	-0.268863	-0.715559	0.00467197	-0.178447	-0.633553	0.0743983	0.0820183	-0.100247	-0.543183	-0.194005	-0.368995	0.0314832	0.399621	-0.514384	0.00453016	-0.34742	0.0398228	0.0714627	-0.0839155	1.55857	-0.22208	0.226743	-0.705626	0.435228	-0.428709	0.314612	0.289765	-0.322364	0.137117	-0.59445	0.0499845	-0.199858	0.473651	-0.0751979	-0.304698	-0.104247	-0.237507	0.314837
-4.69231	-1.34989	1.93745	0.0134327	-0.365635	-0.0855667	0.576377	-0.683005	-0.274527	0.0846817	0.416666	-0.200252	-0.265935	-0.716268	0.00308025	-0.180017	-0.632943	0.0742002	0.082288	-0.0984742	-0.54277	-0.193882	-0.368256	0.0303171	0.40062	-0.51471	0.00483298	-0.348563	0.040154	0.0719902	-0.0848279	1.56093	-0.224996	0.22581	-0.705744	0.439026	-0.428928	0.313151	0.288654	-0.321016	0.136705	-0.593897	0.0498268	-0.200693	0.472427	-0.0764046	-0.3046	-0.101269	-0.235838	0.312998
-4.69133	-1.34929	1.93975	0.0136958	-0.366143	-0.0858073	0.58142	-0.683505	-0.273216	0.0854994	0.416169	-0.19827	-0.262978	-0.716961	0.00147753	-0.181573	-0.632305	0.0739994	0.0825698	-0.0967054	-0.542361	-0.193763	-0.367511	0.0291604	0.401615	-0.515039	0.00512464	-0.349693	0.0404664	0.0725174	-0.0857375	1.56326	-0.227886	0.224856	-0.705871	0.442839	-0.429135	0.311686	0.287552	-0.319676	0.136279	-0.59335	0.0496747	-0.201536	0.471182	-0.0776077	-0.304504	-0.0982855	-0.234169	0.31114
-4.69034	-1.34867	1.94202	0.0139464	-0.366644	-0.0860443	0.586473	-0.684011	-0.271919	0.0863188	0.415661	-0.19628	-0.259992	-0.717638	-0.000135965	-0.183114	-0.631639	0.0737962	0.082864	-0.0949414	-0.541956	-0.193646	-0.36676	0.0280134	0.402604	-0.515372	0.00540515	-0.35081	0.0407602	0.0730443	-0.086644	1.56555	-0.23075	0.223881	-0.706006	0.446667	-0.429331	0.310215	0.286459	-0.318345	0.135839	-0.592808	0.049528	-0.202388	0.469918	-0.0788071	-0.304409	-0.0952951	-0.232499	0.309262
-4.68936	-1.34804	1.94428	0.0141844	-0.36714	-0.0862775	0.591536	-0.684526	-0.270635	0.0871397	0.415142	-0.194283	-0.256977	-0.718299	-0.00175999	-0.184639	-0.630945	0.0735905	0.0831703	-0.0931824	-0.541554	-0.193532	-0.366003	0.0268763	0.403589	-0.515707	0.00567454	-0.351913	0.0410351	0.0735709	-0.0875475	1.56781	-0.233588	0.222886	-0.70615	0.450509	-0.429515	0.308738	0.285376	-0.317023	0.135385	-0.592272	0.0493869	-0.203248	0.468634	-0.0800025	-0.304315	-0.0922986	-0.23083	0.307365
-4.68838	-1.3474	1.94651	0.0144097	-0.36763	-0.0865068	0.596608	-0.685047	-0.269365	0.0879621	0.414612	-0.192279	-0.253933	-0.718943	-0.0033943	-0.18615	-0.630224	0.0733827	0.0834887	-0.0914285	-0.541157	-0.193422	-0.365241	0.0257492	0.404569	-0.516046	0.00593285	-0.353003	0.0412911	0.074097	-0.0884476	1.57004	-0.236399	0.221871	-0.706303	0.454364	-0.429686	0.307256	0.284301	-0.31571	0.134917	-0.591741	0.0492513	-0.204116	0.46733	-0.0811937	-0.304222	-0.0892961	-0.22916	0.305449
-4.68739	-1.34674	1.94871	0.0146223	-0.368114	-0.0867318	0.60169	-0.685577	-0.268108	0.0887857	0.41407	-0.190268	-0.250861	-0.719571	-0.00503867	-0.187646	-0.629476	0.0731728	0.0838193	-0.0896801	-0.540763	-0.193315	-0.364473	0.0246324	0.405543	-0.516388	0.00618009	-0.354079	0.0415284	0.0746226	-0.0893444	1.57223	-0.239184	0.220836	-0.706464	0.458234	-0.429846	0.30577	0.283237	-0.314406	0.134436	-0.591217	0.0491212	-0.204993	0.466006	-0.0823806	-0.304129	-0.0862882	-0.227491	0.303515
-4.68641	-1.34606	1.9509	0.014822	-0.368591	-0.0869524	0.606781	-0.686114	-0.266865	0.0896105	0.413517	-0.18825	-0.247761	-0.720183	-0.00669286	-0.189126	-0.628699	0.072961	0.0841619	-0.0879373	-0.540373	-0.193211	-0.3637	0.0235261	0.406512	-0.516732	0.00641631	-0.355142	0.0417467	0.0751476	-0.0902377	1.57438	-0.241942	0.21978	-0.706633	0.462116	-0.429993	0.304278	0.282182	-0.31311	0.133941	-0.590699	0.0489967	-0.205878	0.464662	-0.0835628	-0.304038	-0.083275	-0.225823	0.301562
-4.68543	-1.34537	1.95306	0.0150088	-0.369061	-0.0871684	0.611881	-0.68666	-0.265635	0.0904364	0.412953	-0.186226	-0.244633	-0.720778	-0.00835661	-0.190591	-0.627895	0.0727474	0.0845166	-0.0862003	-0.539987	-0.19311	-0.362921	0.0224305	0.407476	-0.51708	0.00664153	-0.356191	0.0419461	0.075672	-0.0911275	1.57651	-0.244673	0.218704	-0.706812	0.466013	-0.430129	0.302781	0.281136	-0.311823	0.133432	-0.590187	0.0488776	-0.20677	0.463299	-0.0847403	-0.303948	-0.0802569	-0.224155	0.29959
-4.68444	-1.34466	1.95519	0.0151825	-0.369525	-0.0873794	0.616989	-0.687213	-0.264419	0.0912631	0.412378	-0.184196	-0.241478	-0.721358	-0.0100297	-0.192041	-0.627064	0.0725323	0.0848833	-0.0844695	-0.539604	-0.193013	-0.362138	0.0213459	0.408435	-0.51743	0.00685579	-0.357227	0.0421265	0.0761957	-0.0920135	1.57859	-0.247376	0.217608	-0.706998	0.469922	-0.430252	0.301279	0.280101	-0.310544	0.13291	-0.589681	0.0487641	-0.207671	0.461917	-0.0859127	-0.303858	-0.0772341	-0.222488	0.297601
-4.68346	-1.34394	1.9573	0.0153432	-0.369983	-0.0875852	0.622104	-0.687775	-0.263216	0.0920907	0.411791	-0.18216	-0.238295	-0.72192	-0.0117119	-0.193475	-0.626205	0.0723157	0.085262	-0.0827449	-0.539224	-0.19292	-0.361349	0.0202723	0.409387	-0.517783	0.00705912	-0.35825	0.0422879	0.0767186	-0.0928957	1.58065	-0.250052	0.216493	-0.707193	0.473844	-0.430363	0.299772	0.279075	-0.309275	0.132375	-0.589181	0.048656	-0.20858	0.460515	-0.0870799	-0.303769	-0.074207	-0.220822	0.295593
-4.68248	-1.3432	1.95939	0.0154906	-0.370433	-0.0877857	0.627227	-0.688344	-0.262027	0.0929189	0.411193	-0.180118	-0.235085	-0.722467	-0.0134029	-0.194893	-0.625318	0.0720979	0.0856526	-0.081027	-0.538848	-0.19283	-0.360556	0.0192101	0.410335	-0.518139	0.00725156	-0.359259	0.0424304	0.0772407	-0.0937739	1.58267	-0.2527	0.215357	-0.707396	0.477779	-0.430463	0.29826	0.27806	-0.308014	0.131826	-0.588688	0.0485535	-0.209496	0.459093	-0.0882417	-0.303681	-0.0711759	-0.219157	0.293567
-4.6815	-1.34245	1.96145	0.0156248	-0.370876	-0.0879806	0.632357	-0.688922	-0.260851	0.0937477	0.410584	-0.178071	-0.231848	-0.722997	-0.0151025	-0.196297	-0.624404	0.071879	0.0860551	-0.0793157	-0.538475	-0.192745	-0.359757	0.0181594	0.411276	-0.518498	0.00743316	-0.360254	0.0425539	0.0777619	-0.0946481	1.58465	-0.25532	0.214202	-0.707607	0.481726	-0.43055	0.296743	0.277055	-0.306761	0.131265	-0.588201	0.0484564	-0.210421	0.457653	-0.0893979	-0.303593	-0.0681412	-0.217494	0.291523
-4.68051	-1.34168	1.96349	0.0157457	-0.371312	-0.0881696	0.637494	-0.689509	-0.259688	0.0945768	0.409963	-0.176018	-0.228585	-0.723511	-0.0168105	-0.197684	-0.623463	0.071659	0.0864694	-0.0776115	-0.538105	-0.192663	-0.358954	0.0171205	0.412212	-0.518859	0.00760394	-0.361236	0.0426583	0.0782821	-0.0955182	1.5866	-0.257912	0.213028	-0.707827	0.485686	-0.430625	0.295221	0.27606	-0.305518	0.130691	-0.587721	0.0483648	-0.211353	0.456194	-0.0905482	-0.303506	-0.065103	-0.215832	0.289462
-4.67953	-1.3409	1.9655	0.0158531	-0.371741	-0.0883526	0.642637	-0.690104	-0.258538	0.0954063	0.409331	-0.173961	-0.225295	-0.724009	-0.0185265	-0.199056	-0.622495	0.0714383	0.0868955	-0.0759145	-0.537738	-0.192585	-0.358147	0.0160935	0.413141	-0.519222	0.00776395	-0.362204	0.0427437	0.0788013	-0.096384	1.58852	-0.260475	0.211834	-0.708054	0.489657	-0.430688	0.293695	0.275075	-0.304282	0.130105	-0.587248	0.0482787	-0.212292	0.454715	-0.0916925	-0.303419	-0.0620617	-0.214172	0.287383
-4.67855	-1.3401	1.96749	0.015947	-0.372162	-0.0885293	0.647786	-0.690707	-0.257402	0.0962359	0.408687	-0.171899	-0.221979	-0.72449	-0.0202504	-0.200412	-0.621499	0.071217	0.0873334	-0.074225	-0.537375	-0.192511	-0.357335	0.0150786	0.414065	-0.519588	0.00791323	-0.363158	0.0428101	0.0793194	-0.0972454	1.5904	-0.26301	0.210621	-0.70829	0.493641	-0.430739	0.292164	0.274102	-0.303056	0.129506	-0.586781	0.048198	-0.21324	0.453218	-0.0928305	-0.303333	-0.0590177	-0.212514	0.285287
-4.67756	-1.33929	1.96944	0.0160274	-0.372575	-0.0886994	0.65294	-0.691319	-0.256279	0.0970656	0.408032	-0.169833	-0.218637	-0.724955	-0.0219819	-0.201752	-0.620476	0.0709951	0.0877829	-0.0725431	-0.537014	-0.192442	-0.356519	0.014076	0.414983	-0.519956	0.00805183	-0.364099	0.0428574	0.0798363	-0.0981024	1.59225	-0.265516	0.209389	-0.708534	0.497636	-0.430778	0.290629	0.273138	-0.301838	0.128895	-0.586321	0.0481228	-0.214194	0.451703	-0.0939621	-0.303247	-0.0559712	-0.210858	0.283174
-4.67658	-1.33846	1.97138	0.0160941	-0.372981	-0.0888628	0.658099	-0.69194	-0.25517	0.0978951	0.407366	-0.167762	-0.21527	-0.725404	-0.0237208	-0.203076	-0.619426	0.070773	0.0882442	-0.0708691	-0.536656	-0.192377	-0.3557	0.0130859	0.415894	-0.520327	0.00817979	-0.365026	0.0428857	0.080352	-0.0989547	1.59407	-0.267993	0.208138	-0.708785	0.501642	-0.430804	0.289089	0.272186	-0.300628	0.128272	-0.585868	0.048053	-0.215157	0.450168	-0.095087	-0.303161	-0.0529226	-0.209204	0.281044
-4.6756	-1.33761	1.97328	0.0161472	-0.373379	-0.0890192	0.663262	-0.69257	-0.254073	0.0987245	0.406688	-0.165687	-0.211878	-0.725836	-0.0254668	-0.204384	-0.618349	0.0705506	0.088717	-0.0692033	-0.536301	-0.192316	-0.354876	0.0121085	0.4168	-0.5207	0.00829716	-0.36594	0.0428949	0.0808664	-0.0998024	1.59585	-0.27044	0.206868	-0.709045	0.50566	-0.430819	0.287544	0.271244	-0.299427	0.127637	-0.585422	0.0479885	-0.216126	0.448615	-0.0962051	-0.303075	-0.0498722	-0.207553	0.278897
-4.67461	-1.33675	1.97516	0.0161864	-0.373768	-0.0891684	0.66843	-0.693208	-0.25299	0.0995535	0.405999	-0.163609	-0.20846	-0.726252	-0.0272195	-0.205677	-0.617245	0.0703282	0.0892013	-0.0675457	-0.535949	-0.192259	-0.354048	0.0111439	0.417699	-0.521075	0.00840399	-0.36684	0.0428851	0.0813795	-0.100645	1.5976	-0.272859	0.205579	-0.709312	0.509688	-0.430821	0.285995	0.270313	-0.298234	0.12699	-0.584983	0.0479295	-0.217103	0.447044	-0.0973161	-0.30299	-0.0468202	-0.205904	0.276734
-4.67363	-1.33587	1.97701	0.0162118	-0.37415	-0.0893101	0.673602	-0.693856	-0.25192	0.100382	0.405298	-0.161528	-0.205018	-0.726652	-0.0289789	-0.206953	-0.616114	0.070106	0.0896972	-0.0658968	-0.535599	-0.192207	-0.353217	0.0101925	0.418592	-0.521452	0.00850032	-0.367726	0.0428563	0.0818911	-0.101483	1.59932	-0.275247	0.204272	-0.709587	0.513727	-0.430811	0.284442	0.269394	-0.29705	0.126331	-0.584551	0.0478758	-0.218087	0.445455	-0.0984199	-0.302904	-0.0437671	-0.204259	0.274554
-4.67265	-1.33498	1.97884	0.0162232	-0.374524	-0.0894442	0.678777	-0.694512	-0.250863	0.10121	0.404585	-0.159443	-0.201551	-0.727036	-0.0307446	-0.208213	-0.614956	0.0698841	0.0902045	-0.0642567	-0.535252	-0.19216	-0.352382	0.00925423	0.419478	-0.521831	0.00858621	-0.368599	0.0428085	0.0824013	-0.102316	1.601	-0.277606	0.202946	-0.709869	0.517777	-0.430789	0.282885	0.268485	-0.295874	0.125661	-0.584126	0.0478274	-0.219078	0.443848	-0.0995163	-0.302818	-0.040713	-0.202616	0.272358
-4.67166	-1.33407	1.98063	0.0162207	-0.374889	-0.0895704	0.683955	-0.695178	-0.249819	0.102037	0.403862	-0.157355	-0.19806	-0.727403	-0.0325164	-0.209457	-0.613772	0.0696626	0.0907231	-0.0626256	-0.534907	-0.192117	-0.351544	0.00832943	0.420358	-0.522212	0.00866171	-0.369458	0.0427416	0.0829099	-0.103144	1.60265	-0.279935	0.201602	-0.710159	0.521837	-0.430755	0.281323	0.267588	-0.294707	0.12498	-0.583709	0.0477844	-0.220076	0.442223	-0.100605	-0.302732	-0.0376584	-0.200976	0.270146
-4.67068	-1.33315	1.9824	0.0162041	-0.375245	-0.0896884	0.689136	-0.695852	-0.248789	0.102864	0.403126	-0.155265	-0.194546	-0.727755	-0.034294	-0.210685	-0.612561	0.0694417	0.0912531	-0.0610037	-0.534565	-0.192079	-0.350702	0.00741821	0.421231	-0.522594	0.00872687	-0.370304	0.0426557	0.0834169	-0.103967	1.60427	-0.282234	0.20024	-0.710457	0.525906	-0.430709	0.279757	0.266702	-0.293548	0.124288	-0.583299	0.0477466	-0.221082	0.44058	-0.101686	-0.302646	-0.0346036	-0.19934	0.267919
-4.6697	-1.33221	1.98414	0.0161734	-0.375593	-0.0897981	0.694319	-0.696536	-0.247771	0.103689	0.402379	-0.153172	-0.191007	-0.72809	-0.0360772	-0.211897	-0.611323	0.0692216	0.0917944	-0.0593913	-0.534224	-0.192046	-0.349858	0.00652077	0.422098	-0.522979	0.00878174	-0.371135	0.0425509	0.0839222	-0.104784	1.60586	-0.284503	0.19886	-0.710762	0.529986	-0.430651	0.278187	0.265827	-0.292397	0.123584	-0.582896	0.0477141	-0.222093	0.438919	-0.102759	-0.302559	-0.0315488	-0.197707	0.265675
-4.66872	-1.33125	1.98586	0.0161285	-0.375932	-0.0898992	0.699503	-0.697229	-0.246767	0.104514	0.401621	-0.151077	-0.187446	-0.728409	-0.0378657	-0.213093	-0.610059	0.0690024	0.0923469	-0.0577886	-0.533886	-0.192018	-0.34901	0.00563727	0.422958	-0.523365	0.00882638	-0.371954	0.0424271	0.0844257	-0.105596	1.60741	-0.286741	0.197462	-0.711074	0.534075	-0.43058	0.276613	0.264964	-0.291254	0.12287	-0.582501	0.0476869	-0.223112	0.437241	-0.103823	-0.302473	-0.0284944	-0.196078	0.263416
-4.66773	-1.33028	1.98754	0.0160694	-0.376262	-0.0899916	0.704689	-0.697932	-0.245775	0.105337	0.400851	-0.14898	-0.183861	-0.728712	-0.0396592	-0.214272	-0.608768	0.0687842	0.0929105	-0.0561958	-0.533551	-0.191995	-0.34816	0.00476788	0.423811	-0.523753	0.00886085	-0.372759	0.0422844	0.0849274	-0.106402	1.60893	-0.288948	0.196047	-0.711394	0.538173	-0.430498	0.275034	0.264113	-0.29012	0.122146	-0.582114	0.0476648	-0.224137	0.435545	-0.104879	-0.302385	-0.0254407	-0.194453	0.261142
-4.66675	-1.32929	1.98919	0.015996	-0.376583	-0.0900748	0.709876	-0.698643	-0.244796	0.106159	0.400069	-0.146881	-0.180254	-0.728998	-0.0414575	-0.215435	-0.607452	0.0685673	0.0934852	-0.0546132	-0.533217	-0.191977	-0.347307	0.00391276	0.424658	-0.524143	0.0088852	-0.37355	0.0421228	0.0854272	-0.107203	1.61042	-0.291125	0.194614	-0.711721	0.54228	-0.430403	0.273452	0.263273	-0.288994	0.121411	-0.581734	0.047648	-0.225169	0.433833	-0.105927	-0.302297	-0.022388	-0.192832	0.258853
-4.66577	-1.32829	1.99082	0.0159082	-0.376895	-0.0901489	0.715063	-0.699365	-0.24383	0.106979	0.399277	-0.144781	-0.176624	-0.729269	-0.0432603	-0.216582	-0.606109	0.0683517	0.094071	-0.0530409	-0.532885	-0.191964	-0.346452	0.00307208	0.425498	-0.524534	0.0088995	-0.374328	0.0419423	0.0859251	-0.107998	1.61187	-0.293271	0.193163	-0.712055	0.546396	-0.430296	0.271866	0.262445	-0.287876	0.120666	-0.581362	0.0476362	-0.226208	0.432103	-0.106965	-0.302209	-0.0193366	-0.191215	0.256549
-4.66478	-1.32727	1.99241	0.015806	-0.377198	-0.0902135	0.72025	-0.700095	-0.242877	0.107798	0.398472	-0.14268	-0.172972	-0.729524	-0.0450674	-0.217713	-0.60474	0.0681377	0.0946677	-0.0514792	-0.532554	-0.191956	-0.345594	0.00224601	0.426331	-0.524926	0.0089038	-0.375092	0.0417429	0.086421	-0.108787	1.6133	-0.295386	0.191696	-0.712396	0.550521	-0.430177	0.270277	0.261628	-0.286766	0.119911	-0.580997	0.0476296	-0.227252	0.430357	-0.107995	-0.302119	-0.0162869	-0.189603	0.25423
-4.6638	-1.32623	1.99398	0.0156893	-0.377492	-0.0902684	0.725437	-0.700835	-0.241937	0.108615	0.397656	-0.140578	-0.169298	-0.729762	-0.0468785	-0.218827	-0.603345	0.0679253	0.0952753	-0.0499282	-0.532226	-0.191953	-0.344734	0.0014347	0.427157	-0.52532	0.00889816	-0.375843	0.0415248	0.0869148	-0.109571	1.61469	-0.29747	0.190211	-0.712744	0.554653	-0.430046	0.268683	0.260824	-0.285664	0.119146	-0.580641	0.0476281	-0.228304	0.428593	-0.109016	-0.302029	-0.0132391	-0.187995	0.251897
-4.66282	-1.32518	1.99551	0.015558	-0.377776	-0.0903134	0.730623	-0.701585	-0.24101	0.109431	0.396829	-0.138476	-0.165603	-0.729985	-0.0486934	-0.219925	-0.601924	0.0677148	0.0958937	-0.0483883	-0.531899	-0.191956	-0.343872	0.000638301	0.427976	-0.525715	0.00888265	-0.37658	0.0412879	0.0874064	-0.110348	1.61605	-0.299523	0.188709	-0.713099	0.558794	-0.429902	0.267086	0.260031	-0.28457	0.118371	-0.580292	0.0476316	-0.229361	0.426814	-0.110027	-0.301938	-0.0101937	-0.186392	0.24955
-4.66183	-1.32411	1.99702	0.0154122	-0.378051	-0.0903482	0.735808	-0.702345	-0.240095	0.110244	0.39599	-0.136373	-0.161887	-0.730192	-0.0505117	-0.221006	-0.600478	0.0675062	0.0965229	-0.0468597	-0.531574	-0.191964	-0.343008	-0.000143024	0.428788	-0.526111	0.00885733	-0.377305	0.0410323	0.0878958	-0.11112	1.61738	-0.301544	0.187191	-0.713461	0.562943	-0.429747	0.265485	0.259251	-0.283484	0.117587	-0.579952	0.0476401	-0.230424	0.425017	-0.111028	-0.301847	-0.00715078	-0.184793	0.247188
-4.66085	-1.32303	1.99849	0.0152518	-0.378315	-0.0903727	0.740991	-0.703114	-0.239194	0.111056	0.395139	-0.13427	-0.158149	-0.730383	-0.0523332	-0.222071	-0.599005	0.0672998	0.0971628	-0.0453425	-0.53125	-0.191977	-0.342143	-0.000909126	0.429593	-0.526508	0.00882226	-0.378015	0.0407579	0.0883829	-0.111885	1.61867	-0.303534	0.185656	-0.71383	0.567099	-0.429579	0.26388	0.258482	-0.282406	0.116794	-0.579619	0.0476535	-0.231493	0.423205	-0.11202	-0.301754	-0.00411081	-0.1832	0.244813
-4.65987	-1.32193	1.99994	0.0150767	-0.378571	-0.0903867	0.746172	-0.703892	-0.238304	0.111865	0.394277	-0.132167	-0.154391	-0.730558	-0.0541577	-0.22312	-0.597508	0.0670957	0.0978133	-0.043837	-0.530928	-0.191996	-0.341276	-0.00165986	0.430391	-0.526906	0.0087775	-0.378713	0.040465	0.0888677	-0.112644	1.61994	-0.305492	0.184105	-0.714205	0.571262	-0.4294	0.262272	0.257726	-0.281336	0.115992	-0.579294	0.0476719	-0.232568	0.421376	-0.113002	-0.301659	-0.00107406	-0.181612	0.242424
-4.65889	-1.32081	2.00135	0.0148868	-0.378816	-0.0903899	0.751351	-0.70468	-0.237428	0.112672	0.393404	-0.130065	-0.150613	-0.730717	-0.0559849	-0.224153	-0.595985	0.066894	0.0984743	-0.0423433	-0.530606	-0.19202	-0.340407	-0.00239507	0.431182	-0.527306	0.00872313	-0.379397	0.0401534	0.0893501	-0.113396	1.62117	-0.307418	0.182537	-0.714587	0.575432	-0.429208	0.26066	0.256982	-0.280274	0.115181	-0.578978	0.0476952	-0.233649	0.419532	-0.113973	-0.301564	0.00195915	-0.18003	0.240021
-4.6579	-1.31968	2.00273	0.0146822	-0.379051	-0.0903821	0.756526	-0.705479	-0.236564	0.113477	0.392519	-0.127963	-0.146815	-0.730861	-0.0578145	-0.225169	-0.594437	0.0666948	0.0991458	-0.0408618	-0.530286	-0.19205	-0.339537	-0.00311462	0.431966	-0.527706	0.00865921	-0.380068	0.0398234	0.08983	-0.114142	1.62237	-0.309312	0.180954	-0.714975	0.579609	-0.429005	0.259045	0.25625	-0.279219	0.114361	-0.57867	0.0477234	-0.234736	0.417672	-0.114935	-0.301468	0.00498849	-0.178453	0.237605
-4.65692	-1.31853	2.00408	0.0144627	-0.379277	-0.0903631	0.761699	-0.706286	-0.235712	0.114279	0.391623	-0.125862	-0.142998	-0.730988	-0.0596463	-0.226168	-0.592864	0.0664984	0.0998277	-0.0393926	-0.529968	-0.192086	-0.338666	-0.00381837	0.432742	-0.528107	0.00858581	-0.380725	0.0394748	0.0903074	-0.114882	1.62354	-0.311175	0.179355	-0.71537	0.583793	-0.428789	0.257427	0.25553	-0.278173	0.113533	-0.57837	0.0477563	-0.235828	0.415796	-0.115886	-0.30137	0.00801367	-0.176882	0.235176
-4.65594	-1.31737	2.0054	0.0142284	-0.379492	-0.0903327	0.766867	-0.707104	-0.234873	0.115079	0.390715	-0.123762	-0.139161	-0.7311	-0.06148	-0.227152	-0.591265	0.0663048	0.10052	-0.0379359	-0.52965	-0.192127	-0.337794	-0.00450618	0.433512	-0.528508	0.00850299	-0.38137	0.0391078	0.0907821	-0.115615	1.62468	-0.313005	0.17774	-0.715771	0.587982	-0.428561	0.255805	0.254823	-0.277134	0.112696	-0.578079	0.047794	-0.236925	0.413905	-0.116826	-0.30127	0.0110344	-0.175316	0.232735
-4.65495	-1.31619	2.00669	0.0139791	-0.379697	-0.0902907	0.772031	-0.707932	-0.234047	0.115875	0.389796	-0.121664	-0.135305	-0.731197	-0.0633154	-0.228119	-0.589642	0.0661143	0.101222	-0.0364919	-0.529333	-0.192174	-0.33692	-0.00517791	0.434274	-0.528911	0.00841083	-0.382001	0.0387224	0.0912542	-0.116341	1.62579	-0.314803	0.176109	-0.716178	0.592178	-0.428322	0.25418	0.254128	-0.276102	0.111851	-0.577796	0.0478364	-0.238028	0.411999	-0.117755	-0.301169	0.0140502	-0.173757	0.23028
-4.65397	-1.315	2.00794	0.0137149	-0.379891	-0.0902369	0.777191	-0.708769	-0.233233	0.116669	0.388865	-0.119568	-0.13143	-0.731278	-0.0651521	-0.229069	-0.587994	0.0659269	0.101935	-0.0350609	-0.529016	-0.192227	-0.336047	-0.00583343	0.435029	-0.529313	0.00830939	-0.382619	0.0383188	0.0917235	-0.117061	1.62687	-0.316569	0.174463	-0.716591	0.596379	-0.42807	0.252552	0.253446	-0.275078	0.110999	-0.577521	0.0478835	-0.239136	0.410077	-0.118673	-0.301066	0.017061	-0.172204	0.227814
-4.65299	-1.31379	2.00916	0.0134357	-0.380075	-0.090171	0.782345	-0.709616	-0.232431	0.11746	0.387923	-0.117473	-0.127537	-0.731343	-0.0669899	-0.230004	-0.586322	0.0657428	0.102658	-0.0336431	-0.528701	-0.192285	-0.335173	-0.00647262	0.435776	-0.529717	0.00819876	-0.383225	0.0378969	0.0921901	-0.117773	1.62792	-0.318302	0.172802	-0.717011	0.600586	-0.427807	0.250921	0.252776	-0.274062	0.110139	-0.577255	0.0479352	-0.240249	0.408141	-0.11958	-0.300962	0.0200664	-0.170658	0.225335
-4.652	-1.31256	2.01035	0.0131415	-0.380249	-0.0900929	0.787494	-0.710473	-0.231641	0.118248	0.38697	-0.115381	-0.123626	-0.731393	-0.0688286	-0.230922	-0.584625	0.0655622	0.103391	-0.0322386	-0.528386	-0.19235	-0.334298	-0.00709533	0.436517	-0.53012	0.00807899	-0.383817	0.0374568	0.0926538	-0.118479	1.62893	-0.320003	0.171126	-0.717436	0.604797	-0.427531	0.249286	0.252119	-0.273053	0.109271	-0.576997	0.0479915	-0.241367	0.40619	-0.120476	-0.300856	0.023066	-0.169118	0.222844
-4.65102	-1.31132	2.01151	0.0128321	-0.380412	-0.0900023	0.792637	-0.71134	-0.230864	0.119033	0.386005	-0.113291	-0.119698	-0.731428	-0.0706678	-0.231824	-0.582904	0.0653851	0.104133	-0.0308478	-0.528072	-0.19242	-0.333423	-0.00770145	0.43725	-0.530525	0.00795016	-0.384397	0.0369987	0.0931145	-0.119178	1.62992	-0.321671	0.169436	-0.717868	0.609014	-0.427244	0.247649	0.251474	-0.272051	0.108396	-0.576749	0.0480523	-0.24249	0.404225	-0.12136	-0.300748	0.0260595	-0.167585	0.220341
-4.65004	-1.31006	2.01263	0.0125077	-0.380564	-0.0898991	0.797774	-0.712217	-0.230099	0.119815	0.385029	-0.111204	-0.115752	-0.731447	-0.0725074	-0.232709	-0.581159	0.0652118	0.104886	-0.0294707	-0.527758	-0.192496	-0.332548	-0.00829086	0.437975	-0.530929	0.00781235	-0.384964	0.0365225	0.0935723	-0.119869	1.63088	-0.323307	0.16773	-0.718305	0.613235	-0.426944	0.246009	0.250842	-0.271057	0.107515	-0.576508	0.0481176	-0.243618	0.402245	-0.122232	-0.300637	0.0290467	-0.166058	0.217827
-4.64905	-1.30879	2.01372	0.0121682	-0.380706	-0.0897831	0.802904	-0.713104	-0.229346	0.120593	0.384042	-0.10912	-0.111789	-0.731451	-0.0743471	-0.233578	-0.57939	0.0650423	0.105648	-0.0281076	-0.527444	-0.192578	-0.331673	-0.00886343	0.438694	-0.531333	0.00766563	-0.385518	0.0360283	0.094027	-0.120554	1.6318	-0.32491	0.166011	-0.718748	0.617461	-0.426633	0.244365	0.250223	-0.27007	0.106626	-0.576277	0.0481873	-0.244751	0.400252	-0.123093	-0.300525	0.0320273	-0.164539	0.215302
-4.64807	-1.3075	2.01478	0.0118134	-0.380837	-0.089654	0.808026	-0.714	-0.228605	0.121368	0.383044	-0.107039	-0.107809	-0.731439	-0.0761865	-0.234431	-0.577597	0.0648768	0.10642	-0.0267587	-0.527131	-0.192666	-0.330798	-0.00941905	0.439405	-0.531738	0.00751008	-0.386059	0.0355163	0.0944786	-0.121231	1.6327	-0.326481	0.164277	-0.719196	0.621691	-0.42631	0.242719	0.249616	-0.26909	0.105731	-0.576054	0.0482614	-0.245887	0.398244	-0.123941	-0.300411	0.0350008	-0.163027	0.212765
-4.64709	-1.30619	2.0158	0.0114435	-0.380957	-0.0895117	0.813141	-0.714907	-0.227877	0.122139	0.382034	-0.104962	-0.103814	-0.731413	-0.0780255	-0.235268	-0.57578	0.0647155	0.107202	-0.0254242	-0.526818	-0.19276	-0.329924	-0.0099576	0.440109	-0.532143	0.00734576	-0.386588	0.0349865	0.0949271	-0.1219	1.63356	-0.328018	0.162529	-0.71965	0.625924	-0.425976	0.24107	0.249022	-0.268118	0.104829	-0.57584	0.0483397	-0.247029	0.396223	-0.124777	-0.300294	0.0379671	-0.161523	0.210218
-4.64611	-1.30487	2.01679	0.0110583	-0.381065	-0.089356	0.818248	-0.715823	-0.22716	0.122906	0.381013	-0.102889	-0.0998017	-0.731371	-0.0798637	-0.236089	-0.57394	0.0645584	0.107993	-0.0241044	-0.526505	-0.19286	-0.32905	-0.010479	0.440805	-0.532547	0.00717276	-0.387104	0.0344389	0.0953723	-0.122563	1.6344	-0.329523	0.160768	-0.720109	0.630161	-0.425629	0.239418	0.24844	-0.267153	0.103921	-0.575635	0.0484224	-0.248174	0.394188	-0.125601	-0.300175	0.0409257	-0.160026	0.207659
-4.64512	-1.30353	2.01775	0.0106579	-0.381163	-0.0891866	0.823346	-0.71675	-0.226455	0.123669	0.379981	-0.100819	-0.0957742	-0.731314	-0.081701	-0.236893	-0.572076	0.0644057	0.108793	-0.0227993	-0.526192	-0.192966	-0.328177	-0.0109831	0.441494	-0.532951	0.00699116	-0.387607	0.0338738	0.0958142	-0.123218	1.6352	-0.330995	0.158993	-0.720574	0.634401	-0.425271	0.237764	0.247872	-0.266194	0.103007	-0.575439	0.0485092	-0.249324	0.39214	-0.126411	-0.300054	0.0438764	-0.158537	0.205091
-4.64414	-1.30218	2.01867	0.0102422	-0.38125	-0.0890034	0.828435	-0.717686	-0.225762	0.124429	0.378938	-0.0987544	-0.0917315	-0.731242	-0.083537	-0.237682	-0.570189	0.0642576	0.109603	-0.0215092	-0.525879	-0.193079	-0.327305	-0.0114698	0.442176	-0.533356	0.00680102	-0.388099	0.0332911	0.0962527	-0.123865	1.63598	-0.332434	0.157204	-0.721044	0.638644	-0.424901	0.236106	0.247316	-0.265243	0.102088	-0.575252	0.0486002	-0.250477	0.390079	-0.12721	-0.29993	0.046819	-0.157055	0.202512
-4.64316	-1.30081	2.01955	0.00981121	-0.381325	-0.0888063	0.833515	-0.718633	-0.225081	0.125184	0.377884	-0.096694	-0.0876738	-0.731156	-0.0853714	-0.238454	-0.56828	0.0641141	0.110422	-0.0202343	-0.525565	-0.193197	-0.326434	-0.011939	0.44285	-0.533759	0.00660244	-0.388578	0.032691	0.0966878	-0.124505	1.63673	-0.33384	0.155403	-0.721519	0.642889	-0.424519	0.234447	0.246773	-0.264298	0.101163	-0.575074	0.0486952	-0.251635	0.388005	-0.127995	-0.299803	0.049753	-0.155582	0.199923
-4.64217	-1.29943	2.0204	0.00936487	-0.381389	-0.0885949	0.838585	-0.719589	-0.224412	0.125936	0.376818	-0.0946383	-0.0836015	-0.731054	-0.0872041	-0.239211	-0.566347	0.0639755	0.111251	-0.0189748	-0.525251	-0.193321	-0.325564	-0.0123906	0.443517	-0.534163	0.00639548	-0.389044	0.0320735	0.0971195	-0.125137	1.63745	-0.335213	0.153588	-0.721999	0.647137	-0.424126	0.232784	0.246243	-0.263361	0.100232	-0.574904	0.0487943	-0.252796	0.385918	-0.128767	-0.299674	0.0526782	-0.154117	0.197325
-4.64119	-1.29803	2.02122	0.00890318	-0.381442	-0.0883691	0.843645	-0.720555	-0.223755	0.126683	0.375742	-0.0925877	-0.0795149	-0.730938	-0.0890348	-0.239951	-0.564392	0.0638417	0.112088	-0.0177309	-0.524937	-0.193452	-0.324695	-0.0128245	0.444177	-0.534566	0.00618023	-0.389499	0.0314387	0.0975476	-0.125761	1.63813	-0.336552	0.151761	-0.722484	0.651387	-0.423721	0.23112	0.245726	-0.26243	0.0992964	-0.574744	0.0488974	-0.253961	0.383819	-0.129526	-0.299542	0.0555943	-0.15266	0.194717
-4.64021	-1.29662	2.022	0.00842613	-0.381484	-0.0881288	0.848694	-0.721531	-0.223109	0.127425	0.374654	-0.0905425	-0.0754145	-0.730807	-0.0908632	-0.240676	-0.562414	0.0637131	0.112934	-0.0165028	-0.524623	-0.193589	-0.323828	-0.0132406	0.444829	-0.534968	0.00595676	-0.389941	0.0307868	0.0979721	-0.126378	1.63879	-0.337859	0.149921	-0.722974	0.655639	-0.423305	0.229452	0.245221	-0.261506	0.0983559	-0.574593	0.0490043	-0.255129	0.381707	-0.130272	-0.299407	0.0585009	-0.151212	0.192099
-4.63922	-1.29519	2.02275	0.00793369	-0.381514	-0.0878738	0.853731	-0.722517	-0.222475	0.128164	0.373556	-0.0885029	-0.0713005	-0.730661	-0.092689	-0.241384	-0.560414	0.0635896	0.113789	-0.0152907	-0.524307	-0.193732	-0.322962	-0.0136388	0.445474	-0.53537	0.00572517	-0.390372	0.0301178	0.0983929	-0.126987	1.63942	-0.339132	0.148069	-0.723469	0.659892	-0.422877	0.227783	0.24473	-0.260589	0.0974106	-0.574452	0.0491151	-0.256301	0.379584	-0.131004	-0.299269	0.0613978	-0.149773	0.189473
-4.63824	-1.29374	2.02346	0.00742584	-0.381532	-0.0876038	0.858757	-0.723513	-0.221852	0.128897	0.372446	-0.0864691	-0.0671733	-0.730501	-0.0945119	-0.242077	-0.558391	0.0634714	0.114653	-0.0140947	-0.523991	-0.193881	-0.322098	-0.0140191	0.446112	-0.535771	0.00548552	-0.39079	0.0294319	0.0988101	-0.127587	1.64003	-0.340373	0.146204	-0.723968	0.664147	-0.422438	0.226111	0.244251	-0.259678	0.096461	-0.574319	0.0492297	-0.257476	0.377448	-0.131722	-0.299128	0.0642847	-0.148342	0.186837
-4.63726	-1.29228	2.02413	0.00690258	-0.381539	-0.0873188	0.863772	-0.724519	-0.221242	0.129627	0.371326	-0.0844414	-0.0630332	-0.730326	-0.0963318	-0.242754	-0.556347	0.0633587	0.115526	-0.0129151	-0.523675	-0.194036	-0.321236	-0.0143813	0.446742	-0.536171	0.00523789	-0.391197	0.0287291	0.0992234	-0.12818	1.6406	-0.34158	0.144328	-0.724472	0.668402	-0.421987	0.224437	0.243785	-0.258774	0.0955071	-0.574196	0.049348	-0.258654	0.375301	-0.132426	-0.298984	0.0671613	-0.146921	0.184193
-4.63628	-1.29081	2.02477	0.0063639	-0.381535	-0.0870185	0.868773	-0.725535	-0.220642	0.130351	0.370195	-0.0824201	-0.0588807	-0.730137	-0.0981484	-0.243416	-0.554281	0.0632515	0.116407	-0.011752	-0.523357	-0.194198	-0.320377	-0.0147254	0.447366	-0.536571	0.00498238	-0.391592	0.0280096	0.0996329	-0.128764	1.64114	-0.342754	0.14244	-0.72498	0.672658	-0.421525	0.22276	0.243332	-0.257876	0.0945491	-0.574082	0.0494699	-0.259835	0.373143	-0.133117	-0.298837	0.0700273	-0.145508	0.181541
-4.63529	-1.28932	2.02538	0.00580977	-0.381518	-0.0867027	0.873762	-0.72656	-0.220054	0.13107	0.369053	-0.0804054	-0.054716	-0.729933	-0.0999613	-0.244061	-0.552193	0.06315	0.117296	-0.0106056	-0.523038	-0.194365	-0.319519	-0.0150512	0.447982	-0.536969	0.00471906	-0.391975	0.0272734	0.100039	-0.129341	1.64166	-0.343894	0.14054	-0.725493	0.676914	-0.421052	0.221082	0.242892	-0.256985	0.0935874	-0.573977	0.0495954	-0.261019	0.370973	-0.133793	-0.298686	0.0728823	-0.144105	0.178881
-4.63431	-1.28781	2.02594	0.0052402	-0.38149	-0.0863713	0.878738	-0.727595	-0.219478	0.131785	0.3679	-0.0783976	-0.0505396	-0.729716	-0.10177	-0.244692	-0.550084	0.0630543	0.118194	-0.00947611	-0.522719	-0.194539	-0.318664	-0.0153587	0.44859	-0.537367	0.00444802	-0.392347	0.0265208	0.10044	-0.129909	1.64215	-0.345002	0.13863	-0.72601	0.681171	-0.420567	0.219401	0.242465	-0.2561	0.092622	-0.573882	0.0497244	-0.262205	0.368792	-0.134455	-0.298532	0.0757261	-0.142711	0.176212
-4.63333	-1.28629	2.02647	0.00465518	-0.381451	-0.0860242	0.8837	-0.72864	-0.218912	0.132494	0.366737	-0.0763969	-0.0463517	-0.729484	-0.103575	-0.245306	-0.547953	0.0629645	0.119101	-0.00836372	-0.522398	-0.19472	-0.317811	-0.0156479	0.449192	-0.537763	0.00416933	-0.392708	0.0257517	0.100838	-0.130469	1.64261	-0.346076	0.136708	-0.726531	0.685427	-0.420072	0.217718	0.242051	-0.255221	0.0916533	-0.573796	0.0498569	-0.263394	0.366601	-0.135102	-0.298375	0.0785584	-0.141327	0.173536
-4.63234	-1.28475	2.02697	0.0040547	-0.381399	-0.0856611	0.888647	-0.729695	-0.218358	0.133199	0.365562	-0.0744036	-0.0421528	-0.729237	-0.105376	-0.245905	-0.545802	0.0628807	0.120015	-0.00726858	-0.522076	-0.194906	-0.316962	-0.0159186	0.449786	-0.538158	0.00388308	-0.393057	0.0249663	0.101232	-0.131021	1.64304	-0.347117	0.134775	-0.727056	0.689682	-0.419565	0.216033	0.24165	-0.254348	0.0906815	-0.573719	0.0499927	-0.264585	0.364399	-0.135735	-0.298214	0.081379	-0.139953	0.170852
-4.63136	-1.2832	2.02743	0.00343875	-0.381336	-0.0852819	0.893581	-0.73076	-0.217816	0.133898	0.364378	-0.0724179	-0.0379431	-0.728977	-0.107172	-0.246489	-0.543629	0.0628031	0.120938	-0.00619087	-0.521752	-0.195099	-0.316115	-0.0161708	0.450373	-0.538552	0.00358936	-0.393395	0.0241647	0.101621	-0.131564	1.64344	-0.348125	0.132832	-0.727585	0.693937	-0.419046	0.214347	0.241261	-0.253482	0.0897068	-0.573652	0.0501319	-0.265779	0.362187	-0.136352	-0.298049	0.0841874	-0.138588	0.168162
-4.63038	-1.28164	2.02785	0.00280734	-0.38126	-0.0848864	0.898499	-0.731834	-0.217284	0.134592	0.363182	-0.07044	-0.0337231	-0.728703	-0.108963	-0.247058	-0.541436	0.0627317	0.121868	-0.00513077	-0.521427	-0.195297	-0.315271	-0.0164044	0.450953	-0.538944	0.00328824	-0.393721	0.0233471	0.102007	-0.132099	1.64382	-0.3491	0.130878	-0.728117	0.69819	-0.418517	0.212658	0.240885	-0.252622	0.0887293	-0.573594	0.0502742	-0.266975	0.359964	-0.136955	-0.297881	0.0869835	-0.137234	0.165464
-4.62939	-1.28005	2.02823	0.00216047	-0.381173	-0.0844745	0.903401	-0.732918	-0.216764	0.13528	0.361976	-0.0684703	-0.0294932	-0.728415	-0.110749	-0.247611	-0.539222	0.0626667	0.122807	-0.00408846	-0.521101	-0.195502	-0.31443	-0.0166193	0.451526	-0.539336	0.00297981	-0.394037	0.0225135	0.102388	-0.132626	1.64417	-0.350041	0.128915	-0.728654	0.702442	-0.417977	0.210967	0.240523	-0.251767	0.0877494	-0.573546	0.0504198	-0.268172	0.357732	-0.137543	-0.297709	0.0897669	-0.135889	0.162759
-4.62841	-1.27846	2.02858	0.00149814	-0.381074	-0.0840461	0.908288	-0.734011	-0.216255	0.135963	0.36076	-0.066509	-0.0252536	-0.728113	-0.11253	-0.248149	-0.536988	0.0626082	0.123753	-0.0030641	-0.520773	-0.195713	-0.313593	-0.0168155	0.452092	-0.539725	0.00266415	-0.394342	0.0216642	0.102765	-0.133144	1.64449	-0.35095	0.126941	-0.729194	0.706692	-0.417426	0.209275	0.240173	-0.250919	0.0867672	-0.573508	0.0505684	-0.269372	0.35549	-0.138116	-0.297533	0.0925374	-0.134555	0.160048
-4.62743	-1.27685	2.02889	0.000820344	-0.380963	-0.0836009	0.913159	-0.735114	-0.215756	0.13664	0.359533	-0.0645563	-0.0210048	-0.727798	-0.114305	-0.248672	-0.534734	0.0625563	0.124707	-0.00205786	-0.520443	-0.195931	-0.312759	-0.016993	0.452651	-0.540113	0.00234135	-0.394636	0.0207991	0.103137	-0.133653	1.64478	-0.351825	0.124958	-0.729737	0.71094	-0.416864	0.207581	0.239835	-0.250076	0.085783	-0.573478	0.05072	-0.270573	0.353239	-0.138673	-0.297353	0.0952946	-0.133232	0.157331
-4.62644	-1.27522	2.02916	0.000127098	-0.38084	-0.0831388	0.918013	-0.736227	-0.215269	0.137312	0.358295	-0.0626125	-0.016747	-0.727469	-0.116074	-0.24918	-0.53246	0.062511	0.125668	-0.0010699	-0.520111	-0.196154	-0.311929	-0.0171516	0.453203	-0.540499	0.0020115	-0.394919	0.0199185	0.103505	-0.134154	1.64505	-0.352667	0.122965	-0.730284	0.715186	-0.416291	0.205885	0.239511	-0.249239	0.0847971	-0.573459	0.0508746	-0.271775	0.350978	-0.139215	-0.297168	0.0980383	-0.131919	0.154608
-4.62546	-1.27358	2.0294	-0.000581594	-0.380705	-0.0826597	0.922849	-0.737349	-0.214793	0.137978	0.357047	-0.0606777	-0.0124808	-0.727126	-0.117837	-0.249673	-0.530167	0.0624726	0.126637	-0.000100397	-0.519778	-0.196384	-0.311103	-0.0172914	0.453748	-0.540884	0.00167467	-0.395192	0.0190225	0.103869	-0.134647	1.64529	-0.353477	0.120963	-0.730834	0.719429	-0.415707	0.204188	0.239199	-0.248408	0.0838095	-0.573449	0.0510321	-0.272979	0.348709	-0.139741	-0.29698	0.100768	-0.130617	0.151878
-4.62448	-1.27193	2.0296	-0.00130572	-0.380558	-0.0821634	0.927669	-0.738481	-0.214327	0.138637	0.355789	-0.0587524	-0.00820639	-0.72677	-0.119594	-0.250151	-0.527854	0.062441	0.127613	0.000850496	-0.519442	-0.19662	-0.310281	-0.0174121	0.454287	-0.541266	0.00133096	-0.395454	0.0181112	0.104228	-0.13513	1.6455	-0.354253	0.118952	-0.731387	0.723669	-0.415113	0.202489	0.238901	-0.247583	0.0828205	-0.573449	0.0511924	-0.274185	0.346431	-0.140252	-0.296788	0.103484	-0.129326	0.149144
-4.6235	-1.27026	2.02976	-0.00204528	-0.380399	-0.0816498	0.93247	-0.739622	-0.213872	0.139291	0.354521	-0.0568366	-0.00392418	-0.7264	-0.121344	-0.250615	-0.525521	0.0624164	0.128596	0.00178262	-0.519105	-0.196862	-0.309463	-0.017514	0.454818	-0.541647	0.000980436	-0.395706	0.0171848	0.104583	-0.135605	1.64569	-0.354996	0.116932	-0.731944	0.727905	-0.414508	0.200788	0.238614	-0.246763	0.0818305	-0.573458	0.0513553	-0.275391	0.344144	-0.140747	-0.296591	0.106186	-0.128046	0.146404
-4.62251	-1.26858	2.02988	-0.00280025	-0.380228	-0.0811187	0.937253	-0.740772	-0.213428	0.139939	0.353242	-0.0549307	0.000365452	-0.726018	-0.123087	-0.251064	-0.52317	0.062399	0.129587	0.00269581	-0.518765	-0.19711	-0.308649	-0.0175967	0.455343	-0.542026	0.000623197	-0.395948	0.0162434	0.104933	-0.136071	1.64584	-0.355706	0.114903	-0.732503	0.732138	-0.413893	0.199086	0.238341	-0.245948	0.0808395	-0.573477	0.0515209	-0.276598	0.341849	-0.141225	-0.296389	0.108873	-0.126777	0.143659
-4.62153	-1.26688	2.02997	-0.00357062	-0.380044	-0.0805701	0.942017	-0.741932	-0.212995	0.140581	0.351953	-0.0530349	0.00466215	-0.725622	-0.124823	-0.251498	-0.520799	0.0623887	0.130584	0.00358992	-0.518423	-0.197364	-0.30784	-0.0176605	0.45586	-0.542402	0.000259325	-0.396179	0.015287	0.105279	-0.136528	1.64598	-0.356383	0.112867	-0.733065	0.736367	-0.413267	0.197382	0.23808	-0.245139	0.0798479	-0.573506	0.0516891	-0.277806	0.339546	-0.141688	-0.296184	0.111545	-0.125519	0.140909
-4.62055	-1.26517	2.03001	-0.00435637	-0.379849	-0.0800037	0.946762	-0.743101	-0.212573	0.141217	0.350655	-0.0511494	0.00896554	-0.725213	-0.126551	-0.251918	-0.51841	0.0623857	0.131589	0.0044648	-0.518079	-0.197624	-0.307035	-0.0177051	0.456372	-0.542777	-0.000111096	-0.396401	0.014316	0.10562	-0.136977	1.64608	-0.357028	0.110822	-0.733629	0.740592	-0.41263	0.195677	0.237832	-0.244335	0.0788557	-0.573544	0.0518598	-0.279015	0.337235	-0.142134	-0.295973	0.114202	-0.124273	0.138154
-4.61956	-1.26345	2.03002	-0.00515749	-0.379642	-0.0794195	0.951488	-0.744279	-0.212161	0.141846	0.349346	-0.0492744	0.0132753	-0.72479	-0.128272	-0.252323	-0.516003	0.0623901	0.1326	0.00532029	-0.517732	-0.19789	-0.306235	-0.0177305	0.456876	-0.543149	-0.000487982	-0.396613	0.0133304	0.105956	-0.137416	1.64616	-0.35764	0.108769	-0.734197	0.744812	-0.411983	0.193971	0.237596	-0.243537	0.0778634	-0.573593	0.0520328	-0.280224	0.334917	-0.142564	-0.295759	0.116843	-0.123039	0.135395
-4.61858	-1.26171	2.02999	-0.00597396	-0.379422	-0.0788172	0.956193	-0.745466	-0.211759	0.142469	0.348027	-0.0474103	0.0175909	-0.724355	-0.129985	-0.252714	-0.513577	0.0624019	0.133618	0.00615624	-0.517382	-0.198162	-0.30544	-0.0177368	0.457374	-0.543519	-0.000871247	-0.396815	0.0123303	0.106288	-0.137847	1.64621	-0.358219	0.106709	-0.734766	0.749028	-0.411326	0.192263	0.237373	-0.242744	0.076871	-0.573651	0.0522082	-0.281434	0.332592	-0.142977	-0.295539	0.119469	-0.121816	0.132632
-4.6176	-1.25996	2.02992	-0.00680575	-0.37919	-0.0781969	0.960878	-0.746663	-0.211368	0.143085	0.346698	-0.0455572	0.0219122	-0.723908	-0.131691	-0.253091	-0.511134	0.0624214	0.134642	0.00697252	-0.51703	-0.19844	-0.30465	-0.0177238	0.457866	-0.543887	-0.00126081	-0.397007	0.0113159	0.106614	-0.138269	1.64624	-0.358765	0.104642	-0.735339	0.753238	-0.410659	0.190554	0.237163	-0.241956	0.0758788	-0.573718	0.0523859	-0.282643	0.330259	-0.143373	-0.295315	0.122079	-0.120605	0.129865
-4.61661	-1.25819	2.02982	-0.00765284	-0.378946	-0.0775583	0.965543	-0.747868	-0.210988	0.143695	0.345359	-0.0437154	0.0262387	-0.723447	-0.133387	-0.253453	-0.508672	0.0624484	0.135673	0.00776897	-0.516676	-0.198724	-0.303866	-0.0176916	0.458351	-0.544252	-0.00165658	-0.39719	0.0102874	0.106936	-0.138681	1.64624	-0.359279	0.102567	-0.735913	0.757443	-0.409982	0.188844	0.236965	-0.241172	0.0748871	-0.573796	0.0525657	-0.283853	0.32792	-0.143753	-0.295085	0.124672	-0.119406	0.127095
-4.61563	-1.25641	2.02967	-0.00851521	-0.37869	-0.0769014	0.970186	-0.749083	-0.210618	0.144299	0.344011	-0.0418851	0.0305701	-0.722974	-0.135075	-0.253802	-0.506193	0.0624832	0.13671	0.00854547	-0.516318	-0.199014	-0.303087	-0.0176402	0.458829	-0.544614	-0.00205847	-0.397363	0.00924493	0.107253	-0.139085	1.64622	-0.359761	0.100486	-0.736489	0.761642	-0.409294	0.187133	0.236779	-0.240394	0.073896	-0.573883	0.0527476	-0.285062	0.325574	-0.144116	-0.294851	0.127249	-0.11822	0.124321
-4.61465	-1.25462	2.02949	-0.00939283	-0.378422	-0.076226	0.974807	-0.750306	-0.210258	0.144895	0.342652	-0.0400666	0.0349059	-0.722488	-0.136755	-0.254137	-0.503696	0.0625258	0.137753	0.00930186	-0.515958	-0.19931	-0.302313	-0.0175694	0.459302	-0.544974	-0.0024664	-0.397528	0.00818859	0.107565	-0.13948	1.64617	-0.36021	0.0983977	-0.737068	0.765834	-0.408597	0.18542	0.236606	-0.239621	0.0729058	-0.57398	0.0529315	-0.286271	0.323222	-0.144462	-0.294612	0.12981	-0.117045	0.121544
-4.61367	-1.25281	2.02927	-0.0102857	-0.378142	-0.0755321	0.979407	-0.751539	-0.209909	0.145485	0.341284	-0.03826	0.0392458	-0.72199	-0.138425	-0.254458	-0.501183	0.0625763	0.138802	0.010038	-0.515594	-0.199611	-0.301545	-0.0174794	0.459768	-0.545331	-0.0028803	-0.397683	0.00711857	0.107872	-0.139865	1.64609	-0.360626	0.0963032	-0.737648	0.770021	-0.40789	0.183707	0.236445	-0.238853	0.0719167	-0.574087	0.0531173	-0.28748	0.320864	-0.144791	-0.294367	0.132353	-0.115883	0.118764
-4.61268	-1.25099	2.02901	-0.0111937	-0.37785	-0.0748194	0.983984	-0.75278	-0.20957	0.146068	0.339907	-0.0364656	0.0435895	-0.721479	-0.140086	-0.254765	-0.498652	0.0626348	0.139857	0.0107538	-0.515228	-0.199918	-0.300783	-0.01737	0.460228	-0.545686	-0.00330006	-0.397829	0.00603502	0.108174	-0.140242	1.64599	-0.361011	0.0942026	-0.73823	0.7742	-0.407172	0.181992	0.236296	-0.238089	0.0709289	-0.574204	0.053305	-0.288688	0.318499	-0.145103	-0.294118	0.134879	-0.114734	0.115981
-4.6117	-1.24915	2.02871	-0.0121169	-0.377546	-0.0740879	0.988538	-0.75403	-0.209241	0.146644	0.33852	-0.0346837	0.0479366	-0.720957	-0.141738	-0.255059	-0.496105	0.0627013	0.140919	0.0114491	-0.514858	-0.200231	-0.300027	-0.0172412	0.460681	-0.546037	-0.00372561	-0.397967	0.00493811	0.108471	-0.140609	1.64586	-0.361363	0.0920961	-0.738814	0.778373	-0.406446	0.180276	0.23616	-0.23733	0.0699426	-0.57433	0.0534944	-0.289896	0.31613	-0.145397	-0.293863	0.137388	-0.113597	0.113196
-4.61072	-1.24731	2.02837	-0.0130552	-0.377229	-0.0733375	0.993069	-0.755288	-0.208922	0.147214	0.337123	-0.0329144	0.0522867	-0.720422	-0.14338	-0.255339	-0.493541	0.0627759	0.141985	0.0121238	-0.514486	-0.20055	-0.299277	-0.0170931	0.461129	-0.546386	-0.00415686	-0.398095	0.00382798	0.108763	-0.140967	1.64571	-0.361683	0.0899839	-0.739399	0.782538	-0.405709	0.17856	0.236036	-0.236575	0.0689581	-0.574467	0.0536855	-0.291102	0.313755	-0.145674	-0.293603	0.139879	-0.112473	0.110409
-4.60973	-1.24545	2.02799	-0.0140086	-0.376901	-0.0725682	0.997577	-0.756555	-0.208613	0.147776	0.335717	-0.0311581	0.0566394	-0.719875	-0.145012	-0.255606	-0.490961	0.0628588	0.143058	0.0127777	-0.51411	-0.200874	-0.298533	-0.0169256	0.461571	-0.546731	-0.00459373	-0.398216	0.00270481	0.109049	-0.141316	1.64553	-0.361972	0.0878664	-0.739986	0.786695	-0.404963	0.176843	0.235924	-0.235825	0.0679756	-0.574613	0.0538782	-0.292307	0.311375	-0.145934	-0.293338	0.142352	-0.111362	0.10762
-4.60875	-1.24358	2.02758	-0.014977	-0.37656	-0.0717797	1.00206	-0.757831	-0.208315	0.148331	0.334301	-0.0294148	0.0609944	-0.719316	-0.146634	-0.25586	-0.488365	0.0629499	0.144136	0.0134108	-0.51373	-0.201204	-0.297796	-0.0167387	0.462007	-0.547074	-0.00503614	-0.398327	0.00156875	0.109331	-0.141656	1.64533	-0.362228	0.0857437	-0.740574	0.790845	-0.404208	0.175124	0.235824	-0.23508	0.0669953	-0.574769	0.0540724	-0.293511	0.30899	-0.146176	-0.293067	0.144806	-0.110264	0.104829
-4.60777	-1.24169	2.02712	-0.0159605	-0.376207	-0.070972	1.00652	-0.759115	-0.208026	0.148878	0.332876	-0.0276849	0.0653513	-0.718745	-0.148245	-0.2561	-0.485753	0.0630493	0.145219	0.0140228	-0.513347	-0.20154	-0.297066	-0.0165325	0.462437	-0.547413	-0.005484	-0.398431	0.000419979	0.109607	-0.141987	1.6451	-0.362453	0.0836161	-0.741163	0.794986	-0.403443	0.173405	0.235736	-0.234339	0.0660173	-0.574935	0.054268	-0.294714	0.3066	-0.1464	-0.292791	0.147242	-0.109179	0.102037
-4.60678	-1.23979	2.02663	-0.0169589	-0.375843	-0.070145	1.01095	-0.760408	-0.207747	0.149419	0.331442	-0.0259685	0.0697097	-0.718162	-0.149846	-0.256328	-0.483125	0.0631572	0.146307	0.0146138	-0.512961	-0.201881	-0.296342	-0.0163068	0.462861	-0.547749	-0.00593723	-0.398526	-0.000741346	0.109879	-0.142308	1.64485	-0.362646	0.0814838	-0.741753	0.799118	-0.402669	0.171686	0.235659	-0.233602	0.065042	-0.575111	0.0544649	-0.295915	0.304206	-0.146606	-0.292509	0.14966	-0.108107	0.0992431
-4.6058	-1.23788	2.0261	-0.0179722	-0.375466	-0.0692986	1.01536	-0.761708	-0.207479	0.149952	0.329999	-0.0242659	0.0740693	-0.717568	-0.151436	-0.256542	-0.480483	0.0632735	0.147401	0.0151836	-0.51257	-0.202227	-0.295625	-0.0160618	0.46328	-0.548082	-0.00639575	-0.398614	-0.00191505	0.110144	-0.142621	1.64457	-0.362807	0.0793471	-0.742345	0.803241	-0.401886	0.169965	0.235595	-0.232869	0.0640696	-0.575297	0.0546631	-0.297114	0.301808	-0.146794	-0.292221	0.152059	-0.107049	0.0964486
-4.60482	-1.23596	2.02553	-0.0190005	-0.375078	-0.0684328	1.01975	-0.763017	-0.20722	0.150478	0.328546	-0.0225774	0.0784297	-0.716962	-0.153014	-0.256744	-0.477825	0.0633983	0.148499	0.015732	-0.512177	-0.202579	-0.294915	-0.0157974	0.463693	-0.548411	-0.00685947	-0.398694	-0.00310098	0.110405	-0.142924	1.64427	-0.362938	0.0772063	-0.742937	0.807355	-0.401093	0.168244	0.235543	-0.232141	0.0631002	-0.575493	0.0548625	-0.298312	0.299407	-0.146964	-0.291928	0.154438	-0.106004	0.0936533
-4.60383	-1.23402	2.02491	-0.0200435	-0.374678	-0.0675474	1.02411	-0.764335	-0.206971	0.150996	0.327085	-0.020903	0.0827905	-0.716344	-0.154582	-0.256933	-0.475152	0.0635318	0.149602	0.016259	-0.511779	-0.202936	-0.294213	-0.0155136	0.4641	-0.548737	-0.00732832	-0.398765	-0.00429894	0.11066	-0.143218	1.64394	-0.363036	0.0750616	-0.743529	0.811459	-0.400292	0.166522	0.235502	-0.231416	0.0621341	-0.575698	0.0550629	-0.299507	0.297001	-0.147117	-0.291629	0.156798	-0.104973	0.0908576
-4.60285	-1.23207	2.02426	-0.0211013	-0.374265	-0.0666424	1.02844	-0.76566	-0.206731	0.151507	0.325615	-0.019243	0.0871514	-0.715716	-0.156138	-0.25711	-0.472464	0.0636738	0.15071	0.0167644	-0.511377	-0.203298	-0.293518	-0.0152105	0.464502	-0.549059	-0.0078022	-0.39883	-0.00550877	0.11091	-0.143502	1.64359	-0.363104	0.0729132	-0.744122	0.815554	-0.399482	0.1648	0.235473	-0.230696	0.0611714	-0.575914	0.0552644	-0.3007	0.294593	-0.147251	-0.291324	0.159138	-0.103956	0.0880616
-4.60187	-1.23011	2.02357	-0.0221739	-0.373841	-0.0657177	1.03274	-0.766993	-0.206502	0.15201	0.324135	-0.0175977	0.091512	-0.715076	-0.157682	-0.257274	-0.469762	0.0638246	0.151823	0.0172482	-0.510972	-0.203665	-0.29283	-0.014888	0.464899	-0.549378	-0.00828105	-0.398887	-0.0067303	0.111154	-0.143778	1.64322	-0.363141	0.0707615	-0.744716	0.819638	-0.398663	0.163077	0.235456	-0.229979	0.0602125	-0.576139	0.0554667	-0.301891	0.292181	-0.147366	-0.291013	0.161459	-0.102952	0.0852656
-4.60089	-1.22814	2.02285	-0.0232611	-0.373405	-0.0647731	1.03702	-0.768334	-0.206282	0.152506	0.322647	-0.0159673	0.0958719	-0.714424	-0.159215	-0.257426	-0.467046	0.0639841	0.15294	0.0177103	-0.510562	-0.204038	-0.29215	-0.0145461	0.465291	-0.549693	-0.00876477	-0.398937	-0.00796334	0.111393	-0.144044	1.64282	-0.363147	0.0686065	-0.74531	0.823711	-0.397835	0.161354	0.23545	-0.229267	0.0592575	-0.576374	0.0556698	-0.30308	0.289766	-0.147463	-0.290696	0.163759	-0.101963	0.0824699
-4.5999	-1.22616	2.02208	-0.024363	-0.372958	-0.0638088	1.04127	-0.769683	-0.206072	0.152993	0.32115	-0.0143519	0.100231	-0.713762	-0.160735	-0.257566	-0.464315	0.0641525	0.154062	0.0181505	-0.510149	-0.204415	-0.291478	-0.0141849	0.465677	-0.550004	-0.0092533	-0.398979	-0.00920773	0.111627	-0.1443	1.6424	-0.363122	0.0664487	-0.745904	0.827774	-0.396999	0.15963	0.235455	-0.228558	0.0583066	-0.576619	0.0558737	-0.304265	0.287349	-0.147542	-0.290373	0.166039	-0.100987	0.0796746
-4.59892	-1.22416	2.02127	-0.0254794	-0.372498	-0.0628245	1.0455	-0.77104	-0.205871	0.153473	0.319644	-0.0127518	0.104588	-0.713089	-0.162243	-0.257693	-0.461571	0.0643296	0.155187	0.0185689	-0.509731	-0.204798	-0.290814	-0.0138044	0.466058	-0.550312	-0.00974654	-0.399015	-0.0104633	0.111855	-0.144548	1.64195	-0.363066	0.0642882	-0.746498	0.831825	-0.396154	0.157906	0.235472	-0.227852	0.0573601	-0.576874	0.0560783	-0.305448	0.28493	-0.147603	-0.290045	0.168299	-0.100026	0.07688
-4.59794	-1.22216	2.02042	-0.0266104	-0.372027	-0.0618203	1.04969	-0.772404	-0.20568	0.153946	0.31813	-0.0111672	0.108944	-0.712405	-0.163738	-0.257809	-0.458814	0.0645157	0.156317	0.0189652	-0.509309	-0.205185	-0.290158	-0.0134046	0.466435	-0.550615	-0.0102444	-0.399044	-0.0117298	0.112078	-0.144786	1.64148	-0.36298	0.0621254	-0.747092	0.835865	-0.395301	0.156181	0.2355	-0.227151	0.0564181	-0.577139	0.0562833	-0.306628	0.282508	-0.147644	-0.28971	0.170538	-0.0990791	0.0740864
-4.59695	-1.22014	2.01954	-0.0277557	-0.371545	-0.060796	1.05386	-0.773776	-0.205499	0.15441	0.316607	-0.00959822	0.113297	-0.71171	-0.165221	-0.257914	-0.456043	0.0647107	0.15745	0.0193394	-0.508882	-0.205578	-0.28951	-0.0129856	0.466806	-0.550915	-0.0107469	-0.399066	-0.0130071	0.112295	-0.145015	1.64099	-0.362864	0.0599604	-0.747686	0.839893	-0.39444	0.154457	0.23554	-0.226453	0.0554809	-0.577414	0.0564889	-0.307804	0.280085	-0.147667	-0.289368	0.172756	-0.0981466	0.071294
-4.59597	-1.21811	2.01861	-0.0289155	-0.371051	-0.0597516	1.058	-0.775155	-0.205326	0.154866	0.315076	-0.00804515	0.117648	-0.711004	-0.16669	-0.258006	-0.453259	0.0649147	0.158588	0.0196914	-0.508451	-0.205975	-0.288871	-0.0125473	0.467173	-0.55121	-0.0112538	-0.399082	-0.0142951	0.112506	-0.145235	1.64047	-0.362717	0.0577935	-0.74828	0.843908	-0.39357	0.152731	0.23559	-0.225758	0.0545486	-0.577699	0.0566948	-0.308977	0.27766	-0.147671	-0.289021	0.174952	-0.0972286	0.0685031
-4.59499	-1.21607	2.01765	-0.0300896	-0.370545	-0.0586871	1.06211	-0.776542	-0.205164	0.155314	0.313536	-0.00650817	0.121997	-0.710288	-0.168147	-0.258087	-0.450463	0.0651277	0.159729	0.0200211	-0.508016	-0.206377	-0.28824	-0.0120897	0.467535	-0.551502	-0.0117651	-0.399091	-0.0155935	0.112712	-0.145445	1.63993	-0.362541	0.0556249	-0.748873	0.847911	-0.392693	0.151006	0.235652	-0.225067	0.0536215	-0.577993	0.0569011	-0.310147	0.275234	-0.147656	-0.288667	0.177128	-0.0963253	0.0657138
-4.594	-1.21401	2.01664	-0.0312779	-0.370028	-0.0576024	1.06619	-0.777936	-0.20501	0.155755	0.311988	-0.00498748	0.126342	-0.709561	-0.16959	-0.258157	-0.447653	0.0653498	0.160873	0.0203285	-0.507576	-0.206783	-0.287618	-0.011613	0.467893	-0.551789	-0.0122807	-0.399095	-0.0169021	0.112912	-0.145646	1.63937	-0.362334	0.053455	-0.749466	0.851902	-0.391808	0.149281	0.235725	-0.224379	0.0526997	-0.578297	0.0571075	-0.311313	0.272806	-0.147623	-0.288307	0.179282	-0.0954368	0.0629264
-4.59302	-1.21195	2.0156	-0.0324805	-0.369499	-0.0564975	1.07024	-0.779337	-0.204866	0.156187	0.310432	-0.00348327	0.130683	-0.708824	-0.171019	-0.258215	-0.444832	0.065581	0.162021	0.0206135	-0.507132	-0.207194	-0.287005	-0.0111172	0.468246	-0.552072	-0.0128006	-0.399092	-0.0182208	0.113107	-0.145838	1.63879	-0.362098	0.051284	-0.750058	0.855879	-0.390914	0.147555	0.235808	-0.223694	0.0517835	-0.578612	0.057314	-0.312475	0.270378	-0.14757	-0.287941	0.181414	-0.094563	0.0601411
-4.59204	-1.20988	2.01452	-0.0336971	-0.36896	-0.0553723	1.07426	-0.780746	-0.204732	0.156611	0.308867	-0.00199574	0.135021	-0.708077	-0.172435	-0.258262	-0.441998	0.0658213	0.163173	0.020876	-0.506683	-0.207609	-0.2864	-0.0106022	0.468594	-0.55235	-0.0133247	-0.399083	-0.0195494	0.113296	-0.146021	1.63818	-0.361833	0.0491121	-0.750649	0.859842	-0.390014	0.145829	0.235902	-0.223013	0.0508731	-0.578936	0.0575206	-0.313633	0.26795	-0.147499	-0.287568	0.183524	-0.0937043	0.0573583
-4.59106	-1.20779	2.0134	-0.0349278	-0.368408	-0.0542267	1.07825	-0.782161	-0.204606	0.157027	0.307295	-0.000525084	0.139354	-0.707319	-0.173837	-0.258299	-0.439152	0.0660707	0.164327	0.021116	-0.506229	-0.208029	-0.285805	-0.0100682	0.468939	-0.552624	-0.0138528	-0.399069	-0.0208876	0.113479	-0.146195	1.63754	-0.361538	0.0469396	-0.751239	0.863792	-0.389105	0.144104	0.236007	-0.222335	0.0499687	-0.57927	0.0577272	-0.314787	0.265521	-0.147408	-0.287188	0.185612	-0.0928605	0.054578
-4.59007	-1.2057	2.01224	-0.0361725	-0.367846	-0.0530608	1.08221	-0.783583	-0.20449	0.157434	0.305714	0.000928514	0.143682	-0.706552	-0.175224	-0.258325	-0.436295	0.0663293	0.165484	0.0213333	-0.50577	-0.208453	-0.285219	-0.00951513	0.469279	-0.552894	-0.014385	-0.399049	-0.0222354	0.113657	-0.146359	1.63689	-0.361213	0.0447667	-0.751828	0.867727	-0.388189	0.142378	0.236123	-0.221659	0.0490705	-0.579613	0.0579335	-0.315937	0.263092	-0.147298	-0.286802	0.187677	-0.0920319	0.0518007
-4.58909	-1.20359	2.01104	-0.037431	-0.367273	-0.0518745	1.08614	-0.785012	-0.204383	0.157833	0.304125	0.00236486	0.148006	-0.705774	-0.176598	-0.25834	-0.433427	0.0665971	0.166645	0.021528	-0.505306	-0.208882	-0.284642	-0.00894306	0.469615	-0.553159	-0.0149212	-0.399024	-0.0235925	0.113829	-0.146514	1.63621	-0.36086	0.0425937	-0.752416	0.871648	-0.387266	0.140652	0.236249	-0.220987	0.0481786	-0.579967	0.0581397	-0.317082	0.260663	-0.147168	-0.28641	0.18972	-0.0912186	0.0490264
-4.58811	-1.20148	2.0098	-0.0387034	-0.366688	-0.0506678	1.09004	-0.786448	-0.204285	0.158224	0.302529	0.00378377	0.152324	-0.704987	-0.177957	-0.258344	-0.430547	0.0668742	0.167808	0.0217	-0.504838	-0.209314	-0.284075	-0.00835206	0.469948	-0.55342	-0.0154611	-0.398993	-0.0249586	0.113995	-0.14666	1.63551	-0.360478	0.0404208	-0.753003	0.875554	-0.386336	0.138927	0.236385	-0.220318	0.0472933	-0.58033	0.0583455	-0.318223	0.258235	-0.14702	-0.286011	0.191741	-0.0904206	0.0462554
-4.58712	-1.19935	2.00852	-0.0399895	-0.366093	-0.0494407	1.0939	-0.78789	-0.204196	0.158607	0.300925	0.00518505	0.156636	-0.704189	-0.179301	-0.258338	-0.427656	0.0671605	0.168973	0.0218491	-0.504364	-0.20975	-0.283518	-0.00774215	0.470276	-0.553675	-0.0160049	-0.398958	-0.0263337	0.114155	-0.146796	1.63479	-0.360067	0.0382484	-0.753588	0.879445	-0.385398	0.137201	0.236532	-0.219651	0.0464148	-0.580703	0.0585509	-0.319359	0.255808	-0.146852	-0.285605	0.193738	-0.089638	0.043488
-4.58614	-1.19722	2.00721	-0.0412893	-0.365486	-0.0481931	1.09773	-0.789339	-0.204117	0.158981	0.299313	0.00656852	0.160943	-0.703383	-0.18063	-0.258322	-0.424755	0.067456	0.170141	0.0219755	-0.503886	-0.210191	-0.28297	-0.00711339	0.470601	-0.553926	-0.0165525	-0.398917	-0.0277175	0.11431	-0.146924	1.63405	-0.359628	0.0360766	-0.754172	0.883321	-0.384454	0.135476	0.236689	-0.218987	0.0455432	-0.581086	0.0587558	-0.320489	0.253381	-0.146665	-0.285192	0.195713	-0.088871	0.0407244
-4.58516	-1.19507	2.00585	-0.0426027	-0.364869	-0.046925	1.10154	-0.790794	-0.204046	0.159346	0.297693	0.00793401	0.165242	-0.702566	-0.181944	-0.258296	-0.421843	0.0677609	0.171312	0.0220789	-0.503402	-0.210635	-0.282433	-0.00646583	0.470922	-0.554173	-0.0171036	-0.398872	-0.0291099	0.114459	-0.147042	1.63328	-0.35916	0.0339057	-0.754753	0.887181	-0.383502	0.13375	0.236856	-0.218326	0.0446788	-0.581479	0.0589601	-0.321615	0.250956	-0.146458	-0.284773	0.197664	-0.0881195	0.0379649
-4.58417	-1.19292	2.00446	-0.0439296	-0.364241	-0.0456364	1.1053	-0.792256	-0.203984	0.159703	0.296066	0.00928133	0.169535	-0.70174	-0.183244	-0.25826	-0.418921	0.068075	0.172484	0.0221594	-0.502913	-0.211083	-0.281905	-0.00579953	0.471239	-0.554414	-0.0176584	-0.398822	-0.0305106	0.114602	-0.147151	1.63249	-0.358664	0.031736	-0.755333	0.891025	-0.382544	0.132025	0.237033	-0.217668	0.0438217	-0.581881	0.0591637	-0.322735	0.248532	-0.146232	-0.284347	0.199592	-0.0873838	0.0352095
-4.58319	-1.19075	2.00302	-0.0452698	-0.363602	-0.0443273	1.10904	-0.793724	-0.203932	0.160051	0.294431	0.0106103	0.173821	-0.700905	-0.184527	-0.258214	-0.415989	0.0683985	0.173659	0.022217	-0.502419	-0.211535	-0.281388	-0.00511455	0.471553	-0.554651	-0.0182166	-0.398768	-0.0319194	0.114739	-0.147252	1.63168	-0.358141	0.0295677	-0.755912	0.894852	-0.38158	0.130301	0.23722	-0.217012	0.0429721	-0.582294	0.0593666	-0.32385	0.24611	-0.145986	-0.283914	0.201496	-0.0866639	0.0324587
-4.58221	-1.18858	2.00155	-0.0466234	-0.362953	-0.0429977	1.11274	-0.795198	-0.203888	0.160391	0.292789	0.0119208	0.1781	-0.70006	-0.185795	-0.258158	-0.413047	0.0687312	0.174835	0.0222515	-0.501919	-0.21199	-0.280881	-0.00441094	0.471864	-0.554882	-0.0187783	-0.398709	-0.0333362	0.114871	-0.147343	1.63085	-0.357589	0.027401	-0.756487	0.898662	-0.380609	0.128576	0.237417	-0.216358	0.0421303	-0.582715	0.0595686	-0.32496	0.24369	-0.14572	-0.283474	0.203376	-0.0859598	0.0297126
-4.58122	-1.18639	2.00004	-0.0479902	-0.362294	-0.0416476	1.11641	-0.796677	-0.203853	0.160722	0.29114	0.0132125	0.18237	-0.699207	-0.187048	-0.258093	-0.410096	0.0690733	0.176014	0.0222631	-0.501414	-0.212449	-0.280384	-0.00368877	0.472172	-0.555109	-0.0193434	-0.398647	-0.0347606	0.114997	-0.147425	1.62999	-0.35701	0.0252363	-0.757061	0.902456	-0.379631	0.126852	0.237624	-0.215707	0.0412964	-0.583147	0.0597697	-0.326063	0.241272	-0.145435	-0.283028	0.205233	-0.0852717	0.0269715
-4.58024	-1.1842	1.99849	-0.0493702	-0.361623	-0.040277	1.12005	-0.798163	-0.203827	0.161044	0.289484	0.0144854	0.186633	-0.698344	-0.188284	-0.258019	-0.407135	0.0694247	0.177194	0.0222515	-0.500904	-0.212911	-0.279898	-0.00294809	0.472477	-0.55533	-0.0199118	-0.39858	-0.0361927	0.115117	-0.147498	1.62912	-0.356404	0.0230738	-0.757633	0.906232	-0.378648	0.125129	0.23784	-0.215058	0.0404705	-0.583588	0.0599698	-0.327161	0.238857	-0.145131	-0.282574	0.207065	-0.0845997	0.0242355
-4.57926	-1.182	1.99691	-0.0507632	-0.360943	-0.0388859	1.12365	-0.799655	-0.203809	0.161358	0.28782	0.0157393	0.190887	-0.697472	-0.189504	-0.257936	-0.404166	0.0697854	0.178375	0.0222169	-0.500388	-0.213376	-0.279423	-0.00218898	0.472778	-0.555546	-0.0204834	-0.398509	-0.0376321	0.115231	-0.147562	1.62822	-0.355771	0.0209136	-0.758202	0.90999	-0.377658	0.123406	0.238066	-0.214412	0.0396529	-0.584039	0.0601687	-0.328252	0.236444	-0.144806	-0.282114	0.208874	-0.0839438	0.021505
-4.57828	-1.17979	1.99528	-0.0521691	-0.360252	-0.0374742	1.12721	-0.801152	-0.203801	0.161663	0.286149	0.016974	0.195132	-0.696592	-0.190709	-0.257843	-0.401187	0.0701554	0.179558	0.0221592	-0.499867	-0.213844	-0.278958	-0.0014115	0.473077	-0.555757	-0.0210581	-0.398435	-0.0390786	0.115339	-0.147617	1.6273	-0.35511	0.0187562	-0.758768	0.913731	-0.376663	0.121683	0.238301	-0.213768	0.0388438	-0.5845	0.0603665	-0.329337	0.234035	-0.144462	-0.281646	0.210657	-0.0833042	0.01878
-4.57729	-1.17758	1.99362	-0.0535879	-0.359552	-0.0360421	1.13075	-0.802655	-0.203801	0.161959	0.284471	0.0181893	0.199368	-0.695702	-0.191896	-0.257742	-0.3982	0.0705348	0.180742	0.0220783	-0.49934	-0.214316	-0.278505	-0.000615728	0.473373	-0.555962	-0.021636	-0.398358	-0.040532	0.115442	-0.147664	1.62636	-0.354423	0.0166017	-0.759331	0.917453	-0.375662	0.119961	0.238545	-0.213126	0.0380432	-0.58497	0.0605629	-0.330416	0.231628	-0.144098	-0.281172	0.212417	-0.0826808	0.0160609
-4.57631	-1.17535	1.99192	-0.0550195	-0.358841	-0.0345894	1.13424	-0.804163	-0.20381	0.162246	0.282787	0.0193851	0.203594	-0.694804	-0.193068	-0.257632	-0.395205	0.0709234	0.181926	0.0219743	-0.498807	-0.21479	-0.278062	0.000198273	0.473667	-0.556163	-0.0222169	-0.398277	-0.0419922	0.115538	-0.147701	1.6254	-0.35371	0.0144503	-0.759892	0.921156	-0.374655	0.118239	0.238798	-0.212486	0.0372515	-0.58545	0.060758	-0.331488	0.229225	-0.143714	-0.280691	0.214151	-0.0820738	0.013348
-4.57533	-1.17312	1.99018	-0.0564637	-0.35812	-0.0331163	1.13771	-0.805676	-0.203828	0.162524	0.281095	0.0205612	0.20781	-0.693898	-0.194222	-0.257513	-0.392202	0.0713213	0.183112	0.0218472	-0.498269	-0.215267	-0.277631	0.00103042	0.473958	-0.556357	-0.0228008	-0.398193	-0.0434589	0.115629	-0.147729	1.62442	-0.35297	0.0123024	-0.76045	0.924841	-0.373643	0.116518	0.239061	-0.211848	0.0364688	-0.585939	0.0609517	-0.332554	0.226826	-0.143311	-0.280202	0.215861	-0.0814833	0.0106413
-4.57434	-1.17087	1.9884	-0.0579205	-0.35739	-0.0316228	1.14113	-0.807195	-0.203854	0.162794	0.279397	0.0217174	0.212016	-0.692982	-0.19536	-0.257386	-0.389191	0.0717286	0.184299	0.0216969	-0.497725	-0.215747	-0.277211	0.00188065	0.474247	-0.556547	-0.0233876	-0.398106	-0.044932	0.115714	-0.147749	1.62342	-0.352204	0.0101582	-0.761004	0.928506	-0.372625	0.114797	0.239332	-0.211212	0.0356952	-0.586438	0.0611438	-0.333613	0.224431	-0.142887	-0.279707	0.217546	-0.0809093	0.00794112
-4.57336	-1.16862	1.98658	-0.0593897	-0.35665	-0.0301088	1.14452	-0.808719	-0.203889	0.163054	0.277693	0.0228537	0.216212	-0.692059	-0.19648	-0.257251	-0.386172	0.0721451	0.185486	0.0215234	-0.497175	-0.21623	-0.276803	0.00274887	0.474534	-0.556731	-0.0239772	-0.398016	-0.0464111	0.115794	-0.14776	1.62239	-0.351412	0.00801791	-0.761556	0.932151	-0.371602	0.113077	0.239613	-0.210578	0.0349309	-0.586946	0.0613342	-0.334664	0.22204	-0.142444	-0.279204	0.219206	-0.0803518	0.00524771
-4.57238	-1.16637	1.98473	-0.0608713	-0.3559	-0.0285745	1.14788	-0.810248	-0.203933	0.163306	0.275981	0.0239699	0.220397	-0.691127	-0.197584	-0.257107	-0.383146	0.0725709	0.186674	0.0213268	-0.496619	-0.216715	-0.276406	0.003635	0.474818	-0.556909	-0.0245696	-0.397923	-0.0478962	0.115867	-0.147763	1.62135	-0.350594	0.00588179	-0.762104	0.935777	-0.370575	0.111358	0.239902	-0.209946	0.0341761	-0.587464	0.061523	-0.335709	0.219654	-0.141981	-0.278694	0.220841	-0.0798111	0.00256128
-4.57139	-1.1641	1.98284	-0.0623651	-0.355141	-0.0270198	1.1512	-0.811782	-0.203985	0.163548	0.274264	0.0250657	0.22457	-0.690187	-0.19867	-0.256956	-0.380112	0.0730059	0.187862	0.021107	-0.496057	-0.217203	-0.276021	0.00453896	0.475101	-0.557081	-0.0251647	-0.397828	-0.049387	0.115935	-0.147756	1.62028	-0.349751	0.0037501	-0.762648	0.939382	-0.369542	0.10964	0.240199	-0.209316	0.033431	-0.587992	0.0617099	-0.336746	0.217272	-0.141498	-0.278178	0.22245	-0.0792871	-0.000117971
-4.57041	-1.16183	1.98091	-0.063871	-0.354372	-0.0254447	1.15448	-0.81332	-0.204046	0.163781	0.272539	0.0261411	0.228732	-0.689239	-0.199739	-0.256797	-0.377072	0.0734501	0.189051	0.020864	-0.49549	-0.217692	-0.275648	0.00546067	0.475381	-0.557248	-0.0257625	-0.397731	-0.0508833	0.115996	-0.147741	1.6192	-0.348883	0.00162309	-0.763189	0.942967	-0.368504	0.107922	0.240505	-0.208687	0.0326956	-0.588529	0.061895	-0.337775	0.214895	-0.140994	-0.277654	0.224034	-0.07878	-0.00278981
-4.56943	-1.15955	1.97895	-0.0653889	-0.353594	-0.0238494	1.15773	-0.814863	-0.204115	0.164006	0.270809	0.0271959	0.232882	-0.688283	-0.20079	-0.256631	-0.374025	0.0739035	0.190239	0.0205979	-0.494917	-0.218184	-0.275287	0.00640004	0.47566	-0.557409	-0.0263629	-0.397631	-0.0523848	0.116052	-0.147718	1.61809	-0.34799	-0.000499008	-0.763726	0.946531	-0.367462	0.106205	0.24082	-0.20806	0.0319703	-0.589075	0.0620781	-0.338797	0.212524	-0.140471	-0.277123	0.225592	-0.0782897	-0.00545403
-4.56845	-1.15726	1.97694	-0.0669187	-0.352807	-0.0222338	1.16093	-0.816411	-0.204193	0.164221	0.269072	0.02823	0.23702	-0.687319	-0.201824	-0.256457	-0.370972	0.0743661	0.191427	0.0203086	-0.494337	-0.218678	-0.274938	0.00735698	0.475938	-0.557564	-0.0269659	-0.39753	-0.0538915	0.116103	-0.147686	1.61696	-0.347072	-0.00261593	-0.764259	0.950074	-0.366416	0.104489	0.241143	-0.207435	0.0312551	-0.589631	0.0622591	-0.339811	0.210157	-0.139929	-0.276585	0.227125	-0.0778164	-0.0081104
-4.56746	-1.15497	1.97491	-0.0684604	-0.352011	-0.0205981	1.16411	-0.817964	-0.204279	0.164427	0.26733	0.0292431	0.241145	-0.686348	-0.20284	-0.256275	-0.367912	0.0748378	0.192615	0.0199963	-0.493752	-0.219174	-0.274601	0.0083314	0.476213	-0.557714	-0.0275713	-0.397426	-0.055403	0.116147	-0.147645	1.61582	-0.34613	-0.00472745	-0.764788	0.953596	-0.365365	0.102774	0.241473	-0.206811	0.0305502	-0.590196	0.0624381	-0.340818	0.207797	-0.139366	-0.276039	0.228632	-0.07736	-0.0107587
-4.56648	-1.15267	1.97283	-0.0700137	-0.351206	-0.0189422	1.16724	-0.81952	-0.204374	0.164624	0.265581	0.0302353	0.245257	-0.685368	-0.203838	-0.256087	-0.364847	0.0753186	0.193803	0.0196609	-0.49316	-0.219672	-0.274276	0.00932321	0.476488	-0.557857	-0.0281791	-0.397321	-0.0569193	0.116185	-0.147596	1.61465	-0.345163	-0.0068333	-0.765313	0.957095	-0.36431	0.10106	0.241812	-0.206189	0.0298558	-0.59077	0.0626148	-0.341816	0.205442	-0.138783	-0.275487	0.230112	-0.0769208	-0.0133988
-4.5655	-1.15036	1.97072	-0.0715785	-0.350393	-0.0172662	1.17034	-0.821081	-0.204477	0.164812	0.263826	0.0312064	0.249356	-0.684381	-0.204817	-0.255892	-0.361775	0.0758085	0.19499	0.0193024	-0.492562	-0.220171	-0.273964	0.0103323	0.476761	-0.557994	-0.0287893	-0.397215	-0.0584399	0.116218	-0.147539	1.61346	-0.344173	-0.00893326	-0.765833	0.960573	-0.363251	0.0993466	0.242159	-0.205568	0.0291719	-0.591354	0.0627892	-0.342805	0.203094	-0.13818	-0.274927	0.231567	-0.0764987	-0.0160303
-4.56451	-1.14805	1.96857	-0.0731548	-0.34957	-0.0155701	1.1734	-0.822646	-0.204588	0.164991	0.262066	0.0321561	0.253442	-0.683387	-0.205779	-0.255689	-0.358698	0.0763075	0.196177	0.0189208	-0.491958	-0.220672	-0.273664	0.0113586	0.477033	-0.558126	-0.0294019	-0.397107	-0.0599649	0.116245	-0.147473	1.61225	-0.343158	-0.0110271	-0.766349	0.964028	-0.362188	0.0976343	0.242513	-0.204949	0.0284989	-0.591947	0.0629612	-0.343787	0.200752	-0.137557	-0.27436	0.232996	-0.0760938	-0.0186532
-4.56353	-1.14573	1.96638	-0.0747424	-0.34874	-0.0138541	1.17642	-0.824215	-0.204708	0.16516	0.2603	0.0330845	0.257513	-0.682385	-0.206722	-0.255481	-0.355616	0.0768154	0.197363	0.0185163	-0.491348	-0.221174	-0.273377	0.012402	0.477305	-0.558251	-0.0300166	-0.396997	-0.0614938	0.116267	-0.147399	1.61103	-0.34212	-0.0131145	-0.766861	0.96746	-0.361121	0.0959229	0.242875	-0.204331	0.0278367	-0.59255	0.0631308	-0.34476	0.198417	-0.136915	-0.273786	0.234398	-0.0757062	-0.0212672
-4.56255	-1.14341	1.96416	-0.0763412	-0.3479	-0.0121181	1.1794	-0.825787	-0.204837	0.165321	0.258528	0.0339913	0.261571	-0.681375	-0.207647	-0.255265	-0.352529	0.0773323	0.198547	0.0180888	-0.490732	-0.221678	-0.273103	0.0134624	0.477575	-0.558371	-0.0306336	-0.396887	-0.0630267	0.116282	-0.147317	1.60978	-0.341059	-0.0151953	-0.767368	0.97087	-0.360051	0.0942126	0.243245	-0.203714	0.0271856	-0.593161	0.0632978	-0.345724	0.196088	-0.136252	-0.273205	0.235775	-0.0753358	-0.0238721
-4.56156	-1.14108	1.9619	-0.077951	-0.347053	-0.0103623	1.18235	-0.827364	-0.204973	0.165472	0.25675	0.0348764	0.265614	-0.680359	-0.208553	-0.255044	-0.349437	0.0778582	0.199731	0.0176383	-0.49011	-0.222183	-0.272842	0.0145397	0.477845	-0.558484	-0.0312528	-0.396776	-0.0645631	0.116292	-0.147226	1.60851	-0.339974	-0.0172692	-0.76787	0.974256	-0.358978	0.0925034	0.243622	-0.203099	0.0265457	-0.593782	0.0634623	-0.346679	0.193767	-0.135569	-0.272617	0.237124	-0.0749829	-0.0264677
-4.56058	-1.13874	1.95961	-0.0795718	-0.346197	-0.00858671	1.18525	-0.828944	-0.205118	0.165614	0.254967	0.0357397	0.269642	-0.679335	-0.20944	-0.254816	-0.34634	0.0783929	0.200913	0.017165	-0.489481	-0.222689	-0.272593	0.0156337	0.478114	-0.55859	-0.031874	-0.396664	-0.0661029	0.116296	-0.147128	1.60723	-0.338867	-0.0193361	-0.768367	0.977618	-0.357901	0.0907953	0.244006	-0.202485	0.0259172	-0.594412	0.063624	-0.347625	0.191453	-0.134867	-0.272022	0.238448	-0.0746473	-0.0290537
-4.5596	-1.1364	1.95728	-0.0812034	-0.345334	-0.00679141	1.18812	-0.830528	-0.205271	0.165746	0.253179	0.0365812	0.273656	-0.678304	-0.210309	-0.254583	-0.343239	0.0789364	0.202094	0.0166689	-0.488846	-0.223196	-0.272358	0.0167445	0.478383	-0.558691	-0.0324974	-0.396551	-0.067646	0.116295	-0.147022	1.60592	-0.337737	-0.0213956	-0.768859	0.980957	-0.356821	0.0890883	0.244397	-0.201872	0.0253001	-0.595051	0.0637829	-0.348562	0.189146	-0.134144	-0.271419	0.239744	-0.0743293	-0.03163
-4.55862	-1.13406	1.95491	-0.0828457	-0.344462	-0.00497648	1.19095	-0.832115	-0.205433	0.16587	0.251385	0.0374006	0.277653	-0.677267	-0.211159	-0.254343	-0.340134	0.0794887	0.203274	0.0161499	-0.488204	-0.223703	-0.272135	0.0178718	0.478651	-0.558785	-0.0331227	-0.396438	-0.069192	0.116288	-0.146907	1.6046	-0.336585	-0.0234475	-0.769346	0.984271	-0.355738	0.0873826	0.244795	-0.20126	0.0246947	-0.595699	0.063939	-0.34949	0.186848	-0.133402	-0.270809	0.241014	-0.0740287	-0.0341964
-4.55763	-1.1317	1.95251	-0.0844986	-0.343583	-0.003142	1.19373	-0.833705	-0.205602	0.165984	0.249586	0.0381978	0.281636	-0.676222	-0.21199	-0.254098	-0.337025	0.0800497	0.204452	0.0156083	-0.487557	-0.224212	-0.271926	0.0190156	0.478919	-0.558873	-0.0337499	-0.396325	-0.0707408	0.116275	-0.146785	1.60326	-0.335411	-0.0254916	-0.769828	0.987561	-0.354653	0.085678	0.2452	-0.200649	0.024101	-0.596356	0.0640922	-0.350409	0.184557	-0.13264	-0.270193	0.242257	-0.0737458	-0.0367527
-4.55665	-1.12935	1.95008	-0.0861618	-0.342696	-0.00128805	1.19648	-0.835298	-0.20578	0.166088	0.247783	0.0389728	0.285602	-0.675171	-0.212802	-0.253847	-0.333912	0.0806194	0.205628	0.015044	-0.486902	-0.224721	-0.271731	0.0201757	0.479187	-0.558955	-0.0343791	-0.396211	-0.0722922	0.116256	-0.146655	1.60189	-0.334215	-0.0275276	-0.770304	0.990826	-0.353565	0.0839746	0.245612	-0.200039	0.0235192	-0.597023	0.0642423	-0.351317	0.182275	-0.131858	-0.269569	0.243474	-0.0734804	-0.0392987
-4.55567	-1.12699	1.94761	-0.0878354	-0.341802	0.000585284	1.19919	-0.836895	-0.205967	0.166184	0.245974	0.0397254	0.289552	-0.674113	-0.213594	-0.253592	-0.330795	0.0811977	0.206802	0.0144571	-0.486242	-0.22523	-0.271549	0.0213521	0.479455	-0.55903	-0.0350102	-0.396098	-0.0738459	0.116232	-0.146517	1.60051	-0.332998	-0.0295554	-0.770775	0.994066	-0.352475	0.0822726	0.246031	-0.19943	0.0229495	-0.597698	0.0643894	-0.352217	0.180001	-0.131056	-0.268938	0.244663	-0.0732327	-0.0418341
-4.55468	-1.12462	1.94511	-0.0895191	-0.3409	0.0024779	1.20186	-0.838494	-0.206161	0.16627	0.24416	0.0404556	0.293485	-0.673048	-0.214368	-0.253331	-0.327675	0.0817845	0.207974	0.0138476	-0.485575	-0.225739	-0.27138	0.0225446	0.479723	-0.559098	-0.035643	-0.395985	-0.0754018	0.116203	-0.146371	1.59911	-0.331759	-0.0315746	-0.77124	0.997281	-0.351382	0.0805718	0.246456	-0.198822	0.0223919	-0.598382	0.0645333	-0.353106	0.177736	-0.130234	-0.2683	0.245826	-0.0730028	-0.0443588
-4.5537	-1.12225	1.94257	-0.0912128	-0.339992	0.00438972	1.20449	-0.840096	-0.206363	0.166347	0.242341	0.0411631	0.297401	-0.671977	-0.215122	-0.253065	-0.324553	0.0823799	0.209143	0.0132157	-0.484901	-0.226249	-0.271225	0.0237532	0.479992	-0.559161	-0.0362777	-0.395872	-0.0769596	0.116167	-0.146218	1.59769	-0.330499	-0.0335851	-0.771699	1.00047	-0.350287	0.0788723	0.246887	-0.198215	0.0218466	-0.599075	0.064674	-0.353985	0.175479	-0.129393	-0.267654	0.246962	-0.0727906	-0.0468726
-4.55272	-1.11988	1.94	-0.0929164	-0.339076	0.00632064	1.20708	-0.841701	-0.206574	0.166414	0.240518	0.041848	0.3013	-0.670899	-0.215856	-0.252794	-0.321427	0.0829836	0.21031	0.0125614	-0.484221	-0.226758	-0.271084	0.0249776	0.480261	-0.559216	-0.036914	-0.395759	-0.0785192	0.116127	-0.146058	1.59625	-0.329219	-0.0355867	-0.772152	1.00363	-0.349191	0.0771743	0.247324	-0.197608	0.0213137	-0.599777	0.0648114	-0.354854	0.173232	-0.128531	-0.267002	0.24807	-0.0725962	-0.0493753
-4.55173	-1.1175	1.93739	-0.0946297	-0.338154	0.00827055	1.20963	-0.843309	-0.206793	0.166472	0.238689	0.0425101	0.305182	-0.669815	-0.216571	-0.252519	-0.318299	0.0835958	0.211475	0.0118848	-0.483535	-0.227268	-0.270957	0.0262178	0.480531	-0.559265	-0.0375521	-0.395647	-0.0800802	0.11608	-0.145889	1.5948	-0.327918	-0.037579	-0.772599	1.00677	-0.348093	0.0754776	0.247768	-0.197003	0.0207933	-0.600488	0.0649454	-0.355713	0.170994	-0.12765	-0.266343	0.249151	-0.0724196	-0.0518668
-4.55075	-1.11512	1.93475	-0.0963527	-0.337225	0.0102394	1.21214	-0.844919	-0.20702	0.166521	0.236857	0.0431492	0.309045	-0.668725	-0.217266	-0.252239	-0.315168	0.0842162	0.212637	0.011186	-0.482842	-0.227777	-0.270844	0.0274736	0.480801	-0.559307	-0.0381917	-0.395536	-0.0816426	0.116029	-0.145714	1.59332	-0.326596	-0.0395619	-0.773039	1.00988	-0.346993	0.0737823	0.248217	-0.196398	0.0202856	-0.601207	0.0650759	-0.356562	0.168766	-0.12675	-0.265677	0.250206	-0.0722608	-0.0543467
-4.54977	-1.11274	1.93207	-0.098085	-0.336289	0.012227	1.21461	-0.846531	-0.207255	0.16656	0.23502	0.0437654	0.312891	-0.667628	-0.217942	-0.251955	-0.312035	0.0848448	0.213796	0.010465	-0.482143	-0.228286	-0.270745	0.028745	0.481072	-0.559343	-0.038833	-0.395426	-0.083206	0.115972	-0.145531	1.59183	-0.325255	-0.0415352	-0.773474	1.01296	-0.345891	0.0720885	0.248673	-0.195794	0.0197906	-0.601936	0.0652029	-0.3574	0.166548	-0.12583	-0.265004	0.251233	-0.07212	-0.0568149
-4.54878	-1.11035	1.92937	-0.0998267	-0.335347	0.0142332	1.21704	-0.848145	-0.207498	0.16659	0.233178	0.0443585	0.316718	-0.666526	-0.218598	-0.251667	-0.3089	0.0854816	0.214952	0.00972195	-0.481437	-0.228794	-0.270659	0.0300317	0.481345	-0.559372	-0.0394759	-0.395317	-0.0847703	0.115909	-0.145341	1.59032	-0.323894	-0.0434986	-0.773902	1.01602	-0.344789	0.0703962	0.249134	-0.195191	0.0193085	-0.602673	0.0653263	-0.358227	0.164339	-0.12489	-0.264323	0.252232	-0.0719972	-0.0592713
-4.5478	-1.10796	1.92663	-0.101578	-0.334398	0.0162581	1.21943	-0.849762	-0.20775	0.16661	0.231333	0.0449285	0.320527	-0.665417	-0.219234	-0.251374	-0.305764	0.0861265	0.216105	0.00895696	-0.480724	-0.229302	-0.270589	0.0313338	0.481618	-0.559394	-0.0401203	-0.395209	-0.0863353	0.115841	-0.145144	1.58879	-0.322513	-0.0454518	-0.774323	1.01905	-0.343685	0.0687054	0.2496	-0.194588	0.0188394	-0.603419	0.0654461	-0.359044	0.162141	-0.12393	-0.263636	0.253205	-0.0718923	-0.0617157
-4.54682	-1.10557	1.92386	-0.103337	-0.333444	0.0183014	1.22178	-0.85138	-0.208009	0.166622	0.229483	0.0454752	0.324317	-0.664303	-0.21985	-0.251078	-0.302626	0.0867793	0.217254	0.00817012	-0.480005	-0.229808	-0.270532	0.032651	0.481892	-0.559409	-0.0407661	-0.395103	-0.0879007	0.115768	-0.144939	1.58724	-0.321114	-0.0473948	-0.774738	1.02205	-0.342581	0.0670162	0.250072	-0.193986	0.0183834	-0.604173	0.0655621	-0.359849	0.159953	-0.122951	-0.262943	0.25415	-0.0718054	-0.0641478
-4.54584	-1.10317	1.92105	-0.105106	-0.332483	0.020363	1.22408	-0.853001	-0.208277	0.166623	0.227629	0.0459985	0.328087	-0.663182	-0.220446	-0.250779	-0.299486	0.0874401	0.218401	0.00736152	-0.479279	-0.230314	-0.27049	0.0339832	0.482168	-0.559418	-0.0414135	-0.394998	-0.0894664	0.11569	-0.144728	1.58567	-0.319695	-0.0493272	-0.775146	1.02502	-0.341476	0.0653285	0.250549	-0.193384	0.0179406	-0.604936	0.0656744	-0.360644	0.157776	-0.121953	-0.262242	0.255068	-0.0717365	-0.0665675
-4.54485	-1.10077	1.91821	-0.106884	-0.331517	0.0224428	1.22635	-0.854623	-0.208552	0.166616	0.225771	0.0464984	0.331839	-0.662056	-0.221022	-0.250476	-0.296345	0.0881087	0.219543	0.00653127	-0.478547	-0.230819	-0.270462	0.0353303	0.482446	-0.55942	-0.0420622	-0.394895	-0.0910321	0.115606	-0.14451	1.58409	-0.318258	-0.0512489	-0.775547	1.02797	-0.34037	0.0636424	0.251032	-0.192783	0.0175111	-0.605708	0.0657827	-0.361427	0.15561	-0.120935	-0.261534	0.255958	-0.0716857	-0.0689747
-4.54387	-1.09837	1.91534	-0.10867	-0.330546	0.0245407	1.22857	-0.856246	-0.208836	0.166599	0.223909	0.0469748	0.33557	-0.660924	-0.221578	-0.25017	-0.293204	0.0887851	0.220682	0.00567948	-0.477809	-0.231322	-0.270449	0.0366922	0.482725	-0.559414	-0.0427123	-0.394793	-0.0925976	0.115517	-0.144285	1.58249	-0.316803	-0.0531596	-0.77594	1.03088	-0.339264	0.061958	0.251519	-0.192183	0.017095	-0.606488	0.0658871	-0.3622	0.153455	-0.119898	-0.26082	0.256821	-0.071653	-0.0713691
-4.54289	-1.09597	1.91244	-0.110464	-0.329568	0.0266565	1.23075	-0.857872	-0.209127	0.166572	0.222043	0.0474276	0.339281	-0.659787	-0.222113	-0.24986	-0.290061	0.0894691	0.221817	0.00480626	-0.477063	-0.231824	-0.270451	0.0380687	0.483005	-0.559402	-0.0433638	-0.394693	-0.0941628	0.115423	-0.144053	1.58087	-0.315329	-0.0550591	-0.776327	1.03377	-0.338157	0.0602752	0.252011	-0.191583	0.0166924	-0.607277	0.0659876	-0.36296	0.151311	-0.118841	-0.260099	0.257656	-0.0716383	-0.0737505
-4.5419	-1.09356	1.90951	-0.112267	-0.328586	0.0287902	1.23289	-0.859498	-0.209427	0.166537	0.220174	0.0478568	0.342972	-0.658643	-0.222629	-0.249548	-0.286919	0.0901607	0.222948	0.00391173	-0.476312	-0.232324	-0.270467	0.0394596	0.483288	-0.559383	-0.0440165	-0.394596	-0.0957273	0.115323	-0.143814	1.57923	-0.313838	-0.0569472	-0.776706	1.03663	-0.337051	0.0585941	0.252508	-0.190983	0.0163033	-0.608074	0.0660839	-0.36371	0.149178	-0.117766	-0.259371	0.258464	-0.0716419	-0.0761188
-4.54092	-1.09115	1.90655	-0.114077	-0.327598	0.0309416	1.23499	-0.861126	-0.209734	0.166492	0.218301	0.0482622	0.346643	-0.657495	-0.223124	-0.249233	-0.283775	0.0908598	0.224074	0.002996	-0.475553	-0.232823	-0.270498	0.040865	0.483573	-0.559357	-0.0446706	-0.394501	-0.0972911	0.115219	-0.143569	1.57757	-0.312329	-0.0588237	-0.777078	1.03946	-0.335945	0.0569147	0.25301	-0.190384	0.015928	-0.608879	0.0661762	-0.364447	0.147058	-0.116671	-0.258637	0.259245	-0.0716635	-0.0784739
-4.53994	-1.08874	1.90355	-0.115896	-0.326606	0.0331104	1.23705	-0.862755	-0.21005	0.166437	0.216425	0.0486438	0.350292	-0.656341	-0.223599	-0.248915	-0.280632	0.0915663	0.225197	0.00205921	-0.474788	-0.23332	-0.270544	0.0422845	0.483859	-0.559324	-0.0453259	-0.394408	-0.0988538	0.115109	-0.143318	1.5759	-0.310802	-0.0606884	-0.777442	1.04226	-0.334839	0.055237	0.253515	-0.189785	0.0155665	-0.609693	0.0662642	-0.365173	0.144949	-0.115557	-0.257896	0.259997	-0.0717033	-0.0808155
-4.53895	-1.08633	1.90053	-0.117723	-0.325609	0.0352967	1.23906	-0.864385	-0.210374	0.166373	0.214545	0.0490016	0.353921	-0.655182	-0.224053	-0.248595	-0.277489	0.09228	0.226315	0.00110148	-0.474017	-0.233814	-0.270605	0.0437182	0.484148	-0.559284	-0.0459824	-0.394317	-0.100415	0.114994	-0.14306	1.57421	-0.309259	-0.0625411	-0.777799	1.04503	-0.333734	0.0535611	0.254026	-0.189187	0.0152188	-0.610515	0.066348	-0.365887	0.142852	-0.114424	-0.257149	0.260723	-0.0717614	-0.0831434
-4.53797	-1.08392	1.89747	-0.119557	-0.324607	0.0375003	1.24104	-0.866016	-0.210705	0.1663	0.212662	0.0493354	0.357528	-0.654017	-0.224487	-0.248272	-0.274346	0.093001	0.227428	0.000122945	-0.473239	-0.234307	-0.270681	0.0451657	0.48444	-0.559237	-0.0466402	-0.394229	-0.101975	0.114875	-0.142796	1.57251	-0.3077	-0.0643815	-0.778147	1.04777	-0.332629	0.051887	0.25454	-0.188589	0.0148851	-0.611345	0.0664275	-0.366589	0.140767	-0.113272	-0.256395	0.261421	-0.0718376	-0.0854576
-4.53699	-1.08151	1.89439	-0.121398	-0.323601	0.0397209	1.24297	-0.867648	-0.211045	0.166217	0.210776	0.0496452	0.361113	-0.652848	-0.224901	-0.247948	-0.271203	0.0937291	0.228536	-0.000876261	-0.472454	-0.234797	-0.270772	0.0466271	0.484733	-0.559183	-0.0472991	-0.394144	-0.103534	0.11475	-0.142525	1.57078	-0.306123	-0.0662095	-0.778488	1.05048	-0.331525	0.0502147	0.255059	-0.187991	0.0145654	-0.612184	0.0665026	-0.367279	0.138695	-0.112101	-0.255634	0.262091	-0.071932	-0.0877579
-4.53601	-1.0791	1.89127	-0.123247	-0.32259	0.0419585	1.24486	-0.86928	-0.211392	0.166126	0.208887	0.049931	0.364677	-0.651673	-0.225294	-0.247621	-0.268061	0.0944642	0.22964	-0.001896	-0.471663	-0.235285	-0.270878	0.0481021	0.48503	-0.559122	-0.0479591	-0.394062	-0.10509	0.114621	-0.142249	1.56904	-0.304531	-0.0680249	-0.778821	1.05316	-0.330422	0.0485443	0.255581	-0.187393	0.0142599	-0.613031	0.0665732	-0.367956	0.136635	-0.110911	-0.254867	0.262734	-0.0720447	-0.090044
-4.53502	-1.07668	1.88813	-0.125103	-0.321575	0.0442129	1.24671	-0.870913	-0.211748	0.166024	0.206995	0.0501926	0.368219	-0.650493	-0.225667	-0.247293	-0.264921	0.0952061	0.230738	-0.00293613	-0.470865	-0.23577	-0.270999	0.0495906	0.485329	-0.559054	-0.0486202	-0.393983	-0.106645	0.114487	-0.141967	1.56728	-0.302923	-0.0698274	-0.779145	1.05581	-0.329321	0.0468757	0.256108	-0.186796	0.0139685	-0.613886	0.0666394	-0.368622	0.134588	-0.109703	-0.254094	0.26335	-0.0721756	-0.0923158
-4.53404	-1.07427	1.88496	-0.126966	-0.320557	0.046484	1.24851	-0.872546	-0.212111	0.165914	0.205099	0.0504301	0.371738	-0.649309	-0.226019	-0.246963	-0.261781	0.0959549	0.231832	-0.00399649	-0.470061	-0.236253	-0.271136	0.0510925	0.485631	-0.558978	-0.0492825	-0.393907	-0.108197	0.114348	-0.141678	1.56551	-0.301299	-0.0716169	-0.779462	1.05843	-0.328221	0.045209	0.256637	-0.186199	0.0136914	-0.614748	0.066701	-0.369274	0.132555	-0.108476	-0.253315	0.263938	-0.0723248	-0.0945733
-4.53306	-1.07186	1.88176	-0.128836	-0.319534	0.0487715	1.25028	-0.87418	-0.212483	0.165794	0.203201	0.0506433	0.375235	-0.648119	-0.22635	-0.246632	-0.258642	0.0967104	0.23292	-0.00507695	-0.46925	-0.236733	-0.271288	0.0526076	0.485936	-0.558896	-0.0499458	-0.393834	-0.109747	0.114204	-0.141384	1.56372	-0.29966	-0.0733931	-0.779769	1.06101	-0.327122	0.0435443	0.257171	-0.185603	0.0134286	-0.615619	0.066758	-0.369915	0.130534	-0.10723	-0.252529	0.264498	-0.0724922	-0.0968161
-4.53207	-1.06944	1.87852	-0.130712	-0.318509	0.0510754	1.252	-0.875814	-0.212862	0.165665	0.201301	0.0508323	0.378708	-0.646925	-0.226661	-0.246299	-0.255505	0.0974724	0.234002	-0.00617734	-0.468433	-0.237209	-0.271455	0.0541358	0.486244	-0.558806	-0.0506101	-0.393765	-0.111294	0.114055	-0.141084	1.56191	-0.298006	-0.075156	-0.780069	1.06357	-0.326025	0.0418815	0.257708	-0.185006	0.0131802	-0.616498	0.0668104	-0.370542	0.128527	-0.105966	-0.251737	0.265032	-0.0726779	-0.0990442
-4.53109	-1.06703	1.87527	-0.132595	-0.317479	0.0533954	1.25368	-0.877448	-0.213249	0.165526	0.199397	0.050997	0.382159	-0.645725	-0.226951	-0.245965	-0.252369	0.0982409	0.235079	-0.00729751	-0.46761	-0.237683	-0.271638	0.0556769	0.486556	-0.558709	-0.0512755	-0.393699	-0.112838	0.113902	-0.140779	1.56009	-0.296337	-0.0769052	-0.780359	1.06609	-0.32493	0.0402206	0.258248	-0.18441	0.0129463	-0.617385	0.066858	-0.371157	0.126533	-0.104683	-0.25094	0.265537	-0.0728818	-0.101257
-4.53011	-1.06462	1.87198	-0.134484	-0.316447	0.0557314	1.25531	-0.879082	-0.213645	0.165378	0.197492	0.0511373	0.385587	-0.644522	-0.227221	-0.245631	-0.249235	0.0990158	0.23615	-0.0084373	-0.46678	-0.238153	-0.271836	0.0572307	0.486871	-0.558605	-0.0519419	-0.393636	-0.114379	0.113744	-0.140468	1.55825	-0.294654	-0.0786406	-0.780641	1.06858	-0.323838	0.0385617	0.258791	-0.183814	0.0127269	-0.61828	0.0669009	-0.371759	0.124553	-0.103382	-0.250136	0.266016	-0.073104	-0.103456
-4.52912	-1.0622	1.86867	-0.13638	-0.315411	0.0580833	1.25691	-0.880715	-0.214048	0.165221	0.195583	0.0512533	0.38899	-0.643313	-0.22747	-0.245295	-0.246103	0.0997969	0.237215	-0.00959654	-0.465943	-0.238619	-0.272051	0.0587972	0.487189	-0.558493	-0.0526092	-0.393578	-0.115917	0.113582	-0.140152	1.55639	-0.292957	-0.080362	-0.780914	1.07104	-0.322747	0.0369049	0.259337	-0.183218	0.0125222	-0.619182	0.066939	-0.372348	0.122587	-0.102063	-0.249326	0.266467	-0.0733445	-0.105639
-4.52814	-1.05979	1.86533	-0.138281	-0.314373	0.0604508	1.25846	-0.882349	-0.214459	0.165055	0.193673	0.0513447	0.392371	-0.6421	-0.227698	-0.244959	-0.242973	0.100584	0.238274	-0.0107751	-0.4651	-0.239082	-0.27228	0.0603762	0.487511	-0.558375	-0.0532775	-0.393523	-0.117452	0.113415	-0.13983	1.55452	-0.291246	-0.0820692	-0.781178	1.07346	-0.321659	0.0352501	0.259886	-0.182622	0.012332	-0.620092	0.0669722	-0.372924	0.120635	-0.100725	-0.24851	0.26689	-0.0736032	-0.107806
-4.52716	-1.05738	1.86196	-0.140188	-0.313332	0.0628338	1.25997	-0.883982	-0.214878	0.16488	0.19176	0.0514118	0.395727	-0.640883	-0.227906	-0.244623	-0.239846	0.101377	0.239326	-0.0119727	-0.464251	-0.239541	-0.272526	0.0619674	0.487837	-0.558249	-0.0539468	-0.393473	-0.118982	0.113244	-0.139503	1.55263	-0.289521	-0.0837621	-0.781432	1.07586	-0.320574	0.0335973	0.260437	-0.182027	0.0121566	-0.62101	0.0670005	-0.373487	0.118697	-0.0993699	-0.247689	0.267287	-0.0738802	-0.109958
-4.52617	-1.05497	1.85856	-0.142101	-0.312289	0.065232	1.26144	-0.885615	-0.215305	0.164695	0.189845	0.0514543	0.399058	-0.639661	-0.228093	-0.244286	-0.236721	0.102176	0.240373	-0.0131892	-0.463395	-0.239997	-0.272787	0.0635708	0.488166	-0.558116	-0.054617	-0.393426	-0.120509	0.113068	-0.139171	1.55072	-0.287784	-0.0854404	-0.781678	1.07821	-0.319491	0.0319467	0.260991	-0.181431	0.0119959	-0.621936	0.0670238	-0.374037	0.116774	-0.0979965	-0.246861	0.267656	-0.0741755	-0.112095
-4.52519	-1.05256	1.85514	-0.144019	-0.311243	0.0676454	1.26287	-0.887247	-0.215739	0.164501	0.187929	0.0514722	0.402366	-0.638435	-0.228259	-0.24395	-0.233599	0.102981	0.241412	-0.0144246	-0.462533	-0.240448	-0.273064	0.0651863	0.488499	-0.557975	-0.0552881	-0.393384	-0.122032	0.112888	-0.138835	1.5488	-0.286033	-0.087104	-0.781914	1.08054	-0.318412	0.0302981	0.261548	-0.180836	0.01185	-0.622869	0.0670421	-0.374573	0.114865	-0.0966053	-0.246028	0.267998	-0.074489	-0.114216
-4.52421	-1.05016	1.8517	-0.145942	-0.310195	0.0700737	1.26425	-0.888878	-0.216182	0.164298	0.18601	0.0514657	0.405648	-0.637204	-0.228404	-0.243613	-0.23048	0.103792	0.242446	-0.0156784	-0.461665	-0.240894	-0.273357	0.0668135	0.488837	-0.557828	-0.0559601	-0.393346	-0.12355	0.112704	-0.138493	1.54686	-0.284269	-0.0887527	-0.782141	1.08283	-0.317336	0.0286517	0.262107	-0.180241	0.0117189	-0.62381	0.0670553	-0.375096	0.112971	-0.0951964	-0.24519	0.268312	-0.0748207	-0.116321
-4.52323	-1.04775	1.84823	-0.147871	-0.309145	0.0725168	1.26559	-0.890509	-0.216633	0.164085	0.184089	0.0514345	0.408906	-0.635969	-0.228529	-0.243276	-0.227363	0.104608	0.243472	-0.0169507	-0.46079	-0.241337	-0.273665	0.0684525	0.489179	-0.557673	-0.0566329	-0.393312	-0.125064	0.112516	-0.138147	1.54491	-0.282493	-0.0903863	-0.782358	1.08509	-0.316263	0.0270074	0.262668	-0.179646	0.0116027	-0.624759	0.0670635	-0.375605	0.111092	-0.0937698	-0.244346	0.2686	-0.0751707	-0.118409
-4.52224	-1.04535	1.84473	-0.149804	-0.308093	0.0749744	1.26689	-0.892138	-0.217091	0.163864	0.182167	0.0513787	0.412139	-0.63473	-0.228633	-0.24294	-0.22425	0.105429	0.244491	-0.0182412	-0.45991	-0.241775	-0.27399	0.070103	0.489525	-0.55751	-0.0573067	-0.393283	-0.126573	0.112323	-0.137795	1.54294	-0.280705	-0.0920047	-0.782565	1.08732	-0.315193	0.0253652	0.263231	-0.179051	0.0115015	-0.625714	0.0670665	-0.376101	0.109228	-0.0923257	-0.243496	0.268861	-0.0755389	-0.120482
-4.52126	-1.04295	1.84121	-0.151742	-0.30704	0.0774463	1.26814	-0.893767	-0.217558	0.163633	0.180243	0.0512983	0.415346	-0.633487	-0.228717	-0.242605	-0.22114	0.106256	0.245504	-0.0195496	-0.459023	-0.242208	-0.274331	0.0717649	0.489875	-0.557341	-0.0579813	-0.393259	-0.128078	0.112126	-0.13744	1.54096	-0.278905	-0.0936076	-0.782763	1.08951	-0.314128	0.0237253	0.263796	-0.178456	0.0114152	-0.626678	0.0670643	-0.376583	0.107379	-0.0908642	-0.242641	0.269094	-0.0759253	-0.122538
-4.52028	-1.04055	1.83767	-0.153685	-0.305986	0.0799325	1.26936	-0.895394	-0.218032	0.163394	0.178318	0.0511932	0.418528	-0.63224	-0.22878	-0.24227	-0.218034	0.107088	0.246509	-0.0208759	-0.458129	-0.242636	-0.274687	0.073438	0.49023	-0.557164	-0.0586567	-0.393239	-0.129577	0.111926	-0.13708	1.53896	-0.277094	-0.0951949	-0.782951	1.09167	-0.313066	0.0220875	0.264362	-0.177861	0.0113439	-0.627648	0.0670568	-0.377051	0.105546	-0.0893854	-0.241781	0.269301	-0.0763299	-0.124578
-4.51929	-1.03816	1.8341	-0.155632	-0.30493	0.0824326	1.27053	-0.89702	-0.218514	0.163145	0.176391	0.0510635	0.421684	-0.630989	-0.228822	-0.241936	-0.214932	0.107925	0.247506	-0.0222197	-0.45723	-0.243059	-0.27506	0.0751221	0.49059	-0.55698	-0.059333	-0.393224	-0.131071	0.111721	-0.136716	1.53695	-0.275271	-0.0967665	-0.783129	1.09379	-0.312008	0.020452	0.26493	-0.177267	0.0112877	-0.628626	0.0670441	-0.377506	0.103728	-0.0878894	-0.240916	0.269481	-0.0767527	-0.126602
-4.51831	-1.03577	1.8305	-0.157584	-0.303873	0.0849465	1.27166	-0.898645	-0.219004	0.162887	0.174463	0.0509092	0.424814	-0.629734	-0.228844	-0.241603	-0.211833	0.108766	0.248496	-0.023581	-0.456325	-0.243477	-0.275449	0.0768171	0.490954	-0.556788	-0.0600101	-0.393215	-0.132559	0.111513	-0.136347	1.53492	-0.273437	-0.0983222	-0.783296	1.09588	-0.310955	0.0188188	0.2655	-0.176672	0.0112465	-0.629611	0.0670261	-0.377946	0.101925	-0.0863764	-0.240046	0.269634	-0.0771936	-0.128609
-4.51733	-1.03338	1.82689	-0.159539	-0.302816	0.087474	1.27274	-0.900268	-0.219502	0.16262	0.172534	0.0507301	0.427918	-0.628475	-0.228845	-0.241271	-0.208738	0.109613	0.249479	-0.0249594	-0.455413	-0.243889	-0.275854	0.0785229	0.491323	-0.556589	-0.0606881	-0.39321	-0.134042	0.1113	-0.135974	1.53287	-0.271593	-0.0998617	-0.783453	1.09793	-0.309906	0.0171878	0.266071	-0.176078	0.0112204	-0.630603	0.0670027	-0.378373	0.100139	-0.0848464	-0.23917	0.26976	-0.0776527	-0.130599
-4.51634	-1.03099	1.82325	-0.161498	-0.301758	0.0900148	1.27379	-0.90189	-0.220008	0.162344	0.170604	0.0505263	0.430996	-0.627212	-0.228826	-0.240941	-0.205648	0.110464	0.250453	-0.0263548	-0.454496	-0.244296	-0.276275	0.0802392	0.491697	-0.556383	-0.0613668	-0.39321	-0.135519	0.111084	-0.135598	1.53082	-0.269738	-0.101385	-0.7836	1.09995	-0.308862	0.0155591	0.266644	-0.175484	0.0112094	-0.631603	0.066974	-0.378785	0.0983684	-0.0832996	-0.23829	0.26986	-0.0781298	-0.132572
-4.51536	-1.02861	1.81959	-0.163461	-0.300699	0.0925689	1.27479	-0.90351	-0.220522	0.16206	0.168673	0.0502979	0.434047	-0.625946	-0.228786	-0.240612	-0.202562	0.111319	0.25142	-0.027767	-0.453572	-0.244698	-0.276713	0.081966	0.492076	-0.556169	-0.0620463	-0.393216	-0.13699	0.110865	-0.135217	1.52874	-0.267874	-0.102892	-0.783737	1.10193	-0.307823	0.0139327	0.267217	-0.17489	0.0112135	-0.632609	0.0669398	-0.379184	0.0966139	-0.0817361	-0.237405	0.269933	-0.0786251	-0.134528
-4.51438	-1.02623	1.8159	-0.165427	-0.29964	0.0951359	1.27575	-0.905128	-0.221044	0.161766	0.16674	0.0500448	0.437072	-0.624675	-0.228725	-0.240285	-0.19948	0.112179	0.252379	-0.0291957	-0.452643	-0.245094	-0.277166	0.0837029	0.492461	-0.555949	-0.0627267	-0.393227	-0.138455	0.110641	-0.134833	1.52665	-0.265999	-0.104382	-0.783863	1.10388	-0.306789	0.0123086	0.267791	-0.174296	0.0112327	-0.633623	0.0669002	-0.379568	0.0948757	-0.0801561	-0.236515	0.26998	-0.0791384	-0.136466
-4.5134	-1.02386	1.8122	-0.167396	-0.298581	0.0977156	1.27667	-0.906744	-0.221573	0.161463	0.164808	0.049767	0.440069	-0.623401	-0.228644	-0.23996	-0.196403	0.113043	0.253329	-0.0306408	-0.451707	-0.245483	-0.277636	0.08545	0.49285	-0.55572	-0.0634078	-0.393243	-0.139913	0.110414	-0.134446	1.52455	-0.264115	-0.105856	-0.783978	1.10579	-0.305759	0.0106869	0.268367	-0.173702	0.0112671	-0.634643	0.066855	-0.379938	0.0931538	-0.0785596	-0.23562	0.27	-0.0796698	-0.138388
-4.51241	-1.02148	1.80847	-0.169369	-0.297522	0.100308	1.27754	-0.908358	-0.222111	0.161152	0.162874	0.0494645	0.443039	-0.622124	-0.228543	-0.239636	-0.193331	0.113911	0.254271	-0.0321019	-0.450766	-0.245867	-0.278122	0.0872069	0.493245	-0.555485	-0.0640897	-0.393265	-0.141365	0.110184	-0.134054	1.52243	-0.262222	-0.107313	-0.784083	1.10767	-0.304736	0.00906747	0.268943	-0.173108	0.0113167	-0.635671	0.0668044	-0.380293	0.0914485	-0.0769468	-0.234721	0.269994	-0.0802192	-0.140292
-4.51143	-1.01912	1.80473	-0.171345	-0.296464	0.102912	1.27838	-0.90997	-0.222656	0.160831	0.16094	0.0491373	0.445983	-0.620843	-0.228421	-0.239315	-0.190264	0.114783	0.255204	-0.0335789	-0.449819	-0.246244	-0.278625	0.0889736	0.493646	-0.555242	-0.0647724	-0.393293	-0.142809	0.10995	-0.13366	1.5203	-0.260319	-0.108753	-0.784177	1.1095	-0.303717	0.00745046	0.269519	-0.172515	0.0113814	-0.636705	0.0667482	-0.380634	0.0897597	-0.0753179	-0.233818	0.269962	-0.0807865	-0.142179
-4.51045	-1.01676	1.80096	-0.173323	-0.295406	0.105529	1.27917	-0.91158	-0.223209	0.160502	0.159005	0.0487854	0.448898	-0.619558	-0.228279	-0.238996	-0.187202	0.115658	0.256129	-0.0350715	-0.448867	-0.246615	-0.279144	0.0907498	0.494052	-0.554992	-0.0654559	-0.393326	-0.144247	0.109713	-0.133262	1.51815	-0.258409	-0.110175	-0.784259	1.11131	-0.302705	0.00583584	0.270096	-0.171921	0.0114613	-0.637746	0.0666864	-0.380961	0.0880878	-0.073673	-0.23291	0.269904	-0.0813718	-0.144048
-4.50946	-1.0144	1.79717	-0.175304	-0.294349	0.108158	1.27992	-0.913188	-0.22377	0.160164	0.15707	0.0484089	0.451786	-0.61827	-0.228117	-0.23868	-0.184145	0.116538	0.257045	-0.0365796	-0.447908	-0.246979	-0.279679	0.0925355	0.494464	-0.554735	-0.0661402	-0.393365	-0.145678	0.109472	-0.132861	1.51599	-0.256489	-0.111581	-0.784331	1.11307	-0.301698	0.00422362	0.270673	-0.171328	0.0115564	-0.638794	0.066619	-0.381273	0.0864327	-0.0720122	-0.231998	0.269819	-0.081975	-0.1459
-4.50848	-1.01205	1.79336	-0.177287	-0.293292	0.110798	1.28063	-0.914793	-0.224339	0.159817	0.155135	0.0480078	0.454647	-0.616978	-0.227934	-0.238366	-0.181094	0.11742	0.257952	-0.0381028	-0.446944	-0.247337	-0.28023	0.0943304	0.494881	-0.55447	-0.0668252	-0.39341	-0.147101	0.109229	-0.132457	1.51382	-0.254562	-0.112969	-0.784391	1.1148	-0.300698	0.00261383	0.271251	-0.170735	0.0116667	-0.639848	0.0665459	-0.381571	0.0847946	-0.0703356	-0.231082	0.269709	-0.0825961	-0.147734
-4.5075	-1.0097	1.78954	-0.179272	-0.292237	0.11345	1.2813	-0.916395	-0.224916	0.159461	0.153199	0.047582	0.457479	-0.615683	-0.227732	-0.238055	-0.178048	0.118306	0.25885	-0.0396409	-0.445975	-0.247687	-0.280798	0.0961343	0.495305	-0.554198	-0.067511	-0.393461	-0.148517	0.108982	-0.13205	1.51163	-0.252627	-0.114339	-0.78444	1.1165	-0.299704	0.00100648	0.271828	-0.170142	0.0117922	-0.640909	0.0664672	-0.381853	0.0831736	-0.0686435	-0.230162	0.269573	-0.083235	-0.149549
-4.50651	-1.00736	1.78569	-0.181259	-0.291183	0.116113	1.28192	-0.917995	-0.225501	0.159097	0.151263	0.0471317	0.460283	-0.614385	-0.227509	-0.237747	-0.175007	0.119195	0.259739	-0.0411938	-0.445	-0.248031	-0.281383	0.0979472	0.495734	-0.553919	-0.0681976	-0.393517	-0.149925	0.108732	-0.13164	1.50943	-0.250684	-0.115692	-0.784478	1.11815	-0.298716	-0.000598416	0.272405	-0.16955	0.0119328	-0.641977	0.0663828	-0.382122	0.0815699	-0.0669359	-0.229238	0.269411	-0.0838917	-0.151347
-4.50553	-1.00502	1.78183	-0.183248	-0.29013	0.118787	1.2825	-0.919592	-0.226094	0.158723	0.149328	0.0466567	0.463059	-0.613083	-0.227266	-0.237442	-0.171973	0.120087	0.260618	-0.042761	-0.444019	-0.248367	-0.281984	0.0997688	0.496169	-0.553633	-0.068885	-0.39358	-0.151325	0.108479	-0.131228	1.50721	-0.248734	-0.117027	-0.784504	1.11977	-0.297735	-0.00220084	0.272983	-0.168957	0.0120886	-0.643051	0.0662927	-0.382375	0.0799836	-0.065213	-0.22831	0.269224	-0.0845662	-0.153127
-4.50455	-1.00269	1.77795	-0.185239	-0.289079	0.121472	1.28305	-0.921186	-0.226694	0.158342	0.147392	0.0461572	0.465806	-0.611779	-0.227003	-0.23714	-0.168944	0.120982	0.261488	-0.0443425	-0.443033	-0.248696	-0.282601	0.101599	0.496611	-0.553339	-0.0695731	-0.393649	-0.152717	0.108224	-0.130813	1.50498	-0.246778	-0.118344	-0.784519	1.12135	-0.29676	-0.00380079	0.27356	-0.168365	0.0122595	-0.644132	0.0661969	-0.382614	0.0784147	-0.0634749	-0.227379	0.269011	-0.0852583	-0.154889
-4.50356	-1.00036	1.77405	-0.187231	-0.28803	0.124167	1.28355	-0.922777	-0.227303	0.157951	0.145457	0.0456332	0.468525	-0.610471	-0.22672	-0.236842	-0.165922	0.12188	0.262348	-0.0459378	-0.442042	-0.249018	-0.283235	0.103437	0.497059	-0.553038	-0.0702621	-0.393724	-0.1541	0.107965	-0.130396	1.50274	-0.244814	-0.119643	-0.784522	1.1229	-0.295793	-0.00539824	0.274136	-0.167773	0.0124455	-0.645219	0.0660953	-0.382838	0.0768634	-0.0617219	-0.226444	0.268773	-0.0859682	-0.156632
-4.50258	-0.998042	1.77013	-0.189224	-0.286983	0.126873	1.28401	-0.924365	-0.227919	0.157552	0.143522	0.0450847	0.471215	-0.609159	-0.226418	-0.236547	-0.162905	0.12278	0.263199	-0.0475469	-0.441045	-0.249331	-0.283885	0.105284	0.497513	-0.55273	-0.0709518	-0.393806	-0.155476	0.107704	-0.129976	1.50048	-0.242844	-0.120923	-0.784514	1.1244	-0.294832	-0.00699317	0.274712	-0.167182	0.0126467	-0.646312	0.0659879	-0.383046	0.0753298	-0.059954	-0.225505	0.26851	-0.0866957	-0.158357
-4.5016	-0.995729	1.7662	-0.191218	-0.285938	0.129588	1.28443	-0.92595	-0.228543	0.157145	0.141588	0.0445117	0.473876	-0.607845	-0.226095	-0.236256	-0.159895	0.123682	0.26404	-0.0491694	-0.440043	-0.249637	-0.284552	0.107139	0.497973	-0.552415	-0.0716423	-0.393893	-0.156842	0.10744	-0.129555	1.49821	-0.240869	-0.122186	-0.784493	1.12587	-0.293879	-0.00858558	0.275287	-0.166591	0.012863	-0.647411	0.0658747	-0.38324	0.073814	-0.0581715	-0.224563	0.268221	-0.0874407	-0.160064
-4.50062	-0.993422	1.76225	-0.193213	-0.284896	0.132314	1.28481	-0.927532	-0.229175	0.156729	0.139654	0.0439143	0.476508	-0.606528	-0.225753	-0.235969	-0.156891	0.124587	0.26487	-0.050805	-0.439037	-0.249936	-0.285235	0.109001	0.49844	-0.552093	-0.0723336	-0.393988	-0.1582	0.107173	-0.129131	1.49593	-0.238887	-0.12343	-0.78446	1.1273	-0.292934	-0.0101755	0.275862	-0.166	0.0130943	-0.648517	0.0657557	-0.383419	0.0723161	-0.0563745	-0.223618	0.267908	-0.0882033	-0.161752
-4.49963	-0.991122	1.75828	-0.195209	-0.283856	0.135049	1.28514	-0.92911	-0.229815	0.156305	0.13772	0.0432924	0.47911	-0.605207	-0.225392	-0.235685	-0.153894	0.125493	0.265691	-0.0524535	-0.438025	-0.250225	-0.285934	0.110872	0.498914	-0.551763	-0.0730257	-0.394088	-0.159549	0.106904	-0.128705	1.49364	-0.2369	-0.124655	-0.784416	1.1287	-0.291996	-0.0117628	0.276435	-0.165409	0.0133407	-0.649629	0.0656309	-0.383584	0.0708361	-0.0545631	-0.22267	0.267569	-0.0889833	-0.163421
-4.49865	-0.988829	1.7543	-0.197205	-0.282819	0.137794	1.28544	-0.930685	-0.230463	0.155872	0.135788	0.0426463	0.481683	-0.603884	-0.22501	-0.235406	-0.150904	0.126402	0.266501	-0.0541146	-0.437008	-0.250507	-0.28665	0.11275	0.499394	-0.551426	-0.0737187	-0.394195	-0.160889	0.106633	-0.128278	1.49133	-0.234907	-0.125862	-0.784359	1.13005	-0.291066	-0.0133475	0.277007	-0.164819	0.0136021	-0.650747	0.0655003	-0.383732	0.0693743	-0.0527375	-0.221719	0.267206	-0.0897808	-0.165072
-4.49767	-0.986543	1.7503	-0.199201	-0.281785	0.140548	1.2857	-0.932256	-0.231119	0.15543	0.133856	0.0419758	0.484227	-0.602557	-0.224609	-0.235131	-0.14792	0.127312	0.2673	-0.0557881	-0.435986	-0.25078	-0.287383	0.114635	0.499881	-0.551083	-0.0744124	-0.394309	-0.162219	0.106359	-0.127849	1.48901	-0.23291	-0.12705	-0.78429	1.13137	-0.290144	-0.0149297	0.277579	-0.16423	0.0138784	-0.651871	0.0653638	-0.383866	0.0679306	-0.0508979	-0.220765	0.266819	-0.0905956	-0.166704
-4.49668	-0.984263	1.74629	-0.201197	-0.280755	0.14331	1.28591	-0.933824	-0.231782	0.154981	0.131925	0.0412811	0.486741	-0.601228	-0.224189	-0.234861	-0.144943	0.128224	0.26809	-0.0574737	-0.434959	-0.251045	-0.288132	0.116527	0.500375	-0.550732	-0.0751069	-0.394429	-0.16354	0.106083	-0.127418	1.48667	-0.230908	-0.128219	-0.784209	1.13264	-0.28923	-0.0165093	0.278149	-0.16364	0.0141698	-0.653	0.0652214	-0.383985	0.0665052	-0.0490444	-0.219808	0.266407	-0.0914277	-0.168318
-4.4957	-0.981992	1.74227	-0.203194	-0.279727	0.146082	1.28609	-0.935388	-0.232454	0.154523	0.129996	0.0405622	0.489226	-0.599895	-0.22375	-0.234595	-0.141974	0.129137	0.268868	-0.0591711	-0.433927	-0.251301	-0.288897	0.118426	0.500875	-0.550374	-0.0758023	-0.394557	-0.164851	0.105805	-0.126986	1.48433	-0.228902	-0.129369	-0.784115	1.13388	-0.288325	-0.0180863	0.278717	-0.163052	0.014476	-0.654136	0.0650731	-0.384089	0.0650982	-0.0471773	-0.218849	0.265971	-0.0922771	-0.169912
-4.49472	-0.979728	1.73823	-0.205189	-0.278703	0.148861	1.28623	-0.936948	-0.233133	0.154057	0.128067	0.0398191	0.49168	-0.59856	-0.223291	-0.234334	-0.139011	0.130052	0.269636	-0.06088	-0.432891	-0.251548	-0.289679	0.120332	0.501383	-0.550009	-0.0764985	-0.39469	-0.166153	0.105524	-0.126553	1.48197	-0.226891	-0.1305	-0.784009	1.13508	-0.287428	-0.0196607	0.279285	-0.162463	0.0147971	-0.655278	0.064919	-0.384177	0.0637096	-0.0452967	-0.217887	0.26551	-0.0931436	-0.171488
-4.49373	-0.977471	1.73418	-0.207185	-0.277683	0.151649	1.28632	-0.938504	-0.233821	0.153582	0.12614	0.0390519	0.494105	-0.597222	-0.222813	-0.234078	-0.136056	0.130967	0.270392	-0.0626002	-0.43185	-0.251786	-0.290477	0.122245	0.501897	-0.549637	-0.0771956	-0.394831	-0.167444	0.105242	-0.126118	1.4796	-0.224877	-0.131611	-0.78389	1.13625	-0.28654	-0.0212325	0.27985	-0.161876	0.015133	-0.656425	0.0647589	-0.384251	0.0623395	-0.0434027	-0.216923	0.265026	-0.0940273	-0.173044
-4.49275	-0.975223	1.73011	-0.209179	-0.276667	0.154445	1.28638	-0.940056	-0.234516	0.1531	0.124213	0.0382607	0.496499	-0.595882	-0.222316	-0.233826	-0.133108	0.131884	0.271138	-0.0643313	-0.430804	-0.252015	-0.291292	0.124165	0.502419	-0.549258	-0.0778935	-0.394978	-0.168726	0.104958	-0.125683	1.47721	-0.222859	-0.132704	-0.783759	1.13737	-0.28566	-0.0228016	0.280414	-0.161289	0.0154837	-0.657578	0.064593	-0.384309	0.060988	-0.0414956	-0.215957	0.264517	-0.0949281	-0.174582
-4.49177	-0.972983	1.72604	-0.211173	-0.275655	0.157249	1.2864	-0.941604	-0.235219	0.152609	0.122289	0.0374455	0.498863	-0.594538	-0.221801	-0.23358	-0.130167	0.132801	0.271872	-0.0660731	-0.429754	-0.252235	-0.292123	0.12609	0.502948	-0.548872	-0.0785923	-0.395132	-0.169997	0.104672	-0.125247	1.47482	-0.220837	-0.133777	-0.783615	1.13845	-0.28479	-0.0243681	0.280976	-0.160702	0.0158492	-0.658736	0.0644211	-0.384352	0.0596553	-0.0395755	-0.214988	0.263986	-0.0958458	-0.1761
-4.49079	-0.970751	1.72195	-0.213166	-0.274647	0.16006	1.28637	-0.943148	-0.23593	0.15211	0.120366	0.0366063	0.501196	-0.593192	-0.221266	-0.233339	-0.127234	0.133719	0.272595	-0.0678253	-0.4287	-0.252445	-0.292971	0.128022	0.503484	-0.548479	-0.079292	-0.395293	-0.171257	0.104384	-0.124809	1.47241	-0.218813	-0.134831	-0.783458	1.1395	-0.283929	-0.025932	0.281536	-0.160116	0.0162293	-0.6599	0.0642434	-0.38438	0.0583412	-0.0376426	-0.214018	0.26343	-0.0967805	-0.1776
-4.4898	-0.968527	1.71785	-0.215157	-0.273644	0.162878	1.28631	-0.944687	-0.236648	0.151603	0.118444	0.0357433	0.503499	-0.591843	-0.220713	-0.233104	-0.124309	0.134637	0.273307	-0.0695876	-0.427641	-0.252646	-0.293835	0.129959	0.504027	-0.54808	-0.0799925	-0.395461	-0.172507	0.104094	-0.124372	1.46999	-0.216786	-0.135865	-0.783288	1.1405	-0.283077	-0.0274932	0.282094	-0.159531	0.016624	-0.66107	0.0640597	-0.384392	0.057046	-0.0356971	-0.213045	0.262851	-0.0977321	-0.17908
-4.48882	-0.966313	1.71374	-0.217147	-0.272646	0.165703	1.28621	-0.946222	-0.237375	0.151088	0.116525	0.0348565	0.505771	-0.590491	-0.220141	-0.232874	-0.121391	0.135555	0.274006	-0.0713596	-0.426578	-0.252837	-0.294715	0.131903	0.504578	-0.547673	-0.080694	-0.395636	-0.173746	0.103803	-0.123933	1.46756	-0.214757	-0.136879	-0.783105	1.14147	-0.282234	-0.0290517	0.282649	-0.158947	0.0170333	-0.662245	0.0638701	-0.384389	0.0557697	-0.0337392	-0.212071	0.262249	-0.0987004	-0.18054
-4.48784	-0.964107	1.70961	-0.219135	-0.271652	0.168535	1.28607	-0.947753	-0.23811	0.150565	0.114607	0.0339459	0.508013	-0.589137	-0.219551	-0.232649	-0.118481	0.136474	0.274695	-0.0731412	-0.425511	-0.253018	-0.295612	0.133852	0.505136	-0.54726	-0.0813964	-0.395818	-0.174975	0.10351	-0.123495	1.46512	-0.212725	-0.137874	-0.782909	1.14239	-0.281402	-0.0306076	0.283203	-0.158363	0.0174572	-0.663425	0.0636746	-0.384371	0.0545123	-0.0317691	-0.211096	0.261624	-0.0996855	-0.181982
-4.48685	-0.96191	1.70548	-0.221121	-0.270663	0.171373	1.28589	-0.949278	-0.238852	0.150034	0.112691	0.0330117	0.510224	-0.58778	-0.218942	-0.232431	-0.11558	0.137392	0.275371	-0.074932	-0.42444	-0.253188	-0.296524	0.135806	0.505702	-0.54684	-0.0820997	-0.396007	-0.176192	0.103216	-0.123056	1.46267	-0.210691	-0.138849	-0.782699	1.14328	-0.280579	-0.0321608	0.283754	-0.15778	0.0178954	-0.664611	0.0634731	-0.384338	0.053274	-0.0297869	-0.210119	0.260976	-0.100687	-0.183404
-4.48587	-0.959723	1.70134	-0.223105	-0.26968	0.174218	1.28568	-0.9508	-0.239602	0.149496	0.110777	0.0320539	0.512404	-0.586421	-0.218315	-0.232219	-0.112686	0.13831	0.276035	-0.0767317	-0.423365	-0.253349	-0.297454	0.137765	0.506275	-0.546413	-0.0828039	-0.396203	-0.177398	0.102921	-0.122617	1.4602	-0.208656	-0.139804	-0.782477	1.14413	-0.279766	-0.0337112	0.284302	-0.157198	0.0183481	-0.665802	0.0632658	-0.384289	0.0520547	-0.0277929	-0.209141	0.260305	-0.101705	-0.184806
-4.48489	-0.957545	1.69719	-0.225087	-0.268702	0.177068	1.28542	-0.952316	-0.24036	0.148949	0.108866	0.0310726	0.514552	-0.585059	-0.21767	-0.232012	-0.1098	0.139228	0.276687	-0.07854	-0.422286	-0.2535	-0.298399	0.13973	0.506856	-0.545979	-0.0835091	-0.396407	-0.178592	0.102624	-0.122177	1.45773	-0.206619	-0.140739	-0.782241	1.14494	-0.278963	-0.035259	0.284848	-0.156617	0.018815	-0.666998	0.0630525	-0.384225	0.0508546	-0.0257872	-0.208161	0.259612	-0.10274	-0.186189
-4.4839	-0.955377	1.69303	-0.227066	-0.26773	0.179925	1.28513	-0.953828	-0.241126	0.148395	0.106956	0.0300678	0.51667	-0.583694	-0.217007	-0.231812	-0.106923	0.140145	0.277327	-0.0803567	-0.421203	-0.25364	-0.299361	0.1417	0.507445	-0.545539	-0.0842152	-0.396617	-0.179775	0.102326	-0.121738	1.45524	-0.204582	-0.141654	-0.781992	1.1457	-0.278171	-0.0368041	0.285391	-0.156036	0.0192962	-0.668199	0.0628334	-0.384146	0.0496736	-0.02377	-0.207181	0.258896	-0.103791	-0.187553
-4.48292	-0.953219	1.68886	-0.229042	-0.266764	0.182786	1.2848	-0.955335	-0.2419	0.147833	0.105049	0.0290397	0.518756	-0.582327	-0.216326	-0.231618	-0.104053	0.141061	0.277955	-0.0821813	-0.420116	-0.253769	-0.300339	0.143674	0.508041	-0.545092	-0.0849224	-0.396834	-0.180947	0.102027	-0.1213	1.45275	-0.202543	-0.14255	-0.781729	1.14643	-0.277389	-0.0383465	0.285932	-0.155457	0.0197916	-0.669405	0.0626083	-0.384052	0.0485119	-0.0217416	-0.2062	0.258158	-0.104859	-0.188897
-4.48194	-0.95107	1.68469	-0.231016	-0.265803	0.185653	1.28443	-0.956836	-0.242682	0.147263	0.103145	0.0279884	0.520811	-0.580958	-0.215627	-0.231431	-0.101193	0.141976	0.27857	-0.0840135	-0.419026	-0.253888	-0.301333	0.145652	0.508645	-0.544639	-0.0856305	-0.397058	-0.182106	0.101727	-0.120861	1.45024	-0.200503	-0.143425	-0.781453	1.14712	-0.276618	-0.0398861	0.286469	-0.154879	0.0203011	-0.670616	0.0623773	-0.383942	0.0473695	-0.0197021	-0.205218	0.257399	-0.105943	-0.190221
-4.48095	-0.948932	1.6805	-0.232987	-0.264849	0.188525	1.28403	-0.958333	-0.243471	0.146686	0.101243	0.0269138	0.522834	-0.579586	-0.214911	-0.23125	-0.0983402	0.14289	0.279172	-0.0858532	-0.417932	-0.253995	-0.302343	0.147636	0.509256	-0.544179	-0.0863397	-0.39729	-0.183254	0.101426	-0.120423	1.44772	-0.198464	-0.144279	-0.781163	1.14776	-0.275857	-0.0414231	0.287003	-0.154302	0.0208246	-0.671832	0.0621405	-0.383817	0.0462464	-0.0176517	-0.204235	0.256617	-0.107043	-0.191526
-4.47997	-0.946804	1.67631	-0.234954	-0.263901	0.191401	1.28358	-0.959824	-0.244269	0.146101	0.0993431	0.0258162	0.524826	-0.578211	-0.214177	-0.231077	-0.0954964	0.143802	0.279762	-0.0876999	-0.416835	-0.254092	-0.303369	0.149623	0.509876	-0.543712	-0.0870498	-0.397529	-0.184389	0.101125	-0.119986	1.44519	-0.196424	-0.145114	-0.78086	1.14837	-0.275107	-0.0429573	0.287535	-0.153726	0.021362	-0.673053	0.0618977	-0.383676	0.0451427	-0.0155907	-0.203252	0.255814	-0.108159	-0.192811
-4.47899	-0.944687	1.67212	-0.236918	-0.262959	0.194282	1.2831	-0.96131	-0.245074	0.145508	0.0974464	0.0246955	0.526787	-0.576835	-0.213425	-0.23091	-0.0926612	0.144714	0.280339	-0.0895534	-0.415735	-0.254178	-0.304412	0.151614	0.510503	-0.543239	-0.087761	-0.397775	-0.185513	0.100822	-0.119549	1.44265	-0.194384	-0.145928	-0.780542	1.14894	-0.274369	-0.0444888	0.288063	-0.153151	0.0219133	-0.674279	0.0616491	-0.383521	0.0440584	-0.0135192	-0.202269	0.254989	-0.109291	-0.194077
-4.47801	-0.942581	1.66791	-0.238879	-0.262025	0.197167	1.28259	-0.962791	-0.245887	0.144908	0.0955526	0.023552	0.528716	-0.575455	-0.212657	-0.23075	-0.0898346	0.145623	0.280903	-0.0914133	-0.414631	-0.254252	-0.30547	0.153609	0.511139	-0.54276	-0.0884733	-0.398028	-0.186624	0.10052	-0.119114	1.44011	-0.192345	-0.146722	-0.780211	1.14947	-0.273642	-0.0460175	0.288588	-0.152577	0.0224783	-0.675509	0.0613947	-0.38335	0.0429936	-0.0114374	-0.201285	0.254143	-0.110439	-0.195323
-4.47702	-0.940485	1.66371	-0.240835	-0.261097	0.200056	1.28204	-0.964267	-0.246708	0.144301	0.0936616	0.0223856	0.530612	-0.574074	-0.211871	-0.230597	-0.0870169	0.146531	0.281453	-0.0932792	-0.413525	-0.254315	-0.306544	0.155608	0.511782	-0.542274	-0.0891867	-0.398288	-0.187722	0.100216	-0.118679	1.43755	-0.190307	-0.147495	-0.779866	1.14995	-0.272926	-0.0475435	0.289109	-0.152004	0.023057	-0.676744	0.0611344	-0.383164	0.0419483	-0.00934559	-0.200302	0.253275	-0.111602	-0.196549
-4.47604	-0.9384	1.6595	-0.242788	-0.260176	0.202949	1.28145	-0.965736	-0.247537	0.143686	0.0917738	0.0211965	0.532478	-0.57269	-0.211069	-0.230451	-0.0842079	0.147436	0.281991	-0.095151	-0.412415	-0.254366	-0.307635	0.15761	0.512433	-0.541782	-0.0899011	-0.398556	-0.188808	0.099912	-0.118245	1.43498	-0.188269	-0.148248	-0.779507	1.1504	-0.272221	-0.0490667	0.289627	-0.151433	0.0236493	-0.677983	0.0608683	-0.382963	0.0409224	-0.00724395	-0.199319	0.252387	-0.112782	-0.197755
-4.47506	-0.936327	1.65528	-0.244736	-0.259262	0.205845	1.28082	-0.967201	-0.248373	0.143064	0.089889	0.0199848	0.534311	-0.571304	-0.210249	-0.230313	-0.0814078	0.14834	0.282515	-0.0970283	-0.411302	-0.254406	-0.308741	0.159615	0.513092	-0.541284	-0.0906166	-0.39883	-0.189881	0.0996077	-0.117813	1.4324	-0.186233	-0.148981	-0.779134	1.1508	-0.271528	-0.0505872	0.290141	-0.150863	0.0242551	-0.679227	0.0605963	-0.382746	0.0399161	-0.00513268	-0.198336	0.251479	-0.113977	-0.198942
-4.47407	-0.934265	1.65106	-0.24668	-0.258356	0.208744	1.28016	-0.968659	-0.249218	0.142435	0.0880075	0.0187506	0.536112	-0.569915	-0.209413	-0.230182	-0.0786167	0.149241	0.283026	-0.0989106	-0.410187	-0.254434	-0.309863	0.161624	0.51376	-0.54078	-0.0913333	-0.399112	-0.190941	0.0993031	-0.117382	1.42981	-0.184198	-0.149693	-0.778747	1.15117	-0.270847	-0.052105	0.290652	-0.150295	0.0248743	-0.680475	0.0603186	-0.382514	0.0389294	-0.00301199	-0.197353	0.250549	-0.115188	-0.200109
-4.47309	-0.932215	1.64683	-0.248619	-0.257458	0.211646	1.27947	-0.970112	-0.25007	0.141798	0.0861293	0.0174939	0.537881	-0.568525	-0.20856	-0.230059	-0.0758346	0.150139	0.283523	-0.100798	-0.409068	-0.254449	-0.311	0.163635	0.514435	-0.540269	-0.0920511	-0.399401	-0.191987	0.0989983	-0.116952	1.42722	-0.182164	-0.150384	-0.778346	1.15149	-0.270178	-0.0536199	0.291159	-0.149728	0.0255067	-0.681728	0.0600351	-0.382268	0.0379623	-0.000882101	-0.196371	0.2496	-0.116414	-0.201256
-4.47211	-0.930177	1.64261	-0.250553	-0.256567	0.21455	1.27874	-0.971559	-0.25093	0.141155	0.0842545	0.016215	0.539618	-0.567132	-0.207691	-0.229943	-0.0730615	0.151035	0.284007	-0.102689	-0.407948	-0.254453	-0.312154	0.16565	0.515119	-0.539753	-0.0927701	-0.399697	-0.193021	0.0986934	-0.116525	1.42461	-0.180133	-0.151055	-0.777931	1.15178	-0.269521	-0.0551322	0.291662	-0.149162	0.0261524	-0.682985	0.0597458	-0.382006	0.0370148	0.00125678	-0.19539	0.24863	-0.117655	-0.202384
-4.47112	-0.92815	1.63838	-0.252483	-0.255684	0.217457	1.27797	-0.973	-0.251797	0.140504	0.0823832	0.0149139	0.541323	-0.565736	-0.206806	-0.229836	-0.0702976	0.151927	0.284477	-0.104585	-0.406824	-0.254445	-0.313323	0.167666	0.515811	-0.53923	-0.0934903	-0.4	-0.194042	0.0983886	-0.116098	1.422	-0.178104	-0.151705	-0.777501	1.15202	-0.268877	-0.0566416	0.292161	-0.148599	0.0268112	-0.684246	0.0594508	-0.381729	0.036087	0.00340442	-0.194409	0.247641	-0.118912	-0.203491
-4.47014	-0.926136	1.63414	-0.254407	-0.254809	0.220366	1.27717	-0.974435	-0.252673	0.139846	0.0805156	0.0135907	0.542996	-0.564339	-0.205904	-0.229736	-0.0675429	0.152817	0.284932	-0.106485	-0.405698	-0.254424	-0.314508	0.169686	0.51651	-0.538701	-0.0942116	-0.400311	-0.195049	0.0980838	-0.115674	1.41937	-0.176077	-0.152334	-0.777057	1.15222	-0.268244	-0.0581483	0.292655	-0.148036	0.0274829	-0.685511	0.0591501	-0.381437	0.0351788	0.00556062	-0.19343	0.246631	-0.120184	-0.204579
-4.46916	-0.924134	1.62991	-0.256326	-0.253942	0.223277	1.27634	-0.975864	-0.253556	0.139181	0.0786517	0.0122455	0.544636	-0.562939	-0.204987	-0.229644	-0.0647974	0.153703	0.285374	-0.108388	-0.40457	-0.254391	-0.315708	0.171707	0.517219	-0.538167	-0.0949342	-0.400628	-0.196042	0.0977792	-0.115252	1.41674	-0.174053	-0.152943	-0.776598	1.15239	-0.267624	-0.0596523	0.293146	-0.147476	0.0281675	-0.68678	0.0588437	-0.381129	0.0342902	0.00772515	-0.192452	0.245603	-0.12147	-0.205647
-4.46818	-0.922144	1.62568	-0.258239	-0.253084	0.226189	1.27547	-0.977287	-0.254447	0.138509	0.0767915	0.0108784	0.546244	-0.561538	-0.204054	-0.229561	-0.0620612	0.154586	0.285802	-0.110294	-0.40344	-0.254345	-0.316924	0.173731	0.517935	-0.537626	-0.095658	-0.400953	-0.197022	0.0974748	-0.114831	1.4141	-0.172031	-0.153531	-0.776126	1.15251	-0.267017	-0.0611534	0.293633	-0.146917	0.0288649	-0.688053	0.0585316	-0.380807	0.0334213	0.00989778	-0.191475	0.244555	-0.122772	-0.206695
-4.46719	-0.920167	1.62144	-0.260147	-0.252235	0.229103	1.27457	-0.978704	-0.255346	0.13783	0.0749353	0.00948966	0.54782	-0.560134	-0.203105	-0.229486	-0.0593344	0.155465	0.286215	-0.112203	-0.402308	-0.254286	-0.318155	0.175756	0.518659	-0.53708	-0.0963831	-0.401285	-0.197988	0.0971709	-0.114413	1.41145	-0.170013	-0.154098	-0.775638	1.15259	-0.266423	-0.0626518	0.294115	-0.14636	0.0295749	-0.68933	0.0582139	-0.38047	0.0325721	0.0120783	-0.1905	0.243488	-0.124089	-0.207724
-4.46621	-0.918203	1.61721	-0.262048	-0.251394	0.232018	1.27363	-0.980114	-0.256252	0.137145	0.0730831	0.00807927	0.549363	-0.558727	-0.202141	-0.229419	-0.0566169	0.156341	0.286615	-0.114115	-0.401174	-0.254215	-0.319402	0.177783	0.519392	-0.536528	-0.0971094	-0.401624	-0.198941	0.0968674	-0.113997	1.40879	-0.167999	-0.154645	-0.775136	1.15263	-0.265841	-0.0641475	0.294593	-0.145805	0.0302975	-0.690611	0.0578906	-0.380118	0.0317426	0.0142665	-0.189527	0.242402	-0.12542	-0.208732
-4.46523	-0.916252	1.61297	-0.263944	-0.250562	0.234933	1.27266	-0.981518	-0.257166	0.136452	0.0712349	0.00664739	0.550874	-0.557319	-0.201162	-0.229361	-0.0539089	0.157212	0.286999	-0.116029	-0.400038	-0.254131	-0.320664	0.179812	0.520133	-0.53597	-0.097837	-0.40197	-0.199879	0.0965644	-0.113584	1.40613	-0.165987	-0.155171	-0.77462	1.15263	-0.265272	-0.0656403	0.295067	-0.145252	0.0310325	-0.691896	0.0575617	-0.379751	0.0309327	0.0164621	-0.188555	0.241297	-0.126766	-0.209721
-4.46424	-0.914314	1.60874	-0.265833	-0.249739	0.23785	1.27166	-0.982915	-0.258088	0.135753	0.069391	0.00519415	0.552352	-0.555909	-0.200167	-0.229312	-0.0512103	0.158079	0.287369	-0.117944	-0.3989	-0.254033	-0.321941	0.181842	0.520882	-0.535407	-0.098566	-0.402323	-0.200803	0.096262	-0.113173	1.40346	-0.16398	-0.155676	-0.774088	1.15259	-0.264717	-0.0671304	0.295536	-0.144701	0.0317798	-0.693184	0.0572272	-0.37937	0.0301426	0.0186649	-0.187585	0.240174	-0.128126	-0.21069
-4.46326	-0.912389	1.6045	-0.267716	-0.248926	0.240766	1.27063	-0.984306	-0.259018	0.135048	0.0675513	0.00371966	0.553798	-0.554496	-0.199157	-0.229271	-0.0485213	0.158942	0.287725	-0.119861	-0.397761	-0.253923	-0.323234	0.183873	0.52164	-0.534838	-0.0992962	-0.402683	-0.201713	0.0959604	-0.112765	1.40078	-0.161977	-0.15616	-0.773542	1.15251	-0.264175	-0.0686178	0.296	-0.144152	0.0325393	-0.694476	0.0568872	-0.378973	0.0293721	0.0208747	-0.186618	0.239033	-0.129501	-0.21164
-4.46228	-0.910478	1.60027	-0.269592	-0.248121	0.243682	1.26956	-0.985691	-0.259955	0.134335	0.0657159	0.00222406	0.555211	-0.553081	-0.198133	-0.229239	-0.0458418	0.159801	0.288065	-0.121779	-0.39662	-0.253799	-0.324541	0.185905	0.522406	-0.534263	-0.100028	-0.403049	-0.202608	0.0956596	-0.11236	1.39809	-0.159978	-0.156624	-0.772982	1.15238	-0.263646	-0.0701023	0.29646	-0.143605	0.0333108	-0.695771	0.0565417	-0.378562	0.0286213	0.0230913	-0.185653	0.237873	-0.13089	-0.212569
-4.46129	-0.90858	1.59604	-0.271461	-0.247327	0.246599	1.26846	-0.987069	-0.2609	0.133616	0.0638851	0.00070749	0.556591	-0.551665	-0.197094	-0.229216	-0.043172	0.160654	0.288391	-0.123698	-0.395477	-0.253662	-0.325864	0.187938	0.52318	-0.533684	-0.100761	-0.403423	-0.20349	0.0953597	-0.111958	1.39539	-0.157983	-0.157066	-0.772406	1.15222	-0.263131	-0.0715841	0.296915	-0.14306	0.0340942	-0.69707	0.0561907	-0.378136	0.0278901	0.0253144	-0.18469	0.236696	-0.132293	-0.213479
-4.46031	-0.906695	1.59182	-0.273323	-0.246542	0.249514	1.26733	-0.98844	-0.261853	0.132891	0.0620587	-0.000829929	0.557939	-0.550246	-0.196041	-0.229202	-0.0405117	0.161503	0.288702	-0.125618	-0.394334	-0.253511	-0.327201	0.189972	0.523962	-0.533099	-0.101495	-0.403804	-0.204356	0.0950608	-0.111558	1.39269	-0.155994	-0.157488	-0.771816	1.15202	-0.262629	-0.0730631	0.297365	-0.142517	0.0348894	-0.698372	0.0558343	-0.377695	0.0271786	0.0275437	-0.18373	0.235502	-0.13371	-0.214369
-4.45933	-0.904825	1.5876	-0.275178	-0.245767	0.252429	1.26617	-0.989804	-0.262813	0.132159	0.0602371	-0.00238806	0.559254	-0.548825	-0.194973	-0.229197	-0.0378611	0.162347	0.288997	-0.127537	-0.393189	-0.253347	-0.328554	0.192006	0.524753	-0.532508	-0.102231	-0.404192	-0.205208	0.094763	-0.111162	1.38998	-0.154009	-0.15789	-0.771211	1.15177	-0.262141	-0.0745394	0.29781	-0.141977	0.0356963	-0.699678	0.0554725	-0.37724	0.0264867	0.0297791	-0.182772	0.23429	-0.135141	-0.21524
-4.45834	-0.902969	1.58338	-0.277026	-0.245002	0.255343	1.26498	-0.991161	-0.263781	0.131421	0.0584201	-0.00396676	0.560537	-0.547402	-0.193891	-0.229201	-0.0352202	0.163185	0.289278	-0.129456	-0.392044	-0.253168	-0.329921	0.19404	0.525551	-0.531912	-0.102968	-0.404586	-0.206045	0.0944663	-0.110769	1.38726	-0.152029	-0.15827	-0.77059	1.15149	-0.261667	-0.0760129	0.29825	-0.141439	0.0365148	-0.700986	0.0551054	-0.37677	0.0258144	0.0320203	-0.181818	0.233061	-0.136586	-0.216091
-4.45736	-0.901127	1.57916	-0.278866	-0.244247	0.258256	1.26375	-0.992512	-0.264757	0.130677	0.056608	-0.00556589	0.561787	-0.545977	-0.192795	-0.229215	-0.0325891	0.164018	0.289543	-0.131375	-0.390897	-0.252976	-0.331303	0.196075	0.526358	-0.531312	-0.103707	-0.404987	-0.206868	0.0941709	-0.11038	1.38454	-0.150055	-0.15863	-0.769955	1.15116	-0.261207	-0.0774836	0.298685	-0.140904	0.0373446	-0.702298	0.0547329	-0.376286	0.0251618	0.0342672	-0.180866	0.231815	-0.138045	-0.216922
-4.45638	-0.899299	1.57495	-0.280698	-0.243502	0.261167	1.2625	-0.993855	-0.26574	0.129926	0.0548008	-0.0071853	0.563004	-0.54455	-0.191686	-0.229238	-0.0299676	0.164846	0.289792	-0.133293	-0.38975	-0.25277	-0.332699	0.198109	0.527174	-0.530706	-0.104447	-0.405395	-0.207675	0.0938769	-0.109994	1.38181	-0.148087	-0.158969	-0.769305	1.1508	-0.260761	-0.0789516	0.299115	-0.140371	0.0381856	-0.703613	0.0543551	-0.375788	0.0245287	0.0365193	-0.179918	0.230552	-0.139517	-0.217734
-4.4554	-0.897486	1.57075	-0.282522	-0.242768	0.264077	1.26122	-0.995192	-0.26673	0.12917	0.0529985	-0.00882487	0.564188	-0.543121	-0.190563	-0.229271	-0.027356	0.165667	0.290027	-0.135209	-0.388602	-0.25255	-0.33411	0.200144	0.527997	-0.530095	-0.105188	-0.40581	-0.208468	0.0935843	-0.109611	1.37907	-0.146124	-0.159287	-0.76864	1.15039	-0.260329	-0.0804168	0.29954	-0.139841	0.0390378	-0.704931	0.0539721	-0.375275	0.0239151	0.0387766	-0.178973	0.229273	-0.141002	-0.218526
-4.45441	-0.895688	1.56655	-0.284338	-0.242045	0.266984	1.2599	-0.996521	-0.267728	0.128407	0.0512014	-0.0104844	0.56534	-0.54169	-0.189427	-0.229313	-0.0247541	0.166483	0.290245	-0.137124	-0.387453	-0.252316	-0.335536	0.202178	0.528829	-0.529479	-0.105931	-0.406231	-0.209245	0.0932932	-0.109232	1.37633	-0.144167	-0.159585	-0.767959	1.14994	-0.259912	-0.0818793	0.29996	-0.139313	0.039901	-0.706252	0.0535838	-0.374748	0.0233211	0.0410387	-0.178032	0.227978	-0.142501	-0.219298
-4.45343	-0.893904	1.56236	-0.286146	-0.241332	0.269889	1.25856	-0.997843	-0.268734	0.127638	0.0494095	-0.0121638	0.566459	-0.540258	-0.188277	-0.229365	-0.0221621	0.167293	0.290448	-0.139036	-0.386304	-0.252067	-0.336976	0.204212	0.529669	-0.528858	-0.106676	-0.406659	-0.210007	0.0930038	-0.108857	1.37358	-0.142217	-0.159862	-0.767264	1.14945	-0.259509	-0.083339	0.300374	-0.138788	0.040775	-0.707575	0.0531904	-0.374206	0.0227465	0.0433054	-0.177094	0.226667	-0.144013	-0.220051
-4.45245	-0.892135	1.55817	-0.287945	-0.24063	0.272791	1.25719	-0.999158	-0.269747	0.126863	0.0476228	-0.0138629	0.567545	-0.538823	-0.187114	-0.229427	-0.0195799	0.168096	0.290635	-0.140947	-0.385155	-0.251804	-0.33843	0.206244	0.530518	-0.528233	-0.107422	-0.407093	-0.210754	0.092716	-0.108486	1.37082	-0.140273	-0.160118	-0.766553	1.14893	-0.25912	-0.084796	0.300783	-0.138266	0.0416596	-0.708902	0.0527919	-0.373651	0.0221914	0.0455765	-0.176161	0.22534	-0.145538	-0.220785
-4.45146	-0.890382	1.55399	-0.289735	-0.239939	0.275691	1.25579	-1.00047	-0.270768	0.126082	0.0458415	-0.0155816	0.568598	-0.537386	-0.185939	-0.229498	-0.0170075	0.168893	0.290806	-0.142854	-0.384006	-0.251527	-0.339898	0.208276	0.531374	-0.527603	-0.10817	-0.407534	-0.211485	0.0924301	-0.108119	1.36806	-0.138336	-0.160354	-0.765827	1.14836	-0.258746	-0.0862502	0.301187	-0.137747	0.0425548	-0.710231	0.0523883	-0.373081	0.0216557	0.0478518	-0.175231	0.223998	-0.147076	-0.221499
-4.45048	-0.888643	1.54982	-0.291517	-0.23926	0.278588	1.25436	-1.00177	-0.271796	0.125295	0.0440656	-0.0173196	0.569619	-0.535947	-0.184751	-0.22958	-0.0144451	0.169683	0.290962	-0.144759	-0.382856	-0.251235	-0.341381	0.210307	0.532238	-0.526968	-0.108919	-0.407981	-0.212201	0.092146	-0.107756	1.3653	-0.136405	-0.160569	-0.765086	1.14775	-0.258387	-0.0877017	0.301585	-0.13723	0.0434604	-0.711563	0.0519796	-0.372498	0.0211394	0.050131	-0.174306	0.22264	-0.148627	-0.222194
-4.4495	-0.88692	1.54566	-0.29329	-0.238591	0.281481	1.25291	-1.00306	-0.272832	0.124503	0.0422952	-0.0190769	0.570606	-0.534506	-0.183551	-0.229672	-0.0118925	0.170466	0.291101	-0.14666	-0.381707	-0.250928	-0.342877	0.212337	0.533111	-0.526329	-0.10967	-0.408435	-0.212902	0.0918639	-0.107397	1.36253	-0.134482	-0.160764	-0.764329	1.1471	-0.258042	-0.0891505	0.301978	-0.136717	0.0443762	-0.712897	0.051566	-0.3719	0.0206425	0.0524138	-0.173385	0.221267	-0.15019	-0.222869
-4.44851	-0.885212	1.5415	-0.295053	-0.237935	0.284371	1.25142	-1.00434	-0.273875	0.123704	0.0405305	-0.0208533	0.571561	-0.533064	-0.182338	-0.229774	-0.00934974	0.171243	0.291224	-0.148558	-0.380558	-0.250607	-0.344388	0.214366	0.533992	-0.525685	-0.110422	-0.408895	-0.213587	0.0915839	-0.107043	1.35975	-0.132566	-0.160938	-0.763557	1.14641	-0.257713	-0.0905965	0.302365	-0.136207	0.0453021	-0.714234	0.0511474	-0.371289	0.0201648	0.0547	-0.172468	0.219879	-0.151766	-0.223526
-4.44753	-0.88352	1.53736	-0.296807	-0.237289	0.287257	1.24991	-1.00562	-0.274926	0.1229	0.0387714	-0.0226486	0.572483	-0.531619	-0.181113	-0.229886	-0.00681692	0.172012	0.291331	-0.150451	-0.379409	-0.250271	-0.345912	0.216393	0.534881	-0.525037	-0.111176	-0.409361	-0.214256	0.091306	-0.106693	1.35697	-0.130657	-0.161092	-0.76277	1.14568	-0.257398	-0.0920398	0.302746	-0.1357	0.0462379	-0.715573	0.0507238	-0.370664	0.0197064	0.0569894	-0.171557	0.218477	-0.153354	-0.224163
-4.44655	-0.881844	1.53322	-0.298552	-0.236656	0.290139	1.24837	-1.00689	-0.275983	0.122091	0.0370181	-0.0244626	0.573373	-0.530172	-0.179876	-0.230008	-0.00429401	0.172774	0.291421	-0.15234	-0.378261	-0.249919	-0.34745	0.218418	0.535778	-0.524385	-0.111931	-0.409833	-0.21491	0.0910303	-0.106347	1.35418	-0.128756	-0.161225	-0.761968	1.14491	-0.257099	-0.0934804	0.303122	-0.135196	0.0471835	-0.716914	0.0502955	-0.370025	0.0192672	0.0592817	-0.17065	0.217061	-0.154954	-0.22478
-4.44557	-0.880183	1.52909	-0.300287	-0.236034	0.293017	1.24681	-1.00815	-0.277049	0.121276	0.0352707	-0.0262952	0.57423	-0.528724	-0.178628	-0.230141	-0.00178102	0.173528	0.291495	-0.154224	-0.377113	-0.249553	-0.349002	0.220441	0.536682	-0.523728	-0.112689	-0.410312	-0.215547	0.0907569	-0.106006	1.35139	-0.126863	-0.161338	-0.76115	1.1441	-0.256814	-0.0949182	0.303492	-0.134695	0.0481387	-0.718258	0.0498623	-0.369372	0.0188471	0.0615767	-0.169748	0.21563	-0.156566	-0.225379
-4.44458	-0.878539	1.52498	-0.302012	-0.235424	0.29589	1.24522	-1.00941	-0.278121	0.120455	0.0335293	-0.0281463	0.575054	-0.527274	-0.177368	-0.230284	0.000722061	0.174275	0.291552	-0.156104	-0.375966	-0.249172	-0.350567	0.222462	0.537595	-0.523067	-0.113448	-0.410796	-0.216169	0.0904859	-0.10567	1.3486	-0.124978	-0.16143	-0.760317	1.14326	-0.256545	-0.0963534	0.303856	-0.134198	0.0491033	-0.719603	0.0494244	-0.368706	0.0184461	0.0638741	-0.168851	0.214186	-0.158191	-0.225959
-4.4436	-0.876911	1.52087	-0.303727	-0.234826	0.298758	1.2436	-1.01065	-0.279201	0.11963	0.0317938	-0.0300156	0.575845	-0.525821	-0.176097	-0.230438	0.00321522	0.175014	0.291593	-0.157977	-0.37482	-0.248775	-0.352146	0.224482	0.538516	-0.522403	-0.114208	-0.411286	-0.216775	0.0902175	-0.105339	1.3458	-0.123102	-0.161503	-0.759468	1.14237	-0.256291	-0.0977858	0.304214	-0.133704	0.0500772	-0.720951	0.0489818	-0.368027	0.0180642	0.0661737	-0.167959	0.212728	-0.159827	-0.226519
-4.44262	-0.875299	1.51678	-0.305432	-0.234241	0.301622	1.24196	-1.01189	-0.280288	0.118798	0.0300645	-0.0319029	0.576603	-0.524367	-0.174815	-0.230602	0.00569846	0.175745	0.291617	-0.159845	-0.373675	-0.248363	-0.353738	0.226499	0.539445	-0.521734	-0.11497	-0.411783	-0.217365	0.0899515	-0.105012	1.343	-0.121233	-0.161555	-0.758604	1.14144	-0.256053	-0.0992156	0.304566	-0.133214	0.0510602	-0.722301	0.0485345	-0.367334	0.0177013	0.0684751	-0.167073	0.211256	-0.161475	-0.227061
-4.44163	-0.873703	1.5127	-0.307127	-0.233667	0.30448	1.24029	-1.01312	-0.281382	0.117962	0.0283413	-0.0338082	0.577329	-0.522911	-0.173521	-0.230777	0.00817179	0.176467	0.291624	-0.161706	-0.372532	-0.247936	-0.355343	0.228513	0.540381	-0.521062	-0.115734	-0.412285	-0.217938	0.0896883	-0.104691	1.34019	-0.119374	-0.161587	-0.757724	1.14047	-0.25583	-0.100643	0.304913	-0.132727	0.0520521	-0.723652	0.0480826	-0.366628	0.0173572	0.0707783	-0.166193	0.209771	-0.163134	-0.227584
-4.44065	-0.872124	1.50863	-0.308811	-0.233106	0.307332	1.2386	-1.01435	-0.282484	0.11712	0.0266245	-0.0357313	0.578022	-0.521454	-0.172218	-0.230963	0.0106352	0.177182	0.291615	-0.163561	-0.371389	-0.247493	-0.356961	0.230525	0.541325	-0.520385	-0.1165	-0.412793	-0.218496	0.0894277	-0.104374	1.33738	-0.117523	-0.161599	-0.756829	1.13946	-0.255623	-0.102067	0.305253	-0.132245	0.0530529	-0.725006	0.0476261	-0.365909	0.0170321	0.0730829	-0.165318	0.208274	-0.164805	-0.228088
-4.43967	-0.870562	1.50457	-0.310484	-0.232558	0.310179	1.23689	-1.01556	-0.283592	0.116273	0.0249139	-0.0376719	0.578683	-0.519994	-0.170903	-0.231159	0.0130887	0.177887	0.291588	-0.165409	-0.370248	-0.247034	-0.358592	0.232533	0.542277	-0.519705	-0.117268	-0.413306	-0.219037	0.08917	-0.104063	1.33457	-0.115681	-0.161591	-0.755919	1.13842	-0.255431	-0.103489	0.305588	-0.131765	0.0540622	-0.726361	0.0471652	-0.365177	0.0167257	0.0753886	-0.16445	0.206764	-0.166486	-0.228573
-4.43868	-0.869016	1.50053	-0.312146	-0.232023	0.31302	1.23515	-1.01677	-0.284708	0.115421	0.0232098	-0.0396299	0.579311	-0.518532	-0.169579	-0.231367	0.0155323	0.178584	0.291545	-0.16725	-0.369108	-0.24656	-0.360236	0.234539	0.543237	-0.519022	-0.118037	-0.413825	-0.219562	0.0889151	-0.103757	1.33175	-0.113848	-0.161563	-0.754993	1.13733	-0.255255	-0.104908	0.305916	-0.13129	0.05508	-0.727718	0.0466998	-0.364432	0.0164381	0.0776953	-0.163587	0.205241	-0.168179	-0.22904
-4.4377	-0.867488	1.4965	-0.313798	-0.2315	0.315854	1.23338	-1.01796	-0.285831	0.114564	0.0215122	-0.0416051	0.579906	-0.517069	-0.168244	-0.231585	0.017966	0.179273	0.291484	-0.169083	-0.36797	-0.246071	-0.361893	0.236542	0.544204	-0.518335	-0.118808	-0.41435	-0.220071	0.0886633	-0.103457	1.32894	-0.112024	-0.161515	-0.754051	1.13621	-0.255095	-0.106324	0.306239	-0.130818	0.056106	-0.729076	0.0462301	-0.363674	0.0161691	0.0800026	-0.162731	0.203706	-0.169883	-0.229488
-4.43672	-0.865976	1.49249	-0.315438	-0.23099	0.318682	1.2316	-1.01915	-0.286961	0.113702	0.0198212	-0.0435973	0.580469	-0.515604	-0.1669	-0.231814	0.0203898	0.179952	0.291406	-0.170909	-0.366834	-0.245565	-0.363562	0.238542	0.545179	-0.517644	-0.11958	-0.41488	-0.220564	0.0884145	-0.103162	1.32611	-0.11021	-0.161447	-0.753094	1.13504	-0.254951	-0.107738	0.306555	-0.130351	0.0571402	-0.730436	0.045756	-0.362903	0.0159187	0.0823103	-0.161881	0.202159	-0.171598	-0.229917
-4.43574	-0.864481	1.48849	-0.317067	-0.230493	0.321504	1.22979	-1.02034	-0.288098	0.112836	0.0181369	-0.0456064	0.581	-0.514137	-0.165545	-0.232055	0.0228038	0.180622	0.291311	-0.172725	-0.365699	-0.245044	-0.365244	0.240538	0.546161	-0.51695	-0.120355	-0.415415	-0.22104	0.0881688	-0.102872	1.32329	-0.108406	-0.16136	-0.752121	1.13384	-0.254822	-0.109149	0.306865	-0.129887	0.0581822	-0.731797	0.0452776	-0.362119	0.0156869	0.0846182	-0.161038	0.200601	-0.173323	-0.230328
-4.43475	-0.863004	1.4845	-0.318685	-0.230009	0.324318	1.22796	-1.02151	-0.289242	0.111964	0.0164593	-0.0476321	0.581498	-0.512668	-0.164182	-0.232306	0.0252079	0.181283	0.291199	-0.174534	-0.364567	-0.244507	-0.366938	0.24253	0.547151	-0.516254	-0.121131	-0.415955	-0.221499	0.0879263	-0.102588	1.32046	-0.106611	-0.161253	-0.751133	1.1326	-0.25471	-0.110557	0.307169	-0.129428	0.059232	-0.733159	0.044795	-0.361323	0.0154734	0.086926	-0.160201	0.199031	-0.175058	-0.230721
-4.43377	-0.861544	1.48053	-0.320291	-0.229538	0.327125	1.22611	-1.02267	-0.290393	0.111088	0.0147885	-0.0496743	0.581963	-0.511197	-0.162809	-0.232569	0.0276021	0.181934	0.291069	-0.176333	-0.363437	-0.243954	-0.368645	0.244519	0.548148	-0.515553	-0.121909	-0.416501	-0.221943	0.0876872	-0.10231	1.31763	-0.104827	-0.161126	-0.750129	1.13132	-0.254613	-0.111963	0.307466	-0.128973	0.0602893	-0.734523	0.0443083	-0.360515	0.0152784	0.0892334	-0.159372	0.19745	-0.176804	-0.231095
-4.43279	-0.860101	1.47658	-0.321885	-0.229081	0.329925	1.22423	-1.02383	-0.291551	0.110207	0.0131246	-0.0517328	0.582396	-0.509725	-0.161427	-0.232843	0.0299865	0.182575	0.290922	-0.178123	-0.36231	-0.243385	-0.370364	0.246504	0.549153	-0.51485	-0.122689	-0.417052	-0.222369	0.0874514	-0.102037	1.3148	-0.103052	-0.16098	-0.749109	1.13	-0.254533	-0.113366	0.307757	-0.128522	0.061354	-0.735888	0.0438175	-0.359694	0.0151016	0.0915402	-0.158549	0.195857	-0.17856	-0.231451
-4.4318	-0.858676	1.47265	-0.323467	-0.228637	0.332717	1.22234	-1.02498	-0.292716	0.109322	0.0114676	-0.0538073	0.582797	-0.508251	-0.160036	-0.233128	0.0323611	0.183207	0.290757	-0.179903	-0.361184	-0.242799	-0.372095	0.248485	0.550165	-0.514144	-0.123471	-0.417607	-0.222779	0.087219	-0.101771	1.31197	-0.101288	-0.160814	-0.748074	1.12864	-0.254469	-0.114767	0.308042	-0.128075	0.0624259	-0.737254	0.0433227	-0.358861	0.014943	0.0938462	-0.157734	0.194254	-0.180326	-0.231789
-4.43082	-0.857269	1.46873	-0.325037	-0.228206	0.335502	1.22042	-1.02612	-0.293887	0.108432	0.00981766	-0.0558978	0.583166	-0.506775	-0.158636	-0.233425	0.0347259	0.183829	0.290575	-0.181673	-0.360062	-0.242198	-0.373837	0.250461	0.551184	-0.513435	-0.124254	-0.418168	-0.223173	0.0869902	-0.10151	1.30914	-0.0995345	-0.160629	-0.747024	1.12724	-0.254421	-0.116164	0.308321	-0.127633	0.0635048	-0.738621	0.0428238	-0.358015	0.0148025	0.096151	-0.156926	0.192641	-0.182101	-0.232109
-4.42984	-0.855879	1.46482	-0.326595	-0.227789	0.338278	1.21848	-1.02725	-0.295066	0.107537	0.00817482	-0.058004	0.583502	-0.505297	-0.157228	-0.233733	0.037081	0.18444	0.290374	-0.183433	-0.358942	-0.24158	-0.375592	0.252433	0.55221	-0.512724	-0.12504	-0.418733	-0.223549	0.0867649	-0.101255	1.3063	-0.0977914	-0.160426	-0.745957	1.12581	-0.254389	-0.11756	0.308594	-0.127196	0.0645905	-0.739989	0.0423211	-0.357158	0.01468	0.0984545	-0.156125	0.191017	-0.183887	-0.232411
-4.42885	-0.854507	1.46094	-0.328141	-0.227386	0.341046	1.21653	-1.02837	-0.296251	0.106638	0.00653916	-0.0601257	0.583806	-0.503818	-0.155812	-0.234053	0.0394263	0.185042	0.290157	-0.185182	-0.357825	-0.240946	-0.377358	0.254401	0.553243	-0.51201	-0.125827	-0.419303	-0.223909	0.0865434	-0.101007	1.30346	-0.0960591	-0.160202	-0.744876	1.12434	-0.254373	-0.118952	0.308859	-0.126763	0.0656829	-0.741357	0.0418145	-0.356289	0.0145755	0.100756	-0.155333	0.189384	-0.185682	-0.232696
-4.42787	-0.853153	1.45708	-0.329674	-0.226997	0.343805	1.21455	-1.02948	-0.297443	0.105735	0.00491074	-0.0622628	0.584078	-0.502337	-0.154388	-0.234384	0.0417618	0.185633	0.289921	-0.18692	-0.356711	-0.240296	-0.379136	0.256364	0.554283	-0.511293	-0.126616	-0.419877	-0.224253	0.0863255	-0.100764	1.30063	-0.0943378	-0.15996	-0.743778	1.12283	-0.254374	-0.120342	0.309119	-0.126334	0.0667817	-0.742726	0.0413042	-0.355408	0.0144888	0.103056	-0.154547	0.18774	-0.187486	-0.232962
-4.42689	-0.851817	1.45323	-0.331195	-0.226621	0.346556	1.21255	-1.03059	-0.298642	0.104828	0.00328964	-0.0644149	0.584318	-0.500854	-0.152956	-0.234726	0.0440877	0.186213	0.289667	-0.188647	-0.3556	-0.23963	-0.380925	0.258323	0.55533	-0.510574	-0.127407	-0.420456	-0.224579	0.0861115	-0.100528	1.29779	-0.0926275	-0.159699	-0.742665	1.12128	-0.254391	-0.12173	0.309372	-0.125911	0.0678867	-0.744096	0.0407901	-0.354515	0.0144199	0.105354	-0.15377	0.186087	-0.189299	-0.233211
-4.4259	-0.8505	1.4494	-0.332702	-0.226259	0.349297	1.21054	-1.03169	-0.299847	0.103916	0.00167591	-0.066582	0.584526	-0.499369	-0.151516	-0.23508	0.0464039	0.186783	0.289396	-0.190362	-0.354493	-0.238946	-0.382725	0.260276	0.556384	-0.509853	-0.1282	-0.421039	-0.224889	0.0859014	-0.100298	1.29495	-0.0909284	-0.159419	-0.741537	1.11969	-0.254425	-0.123115	0.309619	-0.125492	0.0689978	-0.745467	0.0402724	-0.35361	0.0143686	0.10765	-0.153001	0.184425	-0.191121	-0.233442
-4.42492	-0.8492	1.44559	-0.334197	-0.225911	0.35203	1.20851	-1.03277	-0.301059	0.103	6.96265e-05	-0.0687638	0.584702	-0.497882	-0.150069	-0.235446	0.0487104	0.187341	0.289106	-0.192064	-0.353389	-0.238247	-0.384537	0.262224	0.557445	-0.509129	-0.128994	-0.421627	-0.225182	0.0856953	-0.100074	1.29211	-0.0892406	-0.159121	-0.740392	1.11807	-0.254475	-0.124497	0.309859	-0.125078	0.0701148	-0.746838	0.039751	-0.352695	0.0143349	0.109942	-0.152241	0.182754	-0.192952	-0.233656
-4.42394	-0.847919	1.44181	-0.335679	-0.225578	0.354753	1.20646	-1.03385	-0.302277	0.102081	-0.00152914	-0.0709601	0.584846	-0.496394	-0.148615	-0.235823	0.0510074	0.187889	0.288798	-0.193755	-0.352288	-0.237531	-0.386359	0.264167	0.558512	-0.508403	-0.129791	-0.422218	-0.225459	0.0854931	-0.0998572	1.28927	-0.0875644	-0.158804	-0.739233	1.11641	-0.254541	-0.125877	0.310093	-0.124669	0.0712375	-0.748209	0.0392262	-0.351767	0.0143187	0.112232	-0.151489	0.181074	-0.194792	-0.233852
-4.42296	-0.846656	1.43804	-0.337147	-0.225258	0.357466	1.20439	-1.03492	-0.303502	0.101157	-0.00312033	-0.0731707	0.584958	-0.494905	-0.147154	-0.236212	0.0532947	0.188425	0.288473	-0.195432	-0.351192	-0.236798	-0.388192	0.266105	0.559586	-0.507675	-0.130589	-0.422814	-0.225718	0.0852951	-0.0996465	1.28644	-0.0858998	-0.158468	-0.738057	1.11471	-0.254624	-0.127254	0.31032	-0.124265	0.0723656	-0.749581	0.0386979	-0.350829	0.0143198	0.114519	-0.150745	0.179385	-0.19664	-0.234031
-4.42197	-0.845412	1.43429	-0.338602	-0.224953	0.360169	1.20231	-1.03598	-0.304733	0.100229	-0.00470388	-0.0753955	0.585038	-0.493413	-0.145686	-0.236613	0.0555725	0.18895	0.288129	-0.197096	-0.350099	-0.236049	-0.390036	0.268037	0.560666	-0.506946	-0.131389	-0.423413	-0.225961	0.0851012	-0.0994423	1.2836	-0.0842469	-0.158114	-0.736866	1.11298	-0.254723	-0.128629	0.310541	-0.123867	0.0734991	-0.750953	0.0381662	-0.349879	0.0143382	0.116802	-0.15001	0.177688	-0.198496	-0.234193
-4.42099	-0.844186	1.43057	-0.340044	-0.224662	0.362863	1.20021	-1.03703	-0.305971	0.0992981	-0.00627972	-0.0776341	0.585087	-0.49192	-0.144212	-0.237026	0.0578408	0.189464	0.287766	-0.198747	-0.34901	-0.235283	-0.391891	0.269964	0.561752	-0.506214	-0.132192	-0.424017	-0.226187	0.0849116	-0.0992448	1.28076	-0.0826059	-0.157742	-0.73566	1.11121	-0.254839	-0.130001	0.310755	-0.123473	0.0746376	-0.752325	0.0376312	-0.348919	0.0143737	0.119082	-0.149284	0.175983	-0.200361	-0.234338
-4.42001	-0.842979	1.42687	-0.341472	-0.224385	0.365546	1.19809	-1.03807	-0.307215	0.098363	-0.00784779	-0.0798865	0.585104	-0.490425	-0.142731	-0.23745	0.0600996	0.189966	0.287386	-0.200385	-0.347925	-0.234501	-0.393756	0.271885	0.562845	-0.505481	-0.132996	-0.424624	-0.226396	0.0847263	-0.0990539	1.27793	-0.080977	-0.157352	-0.734438	1.1094	-0.254972	-0.131371	0.310963	-0.123085	0.0757811	-0.753697	0.0370929	-0.347948	0.0144262	0.121357	-0.148566	0.17427	-0.202233	-0.234466
-4.41902	-0.841791	1.42319	-0.342887	-0.224123	0.368218	1.19596	-1.0391	-0.308466	0.0974242	-0.00940803	-0.0821523	0.58509	-0.488929	-0.141244	-0.237887	0.0623489	0.190456	0.286987	-0.202008	-0.346844	-0.233702	-0.395632	0.2738	0.563944	-0.504746	-0.133802	-0.425234	-0.226588	0.0845453	-0.0988698	1.27509	-0.0793602	-0.156943	-0.733201	1.10756	-0.255121	-0.132738	0.311164	-0.122702	0.0769292	-0.755069	0.0365515	-0.346965	0.0144957	0.123629	-0.147858	0.172549	-0.204113	-0.234577
-4.41804	-0.840621	1.41953	-0.344288	-0.223875	0.37088	1.19381	-1.04013	-0.309723	0.0964819	-0.0109604	-0.0844314	0.585044	-0.48743	-0.139752	-0.238335	0.0645888	0.190934	0.28657	-0.203616	-0.345768	-0.232886	-0.397517	0.275708	0.565049	-0.50401	-0.134609	-0.425848	-0.226763	0.0843688	-0.0986924	1.27226	-0.0777557	-0.156517	-0.731948	1.10568	-0.255287	-0.134103	0.311359	-0.122325	0.0780818	-0.756441	0.0360069	-0.345973	0.014582	0.125896	-0.14716	0.170822	-0.206001	-0.234671
-4.41706	-0.83947	1.4159	-0.345674	-0.223642	0.373531	1.19165	-1.04114	-0.310985	0.095536	-0.0125048	-0.0867235	0.584967	-0.485931	-0.138253	-0.238795	0.0668194	0.191401	0.286134	-0.20521	-0.344697	-0.232053	-0.399413	0.277611	0.56616	-0.503273	-0.135419	-0.426465	-0.226921	0.0841967	-0.0985219	1.26942	-0.0761635	-0.156073	-0.730679	1.10376	-0.255469	-0.135465	0.311547	-0.121953	0.0792388	-0.757812	0.0354593	-0.34497	0.0146851	0.128158	-0.14647	0.169087	-0.207896	-0.234748
-4.41607	-0.838338	1.41228	-0.347047	-0.223424	0.376171	1.18947	-1.04214	-0.312255	0.0945866	-0.0140412	-0.0890285	0.584859	-0.484429	-0.136749	-0.239266	0.0690406	0.191855	0.28568	-0.206789	-0.34363	-0.231203	-0.401318	0.279507	0.567277	-0.502534	-0.136231	-0.427086	-0.227063	0.0840292	-0.0983582	1.26659	-0.0745839	-0.155611	-0.729395	1.10181	-0.255668	-0.136825	0.311729	-0.121586	0.0803998	-0.759184	0.0349087	-0.343956	0.0148047	0.130415	-0.14579	0.167345	-0.209799	-0.23481
-4.41509	-0.837226	1.4087	-0.348405	-0.22322	0.3788	1.18728	-1.04314	-0.31353	0.0936338	-0.0155695	-0.0913462	0.584719	-0.482926	-0.13524	-0.23975	0.0712525	0.192297	0.285207	-0.208352	-0.342568	-0.230337	-0.403233	0.281397	0.5684	-0.501794	-0.137044	-0.42771	-0.227188	0.0838663	-0.0982015	1.26377	-0.073017	-0.155132	-0.728096	1.09982	-0.255884	-0.138182	0.311904	-0.121226	0.0815647	-0.760554	0.0343552	-0.342932	0.0149408	0.132667	-0.14512	0.165596	-0.211708	-0.234854
-4.41411	-0.836132	1.40514	-0.349749	-0.22303	0.381417	1.18508	-1.04413	-0.314811	0.0926778	-0.0170897	-0.0936762	0.584548	-0.481422	-0.133726	-0.240246	0.0734551	0.192726	0.284716	-0.209899	-0.34151	-0.229454	-0.405158	0.28328	0.569529	-0.501053	-0.137859	-0.428336	-0.227295	0.0837081	-0.0980518	1.26094	-0.0714627	-0.154636	-0.726781	1.0978	-0.256116	-0.139536	0.312072	-0.120871	0.0827334	-0.761925	0.0337989	-0.341898	0.0150933	0.134914	-0.14446	0.163841	-0.213625	-0.234883
-4.41313	-0.835058	1.4016	-0.351079	-0.222856	0.384023	1.18286	-1.0451	-0.316098	0.0917185	-0.0186017	-0.0960185	0.584346	-0.479915	-0.132207	-0.240754	0.0756485	0.193143	0.284206	-0.211431	-0.340458	-0.228554	-0.407092	0.285157	0.570663	-0.500311	-0.138676	-0.428966	-0.227386	0.0835547	-0.097909	1.25812	-0.0699214	-0.154122	-0.725451	1.09574	-0.256365	-0.140889	0.312234	-0.120522	0.0839055	-0.763295	0.0332398	-0.340855	0.015262	0.137155	-0.14381	0.16208	-0.215548	-0.234895
-4.41214	-0.834002	1.39809	-0.352394	-0.222696	0.386616	1.18063	-1.04607	-0.317391	0.090756	-0.0201054	-0.0983727	0.584113	-0.478408	-0.130683	-0.241273	0.0778328	0.193547	0.283677	-0.212946	-0.339411	-0.227637	-0.409035	0.287027	0.571802	-0.499569	-0.139495	-0.429598	-0.22746	0.083406	-0.0977734	1.25529	-0.0683929	-0.153591	-0.724106	1.09365	-0.256631	-0.142239	0.31239	-0.120178	0.0850809	-0.764664	0.0326781	-0.339801	0.0154469	0.13939	-0.14317	0.160313	-0.217477	-0.234891
-4.41116	-0.832966	1.3946	-0.353695	-0.222551	0.389198	1.17838	-1.04702	-0.31869	0.0897904	-0.0216009	-0.100739	0.583849	-0.476898	-0.129155	-0.241805	0.0800079	0.193938	0.28313	-0.214444	-0.33837	-0.226703	-0.410988	0.28889	0.572947	-0.498826	-0.140316	-0.430233	-0.227518	0.0832621	-0.0976448	1.25248	-0.0668776	-0.153044	-0.722745	1.09152	-0.256913	-0.143586	0.312538	-0.119841	0.0862593	-0.766032	0.0321137	-0.338738	0.0156478	0.141618	-0.14254	0.15854	-0.219413	-0.234872
-4.41018	-0.831949	1.39114	-0.35498	-0.222421	0.391767	1.17613	-1.04797	-0.319995	0.0888218	-0.0230881	-0.103116	0.583555	-0.475388	-0.127623	-0.242349	0.082174	0.194316	0.282564	-0.215925	-0.337334	-0.225752	-0.412949	0.290745	0.574097	-0.498082	-0.141139	-0.430871	-0.227558	0.0831232	-0.0975234	1.24966	-0.0653755	-0.152479	-0.721369	1.08936	-0.257212	-0.144931	0.312681	-0.11951	0.0874407	-0.7674	0.0315468	-0.337665	0.0158645	0.143841	-0.14192	0.156762	-0.221355	-0.234836
-4.40919	-0.830952	1.3877	-0.356251	-0.222306	0.394324	1.17387	-1.04891	-0.321305	0.0878503	-0.0245668	-0.105505	0.58323	-0.473875	-0.126086	-0.242905	0.084331	0.194681	0.281979	-0.217389	-0.336303	-0.224784	-0.41492	0.292594	0.575252	-0.497337	-0.141963	-0.43151	-0.227582	0.0829892	-0.0974092	1.24685	-0.0638866	-0.151898	-0.719978	1.08716	-0.257527	-0.146273	0.312816	-0.119185	0.0886247	-0.768766	0.0309774	-0.336583	0.016097	0.146056	-0.141311	0.154978	-0.223303	-0.234785
-4.40821	-0.829974	1.3843	-0.357507	-0.222206	0.396868	1.17159	-1.04984	-0.322621	0.0868758	-0.0260371	-0.107905	0.582874	-0.472361	-0.124546	-0.243472	0.086479	0.195033	0.281375	-0.218835	-0.335279	-0.223799	-0.416899	0.294435	0.576412	-0.496593	-0.14279	-0.432152	-0.227588	0.0828602	-0.0973022	1.24404	-0.0624111	-0.1513	-0.718571	1.08493	-0.25786	-0.147613	0.312945	-0.118866	0.0898111	-0.770132	0.0304056	-0.335491	0.0163452	0.148265	-0.140713	0.15319	-0.225257	-0.234718
-4.40723	-0.829015	1.38092	-0.358748	-0.222121	0.3994	1.1693	-1.05076	-0.323943	0.0858986	-0.0274989	-0.110316	0.582487	-0.470846	-0.123003	-0.244052	0.0886181	0.195371	0.280752	-0.220263	-0.33426	-0.222798	-0.418886	0.296268	0.577577	-0.495848	-0.143618	-0.432796	-0.227578	0.0827363	-0.0972024	1.24124	-0.060949	-0.150686	-0.717149	1.08267	-0.258208	-0.148951	0.313068	-0.118553	0.0909998	-0.771496	0.0298315	-0.33439	0.0166088	0.150466	-0.140125	0.151397	-0.227216	-0.234636
-4.40624	-0.828076	1.37756	-0.359973	-0.222051	0.401918	1.167	-1.05166	-0.325271	0.0849186	-0.0289522	-0.112737	0.582071	-0.469329	-0.121456	-0.244644	0.0907483	0.195696	0.280111	-0.221673	-0.333247	-0.221779	-0.420882	0.298094	0.578746	-0.495103	-0.144448	-0.433442	-0.227552	0.0826175	-0.0971099	1.23844	-0.0595006	-0.150056	-0.715712	1.08037	-0.258574	-0.150286	0.313184	-0.118247	0.0921906	-0.772859	0.0292551	-0.333281	0.0168878	0.152659	-0.139548	0.149599	-0.229181	-0.234539
-4.40526	-0.827157	1.37424	-0.361183	-0.221996	0.404423	1.1647	-1.05256	-0.326603	0.083936	-0.0303968	-0.115169	0.581624	-0.467811	-0.119905	-0.245248	0.0928696	0.196008	0.27945	-0.223065	-0.332241	-0.220744	-0.422886	0.299913	0.579921	-0.494358	-0.145279	-0.43409	-0.227508	0.0825039	-0.0970247	1.23564	-0.0580658	-0.14941	-0.71426	1.07804	-0.258956	-0.151619	0.313294	-0.117947	0.0933832	-0.774221	0.0286766	-0.332162	0.0171821	0.154845	-0.138982	0.147796	-0.231151	-0.234427
-4.40428	-0.826257	1.37094	-0.362378	-0.221956	0.406915	1.16238	-1.05345	-0.327942	0.0829508	-0.0318329	-0.117611	0.581147	-0.466291	-0.118352	-0.245864	0.0949822	0.196306	0.278771	-0.224437	-0.33124	-0.219691	-0.424898	0.301723	0.581099	-0.493613	-0.146113	-0.43474	-0.227448	0.0823954	-0.0969469	1.23285	-0.0566447	-0.148748	-0.712792	1.07567	-0.259354	-0.15295	0.313397	-0.117653	0.0945774	-0.775582	0.0280959	-0.331035	0.0174914	0.157023	-0.138428	0.14599	-0.233126	-0.234299
-4.40329	-0.825377	1.36767	-0.363558	-0.221931	0.409393	1.16006	-1.05433	-0.329285	0.0819631	-0.0332602	-0.120063	0.580639	-0.46477	-0.116797	-0.246492	0.097086	0.19659	0.278072	-0.22579	-0.330247	-0.218622	-0.426918	0.303526	0.582283	-0.492868	-0.146948	-0.435391	-0.227371	0.0822923	-0.0968765	1.23007	-0.0552375	-0.14807	-0.71131	1.07328	-0.259769	-0.154278	0.313493	-0.117366	0.095773	-0.776941	0.0275133	-0.329899	0.0178157	0.159193	-0.137884	0.14418	-0.235106	-0.234157
-4.40231	-0.824516	1.36444	-0.364721	-0.221921	0.411858	1.15772	-1.0552	-0.330634	0.0809729	-0.0346789	-0.122524	0.580102	-0.463247	-0.115238	-0.247132	0.0991811	0.19686	0.277355	-0.227124	-0.329259	-0.217536	-0.428946	0.30532	0.58347	-0.492124	-0.147785	-0.436044	-0.227278	0.0821944	-0.0968134	1.22729	-0.0538442	-0.147376	-0.709813	1.07085	-0.260201	-0.155604	0.313583	-0.117086	0.0969697	-0.778298	0.0269287	-0.328755	0.0181549	0.161354	-0.137352	0.142366	-0.23709	-0.234
-4.40133	-0.823676	1.36123	-0.365869	-0.221927	0.414309	1.15538	-1.05606	-0.331988	0.0799803	-0.0360887	-0.124995	0.579535	-0.461723	-0.113678	-0.247784	0.101268	0.197116	0.276618	-0.228438	-0.328279	-0.216432	-0.430981	0.307107	0.584661	-0.49138	-0.148624	-0.436698	-0.227168	0.0821019	-0.0967577	1.22451	-0.0524649	-0.146667	-0.7083	1.06838	-0.260649	-0.156927	0.313667	-0.116812	0.0981675	-0.779654	0.0263422	-0.327602	0.0185088	0.163507	-0.136832	0.140549	-0.239079	-0.233828
-4.40035	-0.822855	1.35805	-0.367002	-0.221947	0.416746	1.15304	-1.0569	-0.333347	0.0789855	-0.0374898	-0.127476	0.578938	-0.460198	-0.112115	-0.248448	0.103345	0.197357	0.275863	-0.229732	-0.327305	-0.215312	-0.433023	0.308885	0.585857	-0.490637	-0.149464	-0.437353	-0.227041	0.0820147	-0.0967095	1.22174	-0.0510996	-0.145943	-0.706773	1.06589	-0.261113	-0.158248	0.313744	-0.116545	0.0993661	-0.781008	0.025754	-0.326442	0.0188772	0.16565	-0.136323	0.138728	-0.241072	-0.233642
-4.39936	-0.822053	1.3549	-0.368118	-0.221983	0.419168	1.15068	-1.05774	-0.334712	0.0779884	-0.038882	-0.129965	0.578312	-0.458671	-0.11055	-0.249124	0.105415	0.197585	0.275088	-0.231005	-0.326338	-0.214175	-0.435073	0.310654	0.587056	-0.489895	-0.150306	-0.438009	-0.226898	0.081933	-0.0966687	1.21898	-0.0497485	-0.145204	-0.705231	1.06336	-0.261594	-0.159567	0.313815	-0.116285	0.100565	-0.78236	0.025164	-0.325273	0.0192601	0.167785	-0.135826	0.136905	-0.243069	-0.233441
-4.39838	-0.821272	1.35178	-0.369219	-0.222033	0.421576	1.14832	-1.05857	-0.336081	0.0769892	-0.0402653	-0.132463	0.577656	-0.457143	-0.108984	-0.249812	0.107476	0.197798	0.274294	-0.232258	-0.325379	-0.213021	-0.43713	0.312415	0.588259	-0.489153	-0.15115	-0.438666	-0.226738	0.0818568	-0.0966353	1.21622	-0.0484117	-0.14445	-0.703674	1.0608	-0.262092	-0.160883	0.313879	-0.116032	0.101765	-0.78371	0.0245724	-0.324096	0.0196572	0.169909	-0.13534	0.135078	-0.24507	-0.233227
-4.3974	-0.82051	1.34869	-0.370303	-0.222099	0.42397	1.14595	-1.05939	-0.337455	0.0759879	-0.0416396	-0.13497	0.57697	-0.455614	-0.107416	-0.250511	0.109528	0.197997	0.273481	-0.233489	-0.324426	-0.21185	-0.439193	0.314168	0.589465	-0.488412	-0.151995	-0.439324	-0.226562	0.081786	-0.0966095	1.21347	-0.0470891	-0.143681	-0.702102	1.05821	-0.262605	-0.162197	0.313937	-0.115786	0.102964	-0.785059	0.0239792	-0.322912	0.0200685	0.172024	-0.134867	0.133249	-0.247074	-0.232998
-4.39641	-0.819768	1.34564	-0.371372	-0.22218	0.426349	1.14358	-1.06019	-0.338834	0.0749846	-0.043005	-0.137485	0.576255	-0.454083	-0.105847	-0.251223	0.111572	0.198181	0.272649	-0.2347	-0.323481	-0.210662	-0.441264	0.315912	0.590675	-0.487673	-0.152842	-0.439983	-0.22637	0.0817209	-0.0965911	1.21072	-0.0457809	-0.142897	-0.700515	1.05559	-0.263135	-0.163509	0.313989	-0.115547	0.104164	-0.786405	0.0233845	-0.32172	0.0204938	0.17413	-0.134405	0.131418	-0.249082	-0.232755
-4.39543	-0.819046	1.34261	-0.372424	-0.222276	0.428713	1.1412	-1.06099	-0.340218	0.0739793	-0.0443614	-0.140008	0.575511	-0.452551	-0.104277	-0.251947	0.113608	0.198351	0.271798	-0.235889	-0.322544	-0.209458	-0.443341	0.317647	0.591888	-0.486934	-0.153691	-0.440642	-0.226161	0.0816613	-0.0965802	1.20798	-0.0444871	-0.142099	-0.698914	1.05294	-0.263681	-0.164818	0.314034	-0.115314	0.105363	-0.787748	0.0227884	-0.320521	0.0209329	0.176224	-0.133956	0.129585	-0.251094	-0.232499
-4.39445	-0.818344	1.33962	-0.37346	-0.222388	0.431062	1.13882	-1.06178	-0.341607	0.0729722	-0.0457088	-0.142539	0.574738	-0.451018	-0.102706	-0.252683	0.115635	0.198505	0.270928	-0.237056	-0.321614	-0.208237	-0.445424	0.319373	0.593104	-0.486197	-0.154541	-0.441302	-0.225936	0.0816073	-0.0965769	1.20525	-0.0432078	-0.141287	-0.697298	1.05025	-0.264244	-0.166125	0.314073	-0.115089	0.106562	-0.78909	0.022191	-0.319315	0.0213857	0.178309	-0.133519	0.127749	-0.253108	-0.232229
-4.39346	-0.817662	1.33666	-0.37448	-0.222514	0.433396	1.13643	-1.06255	-0.343	0.0719633	-0.0470471	-0.145077	0.573937	-0.449483	-0.101134	-0.253431	0.117655	0.198645	0.270038	-0.238201	-0.320691	-0.206999	-0.447514	0.32109	0.594324	-0.485462	-0.155393	-0.441961	-0.225694	0.081559	-0.096581	1.20252	-0.0419431	-0.140461	-0.695667	1.04754	-0.264822	-0.16743	0.314106	-0.114872	0.10776	-0.790429	0.0215923	-0.318101	0.0218522	0.180383	-0.133095	0.125912	-0.255125	-0.231945
-4.39248	-0.817	1.33373	-0.375483	-0.222655	0.435715	1.13404	-1.06332	-0.344398	0.0709527	-0.0483763	-0.147623	0.573106	-0.447948	-0.0995623	-0.25419	0.119666	0.19877	0.26913	-0.239324	-0.319777	-0.205744	-0.449609	0.322798	0.595546	-0.484728	-0.156246	-0.442621	-0.225437	0.0815163	-0.0965926	1.19981	-0.040693	-0.139621	-0.694022	1.0448	-0.265417	-0.168733	0.314132	-0.114661	0.108957	-0.791766	0.0209924	-0.316881	0.022332	0.182445	-0.132683	0.124074	-0.257145	-0.231649
-4.3915	-0.816357	1.33083	-0.37647	-0.222812	0.438019	1.13165	-1.06407	-0.3458	0.0699404	-0.0496963	-0.150176	0.572246	-0.446411	-0.0979899	-0.254962	0.121669	0.19888	0.268202	-0.240424	-0.318871	-0.204472	-0.451711	0.324497	0.59677	-0.483995	-0.157101	-0.443281	-0.225163	0.0814794	-0.0966118	1.1971	-0.0394576	-0.138767	-0.692362	1.04202	-0.266027	-0.170033	0.314152	-0.114458	0.110153	-0.7931	0.0203914	-0.315653	0.0228251	0.184497	-0.132283	0.122234	-0.259167	-0.231339
-4.39052	-0.815735	1.32797	-0.377441	-0.222984	0.440306	1.12925	-1.06482	-0.347207	0.0689266	-0.0510072	-0.152736	0.571358	-0.444873	-0.0964175	-0.255745	0.123664	0.198975	0.267255	-0.241501	-0.317972	-0.203184	-0.453818	0.326186	0.597998	-0.483265	-0.157957	-0.44394	-0.224873	0.0814482	-0.0966385	1.1944	-0.0382369	-0.1379	-0.690688	1.03922	-0.266654	-0.171331	0.314166	-0.114262	0.111347	-0.794431	0.0197894	-0.314419	0.0233313	0.186537	-0.131896	0.120393	-0.261192	-0.231016
-4.38953	-0.815132	1.32514	-0.378394	-0.22317	0.442578	1.12685	-1.06555	-0.348618	0.0679113	-0.0523089	-0.155302	0.570442	-0.443334	-0.0948452	-0.25654	0.125651	0.199054	0.266289	-0.242555	-0.317082	-0.201879	-0.455931	0.327866	0.599227	-0.482536	-0.158815	-0.4446	-0.224568	0.0814228	-0.0966726	1.1917	-0.0370309	-0.13702	-0.689	1.03639	-0.267296	-0.172626	0.314174	-0.114074	0.11254	-0.795759	0.0191865	-0.313179	0.0238505	0.188566	-0.131522	0.118551	-0.263218	-0.23068
-4.38855	-0.81455	1.32235	-0.379331	-0.223372	0.444835	1.12445	-1.06628	-0.350033	0.0668945	-0.0536014	-0.157875	0.569497	-0.441793	-0.0932733	-0.257347	0.12763	0.199118	0.265303	-0.243586	-0.316201	-0.200558	-0.458049	0.329537	0.600459	-0.48181	-0.159674	-0.445258	-0.224246	0.0814032	-0.0967143	1.18902	-0.0358398	-0.136126	-0.687297	1.03352	-0.267955	-0.17392	0.314176	-0.113894	0.113731	-0.797085	0.0185826	-0.311932	0.0243824	0.190583	-0.131161	0.116709	-0.265247	-0.230331
-4.38757	-0.813987	1.31959	-0.380252	-0.223589	0.447075	1.12204	-1.06699	-0.351452	0.0658764	-0.0548846	-0.160453	0.568524	-0.440252	-0.0917019	-0.258165	0.129602	0.199167	0.264298	-0.244593	-0.315328	-0.19922	-0.460172	0.331198	0.601693	-0.481086	-0.160534	-0.445917	-0.223908	0.0813895	-0.0967635	1.18634	-0.0346635	-0.135219	-0.68558	1.03063	-0.268629	-0.175211	0.314172	-0.11372	0.11492	-0.798408	0.017978	-0.310679	0.0249271	0.192587	-0.130813	0.114866	-0.267277	-0.22997
-4.38658	-0.813444	1.31686	-0.381155	-0.223821	0.449299	1.11964	-1.06769	-0.352875	0.064857	-0.0561585	-0.163038	0.567524	-0.43871	-0.0901313	-0.258995	0.131565	0.199201	0.263275	-0.245575	-0.314463	-0.197865	-0.462301	0.332849	0.602929	-0.480363	-0.161396	-0.446574	-0.223555	0.0813815	-0.0968201	1.18367	-0.0335022	-0.1343	-0.683849	1.02771	-0.269319	-0.1765	0.314161	-0.113555	0.116107	-0.799727	0.0173727	-0.309419	0.0254843	0.194579	-0.130478	0.113023	-0.269308	-0.229597
-4.3856	-0.812921	1.31417	-0.382042	-0.224068	0.451507	1.11723	-1.06838	-0.354303	0.0638364	-0.0574232	-0.165628	0.566495	-0.437166	-0.0885616	-0.259837	0.133521	0.199218	0.262232	-0.246534	-0.313608	-0.196495	-0.464434	0.334491	0.604166	-0.479644	-0.162259	-0.447231	-0.223186	0.0813795	-0.0968843	1.18102	-0.0323558	-0.133368	-0.682104	1.02477	-0.270024	-0.177786	0.314145	-0.113397	0.117292	-0.801044	0.0167667	-0.308154	0.0260538	0.196559	-0.130156	0.111179	-0.271341	-0.229211
-4.38462	-0.812418	1.31151	-0.382912	-0.224329	0.453698	1.11483	-1.06906	-0.355734	0.0628146	-0.0586785	-0.168224	0.565438	-0.435622	-0.086993	-0.26069	0.135469	0.199221	0.261169	-0.247468	-0.312761	-0.195107	-0.466571	0.336122	0.605405	-0.478927	-0.163123	-0.447886	-0.222801	0.0813833	-0.0969559	1.17837	-0.0312244	-0.132424	-0.680345	1.02179	-0.270745	-0.179071	0.314122	-0.113247	0.118474	-0.802357	0.0161601	-0.306883	0.0266355	0.198526	-0.129847	0.109336	-0.273375	-0.228813
-4.38363	-0.811935	1.30889	-0.383765	-0.224606	0.455873	1.11242	-1.06973	-0.357169	0.0617918	-0.0599245	-0.170825	0.564354	-0.434077	-0.0854258	-0.261555	0.137409	0.199207	0.260088	-0.248378	-0.311923	-0.193704	-0.468714	0.337744	0.606646	-0.478212	-0.163989	-0.448541	-0.222401	0.0813931	-0.0970349	1.17573	-0.030108	-0.131468	-0.678572	1.01879	-0.271482	-0.180353	0.314094	-0.113105	0.119653	-0.803667	0.0155531	-0.305607	0.0272293	0.20048	-0.129552	0.107493	-0.275409	-0.228403
-4.38265	-0.811472	1.3063	-0.3846	-0.224897	0.458032	1.11002	-1.07039	-0.358608	0.060768	-0.0611611	-0.173431	0.563242	-0.43253	-0.0838601	-0.262431	0.139342	0.199178	0.258987	-0.249263	-0.311094	-0.192284	-0.47086	0.339356	0.607888	-0.477501	-0.164855	-0.449194	-0.221985	0.0814088	-0.0971214	1.1731	-0.0290067	-0.130499	-0.676785	1.01576	-0.272234	-0.181632	0.31406	-0.112971	0.120829	-0.804973	0.0149456	-0.304325	0.027835	0.20242	-0.12927	0.105651	-0.277444	-0.227982
-4.38167	-0.811029	1.30375	-0.385419	-0.225203	0.460173	1.10761	-1.07104	-0.36005	0.0597432	-0.0623884	-0.176041	0.562103	-0.430983	-0.0822961	-0.263319	0.141268	0.199133	0.257867	-0.250122	-0.310275	-0.190847	-0.473011	0.340957	0.609131	-0.476792	-0.165723	-0.449845	-0.221554	0.0814304	-0.0972152	1.17048	-0.0279205	-0.129519	-0.674984	1.0127	-0.273001	-0.18291	0.314019	-0.112845	0.122001	-0.806276	0.0143378	-0.303038	0.0284524	0.204347	-0.129002	0.103809	-0.27948	-0.227549
-4.38068	-0.810605	1.30124	-0.386221	-0.225524	0.462298	1.10521	-1.07167	-0.361496	0.0587176	-0.0636062	-0.178656	0.560937	-0.429435	-0.080734	-0.264218	0.143186	0.199071	0.256729	-0.250956	-0.309465	-0.189395	-0.475166	0.342548	0.610375	-0.476086	-0.166592	-0.450496	-0.221107	0.081458	-0.0973165	1.16787	-0.0268494	-0.128527	-0.673169	1.00962	-0.273783	-0.184185	0.313973	-0.112727	0.12317	-0.807575	0.0137298	-0.301745	0.0290813	0.206261	-0.128747	0.101968	-0.281516	-0.227104
-4.3797	-0.810201	1.29876	-0.387006	-0.22586	0.464406	1.10281	-1.0723	-0.362946	0.0576912	-0.0648146	-0.181275	0.559744	-0.427886	-0.079174	-0.265129	0.145096	0.198994	0.25557	-0.251765	-0.308664	-0.187927	-0.477324	0.344129	0.611619	-0.475384	-0.167462	-0.451144	-0.220645	0.0814916	-0.0974251	1.16527	-0.0257935	-0.127524	-0.671341	1.00651	-0.274581	-0.185458	0.313922	-0.112616	0.124336	-0.808871	0.0131215	-0.300448	0.0297217	0.20816	-0.128505	0.100128	-0.283552	-0.226648
-4.37872	-0.809817	1.29632	-0.387773	-0.22621	0.466496	1.10041	-1.07291	-0.364398	0.0566641	-0.0660136	-0.183897	0.558524	-0.426336	-0.0776162	-0.266051	0.147	0.198901	0.254393	-0.252547	-0.307873	-0.186442	-0.479486	0.3457	0.612865	-0.474685	-0.168333	-0.45179	-0.220168	0.0815312	-0.097541	1.16268	-0.0247527	-0.12651	-0.669499	1.00337	-0.275394	-0.186729	0.313864	-0.112514	0.125497	-0.810163	0.0125132	-0.299145	0.0303734	0.210046	-0.128278	0.0982892	-0.285587	-0.226181
-4.37774	-0.809453	1.29392	-0.388523	-0.226575	0.46857	1.09802	-1.07351	-0.365854	0.0556364	-0.0672032	-0.186524	0.557277	-0.424786	-0.076061	-0.266984	0.148896	0.198792	0.253197	-0.253304	-0.307092	-0.184942	-0.481651	0.34726	0.61411	-0.473989	-0.169205	-0.452435	-0.219676	0.0815767	-0.0976643	1.16011	-0.0237272	-0.125485	-0.667643	1.00021	-0.276221	-0.187998	0.313801	-0.11242	0.126654	-0.81145	0.0119048	-0.297838	0.0310361	0.211917	-0.128064	0.0964519	-0.287622	-0.225703
-4.37675	-0.809108	1.29155	-0.389256	-0.226955	0.470626	1.09562	-1.0741	-0.367314	0.054608	-0.0683833	-0.189154	0.556003	-0.423235	-0.0745083	-0.267928	0.150785	0.198667	0.251982	-0.254034	-0.30632	-0.183426	-0.48382	0.34881	0.615356	-0.473297	-0.170078	-0.453077	-0.219169	0.0816283	-0.0977949	1.15754	-0.0227168	-0.124449	-0.665774	0.997022	-0.277064	-0.189264	0.313732	-0.112335	0.127807	-0.812734	0.0112965	-0.296527	0.0317098	0.213773	-0.127864	0.0946161	-0.289657	-0.225214
-4.37577	-0.808783	1.28922	-0.389972	-0.227349	0.472665	1.09323	-1.07469	-0.368776	0.0535792	-0.0695539	-0.191787	0.554703	-0.421683	-0.0729586	-0.268883	0.152666	0.198525	0.250747	-0.254738	-0.305558	-0.181893	-0.485992	0.350349	0.616602	-0.472608	-0.170952	-0.453717	-0.218647	0.0816859	-0.0979326	1.15499	-0.0217217	-0.123402	-0.663892	0.993809	-0.277921	-0.190528	0.313658	-0.112257	0.128956	-0.814014	0.0106883	-0.295211	0.0323942	0.215614	-0.127678	0.0927822	-0.291691	-0.224715
-4.37479	-0.808478	1.28693	-0.39067	-0.227757	0.474686	1.09085	-1.07525	-0.370241	0.0525499	-0.070715	-0.194422	0.553377	-0.42013	-0.0714118	-0.26985	0.154541	0.198368	0.249494	-0.255414	-0.304807	-0.180346	-0.488166	0.351878	0.617848	-0.471924	-0.171826	-0.454355	-0.21811	0.0817495	-0.0980776	1.15245	-0.0207418	-0.122345	-0.661996	0.990571	-0.278793	-0.19179	0.313578	-0.112188	0.130099	-0.815289	0.0100803	-0.293891	0.0330893	0.217441	-0.127506	0.0909502	-0.293723	-0.224205
-4.3738	-0.808193	1.28468	-0.391351	-0.22818	0.47669	1.08847	-1.07581	-0.371709	0.0515203	-0.0718667	-0.197061	0.552024	-0.418577	-0.0698682	-0.270827	0.156409	0.198193	0.248221	-0.256064	-0.304065	-0.178782	-0.490343	0.353396	0.619094	-0.471243	-0.172702	-0.45499	-0.217558	0.0818192	-0.0982298	1.14992	-0.0197773	-0.121278	-0.660088	0.987308	-0.279679	-0.19305	0.313492	-0.112127	0.131238	-0.81656	0.00947255	-0.292567	0.0337948	0.219252	-0.127348	0.0891202	-0.295755	-0.223685
-4.37282	-0.807926	1.28246	-0.392015	-0.228617	0.478676	1.08609	-1.07636	-0.37318	0.0504904	-0.0730088	-0.199701	0.550646	-0.417023	-0.0683281	-0.271815	0.158269	0.198003	0.24693	-0.256687	-0.303334	-0.177203	-0.492523	0.354903	0.62034	-0.470566	-0.173578	-0.455622	-0.216992	0.0818949	-0.0983891	1.1474	-0.0188279	-0.120201	-0.658166	0.984022	-0.28058	-0.194307	0.313401	-0.112075	0.132371	-0.817827	0.00886515	-0.291238	0.0345106	0.221048	-0.127204	0.0872925	-0.297785	-0.223154
-4.37184	-0.80768	1.28028	-0.392661	-0.229068	0.480644	1.08373	-1.07689	-0.374654	0.0494602	-0.0741415	-0.202344	0.549241	-0.415469	-0.0667915	-0.272814	0.160123	0.197796	0.24562	-0.257282	-0.302613	-0.175608	-0.494705	0.356399	0.621584	-0.469893	-0.174455	-0.456252	-0.216412	0.0819766	-0.0985556	1.1449	-0.0178939	-0.119114	-0.656231	0.980711	-0.281496	-0.195562	0.313305	-0.112031	0.133499	-0.819089	0.00825818	-0.289906	0.0352366	0.222828	-0.127074	0.0854673	-0.299813	-0.222614
-4.37085	-0.807453	1.27815	-0.39329	-0.229533	0.482594	1.08136	-1.07742	-0.37613	0.0484299	-0.0752646	-0.204989	0.547811	-0.413914	-0.0652586	-0.273824	0.16197	0.197573	0.244291	-0.25785	-0.301903	-0.173998	-0.496889	0.357884	0.622828	-0.469225	-0.175332	-0.456879	-0.215816	0.0820643	-0.098729	1.14241	-0.0169751	-0.118018	-0.654283	0.977377	-0.282425	-0.196815	0.313203	-0.111995	0.134622	-0.820347	0.0076517	-0.288571	0.0359725	0.224593	-0.126958	0.0836447	-0.301839	-0.222063
-4.36987	-0.807245	1.27605	-0.393902	-0.230013	0.484526	1.079	-1.07793	-0.377609	0.0473995	-0.0763782	-0.207635	0.546356	-0.412358	-0.0637296	-0.274845	0.16381	0.197333	0.242942	-0.25839	-0.301203	-0.172373	-0.499076	0.359359	0.624071	-0.468561	-0.17621	-0.457502	-0.215207	0.0821581	-0.0989095	1.13993	-0.0160717	-0.116912	-0.652322	0.974019	-0.283369	-0.198066	0.313096	-0.111968	0.135738	-0.8216	0.00704579	-0.287232	0.0367182	0.226341	-0.126857	0.0818248	-0.303864	-0.221504
-4.36889	-0.807056	1.27398	-0.394496	-0.230506	0.486441	1.07665	-1.07843	-0.37909	0.0463691	-0.0774824	-0.210283	0.544875	-0.410802	-0.0622047	-0.275876	0.165643	0.197077	0.241575	-0.258902	-0.300514	-0.170732	-0.501263	0.360822	0.625313	-0.467902	-0.177089	-0.458122	-0.214584	0.0822579	-0.099097	1.13746	-0.0151835	-0.115798	-0.650349	0.970639	-0.284326	-0.199314	0.312984	-0.11195	0.136849	-0.822848	0.00644052	-0.285889	0.0374736	0.228073	-0.12677	0.0800078	-0.305886	-0.220934
-4.36791	-0.806887	1.27196	-0.395072	-0.231013	0.488337	1.07431	-1.07892	-0.380574	0.0453388	-0.0785769	-0.212932	0.543369	-0.409246	-0.0606841	-0.276917	0.16747	0.196804	0.24019	-0.259386	-0.299836	-0.169077	-0.503453	0.362274	0.626554	-0.467247	-0.177967	-0.458739	-0.213946	0.0823638	-0.0992914	1.13501	-0.0143106	-0.114674	-0.648363	0.967236	-0.285298	-0.20056	0.312867	-0.11194	0.137953	-0.824092	0.00583597	-0.284544	0.0382384	0.229789	-0.126697	0.078194	-0.307905	-0.220356
-4.36692	-0.806737	1.26998	-0.395631	-0.231534	0.490214	1.07197	-1.07939	-0.38206	0.0443085	-0.079662	-0.215581	0.541837	-0.407689	-0.059168	-0.277969	0.16929	0.196514	0.238785	-0.259842	-0.299169	-0.167406	-0.505644	0.363715	0.627793	-0.466597	-0.178847	-0.459352	-0.213294	0.0824756	-0.0994926	1.13257	-0.013453	-0.113542	-0.646364	0.96381	-0.286283	-0.201804	0.312744	-0.111939	0.139051	-0.82533	0.0052322	-0.283195	0.0390125	0.231488	-0.126639	0.0763833	-0.309922	-0.219768
-4.36594	-0.806606	1.26804	-0.396173	-0.232069	0.492074	1.06964	-1.07986	-0.383548	0.0432785	-0.0807376	-0.218232	0.540281	-0.406132	-0.0576564	-0.279032	0.171104	0.196208	0.237362	-0.260269	-0.298512	-0.16572	-0.507836	0.365145	0.629031	-0.465952	-0.179726	-0.459962	-0.212629	0.0825935	-0.0997007	1.13015	-0.0126107	-0.112401	-0.644353	0.960362	-0.287282	-0.203046	0.312617	-0.111947	0.140142	-0.826563	0.00462929	-0.281844	0.0397958	0.23317	-0.126596	0.074576	-0.311936	-0.219171
-4.36496	-0.806495	1.26614	-0.396697	-0.232618	0.493915	1.06732	-1.08031	-0.385037	0.0422487	-0.0818036	-0.220882	0.5387	-0.404575	-0.0561496	-0.280104	0.172911	0.195885	0.23592	-0.260667	-0.297867	-0.16402	-0.510029	0.366564	0.630266	-0.465312	-0.180606	-0.460568	-0.21195	0.0827174	-0.0999156	1.12774	-0.0117837	-0.111252	-0.642329	0.956893	-0.288294	-0.204285	0.312484	-0.111963	0.141226	-0.827791	0.00402732	-0.280489	0.040588	0.234835	-0.126566	0.0727723	-0.313947	-0.218565
-4.36397	-0.806402	1.26427	-0.397203	-0.23318	0.495738	1.06501	-1.08075	-0.386529	0.0412192	-0.0828602	-0.223533	0.537095	-0.403018	-0.0546477	-0.281187	0.174711	0.195546	0.23446	-0.261036	-0.297233	-0.162305	-0.512223	0.367971	0.6315	-0.464677	-0.181487	-0.46117	-0.211257	0.0828473	-0.100137	1.12535	-0.010972	-0.110095	-0.640294	0.953403	-0.28932	-0.205522	0.312347	-0.111988	0.142303	-0.829014	0.00342635	-0.279132	0.0413891	0.236482	-0.126552	0.0709722	-0.315954	-0.217951
-4.36299	-0.806328	1.26245	-0.397692	-0.233755	0.497542	1.06271	-1.08118	-0.388023	0.0401901	-0.0839072	-0.226183	0.535465	-0.40146	-0.053151	-0.28228	0.176506	0.195189	0.23298	-0.261377	-0.29661	-0.160575	-0.514418	0.369367	0.632731	-0.464047	-0.182367	-0.461768	-0.21055	0.0829831	-0.100365	1.12296	-0.0101755	-0.108931	-0.638246	0.949891	-0.290359	-0.206757	0.312204	-0.112022	0.143373	-0.830232	0.00282645	-0.277773	0.0421988	0.238113	-0.126551	0.069176	-0.317958	-0.217328
-4.36201	-0.806273	1.26067	-0.398164	-0.234344	0.499327	1.06041	-1.0816	-0.389518	0.0391615	-0.0849448	-0.228833	0.53381	-0.399902	-0.0516595	-0.283383	0.178294	0.194816	0.231483	-0.261688	-0.295999	-0.158831	-0.516613	0.370751	0.63396	-0.463423	-0.183247	-0.462361	-0.209831	0.083125	-0.1006	1.1206	-0.00939425	-0.107758	-0.636186	0.946359	-0.291411	-0.20799	0.312057	-0.112065	0.144435	-0.831444	0.0022277	-0.276412	0.043017	0.239725	-0.126566	0.0673837	-0.319958	-0.216697
-4.36102	-0.806237	1.25893	-0.398618	-0.234946	0.501094	1.05813	-1.08201	-0.391015	0.0381333	-0.0859728	-0.231482	0.532132	-0.398344	-0.0501735	-0.284496	0.180075	0.194427	0.229967	-0.26197	-0.295399	-0.157072	-0.518808	0.372124	0.635187	-0.462804	-0.184128	-0.462951	-0.209098	0.0832727	-0.100842	1.11825	-0.00862824	-0.106579	-0.634113	0.942806	-0.292476	-0.20922	0.311905	-0.112117	0.14549	-0.832651	0.00163016	-0.275048	0.0438435	0.24132	-0.126595	0.0655955	-0.321954	-0.216058
-4.36004	-0.80622	1.25722	-0.399055	-0.235561	0.502842	1.05586	-1.0824	-0.392513	0.0371058	-0.0869914	-0.23413	0.53043	-0.396786	-0.048693	-0.285619	0.181851	0.19402	0.228432	-0.262222	-0.294811	-0.155299	-0.521004	0.373486	0.63641	-0.462191	-0.185008	-0.463535	-0.208352	0.0834265	-0.101089	1.11591	-0.00787744	-0.105392	-0.63203	0.939234	-0.293553	-0.210448	0.311748	-0.112177	0.146537	-0.833852	0.00103391	-0.273682	0.0446782	0.242897	-0.126639	0.0638115	-0.323946	-0.215411
-4.35906	-0.806221	1.25556	-0.399474	-0.236189	0.504571	1.0536	-1.08278	-0.394013	0.0360789	-0.0880005	-0.236777	0.528704	-0.395228	-0.0472183	-0.286751	0.18362	0.193597	0.226879	-0.262445	-0.294235	-0.153512	-0.523199	0.374836	0.637631	-0.461584	-0.185888	-0.464116	-0.207592	0.0835861	-0.101344	1.11359	-0.00714183	-0.104198	-0.629934	0.935642	-0.294644	-0.211674	0.311587	-0.112247	0.147576	-0.835047	0.000439007	-0.272315	0.0455208	0.244455	-0.126697	0.062032	-0.325933	-0.214756
-4.35807	-0.806241	1.25394	-0.399875	-0.23683	0.506281	1.05135	-1.08315	-0.395514	0.0350528	-0.0890001	-0.239423	0.526955	-0.39367	-0.0457495	-0.287893	0.185383	0.193157	0.225308	-0.262637	-0.29367	-0.151711	-0.525395	0.376175	0.638849	-0.460982	-0.186768	-0.464691	-0.20682	0.0837517	-0.101604	1.11129	-0.00642139	-0.102998	-0.627827	0.93203	-0.295747	-0.212897	0.311421	-0.112326	0.148606	-0.836236	-0.000154469	-0.270945	0.0463713	0.245996	-0.126771	0.0602569	-0.327916	-0.214093
-4.35709	-0.80628	1.25237	-0.400259	-0.237484	0.507973	1.04911	-1.08351	-0.397016	0.0340274	-0.0899903	-0.242067	0.525182	-0.392113	-0.0442868	-0.289044	0.18714	0.1927	0.223719	-0.2628	-0.293117	-0.149896	-0.527589	0.377501	0.640063	-0.460387	-0.187648	-0.465262	-0.206036	0.0839231	-0.101871	1.109	-0.0057161	-0.101791	-0.625708	0.928399	-0.296863	-0.214118	0.311251	-0.112413	0.149628	-0.83742	-0.000746454	-0.269575	0.0472294	0.247517	-0.126858	0.0584865	-0.329894	-0.213423
-4.35611	-0.806336	1.25083	-0.400626	-0.238151	0.509645	1.04688	-1.08386	-0.398519	0.0330028	-0.090971	-0.244709	0.523386	-0.390555	-0.0428303	-0.290205	0.188891	0.192226	0.222111	-0.262933	-0.292576	-0.148067	-0.529783	0.378817	0.641274	-0.459797	-0.188527	-0.465828	-0.205238	0.0841004	-0.102144	1.10673	-0.00502593	-0.100578	-0.623577	0.92475	-0.29799	-0.215337	0.311076	-0.11251	0.150642	-0.838597	-0.00133688	-0.268202	0.048095	0.24902	-0.126961	0.0567208	-0.331867	-0.212746
-4.35513	-0.806411	1.24933	-0.400975	-0.23883	0.511299	1.04466	-1.08419	-0.400023	0.0319792	-0.0919423	-0.247348	0.521566	-0.388997	-0.0413802	-0.291375	0.190636	0.191736	0.220486	-0.263035	-0.292047	-0.146224	-0.531977	0.38012	0.642481	-0.459214	-0.189406	-0.466388	-0.204428	0.0842835	-0.102423	1.10448	-0.00435085	-0.0993589	-0.621436	0.921083	-0.29913	-0.216553	0.310897	-0.112616	0.151646	-0.839769	-0.00192568	-0.266829	0.0489679	0.250504	-0.127079	0.05496	-0.333835	-0.212062
-4.35414	-0.806504	1.24788	-0.401307	-0.239521	0.512933	1.04246	-1.08451	-0.401528	0.0309565	-0.0929043	-0.249985	0.519724	-0.38744	-0.0399366	-0.292554	0.192376	0.191228	0.218842	-0.263107	-0.291531	-0.144368	-0.534169	0.381412	0.643685	-0.458637	-0.190285	-0.466943	-0.203606	0.0844724	-0.102709	1.10224	-0.00369084	-0.0981339	-0.619283	0.917397	-0.300282	-0.217767	0.310713	-0.11273	0.152641	-0.840934	-0.00251279	-0.265454	0.0498479	0.251969	-0.127211	0.0532042	-0.335797	-0.21137
-4.35316	-0.806616	1.24647	-0.401621	-0.240225	0.514549	1.04027	-1.08482	-0.403034	0.0299349	-0.0938568	-0.25262	0.51786	-0.385883	-0.0384996	-0.293743	0.194109	0.190704	0.21718	-0.263149	-0.291026	-0.142499	-0.53636	0.382692	0.644884	-0.458067	-0.191163	-0.467493	-0.202772	0.0846672	-0.103	1.10002	-0.00304586	-0.0969034	-0.617119	0.913694	-0.301445	-0.218979	0.310526	-0.112854	0.153628	-0.842093	-0.00309814	-0.264079	0.050735	0.253415	-0.127358	0.0514535	-0.337754	-0.210672
-4.35218	-0.806745	1.2451	-0.401918	-0.240941	0.516145	1.03809	-1.08512	-0.40454	0.0289144	-0.0948	-0.255251	0.515972	-0.384327	-0.0370695	-0.29494	0.195836	0.190163	0.215501	-0.26316	-0.290534	-0.140616	-0.53855	0.38396	0.646079	-0.457503	-0.19204	-0.468038	-0.201925	0.0848677	-0.103297	1.09782	-0.00241588	-0.0956675	-0.614944	0.909974	-0.302621	-0.220188	0.310334	-0.112987	0.154604	-0.843245	-0.00368167	-0.262702	0.0516289	0.254841	-0.12752	0.0497081	-0.339705	-0.209968
-4.35119	-0.806892	1.24377	-0.402197	-0.24167	0.517722	1.03593	-1.0854	-0.406047	0.027895	-0.0957338	-0.257879	0.514063	-0.38277	-0.0356464	-0.296146	0.197558	0.189606	0.213803	-0.26314	-0.290054	-0.13872	-0.540738	0.385217	0.647269	-0.456946	-0.192917	-0.468577	-0.201067	0.0850739	-0.1036	1.09563	-0.00180086	-0.0944265	-0.612758	0.906236	-0.303807	-0.221395	0.310138	-0.113129	0.155571	-0.844391	-0.00426331	-0.261325	0.0525294	0.256248	-0.127696	0.047968	-0.341649	-0.209257
-4.35021	-0.807057	1.24248	-0.402459	-0.24241	0.519279	1.03378	-1.08568	-0.407554	0.0268769	-0.0966583	-0.260503	0.512131	-0.381215	-0.0342303	-0.297361	0.199274	0.189031	0.212088	-0.263089	-0.289587	-0.136811	-0.542924	0.386462	0.648455	-0.456395	-0.193793	-0.46911	-0.200197	0.0852858	-0.103909	1.09346	-0.00120077	-0.0931806	-0.610561	0.902482	-0.305005	-0.2226	0.309938	-0.113281	0.156528	-0.845531	-0.004843	-0.259948	0.0534364	0.257635	-0.127888	0.0462333	-0.343588	-0.208539
-4.34923	-0.807239	1.24123	-0.402704	-0.243162	0.520818	1.03165	-1.08593	-0.409062	0.0258601	-0.0975735	-0.263124	0.510177	-0.379659	-0.0328215	-0.298584	0.200985	0.18844	0.210355	-0.263007	-0.289132	-0.13489	-0.545108	0.387694	0.649637	-0.455852	-0.194668	-0.469637	-0.199315	0.0855033	-0.104223	1.09131	-0.000615564	-0.09193	-0.608354	0.898712	-0.306215	-0.223802	0.309734	-0.113441	0.157476	-0.846663	-0.00542067	-0.258569	0.0543498	0.259002	-0.128094	0.0445043	-0.34552	-0.207816
-4.34824	-0.807439	1.24003	-0.402932	-0.243925	0.522337	1.02953	-1.08618	-0.410569	0.0248446	-0.0984794	-0.265741	0.508202	-0.378105	-0.0314201	-0.299816	0.202689	0.187832	0.208605	-0.262894	-0.28869	-0.132955	-0.547291	0.388915	0.650813	-0.455316	-0.195542	-0.470159	-0.198422	0.0857265	-0.104543	1.08918	-4.52023e-05	-0.090675	-0.606136	0.894926	-0.307435	-0.225002	0.309526	-0.113611	0.158413	-0.847789	-0.00599627	-0.257191	0.0552693	0.260349	-0.128315	0.0427808	-0.347445	-0.207086
-4.34726	-0.807657	1.23887	-0.403142	-0.2447	0.523836	1.02743	-1.08642	-0.412077	0.0238305	-0.0993761	-0.268353	0.506205	-0.376551	-0.0300262	-0.301056	0.204389	0.187207	0.206837	-0.26275	-0.288261	-0.131008	-0.549471	0.390124	0.651984	-0.454786	-0.196415	-0.470674	-0.197517	0.0859553	-0.104869	1.08707	0.000510357	-0.0894157	-0.603907	0.891124	-0.308666	-0.226199	0.309314	-0.11379	0.159339	-0.848908	-0.00656972	-0.255813	0.0561948	0.261675	-0.128551	0.0410632	-0.349363	-0.206351
-4.34628	-0.807891	1.23775	-0.403335	-0.245487	0.525317	1.02534	-1.08664	-0.413585	0.0228179	-0.100263	-0.270961	0.504186	-0.374997	-0.02864	-0.302305	0.206082	0.186565	0.205052	-0.262575	-0.287844	-0.129049	-0.551648	0.391321	0.653149	-0.454264	-0.197287	-0.471183	-0.196601	0.0861897	-0.1052	1.08497	0.00105116	-0.0881525	-0.601669	0.887308	-0.309907	-0.227394	0.309099	-0.113979	0.160255	-0.850021	-0.00714097	-0.254434	0.0571262	0.262982	-0.128801	0.0393514	-0.351274	-0.205611
-4.3453	-0.808143	1.23668	-0.403511	-0.246285	0.526778	1.02327	-1.08685	-0.415092	0.0218068	-0.101142	-0.273564	0.502146	-0.373445	-0.0272616	-0.303561	0.20777	0.185907	0.203249	-0.262368	-0.287441	-0.127077	-0.553823	0.392506	0.65431	-0.45375	-0.198157	-0.471686	-0.195674	0.0864296	-0.105536	1.08289	0.00157725	-0.0868855	-0.59942	0.883476	-0.311159	-0.228586	0.30888	-0.114176	0.16116	-0.851126	-0.00770997	-0.253056	0.0580632	0.264267	-0.129067	0.0376456	-0.353178	-0.204865
-4.34431	-0.808412	1.23564	-0.40367	-0.247094	0.528219	1.02122	-1.08704	-0.4166	0.0207973	-0.102011	-0.276162	0.500085	-0.371893	-0.0258911	-0.304826	0.209453	0.185232	0.201429	-0.26213	-0.28705	-0.125094	-0.555995	0.39368	0.655464	-0.453243	-0.199027	-0.472182	-0.194737	0.0866749	-0.105877	1.08084	0.00208868	-0.0856149	-0.597161	0.87963	-0.312422	-0.229776	0.308657	-0.114383	0.162054	-0.852224	-0.00827664	-0.251678	0.0590057	0.265532	-0.129347	0.0359459	-0.355075	-0.204113
-4.34333	-0.808698	1.23465	-0.403811	-0.247913	0.529641	1.01918	-1.08723	-0.418107	0.0197895	-0.102871	-0.278754	0.498003	-0.370342	-0.0245287	-0.306098	0.21113	0.18454	0.199592	-0.26186	-0.286672	-0.123098	-0.558163	0.394841	0.656612	-0.452743	-0.199894	-0.472672	-0.193788	0.0869257	-0.106224	1.0788	0.0025855	-0.084341	-0.594892	0.875769	-0.313695	-0.230964	0.308431	-0.114599	0.162937	-0.853315	-0.00884092	-0.2503	0.0599535	0.266777	-0.129642	0.0342523	-0.356963	-0.203357
-4.34235	-0.809001	1.2337	-0.403936	-0.248744	0.531044	1.01716	-1.0874	-0.419613	0.0187834	-0.103721	-0.281341	0.495901	-0.368792	-0.0231744	-0.307378	0.212802	0.183832	0.197738	-0.261559	-0.286307	-0.121091	-0.560329	0.39599	0.657755	-0.452251	-0.200761	-0.473155	-0.192829	0.0871819	-0.106576	1.07678	0.00306776	-0.083064	-0.592614	0.871895	-0.314977	-0.232149	0.308201	-0.114825	0.163809	-0.854398	-0.00940277	-0.248923	0.0609065	0.268	-0.129951	0.0325649	-0.358844	-0.202596
-4.34136	-0.80932	1.2328	-0.404043	-0.249585	0.532427	1.01515	-1.08756	-0.421119	0.017779	-0.104563	-0.283923	0.493778	-0.367243	-0.0218285	-0.308665	0.214469	0.183107	0.195867	-0.261225	-0.285956	-0.119072	-0.562491	0.397127	0.65889	-0.451767	-0.201626	-0.473631	-0.191859	0.0874435	-0.106932	1.07478	0.00353551	-0.0817841	-0.590326	0.868008	-0.316269	-0.233331	0.307968	-0.11506	0.164669	-0.855474	-0.00996212	-0.247546	0.0618646	0.269202	-0.130275	0.0308839	-0.360716	-0.20183
-4.34038	-0.809656	1.23193	-0.404134	-0.250437	0.53379	1.01317	-1.0877	-0.422624	0.0167765	-0.105396	-0.286498	0.491634	-0.365694	-0.020491	-0.30996	0.21613	0.182366	0.193979	-0.26086	-0.285617	-0.117041	-0.564649	0.398253	0.66002	-0.451291	-0.202489	-0.474101	-0.19088	0.0877104	-0.107294	1.0728	0.00398881	-0.0805016	-0.588028	0.864107	-0.317571	-0.234511	0.307732	-0.115304	0.165518	-0.856543	-0.0105189	-0.24617	0.0628275	0.270383	-0.130614	0.0292092	-0.362581	-0.20106
-4.3394	-0.810008	1.23111	-0.404207	-0.251299	0.535134	1.0112	-1.08783	-0.424128	0.0157758	-0.106219	-0.289066	0.489471	-0.364148	-0.0191621	-0.311262	0.217786	0.181608	0.192074	-0.260464	-0.285292	-0.114999	-0.566804	0.399366	0.661143	-0.450823	-0.203351	-0.474563	-0.18989	0.0879825	-0.10766	1.07084	0.00442772	-0.0792167	-0.585721	0.860194	-0.318883	-0.235688	0.307492	-0.115558	0.166355	-0.857604	-0.0110731	-0.244796	0.0637951	0.271543	-0.130968	0.027541	-0.364436	-0.200285
-4.33841	-0.810377	1.23033	-0.404264	-0.252172	0.536459	1.00925	-1.08795	-0.425631	0.0147771	-0.107034	-0.291629	0.487288	-0.362602	-0.0178419	-0.312572	0.219437	0.180833	0.190153	-0.260035	-0.28498	-0.112947	-0.568955	0.400467	0.662259	-0.450363	-0.20421	-0.475018	-0.18889	0.0882599	-0.108031	1.0689	0.00485229	-0.0779296	-0.583404	0.856268	-0.320203	-0.236862	0.307249	-0.11582	0.167179	-0.858657	-0.0116246	-0.243422	0.0647672	0.272681	-0.131336	0.0258794	-0.366283	-0.199506
-4.33743	-0.810762	1.2296	-0.404304	-0.253054	0.537764	1.00732	-1.08806	-0.427133	0.0137804	-0.10784	-0.294184	0.485084	-0.361057	-0.0165305	-0.313888	0.221083	0.180042	0.188215	-0.259574	-0.284682	-0.110883	-0.571101	0.401556	0.663367	-0.449911	-0.205068	-0.475466	-0.18788	0.0885424	-0.108407	1.06698	0.00526259	-0.0766405	-0.581079	0.85233	-0.321533	-0.238034	0.307003	-0.116093	0.167992	-0.859702	-0.0121734	-0.242049	0.0657436	0.273797	-0.131719	0.0242244	-0.368121	-0.198723
-4.33645	-0.811162	1.2289	-0.404327	-0.253946	0.539049	1.00541	-1.08815	-0.428634	0.0127857	-0.108637	-0.296732	0.482862	-0.359514	-0.015228	-0.315211	0.222723	0.179235	0.18626	-0.259081	-0.284397	-0.108808	-0.573243	0.402634	0.664469	-0.449468	-0.205924	-0.475907	-0.186861	0.08883	-0.108787	1.06509	0.00565867	-0.0753497	-0.578744	0.84838	-0.322871	-0.239204	0.306755	-0.116374	0.168792	-0.86074	-0.0127194	-0.240678	0.0667243	0.274892	-0.132116	0.0225761	-0.36995	-0.197936
-4.33546	-0.811579	1.22825	-0.404334	-0.254848	0.540315	1.00352	-1.08823	-0.430134	0.0117932	-0.109425	-0.299273	0.480619	-0.357972	-0.0139346	-0.31654	0.224359	0.178411	0.184289	-0.258556	-0.284126	-0.106723	-0.575381	0.403699	0.665563	-0.449033	-0.206777	-0.47634	-0.185832	0.0891227	-0.109171	1.06321	0.00604061	-0.0740574	-0.576401	0.844419	-0.324218	-0.24037	0.306503	-0.116665	0.16958	-0.86177	-0.0132626	-0.239308	0.067709	0.275964	-0.132528	0.0209345	-0.37177	-0.197145
-4.33448	-0.812011	1.22765	-0.404323	-0.255759	0.541562	1.00165	-1.0883	-0.431632	0.0108028	-0.110204	-0.301807	0.478358	-0.356431	-0.0126503	-0.317877	0.225989	0.177571	0.182302	-0.257999	-0.283868	-0.104627	-0.577514	0.404752	0.66665	-0.448607	-0.207629	-0.476766	-0.184794	0.0894205	-0.10956	1.06135	0.00640847	-0.0727638	-0.574048	0.840447	-0.325574	-0.241534	0.306248	-0.116966	0.170354	-0.862791	-0.0138029	-0.23794	0.0686977	0.277015	-0.132955	0.0192998	-0.373579	-0.196351
-4.3335	-0.812458	1.22708	-0.404296	-0.25668	0.542788	0.999801	-1.08835	-0.433128	0.00981461	-0.110974	-0.304332	0.476078	-0.354892	-0.0113752	-0.319219	0.227614	0.176715	0.180299	-0.25741	-0.283624	-0.102521	-0.579642	0.405793	0.667729	-0.448189	-0.208478	-0.477184	-0.183747	0.0897232	-0.109953	1.05952	0.0067623	-0.0714692	-0.571688	0.836465	-0.326938	-0.242695	0.305991	-0.117275	0.171116	-0.863805	-0.0143403	-0.236574	0.06969	0.278044	-0.133396	0.017672	-0.37538	-0.195554
-4.33252	-0.812921	1.22656	-0.404253	-0.25761	0.543996	0.997971	-1.08839	-0.434623	0.00882871	-0.111736	-0.306849	0.473779	-0.353355	-0.0101096	-0.320568	0.229234	0.175843	0.17828	-0.256788	-0.283393	-0.100405	-0.581765	0.406823	0.668799	-0.44778	-0.209324	-0.477595	-0.182691	0.0900308	-0.11035	1.0577	0.00710219	-0.0701737	-0.569318	0.832472	-0.32831	-0.243854	0.305731	-0.117594	0.171865	-0.86481	-0.0148747	-0.235209	0.0706859	0.27905	-0.133851	0.0160511	-0.37717	-0.194753
-4.33153	-0.813399	1.22608	-0.404193	-0.258549	0.545183	0.996162	-1.08842	-0.436116	0.00784513	-0.112489	-0.309359	0.471461	-0.351819	-0.00885338	-0.321923	0.23085	0.174954	0.176245	-0.256134	-0.283177	-0.0982794	-0.583882	0.40784	0.669862	-0.44738	-0.210169	-0.477998	-0.181626	0.0903432	-0.110751	1.05591	0.0074282	-0.0688776	-0.566941	0.828469	-0.32969	-0.24501	0.305468	-0.117923	0.172601	-0.865807	-0.0154061	-0.233846	0.0716852	0.280034	-0.13432	0.0144373	-0.37895	-0.193949
-4.33055	-0.813892	1.22565	-0.404117	-0.259497	0.546352	0.994374	-1.08843	-0.437608	0.00686392	-0.113233	-0.311859	0.469125	-0.350285	-0.0076068	-0.323284	0.23246	0.17405	0.174194	-0.255448	-0.282974	-0.0961438	-0.585994	0.408845	0.670916	-0.446989	-0.21101	-0.478392	-0.180553	0.0906604	-0.111156	1.05414	0.00774041	-0.0675811	-0.564555	0.824457	-0.331078	-0.246163	0.305203	-0.118261	0.173324	-0.866796	-0.0159344	-0.232485	0.0726878	0.280995	-0.134804	0.0128304	-0.38072	-0.193143
-4.32957	-0.8144	1.22525	-0.404025	-0.260453	0.5475	0.992607	-1.08844	-0.439097	0.00588514	-0.113968	-0.314351	0.466771	-0.348752	-0.0063699	-0.32465	0.234065	0.173129	0.172127	-0.25473	-0.282785	-0.0939987	-0.588101	0.409838	0.671962	-0.446607	-0.211849	-0.478779	-0.179471	0.0909824	-0.111564	1.05239	0.00803887	-0.0662845	-0.562161	0.820435	-0.332473	-0.247313	0.304936	-0.118608	0.174032	-0.867776	-0.0164596	-0.231127	0.0736935	0.281934	-0.135302	0.0112307	-0.382479	-0.192334
-4.32858	-0.814923	1.2249	-0.403916	-0.261418	0.548629	0.990863	-1.08842	-0.440584	0.00490885	-0.114695	-0.316833	0.464398	-0.347222	-0.00514281	-0.326022	0.235666	0.172193	0.170045	-0.253979	-0.28261	-0.0918442	-0.590202	0.41082	0.672999	-0.446234	-0.212685	-0.479158	-0.178381	0.0913091	-0.111976	1.05067	0.00832368	-0.0649879	-0.559759	0.816404	-0.333875	-0.24846	0.304666	-0.118964	0.174728	-0.868747	-0.0169815	-0.22977	0.0747021	0.28285	-0.135814	0.00963814	-0.384227	-0.191522
-4.3276	-0.81546	1.22459	-0.403791	-0.262391	0.549739	0.98914	-1.0884	-0.442069	0.00393508	-0.115414	-0.319307	0.462008	-0.345693	-0.0039256	-0.3274	0.237261	0.17124	0.167948	-0.253196	-0.282448	-0.0896807	-0.592296	0.411789	0.674027	-0.44587	-0.213518	-0.479528	-0.177282	0.0916403	-0.112392	1.04896	0.00859491	-0.0636916	-0.55735	0.812365	-0.335284	-0.249604	0.304393	-0.11933	0.175409	-0.86971	-0.0175003	-0.228416	0.0757135	0.283743	-0.136341	0.00805277	-0.385965	-0.190708
-4.32662	-0.816012	1.22433	-0.40365	-0.263372	0.550829	0.98744	-1.08836	-0.443551	0.0029639	-0.116124	-0.32177	0.459601	-0.344166	-0.00271839	-0.328782	0.238852	0.170272	0.165835	-0.252381	-0.282301	-0.0875081	-0.594385	0.412747	0.675046	-0.445516	-0.214348	-0.479891	-0.176176	0.0919762	-0.112811	1.04728	0.00885263	-0.0623958	-0.554932	0.808318	-0.336701	-0.250746	0.304119	-0.119705	0.176076	-0.870664	-0.0180158	-0.227065	0.0767276	0.284613	-0.136881	0.00647463	-0.387692	-0.189891
-4.32563	-0.816577	1.22411	-0.403493	-0.264362	0.5519	0.985762	-1.0883	-0.445031	0.00199535	-0.116826	-0.324224	0.457175	-0.342642	-0.00152127	-0.33017	0.240437	0.169288	0.163707	-0.251533	-0.282168	-0.0853268	-0.596467	0.413692	0.676055	-0.445171	-0.215175	-0.480245	-0.175062	0.0923165	-0.113234	1.04562	0.00909692	-0.0611008	-0.552508	0.804263	-0.338124	-0.251884	0.303842	-0.12009	0.176729	-0.871609	-0.018528	-0.225716	0.0777441	0.28546	-0.137435	0.00490376	-0.389407	-0.189073
-4.32465	-0.817157	1.22392	-0.40332	-0.265358	0.552951	0.984108	-1.08824	-0.446508	0.00102949	-0.117519	-0.326668	0.454733	-0.341119	-0.000334339	-0.331563	0.242018	0.168288	0.161564	-0.250653	-0.282048	-0.083137	-0.598542	0.414626	0.677055	-0.444835	-0.215998	-0.48059	-0.173941	0.0926612	-0.113659	1.04399	0.00932786	-0.0598067	-0.550076	0.8002	-0.339553	-0.25302	0.303563	-0.120484	0.177368	-0.872546	-0.0190368	-0.22437	0.0787629	0.286284	-0.138004	0.00334021	-0.39111	-0.188252
-4.32367	-0.817751	1.22379	-0.403131	-0.266363	0.553983	0.982477	-1.08816	-0.447983	6.63484e-05	-0.118204	-0.329102	0.452274	-0.339598	0.00084232	-0.33296	0.243594	0.167273	0.159406	-0.24974	-0.281943	-0.0809388	-0.600611	0.415548	0.678046	-0.444509	-0.216818	-0.480927	-0.172812	0.0930103	-0.114088	1.04238	0.00954553	-0.0585138	-0.547637	0.796131	-0.340989	-0.254152	0.303283	-0.120887	0.177993	-0.873473	-0.0195423	-0.223027	0.0797839	0.287085	-0.138586	0.00178399	-0.392802	-0.18743
-4.32269	-0.818358	1.22369	-0.402926	-0.267375	0.554995	0.980869	-1.08806	-0.449454	-0.000894011	-0.11888	-0.331525	0.449797	-0.33808	0.00200861	-0.334362	0.245166	0.166243	0.157234	-0.248795	-0.281852	-0.0787325	-0.602673	0.416458	0.679027	-0.444193	-0.217635	-0.481255	-0.171676	0.0933637	-0.11452	1.04079	0.00975002	-0.0572222	-0.54519	0.792054	-0.342431	-0.255282	0.303	-0.121299	0.178603	-0.874391	-0.0200443	-0.221687	0.080807	0.287863	-0.139182	0.000235147	-0.394483	-0.186607
-4.3217	-0.818979	1.22364	-0.402705	-0.268393	0.555988	0.979285	-1.08795	-0.450923	-0.00185154	-0.119549	-0.333937	0.447305	-0.336564	0.00316445	-0.335768	0.246732	0.165197	0.155047	-0.247818	-0.281776	-0.0765181	-0.604728	0.417356	0.679997	-0.443887	-0.218448	-0.481575	-0.170533	0.0937213	-0.114954	1.03922	0.0099414	-0.0559323	-0.542737	0.787971	-0.343879	-0.256408	0.302716	-0.121721	0.179198	-0.8753	-0.0205428	-0.220349	0.0818319	0.288617	-0.139791	-0.0013063	-0.396151	-0.185782
-4.32072	-0.819613	1.22363	-0.402469	-0.269419	0.556961	0.977726	-1.08783	-0.452389	-0.0028062	-0.120209	-0.336339	0.444795	-0.335051	0.00430975	-0.337179	0.248294	0.164135	0.152845	-0.246808	-0.281713	-0.0742961	-0.606775	0.418243	0.680958	-0.443591	-0.219258	-0.481886	-0.169383	0.094083	-0.115391	1.03768	0.0101198	-0.0546442	-0.540277	0.783882	-0.345332	-0.257531	0.30243	-0.122152	0.179778	-0.8762	-0.0210378	-0.219015	0.0828586	0.289348	-0.140415	-0.00284033	-0.397806	-0.184956
-4.31974	-0.82026	1.22366	-0.402218	-0.270452	0.557916	0.97619	-1.0877	-0.453851	-0.00375795	-0.120861	-0.338729	0.44227	-0.33354	0.00544441	-0.338593	0.249851	0.163058	0.150629	-0.245766	-0.281665	-0.0720665	-0.608815	0.419118	0.681908	-0.443304	-0.220063	-0.482188	-0.168227	0.0944489	-0.115831	1.03616	0.0102852	-0.0533582	-0.537811	0.779787	-0.346791	-0.258651	0.302142	-0.122592	0.180343	-0.87709	-0.0215292	-0.217684	0.0838868	0.290055	-0.141052	-0.00436691	-0.39945	-0.184128
-4.31875	-0.82092	1.22373	-0.401951	-0.271491	0.558851	0.97468	-1.08755	-0.45531	-0.00470672	-0.121505	-0.341107	0.439729	-0.332031	0.00656837	-0.340012	0.251403	0.161967	0.148399	-0.244692	-0.281631	-0.0698296	-0.610848	0.419981	0.682848	-0.443028	-0.220865	-0.482481	-0.167064	0.0948187	-0.116273	1.03467	0.0104378	-0.0520744	-0.535338	0.775687	-0.348255	-0.259768	0.301853	-0.123042	0.180893	-0.877971	-0.0220171	-0.216357	0.0849164	0.290739	-0.141702	-0.00588604	-0.401081	-0.1833
-4.31777	-0.821592	1.22384	-0.401668	-0.272536	0.559766	0.973194	-1.08739	-0.456766	-0.00565249	-0.122141	-0.343474	0.437171	-0.330525	0.00768154	-0.341434	0.25295	0.16086	0.146154	-0.243586	-0.281611	-0.0675855	-0.612872	0.420832	0.683777	-0.442761	-0.221663	-0.482765	-0.165895	0.0951926	-0.116718	1.0332	0.0105777	-0.0507931	-0.532859	0.771581	-0.349724	-0.260882	0.301562	-0.123501	0.181428	-0.878843	-0.0225013	-0.215033	0.0859474	0.291398	-0.142365	-0.00739769	-0.402699	-0.182471
-4.31679	-0.822277	1.224	-0.401371	-0.273588	0.560663	0.971734	-1.08721	-0.458218	-0.0065952	-0.12277	-0.345829	0.434599	-0.329022	0.00878385	-0.342859	0.254493	0.159738	0.143896	-0.242447	-0.281605	-0.0653345	-0.614889	0.421672	0.684695	-0.442505	-0.222456	-0.48304	-0.164719	0.0955702	-0.117165	1.03175	0.0107049	-0.0495145	-0.530374	0.767471	-0.351198	-0.261992	0.30127	-0.123969	0.181948	-0.879704	-0.0229819	-0.213713	0.0869794	0.292035	-0.143042	-0.00890186	-0.404304	-0.181641
-4.3158	-0.822975	1.2242	-0.401058	-0.274646	0.56154	0.970299	-1.08702	-0.459666	-0.00753482	-0.12339	-0.348172	0.43201	-0.327522	0.0098752	-0.344288	0.256031	0.158601	0.141624	-0.241276	-0.281614	-0.0630768	-0.616897	0.4225	0.685602	-0.44226	-0.223246	-0.483306	-0.163538	0.0959517	-0.117614	1.03033	0.0108195	-0.0482388	-0.527882	0.763356	-0.352676	-0.2631	0.300976	-0.124446	0.182451	-0.880557	-0.0234587	-0.212396	0.0880125	0.292647	-0.143732	-0.0103985	-0.405895	-0.180811
-4.31482	-0.823684	1.22444	-0.40073	-0.275709	0.562398	0.96889	-1.08681	-0.461111	-0.00847129	-0.124002	-0.350502	0.429407	-0.326024	0.0109555	-0.34572	0.257564	0.15745	0.139339	-0.240073	-0.281638	-0.0608127	-0.618898	0.423316	0.686497	-0.442024	-0.224031	-0.483563	-0.162351	0.0963369	-0.118065	1.02893	0.0109216	-0.0469663	-0.525385	0.759238	-0.354158	-0.264203	0.300681	-0.124932	0.182939	-0.881399	-0.0239319	-0.211083	0.0890464	0.293235	-0.144436	-0.0118877	-0.407474	-0.179981
-4.31384	-0.824406	1.22472	-0.400387	-0.276778	0.563237	0.967506	-1.0866	-0.462551	-0.00940458	-0.124607	-0.35282	0.426789	-0.32453	0.0120248	-0.347154	0.259092	0.156284	0.13704	-0.238838	-0.281675	-0.0585422	-0.620889	0.424121	0.687382	-0.441799	-0.224811	-0.483811	-0.161158	0.0967257	-0.118518	1.02756	0.0110113	-0.045697	-0.522882	0.755116	-0.355645	-0.265304	0.300385	-0.125427	0.183412	-0.882232	-0.0244012	-0.209774	0.090081	0.293799	-0.145152	-0.0133694	-0.409039	-0.17915
-4.31286	-0.825139	1.22504	-0.400029	-0.277852	0.564057	0.966149	-1.08636	-0.463988	-0.0103346	-0.125204	-0.355124	0.424156	-0.323038	0.0130829	-0.348592	0.260616	0.155103	0.134727	-0.23757	-0.281727	-0.0562657	-0.622872	0.424915	0.688255	-0.441585	-0.225587	-0.484049	-0.159961	0.0971181	-0.118973	1.02621	0.0110888	-0.0444314	-0.520374	0.75099	-0.357136	-0.266401	0.300088	-0.125932	0.183868	-0.883054	-0.0248668	-0.208469	0.0911161	0.29434	-0.145881	-0.0148435	-0.41059	-0.17832
-4.31187	-0.825884	1.22541	-0.399657	-0.278932	0.564858	0.964819	-1.08612	-0.46542	-0.0112614	-0.125793	-0.357416	0.421508	-0.321549	0.0141297	-0.350032	0.262135	0.153908	0.132402	-0.236271	-0.281794	-0.0539834	-0.624846	0.425697	0.689116	-0.441381	-0.226358	-0.484278	-0.158758	0.097514	-0.119429	1.02489	0.0111541	-0.0431695	-0.51786	0.746861	-0.35863	-0.267494	0.29979	-0.126446	0.184308	-0.883867	-0.0253285	-0.207167	0.0921517	0.294856	-0.146623	-0.0163102	-0.412128	-0.177489
-4.31089	-0.82664	1.22581	-0.399269	-0.280016	0.56564	0.963515	-1.08585	-0.466848	-0.0121849	-0.126375	-0.359695	0.418846	-0.320064	0.0151653	-0.351474	0.263649	0.152699	0.130064	-0.23494	-0.281875	-0.0516955	-0.626811	0.426467	0.689965	-0.441188	-0.227125	-0.484498	-0.15755	0.0979134	-0.119887	1.02359	0.0112072	-0.0419116	-0.515342	0.74273	-0.360128	-0.268584	0.299491	-0.126968	0.184732	-0.88467	-0.0257864	-0.20587	0.0931876	0.295348	-0.147378	-0.0177693	-0.413651	-0.176659
-4.30991	-0.827407	1.22626	-0.398867	-0.281105	0.566403	0.962238	-1.08558	-0.468272	-0.0131051	-0.126949	-0.361959	0.416169	-0.318581	0.0161894	-0.352919	0.265159	0.151475	0.127712	-0.233577	-0.28197	-0.0494022	-0.628767	0.427227	0.690802	-0.441005	-0.227886	-0.484708	-0.156337	0.098316	-0.120346	1.02232	0.0112484	-0.0406578	-0.512818	0.738596	-0.361629	-0.269671	0.299191	-0.1275	0.18514	-0.885462	-0.0262404	-0.204578	0.0942236	0.295815	-0.148145	-0.019221	-0.415161	-0.17583
-4.30892	-0.828185	1.22674	-0.398451	-0.282198	0.567147	0.960988	-1.08529	-0.469691	-0.0140218	-0.127516	-0.36421	0.413479	-0.317102	0.0172022	-0.354365	0.266663	0.150237	0.125349	-0.232182	-0.28208	-0.0471037	-0.630714	0.427975	0.691627	-0.440834	-0.228642	-0.484908	-0.155119	0.0987219	-0.120807	1.02107	0.0112777	-0.0394085	-0.510289	0.73446	-0.363133	-0.270754	0.29889	-0.128041	0.185531	-0.886244	-0.0266905	-0.203289	0.0952596	0.296259	-0.148925	-0.0206651	-0.416656	-0.175001
-4.30794	-0.828973	1.22727	-0.398021	-0.283296	0.567872	0.959765	-1.08499	-0.471106	-0.0149352	-0.128075	-0.366447	0.410775	-0.315627	0.0182035	-0.355813	0.268163	0.148986	0.122972	-0.230755	-0.282205	-0.0448002	-0.632651	0.428711	0.692439	-0.440673	-0.229393	-0.485099	-0.153898	0.099131	-0.121269	1.01985	0.0112951	-0.0381637	-0.507755	0.730323	-0.36464	-0.271833	0.298589	-0.128591	0.185906	-0.887016	-0.0271366	-0.202005	0.0962955	0.296678	-0.149717	-0.0221019	-0.418136	-0.174172
-4.30696	-0.829772	1.22784	-0.397576	-0.284397	0.568578	0.95857	-1.08467	-0.472516	-0.015845	-0.128627	-0.36867	0.408058	-0.314155	0.0191932	-0.357263	0.269659	0.14772	0.120584	-0.229297	-0.282344	-0.0424921	-0.634578	0.429437	0.693239	-0.440523	-0.230139	-0.48528	-0.152672	0.0995432	-0.121732	1.01865	0.0113009	-0.0369237	-0.505217	0.726184	-0.366149	-0.272909	0.298287	-0.129149	0.186264	-0.887778	-0.0275788	-0.200725	0.097331	0.297073	-0.150521	-0.0235311	-0.419602	-0.173345
-4.30597	-0.830582	1.22845	-0.397117	-0.285503	0.569266	0.957403	-1.08434	-0.473921	-0.0167514	-0.129172	-0.370879	0.405327	-0.312686	0.0201713	-0.358714	0.271149	0.146441	0.118183	-0.227807	-0.282497	-0.0401795	-0.636495	0.430151	0.694027	-0.440385	-0.23088	-0.485452	-0.151442	0.0999584	-0.122195	1.01748	0.011295	-0.0356888	-0.502675	0.722044	-0.367661	-0.273981	0.297984	-0.129717	0.186605	-0.888529	-0.028017	-0.19945	0.0983662	0.297443	-0.151337	-0.0249529	-0.421052	-0.172519
-4.30499	-0.831401	1.2291	-0.396644	-0.286612	0.569935	0.956264	-1.08399	-0.475321	-0.0176543	-0.12971	-0.373072	0.402583	-0.311221	0.0211377	-0.360166	0.272635	0.145148	0.11577	-0.226285	-0.282665	-0.0378626	-0.638403	0.430855	0.694801	-0.440257	-0.231614	-0.485614	-0.150208	0.100376	-0.12266	1.01634	0.0112777	-0.0344591	-0.500128	0.717903	-0.369174	-0.275049	0.297681	-0.130293	0.18693	-0.889269	-0.0284511	-0.19818	0.0994009	0.297789	-0.152166	-0.0263673	-0.422488	-0.171693
-4.30401	-0.83223	1.22978	-0.396157	-0.287725	0.570585	0.955153	-1.08363	-0.476716	-0.0185535	-0.13024	-0.375251	0.399827	-0.30976	0.0220924	-0.361619	0.274116	0.143841	0.113346	-0.224733	-0.282848	-0.0355417	-0.6403	0.431547	0.695562	-0.440141	-0.232343	-0.485766	-0.14897	0.100797	-0.123125	1.01522	0.011249	-0.0332347	-0.497577	0.713762	-0.37069	-0.276113	0.297378	-0.130879	0.187237	-0.889999	-0.0288813	-0.196914	0.100435	0.298111	-0.153006	-0.0277743	-0.423909	-0.17087
-4.30302	-0.833068	1.23051	-0.395656	-0.28884	0.571217	0.954071	-1.08325	-0.478106	-0.0194492	-0.130764	-0.377415	0.397057	-0.308302	0.0230354	-0.363073	0.275592	0.142521	0.110909	-0.223148	-0.283045	-0.033217	-0.642187	0.432228	0.69631	-0.440035	-0.233067	-0.485908	-0.14773	0.101221	-0.12359	1.01412	0.011209	-0.032016	-0.495023	0.709621	-0.372207	-0.277173	0.297074	-0.131473	0.187527	-0.890718	-0.0293074	-0.195653	0.101468	0.298408	-0.153859	-0.029174	-0.425314	-0.170047
-4.30204	-0.833916	1.23128	-0.395141	-0.289959	0.571831	0.953017	-1.08286	-0.47949	-0.0203412	-0.13128	-0.379563	0.394275	-0.306849	0.0239665	-0.364527	0.277063	0.141188	0.108462	-0.221533	-0.283257	-0.0308888	-0.644063	0.432898	0.697045	-0.439941	-0.233784	-0.48604	-0.146485	0.101648	-0.124056	1.01306	0.0111578	-0.0308031	-0.492464	0.70548	-0.373726	-0.27823	0.296771	-0.132076	0.1878	-0.891427	-0.0297294	-0.194397	0.1025	0.29868	-0.154723	-0.0305663	-0.426703	-0.169227
-4.30106	-0.834773	1.23209	-0.394613	-0.29108	0.572425	0.951992	-1.08246	-0.480869	-0.0212296	-0.131789	-0.381696	0.391481	-0.305399	0.0248858	-0.365982	0.27853	0.139842	0.106003	-0.219886	-0.283483	-0.0285573	-0.645928	0.433558	0.697766	-0.439859	-0.234496	-0.486163	-0.145238	0.102077	-0.124522	1.01202	0.0110955	-0.0295962	-0.489902	0.70134	-0.375246	-0.279282	0.296466	-0.132688	0.188056	-0.892124	-0.0301473	-0.193146	0.103531	0.298928	-0.155598	-0.0319513	-0.428077	-0.168407
-4.30008	-0.835639	1.23293	-0.394072	-0.292204	0.573002	0.950996	-1.08204	-0.482242	-0.0221142	-0.132292	-0.383813	0.388675	-0.303953	0.0257932	-0.367436	0.279992	0.138483	0.103533	-0.218209	-0.283724	-0.0262226	-0.647783	0.434207	0.698474	-0.439788	-0.235201	-0.486275	-0.143988	0.102508	-0.124989	1.011	0.0110222	-0.0283956	-0.487337	0.697201	-0.376766	-0.280331	0.296162	-0.133308	0.188294	-0.892811	-0.0305611	-0.1919	0.104561	0.299152	-0.156485	-0.033329	-0.429436	-0.16759
-4.29909	-0.836514	1.23382	-0.393517	-0.29333	0.57356	0.950029	-1.08161	-0.48361	-0.0229951	-0.132788	-0.385914	0.385857	-0.302511	0.0266886	-0.368891	0.281448	0.137111	0.101052	-0.2165	-0.283979	-0.0238851	-0.649626	0.434844	0.699168	-0.439728	-0.2359	-0.486378	-0.142736	0.102942	-0.125455	1.01002	0.0109381	-0.0272013	-0.484768	0.693062	-0.378288	-0.281375	0.295858	-0.133937	0.188515	-0.893487	-0.0309708	-0.190659	0.10559	0.299351	-0.157383	-0.0346995	-0.430778	-0.166775
-4.29811	-0.837396	1.23474	-0.392949	-0.294459	0.5741	0.949091	-1.08116	-0.484972	-0.0238723	-0.133277	-0.387999	0.383027	-0.301074	0.027572	-0.370345	0.2829	0.135727	0.0985605	-0.214761	-0.284249	-0.0215451	-0.651458	0.435472	0.699848	-0.439679	-0.236592	-0.486471	-0.141481	0.103378	-0.125922	1.00906	0.0108433	-0.0260136	-0.482196	0.688926	-0.37981	-0.282416	0.295554	-0.134575	0.188718	-0.894152	-0.0313763	-0.189423	0.106617	0.299525	-0.158292	-0.0360629	-0.432104	-0.165962
-4.29713	-0.838288	1.2357	-0.392367	-0.295589	0.574621	0.948183	-1.08069	-0.486328	-0.0247456	-0.133759	-0.390068	0.380186	-0.299641	0.0284433	-0.371799	0.284347	0.13433	0.0960584	-0.212991	-0.284533	-0.0192026	-0.653279	0.436088	0.700513	-0.439643	-0.237278	-0.486553	-0.140223	0.103817	-0.126388	1.00812	0.0107378	-0.0248327	-0.479622	0.684791	-0.381332	-0.283452	0.29525	-0.135222	0.188904	-0.894805	-0.0317777	-0.188192	0.107643	0.299674	-0.159212	-0.037419	-0.433414	-0.165152
-4.29614	-0.839187	1.2367	-0.391773	-0.29672	0.575125	0.947305	-1.08022	-0.487678	-0.0256151	-0.134235	-0.39212	0.377333	-0.298212	0.0293026	-0.373252	0.285789	0.13292	0.093546	-0.21119	-0.284832	-0.0168581	-0.655088	0.436694	0.701165	-0.439618	-0.237957	-0.486626	-0.138964	0.104257	-0.126853	1.00722	0.0106217	-0.0236588	-0.477044	0.680659	-0.382854	-0.284484	0.294947	-0.135877	0.189072	-0.895448	-0.0321749	-0.186967	0.108667	0.299799	-0.160143	-0.0387681	-0.434707	-0.164344
-4.29516	-0.840093	1.23774	-0.391166	-0.297853	0.57561	0.946456	-1.07972	-0.489022	-0.0264808	-0.134705	-0.394155	0.37447	-0.296787	0.0301498	-0.374704	0.287226	0.131498	0.0910234	-0.209359	-0.285145	-0.0145116	-0.656886	0.43729	0.701802	-0.439604	-0.23863	-0.486688	-0.137702	0.1047	-0.127318	1.00634	0.0104953	-0.0224921	-0.474464	0.676529	-0.384376	-0.285511	0.294643	-0.13654	0.189222	-0.896079	-0.032568	-0.185747	0.109689	0.2999	-0.161085	-0.0401101	-0.435984	-0.163538
-4.29418	-0.841007	1.23882	-0.390547	-0.298987	0.576078	0.945638	-1.07922	-0.490359	-0.0273425	-0.135168	-0.396174	0.371596	-0.295367	0.0309848	-0.376155	0.288658	0.130064	0.0884909	-0.207498	-0.285473	-0.0121636	-0.658672	0.437875	0.702425	-0.439602	-0.239295	-0.486741	-0.136439	0.105145	-0.127783	1.00549	0.0103585	-0.0213327	-0.471882	0.672402	-0.385898	-0.286534	0.29434	-0.137212	0.189354	-0.896699	-0.0329568	-0.184532	0.110709	0.299975	-0.162038	-0.0414451	-0.437244	-0.162735
-4.29319	-0.841929	1.23993	-0.389914	-0.300122	0.576527	0.944849	-1.0787	-0.491691	-0.0282004	-0.135624	-0.398175	0.368711	-0.293952	0.0318076	-0.377604	0.290085	0.128618	0.0859486	-0.205607	-0.285815	-0.00981409	-0.660445	0.43845	0.703032	-0.439612	-0.239954	-0.486783	-0.135175	0.105591	-0.128247	1.00466	0.0102115	-0.0201809	-0.469298	0.668277	-0.387418	-0.287553	0.294038	-0.137892	0.189468	-0.897307	-0.0333414	-0.183323	0.111727	0.300026	-0.163	-0.0427731	-0.438487	-0.161935
-4.29221	-0.842857	1.24109	-0.389269	-0.301258	0.576959	0.944091	-1.07816	-0.493016	-0.0290543	-0.136074	-0.400159	0.365816	-0.292541	0.0326182	-0.379052	0.291507	0.127161	0.0833968	-0.203685	-0.286172	-0.00746348	-0.662207	0.439015	0.703626	-0.439634	-0.240605	-0.486815	-0.133909	0.10604	-0.12871	1.00386	0.0100545	-0.0190368	-0.466711	0.664157	-0.388938	-0.288568	0.293736	-0.138581	0.189563	-0.897905	-0.0337219	-0.182119	0.112743	0.300052	-0.163973	-0.0440943	-0.439713	-0.161138
-4.29123	-0.843792	1.24227	-0.388612	-0.302394	0.577373	0.943364	-1.07761	-0.494334	-0.0299043	-0.136518	-0.402125	0.362911	-0.291135	0.0334165	-0.380498	0.292924	0.125692	0.0808355	-0.201734	-0.286543	-0.00511197	-0.663956	0.439569	0.704204	-0.439667	-0.241249	-0.486837	-0.132642	0.10649	-0.129172	1.00309	0.00988743	-0.0179007	-0.464122	0.66004	-0.390457	-0.289577	0.293434	-0.139278	0.189641	-0.89849	-0.0340981	-0.180921	0.113757	0.300054	-0.164957	-0.0454086	-0.440922	-0.160344
-4.29025	-0.844734	1.2435	-0.387943	-0.30353	0.577769	0.942667	-1.07704	-0.495645	-0.0307502	-0.136956	-0.404073	0.359996	-0.289734	0.0342026	-0.381942	0.294336	0.124211	0.0782651	-0.199752	-0.286929	-0.00275981	-0.665693	0.440114	0.704767	-0.439713	-0.241885	-0.486849	-0.131374	0.106941	-0.129633	1.00235	0.00971055	-0.0167726	-0.461532	0.655927	-0.391974	-0.290583	0.293134	-0.139984	0.1897	-0.899064	-0.0344701	-0.179728	0.114768	0.300031	-0.16595	-0.0467161	-0.442114	-0.159553
-4.28926	-0.845681	1.24476	-0.387261	-0.304667	0.578148	0.942	-1.07646	-0.49695	-0.0315922	-0.137388	-0.406004	0.357071	-0.288337	0.0349763	-0.383383	0.295742	0.122719	0.0756858	-0.197742	-0.287329	-0.000407256	-0.667417	0.440648	0.705315	-0.43977	-0.242514	-0.486851	-0.130106	0.107395	-0.130092	1.00163	0.00952392	-0.0156528	-0.45894	0.651818	-0.39349	-0.291583	0.292834	-0.140697	0.189741	-0.899626	-0.0348378	-0.178542	0.115777	0.299984	-0.166953	-0.0480169	-0.443288	-0.158765
-4.28828	-0.846635	1.24606	-0.386568	-0.305803	0.578509	0.941365	-1.07586	-0.498248	-0.0324301	-0.137814	-0.407916	0.354137	-0.286946	0.0357378	-0.384822	0.297143	0.121215	0.0730977	-0.195701	-0.287743	0.00194545	-0.669128	0.441172	0.705847	-0.439839	-0.243136	-0.486842	-0.128837	0.107849	-0.13055	1.00094	0.00932766	-0.0145415	-0.456347	0.647714	-0.395004	-0.292579	0.292535	-0.141419	0.189764	-0.900177	-0.0352014	-0.177361	0.116783	0.299911	-0.167965	-0.049311	-0.444445	-0.157981
-4.2873	-0.847595	1.24739	-0.385863	-0.306938	0.578853	0.94076	-1.07525	-0.499539	-0.033264	-0.138234	-0.40981	0.351193	-0.28556	0.0364869	-0.386259	0.298539	0.119701	0.070501	-0.193632	-0.288172	0.00429806	-0.670826	0.441687	0.706364	-0.439921	-0.243749	-0.486823	-0.127567	0.108305	-0.131007	1.00028	0.00912189	-0.0134388	-0.453753	0.643615	-0.396516	-0.293571	0.292236	-0.142149	0.189768	-0.900716	-0.0355606	-0.176185	0.117787	0.299815	-0.168988	-0.0505985	-0.445584	-0.157201
-4.28631	-0.848559	1.24876	-0.385146	-0.308073	0.579179	0.940187	-1.07463	-0.500823	-0.0340937	-0.138648	-0.411686	0.34824	-0.284178	0.0372236	-0.387692	0.29993	0.118176	0.0678959	-0.191533	-0.288615	0.00665033	-0.672511	0.442192	0.706866	-0.440014	-0.244355	-0.486794	-0.126298	0.108762	-0.131462	0.999648	0.00890673	-0.0123449	-0.451157	0.639522	-0.398025	-0.294557	0.291939	-0.142888	0.189754	-0.901243	-0.0359157	-0.175016	0.118787	0.299693	-0.170019	-0.0518796	-0.446705	-0.156424
-4.28533	-0.84953	1.25017	-0.384417	-0.309207	0.579488	0.939645	-1.07399	-0.502099	-0.0349194	-0.139056	-0.413543	0.345279	-0.282802	0.0379479	-0.389122	0.301316	0.11664	0.0652827	-0.189405	-0.289073	0.00900198	-0.674183	0.442687	0.707351	-0.440119	-0.244952	-0.486755	-0.125028	0.109221	-0.131915	0.999042	0.00868229	-0.01126	-0.448561	0.635433	-0.399532	-0.295538	0.291643	-0.143634	0.189721	-0.901758	-0.0362665	-0.173852	0.119785	0.299547	-0.17106	-0.0531541	-0.447809	-0.155651
-4.28435	-0.850505	1.25161	-0.383677	-0.31034	0.57978	0.939134	-1.07333	-0.503369	-0.0357409	-0.139459	-0.415381	0.342309	-0.281432	0.0386598	-0.390549	0.302696	0.115094	0.0626616	-0.187249	-0.289545	0.0113528	-0.675841	0.443172	0.707821	-0.440236	-0.245541	-0.486706	-0.123759	0.10968	-0.132367	0.998464	0.00844869	-0.0101843	-0.445964	0.631351	-0.401036	-0.296515	0.291348	-0.144388	0.189669	-0.902262	-0.0366131	-0.172694	0.120779	0.299377	-0.17211	-0.0544223	-0.448894	-0.154882
-4.28336	-0.851485	1.25309	-0.382926	-0.311471	0.580055	0.938655	-1.07266	-0.50463	-0.0365583	-0.139856	-0.417199	0.33933	-0.280066	0.0393592	-0.391972	0.30407	0.113537	0.0600327	-0.185064	-0.29003	0.0137025	-0.677486	0.443648	0.708275	-0.440366	-0.246122	-0.486647	-0.12249	0.110141	-0.132816	0.997914	0.00820604	-0.00911786	-0.443366	0.627274	-0.402537	-0.297487	0.291054	-0.14515	0.189599	-0.902753	-0.0369554	-0.171542	0.12177	0.299182	-0.173168	-0.0556842	-0.449961	-0.154117
-4.28238	-0.852469	1.2546	-0.382164	-0.3126	0.580312	0.938207	-1.07197	-0.505885	-0.0373716	-0.140247	-0.418999	0.336343	-0.278707	0.0400463	-0.393392	0.30544	0.111971	0.0573964	-0.18285	-0.290531	0.0160508	-0.679117	0.444115	0.708713	-0.440507	-0.246695	-0.486577	-0.121222	0.110602	-0.133263	0.997392	0.00795447	-0.00806096	-0.440769	0.623204	-0.404034	-0.298453	0.290761	-0.14592	0.18951	-0.903232	-0.0372935	-0.170396	0.122758	0.298962	-0.174235	-0.0569399	-0.45101	-0.153356
-4.2814	-0.853458	1.25614	-0.38139	-0.313728	0.580553	0.937791	-1.07127	-0.507131	-0.0381807	-0.140633	-0.420779	0.333348	-0.277352	0.0407208	-0.394807	0.306803	0.110394	0.0547527	-0.180608	-0.291045	0.0183975	-0.680734	0.444572	0.709134	-0.440661	-0.247259	-0.486497	-0.119955	0.111064	-0.133709	0.996897	0.0076941	-0.00701373	-0.438171	0.619141	-0.405529	-0.299414	0.290469	-0.146698	0.189402	-0.903699	-0.0376273	-0.169257	0.123743	0.298719	-0.175311	-0.0581894	-0.45204	-0.152599
-4.28041	-0.85445	1.25772	-0.380606	-0.314854	0.580777	0.937406	-1.07056	-0.50837	-0.0389855	-0.141014	-0.42254	0.330346	-0.276003	0.0413829	-0.396218	0.308161	0.108807	0.0521019	-0.178338	-0.291573	0.0207424	-0.682337	0.44502	0.709539	-0.440827	-0.247814	-0.486407	-0.118689	0.111527	-0.134151	0.996431	0.00742504	-0.00597632	-0.435573	0.615085	-0.407019	-0.300371	0.290179	-0.147484	0.189275	-0.904154	-0.037957	-0.168123	0.124724	0.29845	-0.176395	-0.0594329	-0.453052	-0.151847
-4.27943	-0.855446	1.25933	-0.379811	-0.315977	0.580984	0.937054	-1.06983	-0.509601	-0.0397862	-0.141389	-0.424281	0.327336	-0.27466	0.0420325	-0.397624	0.309514	0.107211	0.0494443	-0.17604	-0.292116	0.0230851	-0.683926	0.445458	0.709928	-0.441005	-0.24836	-0.486307	-0.117424	0.11199	-0.134591	0.995993	0.00714741	-0.00494892	-0.432975	0.611036	-0.408505	-0.301322	0.28989	-0.148278	0.189129	-0.904597	-0.0382824	-0.166995	0.125702	0.298158	-0.177488	-0.0606703	-0.454045	-0.1511
-4.27845	-0.856446	1.26098	-0.379005	-0.317097	0.581174	0.936733	-1.06908	-0.510824	-0.0405826	-0.141759	-0.426002	0.324318	-0.273323	0.0426697	-0.399026	0.310861	0.105606	0.04678	-0.173715	-0.292673	0.0254254	-0.6855	0.445888	0.7103	-0.441195	-0.248898	-0.486196	-0.116161	0.112454	-0.135029	0.995582	0.00686133	-0.00393167	-0.430377	0.606994	-0.409987	-0.302267	0.289603	-0.149079	0.188965	-0.905027	-0.0386036	-0.165874	0.126675	0.297841	-0.178588	-0.0619019	-0.45502	-0.150357
-4.27747	-0.857448	1.26266	-0.378189	-0.318215	0.581348	0.936444	-1.06832	-0.512039	-0.0413748	-0.142124	-0.427702	0.321293	-0.271992	0.0432943	-0.400423	0.312202	0.103991	0.0441093	-0.171361	-0.293244	0.0277631	-0.687061	0.446309	0.710656	-0.441397	-0.249426	-0.486076	-0.114899	0.112918	-0.135464	0.9952	0.00656694	-0.00292473	-0.42778	0.60296	-0.411465	-0.303207	0.289318	-0.149888	0.188781	-0.905445	-0.0389206	-0.164758	0.127645	0.2975	-0.179696	-0.0631277	-0.455975	-0.149618
-4.27648	-0.858454	1.26437	-0.377363	-0.319329	0.581505	0.936187	-1.06754	-0.513246	-0.0421627	-0.142483	-0.429383	0.318262	-0.270666	0.0439064	-0.401814	0.313537	0.102367	0.0414324	-0.168981	-0.293828	0.0300979	-0.688606	0.446721	0.710995	-0.441612	-0.249945	-0.485945	-0.113639	0.113383	-0.135896	0.994846	0.00626433	-0.00192828	-0.425184	0.598934	-0.412938	-0.304142	0.289033	-0.150704	0.188578	-0.905851	-0.0392334	-0.163649	0.128611	0.297134	-0.180812	-0.0643478	-0.456912	-0.148885
-4.2755	-0.859462	1.26611	-0.376526	-0.320441	0.581646	0.935963	-1.06675	-0.514445	-0.0429464	-0.142838	-0.431043	0.315223	-0.269347	0.0445061	-0.4032	0.314866	0.100734	0.0387495	-0.166573	-0.294427	0.0324296	-0.690137	0.447124	0.711317	-0.441839	-0.250455	-0.485805	-0.112381	0.113848	-0.136325	0.99452	0.00595364	-0.000942453	-0.422589	0.594917	-0.414406	-0.305071	0.288751	-0.151528	0.188356	-0.906245	-0.039542	-0.162546	0.129574	0.296745	-0.181935	-0.0655623	-0.457829	-0.148156
-4.27452	-0.860473	1.26789	-0.37568	-0.321548	0.58177	0.93577	-1.06594	-0.515635	-0.0437257	-0.143188	-0.432682	0.312179	-0.268033	0.0450932	-0.40458	0.31619	0.0990922	0.0360608	-0.164138	-0.295039	0.0347578	-0.691652	0.447518	0.711622	-0.442078	-0.250955	-0.485654	-0.111125	0.114313	-0.136751	0.994223	0.00563499	3.25855e-05	-0.419995	0.590908	-0.415869	-0.305995	0.28847	-0.15236	0.188115	-0.906625	-0.0398464	-0.161449	0.130532	0.296331	-0.183065	-0.0667712	-0.458727	-0.147433
-4.27353	-0.861486	1.2697	-0.374823	-0.322652	0.581878	0.93561	-1.06512	-0.516817	-0.0445008	-0.143533	-0.434301	0.309128	-0.266726	0.0456678	-0.405954	0.317507	0.0974421	0.0333666	-0.161677	-0.295666	0.0370824	-0.693153	0.447903	0.71191	-0.442329	-0.251446	-0.485493	-0.109871	0.114778	-0.137173	0.993953	0.0053085	0.000996685	-0.417402	0.586908	-0.417326	-0.306913	0.288192	-0.153199	0.187855	-0.906994	-0.0401467	-0.160358	0.131486	0.295893	-0.184203	-0.0679747	-0.459606	-0.146715
-4.27255	-0.8625	1.27154	-0.373957	-0.323752	0.58197	0.935482	-1.06428	-0.51799	-0.0452716	-0.143873	-0.435898	0.30607	-0.265425	0.0462299	-0.407322	0.318819	0.0957836	0.0306671	-0.159189	-0.296306	0.039403	-0.694638	0.448281	0.71218	-0.442593	-0.251927	-0.485322	-0.10862	0.115243	-0.137593	0.993712	0.00497429	0.00194969	-0.41481	0.582917	-0.418778	-0.307825	0.287915	-0.154045	0.187576	-0.90735	-0.0404428	-0.159274	0.132435	0.295431	-0.185348	-0.0691729	-0.460466	-0.146002
-4.27157	-0.863516	1.27341	-0.373081	-0.324848	0.582046	0.935387	-1.06343	-0.519155	-0.0460381	-0.144208	-0.437475	0.303007	-0.26413	0.0467795	-0.408684	0.320124	0.094117	0.0279626	-0.156675	-0.29696	0.0417194	-0.696109	0.448649	0.712434	-0.442869	-0.252398	-0.485141	-0.107372	0.115707	-0.138009	0.993499	0.00463249	0.00289147	-0.41222	0.578935	-0.420224	-0.308731	0.28764	-0.154898	0.187277	-0.907693	-0.0407348	-0.158196	0.13338	0.294946	-0.186499	-0.0703659	-0.461306	-0.145294
-4.27058	-0.864534	1.27531	-0.372196	-0.325939	0.582106	0.935324	-1.06256	-0.520311	-0.0468003	-0.144539	-0.43903	0.299939	-0.262842	0.0473167	-0.410039	0.321423	0.0924425	0.0252531	-0.154134	-0.297628	0.0440314	-0.697563	0.44901	0.71267	-0.443157	-0.252859	-0.48495	-0.106127	0.116172	-0.138421	0.993314	0.00428321	0.00382186	-0.409632	0.574964	-0.421664	-0.309632	0.287367	-0.155759	0.186959	-0.908023	-0.0410227	-0.157124	0.134321	0.294436	-0.187656	-0.0715537	-0.462127	-0.144591
-4.2696	-0.865552	1.27724	-0.371302	-0.327025	0.58215	0.935293	-1.06167	-0.521458	-0.0475581	-0.144865	-0.440564	0.296865	-0.26156	0.0478413	-0.411387	0.322716	0.0907601	0.0225391	-0.151568	-0.298309	0.0463387	-0.699002	0.449362	0.712889	-0.443457	-0.25331	-0.484749	-0.104884	0.116636	-0.13883	0.993157	0.00392657	0.00474071	-0.407046	0.571002	-0.423097	-0.310526	0.287096	-0.156627	0.186622	-0.908341	-0.0413064	-0.156059	0.135257	0.293903	-0.188821	-0.0727366	-0.462927	-0.143895
-4.26862	-0.866571	1.2792	-0.370398	-0.328106	0.582179	0.935294	-1.06078	-0.522596	-0.0483116	-0.145187	-0.442077	0.293785	-0.260285	0.0483534	-0.412728	0.324003	0.0890703	0.0198206	-0.148976	-0.299004	0.048641	-0.700425	0.449706	0.71309	-0.44377	-0.253751	-0.484538	-0.103646	0.1171	-0.139235	0.993029	0.00356272	0.0056479	-0.404462	0.56705	-0.424524	-0.311415	0.286827	-0.157502	0.186266	-0.908646	-0.0415861	-0.155	0.136189	0.293346	-0.189991	-0.0739145	-0.463709	-0.143204
-4.26764	-0.867591	1.28119	-0.369485	-0.329182	0.582191	0.935329	-1.05986	-0.523725	-0.0490607	-0.145504	-0.443568	0.290701	-0.259016	0.0488531	-0.414062	0.325283	0.087373	0.017098	-0.146359	-0.299712	0.0509381	-0.701833	0.450043	0.713273	-0.444095	-0.254181	-0.484318	-0.10241	0.117563	-0.139636	0.992928	0.00319175	0.00654328	-0.40188	0.563108	-0.425944	-0.312297	0.28656	-0.158384	0.18589	-0.908938	-0.0418618	-0.153947	0.137116	0.292765	-0.191167	-0.0750876	-0.46447	-0.142518
-4.26665	-0.868611	1.28321	-0.368563	-0.330253	0.582188	0.935395	-1.05893	-0.524845	-0.0498055	-0.145817	-0.445037	0.287612	-0.257754	0.0493403	-0.415388	0.326557	0.0856686	0.0143715	-0.143716	-0.300434	0.0532297	-0.703224	0.450371	0.713439	-0.444432	-0.254601	-0.484087	-0.101178	0.118026	-0.140033	0.992857	0.00281381	0.0074267	-0.399301	0.559178	-0.427357	-0.313173	0.286295	-0.159274	0.185496	-0.909218	-0.0421333	-0.152901	0.138038	0.292161	-0.192349	-0.076256	-0.465211	-0.141839
-4.26567	-0.869631	1.28526	-0.367633	-0.331318	0.58217	0.935494	-1.05799	-0.525956	-0.050546	-0.146126	-0.446484	0.284518	-0.256499	0.049815	-0.416707	0.327824	0.0839573	0.0116413	-0.141049	-0.30117	0.0555155	-0.704599	0.450692	0.713587	-0.444781	-0.25501	-0.483847	-0.0999507	0.118488	-0.140426	0.992813	0.002429	0.00829804	-0.396724	0.555258	-0.428763	-0.314043	0.286033	-0.16017	0.185081	-0.909484	-0.0424009	-0.151861	0.138955	0.291533	-0.193536	-0.0774198	-0.465933	-0.141165
-4.26469	-0.87065	1.28733	-0.366694	-0.332377	0.582136	0.935626	-1.05702	-0.527057	-0.0512821	-0.14643	-0.447909	0.28142	-0.25525	0.0502773	-0.418017	0.329084	0.0822392	0.00890764	-0.138357	-0.301918	0.0577953	-0.705958	0.451004	0.713717	-0.445143	-0.255409	-0.483597	-0.0987269	0.118949	-0.140814	0.992797	0.00203747	0.00915716	-0.39415	0.551349	-0.430162	-0.314907	0.285773	-0.161073	0.184648	-0.909738	-0.0426645	-0.150827	0.139868	0.290882	-0.194729	-0.0785791	-0.466634	-0.140497
-4.2637	-0.871669	1.28944	-0.365747	-0.33343	0.582087	0.93579	-1.05605	-0.528149	-0.0520138	-0.14673	-0.449311	0.278318	-0.254009	0.0507272	-0.419319	0.330338	0.0805145	0.00617079	-0.13564	-0.30268	0.0600689	-0.707301	0.45131	0.71383	-0.445516	-0.255797	-0.483337	-0.0975073	0.119409	-0.141199	0.99281	0.00163932	0.0100039	-0.391579	0.547452	-0.431552	-0.315764	0.285515	-0.161982	0.184195	-0.909978	-0.042924	-0.1498	0.140775	0.290208	-0.195927	-0.0797341	-0.467315	-0.139835
-4.26272	-0.872687	1.29157	-0.364791	-0.334476	0.582023	0.935987	-1.05506	-0.529232	-0.0527412	-0.147027	-0.450691	0.275212	-0.252774	0.0511647	-0.420613	0.331586	0.0787834	0.00343096	-0.132899	-0.303455	0.062336	-0.708626	0.451608	0.713924	-0.445902	-0.256173	-0.483067	-0.0962922	0.119869	-0.141579	0.992851	0.00123469	0.0108382	-0.389011	0.543566	-0.432935	-0.316615	0.28526	-0.162899	0.183723	-0.910206	-0.0431797	-0.148779	0.141677	0.28951	-0.19713	-0.0808849	-0.467976	-0.13918
-4.26174	-0.873704	1.29373	-0.363828	-0.335516	0.581944	0.936216	-1.05405	-0.530305	-0.0534642	-0.147319	-0.452049	0.272103	-0.251547	0.0515897	-0.421897	0.332826	0.0770462	0.000688399	-0.130134	-0.304244	0.0645962	-0.709936	0.451898	0.714	-0.4463	-0.256539	-0.482788	-0.0950816	0.120327	-0.141954	0.99292	0.000823688	0.0116599	-0.386447	0.539692	-0.434309	-0.317459	0.285007	-0.163822	0.183231	-0.910421	-0.0434314	-0.147764	0.142574	0.288789	-0.198338	-0.0820315	-0.468616	-0.138531
-4.26075	-0.87472	1.29592	-0.362856	-0.336549	0.581849	0.936478	-1.05303	-0.531368	-0.0541829	-0.147608	-0.453384	0.268989	-0.250327	0.0520024	-0.423173	0.334059	0.0753031	-0.00205665	-0.127345	-0.305045	0.0668494	-0.711228	0.452181	0.714058	-0.446711	-0.256894	-0.4825	-0.0938758	0.120784	-0.142325	0.993017	0.000406453	0.0124688	-0.383886	0.53583	-0.435675	-0.318297	0.284757	-0.164752	0.18272	-0.910622	-0.0436792	-0.146756	0.143466	0.288045	-0.19955	-0.0831741	-0.469237	-0.137888
-4.25977	-0.875734	1.29813	-0.361876	-0.337575	0.58174	0.936773	-1.05199	-0.532422	-0.0548972	-0.147892	-0.454697	0.265873	-0.249113	0.0524027	-0.42444	0.335286	0.0735542	-0.00480394	-0.124533	-0.30586	0.0690953	-0.712503	0.452458	0.714098	-0.447133	-0.257237	-0.482201	-0.092675	0.12124	-0.14269	0.993143	-1.68973e-05	0.0132648	-0.381329	0.531981	-0.437033	-0.319127	0.284509	-0.165689	0.18219	-0.910811	-0.0439231	-0.145754	0.144352	0.287279	-0.200767	-0.0843129	-0.469836	-0.137251
-4.25879	-0.876746	1.30037	-0.360889	-0.338594	0.581616	0.9371	-1.05094	-0.533466	-0.0556071	-0.148173	-0.455986	0.262753	-0.247908	0.0527907	-0.425697	0.336505	0.0717998	-0.00755323	-0.121697	-0.306687	0.0713337	-0.713762	0.452727	0.714119	-0.447568	-0.257568	-0.481894	-0.0914792	0.121694	-0.143052	0.993296	-0.000446238	0.0140479	-0.378776	0.528144	-0.438381	-0.319952	0.284264	-0.166632	0.18164	-0.910986	-0.0441632	-0.144759	0.145233	0.286489	-0.201988	-0.0854478	-0.470416	-0.136621
-4.2578	-0.877755	1.30263	-0.359894	-0.339605	0.581478	0.937459	-1.04987	-0.5345	-0.0563127	-0.14845	-0.457253	0.259631	-0.246709	0.0531664	-0.426944	0.337717	0.0700401	-0.0103043	-0.118838	-0.307528	0.0735642	-0.715003	0.452989	0.714123	-0.448014	-0.257888	-0.481577	-0.0902888	0.122148	-0.143408	0.993478	-0.000881444	0.0148179	-0.376227	0.52432	-0.439721	-0.320769	0.284021	-0.167581	0.181071	-0.911148	-0.0443995	-0.143769	0.146109	0.285677	-0.203213	-0.0865792	-0.470975	-0.135998
-4.25682	-0.878762	1.30492	-0.358892	-0.340608	0.581324	0.937851	-1.04879	-0.535524	-0.057014	-0.148724	-0.458496	0.256505	-0.245518	0.0535297	-0.428181	0.338922	0.0682752	-0.0130569	-0.115957	-0.308381	0.0757866	-0.716227	0.453244	0.714107	-0.448473	-0.258197	-0.48125	-0.0891038	0.122599	-0.143759	0.993687	-0.00132239	0.0155747	-0.373682	0.520508	-0.441051	-0.321579	0.283781	-0.168537	0.180483	-0.911297	-0.044632	-0.142787	0.146979	0.284842	-0.204441	-0.087707	-0.471513	-0.135381
-4.25584	-0.879767	1.30724	-0.357883	-0.341604	0.581157	0.938275	-1.04769	-0.536538	-0.0577109	-0.148994	-0.459716	0.253378	-0.244334	0.0538808	-0.429409	0.340119	0.0665055	-0.0158107	-0.113053	-0.309247	0.0780007	-0.717433	0.453493	0.714074	-0.448944	-0.258493	-0.480914	-0.0879245	0.123049	-0.144104	0.993925	-0.00176896	0.0163181	-0.371142	0.51671	-0.442372	-0.322382	0.283544	-0.169499	0.179875	-0.911433	-0.0448608	-0.14181	0.147843	0.283984	-0.205673	-0.0888314	-0.47203	-0.134771
-4.25486	-0.880768	1.30958	-0.356866	-0.342591	0.580975	0.938732	-1.04657	-0.537541	-0.0584034	-0.149261	-0.460913	0.250248	-0.243158	0.0542197	-0.430626	0.341309	0.0647311	-0.0185655	-0.110127	-0.310125	0.0802062	-0.718622	0.453735	0.714022	-0.449426	-0.258778	-0.480569	-0.086751	0.123497	-0.144445	0.99419	-0.00222102	0.017048	-0.368606	0.512926	-0.443682	-0.323179	0.28331	-0.170467	0.179248	-0.911555	-0.0450858	-0.14084	0.148701	0.283104	-0.206909	-0.0899526	-0.472527	-0.134168
-4.25387	-0.881766	1.31194	-0.355843	-0.343569	0.580778	0.939221	-1.04544	-0.538535	-0.0590916	-0.149524	-0.462086	0.247116	-0.24199	0.0545463	-0.431832	0.342492	0.0629522	-0.0213212	-0.107179	-0.311017	0.0824028	-0.719793	0.453971	0.713951	-0.449921	-0.25905	-0.480215	-0.0855835	0.123944	-0.14478	0.994484	-0.00267844	0.0177644	-0.366075	0.509155	-0.444983	-0.323968	0.283078	-0.171442	0.178602	-0.911664	-0.0453072	-0.139876	0.149554	0.282202	-0.208147	-0.0910706	-0.473003	-0.133572
-4.25289	-0.88276	1.31433	-0.354813	-0.344539	0.580568	0.939743	-1.0443	-0.539518	-0.0597755	-0.149784	-0.463235	0.243982	-0.240829	0.0548608	-0.433027	0.343667	0.0611691	-0.0240773	-0.104209	-0.31192	0.0845904	-0.720946	0.4542	0.713862	-0.450427	-0.259311	-0.479852	-0.0844221	0.124389	-0.14511	0.994805	-0.00314112	0.0184672	-0.363549	0.505398	-0.446274	-0.32475	0.282849	-0.172422	0.177937	-0.91176	-0.0455249	-0.138919	0.150401	0.281278	-0.209389	-0.0921857	-0.473458	-0.132982
-4.25191	-0.883751	1.31674	-0.353776	-0.3455	0.580343	0.940296	-1.04314	-0.540491	-0.060455	-0.150041	-0.464361	0.240847	-0.239676	0.0551631	-0.434212	0.344834	0.0593819	-0.0268337	-0.101218	-0.312836	0.0867685	-0.722081	0.454424	0.713754	-0.450946	-0.259559	-0.47948	-0.0832671	0.124832	-0.145434	0.995154	-0.00360891	0.0191561	-0.361028	0.501655	-0.447554	-0.325524	0.282624	-0.173409	0.177252	-0.911843	-0.045739	-0.137967	0.151243	0.280332	-0.210633	-0.0932978	-0.473892	-0.1324
-4.25092	-0.884737	1.31917	-0.352733	-0.346452	0.580105	0.940882	-1.04196	-0.541453	-0.0611303	-0.150294	-0.465463	0.23771	-0.23853	0.0554533	-0.435384	0.345993	0.0575909	-0.0295902	-0.098205	-0.313765	0.088937	-0.723199	0.454641	0.713627	-0.451476	-0.259794	-0.479098	-0.0821186	0.125272	-0.145752	0.995531	-0.0040817	0.0198312	-0.358512	0.497926	-0.448824	-0.326291	0.282401	-0.174401	0.176548	-0.911912	-0.0459495	-0.137022	0.152078	0.279363	-0.21188	-0.0944073	-0.474306	-0.131824
-4.24994	-0.885719	1.32163	-0.351683	-0.347395	0.579853	0.941501	-1.04077	-0.542405	-0.0618012	-0.150544	-0.466542	0.234573	-0.237393	0.0557314	-0.436546	0.347145	0.0557963	-0.0323464	-0.0951717	-0.314706	0.0910957	-0.724298	0.454852	0.713482	-0.452018	-0.260017	-0.478708	-0.0809767	0.125711	-0.146065	0.995935	-0.00455937	0.0204923	-0.356002	0.494211	-0.450083	-0.327051	0.282181	-0.1754	0.175825	-0.911968	-0.0461565	-0.136083	0.152907	0.278373	-0.213129	-0.0955141	-0.474698	-0.131256
-4.24896	-0.886696	1.32411	-0.350628	-0.348328	0.579587	0.942151	-1.03956	-0.543346	-0.0624679	-0.150792	-0.467596	0.231434	-0.236263	0.0559974	-0.437695	0.348288	0.0539983	-0.0351022	-0.0921177	-0.315658	0.0932442	-0.725379	0.455057	0.713318	-0.452572	-0.260228	-0.478309	-0.0798416	0.126147	-0.146372	0.996367	-0.00504178	0.0211393	-0.353497	0.490512	-0.451331	-0.327803	0.281964	-0.176404	0.175083	-0.91201	-0.04636	-0.135151	0.15373	0.277361	-0.21438	-0.0966185	-0.47507	-0.130695
-4.24797	-0.887668	1.32661	-0.349566	-0.349251	0.579307	0.942833	-1.03834	-0.544277	-0.0631302	-0.151036	-0.468626	0.228294	-0.235142	0.0562514	-0.438833	0.349424	0.0521972	-0.0378572	-0.0890433	-0.316623	0.0953823	-0.726441	0.455257	0.713135	-0.453138	-0.260426	-0.477901	-0.0787135	0.126582	-0.146673	0.996826	-0.00552882	0.0217721	-0.350999	0.486827	-0.452567	-0.328547	0.28175	-0.177415	0.174322	-0.912039	-0.04656	-0.134224	0.154547	0.276328	-0.215632	-0.0977205	-0.47542	-0.130141
-4.24699	-0.888635	1.32913	-0.348498	-0.350164	0.579014	0.943547	-1.0371	-0.545197	-0.0637883	-0.151278	-0.469632	0.225154	-0.234029	0.0564934	-0.439958	0.350551	0.0503931	-0.0406112	-0.085949	-0.3176	0.0975098	-0.727485	0.455451	0.712933	-0.453715	-0.260611	-0.477485	-0.0775926	0.127013	-0.146968	0.997313	-0.00602035	0.0223906	-0.348506	0.483157	-0.453792	-0.329284	0.281539	-0.17843	0.173541	-0.912055	-0.0467566	-0.133304	0.155358	0.275273	-0.216887	-0.0988204	-0.475749	-0.129594
-4.24601	-0.889596	1.33167	-0.347425	-0.351067	0.578707	0.944293	-1.03585	-0.546105	-0.0644421	-0.151516	-0.470614	0.222013	-0.232923	0.0567234	-0.441071	0.35167	0.0485862	-0.043364	-0.0828348	-0.318589	0.0996263	-0.72851	0.455639	0.712712	-0.454304	-0.260782	-0.47706	-0.076479	0.127443	-0.147257	0.997827	-0.00651627	0.0229948	-0.346019	0.479502	-0.455005	-0.330013	0.281331	-0.179452	0.172742	-0.912057	-0.0469499	-0.13239	0.156163	0.274197	-0.218143	-0.0999181	-0.476058	-0.129055
-4.24503	-0.890552	1.33423	-0.346346	-0.35196	0.578387	0.945071	-1.03458	-0.547003	-0.0650917	-0.151752	-0.471571	0.218873	-0.231826	0.0569415	-0.442171	0.35278	0.0467769	-0.0461153	-0.0797012	-0.31959	0.101732	-0.729517	0.455822	0.712473	-0.454904	-0.260941	-0.476626	-0.0753728	0.12787	-0.14754	0.998369	-0.00701644	0.0235845	-0.343539	0.475863	-0.456207	-0.330734	0.281126	-0.180479	0.171924	-0.912045	-0.0471398	-0.131482	0.156961	0.2731	-0.2194	-0.101014	-0.476345	-0.128524
-4.24404	-0.891502	1.33681	-0.345261	-0.352842	0.578054	0.945881	-1.0333	-0.54789	-0.065737	-0.151985	-0.472504	0.215732	-0.230737	0.0571478	-0.443258	0.353882	0.0449653	-0.0488649	-0.0765483	-0.320602	0.103826	-0.730504	0.456	0.712215	-0.455516	-0.261087	-0.476184	-0.0742743	0.128294	-0.147816	0.998937	-0.00752074	0.0241597	-0.341065	0.47224	-0.457396	-0.331447	0.280925	-0.181512	0.171086	-0.912021	-0.0473264	-0.13058	0.157754	0.271982	-0.220658	-0.102108	-0.476611	-0.127999
-4.24306	-0.892445	1.33941	-0.344172	-0.353713	0.577708	0.946722	-1.032	-0.548766	-0.0663782	-0.152216	-0.473413	0.212591	-0.229657	0.0573422	-0.444332	0.354975	0.0431517	-0.0516124	-0.0733766	-0.321627	0.105908	-0.731473	0.456173	0.711937	-0.45614	-0.261219	-0.475734	-0.0731835	0.128716	-0.148086	0.999533	-0.00802905	0.0247202	-0.338598	0.468632	-0.458573	-0.332152	0.280726	-0.18255	0.17023	-0.911982	-0.0475097	-0.129684	0.158539	0.270843	-0.221917	-0.103201	-0.476856	-0.127483
-4.24208	-0.893381	1.34202	-0.343077	-0.354572	0.577348	0.947595	-1.03069	-0.549631	-0.0670151	-0.152444	-0.474296	0.209451	-0.228584	0.0575248	-0.445393	0.35606	0.0413362	-0.0543577	-0.0701862	-0.322662	0.107979	-0.732423	0.45634	0.711641	-0.456774	-0.261338	-0.475275	-0.0721007	0.129135	-0.14835	1.00016	-0.00854125	0.025266	-0.336138	0.46504	-0.459737	-0.332849	0.280531	-0.183594	0.169355	-0.91193	-0.0476899	-0.128794	0.159319	0.269683	-0.223176	-0.104291	-0.47708	-0.126973
-4.24109	-0.894311	1.34466	-0.341977	-0.355421	0.576976	0.948499	-1.02936	-0.550485	-0.0676478	-0.152669	-0.475156	0.206312	-0.227521	0.0576957	-0.446439	0.357135	0.0395191	-0.0571005	-0.0669775	-0.323709	0.110037	-0.733353	0.456503	0.711326	-0.45742	-0.261444	-0.474808	-0.071026	0.129551	-0.148607	1.00081	-0.0090572	0.025797	-0.333684	0.461464	-0.460889	-0.333537	0.280339	-0.184642	0.168461	-0.911865	-0.0478669	-0.12791	0.160091	0.268503	-0.224436	-0.105381	-0.477283	-0.126472
-4.24011	-0.895234	1.34731	-0.340872	-0.356258	0.576591	0.949435	-1.02801	-0.551328	-0.0682764	-0.152892	-0.47599	0.203174	-0.226465	0.0578548	-0.447472	0.358202	0.0377006	-0.0598406	-0.0637508	-0.324768	0.112083	-0.734264	0.456661	0.710992	-0.458078	-0.261536	-0.474333	-0.0699595	0.129964	-0.148858	1.00148	-0.0095768	0.0263131	-0.331238	0.457905	-0.462028	-0.334218	0.280151	-0.185696	0.167548	-0.911786	-0.0480409	-0.127032	0.160858	0.267302	-0.225696	-0.106469	-0.477464	-0.125978
-4.23913	-0.896149	1.34999	-0.339763	-0.357083	0.576193	0.950402	-1.02665	-0.552159	-0.0689008	-0.153113	-0.4768	0.200036	-0.225418	0.0580023	-0.448491	0.35926	0.035881	-0.0625776	-0.0605064	-0.325837	0.114116	-0.735156	0.456814	0.710639	-0.458746	-0.261614	-0.47385	-0.0689014	0.130374	-0.149102	1.00219	-0.0100999	0.0268142	-0.3288	0.454362	-0.463153	-0.334889	0.279965	-0.186756	0.166617	-0.911693	-0.0482117	-0.12616	0.161617	0.266081	-0.226955	-0.107557	-0.477625	-0.125492
-4.23814	-0.897056	1.35267	-0.338649	-0.357897	0.575783	0.9514	-1.02528	-0.552979	-0.0695211	-0.153331	-0.477584	0.1969	-0.22438	0.0581381	-0.449496	0.360308	0.0340604	-0.0653113	-0.0572446	-0.326918	0.116136	-0.736029	0.456963	0.710267	-0.459426	-0.261678	-0.473359	-0.0678519	0.130781	-0.149339	1.00292	-0.0106264	0.0273003	-0.326368	0.450836	-0.464265	-0.335553	0.279783	-0.18782	0.165667	-0.911587	-0.0483796	-0.125293	0.16237	0.26484	-0.228215	-0.108643	-0.477764	-0.125014
-4.23716	-0.897955	1.35538	-0.337531	-0.358698	0.57536	0.952429	-1.02389	-0.553787	-0.0701373	-0.153547	-0.478344	0.193765	-0.22335	0.0582624	-0.450486	0.361348	0.0322391	-0.0680415	-0.0539656	-0.32801	0.118144	-0.736881	0.457107	0.709875	-0.460117	-0.261728	-0.47286	-0.066811	0.131185	-0.149569	1.00367	-0.0111562	0.0277713	-0.323945	0.447326	-0.465364	-0.336208	0.279604	-0.18889	0.164699	-0.911467	-0.0485445	-0.124433	0.163117	0.263579	-0.229473	-0.109729	-0.477882	-0.124543
-4.23618	-0.898847	1.3581	-0.336409	-0.359487	0.574925	0.953489	-1.02248	-0.554584	-0.0707494	-0.153761	-0.479079	0.190632	-0.222329	0.0583751	-0.451461	0.362378	0.0304173	-0.0707679	-0.0506698	-0.329113	0.120137	-0.737714	0.457248	0.709465	-0.460818	-0.261765	-0.472353	-0.0657789	0.131586	-0.149793	1.00446	-0.0116891	0.0282272	-0.321529	0.443834	-0.466449	-0.336854	0.279429	-0.189964	0.163711	-0.911333	-0.0487064	-0.123578	0.163857	0.262298	-0.230731	-0.110814	-0.477979	-0.124081
-4.23519	-0.899729	1.36084	-0.335282	-0.360264	0.574478	0.954579	-1.02106	-0.555369	-0.0713574	-0.153972	-0.479788	0.187501	-0.221317	0.0584764	-0.452422	0.363398	0.0285953	-0.0734902	-0.0473575	-0.330227	0.122118	-0.738528	0.457383	0.709036	-0.461531	-0.261787	-0.471839	-0.0647559	0.131984	-0.15001	1.00526	-0.0122251	0.0286677	-0.319122	0.440358	-0.46752	-0.337492	0.279256	-0.191043	0.162706	-0.911187	-0.0488656	-0.122729	0.16459	0.260997	-0.231988	-0.111898	-0.478054	-0.123626
-4.23421	-0.900603	1.36359	-0.334152	-0.361027	0.574019	0.9557	-1.01963	-0.556143	-0.0719614	-0.154182	-0.480473	0.184372	-0.220314	0.0585662	-0.453367	0.364409	0.0267733	-0.0762082	-0.044029	-0.331351	0.124084	-0.739321	0.457515	0.708588	-0.462254	-0.261795	-0.471317	-0.0637419	0.132378	-0.150219	1.0061	-0.012764	0.029093	-0.316722	0.4369	-0.468577	-0.338121	0.279088	-0.192128	0.161682	-0.911026	-0.0490219	-0.121886	0.165316	0.259678	-0.233244	-0.112982	-0.478109	-0.123179
-4.23323	-0.901468	1.36635	-0.333017	-0.361778	0.573547	0.956852	-1.01817	-0.556905	-0.0725614	-0.154389	-0.481132	0.181245	-0.219319	0.0586446	-0.454296	0.36541	0.0249514	-0.0789216	-0.0406846	-0.332486	0.126036	-0.740095	0.457643	0.708121	-0.462988	-0.261789	-0.470788	-0.0627372	0.132769	-0.150422	1.00696	-0.0133056	0.0295029	-0.314331	0.433459	-0.469619	-0.338741	0.278922	-0.193217	0.16064	-0.910852	-0.0491755	-0.121048	0.166035	0.258338	-0.234499	-0.114066	-0.478142	-0.12274
-4.23225	-0.902324	1.36913	-0.33188	-0.362516	0.573064	0.958034	-1.01671	-0.557655	-0.0731573	-0.154595	-0.481766	0.178121	-0.218333	0.0587117	-0.45521	0.366401	0.02313	-0.0816303	-0.0373246	-0.333632	0.127974	-0.740848	0.457768	0.707635	-0.463733	-0.261768	-0.470251	-0.0617419	0.133156	-0.150617	1.00785	-0.01385	0.0298973	-0.311948	0.430036	-0.470647	-0.339352	0.27876	-0.19431	0.159579	-0.910664	-0.0493263	-0.120216	0.166748	0.25698	-0.235751	-0.11515	-0.478154	-0.122309
-4.23126	-0.90317	1.37193	-0.330738	-0.36324	0.572568	0.959246	-1.01523	-0.558394	-0.0737493	-0.154798	-0.482375	0.174999	-0.217356	0.0587675	-0.456108	0.367383	0.0213092	-0.0843338	-0.0339493	-0.334788	0.129897	-0.741581	0.457888	0.70713	-0.464489	-0.261733	-0.469708	-0.0607562	0.13354	-0.150806	1.00876	-0.0143968	0.0302762	-0.309574	0.426631	-0.47166	-0.339954	0.278601	-0.195409	0.158501	-0.910463	-0.0494746	-0.119389	0.167454	0.255603	-0.237002	-0.116234	-0.478145	-0.121887
-4.23028	-0.904006	1.37473	-0.329593	-0.363951	0.572061	0.960489	-1.01373	-0.559121	-0.0743374	-0.155	-0.482959	0.17188	-0.216389	0.058812	-0.45699	0.368354	0.0194893	-0.087032	-0.0305591	-0.335954	0.131806	-0.742294	0.458005	0.706606	-0.465255	-0.261683	-0.469157	-0.0597801	0.13392	-0.150987	1.0097	-0.0149462	0.0306396	-0.307209	0.423243	-0.472658	-0.340547	0.278446	-0.196512	0.157404	-0.910247	-0.0496202	-0.118568	0.168153	0.254207	-0.238251	-0.117318	-0.478115	-0.121472
-4.2293	-0.904832	1.37755	-0.328446	-0.364648	0.571543	0.961761	-1.01222	-0.559836	-0.0749215	-0.1552	-0.483517	0.168764	-0.21543	0.0588454	-0.457856	0.369315	0.0176705	-0.0897246	-0.0271542	-0.33713	0.133699	-0.742987	0.458119	0.706063	-0.466031	-0.261618	-0.468598	-0.0588138	0.134297	-0.15116	1.01067	-0.0154978	0.0309873	-0.304853	0.419873	-0.473642	-0.34113	0.278294	-0.197619	0.156289	-0.910019	-0.0497633	-0.117752	0.168845	0.252792	-0.239497	-0.118403	-0.478064	-0.121065
-4.22831	-0.905648	1.38038	-0.327295	-0.365331	0.571012	0.963063	-1.0107	-0.560538	-0.0755017	-0.155398	-0.484049	0.165652	-0.21448	0.0588677	-0.458705	0.370266	0.015853	-0.0924113	-0.023735	-0.338317	0.135577	-0.743659	0.458229	0.705502	-0.466818	-0.261539	-0.468033	-0.0578574	0.13467	-0.151326	1.01166	-0.0160516	0.0313194	-0.302506	0.416522	-0.47461	-0.341705	0.278146	-0.198731	0.155156	-0.909777	-0.049904	-0.116942	0.169529	0.251359	-0.240741	-0.119488	-0.477991	-0.120667
-4.22733	-0.906453	1.38323	-0.326141	-0.366	0.570471	0.964395	-1.00916	-0.561229	-0.0760781	-0.155595	-0.484557	0.162543	-0.213539	0.0588788	-0.459538	0.371207	0.0140371	-0.0950919	-0.0203019	-0.339514	0.13744	-0.744311	0.458336	0.704921	-0.467615	-0.261445	-0.467462	-0.0569111	0.135039	-0.151485	1.01267	-0.0166074	0.0316358	-0.300169	0.413189	-0.475562	-0.34227	0.278001	-0.199847	0.154006	-0.909521	-0.0500422	-0.116137	0.170207	0.249908	-0.241982	-0.120574	-0.477898	-0.120277
-4.22635	-0.907248	1.38608	-0.324984	-0.366655	0.569918	0.965756	-1.0076	-0.561908	-0.0766507	-0.155789	-0.485039	0.159437	-0.212608	0.058879	-0.460354	0.372136	0.012223	-0.0977661	-0.016855	-0.34072	0.139287	-0.744942	0.45844	0.704322	-0.468422	-0.261336	-0.466883	-0.055975	0.135404	-0.151637	1.01371	-0.0171652	0.0319364	-0.297841	0.409874	-0.476499	-0.342825	0.277859	-0.200968	0.152837	-0.909251	-0.0501781	-0.115337	0.170878	0.248438	-0.243221	-0.121661	-0.477783	-0.119894
-4.22536	-0.908031	1.38895	-0.323825	-0.367295	0.569354	0.967146	-1.00603	-0.562575	-0.0772194	-0.155983	-0.485495	0.156335	-0.211685	0.0588682	-0.461152	0.373056	0.0104109	-0.100434	-0.0133947	-0.341936	0.141118	-0.745552	0.458541	0.703703	-0.469239	-0.261212	-0.466298	-0.0550491	0.135765	-0.151781	1.01478	-0.0177249	0.0322213	-0.295522	0.406577	-0.47742	-0.343372	0.277721	-0.202093	0.151651	-0.908968	-0.0503117	-0.114542	0.171542	0.246951	-0.244456	-0.122748	-0.477648	-0.119521
-4.22438	-0.908803	1.39182	-0.322663	-0.367921	0.568779	0.968565	-1.00445	-0.56323	-0.0777844	-0.156174	-0.485926	0.153237	-0.210772	0.0588465	-0.461933	0.373964	0.00860101	-0.103094	-0.00992143	-0.343162	0.142932	-0.746142	0.45864	0.703066	-0.470066	-0.261073	-0.465706	-0.0541338	0.136123	-0.151917	1.01587	-0.0182863	0.0324902	-0.293214	0.4033	-0.478325	-0.343908	0.277586	-0.203222	0.150448	-0.908672	-0.050443	-0.113752	0.172199	0.245446	-0.245687	-0.123837	-0.477492	-0.119155
-4.2234	-0.909563	1.39471	-0.321499	-0.368532	0.568192	0.970013	-1.00285	-0.563873	-0.0783456	-0.156364	-0.486331	0.150144	-0.209868	0.0588139	-0.462697	0.374862	0.00679362	-0.105748	-0.00643543	-0.344398	0.14473	-0.746711	0.458735	0.702411	-0.470903	-0.260918	-0.465108	-0.0532289	0.136476	-0.152045	1.01698	-0.0188492	0.0327433	-0.290915	0.400041	-0.479213	-0.344435	0.277455	-0.204355	0.149227	-0.908361	-0.0505722	-0.112968	0.172848	0.243924	-0.246915	-0.124927	-0.477314	-0.118798
-4.22242	-0.910312	1.3976	-0.320333	-0.369128	0.567595	0.97149	-1.00123	-0.564503	-0.0789031	-0.156553	-0.486711	0.147054	-0.208974	0.0587706	-0.463443	0.375748	0.00498893	-0.108394	-0.00293702	-0.345642	0.146512	-0.747258	0.458828	0.701736	-0.47175	-0.260748	-0.464503	-0.0523348	0.136825	-0.152166	1.01812	-0.0194137	0.0329804	-0.288626	0.396801	-0.480086	-0.344952	0.277327	-0.205493	0.147988	-0.908038	-0.0506992	-0.112188	0.173491	0.242384	-0.248139	-0.126019	-0.477116	-0.118448
-4.22143	-0.911048	1.4005	-0.319164	-0.369709	0.566988	0.972996	-0.999603	-0.565121	-0.0794569	-0.15674	-0.487065	0.14397	-0.208089	0.0587165	-0.46417	0.376624	0.00318716	-0.111032	0.000573452	-0.346896	0.148276	-0.747785	0.458919	0.701043	-0.472607	-0.260563	-0.463893	-0.0514515	0.13717	-0.15228	1.01928	-0.0199795	0.0332016	-0.286348	0.39358	-0.480941	-0.345459	0.277202	-0.206634	0.146732	-0.9077	-0.0508242	-0.111414	0.174126	0.240828	-0.249359	-0.127112	-0.476897	-0.118108
-4.22045	-0.911772	1.40341	-0.317994	-0.370274	0.566369	0.97453	-0.997959	-0.565727	-0.0800071	-0.156926	-0.487393	0.14089	-0.207213	0.0586517	-0.46488	0.377488	0.00138854	-0.113663	0.00409567	-0.34816	0.150024	-0.748291	0.459008	0.700331	-0.473473	-0.260363	-0.463276	-0.050579	0.137511	-0.152385	1.02047	-0.0205465	0.0334067	-0.28408	0.390378	-0.481781	-0.345957	0.277081	-0.207779	0.145459	-0.907349	-0.0509472	-0.110644	0.174754	0.239254	-0.250575	-0.128207	-0.476658	-0.117775
-4.21947	-0.912483	1.40633	-0.316822	-0.370824	0.56574	0.976092	-0.996301	-0.56632	-0.0805537	-0.15711	-0.487696	0.137815	-0.206346	0.0585764	-0.465571	0.378341	-0.000406702	-0.116285	0.0076293	-0.349432	0.151754	-0.748775	0.459094	0.699601	-0.474348	-0.260147	-0.462653	-0.0497176	0.137848	-0.152483	1.02168	-0.0211147	0.0335959	-0.281823	0.387195	-0.482603	-0.346444	0.276964	-0.208929	0.144169	-0.906985	-0.0510683	-0.109879	0.175375	0.237663	-0.251786	-0.129304	-0.476397	-0.117451
-4.21848	-0.913182	1.40926	-0.315648	-0.371358	0.5651	0.977682	-0.994629	-0.566901	-0.0810967	-0.157294	-0.487974	0.134745	-0.205489	0.0584905	-0.466244	0.379182	-0.00219834	-0.118899	0.011174	-0.350713	0.153466	-0.749239	0.459178	0.698852	-0.475233	-0.259915	-0.462025	-0.0488674	0.138181	-0.152573	1.02292	-0.0216839	0.0337689	-0.279576	0.384032	-0.483408	-0.346921	0.276849	-0.210082	0.142862	-0.906607	-0.0511875	-0.109119	0.175989	0.236056	-0.252992	-0.130402	-0.476116	-0.117135
-4.2175	-0.913867	1.41219	-0.314473	-0.371877	0.564451	0.9793	-0.992942	-0.56747	-0.0816361	-0.157476	-0.488226	0.13168	-0.204642	0.0583941	-0.466898	0.380012	-0.00398615	-0.121504	0.0147295	-0.352003	0.155161	-0.749681	0.45926	0.698084	-0.476127	-0.259668	-0.46139	-0.0480284	0.138509	-0.152655	1.02418	-0.0222539	0.0339259	-0.27734	0.380888	-0.484196	-0.347388	0.276739	-0.211238	0.141538	-0.906215	-0.0513049	-0.108363	0.176596	0.234433	-0.254194	-0.131503	-0.475814	-0.116828
-4.21652	-0.914539	1.41513	-0.313297	-0.372379	0.56379	0.980945	-0.99124	-0.568026	-0.0821721	-0.157656	-0.488452	0.128621	-0.203803	0.0582872	-0.467533	0.38083	-0.00576991	-0.124101	0.0182954	-0.353301	0.156838	-0.750101	0.459341	0.697299	-0.47703	-0.259405	-0.460751	-0.0472007	0.138832	-0.152729	1.02546	-0.0228248	0.0340668	-0.275116	0.377763	-0.484966	-0.347845	0.276631	-0.212399	0.140198	-0.905811	-0.0514206	-0.107612	0.177195	0.232794	-0.25539	-0.132607	-0.475492	-0.116528
-4.21553	-0.915197	1.41808	-0.312119	-0.372865	0.56312	0.982618	-0.989525	-0.56857	-0.0827046	-0.157836	-0.488652	0.125568	-0.202975	0.05817	-0.468149	0.381636	-0.0075494	-0.126688	0.0218714	-0.354609	0.158497	-0.7505	0.45942	0.696494	-0.477942	-0.259126	-0.460105	-0.0463845	0.139152	-0.152795	1.02677	-0.0233963	0.0341915	-0.272902	0.374658	-0.485719	-0.348291	0.276527	-0.213563	0.13884	-0.905392	-0.0515346	-0.106866	0.177787	0.231139	-0.256581	-0.133712	-0.475149	-0.116238
-4.21455	-0.915842	1.42103	-0.31094	-0.373335	0.56244	0.984318	-0.987795	-0.569101	-0.0832336	-0.158014	-0.488827	0.12252	-0.202156	0.0580425	-0.468745	0.38243	-0.00932438	-0.129265	0.0254571	-0.355924	0.160137	-0.750878	0.459497	0.695672	-0.478864	-0.258831	-0.459455	-0.0455799	0.139467	-0.152853	1.0281	-0.0239684	0.0343001	-0.2707	0.371573	-0.486455	-0.348728	0.276426	-0.21473	0.137466	-0.90496	-0.051647	-0.106124	0.178372	0.229468	-0.257766	-0.134821	-0.474786	-0.115955
-4.21357	-0.916472	1.42398	-0.309761	-0.373789	0.561749	0.986045	-0.986051	-0.56962	-0.0837593	-0.158192	-0.488976	0.119478	-0.201346	0.0579048	-0.469322	0.383212	-0.0110946	-0.131833	0.0290523	-0.357248	0.161758	-0.751234	0.459573	0.694831	-0.479793	-0.25852	-0.458799	-0.0447869	0.139777	-0.152903	1.02945	-0.0245409	0.0343924	-0.268509	0.368508	-0.487172	-0.349153	0.276329	-0.215901	0.136076	-0.904515	-0.0517579	-0.105386	0.178949	0.227781	-0.258946	-0.135932	-0.474403	-0.115681
-4.21258	-0.917088	1.42694	-0.30858	-0.374225	0.561049	0.987798	-0.984292	-0.570126	-0.0842816	-0.158368	-0.4891	0.116443	-0.200547	0.0577569	-0.469879	0.383982	-0.0128599	-0.134391	0.0326565	-0.35858	0.163361	-0.751568	0.459647	0.693972	-0.480732	-0.258193	-0.458137	-0.0440058	0.140083	-0.152946	1.03083	-0.0251138	0.0344686	-0.26633	0.365462	-0.487871	-0.349568	0.276235	-0.217076	0.134669	-0.904056	-0.0518673	-0.104653	0.179519	0.22608	-0.260119	-0.137046	-0.473999	-0.115416
-4.2116	-0.91769	1.4299	-0.307399	-0.374645	0.560339	0.989578	-0.98252	-0.570619	-0.0848006	-0.158543	-0.489198	0.113414	-0.199756	0.0575989	-0.470417	0.384739	-0.0146201	-0.136938	0.0362695	-0.35992	0.164944	-0.75188	0.45972	0.693095	-0.481679	-0.257851	-0.457471	-0.0432364	0.140384	-0.15298	1.03222	-0.0256869	0.0345286	-0.264163	0.362437	-0.488553	-0.349973	0.276144	-0.218254	0.133246	-0.903584	-0.0519753	-0.103924	0.180082	0.224363	-0.261287	-0.138163	-0.473575	-0.115158
-4.21062	-0.918276	1.43287	-0.306217	-0.375049	0.55962	0.991385	-0.980734	-0.5711	-0.0853164	-0.158718	-0.489271	0.110391	-0.198976	0.0574308	-0.470934	0.385484	-0.0163748	-0.139476	0.039891	-0.361268	0.166509	-0.752171	0.459793	0.6922	-0.482634	-0.257492	-0.4568	-0.0424791	0.14068	-0.153006	1.03364	-0.02626	0.0345724	-0.262007	0.359431	-0.489215	-0.350366	0.276057	-0.219435	0.131806	-0.903099	-0.052082	-0.103199	0.180638	0.222631	-0.262447	-0.139284	-0.473131	-0.11491
-4.20964	-0.918848	1.43584	-0.305035	-0.375434	0.55889	0.993217	-0.978933	-0.571568	-0.0858289	-0.158891	-0.489318	0.107375	-0.198205	0.0572528	-0.471431	0.386217	-0.018124	-0.142002	0.0435205	-0.362624	0.168054	-0.75244	0.459864	0.691287	-0.483598	-0.257116	-0.456125	-0.0417338	0.140972	-0.153024	1.03509	-0.0268332	0.0345999	-0.259864	0.356446	-0.48986	-0.350749	0.275973	-0.22062	0.130351	-0.9026	-0.0521874	-0.102478	0.181186	0.220885	-0.263601	-0.140407	-0.472666	-0.114669
-4.20865	-0.919405	1.43881	-0.303853	-0.375803	0.558152	0.995075	-0.977119	-0.572023	-0.0863382	-0.159064	-0.489339	0.104366	-0.197444	0.0570649	-0.471907	0.386936	-0.0198673	-0.144517	0.0471578	-0.363987	0.169579	-0.752687	0.459934	0.690357	-0.48457	-0.256725	-0.455444	-0.0410007	0.141259	-0.153033	1.03655	-0.0274062	0.0346112	-0.257733	0.353481	-0.490486	-0.351122	0.275892	-0.221807	0.12888	-0.902088	-0.0522916	-0.101761	0.181726	0.219124	-0.264749	-0.141534	-0.472182	-0.114437
-4.20767	-0.919946	1.44178	-0.302671	-0.376155	0.557404	0.996959	-0.975291	-0.572466	-0.0868444	-0.159235	-0.489335	0.101365	-0.196692	0.0568671	-0.472363	0.387643	-0.0216045	-0.147022	0.0508024	-0.365358	0.171084	-0.752912	0.460004	0.689408	-0.48555	-0.256317	-0.454759	-0.0402798	0.141542	-0.153035	1.03804	-0.027979	0.0346062	-0.255614	0.350536	-0.491093	-0.351483	0.275815	-0.222998	0.127394	-0.901562	-0.0523947	-0.101048	0.18226	0.217349	-0.265889	-0.142665	-0.471678	-0.114213
-4.20669	-0.920471	1.44476	-0.301488	-0.376488	0.556647	0.998868	-0.973449	-0.572895	-0.0873475	-0.159406	-0.489306	0.0983698	-0.195951	0.0566595	-0.472798	0.388337	-0.0233355	-0.149514	0.0544542	-0.366736	0.17257	-0.753115	0.460073	0.688441	-0.486538	-0.255893	-0.45407	-0.0395712	0.14182	-0.153029	1.03955	-0.0285514	0.034585	-0.253507	0.347612	-0.491681	-0.351833	0.27574	-0.224192	0.125891	-0.901023	-0.0524968	-0.100339	0.182786	0.21556	-0.267022	-0.1438	-0.471154	-0.113998
-4.2057	-0.92098	1.44773	-0.300306	-0.376805	0.55588	1.0008	-0.971593	-0.573312	-0.0878475	-0.159576	-0.489251	0.0953825	-0.195219	0.0564423	-0.473212	0.389017	-0.02506	-0.151995	0.0581127	-0.368122	0.174035	-0.753296	0.460141	0.687457	-0.487534	-0.255452	-0.453377	-0.038875	0.142092	-0.153014	1.04108	-0.0291234	0.0345476	-0.251413	0.344708	-0.492249	-0.352172	0.275669	-0.225389	0.124373	-0.900471	-0.0525979	-0.0996337	0.183305	0.213758	-0.268147	-0.144939	-0.47061	-0.113791
-4.20472	-0.921474	1.45071	-0.299124	-0.377103	0.555105	1.00276	-0.969724	-0.573717	-0.0883445	-0.159745	-0.489171	0.0924027	-0.194496	0.0562154	-0.473605	0.389685	-0.0267778	-0.154464	0.0617776	-0.369514	0.175479	-0.753454	0.46021	0.686456	-0.488537	-0.254995	-0.452679	-0.0381913	0.14236	-0.152991	1.04263	-0.0296948	0.0344939	-0.249332	0.341824	-0.492799	-0.3525	0.275601	-0.226589	0.12284	-0.899906	-0.052698	-0.0989319	0.183816	0.211942	-0.269265	-0.146081	-0.470047	-0.113593
-4.20374	-0.921951	1.45369	-0.297942	-0.377384	0.554321	1.00474	-0.967841	-0.574108	-0.0888386	-0.159913	-0.489065	0.0894306	-0.193784	0.0559789	-0.473977	0.390338	-0.0284886	-0.156921	0.0654485	-0.370914	0.176904	-0.753591	0.460278	0.685437	-0.489548	-0.254522	-0.451977	-0.0375202	0.142623	-0.15296	1.0442	-0.0302656	0.034424	-0.247264	0.338961	-0.49333	-0.352817	0.275536	-0.227792	0.121292	-0.899328	-0.0527973	-0.0982337	0.18432	0.210112	-0.270374	-0.147228	-0.469464	-0.113403
-4.20275	-0.922411	1.45666	-0.296761	-0.377646	0.553527	1.00675	-0.965944	-0.574486	-0.0893297	-0.160081	-0.488934	0.0864665	-0.193081	0.0557329	-0.474327	0.390979	-0.0301924	-0.159366	0.0691252	-0.37232	0.178307	-0.753705	0.460346	0.6844	-0.490566	-0.254032	-0.451272	-0.0368618	0.142882	-0.152921	1.04579	-0.0308356	0.0343378	-0.245209	0.336118	-0.49384	-0.353122	0.275474	-0.228997	0.119728	-0.898737	-0.0528959	-0.0975389	0.184817	0.20827	-0.271476	-0.148379	-0.468862	-0.113221
-4.20177	-0.922855	1.45963	-0.29558	-0.37789	0.552725	1.00878	-0.964034	-0.574852	-0.0898179	-0.160247	-0.488778	0.0835103	-0.192389	0.0554775	-0.474655	0.391606	-0.0318887	-0.161797	0.0728072	-0.373733	0.179689	-0.753797	0.460413	0.683346	-0.491592	-0.253525	-0.450563	-0.0362161	0.143135	-0.152873	1.04741	-0.0314046	0.0342354	-0.243166	0.333297	-0.494332	-0.353416	0.275415	-0.230206	0.11815	-0.898132	-0.0529937	-0.0968476	0.185306	0.206415	-0.272569	-0.149535	-0.46824	-0.113047
-4.20079	-0.923281	1.46261	-0.294401	-0.378116	0.551915	1.01084	-0.962111	-0.575205	-0.0903034	-0.160414	-0.488597	0.0805624	-0.191705	0.0552128	-0.474962	0.392219	-0.0335775	-0.164216	0.0764943	-0.375153	0.18105	-0.753867	0.460481	0.682276	-0.492624	-0.253002	-0.44985	-0.0355831	0.143383	-0.152818	1.04904	-0.0319727	0.0341168	-0.241138	0.330496	-0.494803	-0.353699	0.27536	-0.231417	0.116557	-0.897514	-0.053091	-0.0961596	0.185788	0.204547	-0.273654	-0.150696	-0.4676	-0.112882
-4.19981	-0.92369	1.46558	-0.293222	-0.378324	0.551095	1.01292	-0.960175	-0.575544	-0.090786	-0.160579	-0.48839	0.0776228	-0.191032	0.0549387	-0.475246	0.392818	-0.0352586	-0.166621	0.080186	-0.376579	0.18239	-0.753914	0.460549	0.681188	-0.493664	-0.252461	-0.449133	-0.0349631	0.143627	-0.152754	1.05069	-0.0325397	0.033982	-0.239122	0.327715	-0.495255	-0.35397	0.275307	-0.232631	0.114949	-0.896884	-0.0531876	-0.0954748	0.186263	0.202666	-0.27473	-0.151861	-0.46694	-0.112725
-4.19882	-0.924082	1.46854	-0.292044	-0.378513	0.550268	1.01502	-0.958225	-0.575871	-0.0912659	-0.160744	-0.488159	0.0746918	-0.190369	0.0546555	-0.475509	0.393403	-0.0369316	-0.169013	0.0838822	-0.378011	0.183708	-0.753939	0.460618	0.680083	-0.49471	-0.251905	-0.448414	-0.034356	0.143865	-0.152682	1.05237	-0.0331054	0.033831	-0.23712	0.324956	-0.495686	-0.354229	0.275257	-0.233847	0.113326	-0.89624	-0.0532838	-0.0947931	0.18673	0.200774	-0.275797	-0.153031	-0.466261	-0.112577
-4.19784	-0.924457	1.47151	-0.290868	-0.378683	0.549432	1.01715	-0.956262	-0.576185	-0.0917432	-0.160908	-0.487902	0.0717694	-0.189715	0.054363	-0.475749	0.393975	-0.0385965	-0.171392	0.0875823	-0.37945	0.185004	-0.753941	0.460687	0.678961	-0.495763	-0.251331	-0.447691	-0.0337619	0.144099	-0.152602	1.05406	-0.0336699	0.0336638	-0.235132	0.322217	-0.496098	-0.354477	0.27521	-0.235067	0.11169	-0.895583	-0.0533796	-0.0941145	0.18719	0.198869	-0.276855	-0.154206	-0.465563	-0.112437
-4.19686	-0.924813	1.47447	-0.289692	-0.378835	0.548587	1.0193	-0.954286	-0.576486	-0.0922178	-0.161071	-0.48762	0.0688559	-0.189072	0.0540616	-0.475966	0.394532	-0.0402529	-0.173756	0.0912861	-0.380894	0.186278	-0.753921	0.460756	0.677822	-0.496822	-0.25074	-0.446965	-0.0331809	0.144327	-0.152513	1.05577	-0.0342329	0.0334805	-0.233157	0.319499	-0.496489	-0.354713	0.275166	-0.236288	0.110038	-0.894914	-0.0534751	-0.0934389	0.187642	0.196953	-0.277903	-0.155386	-0.464847	-0.112305
-4.19587	-0.925152	1.47742	-0.288518	-0.378968	0.547735	1.02147	-0.952298	-0.576774	-0.0926898	-0.161234	-0.487314	0.0659513	-0.188438	0.0537511	-0.476161	0.395074	-0.0419007	-0.176106	0.0949933	-0.382345	0.187531	-0.753878	0.460826	0.676667	-0.497888	-0.250133	-0.446236	-0.0326131	0.14455	-0.152417	1.05751	-0.0347943	0.033281	-0.231196	0.316802	-0.496859	-0.354938	0.275125	-0.237512	0.108373	-0.894232	-0.0535703	-0.0927661	0.188087	0.195026	-0.278942	-0.156572	-0.464112	-0.112181
[truncated: 14,440 more rows]
[truncated: 131 more columns]
