# Supplementary material for: Dopamine activity encodes the changing valence of the same stimulus in conditioned taste aversion paradigms
Source: eLife. 2025 Mar 5;13:RP103260. doi: 10.7554/eLife.103260 (PMC11882140; doi:10.7554/eLife.103260)
Supplement: Figure 8—source data 3. [file elife-103260-fig8-data3.xlsx]

## Sheet: Figure8D
	unpaired
	c1			e1
Svg152	1.00867	1.13026	1.02295	1.12715	1.31735	0.81149	0.980096	1.10858	0.879693	1.10682	0.861024
Svg171	0.561897	0.355461	0.40961	0.64154	0.162718	0.478188	0.511102	0.541754	0.489847	0.67678	0.867106
Svg173	0.7013	1.182	0.679796	1.01115	0.929444	1.34692	1.01314	1.05384	0.884678	0.835559	0.767411
Svg149	-0.0314401	-0.0940035	-0.0508322	0.0755428	0.195777	0.162604	0.0706967	0.377777	0.464183	0.342477	0.432582
Svg159	0.310987	0.351278	0.627307	0.640344	0.493318	0.821117	0.774399	0.811006	0.744548	0.502016	0.552808
Svg146	0.400634	0.240014	0.367052	0.363517	0.507106	0.458541	0.204168	0.470773	0.730782	0.665191	0.541537
Svg150	0.577915	0.404657	0.878758	0.950395	0.904654	0.954764	1.08669	1.10328	0.781185	0.952649	0.938154
	paired
Svg138	-0.0808206	-0.255344	-0.4583	-0.251917	-0.255859	-0.0853989	-0.283197	-0.0152799	0.0423906	0.0751806	0.261234
Svg141	0.98023	0.482499	-0.35467	-0.467232	-0.0833412	-0.157688	0.168024	0.0632413	0.398403	-0.00548114	0.314045
Svg145	0.488955	0.125913	-0.283213	-0.297232	-0.428466	-0.216351	-0.125045	0.10196	0.300585	0.808264	0.639868
Svg151	0.938005	0.425113	-0.325455	-0.452236	-0.366208	-0.144482	-0.359079	-0.148692	0.253423	0.806277	1.02263
Svg157	0.0782369	-0.163224	-0.307639	-0.203708	-0.34136	-0.213663	-0.240349	-0.28907	0.133525	0.268048	0.453424
Svg148	0.791676	-0.391855	-0.354989	-0.349309	-0.34694	-0.342256	-0.326945	-0.33371	0.139283	0.368049	1.26721
Svg165	-0.367409	-0.359482	-0.45901	-0.504441	-0.561712	-0.518206	-0.376314	-0.406836	-0.148474	-0.194116	-0.0881099
Svg156	0.890321	0.0398582	-0.189863	-0.166818	-0.159297	-0.213584	-0.177123	-0.286884	-0.0598287	0.432371	0.72065
