# Supplementary material for: Dopamine activity encodes the changing valence of the same stimulus in conditioned taste aversion paradigms
Source: eLife. 2025 Mar 5;13:RP103260. doi: 10.7554/eLife.103260 (PMC11882140; doi:10.7554/eLife.103260)
Supplement: Figure 8—source data 4. [file elife-103260-fig8-data4.xlsx]

## Sheet: Figure 8E
C1				C2				C3				E1				E2				E3				E4				E5				E6				E7				E8
Subject	Treatment	Trial	Mean z-score	Subject	Treatment	Trial	Mean z-score	Subject	Treatment	Trial	Mean z-score	Subject	Treatment	Trial	Mean z-score	Subject	Treatment	Trial	Mean z-score	Subject	Treatment	Trial	Mean z-score	Subject	Treatment	Trial	Mean z-score	Subject	Treatment	Trial	Mean z-score	Subject	Treatment	Trial	Mean z-score	Subject	Treatment	Trial	Mean z-score	Subject	Treatment	Trial	Mean z-score
Svg138	Paired	1	-0.587262	Svg138	Paired	1	-0.783156	Svg138	Paired	1	-0.140658	Svg138	Paired	1	-0.196237	Svg138	Paired	1	-1.06074	Svg138	Paired	1	-0.389372	Svg138	Paired	1	0.121723	Svg138	Paired	1	0.993188	Svg138	Paired	1	0.206968	Svg138	Paired	1	0.146822	Svg138	Paired	1	-0.312962
Svg138	Paired	2	0.521924	Svg138	Paired	2	0.0817409	Svg138	Paired	2	-0.383106	Svg138	Paired	2	-0.2293	Svg138	Paired	2	-0.15268	Svg138	Paired	2	-0.405049	Svg138	Paired	2	-0.70333	Svg138	Paired	2	-0.83632	Svg138	Paired	2	0.153501	Svg138	Paired	2	0.330117	Svg138	Paired	2	0.39154
Svg138	Paired	3	0.249221	Svg138	Paired	3	-0.574354	Svg138	Paired	3	-0.28509	Svg138	Paired	3	-0.282779	Svg138	Paired	3	0.178484	Svg138	Paired	3	0.136428	Svg138	Paired	3	-0.0843216	Svg138	Paired	3	-1.12614	Svg138	Paired	3	0.405988	Svg138	Paired	3	0.0732924	Svg138	Paired	3	-0.171873
Svg138	Paired	4	0.599353	Svg138	Paired	4	-0.459808	Svg138	Paired	4	-0.598064	Svg138	Paired	4	-0.0504237	Svg138	Paired	4	0.954579	Svg138	Paired	4	0.275711	Svg138	Paired	4	-0.528776	Svg138	Paired	4	1.76499	Svg138	Paired	4	0.129524	Svg138	Paired	4	0.581116	Svg138	Paired	4	0.227067
Svg138	Paired	5	-0.225532	Svg138	Paired	5	0.423547	Svg138	Paired	5	-0.348242	Svg138	Paired	5	-0.352769	Svg138	Paired	5	0.100999	Svg138	Paired	5	2.11459	Svg138	Paired	5	0.445066	Svg138	Paired	5	-2.2968	Svg138	Paired	5	2.69257	Svg138	Paired	5	-0.925365	Svg138	Paired	5	0.404726
Svg138	Paired	6	0.511698	Svg138	Paired	6	-0.416272	Svg138	Paired	6	-0.56011	Svg138	Paired	6	0.211026	Svg138	Paired	6	-0.0104148	Svg138	Paired	6	-0.184875	Svg138	Paired	6	-0.35883	Svg138	Paired	6	-0.590661	Svg138	Paired	6	0.263662	Svg138	Paired	6	-0.107107	Svg138	Paired	6	-0.0270306
Svg138	Paired	7	-0.0929479	Svg138	Paired	7	0.124388	Svg138	Paired	7	-0.770534	Svg138	Paired	7	-0.268351	Svg138	Paired	7	-0.835598	Svg138	Paired	7	0.623964	Svg138	Paired	7	-0.476293	Svg138	Paired	7	0.758069	Svg138	Paired	7	0.583853	Svg138	Paired	7	0.205881	Svg138	Paired	7	0.0687674
Svg138	Paired	8	0.102208	Svg138	Paired	8	0.96996	Svg138	Paired	8	-0.48394	Svg138	Paired	8	-0.381988	Svg138	Paired	8	0.326268	Svg138	Paired	8	0.0132317	Svg138	Paired	8	0.365625	Svg138	Paired	8	0.391238	Svg138	Paired	8	-0.0764267	Svg138	Paired	8	0.598475	Svg138	Paired	8	1.76546
Svg138	Paired	9	1.02028	Svg138	Paired	9	-0.713001	Svg138	Paired	9	-0.712518	Svg138	Paired	9	-0.158369	Svg138	Paired	9	-0.334109	Svg138	Paired	9	0.596226	Svg138	Paired	9	-0.12519	Svg138	Paired	9	0.222933	Svg138	Paired	9	-0.721556	Svg138	Paired	9	0.556371	Svg138	Paired	9	0.0882877
Svg138	Paired	10	0.402034	Svg138	Paired	10	0.522598	Svg138	Paired	10	-0.757008	Svg138	Paired	10	-0.245018	Svg138	Paired	10	-0.66049	Svg138	Paired	10	-0.456511	Svg138	Paired	10	0.0639108	Svg138	Paired	10	-0.418778	Svg138	Paired	10	-0.81428	Svg138	Paired	10	-0.407015	Svg138	Paired	10	0.447181
Svg138	Paired	11	-0.332562	Svg138	Paired	11	-0.379544	Svg138	Paired	11	-0.514848	Svg138	Paired	11	-0.135836	Svg138	Paired	11	-1.22078	Svg138	Paired	11	-0.740366	Svg138	Paired	11	-0.0569367	Svg138	Paired	11	-0.167748	Svg138	Paired	11	-0.0910297	Svg138	Paired	11	0.541605	Svg138	Paired	11	0.477891
Svg138	Paired	12	-0.708127	Svg138	Paired	12	-0.640753	Svg138	Paired	12	-0.931149	Svg138	Paired	12	0.00254676	Svg138	Paired	12	-0.260755	Svg138	Paired	12	0.738134	Svg138	Paired	12	0.187261	Svg138	Paired	12	0.718162	Svg138	Paired	12	1.04186	Svg138	Paired	12	0.225352	Svg138	Paired	12	0.247718
Svg138	Paired	13	0.181725	Svg138	Paired	13	-0.191705	Svg138	Paired	13	-0.596023	Svg138	Paired	13	-0.234034	Svg138	Paired	13	-0.493674	Svg138	Paired	13	-0.623589	Svg138	Paired	13	-0.394435	Svg138	Paired	13	-0.0168859	Svg138	Paired	13	0.095201	Svg138	Paired	13	-0.243284	Svg138	Paired	13	-0.0550237
Svg138	Paired	14	0.0886049	Svg138	Paired	14	0.247054	Svg138	Paired	14	0.587336	Svg138	Paired	14	0.0918068	Svg138	Paired	14	0.138628	Svg138	Paired	14	-0.274904	Svg138	Paired	14	0.367038	Svg138	Paired	14	0.230465	Svg138	Paired	14	-0.398438	Svg138	Paired	14	-0.338112	Svg138	Paired	14	-0.225445
Svg138	Paired	15	-0.380596	Svg138	Paired	15	-0.528405	Svg138	Paired	15	-0.253271	Svg138	Paired	15	-0.778228	Svg138	Paired	15	-0.640816	Svg138	Paired	15	-0.0752851	Svg138	Paired	15	-0.182189	Svg138	Paired	15	-0.153206	Svg138	Paired	15	0.107202	Svg138	Paired	15	0.198732	Svg138	Paired	15	0.492408
Svg138	Paired	16	0.729349	Svg138	Paired	16	-0.650357	Svg138	Paired	16	-0.982804	Svg138	Paired	16	-0.719219	Svg138	Paired	16	-0.330071	Svg138	Paired	16	-0.796162	Svg138	Paired	16	-0.742599	Svg138	Paired	16	0.186297	Svg138	Paired	16	-0.273707	Svg138	Paired	16	-0.0244516	Svg138	Paired	16	1.09823
Svg138	Paired	17	-0.290902	Svg138	Paired	17	0.0532114	Svg138	Paired	17	-0.559734	Svg138	Paired	17	-0.447726	Svg138	Paired	17	-0.4535	Svg138	Paired	17	-0.631777	Svg138	Paired	17	-0.675459	Svg138	Paired	17	0.351112	Svg138	Paired	17	-0.518405	Svg138	Paired	17	0.803111	Svg138	Paired	17	-0.286729
Svg138	Paired	18	0.0113092	Svg138	Paired	18	-1.0558	Svg138	Paired	18	-0.21594	Svg138	Paired	18	-0.327873	Svg138	Paired	18	-0.219622	Svg138	Paired	18	-0.474473	Svg138	Paired	18	-0.517314	Svg138	Paired	18	-0.187353	Svg138	Paired	18	-0.724603	Svg138	Paired	18	0.541311	Svg138	Paired	18	0.723287
Svg138	Paired	19	0.079917	Svg138	Paired	19	0.0214733	Svg138	Paired	19	-0.433357	Svg138	Paired	19	0.23987	Svg138	Paired	19	0.37152	Svg138	Paired	19	0.13154	Svg138	Paired	19	-0.637242	Svg138	Paired	19	0.102896	Svg138	Paired	19	-0.247991	Svg138	Paired	19	0.424757	Svg138	Paired	19	0.395667
Svg138	Paired	20	-0.200489	Svg138	Paired	20	-0.701729	Svg138	Paired	20	-0.45017	Svg138	Paired	20	-0.0283993	Svg138	Paired	20	-0.133456	Svg138	Paired	20	-0.256936	Svg138	Paired	20	0.0547761	Svg138	Paired	20	-0.254854	Svg138	Paired	20	0.0998285	Svg138	Paired	20	-0.158555	Svg138	Paired	20	0.853081
Svg138	Paired	21	0.05683	Svg138	Paired	21	-0.957864	Svg138	Paired	21	-0.100826	Svg138	Paired	21	-0.103589	Svg138	Paired	21	-0.623872	Svg138	Paired	21	-0.780296	Svg138	Paired	21	-0.418914	Svg138	Paired	21	0.016881	Svg138	Paired	21	-0.428794	Svg138	Paired	21	0.847992	Svg138	Paired	21	0.247612
Svg138	Paired	22	-0.17725	Svg138	Paired	22	-0.251126	Svg138	Paired	22	-1.05871	Svg138	Paired	22	0.116373	Svg138	Paired	22	0.410887	Svg138	Paired	22	-0.256682	Svg138	Paired	22	-0.330854	Svg138	Paired	22	-0.271115	Svg138	Paired	22	1.00325	Svg138	Paired	22	-0.146761	Svg138	Paired	22	0.0723897
Svg138	Paired	23	-0.670525	Svg138	Paired	23	0.0383707	Svg138	Paired	23	0.233424	Svg138	Paired	23	-0.632684	Svg138	Paired	23	0.868454	Svg138	Paired	23	0.903953	Svg138	Paired	23	-0.274371	Svg138	Paired	23	0.761616	Svg138	Paired	23	0.119715	Svg138	Paired	23	-0.190284	Svg138	Paired	23	0.308332
Svg138	Paired	24	0.279275	Svg138	Paired	24	0.0401557	Svg138	Paired	24	-0.907119	Svg138	Paired	24	1.35891	Svg138	Paired	24	-0.169969	Svg138	Paired	24	-0.179599	Svg138	Paired	24	0.408428	Svg138	Paired	24	0.402573	Svg138	Paired	24	-0.483028	Svg138	Paired	24	-0.457423	Svg138	Paired	24	0.247098
Svg138	Paired	25	-0.463378	Svg138	Paired	25	-0.358935	Svg138	Paired	25	-0.41983	Svg138	Paired	25	-1.59951	Svg138	Paired	25	0.190224	Svg138	Paired	25	-0.364686	Svg138	Paired	25	0.597262	Svg138	Paired	25	-0.69367	Svg138	Paired	25	0.618838	Svg138	Paired	25	0.547404	Svg138	Paired	25	-0.0289711
Svg138	Paired	26	-0.469802	Svg138	Paired	26	0.0920127	Svg138	Paired	26	-0.231528	Svg138	Paired	26	1.24968	Svg138	Paired	26	-0.224849	Svg138	Paired	26	0.728636	Svg138	Paired	26	-0.145497	Svg138	Paired	26	0.68514	Svg138	Paired	26	-0.68969	Svg138	Paired	26	-0.21474	Svg138	Paired	26	0.823927
Svg138	Paired	27	-0.839792	Svg138	Paired	27	-0.619244	Svg138	Paired	27	0.376397	Svg138	Paired	27	-3.00726	Svg138	Paired	27	-0.756862	Svg138	Paired	27	-0.26666	Svg138	Paired	27	1.56922	Svg138	Paired	27	-0.0140088	Svg138	Paired	27	0.593769	Svg138	Paired	27	-0.156931	Svg138	Paired	27	0.744368
Svg138	Paired	28	-0.180472	Svg138	Paired	28	0.643056	Svg138	Paired	28	0.0904173	Svg138	Paired	28	0.244354	Svg138	Paired	28	-0.38644	Svg138	Paired	28	0.176406	Svg138	Paired	28	-1.0629	Svg138	Paired	28	-0.603774	Svg138	Paired	28	0.285776	Svg138	Paired	28	0.757729	Svg138	Paired	28	0.302671
Svg138	Paired	29	-0.247754	Svg138	Paired	29	0.0753131	Svg138	Paired	29	-0.319726	Svg138	Paired	29	0.10388	Svg138	Paired	29	0.256586	Svg138	Paired	29	-0.732451	Svg138	Paired	29	-0.68852	Svg138	Paired	29	0.190134	Svg138	Paired	29	0.320405	Svg138	Paired	29	0.343861	Svg138	Paired	29	-0.467613
Svg138	Paired	30	-1.39096	Svg138	Paired	30	-1.71116	Svg138	Paired	30	-2.02226	Svg138	Paired	30	-0.99636	Svg138	Paired	30	-2.5037	Svg138	Paired	30	-1.11111	Svg138	Paired	30	-4.27224	Svg138	Paired	30	-0.602777	Svg138	Paired	30	-1.98224	Svg138	Paired	30	-2.09848	Svg138	Paired	30	-1.01505
Svg141	Paired	1	1.11259	Svg141	Paired	1	1.45814	Svg141	Paired	1	0.322643	Svg141	Paired	1	0.336271	Svg141	Paired	1	-0.285979	Svg141	Paired	1	-0.328172	Svg141	Paired	1	0.271352	Svg141	Paired	1	0.901172	Svg141	Paired	1	0.0850744	Svg141	Paired	1	-1.78467	Svg141	Paired	1	0.197609
Svg141	Paired	2	2.25727	Svg141	Paired	2	2.113	Svg141	Paired	2	-0.133128	Svg141	Paired	2	-0.678999	Svg141	Paired	2	0.421177	Svg141	Paired	2	-0.897285	Svg141	Paired	2	-0.0989604	Svg141	Paired	2	0.676842	Svg141	Paired	2	-0.0619832	Svg141	Paired	2	0.791537	Svg141	Paired	2	0.233211
Svg141	Paired	3	1.97498	Svg141	Paired	3	1.00547	Svg141	Paired	3	0.110519	Svg141	Paired	3	0.155149	Svg141	Paired	3	0.627866	Svg141	Paired	3	-0.770449	Svg141	Paired	3	0.577476	Svg141	Paired	3	-0.928294	Svg141	Paired	3	1.87337	Svg141	Paired	3	-2.12049	Svg141	Paired	3	-0.120138
Svg141	Paired	4	1.26367	Svg141	Paired	4	0.729278	Svg141	Paired	4	-0.597217	Svg141	Paired	4	-0.544398	Svg141	Paired	4	-0.199538	Svg141	Paired	4	1.67201	Svg141	Paired	4	0.537357	Svg141	Paired	4	0.757344	Svg141	Paired	4	0.0510921	Svg141	Paired	4	0.794766	Svg141	Paired	4	0.553146
Svg141	Paired	5	1.5707	Svg141	Paired	5	-0.265572	Svg141	Paired	5	-0.634667	Svg141	Paired	5	-0.500468	Svg141	Paired	5	0.0341627	Svg141	Paired	5	-0.240758	Svg141	Paired	5	0.025078	Svg141	Paired	5	0.317562	Svg141	Paired	5	1.2419	Svg141	Paired	5	0.375294	Svg141	Paired	5	0.0295984
Svg141	Paired	6	0.747006	Svg141	Paired	6	0.608531	Svg141	Paired	6	-1.13202	Svg141	Paired	6	-0.673462	Svg141	Paired	6	-0.379506	Svg141	Paired	6	-0.596749	Svg141	Paired	6	0.265331	Svg141	Paired	6	0.826316	Svg141	Paired	6	0.635069	Svg141	Paired	6	-0.20178	Svg141	Paired	6	0.285593
Svg141	Paired	7	0.211424	Svg141	Paired	7	0.651641	Svg141	Paired	7	-0.580008	Svg141	Paired	7	-0.35293	Svg141	Paired	7	-0.316771	Svg141	Paired	7	-0.607683	Svg141	Paired	7	-0.255036	Svg141	Paired	7	-0.263851	Svg141	Paired	7	1.16675	Svg141	Paired	7	-0.477604	Svg141	Paired	7	0.00892164
Svg141	Paired	8	1.11198	Svg141	Paired	8	0.364921	Svg141	Paired	8	0.821192	Svg141	Paired	8	-0.270047	Svg141	Paired	8	0.424513	Svg141	Paired	8	0.068651	Svg141	Paired	8	-0.40092	Svg141	Paired	8	0.0485295	Svg141	Paired	8	0.0102643	Svg141	Paired	8	0.19858	Svg141	Paired	8	0.292924
Svg141	Paired	9	1.36896	Svg141	Paired	9	-0.231686	Svg141	Paired	9	-0.215073	Svg141	Paired	9	-1.16103	Svg141	Paired	9	0.205243	Svg141	Paired	9	-0.715934	Svg141	Paired	9	1.44284	Svg141	Paired	9	0.0299778	Svg141	Paired	9	-0.0700989	Svg141	Paired	9	0.352031	Svg141	Paired	9	0.0200479
Svg141	Paired	10	1.70813	Svg141	Paired	10	-0.473468	Svg141	Paired	10	-0.655306	Svg141	Paired	10	-0.293501	Svg141	Paired	10	0.149797	Svg141	Paired	10	0.783246	Svg141	Paired	10	0.176097	Svg141	Paired	10	0.191383	Svg141	Paired	10	0.254763	Svg141	Paired	10	-0.362915	Svg141	Paired	10	0.0455021
Svg141	Paired	11	0.66255	Svg141	Paired	11	0.412502	Svg141	Paired	11	-0.36694	Svg141	Paired	11	-0.736425	Svg141	Paired	11	-0.570477	Svg141	Paired	11	-0.502509	Svg141	Paired	11	0.354404	Svg141	Paired	11	0.169208	Svg141	Paired	11	-0.272719	Svg141	Paired	11	0.0325007	Svg141	Paired	11	0.187939
Svg141	Paired	12	0.964637	Svg141	Paired	12	0.327988	Svg141	Paired	12	-0.396019	Svg141	Paired	12	-0.271024	Svg141	Paired	12	0.173909	Svg141	Paired	12	-0.629367	Svg141	Paired	12	0.933288	Svg141	Paired	12	-0.469542	Svg141	Paired	12	0.759397	Svg141	Paired	12	0.231743	Svg141	Paired	12	-0.0886431
Svg141	Paired	13	1.0743	Svg141	Paired	13	1.12057	Svg141	Paired	13	-0.456582	Svg141	Paired	13	-0.631059	Svg141	Paired	13	0.649646	Svg141	Paired	13	-0.0267028	Svg141	Paired	13	-0.228337	Svg141	Paired	13	0.580017	Svg141	Paired	13	0.398821	Svg141	Paired	13	0.843405	Svg141	Paired	13	0.208756
Svg141	Paired	14	1.06083	Svg141	Paired	14	1.33826	Svg141	Paired	14	-0.477828	Svg141	Paired	14	-0.623497	Svg141	Paired	14	-0.169642	Svg141	Paired	14	-0.263476	Svg141	Paired	14	-0.0745595	Svg141	Paired	14	0.996042	Svg141	Paired	14	0.648669	Svg141	Paired	14	0.372523	Svg141	Paired	14	0.224044
Svg141	Paired	15	0.909374	Svg141	Paired	15	1.04757	Svg141	Paired	15	0.0626338	Svg141	Paired	15	-0.232688	Svg141	Paired	15	-0.0710427	Svg141	Paired	15	-0.155264	Svg141	Paired	15	0.162147	Svg141	Paired	15	-1.50434	Svg141	Paired	15	-0.446226	Svg141	Paired	15	-0.274085	Svg141	Paired	15	-0.0561834
Svg141	Paired	16	0.325369	Svg141	Paired	16	0.60436	Svg141	Paired	16	-0.31886	Svg141	Paired	16	-0.638644	Svg141	Paired	16	-0.152682	Svg141	Paired	16	-0.113115	Svg141	Paired	16	-0.549855	Svg141	Paired	16	0.105207	Svg141	Paired	16	-0.0764727	Svg141	Paired	16	0.213118	Svg141	Paired	16	0.13751
Svg141	Paired	17	0.441701	Svg141	Paired	17	0.511802	Svg141	Paired	17	-0.170225	Svg141	Paired	17	-0.267522	Svg141	Paired	17	-0.135917	Svg141	Paired	17	-0.486904	Svg141	Paired	17	0.432073	Svg141	Paired	17	0.760253	Svg141	Paired	17	0.395451	Svg141	Paired	17	0.0135479	Svg141	Paired	17	-0.312688
Svg141	Paired	18	0.654298	Svg141	Paired	18	-0.167094	Svg141	Paired	18	-0.688463	Svg141	Paired	18	0.285223	Svg141	Paired	18	0.216072	Svg141	Paired	18	-0.269417	Svg141	Paired	18	-0.624977	Svg141	Paired	18	-0.766165	Svg141	Paired	18	0.64222	Svg141	Paired	18	0.0317862	Svg141	Paired	18	-0.171973
Svg141	Paired	19	1.23385	Svg141	Paired	19	0.534441	Svg141	Paired	19	-0.451689	Svg141	Paired	19	-0.66608	Svg141	Paired	19	-0.292717	Svg141	Paired	19	-0.377005	Svg141	Paired	19	-0.15236	Svg141	Paired	19	0.375655	Svg141	Paired	19	1.01613	Svg141	Paired	19	0.0589689	Svg141	Paired	19	2.01359
Svg141	Paired	20	0.646049	Svg141	Paired	20	-0.0492884	Svg141	Paired	20	-0.0271528	Svg141	Paired	20	-0.694826	Svg141	Paired	20	-0.0921295	Svg141	Paired	20	0.877462	Svg141	Paired	20	1.19653	Svg141	Paired	20	1.7289	Svg141	Paired	20	0.0572042	Svg141	Paired	20	0.0214816	Svg141	Paired	20	-2.29583
Svg141	Paired	21	2.39817	Svg141	Paired	21	-0.386599	Svg141	Paired	21	-0.121646	Svg141	Paired	21	-0.785963	Svg141	Paired	21	-0.10183	Svg141	Paired	21	0.183528	Svg141	Paired	21	0.291892	Svg141	Paired	21	-0.830601	Svg141	Paired	21	0.417413	Svg141	Paired	21	0.294271	Svg141	Paired	21	3.81556
Svg141	Paired	22	2.29383	Svg141	Paired	22	0.664946	Svg141	Paired	22	0.101292	Svg141	Paired	22	-0.624836	Svg141	Paired	22	0.318646	Svg141	Paired	22	0.75668	Svg141	Paired	22	0.226573	Svg141	Paired	22	-2.11025	Svg141	Paired	22	0.49198	Svg141	Paired	22	-0.0809231	Svg141	Paired	22	3.09246
Svg141	Paired	23	-0.0931777	Svg141	Paired	23	1.21137	Svg141	Paired	23	-0.320537	Svg141	Paired	23	-0.313064	Svg141	Paired	23	-0.0418718	Svg141	Paired	23	-0.146673	Svg141	Paired	23	-0.292225	Svg141	Paired	23	1.06312	Svg141	Paired	23	0.181275	Svg141	Paired	23	-0.694028	Svg141	Paired	23	0.34078
Svg141	Paired	24	0.462702	Svg141	Paired	24	1.48369	Svg141	Paired	24	-0.925137	Svg141	Paired	24	-0.757699	Svg141	Paired	24	0.0849811	Svg141	Paired	24	-0.109925	Svg141	Paired	24	0.199771	Svg141	Paired	24	0.353575	Svg141	Paired	24	-0.0501818	Svg141	Paired	24	-0.166852	Svg141	Paired	24	-0.0709937
Svg141	Paired	25	0.633123	Svg141	Paired	25	0.617029	Svg141	Paired	25	-0.515595	Svg141	Paired	25	-0.937495	Svg141	Paired	25	-0.155004	Svg141	Paired	25	0.0186598	Svg141	Paired	25	-0.228783	Svg141	Paired	25	-0.934888	Svg141	Paired	25	0.00993837	Svg141	Paired	25	0.403201	Svg141	Paired	25	1.08393
Svg141	Paired	26	-0.0107696	Svg141	Paired	26	-0.438213	Svg141	Paired	26	-0.511124	Svg141	Paired	26	-0.8255	Svg141	Paired	26	0.179198	Svg141	Paired	26	-0.354021	Svg141	Paired	26	0.346656	Svg141	Paired	26	0.271762	Svg141	Paired	26	1.08593	Svg141	Paired	26	-0.0644293	Svg141	Paired	26	-0.60824
Svg141	Paired	27	1.64976	Svg141	Paired	27	0.0279763	Svg141	Paired	27	-0.213466	Svg141	Paired	27	-0.959391	Svg141	Paired	27	-1.00081	Svg141	Paired	27	0.00223416	Svg141	Paired	27	0.840661	Svg141	Paired	27	0.136897	Svg141	Paired	27	0.276006	Svg141	Paired	27	1.48836	Svg141	Paired	27	-0.163282
Svg141	Paired	28	0.190775	Svg141	Paired	28	0.370837	Svg141	Paired	28	-0.616013	Svg141	Paired	28	-0.772634	Svg141	Paired	28	-1.28511	Svg141	Paired	28	0.0597613	Svg141	Paired	28	-0.159933	Svg141	Paired	28	-0.799585	Svg141	Paired	28	0.551452	Svg141	Paired	28	-0.580302	Svg141	Paired	28	0.752455
Svg141	Paired	29	0.0710439	Svg141	Paired	29	-0.710153	Svg141	Paired	29	-0.960606	Svg141	Paired	29	0.469728	Svg141	Paired	29	0.135763	Svg141	Paired	29	-0.499823	Svg141	Paired	29	0.732228	Svg141	Paired	29	0.0809076	Svg141	Paired	29	-0.0315345	Svg141	Paired	29	0.176858	Svg141	Paired	29	-0.053878
Svg141	Paired	30	0.511774	Svg141	Paired	30	-0.00728693	Svg141	Paired	30	-0.573081	Svg141	Paired	30	-0.0501467	Svg141	Paired	30	-0.870181	Svg141	Paired	30	-1.06165	Svg141	Paired	30	-0.905086	Svg141	Paired	30	0.134081	Svg141	Paired	30	0.711144	Svg141	Paired	30	-0.0503339	Svg141	Paired	30	-0.160386
Svg145	Paired	1	0.0450769	Svg145	Paired	1	1.71181	Svg145	Paired	1	-0.372104	Svg145	Paired	1	-1.36076	Svg145	Paired	1	-0.17432	Svg145	Paired	1	-0.831443	Svg145	Paired	1	-0.885686	Svg145	Paired	1	-0.226164	Svg145	Paired	1	0.282606	Svg145	Paired	1	1.2255	Svg145	Paired	1	1.13689
Svg145	Paired	2	1.37535	Svg145	Paired	2	0.985745	Svg145	Paired	2	-0.382662	Svg145	Paired	2	-1.17618	Svg145	Paired	2	-0.51875	Svg145	Paired	2	-0.519824	Svg145	Paired	2	0.506492	Svg145	Paired	2	0.721413	Svg145	Paired	2	1.83164	Svg145	Paired	2	0.762959	Svg145	Paired	2	1.08335
Svg145	Paired	3	0.364986	Svg145	Paired	3	0.461698	Svg145	Paired	3	0.574516	Svg145	Paired	3	-0.62218	Svg145	Paired	3	-0.473542	Svg145	Paired	3	-0.298486	Svg145	Paired	3	-0.43796	Svg145	Paired	3	0.643976	Svg145	Paired	3	1.1095	Svg145	Paired	3	1.07868	Svg145	Paired	3	1.08989
Svg145	Paired	4	0.183716	Svg145	Paired	4	0.725122	Svg145	Paired	4	-1.04307	Svg145	Paired	4	-0.208163	Svg145	Paired	4	-0.198329	Svg145	Paired	4	-0.644478	Svg145	Paired	4	0.59714	Svg145	Paired	4	0.452264	Svg145	Paired	4	0.570245	Svg145	Paired	4	1.06787	Svg145	Paired	4	0.20294
Svg145	Paired	5	0.928757	Svg145	Paired	5	0.00315044	Svg145	Paired	5	-0.135096	Svg145	Paired	5	-1.06583	Svg145	Paired	5	-0.295363	Svg145	Paired	5	-0.219272	Svg145	Paired	5	0.18712	Svg145	Paired	5	-0.18213	Svg145	Paired	5	0.149634	Svg145	Paired	5	1.23928	Svg145	Paired	5	0.704588
Svg145	Paired	6	1.16405	Svg145	Paired	6	-0.203503	Svg145	Paired	6	0.51316	Svg145	Paired	6	-0.15278	Svg145	Paired	6	-0.192669	Svg145	Paired	6	-0.52977	Svg145	Paired	6	1.49224	Svg145	Paired	6	0.181323	Svg145	Paired	6	0.52644	Svg145	Paired	6	1.87438	Svg145	Paired	6	0.786283
Svg145	Paired	7	0.698385	Svg145	Paired	7	-0.333061	Svg145	Paired	7	-0.508961	Svg145	Paired	7	-0.839331	Svg145	Paired	7	-0.393386	Svg145	Paired	7	0.726711	Svg145	Paired	7	-0.182641	Svg145	Paired	7	-0.0964042	Svg145	Paired	7	0.188018	Svg145	Paired	7	0.721921	Svg145	Paired	7	0.034823
Svg145	Paired	8	0.827364	Svg145	Paired	8	0.0670533	Svg145	Paired	8	0.308405	Svg145	Paired	8	-0.15252	Svg145	Paired	8	-0.573283	Svg145	Paired	8	-0.0243204	Svg145	Paired	8	-0.083224	Svg145	Paired	8	-0.0707423	Svg145	Paired	8	0.324791	Svg145	Paired	8	0.801738	Svg145	Paired	8	-0.0928962
Svg145	Paired	9	1.11716	Svg145	Paired	9	-0.737809	Svg145	Paired	9	-0.442444	Svg145	Paired	9	0.0167036	Svg145	Paired	9	-0.617806	Svg145	Paired	9	-0.742494	Svg145	Paired	9	0.0435172	Svg145	Paired	9	-0.542489	Svg145	Paired	9	-0.0404784	Svg145	Paired	9	0.889927	Svg145	Paired	9	-0.414689
Svg145	Paired	10	1.12148	Svg145	Paired	10	0.941115	Svg145	Paired	10	-0.667936	Svg145	Paired	10	-0.705239	Svg145	Paired	10	-0.564583	Svg145	Paired	10	0.424314	Svg145	Paired	10	-0.655209	Svg145	Paired	10	1.70869	Svg145	Paired	10	0.169281	Svg145	Paired	10	1.15506	Svg145	Paired	10	1.2907
Svg145	Paired	11	0.694974	Svg145	Paired	11	-0.338458	Svg145	Paired	11	0.194046	Svg145	Paired	11	-0.391915	Svg145	Paired	11	0.225126	Svg145	Paired	11	-0.176945	Svg145	Paired	11	-0.297252	Svg145	Paired	11	-0.717599	Svg145	Paired	11	0.198186	Svg145	Paired	11	0.42502	Svg145	Paired	11	0.882354
Svg145	Paired	12	0.383326	Svg145	Paired	12	-0.240765	Svg145	Paired	12	-0.438924	Svg145	Paired	12	-0.716574	Svg145	Paired	12	-0.33934	Svg145	Paired	12	1.60492	Svg145	Paired	12	-0.361913	Svg145	Paired	12	-0.36395	Svg145	Paired	12	-0.158676	Svg145	Paired	12	0.38947	Svg145	Paired	12	0.268169
Svg145	Paired	13	0.839714	Svg145	Paired	13	0.438207	Svg145	Paired	13	-0.356137	Svg145	Paired	13	-0.213603	Svg145	Paired	13	-0.562225	Svg145	Paired	13	0.146124	Svg145	Paired	13	0.1813	Svg145	Paired	13	0.234209	Svg145	Paired	13	0.205169	Svg145	Paired	13	1.0855	Svg145	Paired	13	-0.312197
Svg145	Paired	14	0.522229	Svg145	Paired	14	-0.580518	Svg145	Paired	14	-0.332765	Svg145	Paired	14	0.769198	Svg145	Paired	14	-0.796094	Svg145	Paired	14	-0.243156	Svg145	Paired	14	-0.233968	Svg145	Paired	14	-0.202887	Svg145	Paired	14	0.732352	Svg145	Paired	14	0.788854	Svg145	Paired	14	0.68921
Svg145	Paired	15	0.868586	Svg145	Paired	15	0.502914	Svg145	Paired	15	-0.133967	Svg145	Paired	15	-0.834178	Svg145	Paired	15	-0.657196	Svg145	Paired	15	0.615145	Svg145	Paired	15	0.0617473	Svg145	Paired	15	0.0844339	Svg145	Paired	15	0.264322	Svg145	Paired	15	0.741051	Svg145	Paired	15	0.736682
Svg145	Paired	16	0.296718	Svg145	Paired	16	-0.826393	Svg145	Paired	16	-0.743873	Svg145	Paired	16	0.26672	Svg145	Paired	16	-0.520981	Svg145	Paired	16	-0.651845	Svg145	Paired	16	-0.513546	Svg145	Paired	16	-0.221276	Svg145	Paired	16	0.0691001	Svg145	Paired	16	0.0993468	Svg145	Paired	16	0.144124
Svg145	Paired	17	1.02233	Svg145	Paired	17	-0.174269	Svg145	Paired	17	-0.58636	Svg145	Paired	17	-0.254402	Svg145	Paired	17	0.0208542	Svg145	Paired	17	0.327559	Svg145	Paired	17	-0.0578338	Svg145	Paired	17	-0.615123	Svg145	Paired	17	0.233259	Svg145	Paired	17	0.823713	Svg145	Paired	17	0.908092
Svg145	Paired	18	0.624374	Svg145	Paired	18	0.143337	Svg145	Paired	18	0.0313714	Svg145	Paired	18	-0.386745	Svg145	Paired	18	-0.75052	Svg145	Paired	18	0.280561	Svg145	Paired	18	0.0485825	Svg145	Paired	18	0.259266	Svg145	Paired	18	0.29452	Svg145	Paired	18	1.43473	Svg145	Paired	18	0.858537
Svg145	Paired	19	0.287913	Svg145	Paired	19	0.156633	Svg145	Paired	19	-0.696853	Svg145	Paired	19	-0.451007	Svg145	Paired	19	0.199432	Svg145	Paired	19	-0.843308	Svg145	Paired	19	-0.437362	Svg145	Paired	19	-0.471217	Svg145	Paired	19	-0.134159	Svg145	Paired	19	0.158327	Svg145	Paired	19	0.411731
Svg145	Paired	20	0.702912	Svg145	Paired	20	0.0615759	Svg145	Paired	20	0.365326	Svg145	Paired	20	-0.126684	Svg145	Paired	20	-0.60089	Svg145	Paired	20	-0.335396	Svg145	Paired	20	-0.456369	Svg145	Paired	20	2.71475	Svg145	Paired	20	0.881764	Svg145	Paired	20	1.20371	Svg145	Paired	20	1.59467
Svg145	Paired	21	-0.111592	Svg145	Paired	21	-0.221535	Svg145	Paired	21	-0.0756441	Svg145	Paired	21	-0.526758	Svg145	Paired	21	-0.193133	Svg145	Paired	21	-0.427608	Svg145	Paired	21	-0.0395072	Svg145	Paired	21	-0.553198	Svg145	Paired	21	1.53298	Svg145	Paired	21	0.616282	Svg145	Paired	21	1.07539
Svg145	Paired	22	0.11694	Svg145	Paired	22	0.97188	Svg145	Paired	22	-0.39735	Svg145	Paired	22	-0.44684	Svg145	Paired	22	-0.720173	Svg145	Paired	22	-0.302645	Svg145	Paired	22	-0.138757	Svg145	Paired	22	-0.151475	Svg145	Paired	22	-0.217343	Svg145	Paired	22	0.576623	Svg145	Paired	22	0.483956
Svg145	Paired	23	0.0112663	Svg145	Paired	23	-0.0383629	Svg145	Paired	23	-0.0284238	Svg145	Paired	23	0.387245	Svg145	Paired	23	-0.22553	Svg145	Paired	23	-0.716462	Svg145	Paired	23	0.798598	Svg145	Paired	23	0.133864	Svg145	Paired	23	0.0298282	Svg145	Paired	23	0.665054	Svg145	Paired	23	1.71923
Svg145	Paired	24	0.301499	Svg145	Paired	24	0.0265257	Svg145	Paired	24	-0.577186	Svg145	Paired	24	-0.471943	Svg145	Paired	24	-0.539481	Svg145	Paired	24	-0.447434	Svg145	Paired	24	-0.460274	Svg145	Paired	24	0.355943	Svg145	Paired	24	-0.00955742	Svg145	Paired	24	0.776768	Svg145	Paired	24	1.08167
Svg145	Paired	25	0.761061	Svg145	Paired	25	-0.0156735	Svg145	Paired	25	-0.705854	Svg145	Paired	25	2.08795	Svg145	Paired	25	-0.491784	Svg145	Paired	25	-0.0134445	Svg145	Paired	25	-0.0490907	Svg145	Paired	25	0.430654	Svg145	Paired	25	0.500675	Svg145	Paired	25	1.69729	Svg145	Paired	25	0.662616
Svg145	Paired	26	0.536662	Svg145	Paired	26	0.106595	Svg145	Paired	26	0.130874	Svg145	Paired	26	-0.550659	Svg145	Paired	26	-0.621926	Svg145	Paired	26	-0.191763	Svg145	Paired	26	-0.24849	Svg145	Paired	26	0.165735	Svg145	Paired	26	0.106849	Svg145	Paired	26	1.25108	Svg145	Paired	26	1.40452
Svg145	Paired	27	-0.194915	Svg145	Paired	27	0.569605	Svg145	Paired	27	-0.393574	Svg145	Paired	27	-0.109899	Svg145	Paired	27	-0.763435	Svg145	Paired	27	-0.672306	Svg145	Paired	27	-0.305623	Svg145	Paired	27	0.0167429	Svg145	Paired	27	-0.334652	Svg145	Paired	27	0.859572	Svg145	Paired	27	0.530111
Svg145	Paired	28	0.0908148	Svg145	Paired	28	1.0642	Svg145	Paired	28	-0.321311	Svg145	Paired	28	-0.45132	Svg145	Paired	28	-0.0938733	Svg145	Paired	28	-0.465401	Svg145	Paired	28	-0.371965	Svg145	Paired	28	-0.403048	Svg145	Paired	28	0.217276	Svg145	Paired	28	0.448716	Svg145	Paired	28	0.222191
Svg145	Paired	29	-0.252797	Svg145	Paired	29	0.0182618	Svg145	Paired	29	0.149914	Svg145	Paired	29	0.71966	Svg145	Paired	29	-0.518437	Svg145	Paired	29	-0.456021	Svg145	Paired	29	-0.501971	Svg145	Paired	29	-0.283041	Svg145	Paired	29	0.780471	Svg145	Paired	29	1.00331	Svg145	Paired	29	0.0701355
Svg145	Paired	30	-0.659692	Svg145	Paired	30	-1.46768	Svg145	Paired	30	-1.42352	Svg145	Paired	30	-0.94892	Svg145	Paired	30	-0.902361	Svg145	Paired	30	-0.862048	Svg145	Paired	30	-0.949432	Svg145	Paired	30	0.0562856	Svg145	Paired	30	-1.2865	Svg145	Paired	30	-1.61382	Svg145	Paired	30	-0.057024
Svg148	Paired	1	3.40259	Svg148	Paired	1	0.239119	Svg148	Paired	1	0.336721	Svg148	Paired	1	0.0413899	Svg148	Paired	1	-0.54678	Svg148	Paired	1	-1.44813	Svg148	Paired	1	-1.35653	Svg148	Paired	1	-0.663426	Svg148	Paired	1	-0.455502	Svg148	Paired	1	0.830061	Svg148	Paired	1	1.95727
Svg148	Paired	2	1.7552	Svg148	Paired	2	0.848004	Svg148	Paired	2	0.10486	Svg148	Paired	2	-0.498563	Svg148	Paired	2	0.7576	Svg148	Paired	2	-0.57156	Svg148	Paired	2	0.10391	Svg148	Paired	2	-0.829304	Svg148	Paired	2	1.15562	Svg148	Paired	2	1.00524	Svg148	Paired	2	2.73216
Svg148	Paired	3	1.09316	Svg148	Paired	3	0.5037	Svg148	Paired	3	0.0468245	Svg148	Paired	3	-0.304059	Svg148	Paired	3	-0.496354	Svg148	Paired	3	-0.089408	Svg148	Paired	3	-0.665801	Svg148	Paired	3	-0.404714	Svg148	Paired	3	-0.544605	Svg148	Paired	3	1.78214	Svg148	Paired	3	1.95773
Svg148	Paired	4	1.20188	Svg148	Paired	4	-0.456615	Svg148	Paired	4	-0.174657	Svg148	Paired	4	-0.220432	Svg148	Paired	4	-0.229485	Svg148	Paired	4	-0.237814	Svg148	Paired	4	0.505191	Svg148	Paired	4	-0.360094	Svg148	Paired	4	0.0128212	Svg148	Paired	4	0.791638	Svg148	Paired	4	2.08629
Svg148	Paired	5	0.558425	Svg148	Paired	5	0.282791	Svg148	Paired	5	0.133714	Svg148	Paired	5	-0.0846517	Svg148	Paired	5	0.0125712	Svg148	Paired	5	-0.8802	Svg148	Paired	5	0.332351	Svg148	Paired	5	-0.552873	Svg148	Paired	5	-0.502919	Svg148	Paired	5	1.77239	Svg148	Paired	5	0.891249
Svg148	Paired	6	0.462608	Svg148	Paired	6	-0.394137	Svg148	Paired	6	-0.762317	Svg148	Paired	6	-0.234428	Svg148	Paired	6	-0.366169	Svg148	Paired	6	-0.544482	Svg148	Paired	6	-0.2748	Svg148	Paired	6	-0.228068	Svg148	Paired	6	-0.849772	Svg148	Paired	6	-0.140813	Svg148	Paired	6	1.62904
Svg148	Paired	7	1.84812	Svg148	Paired	7	-0.1533	Svg148	Paired	7	-0.723974	Svg148	Paired	7	-0.68649	Svg148	Paired	7	-0.171363	Svg148	Paired	7	0.301577	Svg148	Paired	7	-0.128737	Svg148	Paired	7	-0.44169	Svg148	Paired	7	-0.876662	Svg148	Paired	7	-0.169925	Svg148	Paired	7	1.97158
Svg148	Paired	8	0.45722	Svg148	Paired	8	-0.432435	Svg148	Paired	8	-0.783358	Svg148	Paired	8	0.269627	Svg148	Paired	8	-0.20662	Svg148	Paired	8	0.42277	Svg148	Paired	8	-0.551669	Svg148	Paired	8	-0.119139	Svg148	Paired	8	-0.827186	Svg148	Paired	8	1.94773	Svg148	Paired	8	1.8534
Svg148	Paired	9	1.28785	Svg148	Paired	9	0.236591	Svg148	Paired	9	-0.0548896	Svg148	Paired	9	-0.240482	Svg148	Paired	9	0.1972	Svg148	Paired	9	0.243074	Svg148	Paired	9	-0.704281	Svg148	Paired	9	0.0931829	Svg148	Paired	9	-0.304243	Svg148	Paired	9	0.100047	Svg148	Paired	9	1.32883
Svg148	Paired	10	0.699567	Svg148	Paired	10	-0.800199	Svg148	Paired	10	-0.887154	Svg148	Paired	10	-0.784373	Svg148	Paired	10	-0.901734	Svg148	Paired	10	-0.418958	Svg148	Paired	10	0.0226357	Svg148	Paired	10	-0.415845	Svg148	Paired	10	0.749332	Svg148	Paired	10	0.0669366	Svg148	Paired	10	1.76607
Svg148	Paired	11	0.7656	Svg148	Paired	11	-0.00890213	Svg148	Paired	11	-0.241005	Svg148	Paired	11	-0.747372	Svg148	Paired	11	-0.35194	Svg148	Paired	11	-0.0694398	Svg148	Paired	11	-0.104979	Svg148	Paired	11	-0.529249	Svg148	Paired	11	-0.669218	Svg148	Paired	11	0.556771	Svg148	Paired	11	0.766014
Svg148	Paired	12	-0.170701	Svg148	Paired	12	-0.780275	Svg148	Paired	12	-0.940337	Svg148	Paired	12	1.66134	Svg148	Paired	12	-0.329268	Svg148	Paired	12	-0.454558	Svg148	Paired	12	-0.6103	Svg148	Paired	12	-0.0952323	Svg148	Paired	12	0.564301	Svg148	Paired	12	0.435257	Svg148	Paired	12	1.64402
Svg148	Paired	13	0.276146	Svg148	Paired	13	-1.04814	Svg148	Paired	13	-0.177418	Svg148	Paired	13	-0.790693	Svg148	Paired	13	-0.59049	Svg148	Paired	13	-0.961289	Svg148	Paired	13	-0.738724	Svg148	Paired	13	-0.453835	Svg148	Paired	13	-0.173857	Svg148	Paired	13	0.494109	Svg148	Paired	13	0.350994
Svg148	Paired	14	0.852575	Svg148	Paired	14	-0.304353	Svg148	Paired	14	-0.405094	Svg148	Paired	14	-0.266498	Svg148	Paired	14	-0.479895	Svg148	Paired	14	-0.727781	Svg148	Paired	14	-0.356271	Svg148	Paired	14	-0.317945	Svg148	Paired	14	0.176098	Svg148	Paired	14	0.769404	Svg148	Paired	14	1.5572
Svg148	Paired	15	0.344288	Svg148	Paired	15	-1.1555	Svg148	Paired	15	0.0986992	Svg148	Paired	15	-0.362149	Svg148	Paired	15	-0.420713	Svg148	Paired	15	-0.716422	Svg148	Paired	15	0.943669	Svg148	Paired	15	-0.39777	Svg148	Paired	15	-0.207707	Svg148	Paired	15	-0.209614	Svg148	Paired	15	1.79216
Svg148	Paired	16	0.483589	Svg148	Paired	16	-0.854516	Svg148	Paired	16	-0.78145	Svg148	Paired	16	0.114677	Svg148	Paired	16	-0.457382	Svg148	Paired	16	-0.827791	Svg148	Paired	16	-1.00287	Svg148	Paired	16	-0.257643	Svg148	Paired	16	-0.15588	Svg148	Paired	16	0.423339	Svg148	Paired	16	1.40885
Svg148	Paired	17	1.04768	Svg148	Paired	17	-0.262428	Svg148	Paired	17	-0.365406	Svg148	Paired	17	-1.02639	Svg148	Paired	17	-0.602253	Svg148	Paired	17	0.543858	Svg148	Paired	17	-0.274404	Svg148	Paired	17	0.175295	Svg148	Paired	17	0.526223	Svg148	Paired	17	-0.342547	Svg148	Paired	17	0.210848
Svg148	Paired	18	-0.0918096	Svg148	Paired	18	-0.350393	Svg148	Paired	18	-0.0533352	Svg148	Paired	18	-0.375124	Svg148	Paired	18	-0.911134	Svg148	Paired	18	-0.302243	Svg148	Paired	18	0.676102	Svg148	Paired	18	-0.256344	Svg148	Paired	18	1.41165	Svg148	Paired	18	0.799064	Svg148	Paired	18	1.79995
Svg148	Paired	19	0.353772	Svg148	Paired	19	-0.883779	Svg148	Paired	19	0.0358716	Svg148	Paired	19	-0.51603	Svg148	Paired	19	-0.273668	Svg148	Paired	19	-0.365131	Svg148	Paired	19	-0.19656	Svg148	Paired	19	-0.257731	Svg148	Paired	19	-0.834346	Svg148	Paired	19	0.537043	Svg148	Paired	19	0.688901
Svg148	Paired	20	-0.295002	Svg148	Paired	20	-1.13186	Svg148	Paired	20	0.364292	Svg148	Paired	20	-0.439768	Svg148	Paired	20	-0.209866	Svg148	Paired	20	-0.581938	Svg148	Paired	20	-0.0428425	Svg148	Paired	20	-0.350946	Svg148	Paired	20	0.190372	Svg148	Paired	20	0.159697	Svg148	Paired	20	1.38652
Svg148	Paired	21	0.952569	Svg148	Paired	21	-0.93842	Svg148	Paired	21	-0.861959	Svg148	Paired	21	-0.33887	Svg148	Paired	21	-0.106718	Svg148	Paired	21	-0.614229	Svg148	Paired	21	-0.959915	Svg148	Paired	21	-0.677395	Svg148	Paired	21	0.792689	Svg148	Paired	21	-0.241385	Svg148	Paired	21	1.31603
Svg148	Paired	22	0.69565	Svg148	Paired	22	-0.89676	Svg148	Paired	22	-1.08303	Svg148	Paired	22	-0.743804	Svg148	Paired	22	-0.636241	Svg148	Paired	22	0.40874	Svg148	Paired	22	-0.86619	Svg148	Paired	22	-0.424859	Svg148	Paired	22	-0.106899	Svg148	Paired	22	-0.286844	Svg148	Paired	22	0.911866
Svg148	Paired	23	0.844062	Svg148	Paired	23	-0.86632	Svg148	Paired	23	-0.201294	Svg148	Paired	23	-0.95797	Svg148	Paired	23	-0.424111	Svg148	Paired	23	-0.619747	Svg148	Paired	23	-0.375294	Svg148	Paired	23	-1.00908	Svg148	Paired	23	-0.383818	Svg148	Paired	23	0.108372	Svg148	Paired	23	0.988481
Svg148	Paired	24	0.680451	Svg148	Paired	24	-0.364573	Svg148	Paired	24	-0.447524	Svg148	Paired	24	-0.629876	Svg148	Paired	24	-0.569798	Svg148	Paired	24	-0.358577	Svg148	Paired	24	-0.753226	Svg148	Paired	24	0.201807	Svg148	Paired	24	1.63873	Svg148	Paired	24	0.0727881	Svg148	Paired	24	1.22327
Svg148	Paired	25	0.341547	Svg148	Paired	25	0.101927	Svg148	Paired	25	-0.0339209	Svg148	Paired	25	-0.766898	Svg148	Paired	25	-0.678241	Svg148	Paired	25	-1.07254	Svg148	Paired	25	-0.737002	Svg148	Paired	25	0.168912	Svg148	Paired	25	0.238235	Svg148	Paired	25	-0.336981	Svg148	Paired	25	0.669727
Svg148	Paired	26	1.06681	Svg148	Paired	26	-0.874305	Svg148	Paired	26	-0.751625	Svg148	Paired	26	-0.118259	Svg148	Paired	26	-0.16481	Svg148	Paired	26	-0.672286	Svg148	Paired	26	-0.603435	Svg148	Paired	26	0.0372027	Svg148	Paired	26	0.148292	Svg148	Paired	26	-0.362755	Svg148	Paired	26	1.79409
Svg148	Paired	27	0.745099	Svg148	Paired	27	-0.772989	Svg148	Paired	27	-1.08685	Svg148	Paired	27	-0.114016	Svg148	Paired	27	-1.15687	Svg148	Paired	27	0.242119	Svg148	Paired	27	0.0567751	Svg148	Paired	27	0.340385	Svg148	Paired	27	-0.225007	Svg148	Paired	27	0.235075	Svg148	Paired	27	0.130799
Svg148	Paired	28	1.63939	Svg148	Paired	28	-0.0432225	Svg148	Paired	28	0.452309	Svg148	Paired	28	-0.199347	Svg148	Paired	28	1.10322	Svg148	Paired	28	-0.384929	Svg148	Paired	28	-0.34388	Svg148	Paired	28	-0.470731	Svg148	Paired	28	1.49179	Svg148	Paired	28	1.55135	Svg148	Paired	28	1.04776
Svg148	Paired	29	0.520442	Svg148	Paired	29	-0.705165	Svg148	Paired	29	-0.963372	Svg148	Paired	29	-0.906901	Svg148	Paired	29	0.0740147	Svg148	Paired	29	0.455007	Svg148	Paired	29	-0.425955	Svg148	Paired	29	-1.45201	Svg148	Paired	29	0.4243	Svg148	Paired	29	0.218438	Svg148	Paired	29	1.39705
Svg148	Paired	30	-0.0684835	Svg148	Paired	30	0.510818	Svg148	Paired	30	-0.442995	Svg148	Paired	30	-0.212872	Svg148	Paired	30	-1.27092	Svg148	Paired	30	0.0346219	Svg148	Paired	30	-0.375313	Svg148	Paired	30	-0.0621458	Svg148	Paired	30	1.77565	Svg148	Paired	30	-1.52456	Svg148	Paired	30	-1.24192
Svg151	Paired	1	1.74375	Svg151	Paired	1	0.933113	Svg151	Paired	1	0.621038	Svg151	Paired	1	-0.516505	Svg151	Paired	1	-0.775051	Svg151	Paired	1	-0.183239	Svg151	Paired	1	-0.360028	Svg151	Paired	1	-0.842423	Svg151	Paired	1	1.16801	Svg151	Paired	1	1.08487	Svg151	Paired	1	1.18206
Svg151	Paired	2	1.40817	Svg151	Paired	2	0.0583039	Svg151	Paired	2	0.271903	Svg151	Paired	2	-0.0906488	Svg151	Paired	2	-0.0185721	Svg151	Paired	2	-0.363426	Svg151	Paired	2	-0.157638	Svg151	Paired	2	1.1251	Svg151	Paired	2	0.885543	Svg151	Paired	2	0.0107203	Svg151	Paired	2	1.21011
Svg151	Paired	3	0.774223	Svg151	Paired	3	0.513283	Svg151	Paired	3	0.299456	Svg151	Paired	3	-0.233849	Svg151	Paired	3	-0.269938	Svg151	Paired	3	0.0856012	Svg151	Paired	3	-0.737021	Svg151	Paired	3	0.300696	Svg151	Paired	3	0.37164	Svg151	Paired	3	1.98576	Svg151	Paired	3	0.461352
Svg151	Paired	4	2.02894	Svg151	Paired	4	0.989148	Svg151	Paired	4	1.0448	Svg151	Paired	4	-0.0498346	Svg151	Paired	4	-0.754817	Svg151	Paired	4	-0.814034	Svg151	Paired	4	-0.962899	Svg151	Paired	4	1.72205	Svg151	Paired	4	-0.366091	Svg151	Paired	4	2.38652	Svg151	Paired	4	1.31507
Svg151	Paired	5	0.907954	Svg151	Paired	5	1.1292	Svg151	Paired	5	-0.587514	Svg151	Paired	5	-0.778832	Svg151	Paired	5	-0.854167	Svg151	Paired	5	-0.304184	Svg151	Paired	5	0.510029	Svg151	Paired	5	-0.0449411	Svg151	Paired	5	-0.686925	Svg151	Paired	5	1.41956	Svg151	Paired	5	0.87266
Svg151	Paired	6	0.571672	Svg151	Paired	6	0.579609	Svg151	Paired	6	-0.441091	Svg151	Paired	6	-1.44304	Svg151	Paired	6	-0.331427	Svg151	Paired	6	-0.0619086	Svg151	Paired	6	-0.378377	Svg151	Paired	6	-0.0571475	Svg151	Paired	6	0.152404	Svg151	Paired	6	1.09752	Svg151	Paired	6	0.663313
Svg151	Paired	7	0.265059	Svg151	Paired	7	0.581409	Svg151	Paired	7	-0.446968	Svg151	Paired	7	0.278834	Svg151	Paired	7	0.466858	Svg151	Paired	7	0.0245916	Svg151	Paired	7	0.14137	Svg151	Paired	7	0.374369	Svg151	Paired	7	0.345702	Svg151	Paired	7	1.4145	Svg151	Paired	7	0.961166
Svg151	Paired	8	0.601841	Svg151	Paired	8	0.297015	Svg151	Paired	8	-0.653943	Svg151	Paired	8	-0.932371	Svg151	Paired	8	-0.720969	Svg151	Paired	8	-0.179123	Svg151	Paired	8	0.0366621	Svg151	Paired	8	0.794557	Svg151	Paired	8	-0.0199056	Svg151	Paired	8	0.140399	Svg151	Paired	8	1.11995
Svg151	Paired	9	0.456959	Svg151	Paired	9	0.551677	Svg151	Paired	9	0.573308	Svg151	Paired	9	-0.427604	Svg151	Paired	9	0.0298609	Svg151	Paired	9	-0.260822	Svg151	Paired	9	-0.76572	Svg151	Paired	9	0.14674	Svg151	Paired	9	0.608759	Svg151	Paired	9	0.207032	Svg151	Paired	9	0.370989
Svg151	Paired	10	1.00944	Svg151	Paired	10	0.258037	Svg151	Paired	10	-0.4017	Svg151	Paired	10	-0.382569	Svg151	Paired	10	-0.496969	Svg151	Paired	10	-0.157553	Svg151	Paired	10	-0.546088	Svg151	Paired	10	-0.11324	Svg151	Paired	10	0.852228	Svg151	Paired	10	0.386994	Svg151	Paired	10	1.76474
Svg151	Paired	11	1.67532	Svg151	Paired	11	0.456218	Svg151	Paired	11	-0.585166	Svg151	Paired	11	-0.453386	Svg151	Paired	11	-0.566604	Svg151	Paired	11	-0.162968	Svg151	Paired	11	-0.629488	Svg151	Paired	11	1.35459	Svg151	Paired	11	0.251798	Svg151	Paired	11	1.05349	Svg151	Paired	11	0.857396
Svg151	Paired	12	-0.0161554	Svg151	Paired	12	0.604881	Svg151	Paired	12	-0.160677	Svg151	Paired	12	-0.387876	Svg151	Paired	12	0.296152	Svg151	Paired	12	0.126895	Svg151	Paired	12	-0.618876	Svg151	Paired	12	-0.146505	Svg151	Paired	12	1.15364	Svg151	Paired	12	0.726468	Svg151	Paired	12	1.12616
Svg151	Paired	13	0.224713	Svg151	Paired	13	-0.332706	Svg151	Paired	13	-0.62366	Svg151	Paired	13	-0.682407	Svg151	Paired	13	-0.72922	Svg151	Paired	13	0.985017	Svg151	Paired	13	0.0544813	Svg151	Paired	13	-0.450916	Svg151	Paired	13	0.405512	Svg151	Paired	13	0.63573	Svg151	Paired	13	0.796088
Svg151	Paired	14	-0.27209	Svg151	Paired	14	-0.331399	Svg151	Paired	14	-0.0952522	Svg151	Paired	14	-0.791223	Svg151	Paired	14	0.0257786	Svg151	Paired	14	-0.283112	Svg151	Paired	14	-0.373691	Svg151	Paired	14	-0.483657	Svg151	Paired	14	-0.140019	Svg151	Paired	14	0.766968	Svg151	Paired	14	1.74479
Svg151	Paired	15	1.10908	Svg151	Paired	15	-0.604717	Svg151	Paired	15	-0.346334	Svg151	Paired	15	-0.888795	Svg151	Paired	15	-0.217504	Svg151	Paired	15	-0.385214	Svg151	Paired	15	-0.211717	Svg151	Paired	15	0.0976549	Svg151	Paired	15	0.357243	Svg151	Paired	15	-0.138977	Svg151	Paired	15	0.862491
Svg151	Paired	16	-0.0866559	Svg151	Paired	16	0.0825767	Svg151	Paired	16	-0.09895	Svg151	Paired	16	-0.318925	Svg151	Paired	16	0.980341	Svg151	Paired	16	-0.416586	Svg151	Paired	16	-0.522475	Svg151	Paired	16	-0.667317	Svg151	Paired	16	-0.0548317	Svg151	Paired	16	1.79833	Svg151	Paired	16	1.11684
Svg151	Paired	17	1.25234	Svg151	Paired	17	0.752239	Svg151	Paired	17	-0.418738	Svg151	Paired	17	-0.107765	Svg151	Paired	17	-0.769535	Svg151	Paired	17	-0.354168	Svg151	Paired	17	0.285581	Svg151	Paired	17	-0.892556	Svg151	Paired	17	1.68485	Svg151	Paired	17	0.626842	Svg151	Paired	17	1.62638
Svg151	Paired	18	1.52357	Svg151	Paired	18	0.427472	Svg151	Paired	18	0.568843	Svg151	Paired	18	-0.0179327	Svg151	Paired	18	0.0336054	Svg151	Paired	18	0.46113	Svg151	Paired	18	-0.315378	Svg151	Paired	18	-0.38437	Svg151	Paired	18	-0.120873	Svg151	Paired	18	0.52367	Svg151	Paired	18	1.62371
Svg151	Paired	19	0.783905	Svg151	Paired	19	0.491853	Svg151	Paired	19	-0.765251	Svg151	Paired	19	-0.397886	Svg151	Paired	19	-0.153297	Svg151	Paired	19	-0.0973126	Svg151	Paired	19	-0.0968118	Svg151	Paired	19	-0.31788	Svg151	Paired	19	0.711777	Svg151	Paired	19	0.376609	Svg151	Paired	19	0.769217
Svg151	Paired	20	1.04059	Svg151	Paired	20	1.07667	Svg151	Paired	20	-0.442005	Svg151	Paired	20	-0.618215	Svg151	Paired	20	0.0364269	Svg151	Paired	20	-0.64534	Svg151	Paired	20	-0.460044	Svg151	Paired	20	-0.692691	Svg151	Paired	20	0.2981	Svg151	Paired	20	1.00374	Svg151	Paired	20	0.667249
Svg151	Paired	21	0.912558	Svg151	Paired	21	0.0861066	Svg151	Paired	21	-1.09301	Svg151	Paired	21	1.88585	Svg151	Paired	21	-0.249715	Svg151	Paired	21	0.706371	Svg151	Paired	21	-0.3283	Svg151	Paired	21	-0.3498	Svg151	Paired	21	-0.0563776	Svg151	Paired	21	1.1639	Svg151	Paired	21	0.649965
Svg151	Paired	22	1.01988	Svg151	Paired	22	0.820587	Svg151	Paired	22	-1.00144	Svg151	Paired	22	-1.03898	Svg151	Paired	22	-0.279782	Svg151	Paired	22	0.296198	Svg151	Paired	22	-0.556213	Svg151	Paired	22	0.137237	Svg151	Paired	22	0.0326825	Svg151	Paired	22	-0.00417898	Svg151	Paired	22	1.85505
Svg151	Paired	23	1.0945	Svg151	Paired	23	0.96391	Svg151	Paired	23	-0.928804	Svg151	Paired	23	0.0466766	Svg151	Paired	23	-0.725462	Svg151	Paired	23	-0.306831	Svg151	Paired	23	-0.082436	Svg151	Paired	23	-0.66308	Svg151	Paired	23	0.30114	Svg151	Paired	23	1.02057	Svg151	Paired	23	1.36254
Svg151	Paired	24	0.656487	Svg151	Paired	24	-0.788566	Svg151	Paired	24	-0.701161	Svg151	Paired	24	-0.64041	Svg151	Paired	24	0.114565	Svg151	Paired	24	-0.156774	Svg151	Paired	24	-0.777552	Svg151	Paired	24	-0.554676	Svg151	Paired	24	0.116874	Svg151	Paired	24	0.832385	Svg151	Paired	24	0.732424
Svg151	Paired	25	1.99683	Svg151	Paired	25	2.40121	Svg151	Paired	25	-1.05006	Svg151	Paired	25	-0.767044	Svg151	Paired	25	-0.570198	Svg151	Paired	25	-0.00438859	Svg151	Paired	25	-0.286331	Svg151	Paired	25	-0.607685	Svg151	Paired	25	0.0724963	Svg151	Paired	25	0.533549	Svg151	Paired	25	1.0657
Svg151	Paired	26	1.66392	Svg151	Paired	26	0.890548	Svg151	Paired	26	0.0832128	Svg151	Paired	26	-0.704071	Svg151	Paired	26	-0.23569	Svg151	Paired	26	-0.899117	Svg151	Paired	26	-0.611498	Svg151	Paired	26	-0.00393587	Svg151	Paired	26	0.266498	Svg151	Paired	26	0.524931	Svg151	Paired	26	0.378479
Svg151	Paired	27	1.50913	Svg151	Paired	27	-0.21779	Svg151	Paired	27	-0.825895	Svg151	Paired	27	-0.635764	Svg151	Paired	27	-0.621232	Svg151	Paired	27	-0.915489	Svg151	Paired	27	-0.696051	Svg151	Paired	27	-0.926204	Svg151	Paired	27	-0.0323417	Svg151	Paired	27	0.276704	Svg151	Paired	27	1.07254
Svg151	Paired	28	1.5879	Svg151	Paired	28	-0.103274	Svg151	Paired	28	-0.620873	Svg151	Paired	28	-0.966633	Svg151	Paired	28	-1.10319	Svg151	Paired	28	0.885268	Svg151	Paired	28	-0.424042	Svg151	Paired	28	0.0128849	Svg151	Paired	28	-0.013924	Svg151	Paired	28	1.76197	Svg151	Paired	28	0.638052
Svg151	Paired	29	-0.0802671	Svg151	Paired	29	0.0691672	Svg151	Paired	29	-0.0744018	Svg151	Paired	29	-0.569202	Svg151	Paired	29	-0.635982	Svg151	Paired	29	-0.65186	Svg151	Paired	29	-0.290415	Svg151	Paired	29	-0.903198	Svg151	Paired	29	-0.277855	Svg151	Paired	29	0.907096	Svg151	Paired	29	0.992519
Svg151	Paired	30	0.776582	Svg151	Paired	30	0.117611	Svg151	Paired	30	-0.863308	Svg151	Paired	30	-0.936663	Svg151	Paired	30	-1.8905	Svg151	Paired	30	-0.302072	Svg151	Paired	30	-0.611404	Svg151	Paired	30	-1.42442	Svg151	Paired	30	-0.665054	Svg151	Paired	30	-0.33537	Svg151	Paired	30	0.819904
Svg156	Paired	1	1.37955	Svg156	Paired	1	1.00045	Svg156	Paired	1	0.414618	Svg156	Paired	1	0.0206605	Svg156	Paired	1	-0.618965	Svg156	Paired	1	-0.272927	Svg156	Paired	1	-0.472423	Svg156	Paired	1	-0.86634	Svg156	Paired	1	-0.990681	Svg156	Paired	1	2.37067	Svg156	Paired	1	1.69789
Svg156	Paired	2	1.62914	Svg156	Paired	2	0.484248	Svg156	Paired	2	0.0847857	Svg156	Paired	2	0.58236	Svg156	Paired	2	-0.430971	Svg156	Paired	2	-0.313166	Svg156	Paired	2	0.696052	Svg156	Paired	2	-0.213542	Svg156	Paired	2	0.939181	Svg156	Paired	2	0.900038	Svg156	Paired	2	1.04943
Svg156	Paired	3	1.14584	Svg156	Paired	3	0.753452	Svg156	Paired	3	-0.769202	Svg156	Paired	3	-0.662778	Svg156	Paired	3	0.791813	Svg156	Paired	3	-0.53579	Svg156	Paired	3	-0.228311	Svg156	Paired	3	0.179121	Svg156	Paired	3	0.034468	Svg156	Paired	3	1.44996	Svg156	Paired	3	0.676587
Svg156	Paired	4	0.204701	Svg156	Paired	4	-0.195676	Svg156	Paired	4	-0.170058	Svg156	Paired	4	-0.345036	Svg156	Paired	4	0.291153	Svg156	Paired	4	-0.211857	Svg156	Paired	4	-0.607744	Svg156	Paired	4	-0.414497	Svg156	Paired	4	0.385294	Svg156	Paired	4	1.15691	Svg156	Paired	4	1.4081
Svg156	Paired	5	1.43629	Svg156	Paired	5	0.0579879	Svg156	Paired	5	1.65654	Svg156	Paired	5	-0.0295674	Svg156	Paired	5	-0.533131	Svg156	Paired	5	-0.107772	Svg156	Paired	5	0.0749026	Svg156	Paired	5	-0.0235461	Svg156	Paired	5	0.541422	Svg156	Paired	5	0.875884	Svg156	Paired	5	2.01245
Svg156	Paired	6	0.859028	Svg156	Paired	6	0.380388	Svg156	Paired	6	-0.205391	Svg156	Paired	6	-0.569356	Svg156	Paired	6	0.557389	Svg156	Paired	6	-0.250409	Svg156	Paired	6	0.753761	Svg156	Paired	6	-0.538732	Svg156	Paired	6	-0.0920615	Svg156	Paired	6	1.36594	Svg156	Paired	6	0.965248
Svg156	Paired	7	1.1442	Svg156	Paired	7	1.78373	Svg156	Paired	7	0.181905	Svg156	Paired	7	-0.00190872	Svg156	Paired	7	-0.243686	Svg156	Paired	7	-0.0892307	Svg156	Paired	7	-0.359382	Svg156	Paired	7	-0.842692	Svg156	Paired	7	0.61806	Svg156	Paired	7	0.774166	Svg156	Paired	7	1.06269
Svg156	Paired	8	1.68349	Svg156	Paired	8	0.312172	Svg156	Paired	8	-0.249866	Svg156	Paired	8	-0.700151	Svg156	Paired	8	1.03941	Svg156	Paired	8	0.0828747	Svg156	Paired	8	0.509749	Svg156	Paired	8	0.887329	Svg156	Paired	8	0.640005	Svg156	Paired	8	1.41346	Svg156	Paired	8	1.46161
Svg156	Paired	9	0.207741	Svg156	Paired	9	-0.775784	Svg156	Paired	9	-0.255995	Svg156	Paired	9	-0.0315686	Svg156	Paired	9	-0.569412	Svg156	Paired	9	0.045404	Svg156	Paired	9	-0.76833	Svg156	Paired	9	-0.134784	Svg156	Paired	9	0.198675	Svg156	Paired	9	-0.191849	Svg156	Paired	9	1.42504
Svg156	Paired	10	0.965437	Svg156	Paired	10	0.285959	Svg156	Paired	10	-0.0235727	Svg156	Paired	10	-0.46342	Svg156	Paired	10	-0.386587	Svg156	Paired	10	-0.634531	Svg156	Paired	10	0.276897	Svg156	Paired	10	0.08148	Svg156	Paired	10	-0.174849	Svg156	Paired	10	0.364083	Svg156	Paired	10	1.52214
Svg156	Paired	11	0.560908	Svg156	Paired	11	-0.12467	Svg156	Paired	11	-0.223499	Svg156	Paired	11	-0.588061	Svg156	Paired	11	-0.516093	Svg156	Paired	11	1.25033	Svg156	Paired	11	-0.759311	Svg156	Paired	11	-0.421406	Svg156	Paired	11	1.72595	Svg156	Paired	11	1.19782	Svg156	Paired	11	0.945073
Svg156	Paired	12	0.830046	Svg156	Paired	12	-0.481302	Svg156	Paired	12	-0.0464824	Svg156	Paired	12	-0.271715	Svg156	Paired	12	-0.200913	Svg156	Paired	12	0.33127	Svg156	Paired	12	-1.0617	Svg156	Paired	12	-0.510671	Svg156	Paired	12	-0.0739759	Svg156	Paired	12	0.430999	Svg156	Paired	12	0.949601
Svg156	Paired	13	0.673165	Svg156	Paired	13	0.759794	Svg156	Paired	13	-0.907742	Svg156	Paired	13	-1.09971	Svg156	Paired	13	-0.580951	Svg156	Paired	13	-0.0643054	Svg156	Paired	13	0.925355	Svg156	Paired	13	1.06749	Svg156	Paired	13	-0.762232	Svg156	Paired	13	1.14803	Svg156	Paired	13	0.760184
Svg156	Paired	14	1.6427	Svg156	Paired	14	-1.17491	Svg156	Paired	14	0.0450581	Svg156	Paired	14	-0.0541153	Svg156	Paired	14	-0.0452114	Svg156	Paired	14	-0.40858	Svg156	Paired	14	0.0227548	Svg156	Paired	14	-0.763173	Svg156	Paired	14	0.116985	Svg156	Paired	14	0.0176599	Svg156	Paired	14	0.683009
Svg156	Paired	15	0.307244	Svg156	Paired	15	-0.438911	Svg156	Paired	15	0.134944	Svg156	Paired	15	0.114275	Svg156	Paired	15	-0.0320218	Svg156	Paired	15	0.184041	Svg156	Paired	15	-0.381719	Svg156	Paired	15	-0.422348	Svg156	Paired	15	-0.278727	Svg156	Paired	15	0.194877	Svg156	Paired	15	0.836444
Svg156	Paired	16	1.89492	Svg156	Paired	16	-0.777174	Svg156	Paired	16	-0.629984	Svg156	Paired	16	1.50704	Svg156	Paired	16	0.449219	Svg156	Paired	16	-0.914958	Svg156	Paired	16	-0.739012	Svg156	Paired	16	-0.345251	Svg156	Paired	16	-0.293209	Svg156	Paired	16	-0.369375	Svg156	Paired	16	0.804354
Svg156	Paired	17	1.36544	Svg156	Paired	17	0.384272	Svg156	Paired	17	-0.891033	Svg156	Paired	17	-0.0213703	Svg156	Paired	17	-0.354795	Svg156	Paired	17	-0.508227	Svg156	Paired	17	-0.217004	Svg156	Paired	17	-0.261419	Svg156	Paired	17	-0.523722	Svg156	Paired	17	0.152993	Svg156	Paired	17	1.24201
Svg156	Paired	18	0.429836	Svg156	Paired	18	1.18276	Svg156	Paired	18	-0.278121	Svg156	Paired	18	-0.912714	Svg156	Paired	18	-0.511246	Svg156	Paired	18	-0.491161	Svg156	Paired	18	-0.148897	Svg156	Paired	18	-0.35314	Svg156	Paired	18	-0.768422	Svg156	Paired	18	0.0580334	Svg156	Paired	18	0.806041
Svg156	Paired	19	1.14503	Svg156	Paired	19	-0.802101	Svg156	Paired	19	-0.220179	Svg156	Paired	19	-0.0376515	Svg156	Paired	19	0.0350379	Svg156	Paired	19	-0.0639832	Svg156	Paired	19	-0.571899	Svg156	Paired	19	-0.283223	Svg156	Paired	19	0.507692	Svg156	Paired	19	-0.596147	Svg156	Paired	19	0.635717
Svg156	Paired	20	0.760904	Svg156	Paired	20	-0.662702	Svg156	Paired	20	0.226747	Svg156	Paired	20	1.19647	Svg156	Paired	20	-0.378284	Svg156	Paired	20	0.295873	Svg156	Paired	20	1.14712	Svg156	Paired	20	-0.0558699	Svg156	Paired	20	-0.762077	Svg156	Paired	20	0.545395	Svg156	Paired	20	0.793819
Svg156	Paired	21	0.705228	Svg156	Paired	21	-0.680768	Svg156	Paired	21	-0.247321	Svg156	Paired	21	-0.536655	Svg156	Paired	21	-0.927933	Svg156	Paired	21	-1.11228	Svg156	Paired	21	-0.744521	Svg156	Paired	21	-0.203505	Svg156	Paired	21	-0.49734	Svg156	Paired	21	-1.08335	Svg156	Paired	21	-0.304389
Svg156	Paired	22	0.315334	Svg156	Paired	22	-0.624035	Svg156	Paired	22	-0.392127	Svg156	Paired	22	-0.261097	Svg156	Paired	22	-0.587262	Svg156	Paired	22	-0.746877	Svg156	Paired	22	0.163555	Svg156	Paired	22	-0.608664	Svg156	Paired	22	-0.0715669	Svg156	Paired	22	0.36212	Svg156	Paired	22	0.44131
Svg156	Paired	23	0.525541	Svg156	Paired	23	0.98276	Svg156	Paired	23	-0.47987	Svg156	Paired	23	-0.409828	Svg156	Paired	23	-0.298893	Svg156	Paired	23	0.757115	Svg156	Paired	23	-0.150026	Svg156	Paired	23	-0.370399	Svg156	Paired	23	-0.436939	Svg156	Paired	23	-0.168512	Svg156	Paired	23	-0.554465
Svg156	Paired	24	0.775619	Svg156	Paired	24	-0.286052	Svg156	Paired	24	-0.907146	Svg156	Paired	24	0.337959	Svg156	Paired	24	-0.18185	Svg156	Paired	24	-0.40254	Svg156	Paired	24	-0.132045	Svg156	Paired	24	-0.48217	Svg156	Paired	24	-0.866406	Svg156	Paired	24	-0.0806544	Svg156	Paired	24	-0.329607
Svg156	Paired	25	1.13016	Svg156	Paired	25	0.0507768	Svg156	Paired	25	0.441162	Svg156	Paired	25	-0.285217	Svg156	Paired	25	-0.64485	Svg156	Paired	25	0.107601	Svg156	Paired	25	-0.258171	Svg156	Paired	25	-0.530893	Svg156	Paired	25	-0.266595	Svg156	Paired	25	0.833293	Svg156	Paired	25	0.145359
Svg156	Paired	26	0.519278	Svg156	Paired	26	-0.180509	Svg156	Paired	26	-0.8157	Svg156	Paired	26	-0.490679	Svg156	Paired	26	-0.162361	Svg156	Paired	26	-0.243418	Svg156	Paired	26	-0.298704	Svg156	Paired	26	-0.6425	Svg156	Paired	26	0.170471	Svg156	Paired	26	0.373861	Svg156	Paired	26	0.293813
Svg156	Paired	27	1.43035	Svg156	Paired	27	1.29633	Svg156	Paired	27	1.38777	Svg156	Paired	27	0.11505	Svg156	Paired	27	0.255381	Svg156	Paired	27	-0.80387	Svg156	Paired	27	0.105548	Svg156	Paired	27	0.271126	Svg156	Paired	27	0.316071	Svg156	Paired	27	0.0750277	Svg156	Paired	27	0.877031
Svg156	Paired	28	0.970878	Svg156	Paired	28	0.0136806	Svg156	Paired	28	-0.31178	Svg156	Paired	28	0.109783	Svg156	Paired	28	-0.262602	Svg156	Paired	28	0.285767	Svg156	Paired	28	-0.943081	Svg156	Paired	28	-0.00887325	Svg156	Paired	28	-0.296716	Svg156	Paired	28	-0.0376652	Svg156	Paired	28	0.0140201
Svg156	Paired	29	0.0307856	Svg156	Paired	29	-0.48946	Svg156	Paired	29	-0.0149445	Svg156	Paired	29	-0.210413	Svg156	Paired	29	0.133444	Svg156	Paired	29	-0.815148	Svg156	Paired	29	-0.340559	Svg156	Paired	29	-0.636037	Svg156	Paired	29	-0.87903	Svg156	Paired	29	-0.34342	Svg156	Paired	29	-1.00872
Svg156	Paired	30	0.0408529	Svg156	Paired	30	-0.838961	Svg156	Paired	30	-2.2294	Svg156	Paired	30	-1.00514	Svg156	Paired	30	0.136262	Svg156	Paired	30	-0.756767	Svg156	Paired	30	-0.806529	Svg156	Paired	30	-1.1594	Svg156	Paired	30	0.0454174	Svg156	Paired	30	-0.219129	Svg156	Paired	30	0.307691
Svg157	Paired	1	0.703413	Svg157	Paired	1	0.416271	Svg157	Paired	1	-0.395189	Svg157	Paired	1	0.756399	Svg157	Paired	1	-0.840393	Svg157	Paired	1	-0.964483	Svg157	Paired	1	-0.0630811	Svg157	Paired	1	0.0218224	Svg157	Paired	1	0.226348	Svg157	Paired	1	0.729481	Svg157	Paired	1	0.139253
Svg157	Paired	2	-0.291194	Svg157	Paired	2	0.413306	Svg157	Paired	2	-0.0760795	Svg157	Paired	2	0.0662121	Svg157	Paired	2	-0.883672	Svg157	Paired	2	-0.53457	Svg157	Paired	2	1.44138	Svg157	Paired	2	0.0373584	Svg157	Paired	2	0.755321	Svg157	Paired	2	-0.0109433	Svg157	Paired	2	-0.169971
Svg157	Paired	3	-0.13494	Svg157	Paired	3	0.00430941	Svg157	Paired	3	0.118743	Svg157	Paired	3	0.407707	Svg157	Paired	3	-0.749619	Svg157	Paired	3	1.05284	Svg157	Paired	3	-0.541481	Svg157	Paired	3	0.489918	Svg157	Paired	3	0.257811	Svg157	Paired	3	0.695024	Svg157	Paired	3	0.156471
Svg157	Paired	4	0.125227	Svg157	Paired	4	-0.845586	Svg157	Paired	4	-0.471472	Svg157	Paired	4	-0.185943	Svg157	Paired	4	-0.886281	Svg157	Paired	4	-0.0944332	Svg157	Paired	4	-0.46343	Svg157	Paired	4	-0.354203	Svg157	Paired	4	0.274172	Svg157	Paired	4	0.547659	Svg157	Paired	4	0.524749
Svg157	Paired	5	-1.0445	Svg157	Paired	5	-0.30965	Svg157	Paired	5	0.108163	Svg157	Paired	5	-0.569162	Svg157	Paired	5	-0.878925	Svg157	Paired	5	-0.325517	Svg157	Paired	5	-0.305523	Svg157	Paired	5	0.985585	Svg157	Paired	5	-0.147674	Svg157	Paired	5	-0.342281	Svg157	Paired	5	0.177859
Svg157	Paired	6	0.847955	Svg157	Paired	6	-0.199948	Svg157	Paired	6	-0.12685	Svg157	Paired	6	-0.417163	Svg157	Paired	6	0.346954	Svg157	Paired	6	-0.102713	Svg157	Paired	6	0.544081	Svg157	Paired	6	-0.520056	Svg157	Paired	6	-0.311213	Svg157	Paired	6	0.844287	Svg157	Paired	6	-0.344008
Svg157	Paired	7	-0.402239	Svg157	Paired	7	0.039318	Svg157	Paired	7	0.209064	Svg157	Paired	7	-0.400793	Svg157	Paired	7	-0.714817	Svg157	Paired	7	0.404449	Svg157	Paired	7	-0.129874	Svg157	Paired	7	-0.367771	Svg157	Paired	7	0.0688282	Svg157	Paired	7	1.24897	Svg157	Paired	7	3.94033
Svg157	Paired	8	0.357681	Svg157	Paired	8	-0.442604	Svg157	Paired	8	0.579833	Svg157	Paired	8	-0.671592	Svg157	Paired	8	0.0189368	Svg157	Paired	8	-0.29545	Svg157	Paired	8	-1.10335	Svg157	Paired	8	-0.394063	Svg157	Paired	8	0.131407	Svg157	Paired	8	0.422141	Svg157	Paired	8	-0.472562
Svg157	Paired	9	-0.392079	Svg157	Paired	9	-0.675893	Svg157	Paired	9	-0.846129	Svg157	Paired	9	-0.302908	Svg157	Paired	9	-1.39069	Svg157	Paired	9	-0.630735	Svg157	Paired	9	-0.215776	Svg157	Paired	9	0.788937	Svg157	Paired	9	1.10582	Svg157	Paired	9	-0.462568	Svg157	Paired	9	0.424736
Svg157	Paired	10	0.0181347	Svg157	Paired	10	-0.0789459	Svg157	Paired	10	-0.741228	Svg157	Paired	10	0.0601099	Svg157	Paired	10	-0.0725362	Svg157	Paired	10	-0.483168	Svg157	Paired	10	-0.753384	Svg157	Paired	10	-0.966142	Svg157	Paired	10	0.163748	Svg157	Paired	10	0.352879	Svg157	Paired	10	0.101392
Svg157	Paired	11	-0.139256	Svg157	Paired	11	0.42175	Svg157	Paired	11	-0.722489	Svg157	Paired	11	-0.837612	Svg157	Paired	11	-0.630454	Svg157	Paired	11	-0.809837	Svg157	Paired	11	0.050234	Svg157	Paired	11	-0.234618	Svg157	Paired	11	0.209148	Svg157	Paired	11	0.0238214	Svg157	Paired	11	1.36816
Svg157	Paired	12	0.745945	Svg157	Paired	12	-0.471216	Svg157	Paired	12	0.340953	Svg157	Paired	12	-0.174876	Svg157	Paired	12	-0.577553	Svg157	Paired	12	0.00189947	Svg157	Paired	12	-0.205334	Svg157	Paired	12	-0.646303	Svg157	Paired	12	0.425928	Svg157	Paired	12	-0.0581967	Svg157	Paired	12	0.191518
Svg157	Paired	13	-0.469207	Svg157	Paired	13	-0.149073	Svg157	Paired	13	0.00372626	Svg157	Paired	13	0.128229	Svg157	Paired	13	-0.286828	Svg157	Paired	13	-0.30486	Svg157	Paired	13	-0.30008	Svg157	Paired	13	-0.429708	Svg157	Paired	13	-0.013571	Svg157	Paired	13	0.529077	Svg157	Paired	13	2.33432
Svg157	Paired	14	0.227543	Svg157	Paired	14	-0.397354	Svg157	Paired	14	-0.700617	Svg157	Paired	14	-0.569724	Svg157	Paired	14	-0.241001	Svg157	Paired	14	-0.596639	Svg157	Paired	14	-0.633098	Svg157	Paired	14	-0.292081	Svg157	Paired	14	-0.0300631	Svg157	Paired	14	0.894764	Svg157	Paired	14	0.792697
Svg157	Paired	15	-0.484292	Svg157	Paired	15	-0.793361	Svg157	Paired	15	-0.177349	Svg157	Paired	15	-0.453537	Svg157	Paired	15	-0.384815	Svg157	Paired	15	-0.0526712	Svg157	Paired	15	-0.330942	Svg157	Paired	15	-0.386449	Svg157	Paired	15	0.151623	Svg157	Paired	15	-0.0429995	Svg157	Paired	15	0.856202
Svg157	Paired	16	0.376828	Svg157	Paired	16	0.537137	Svg157	Paired	16	-0.266916	Svg157	Paired	16	-0.717363	Svg157	Paired	16	-0.5084	Svg157	Paired	16	-0.660412	Svg157	Paired	16	-0.889318	Svg157	Paired	16	0.249502	Svg157	Paired	16	0.274778	Svg157	Paired	16	0.933315	Svg157	Paired	16	-0.0271016
Svg157	Paired	17	-0.297492	Svg157	Paired	17	-0.268237	Svg157	Paired	17	-0.709689	Svg157	Paired	17	0.141719	Svg157	Paired	17	-0.522456	Svg157	Paired	17	0.109335	Svg157	Paired	17	-0.376937	Svg157	Paired	17	-0.540254	Svg157	Paired	17	0.211862	Svg157	Paired	17	0.0163737	Svg157	Paired	17	0.487479
Svg157	Paired	18	-0.0325219	Svg157	Paired	18	0.574973	Svg157	Paired	18	-0.464593	Svg157	Paired	18	-0.249006	Svg157	Paired	18	1.28149	Svg157	Paired	18	-0.167832	Svg157	Paired	18	-0.485028	Svg157	Paired	18	-0.77239	Svg157	Paired	18	-0.193424	Svg157	Paired	18	-0.77678	Svg157	Paired	18	0.65981
Svg157	Paired	19	0.442567	Svg157	Paired	19	0.514945	Svg157	Paired	19	0.635508	Svg157	Paired	19	0.632447	Svg157	Paired	19	0.496385	Svg157	Paired	19	-0.501929	Svg157	Paired	19	-0.287926	Svg157	Paired	19	-0.222257	Svg157	Paired	19	0.118803	Svg157	Paired	19	0.188345	Svg157	Paired	19	0.701118
Svg157	Paired	20	0.349131	Svg157	Paired	20	-0.35809	Svg157	Paired	20	-0.719338	Svg157	Paired	20	-0.762438	Svg157	Paired	20	0.417375	Svg157	Paired	20	-0.0328098	Svg157	Paired	20	-0.34872	Svg157	Paired	20	-0.314591	Svg157	Paired	20	0.185413	Svg157	Paired	20	0.472325	Svg157	Paired	20	-0.294502
Svg157	Paired	21	0.348755	Svg157	Paired	21	-0.235336	Svg157	Paired	21	-0.701593	Svg157	Paired	21	-0.407153	Svg157	Paired	21	-0.320948	Svg157	Paired	21	-0.0183881	Svg157	Paired	21	-0.906328	Svg157	Paired	21	-0.512718	Svg157	Paired	21	-0.169886	Svg157	Paired	21	-0.203865	Svg157	Paired	21	0.602841
Svg157	Paired	22	0.470044	Svg157	Paired	22	0.0147813	Svg157	Paired	22	-0.0364229	Svg157	Paired	22	-0.197469	Svg157	Paired	22	-0.650058	Svg157	Paired	22	0.426533	Svg157	Paired	22	-0.0342738	Svg157	Paired	22	-0.932974	Svg157	Paired	22	-0.369688	Svg157	Paired	22	-0.232207	Svg157	Paired	22	0.308721
Svg157	Paired	23	0.26446	Svg157	Paired	23	0.390726	Svg157	Paired	23	0.384343	Svg157	Paired	23	0.338924	Svg157	Paired	23	0.0436199	Svg157	Paired	23	-0.615469	Svg157	Paired	23	-0.0943588	Svg157	Paired	23	-0.296785	Svg157	Paired	23	0.0316165	Svg157	Paired	23	-0.404727	Svg157	Paired	23	-0.0176649
Svg157	Paired	24	-0.286577	Svg157	Paired	24	-0.201319	Svg157	Paired	24	-0.547013	Svg157	Paired	24	-0.340499	Svg157	Paired	24	-0.36837	Svg157	Paired	24	-0.659248	Svg157	Paired	24	0.2275	Svg157	Paired	24	-0.21485	Svg157	Paired	24	0.472501	Svg157	Paired	24	0.064693	Svg157	Paired	24	0.320905
Svg157	Paired	25	1.77205	Svg157	Paired	25	-0.440484	Svg157	Paired	25	-0.455856	Svg157	Paired	25	-0.341586	Svg157	Paired	25	-0.679021	Svg157	Paired	25	-0.55142	Svg157	Paired	25	0.0399511	Svg157	Paired	25	-0.150847	Svg157	Paired	25	0.606854	Svg157	Paired	25	1.47199	Svg157	Paired	25	0.497357
Svg157	Paired	26	-0.0835579	Svg157	Paired	26	-0.476424	Svg157	Paired	26	-0.710036	Svg157	Paired	26	-0.202398	Svg157	Paired	26	-0.108974	Svg157	Paired	26	2.18861	Svg157	Paired	26	-0.0936272	Svg157	Paired	26	-0.692082	Svg157	Paired	26	-0.0552453	Svg157	Paired	26	-0.193518	Svg157	Paired	26	1.39482
Svg157	Paired	27	-0.331093	Svg157	Paired	27	-0.544501	Svg157	Paired	27	-0.0836514	Svg157	Paired	27	-0.336256	Svg157	Paired	27	0.301004	Svg157	Paired	27	-0.446196	Svg157	Paired	27	0.335984	Svg157	Paired	27	-0.530417	Svg157	Paired	27	0.102419	Svg157	Paired	27	0.922778	Svg157	Paired	27	-0.286044
Svg157	Paired	28	-0.185036	Svg157	Paired	28	-0.404797	Svg157	Paired	28	-0.229276	Svg157	Paired	28	-0.195558	Svg157	Paired	28	-0.0424915	Svg157	Paired	28	0.337085	Svg157	Paired	28	-0.142009	Svg157	Paired	28	-0.215925	Svg157	Paired	28	-0.0505229	Svg157	Paired	28	0.775032	Svg157	Paired	28	0.0770549
Svg157	Paired	29	0.0719852	Svg157	Paired	29	0.469909	Svg157	Paired	29	-0.710074	Svg157	Paired	29	0.0557003	Svg157	Paired	29	-0.313969	Svg157	Paired	29	-0.74246	Svg157	Paired	29	-0.354604	Svg157	Paired	29	0.298321	Svg157	Paired	29	-0.0488437	Svg157	Paired	29	-0.445165	Svg157	Paired	29	-0.22926
Svg157	Paired	30	-0.200625	Svg157	Paired	30	-1.40134	Svg157	Paired	30	-1.71763	Svg157	Paired	30	-0.365649	Svg157	Paired	30	-1.0943	Svg157	Paired	30	-1.3394	Svg157	Paired	30	-0.791116	Svg157	Paired	30	-1.55607	Svg157	Paired	30	-0.378538	Svg157	Paired	30	0.0817235	Svg157	Paired	30	-0.613969
Svg165	Paired	1	0.529089	Svg165	Paired	1	-0.828952	Svg165	Paired	1	-0.681001	Svg165	Paired	1	-0.587073	Svg165	Paired	1	-0.26429	Svg165	Paired	1	-0.246034	Svg165	Paired	1	-0.0160315	Svg165	Paired	1	0.35061	Svg165	Paired	1	-0.685119	Svg165	Paired	1	0.320462	Svg165	Paired	1	-0.418675
Svg165	Paired	2	-0.395082	Svg165	Paired	2	-0.91124	Svg165	Paired	2	-1.08345	Svg165	Paired	2	-1.13725	Svg165	Paired	2	0.207679	Svg165	Paired	2	-0.595502	Svg165	Paired	2	-0.573575	Svg165	Paired	2	-0.530171	Svg165	Paired	2	-0.238714	Svg165	Paired	2	-0.121247	Svg165	Paired	2	0.490718
Svg165	Paired	3	-0.157507	Svg165	Paired	3	-0.919653	Svg165	Paired	3	-0.370439	Svg165	Paired	3	-1.13903	Svg165	Paired	3	-0.84335	Svg165	Paired	3	-1.03657	Svg165	Paired	3	-0.324195	Svg165	Paired	3	-0.776336	Svg165	Paired	3	0.282541	Svg165	Paired	3	-1.19115	Svg165	Paired	3	-0.487112
Svg165	Paired	4	-0.713065	Svg165	Paired	4	-1.55432	Svg165	Paired	4	-0.76882	Svg165	Paired	4	-0.808966	Svg165	Paired	4	-1.32767	Svg165	Paired	4	-0.949662	Svg165	Paired	4	-0.854262	Svg165	Paired	4	-0.144256	Svg165	Paired	4	-0.955282	Svg165	Paired	4	0.389066	Svg165	Paired	4	-0.635588
Svg165	Paired	5	-0.936794	Svg165	Paired	5	1.17089	Svg165	Paired	5	-1.30097	Svg165	Paired	5	-0.473786	Svg165	Paired	5	0.513329	Svg165	Paired	5	-1.00528	Svg165	Paired	5	-0.243341	Svg165	Paired	5	-0.538185	Svg165	Paired	5	0.481924	Svg165	Paired	5	-0.930814	Svg165	Paired	5	0.543068
Svg165	Paired	6	-0.163122	Svg165	Paired	6	-0.682455	Svg165	Paired	6	-0.256837	Svg165	Paired	6	-0.683822	Svg165	Paired	6	-0.475652	Svg165	Paired	6	0.0867014	Svg165	Paired	6	-0.180696	Svg165	Paired	6	-0.188803	Svg165	Paired	6	-0.37291	Svg165	Paired	6	0.183058	Svg165	Paired	6	-0.513282
Svg165	Paired	7	-0.476256	Svg165	Paired	7	-0.216141	Svg165	Paired	7	-0.660253	Svg165	Paired	7	-0.427536	Svg165	Paired	7	-0.647118	Svg165	Paired	7	-0.376956	Svg165	Paired	7	-0.43183	Svg165	Paired	7	-0.889288	Svg165	Paired	7	0.0283833	Svg165	Paired	7	0.643956	Svg165	Paired	7	0.328494
Svg165	Paired	8	-0.568302	Svg165	Paired	8	1.36215	Svg165	Paired	8	-0.462664	Svg165	Paired	8	-0.584823	Svg165	Paired	8	-0.0928228	Svg165	Paired	8	0.148091	Svg165	Paired	8	-0.4527	Svg165	Paired	8	0.00329465	Svg165	Paired	8	-0.741192	Svg165	Paired	8	-0.164128	Svg165	Paired	8	0.0865222
Svg165	Paired	9	0.0480024	Svg165	Paired	9	0.567893	Svg165	Paired	9	-0.690551	Svg165	Paired	9	-0.982658	Svg165	Paired	9	-0.219076	Svg165	Paired	9	-0.418904	Svg165	Paired	9	-0.401608	Svg165	Paired	9	-0.271559	Svg165	Paired	9	-0.191643	Svg165	Paired	9	-0.128628	Svg165	Paired	9	0.461824
Svg165	Paired	10	-0.36937	Svg165	Paired	10	-0.265754	Svg165	Paired	10	0.151287	Svg165	Paired	10	-0.895956	Svg165	Paired	10	-0.546154	Svg165	Paired	10	-0.611024	Svg165	Paired	10	-0.257389	Svg165	Paired	10	0.200859	Svg165	Paired	10	-0.421343	Svg165	Paired	10	-0.482767	Svg165	Paired	10	0.187074
Svg165	Paired	11	0.0241898	Svg165	Paired	11	-1.22697	Svg165	Paired	11	-0.761653	Svg165	Paired	11	-0.718683	Svg165	Paired	11	-0.789908	Svg165	Paired	11	-0.675459	Svg165	Paired	11	0.104683	Svg165	Paired	11	-0.656768	Svg165	Paired	11	-0.34788	Svg165	Paired	11	0.723485	Svg165	Paired	11	0.353697
Svg165	Paired	12	0.518811	Svg165	Paired	12	-0.974581	Svg165	Paired	12	-0.664126	Svg165	Paired	12	-0.075696	Svg165	Paired	12	-0.437001	Svg165	Paired	12	-0.664583	Svg165	Paired	12	-0.25532	Svg165	Paired	12	-0.655061	Svg165	Paired	12	-0.197228	Svg165	Paired	12	-0.364333	Svg165	Paired	12	-0.337058
Svg165	Paired	13	-0.629258	Svg165	Paired	13	-0.363235	Svg165	Paired	13	-0.649649	Svg165	Paired	13	-0.974055	Svg165	Paired	13	-1.26338	Svg165	Paired	13	-0.285553	Svg165	Paired	13	-0.236403	Svg165	Paired	13	0.48789	Svg165	Paired	13	-0.296238	Svg165	Paired	13	0.170426	Svg165	Paired	13	-0.125922
Svg165	Paired	14	-0.347781	Svg165	Paired	14	-0.322811	Svg165	Paired	14	-0.442872	Svg165	Paired	14	-0.219104	Svg165	Paired	14	-1.13553	Svg165	Paired	14	-0.351914	Svg165	Paired	14	-0.172021	Svg165	Paired	14	-0.595787	Svg165	Paired	14	0.370114	Svg165	Paired	14	-0.881254	Svg165	Paired	14	-0.0101874
Svg165	Paired	15	-0.970035	Svg165	Paired	15	-1.03915	Svg165	Paired	15	-0.733223	Svg165	Paired	15	-0.0570226	Svg165	Paired	15	-0.615543	Svg165	Paired	15	-0.181352	Svg165	Paired	15	-0.421378	Svg165	Paired	15	-0.635154	Svg165	Paired	15	-0.13437	Svg165	Paired	15	-0.506499	Svg165	Paired	15	-0.352971
Svg165	Paired	16	-0.787245	Svg165	Paired	16	-0.530073	Svg165	Paired	16	-0.92172	Svg165	Paired	16	0.397415	Svg165	Paired	16	-1.04632	Svg165	Paired	16	-0.393127	Svg165	Paired	16	0.126747	Svg165	Paired	16	-0.602395	Svg165	Paired	16	0.00229138	Svg165	Paired	16	-0.225178	Svg165	Paired	16	0.357292
Svg165	Paired	17	-0.754069	Svg165	Paired	17	-0.264228	Svg165	Paired	17	-1.02613	Svg165	Paired	17	-0.374928	Svg165	Paired	17	-0.202833	Svg165	Paired	17	-0.417776	Svg165	Paired	17	-0.463639	Svg165	Paired	17	-0.787296	Svg165	Paired	17	0.718439	Svg165	Paired	17	-0.125168	Svg165	Paired	17	-0.346258
Svg165	Paired	18	-1.06927	Svg165	Paired	18	-1.01783	Svg165	Paired	18	0.0793234	Svg165	Paired	18	-0.437717	Svg165	Paired	18	-0.638476	Svg165	Paired	18	-0.524489	Svg165	Paired	18	-0.927861	Svg165	Paired	18	-0.560795	Svg165	Paired	18	0.0471816	Svg165	Paired	18	-0.439066	Svg165	Paired	18	-0.249796
Svg165	Paired	19	-0.616915	Svg165	Paired	19	-0.570023	Svg165	Paired	19	0.998285	Svg165	Paired	19	-0.520832	Svg165	Paired	19	-0.930652	Svg165	Paired	19	-0.726678	Svg165	Paired	19	0.720506	Svg165	Paired	19	-0.297046	Svg165	Paired	19	-1.04754	Svg165	Paired	19	-0.243025	Svg165	Paired	19	0.0853124
Svg165	Paired	20	-0.221593	Svg165	Paired	20	-0.317103	Svg165	Paired	20	-0.332189	Svg165	Paired	20	-1.02183	Svg165	Paired	20	-0.311966	Svg165	Paired	20	-0.557676	Svg165	Paired	20	-0.508391	Svg165	Paired	20	-0.0688526	Svg165	Paired	20	-0.32517	Svg165	Paired	20	0.131397	Svg165	Paired	20	-0.816753
Svg165	Paired	21	0.408886	Svg165	Paired	21	-0.323995	Svg165	Paired	21	0.648565	Svg165	Paired	21	-0.847095	Svg165	Paired	21	-0.788603	Svg165	Paired	21	-0.196988	Svg165	Paired	21	-0.144216	Svg165	Paired	21	-0.479751	Svg165	Paired	21	0.386073	Svg165	Paired	21	-0.213209	Svg165	Paired	21	-0.192513
Svg165	Paired	22	-0.376555	Svg165	Paired	22	0.0692993	Svg165	Paired	22	-0.531486	Svg165	Paired	22	-0.565575	Svg165	Paired	22	-0.258866	Svg165	Paired	22	-0.1061	Svg165	Paired	22	-0.953484	Svg165	Paired	22	-0.68153	Svg165	Paired	22	-0.178274	Svg165	Paired	22	0.610809	Svg165	Paired	22	0.0317692
Svg165	Paired	23	0.250314	Svg165	Paired	23	-0.252812	Svg165	Paired	23	0.131752	Svg165	Paired	23	0.579806	Svg165	Paired	23	-0.900188	Svg165	Paired	23	0.0794543	Svg165	Paired	23	-0.554351	Svg165	Paired	23	-0.972453	Svg165	Paired	23	-0.356803	Svg165	Paired	23	-0.0106817	Svg165	Paired	23	-0.198965
Svg165	Paired	24	-0.569869	Svg165	Paired	24	-0.662014	Svg165	Paired	24	-0.749714	Svg165	Paired	24	-0.2055	Svg165	Paired	24	-0.436657	Svg165	Paired	24	-0.722741	Svg165	Paired	24	-0.226897	Svg165	Paired	24	-0.222573	Svg165	Paired	24	-0.549028	Svg165	Paired	24	0.00360935	Svg165	Paired	24	-0.392549
Svg165	Paired	25	-0.241073	Svg165	Paired	25	0.466928	Svg165	Paired	25	-0.589759	Svg165	Paired	25	-0.348636	Svg165	Paired	25	-0.698887	Svg165	Paired	25	-0.813148	Svg165	Paired	25	-0.873997	Svg165	Paired	25	-0.610531	Svg165	Paired	25	0.110678	Svg165	Paired	25	-0.319108	Svg165	Paired	25	0.412669
Svg165	Paired	26	-0.579459	Svg165	Paired	26	0.075484	Svg165	Paired	26	-0.087665	Svg165	Paired	26	-0.76713	Svg165	Paired	26	-0.634507	Svg165	Paired	26	-0.461507	Svg165	Paired	26	-0.470307	Svg165	Paired	26	-0.300743	Svg165	Paired	26	0.898053	Svg165	Paired	26	-0.620317	Svg165	Paired	26	-0.167019
Svg165	Paired	27	-0.501311	Svg165	Paired	27	0.352293	Svg165	Paired	27	-0.148224	Svg165	Paired	27	-0.375308	Svg165	Paired	27	-0.516516	Svg165	Paired	27	-0.626991	Svg165	Paired	27	-0.248364	Svg165	Paired	27	0.118389	Svg165	Paired	27	-0.855927	Svg165	Paired	27	-0.774288	Svg165	Paired	27	0.0721691
Svg165	Paired	28	-0.695013	Svg165	Paired	28	0.230547	Svg165	Paired	28	-0.0209628	Svg165	Paired	28	0.496968	Svg165	Paired	28	0.307097	Svg165	Paired	28	-0.445277	Svg165	Paired	28	-0.724699	Svg165	Paired	28	-0.285262	Svg165	Paired	28	-0.0240962	Svg165	Paired	28	-0.352142	Svg165	Paired	28	-0.153038
Svg165	Paired	29	-0.009888	Svg165	Paired	29	-0.478583	Svg165	Paired	29	-0.335357	Svg165	Paired	29	0.628606	Svg165	Paired	29	-1.00917	Svg165	Paired	29	-0.778741	Svg165	Paired	29	-0.00538556	Svg165	Paired	29	-1.03744	Svg165	Paired	29	-0.504801	Svg165	Paired	29	-0.0240063	Svg165	Paired	29	0.0582676
Svg165	Paired	30	-0.652737	Svg165	Paired	30	-1.35802	Svg165	Paired	30	-1.50981	Svg165	Paired	30	-2.006	Svg165	Paired	30	-0.848314	Svg165	Paired	30	-1.69039	Svg165	Paired	30	-1.31902	Svg165	Paired	30	-0.578074	Svg165	Paired	30	0.64367	Svg165	Paired	30	-0.882742	Svg165	Paired	30	-0.714485
Svg146	Unpaired	1	1.88807	Svg146	Unpaired	1	1.3355	Svg146	Unpaired	1	1.04751	Svg146	Unpaired	1	1.77234	Svg146	Unpaired	1	1.02623	Svg146	Unpaired	1	1.69568	Svg146	Unpaired	1	1.04062	Svg146	Unpaired	1	2.4836	Svg146	Unpaired	1	0.599448	Svg146	Unpaired	1	0.238126	Svg146	Unpaired	1	1.25104
Svg146	Unpaired	2	2.22116	Svg146	Unpaired	2	2.08812	Svg146	Unpaired	2	0.469543	Svg146	Unpaired	2	1.26215	Svg146	Unpaired	2	0.873932	Svg146	Unpaired	2	1.82954	Svg146	Unpaired	2	0.77689	Svg146	Unpaired	2	1.25601	Svg146	Unpaired	2	0.997039	Svg146	Unpaired	2	1.0333	Svg146	Unpaired	2	1.88438
Svg146	Unpaired	3	1.73165	Svg146	Unpaired	3	1.07913	Svg146	Unpaired	3	0.349888	Svg146	Unpaired	3	0.711591	Svg146	Unpaired	3	0.772228	Svg146	Unpaired	3	1.58763	Svg146	Unpaired	3	2.52041	Svg146	Unpaired	3	0.996305	Svg146	Unpaired	3	0.583498	Svg146	Unpaired	3	0.826325	Svg146	Unpaired	3	0.789464
Svg146	Unpaired	4	1.59681	Svg146	Unpaired	4	1.16009	Svg146	Unpaired	4	0.134974	Svg146	Unpaired	4	0.570223	Svg146	Unpaired	4	0.68226	Svg146	Unpaired	4	1.23325	Svg146	Unpaired	4	1.00869	Svg146	Unpaired	4	1.31039	Svg146	Unpaired	4	-0.0398682	Svg146	Unpaired	4	0.865688	Svg146	Unpaired	4	0.731797
Svg146	Unpaired	5	1.1158	Svg146	Unpaired	5	0.801289	Svg146	Unpaired	5	1.06431	Svg146	Unpaired	5	2.05215	Svg146	Unpaired	5	1.81924	Svg146	Unpaired	5	-0.00660923	Svg146	Unpaired	5	1.01657	Svg146	Unpaired	5	0.658045	Svg146	Unpaired	5	1.14213	Svg146	Unpaired	5	-0.0254734	Svg146	Unpaired	5	0.349272
Svg146	Unpaired	6	0.952909	Svg146	Unpaired	6	1.62899	Svg146	Unpaired	6	0.396937	Svg146	Unpaired	6	0.143777	Svg146	Unpaired	6	1.86843	Svg146	Unpaired	6	1.30116	Svg146	Unpaired	6	0.403123	Svg146	Unpaired	6	0.64152	Svg146	Unpaired	6	0.0490412	Svg146	Unpaired	6	0.563835	Svg146	Unpaired	6	-0.170246
Svg146	Unpaired	7	1.09782	Svg146	Unpaired	7	0.854406	Svg146	Unpaired	7	0.264365	Svg146	Unpaired	7	1.79058	Svg146	Unpaired	7	0.564767	Svg146	Unpaired	7	2.07215	Svg146	Unpaired	7	1.26834	Svg146	Unpaired	7	1.3793	Svg146	Unpaired	7	0.991827	Svg146	Unpaired	7	1.27182	Svg146	Unpaired	7	1.09108
Svg146	Unpaired	8	0.440477	Svg146	Unpaired	8	0.983326	Svg146	Unpaired	8	1.10408	Svg146	Unpaired	8	0.137595	Svg146	Unpaired	8	0.665142	Svg146	Unpaired	8	1.93244	Svg146	Unpaired	8	1.81391	Svg146	Unpaired	8	0.923198	Svg146	Unpaired	8	1.29177	Svg146	Unpaired	8	0.208935	Svg146	Unpaired	8	2.17004
Svg146	Unpaired	9	0.854179	Svg146	Unpaired	9	1.21467	Svg146	Unpaired	9	0.0737299	Svg146	Unpaired	9	1.29842	Svg146	Unpaired	9	0.122051	Svg146	Unpaired	9	1.52632	Svg146	Unpaired	9	0.408447	Svg146	Unpaired	9	0.653622	Svg146	Unpaired	9	1.80986	Svg146	Unpaired	9	0.214382	Svg146	Unpaired	9	0.176343
Svg146	Unpaired	10	0.549662	Svg146	Unpaired	10	0.14137	Svg146	Unpaired	10	0.545501	Svg146	Unpaired	10	0.644849	Svg146	Unpaired	10	0.975777	Svg146	Unpaired	10	0.998146	Svg146	Unpaired	10	-0.14912	Svg146	Unpaired	10	0.794834	Svg146	Unpaired	10	0.80648	Svg146	Unpaired	10	0.645517	Svg146	Unpaired	10	-0.109979
Svg146	Unpaired	11	0.876259	Svg146	Unpaired	11	1.83295	Svg146	Unpaired	11	0.639961	Svg146	Unpaired	11	0.615073	Svg146	Unpaired	11	1.05024	Svg146	Unpaired	11	1.15189	Svg146	Unpaired	11	2.19444	Svg146	Unpaired	11	0.670262	Svg146	Unpaired	11	1.08026	Svg146	Unpaired	11	0.382949	Svg146	Unpaired	11	0.753065
Svg146	Unpaired	12	0.484666	Svg146	Unpaired	12	1.3655	Svg146	Unpaired	12	0.742985	Svg146	Unpaired	12	1.16283	Svg146	Unpaired	12	0.613869	Svg146	Unpaired	12	1.4337	Svg146	Unpaired	12	1.24344	Svg146	Unpaired	12	1.56119	Svg146	Unpaired	12	0.959929	Svg146	Unpaired	12	1.41689	Svg146	Unpaired	12	0.830094
Svg146	Unpaired	13	0.22477	Svg146	Unpaired	13	2.34646	Svg146	Unpaired	13	0.551462	Svg146	Unpaired	13	0.191306	Svg146	Unpaired	13	0.670706	Svg146	Unpaired	13	1.39243	Svg146	Unpaired	13	0.778983	Svg146	Unpaired	13	0.73406	Svg146	Unpaired	13	1.23707	Svg146	Unpaired	13	0.0806274	Svg146	Unpaired	13	0.951414
Svg146	Unpaired	14	0.924715	Svg146	Unpaired	14	0.844082	Svg146	Unpaired	14	1.68625	Svg146	Unpaired	14	0.880467	Svg146	Unpaired	14	0.309985	Svg146	Unpaired	14	1.27804	Svg146	Unpaired	14	0.301755	Svg146	Unpaired	14	0.85257	Svg146	Unpaired	14	-0.27055	Svg146	Unpaired	14	1.91847	Svg146	Unpaired	14	0.854286
Svg146	Unpaired	15	0.23573	Svg146	Unpaired	15	0.691628	Svg146	Unpaired	15	1.84485	Svg146	Unpaired	15	0.698386	Svg146	Unpaired	15	0.54141	Svg146	Unpaired	15	1.0334	Svg146	Unpaired	15	0.989502	Svg146	Unpaired	15	0.78251	Svg146	Unpaired	15	1.45344	Svg146	Unpaired	15	1.54682	Svg146	Unpaired	15	0.943283
Svg146	Unpaired	16	0.70086	Svg146	Unpaired	16	1.13469	Svg146	Unpaired	16	0.524901	Svg146	Unpaired	16	0.509825	Svg146	Unpaired	16	0.545668	Svg146	Unpaired	16	1.05606	Svg146	Unpaired	16	1.39888	Svg146	Unpaired	16	0.890111	Svg146	Unpaired	16	1.96518	Svg146	Unpaired	16	0.625524	Svg146	Unpaired	16	0.115078
Svg146	Unpaired	17	0.818817	Svg146	Unpaired	17	0.985571	Svg146	Unpaired	17	0.086654	Svg146	Unpaired	17	1.51492	Svg146	Unpaired	17	0.98154	Svg146	Unpaired	17	1.36416	Svg146	Unpaired	17	0.680829	Svg146	Unpaired	17	1.63918	Svg146	Unpaired	17	1.73506	Svg146	Unpaired	17	1.797	Svg146	Unpaired	17	0.941742
Svg146	Unpaired	18	-0.0416529	Svg146	Unpaired	18	2.31543	Svg146	Unpaired	18	0.656647	Svg146	Unpaired	18	0.918891	Svg146	Unpaired	18	1.12092	Svg146	Unpaired	18	1.1244	Svg146	Unpaired	18	1.01661	Svg146	Unpaired	18	0.94825	Svg146	Unpaired	18	1.32771	Svg146	Unpaired	18	0.0534061	Svg146	Unpaired	18	0.918574
Svg146	Unpaired	19	0.899552	Svg146	Unpaired	19	0.523371	Svg146	Unpaired	19	0.706364	Svg146	Unpaired	19	2.08364	Svg146	Unpaired	19	1.341	Svg146	Unpaired	19	0.848954	Svg146	Unpaired	19	0.582331	Svg146	Unpaired	19	0.0776704	Svg146	Unpaired	19	0.418969	Svg146	Unpaired	19	1.90799	Svg146	Unpaired	19	0.147822
Svg146	Unpaired	20	0.561838	Svg146	Unpaired	20	2.07231	Svg146	Unpaired	20	0.715128	Svg146	Unpaired	20	0.446808	Svg146	Unpaired	20	2.0757	Svg146	Unpaired	20	1.47448	Svg146	Unpaired	20	-0.230296	Svg146	Unpaired	20	1.67715	Svg146	Unpaired	20	-0.00811961	Svg146	Unpaired	20	2.71357	Svg146	Unpaired	20	0.506387
Svg146	Unpaired	21	1.08257	Svg146	Unpaired	21	1.55143	Svg146	Unpaired	21	0.514845	Svg146	Unpaired	21	0.522033	Svg146	Unpaired	21	0.84994	Svg146	Unpaired	21	1.62771	Svg146	Unpaired	21	1.42703	Svg146	Unpaired	21	1.67173	Svg146	Unpaired	21	1.54456	Svg146	Unpaired	21	1.12323	Svg146	Unpaired	21	1.30145
Svg146	Unpaired	22	0.387086	Svg146	Unpaired	22	0.730987	Svg146	Unpaired	22	1.49238	Svg146	Unpaired	22	1.93452	Svg146	Unpaired	22	0.167038	Svg146	Unpaired	22	1.54501	Svg146	Unpaired	22	0.954487	Svg146	Unpaired	22	0.827557	Svg146	Unpaired	22	0.0673108	Svg146	Unpaired	22	0.571213	Svg146	Unpaired	22	1.17686
Svg146	Unpaired	23	0.545947	Svg146	Unpaired	23	1.34507	Svg146	Unpaired	23	0.589405	Svg146	Unpaired	23	0.775304	Svg146	Unpaired	23	1.54298	Svg146	Unpaired	23	1.51424	Svg146	Unpaired	23	2.13332	Svg146	Unpaired	23	1.34552	Svg146	Unpaired	23	0.763656	Svg146	Unpaired	23	0.591091	Svg146	Unpaired	23	1.35559
Svg146	Unpaired	24	-0.121846	Svg146	Unpaired	24	0.913821	Svg146	Unpaired	24	0.533694	Svg146	Unpaired	24	2.31202	Svg146	Unpaired	24	0.102246	Svg146	Unpaired	24	1.3354	Svg146	Unpaired	24	1.59261	Svg146	Unpaired	24	0.758175	Svg146	Unpaired	24	0.515134	Svg146	Unpaired	24	0.295681	Svg146	Unpaired	24	0.747892
Svg146	Unpaired	25	-1.24792	Svg146	Unpaired	25	1.65149	Svg146	Unpaired	25	0.458285	Svg146	Unpaired	25	1.04809	Svg146	Unpaired	25	2.21595	Svg146	Unpaired	25	2.35616	Svg146	Unpaired	25	1.24703	Svg146	Unpaired	25	1.02055	Svg146	Unpaired	25	0.865724	Svg146	Unpaired	25	1.84945	Svg146	Unpaired	25	0.143186
Svg146	Unpaired	26	0.63574	Svg146	Unpaired	26	0.596673	Svg146	Unpaired	26	1.52476	Svg146	Unpaired	26	2.08528	Svg146	Unpaired	26	1.06029	Svg146	Unpaired	26	0.847502	Svg146	Unpaired	26	0.95976	Svg146	Unpaired	26	0.546051	Svg146	Unpaired	26	0.691608	Svg146	Unpaired	26	1.21294	Svg146	Unpaired	26	0.825432
Svg146	Unpaired	27	0.674346	Svg146	Unpaired	27	0.538297	Svg146	Unpaired	27	-0.247095	Svg146	Unpaired	27	-0.0232213	Svg146	Unpaired	27	1.52358	Svg146	Unpaired	27	1.41965	Svg146	Unpaired	27	1.08181	Svg146	Unpaired	27	0.509558	Svg146	Unpaired	27	2.28089	Svg146	Unpaired	27	0.493348	Svg146	Unpaired	27	2.12978
Svg146	Unpaired	28	0.626165	Svg146	Unpaired	28	1.0629	Svg146	Unpaired	28	1.06181	Svg146	Unpaired	28	2.63064	Svg146	Unpaired	28	1.01865	Svg146	Unpaired	28	1.96182	Svg146	Unpaired	28	0.374149	Svg146	Unpaired	28	2.22109	Svg146	Unpaired	28	1.33131	Svg146	Unpaired	28	0.575339	Svg146	Unpaired	28	0.23074
Svg146	Unpaired	29	0.448209	Svg146	Unpaired	29	2.16041	Svg146	Unpaired	29	1.07444	Svg146	Unpaired	29	0.866362	Svg146	Unpaired	29	1.26072	Svg146	Unpaired	29	1.78847	Svg146	Unpaired	29	0.454397	Svg146	Unpaired	29	2.67585	Svg146	Unpaired	29	1.06199	Svg146	Unpaired	29	0.592428	Svg146	Unpaired	29	0.104956
Svg146	Unpaired	30	-0.12539	Svg146	Unpaired	30	-0.4899	Svg146	Unpaired	30	-0.214688	Svg146	Unpaired	30	-1.22248	Svg146	Unpaired	30	-0.479185	Svg146	Unpaired	30	-0.315476	Svg146	Unpaired	30	1.10527	Svg146	Unpaired	30	-0.890684	Svg146	Unpaired	30	-0.712024	Svg146	Unpaired	30	-0.52364	Svg146	Unpaired	30	-0.118471
Svg149	Unpaired	1	1.37635	Svg149	Unpaired	1	2.78337	Svg149	Unpaired	1	1.85252	Svg149	Unpaired	1	1.54896	Svg149	Unpaired	1	2.81709	Svg149	Unpaired	1	1.41281	Svg149	Unpaired	1	1.38214	Svg149	Unpaired	1	0.607475	Svg149	Unpaired	1	0.566132	Svg149	Unpaired	1	0.999554	Svg149	Unpaired	1	1.4692
Svg149	Unpaired	2	1.7421	Svg149	Unpaired	2	0.832314	Svg149	Unpaired	2	1.48459	Svg149	Unpaired	2	1.20491	Svg149	Unpaired	2	2.10471	Svg149	Unpaired	2	0.837306	Svg149	Unpaired	2	0.650906	Svg149	Unpaired	2	1.48695	Svg149	Unpaired	2	1.47855	Svg149	Unpaired	2	1.20794	Svg149	Unpaired	2	1.01844
Svg149	Unpaired	3	1.15971	Svg149	Unpaired	3	2.04935	Svg149	Unpaired	3	1.14088	Svg149	Unpaired	3	0.740787	Svg149	Unpaired	3	1.84836	Svg149	Unpaired	3	1.22166	Svg149	Unpaired	3	0.627001	Svg149	Unpaired	3	1.78717	Svg149	Unpaired	3	0.561747	Svg149	Unpaired	3	1.30179	Svg149	Unpaired	3	0.909189
Svg149	Unpaired	4	1.06514	Svg149	Unpaired	4	1.28459	Svg149	Unpaired	4	0.796642	Svg149	Unpaired	4	2.13209	Svg149	Unpaired	4	1.45084	Svg149	Unpaired	4	0.994742	Svg149	Unpaired	4	1.24581	Svg149	Unpaired	4	1.58216	Svg149	Unpaired	4	2.02677	Svg149	Unpaired	4	2.4144	Svg149	Unpaired	4	0.371305
Svg149	Unpaired	5	0.575524	Svg149	Unpaired	5	1.09533	Svg149	Unpaired	5	0.643622	Svg149	Unpaired	5	0.822174	Svg149	Unpaired	5	2.6918	Svg149	Unpaired	5	1.02147	Svg149	Unpaired	5	1.20446	Svg149	Unpaired	5	1.13489	Svg149	Unpaired	5	0.978706	Svg149	Unpaired	5	1.11471	Svg149	Unpaired	5	0.0398782
Svg149	Unpaired	6	1.00263	Svg149	Unpaired	6	1.90378	Svg149	Unpaired	6	0.816112	Svg149	Unpaired	6	2.07794	Svg149	Unpaired	6	0.0646512	Svg149	Unpaired	6	0.788576	Svg149	Unpaired	6	1.86634	Svg149	Unpaired	6	1.11962	Svg149	Unpaired	6	0.596627	Svg149	Unpaired	6	1.83886	Svg149	Unpaired	6	0.506823
Svg149	Unpaired	7	1.03145	Svg149	Unpaired	7	1.03517	Svg149	Unpaired	7	1.50954	Svg149	Unpaired	7	0.752992	Svg149	Unpaired	7	0.921066	Svg149	Unpaired	7	0.752745	Svg149	Unpaired	7	0.852518	Svg149	Unpaired	7	0.818113	Svg149	Unpaired	7	1.64219	Svg149	Unpaired	7	0.615322	Svg149	Unpaired	7	0.385779
Svg149	Unpaired	8	0.517882	Svg149	Unpaired	8	1.37049	Svg149	Unpaired	8	0.835927	Svg149	Unpaired	8	0.20666	Svg149	Unpaired	8	1.07151	Svg149	Unpaired	8	-0.0975751	Svg149	Unpaired	8	1.03792	Svg149	Unpaired	8	0.614148	Svg149	Unpaired	8	0.99782	Svg149	Unpaired	8	0.182665	Svg149	Unpaired	8	1.16098
Svg149	Unpaired	9	2.03434	Svg149	Unpaired	9	0.508394	Svg149	Unpaired	9	1.00263	Svg149	Unpaired	9	1.2229	Svg149	Unpaired	9	0.903173	Svg149	Unpaired	9	0.0538973	Svg149	Unpaired	9	0.75105	Svg149	Unpaired	9	1.02643	Svg149	Unpaired	9	1.69703	Svg149	Unpaired	9	0.615575	Svg149	Unpaired	9	0.345944
Svg149	Unpaired	10	1.60692	Svg149	Unpaired	10	2.73628	Svg149	Unpaired	10	1.58811	Svg149	Unpaired	10	1.09245	Svg149	Unpaired	10	0.878041	Svg149	Unpaired	10	0.498615	Svg149	Unpaired	10	0.559769	Svg149	Unpaired	10	1.01338	Svg149	Unpaired	10	1.23417	Svg149	Unpaired	10	0.852188	Svg149	Unpaired	10	0.769108
Svg149	Unpaired	11	0.74498	Svg149	Unpaired	11	0.408167	Svg149	Unpaired	11	0.973079	Svg149	Unpaired	11	1.22628	Svg149	Unpaired	11	1.03606	Svg149	Unpaired	11	0.638014	Svg149	Unpaired	11	0.323489	Svg149	Unpaired	11	1.78243	Svg149	Unpaired	11	1.33479	Svg149	Unpaired	11	1.3636	Svg149	Unpaired	11	0.523113
Svg149	Unpaired	12	0.43467	Svg149	Unpaired	12	2.57895	Svg149	Unpaired	12	2.01709	Svg149	Unpaired	12	1.80134	Svg149	Unpaired	12	0.595958	Svg149	Unpaired	12	0.648302	Svg149	Unpaired	12	0.743546	Svg149	Unpaired	12	1.53182	Svg149	Unpaired	12	0.552047	Svg149	Unpaired	12	0.841121	Svg149	Unpaired	12	1.18327
Svg149	Unpaired	13	1.79585	Svg149	Unpaired	13	0.497392	Svg149	Unpaired	13	0.414264	Svg149	Unpaired	13	1.46289	Svg149	Unpaired	13	1.71099	Svg149	Unpaired	13	0.529154	Svg149	Unpaired	13	0.263363	Svg149	Unpaired	13	1.22019	Svg149	Unpaired	13	1.05585	Svg149	Unpaired	13	0.971864	Svg149	Unpaired	13	0.655571
Svg149	Unpaired	14	0.523906	Svg149	Unpaired	14	0.339782	Svg149	Unpaired	14	1.25947	Svg149	Unpaired	14	1.54068	Svg149	Unpaired	14	1.60672	Svg149	Unpaired	14	0.927686	Svg149	Unpaired	14	2.52613	Svg149	Unpaired	14	0.890568	Svg149	Unpaired	14	2.03538	Svg149	Unpaired	14	0.730151	Svg149	Unpaired	14	1.83724
Svg149	Unpaired	15	1.39896	Svg149	Unpaired	15	0.63022	Svg149	Unpaired	15	1.61786	Svg149	Unpaired	15	1.25023	Svg149	Unpaired	15	1.3169	Svg149	Unpaired	15	0.495687	Svg149	Unpaired	15	0.661379	Svg149	Unpaired	15	1.19073	Svg149	Unpaired	15	0.902633	Svg149	Unpaired	15	1.16305	Svg149	Unpaired	15	1.22566
Svg149	Unpaired	16	0.333361	Svg149	Unpaired	16	1.6935	Svg149	Unpaired	16	0.946131	Svg149	Unpaired	16	0.234618	Svg149	Unpaired	16	0.610355	Svg149	Unpaired	16	0.286776	Svg149	Unpaired	16	0.925595	Svg149	Unpaired	16	1.09554	Svg149	Unpaired	16	0.434858	Svg149	Unpaired	16	1.0242	Svg149	Unpaired	16	1.19168
Svg149	Unpaired	17	0.850049	Svg149	Unpaired	17	0.539011	Svg149	Unpaired	17	1.91813	Svg149	Unpaired	17	1.48668	Svg149	Unpaired	17	1.1342	Svg149	Unpaired	17	1.69617	Svg149	Unpaired	17	1.31945	Svg149	Unpaired	17	0.937765	Svg149	Unpaired	17	0.248948	Svg149	Unpaired	17	0.875558	Svg149	Unpaired	17	0.990588
Svg149	Unpaired	18	1.28437	Svg149	Unpaired	18	0.611304	Svg149	Unpaired	18	1.19473	Svg149	Unpaired	18	1.10581	Svg149	Unpaired	18	0.857998	Svg149	Unpaired	18	1.70017	Svg149	Unpaired	18	1.33471	Svg149	Unpaired	18	1.29521	Svg149	Unpaired	18	0.368954	Svg149	Unpaired	18	0.912138	Svg149	Unpaired	18	0.855617
Svg149	Unpaired	19	1.02678	Svg149	Unpaired	19	2.10445	Svg149	Unpaired	19	0.575078	Svg149	Unpaired	19	1.37125	Svg149	Unpaired	19	0.452062	Svg149	Unpaired	19	1.21158	Svg149	Unpaired	19	0.55255	Svg149	Unpaired	19	1.0382	Svg149	Unpaired	19	0.232666	Svg149	Unpaired	19	1.47288	Svg149	Unpaired	19	1.37973
Svg149	Unpaired	20	0.437692	Svg149	Unpaired	20	1.23655	Svg149	Unpaired	20	0.553153	Svg149	Unpaired	20	2.05399	Svg149	Unpaired	20	1.86768	Svg149	Unpaired	20	2.22279	Svg149	Unpaired	20	0.654176	Svg149	Unpaired	20	0.492026	Svg149	Unpaired	20	0.672014	Svg149	Unpaired	20	0.944035	Svg149	Unpaired	20	0.975478
Svg149	Unpaired	21	2.14317	Svg149	Unpaired	21	1.05837	Svg149	Unpaired	21	1.37822	Svg149	Unpaired	21	0.600971	Svg149	Unpaired	21	0.380482	Svg149	Unpaired	21	0.137963	Svg149	Unpaired	21	0.959265	Svg149	Unpaired	21	2.13569	Svg149	Unpaired	21	0.43448	Svg149	Unpaired	21	1.67062	Svg149	Unpaired	21	1.13369
Svg149	Unpaired	22	1.86295	Svg149	Unpaired	22	0.710787	Svg149	Unpaired	22	0.483162	Svg149	Unpaired	22	1.52037	Svg149	Unpaired	22	1.33786	Svg149	Unpaired	22	0.395244	Svg149	Unpaired	22	0.631992	Svg149	Unpaired	22	0.162022	Svg149	Unpaired	22	0.00704602	Svg149	Unpaired	22	1.26395	Svg149	Unpaired	22	0.495237
Svg149	Unpaired	23	0.438475	Svg149	Unpaired	23	0.758244	Svg149	Unpaired	23	1.32059	Svg149	Unpaired	23	0.578429	Svg149	Unpaired	23	1.68968	Svg149	Unpaired	23	1.10903	Svg149	Unpaired	23	0.579126	Svg149	Unpaired	23	0.41816	Svg149	Unpaired	23	1.28317	Svg149	Unpaired	23	1.35624	Svg149	Unpaired	23	0.416196
Svg149	Unpaired	24	0.46495	Svg149	Unpaired	24	0.640179	Svg149	Unpaired	24	0.253289	Svg149	Unpaired	24	0.723232	Svg149	Unpaired	24	1.16134	Svg149	Unpaired	24	1.7136	Svg149	Unpaired	24	1.57152	Svg149	Unpaired	24	0.664024	Svg149	Unpaired	24	0.288862	Svg149	Unpaired	24	1.35793	Svg149	Unpaired	24	1.02887
Svg149	Unpaired	25	1.29722	Svg149	Unpaired	25	0.64187	Svg149	Unpaired	25	1.41395	Svg149	Unpaired	25	0.82227	Svg149	Unpaired	25	1.22029	Svg149	Unpaired	25	0.651033	Svg149	Unpaired	25	1.0972	Svg149	Unpaired	25	2.4066	Svg149	Unpaired	25	0.703698	Svg149	Unpaired	25	0.588968	Svg149	Unpaired	25	1.52811
Svg149	Unpaired	26	-0.0244147	Svg149	Unpaired	26	1.67986	Svg149	Unpaired	26	0.479115	Svg149	Unpaired	26	0.911847	Svg149	Unpaired	26	2.12986	Svg149	Unpaired	26	0.851121	Svg149	Unpaired	26	0.734673	Svg149	Unpaired	26	0.715132	Svg149	Unpaired	26	0.843481	Svg149	Unpaired	26	1.75741	Svg149	Unpaired	26	1.20407
Svg149	Unpaired	27	0.692114	Svg149	Unpaired	27	0.353349	Svg149	Unpaired	27	1.06197	Svg149	Unpaired	27	-0.0474523	Svg149	Unpaired	27	1.3786	Svg149	Unpaired	27	0.540387	Svg149	Unpaired	27	0.562195	Svg149	Unpaired	27	1.60527	Svg149	Unpaired	27	0.672155	Svg149	Unpaired	27	0.561235	Svg149	Unpaired	27	1.04125
Svg149	Unpaired	28	0.391706	Svg149	Unpaired	28	0.359285	Svg149	Unpaired	28	0.498039	Svg149	Unpaired	28	0.8241	Svg149	Unpaired	28	1.70194	Svg149	Unpaired	28	1.04221	Svg149	Unpaired	28	2.13181	Svg149	Unpaired	28	0.906844	Svg149	Unpaired	28	0.126922	Svg149	Unpaired	28	0.550877	Svg149	Unpaired	28	-0.396027
Svg149	Unpaired	29	1.4245	Svg149	Unpaired	29	1.82272	Svg149	Unpaired	29	0.658892	Svg149	Unpaired	29	2.27871	Svg149	Unpaired	29	2.5854	Svg149	Unpaired	29	0.197836	Svg149	Unpaired	29	0.920833	Svg149	Unpaired	29	0.875306	Svg149	Unpaired	29	1.6644	Svg149	Unpaired	29	1.87097	Svg149	Unpaired	29	-0.150359
Svg149	Unpaired	30	0.626727	Svg149	Unpaired	30	-0.355109	Svg149	Unpaired	30	0.00167988	Svg149	Unpaired	30	0.266273	Svg149	Unpaired	30	-0.005114	Svg149	Unpaired	30	-0.134279	Svg149	Unpaired	30	0.731968	Svg149	Unpaired	30	0.703673	Svg149	Unpaired	30	0.748681	Svg149	Unpaired	30	0.784854	Svg149	Unpaired	30	1.73507
Svg150	Unpaired	1	-0.200964	Svg150	Unpaired	1	-1.02225	Svg150	Unpaired	1	-1.24524	Svg150	Unpaired	1	-0.676627	Svg150	Unpaired	1	0.471227	Svg150	Unpaired	1	-0.0325328	Svg150	Unpaired	1	-0.688455	Svg150	Unpaired	1	0.115397	Svg150	Unpaired	1	0.477854	Svg150	Unpaired	1	0.2164	Svg150	Unpaired	1	0.523203
Svg150	Unpaired	2	-0.243548	Svg150	Unpaired	2	-0.339026	Svg150	Unpaired	2	-0.483968	Svg150	Unpaired	2	1.25313	Svg150	Unpaired	2	-0.576212	Svg150	Unpaired	2	0.149204	Svg150	Unpaired	2	0.0846545	Svg150	Unpaired	2	0.819306	Svg150	Unpaired	2	-0.386333	Svg150	Unpaired	2	-0.296736	Svg150	Unpaired	2	0.25142
Svg150	Unpaired	3	-0.236751	Svg150	Unpaired	3	-0.197007	Svg150	Unpaired	3	0.192276	Svg150	Unpaired	3	0.202625	Svg150	Unpaired	3	0.0434358	Svg150	Unpaired	3	0.274458	Svg150	Unpaired	3	0.110603	Svg150	Unpaired	3	1.21748	Svg150	Unpaired	3	-0.389686	Svg150	Unpaired	3	0.606796	Svg150	Unpaired	3	0.403859
Svg150	Unpaired	4	0.764582	Svg150	Unpaired	4	0.720597	Svg150	Unpaired	4	-0.918124	Svg150	Unpaired	4	-0.883559	Svg150	Unpaired	4	0.459506	Svg150	Unpaired	4	-0.16108	Svg150	Unpaired	4	-0.195104	Svg150	Unpaired	4	3.07782	Svg150	Unpaired	4	1.34696	Svg150	Unpaired	4	0.349459	Svg150	Unpaired	4	2.45907
Svg150	Unpaired	5	-0.583572	Svg150	Unpaired	5	-0.723375	Svg150	Unpaired	5	0.262265	Svg150	Unpaired	5	1.00967	Svg150	Unpaired	5	1.11882	Svg150	Unpaired	5	-0.0460134	Svg150	Unpaired	5	1.03407	Svg150	Unpaired	5	0.436164	Svg150	Unpaired	5	-0.00537145	Svg150	Unpaired	5	-0.739844	Svg150	Unpaired	5	0.408901
Svg150	Unpaired	6	-0.216591	Svg150	Unpaired	6	-0.710497	Svg150	Unpaired	6	1.03764	Svg150	Unpaired	6	-0.0245683	Svg150	Unpaired	6	-0.51409	Svg150	Unpaired	6	-0.333538	Svg150	Unpaired	6	-0.27274	Svg150	Unpaired	6	0.0446817	Svg150	Unpaired	6	0.423308	Svg150	Unpaired	6	0.839786	Svg150	Unpaired	6	-0.467178
Svg150	Unpaired	7	0.150219	Svg150	Unpaired	7	-0.152442	Svg150	Unpaired	7	-0.260672	Svg150	Unpaired	7	-0.263758	Svg150	Unpaired	7	0.139826	Svg150	Unpaired	7	1.54309	Svg150	Unpaired	7	-0.383212	Svg150	Unpaired	7	-0.276296	Svg150	Unpaired	7	-0.106937	Svg150	Unpaired	7	0.507449	Svg150	Unpaired	7	0.260789
Svg150	Unpaired	8	-0.0567965	Svg150	Unpaired	8	-0.391717	Svg150	Unpaired	8	-0.206996	Svg150	Unpaired	8	0.0363271	Svg150	Unpaired	8	-0.603718	Svg150	Unpaired	8	0.628911	Svg150	Unpaired	8	0.346493	Svg150	Unpaired	8	0.188621	Svg150	Unpaired	8	-0.242808	Svg150	Unpaired	8	-0.0400182	Svg150	Unpaired	8	-0.0721106
Svg150	Unpaired	9	0.656918	Svg150	Unpaired	9	0.37806	Svg150	Unpaired	9	-0.0849873	Svg150	Unpaired	9	-0.488641	Svg150	Unpaired	9	-0.547115	Svg150	Unpaired	9	0.0874845	Svg150	Unpaired	9	0.193046	Svg150	Unpaired	9	-0.270174	Svg150	Unpaired	9	0.854788	Svg150	Unpaired	9	1.52287	Svg150	Unpaired	9	-0.0618646
Svg150	Unpaired	10	-0.198575	Svg150	Unpaired	10	-0.544518	Svg150	Unpaired	10	0.462292	Svg150	Unpaired	10	-0.231095	Svg150	Unpaired	10	-0.105821	Svg150	Unpaired	10	1.43776	Svg150	Unpaired	10	-0.0902488	Svg150	Unpaired	10	0.209418	Svg150	Unpaired	10	0.59167	Svg150	Unpaired	10	-0.177896	Svg150	Unpaired	10	0.184588
Svg150	Unpaired	11	-0.765227	Svg150	Unpaired	11	0.370395	Svg150	Unpaired	11	0.210231	Svg150	Unpaired	11	0.570575	Svg150	Unpaired	11	0.0364682	Svg150	Unpaired	11	-0.776218	Svg150	Unpaired	11	0.442515	Svg150	Unpaired	11	0.181219	Svg150	Unpaired	11	1.79974	Svg150	Unpaired	11	1.46073	Svg150	Unpaired	11	-0.330641
Svg150	Unpaired	12	0.639069	Svg150	Unpaired	12	-0.286512	Svg150	Unpaired	12	-0.139915	Svg150	Unpaired	12	-1.00404	Svg150	Unpaired	12	0.155972	Svg150	Unpaired	12	-0.701916	Svg150	Unpaired	12	0.157153	Svg150	Unpaired	12	-0.268308	Svg150	Unpaired	12	0.982358	Svg150	Unpaired	12	0.0336447	Svg150	Unpaired	12	-0.0136491
Svg150	Unpaired	13	0.114795	Svg150	Unpaired	13	-0.233015	Svg150	Unpaired	13	-0.271487	Svg150	Unpaired	13	0.482106	Svg150	Unpaired	13	0.210667	Svg150	Unpaired	13	0.0728999	Svg150	Unpaired	13	0.41085	Svg150	Unpaired	13	-0.365124	Svg150	Unpaired	13	0.537892	Svg150	Unpaired	13	0.687796	Svg150	Unpaired	13	0.787558
Svg150	Unpaired	14	-0.613016	Svg150	Unpaired	14	0.541244	Svg150	Unpaired	14	0.163662	Svg150	Unpaired	14	0.317403	Svg150	Unpaired	14	-0.237685	Svg150	Unpaired	14	1.18664	Svg150	Unpaired	14	1.11291	Svg150	Unpaired	14	0.486481	Svg150	Unpaired	14	0.071411	Svg150	Unpaired	14	0.487493	Svg150	Unpaired	14	0.0984534
Svg150	Unpaired	15	0.47404	Svg150	Unpaired	15	-0.512846	Svg150	Unpaired	15	0.171164	Svg150	Unpaired	15	0.946236	Svg150	Unpaired	15	1.59017	Svg150	Unpaired	15	-0.313112	Svg150	Unpaired	15	-0.469252	Svg150	Unpaired	15	0.282575	Svg150	Unpaired	15	2.34516	Svg150	Unpaired	15	0.317461	Svg150	Unpaired	15	0.1978
Svg150	Unpaired	16	-0.167784	Svg150	Unpaired	16	-0.046936	Svg150	Unpaired	16	-0.0986882	Svg150	Unpaired	16	-0.375442	Svg150	Unpaired	16	0.401141	Svg150	Unpaired	16	-0.0381508	Svg150	Unpaired	16	0.624904	Svg150	Unpaired	16	0.677925	Svg150	Unpaired	16	0.537781	Svg150	Unpaired	16	0.0525928	Svg150	Unpaired	16	0.409466
Svg150	Unpaired	17	0.239592	Svg150	Unpaired	17	0.128752	Svg150	Unpaired	17	1.4896	Svg150	Unpaired	17	0.209445	Svg150	Unpaired	17	0.00848352	Svg150	Unpaired	17	-0.228718	Svg150	Unpaired	17	-0.306241	Svg150	Unpaired	17	-0.194725	Svg150	Unpaired	17	0.112535	Svg150	Unpaired	17	0.430771	Svg150	Unpaired	17	0.819175
Svg150	Unpaired	18	-0.422977	Svg150	Unpaired	18	-0.133968	Svg150	Unpaired	18	0.0206498	Svg150	Unpaired	18	0.396635	Svg150	Unpaired	18	0.857311	Svg150	Unpaired	18	0.000922069	Svg150	Unpaired	18	0.227353	Svg150	Unpaired	18	0.556557	Svg150	Unpaired	18	0.62937	Svg150	Unpaired	18	1.23389	Svg150	Unpaired	18	0.254239
Svg150	Unpaired	19	-0.140991	Svg150	Unpaired	19	-0.295277	Svg150	Unpaired	19	-0.222104	Svg150	Unpaired	19	0.872655	Svg150	Unpaired	19	-0.139263	Svg150	Unpaired	19	-0.0826555	Svg150	Unpaired	19	-0.0801437	Svg150	Unpaired	19	0.00856472	Svg150	Unpaired	19	0.358394	Svg150	Unpaired	19	0.355402	Svg150	Unpaired	19	2.35394
Svg150	Unpaired	20	-0.14933	Svg150	Unpaired	20	0.611543	Svg150	Unpaired	20	-0.117562	Svg150	Unpaired	20	-0.384388	Svg150	Unpaired	20	0.321219	Svg150	Unpaired	20	0.310747	Svg150	Unpaired	20	-0.186106	Svg150	Unpaired	20	0.534845	Svg150	Unpaired	20	0.10748	Svg150	Unpaired	20	-0.275356	Svg150	Unpaired	20	0.0775715
Svg150	Unpaired	21	0.048708	Svg150	Unpaired	21	0.572176	Svg150	Unpaired	21	-0.465024	Svg150	Unpaired	21	-0.0964811	Svg150	Unpaired	21	0.264273	Svg150	Unpaired	21	1.92491	Svg150	Unpaired	21	-0.203905	Svg150	Unpaired	21	0.293003	Svg150	Unpaired	21	0.873899	Svg150	Unpaired	21	0.44642	Svg150	Unpaired	21	1.363
Svg150	Unpaired	22	-0.00656763	Svg150	Unpaired	22	0.791017	Svg150	Unpaired	22	-0.454371	Svg150	Unpaired	22	1.04581	Svg150	Unpaired	22	-0.0432396	Svg150	Unpaired	22	-0.529867	Svg150	Unpaired	22	2.43974	Svg150	Unpaired	22	0.142716	Svg150	Unpaired	22	0.220712	Svg150	Unpaired	22	1.08657	Svg150	Unpaired	22	0.464612
Svg150	Unpaired	23	0.255066	Svg150	Unpaired	23	-0.19765	Svg150	Unpaired	23	-0.454101	Svg150	Unpaired	23	-0.303223	Svg150	Unpaired	23	0.799318	Svg150	Unpaired	23	0.907922	Svg150	Unpaired	23	0.200616	Svg150	Unpaired	23	1.09002	Svg150	Unpaired	23	0.372661	Svg150	Unpaired	23	-0.184823	Svg150	Unpaired	23	0.638206
Svg150	Unpaired	24	-0.142185	Svg150	Unpaired	24	0.0773291	Svg150	Unpaired	24	0.230557	Svg150	Unpaired	24	-0.195135	Svg150	Unpaired	24	-0.0166289	Svg150	Unpaired	24	-0.14321	Svg150	Unpaired	24	-0.235837	Svg150	Unpaired	24	0.683612	Svg150	Unpaired	24	0.206769	Svg150	Unpaired	24	0.104952	Svg150	Unpaired	24	-0.0966122
Svg150	Unpaired	25	0.131935	Svg150	Unpaired	25	-0.349956	Svg150	Unpaired	25	0.246153	Svg150	Unpaired	25	0.163657	Svg150	Unpaired	25	-0.251968	Svg150	Unpaired	25	-0.329415	Svg150	Unpaired	25	-0.700434	Svg150	Unpaired	25	-0.12049	Svg150	Unpaired	25	-0.220742	Svg150	Unpaired	25	-0.20262	Svg150	Unpaired	25	0.37378
Svg150	Unpaired	26	0.591485	Svg150	Unpaired	26	0.910332	Svg150	Unpaired	26	0.559863	Svg150	Unpaired	26	0.08486	Svg150	Unpaired	26	0.676117	Svg150	Unpaired	26	-0.0830289	Svg150	Unpaired	26	-0.187771	Svg150	Unpaired	26	0.518739	Svg150	Unpaired	26	0.587906	Svg150	Unpaired	26	0.18201	Svg150	Unpaired	26	0.806678
Svg150	Unpaired	27	0.122462	Svg150	Unpaired	27	-0.573906	Svg150	Unpaired	27	-0.66955	Svg150	Unpaired	27	-0.438979	Svg150	Unpaired	27	0.370411	Svg150	Unpaired	27	-0.047933	Svg150	Unpaired	27	-0.838992	Svg150	Unpaired	27	1.13453	Svg150	Unpaired	27	1.13298	Svg150	Unpaired	27	1.16892	Svg150	Unpaired	27	0.511635
Svg150	Unpaired	28	0.158759	Svg150	Unpaired	28	0.418693	Svg150	Unpaired	28	0.691112	Svg150	Unpaired	28	0.130751	Svg150	Unpaired	28	0.169802	Svg150	Unpaired	28	-0.0592759	Svg150	Unpaired	28	0.0534168	Svg150	Unpaired	28	0.294163	Svg150	Unpaired	28	-0.183974	Svg150	Unpaired	28	0.598056	Svg150	Unpaired	28	0.997934
Svg150	Unpaired	29	-0.133787	Svg150	Unpaired	29	-0.0724189	Svg150	Unpaired	29	0.0111285	Svg150	Unpaired	29	0.728203	Svg150	Unpaired	29	0.996351	Svg150	Unpaired	29	0.745129	Svg150	Unpaired	29	0.0560395	Svg150	Unpaired	29	0.128396	Svg150	Unpaired	29	0.30351	Svg150	Unpaired	29	1.21681	Svg150	Unpaired	29	-0.164821
Svg150	Unpaired	30	-1.01217	Svg150	Unpaired	30	-1.55693	Svg150	Unpaired	30	-1.18076	Svg150	Unpaired	30	-0.817864	Svg150	Unpaired	30	-0.181459	Svg150	Unpaired	30	-0.485295	Svg150	Unpaired	30	-0.535022	Svg150	Unpaired	30	-0.293793	Svg150	Unpaired	30	0.586211	Svg150	Unpaired	30	-1.71468	Svg150	Unpaired	30	-0.461541
Svg152	Unpaired	1	0.00847986	Svg152	Unpaired	1	0.609536	Svg152	Unpaired	1	0.193757	Svg152	Unpaired	1	0.570134	Svg152	Unpaired	1	0.208655	Svg152	Unpaired	1	0.623037	Svg152	Unpaired	1	0.0743707	Svg152	Unpaired	1	0.959397	Svg152	Unpaired	1	0.68158	Svg152	Unpaired	1	0.810749	Svg152	Unpaired	1	0.781438
Svg152	Unpaired	2	0.388892	Svg152	Unpaired	2	0.900931	Svg152	Unpaired	2	0.82399	Svg152	Unpaired	2	0.610391	Svg152	Unpaired	2	-0.0828332	Svg152	Unpaired	2	0.0764892	Svg152	Unpaired	2	1.06123	Svg152	Unpaired	2	2.08729	Svg152	Unpaired	2	1.11854	Svg152	Unpaired	2	1.03494	Svg152	Unpaired	2	0.217583
Svg152	Unpaired	3	0.559767	Svg152	Unpaired	3	-0.165966	Svg152	Unpaired	3	-0.0767475	Svg152	Unpaired	3	0.563277	Svg152	Unpaired	3	0.375355	Svg152	Unpaired	3	0.176603	Svg152	Unpaired	3	-0.0660883	Svg152	Unpaired	3	1.49954	Svg152	Unpaired	3	1.22185	Svg152	Unpaired	3	1.08949	Svg152	Unpaired	3	0.965912
Svg152	Unpaired	4	-0.0548613	Svg152	Unpaired	4	1.07976	Svg152	Unpaired	4	1.27662	Svg152	Unpaired	4	-0.160337	Svg152	Unpaired	4	0.904381	Svg152	Unpaired	4	1.1921	Svg152	Unpaired	4	1.83888	Svg152	Unpaired	4	0.716549	Svg152	Unpaired	4	0.0580726	Svg152	Unpaired	4	0.123822	Svg152	Unpaired	4	0.0388641
Svg152	Unpaired	5	0.21777	Svg152	Unpaired	5	0.0611896	Svg152	Unpaired	5	0.418413	Svg152	Unpaired	5	0.0602993	Svg152	Unpaired	5	0.280184	Svg152	Unpaired	5	0.433816	Svg152	Unpaired	5	0.355707	Svg152	Unpaired	5	0.754751	Svg152	Unpaired	5	0.679397	Svg152	Unpaired	5	0.715286	Svg152	Unpaired	5	0.33952
Svg152	Unpaired	6	0.121733	Svg152	Unpaired	6	-0.393667	Svg152	Unpaired	6	0.552885	Svg152	Unpaired	6	0.81289	Svg152	Unpaired	6	0.210646	Svg152	Unpaired	6	1.04756	Svg152	Unpaired	6	1.59072	Svg152	Unpaired	6	0.821731	Svg152	Unpaired	6	0.559413	Svg152	Unpaired	6	0.812332	Svg152	Unpaired	6	0.457361
Svg152	Unpaired	7	0.716871	Svg152	Unpaired	7	0.261745	Svg152	Unpaired	7	1.40497	Svg152	Unpaired	7	0.859374	Svg152	Unpaired	7	0.0831669	Svg152	Unpaired	7	0.516144	Svg152	Unpaired	7	0.473499	Svg152	Unpaired	7	0.618646	Svg152	Unpaired	7	0.822619	Svg152	Unpaired	7	1.76645	Svg152	Unpaired	7	0.6137
Svg152	Unpaired	8	-0.167507	Svg152	Unpaired	8	0.145684	Svg152	Unpaired	8	0.279938	Svg152	Unpaired	8	0.568114	Svg152	Unpaired	8	0.411753	Svg152	Unpaired	8	0.792016	Svg152	Unpaired	8	0.920025	Svg152	Unpaired	8	0.338568	Svg152	Unpaired	8	0.427354	Svg152	Unpaired	8	0.771992	Svg152	Unpaired	8	0.647106
Svg152	Unpaired	9	1.79482	Svg152	Unpaired	9	0.897191	Svg152	Unpaired	9	0.308658	Svg152	Unpaired	9	0.228687	Svg152	Unpaired	9	0.970604	Svg152	Unpaired	9	1.51649	Svg152	Unpaired	9	1.34532	Svg152	Unpaired	9	1.87234	Svg152	Unpaired	9	1.66847	Svg152	Unpaired	9	0.240577	Svg152	Unpaired	9	0.545511
Svg152	Unpaired	10	0.36351	Svg152	Unpaired	10	1.01906	Svg152	Unpaired	10	0.0621379	Svg152	Unpaired	10	0.698932	Svg152	Unpaired	10	0.380381	Svg152	Unpaired	10	1.12962	Svg152	Unpaired	10	0.726223	Svg152	Unpaired	10	0.643313	Svg152	Unpaired	10	0.741075	Svg152	Unpaired	10	0.225062	Svg152	Unpaired	10	-0.241889
Svg152	Unpaired	11	0.376053	Svg152	Unpaired	11	0.421091	Svg152	Unpaired	11	0.471005	Svg152	Unpaired	11	0.358533	Svg152	Unpaired	11	1.0027	Svg152	Unpaired	11	1.04911	Svg152	Unpaired	11	1.34166	Svg152	Unpaired	11	0.475826	Svg152	Unpaired	11	1.44999	Svg152	Unpaired	11	0.317201	Svg152	Unpaired	11	0.849225
Svg152	Unpaired	12	0.684932	Svg152	Unpaired	12	-0.302402	Svg152	Unpaired	12	0.739644	Svg152	Unpaired	12	0.925895	Svg152	Unpaired	12	0.877607	Svg152	Unpaired	12	1.51636	Svg152	Unpaired	12	1.30083	Svg152	Unpaired	12	0.827809	Svg152	Unpaired	12	0.562225	Svg152	Unpaired	12	0.285744	Svg152	Unpaired	12	0.905925
Svg152	Unpaired	13	0.468154	Svg152	Unpaired	13	-0.0160614	Svg152	Unpaired	13	0.742047	Svg152	Unpaired	13	0.36379	Svg152	Unpaired	13	1.0372	Svg152	Unpaired	13	0.949473	Svg152	Unpaired	13	1.56234	Svg152	Unpaired	13	0.786826	Svg152	Unpaired	13	1.11536	Svg152	Unpaired	13	0.517229	Svg152	Unpaired	13	0.874207
Svg152	Unpaired	14	-0.159949	Svg152	Unpaired	14	0.380457	Svg152	Unpaired	14	-0.0472875	Svg152	Unpaired	14	0.770337	Svg152	Unpaired	14	0.332064	Svg152	Unpaired	14	0.475318	Svg152	Unpaired	14	0.569186	Svg152	Unpaired	14	1.60608	Svg152	Unpaired	14	0.731056	Svg152	Unpaired	14	1.07007	Svg152	Unpaired	14	0.347887
Svg152	Unpaired	15	0.357908	Svg152	Unpaired	15	0.542658	Svg152	Unpaired	15	0.982353	Svg152	Unpaired	15	1.36283	Svg152	Unpaired	15	0.329814	Svg152	Unpaired	15	1.53118	Svg152	Unpaired	15	0.471315	Svg152	Unpaired	15	1.0034	Svg152	Unpaired	15	0.766569	Svg152	Unpaired	15	0.513839	Svg152	Unpaired	15	0.462419
Svg152	Unpaired	16	0.533894	Svg152	Unpaired	16	0.236199	Svg152	Unpaired	16	0.672014	Svg152	Unpaired	16	0.584156	Svg152	Unpaired	16	0.603112	Svg152	Unpaired	16	1.53353	Svg152	Unpaired	16	0.745398	Svg152	Unpaired	16	0.749041	Svg152	Unpaired	16	0.889646	Svg152	Unpaired	16	0.541205	Svg152	Unpaired	16	0.0225243
Svg152	Unpaired	17	0.196	Svg152	Unpaired	17	0.891455	Svg152	Unpaired	17	0.655082	Svg152	Unpaired	17	1.01631	Svg152	Unpaired	17	0.197123	Svg152	Unpaired	17	1.76869	Svg152	Unpaired	17	0.935186	Svg152	Unpaired	17	0.592501	Svg152	Unpaired	17	0.767569	Svg152	Unpaired	17	0.205601	Svg152	Unpaired	17	0.255925
Svg152	Unpaired	18	-0.129232	Svg152	Unpaired	18	-0.052269	Svg152	Unpaired	18	0.894827	Svg152	Unpaired	18	0.469041	Svg152	Unpaired	18	0.63114	Svg152	Unpaired	18	0.298573	Svg152	Unpaired	18	0.589682	Svg152	Unpaired	18	0.57709	Svg152	Unpaired	18	0.470546	Svg152	Unpaired	18	0.368324	Svg152	Unpaired	18	0.15167
Svg152	Unpaired	19	0.871138	Svg152	Unpaired	19	1.13445	Svg152	Unpaired	19	1.58908	Svg152	Unpaired	19	0.828446	Svg152	Unpaired	19	1.42127	Svg152	Unpaired	19	1.20401	Svg152	Unpaired	19	0.7472	Svg152	Unpaired	19	0.854016	Svg152	Unpaired	19	0.393684	Svg152	Unpaired	19	0.402374	Svg152	Unpaired	19	0.778144
Svg152	Unpaired	20	0.69332	Svg152	Unpaired	20	0.997443	Svg152	Unpaired	20	0.716982	Svg152	Unpaired	20	0.424284	Svg152	Unpaired	20	0.469686	Svg152	Unpaired	20	0.586693	Svg152	Unpaired	20	0.671515	Svg152	Unpaired	20	1.05143	Svg152	Unpaired	20	0.562028	Svg152	Unpaired	20	0.463723	Svg152	Unpaired	20	0.350498
Svg152	Unpaired	21	1.3486	Svg152	Unpaired	21	-0.0176831	Svg152	Unpaired	21	1.13003	Svg152	Unpaired	21	1.03794	Svg152	Unpaired	21	0.704479	Svg152	Unpaired	21	0.852149	Svg152	Unpaired	21	0.328993	Svg152	Unpaired	21	0.560821	Svg152	Unpaired	21	0.831512	Svg152	Unpaired	21	0.882086	Svg152	Unpaired	21	0.540362
Svg152	Unpaired	22	-0.381171	Svg152	Unpaired	22	0.662926	Svg152	Unpaired	22	0.614124	Svg152	Unpaired	22	0.473397	Svg152	Unpaired	22	1.12085	Svg152	Unpaired	22	0.709691	Svg152	Unpaired	22	0.200778	Svg152	Unpaired	22	0.993948	Svg152	Unpaired	22	0.231396	Svg152	Unpaired	22	0.570103	Svg152	Unpaired	22	0.977832
Svg152	Unpaired	23	0.333305	Svg152	Unpaired	23	0.298661	Svg152	Unpaired	23	1.13112	Svg152	Unpaired	23	0.638157	Svg152	Unpaired	23	0.107827	Svg152	Unpaired	23	0.771748	Svg152	Unpaired	23	1.08189	Svg152	Unpaired	23	0.470384	Svg152	Unpaired	23	0.35936	Svg152	Unpaired	23	0.17125	Svg152	Unpaired	23	0.280793
Svg152	Unpaired	24	0.370421	Svg152	Unpaired	24	0.0235112	Svg152	Unpaired	24	1.01585	Svg152	Unpaired	24	0.395098	Svg152	Unpaired	24	0.36423	Svg152	Unpaired	24	0.197115	Svg152	Unpaired	24	0.619413	Svg152	Unpaired	24	0.816548	Svg152	Unpaired	24	0.558895	Svg152	Unpaired	24	0.609617	Svg152	Unpaired	24	0.229118
Svg152	Unpaired	25	0.0673762	Svg152	Unpaired	25	0.0820611	Svg152	Unpaired	25	0.00965354	Svg152	Unpaired	25	0.454774	Svg152	Unpaired	25	0.693809	Svg152	Unpaired	25	0.751834	Svg152	Unpaired	25	0.850157	Svg152	Unpaired	25	0.397723	Svg152	Unpaired	25	0.82504	Svg152	Unpaired	25	-0.039397	Svg152	Unpaired	25	0.224889
Svg152	Unpaired	26	0.0142857	Svg152	Unpaired	26	-0.141886	Svg152	Unpaired	26	0.744825	Svg152	Unpaired	26	1.58038	Svg152	Unpaired	26	0.75415	Svg152	Unpaired	26	0.173183	Svg152	Unpaired	26	0.698008	Svg152	Unpaired	26	0.787618	Svg152	Unpaired	26	0.484937	Svg152	Unpaired	26	0.131329	Svg152	Unpaired	26	0.755206
Svg152	Unpaired	27	0.809343	Svg152	Unpaired	27	0.176584	Svg152	Unpaired	27	-0.130096	Svg152	Unpaired	27	0.553388	Svg152	Unpaired	27	-0.209155	Svg152	Unpaired	27	2.17879	Svg152	Unpaired	27	1.14128	Svg152	Unpaired	27	0.674478	Svg152	Unpaired	27	2.23588	Svg152	Unpaired	27	0.107389	Svg152	Unpaired	27	0.198292
Svg152	Unpaired	28	-0.26226	Svg152	Unpaired	28	0.95301	Svg152	Unpaired	28	1.22665	Svg152	Unpaired	28	0.317919	Svg152	Unpaired	28	0.921014	Svg152	Unpaired	28	0.714258	Svg152	Unpaired	28	0.701711	Svg152	Unpaired	28	1.85416	Svg152	Unpaired	28	0.0304483	Svg152	Unpaired	28	0.0754301	Svg152	Unpaired	28	0.969176
Svg152	Unpaired	29	-0.176953	Svg152	Unpaired	29	1.23775	Svg152	Unpaired	29	1.13009	Svg152	Unpaired	29	1.64925	Svg152	Unpaired	29	0.557683	Svg152	Unpaired	29	1.04576	Svg152	Unpaired	29	0.456083	Svg152	Unpaired	29	-0.659243	Svg152	Unpaired	29	0.840693	Svg152	Unpaired	29	0.703622	Svg152	Unpaired	29	3.71773
Svg152	Unpaired	30	-0.635031	Svg152	Unpaired	30	-1.38505	Svg152	Unpaired	30	-0.713396	Svg152	Unpaired	30	0.194638	Svg152	Unpaired	30	-0.85936	Svg152	Unpaired	30	-1.17783	Svg152	Unpaired	30	-0.100551	Svg152	Unpaired	30	-0.402391	Svg152	Unpaired	30	0.251242	Svg152	Unpaired	30	-0.42695	Svg152	Unpaired	30	-0.672695
Svg159	Unpaired	1	0.650491	Svg159	Unpaired	1	-0.474894	Svg159	Unpaired	1	-0.579147	Svg159	Unpaired	1	0.166547	Svg159	Unpaired	1	0.635764	Svg159	Unpaired	1	0.163135	Svg159	Unpaired	1	0.0096561	Svg159	Unpaired	1	1.6155	Svg159	Unpaired	1	1.50498	Svg159	Unpaired	1	0.893978	Svg159	Unpaired	1	1.11441
Svg159	Unpaired	2	1.02366	Svg159	Unpaired	2	0.0440618	Svg159	Unpaired	2	1.01397	Svg159	Unpaired	2	2.02257	Svg159	Unpaired	2	1.02901	Svg159	Unpaired	2	0.877924	Svg159	Unpaired	2	0.616493	Svg159	Unpaired	2	0.432447	Svg159	Unpaired	2	0.106387	Svg159	Unpaired	2	0.974932	Svg159	Unpaired	2	1.56889
Svg159	Unpaired	3	0.541615	Svg159	Unpaired	3	0.902664	Svg159	Unpaired	3	0.78242	Svg159	Unpaired	3	0.878409	Svg159	Unpaired	3	0.817812	Svg159	Unpaired	3	0.190774	Svg159	Unpaired	3	0.882992	Svg159	Unpaired	3	0.831585	Svg159	Unpaired	3	0.646081	Svg159	Unpaired	3	0.594491	Svg159	Unpaired	3	0.580138
Svg159	Unpaired	4	1.11028	Svg159	Unpaired	4	0.501221	Svg159	Unpaired	4	0.0732341	Svg159	Unpaired	4	0.657367	Svg159	Unpaired	4	0.143265	Svg159	Unpaired	4	0.292955	Svg159	Unpaired	4	-0.103118	Svg159	Unpaired	4	-0.458271	Svg159	Unpaired	4	0.600017	Svg159	Unpaired	4	1.3522	Svg159	Unpaired	4	0.677952
Svg159	Unpaired	5	0.423821	Svg159	Unpaired	5	0.838509	Svg159	Unpaired	5	0.625774	Svg159	Unpaired	5	1.81213	Svg159	Unpaired	5	0.698725	Svg159	Unpaired	5	0.0588042	Svg159	Unpaired	5	-0.0409876	Svg159	Unpaired	5	0.581745	Svg159	Unpaired	5	0.696019	Svg159	Unpaired	5	0.964347	Svg159	Unpaired	5	1.66253
Svg159	Unpaired	6	1.39379	Svg159	Unpaired	6	0.0520388	Svg159	Unpaired	6	0.196542	Svg159	Unpaired	6	0.353031	Svg159	Unpaired	6	0.0111973	Svg159	Unpaired	6	1.40977	Svg159	Unpaired	6	0.93015	Svg159	Unpaired	6	-0.0357482	Svg159	Unpaired	6	0.638932	Svg159	Unpaired	6	0.0465688	Svg159	Unpaired	6	0.768086
Svg159	Unpaired	7	0.20948	Svg159	Unpaired	7	0.989404	Svg159	Unpaired	7	0.214731	Svg159	Unpaired	7	1.14702	Svg159	Unpaired	7	0.201368	Svg159	Unpaired	7	0.393014	Svg159	Unpaired	7	0.739115	Svg159	Unpaired	7	0.109832	Svg159	Unpaired	7	0.344824	Svg159	Unpaired	7	0.593006	Svg159	Unpaired	7	0.492949
Svg159	Unpaired	8	0.0122398	Svg159	Unpaired	8	0.22802	Svg159	Unpaired	8	0.981863	Svg159	Unpaired	8	-0.126093	Svg159	Unpaired	8	0.370462	Svg159	Unpaired	8	0.793605	Svg159	Unpaired	8	0.164811	Svg159	Unpaired	8	0.294078	Svg159	Unpaired	8	0.894966	Svg159	Unpaired	8	0.7299	Svg159	Unpaired	8	0.611287
Svg159	Unpaired	9	0.276101	Svg159	Unpaired	9	0.0747502	Svg159	Unpaired	9	0.350865	Svg159	Unpaired	9	0.394594	Svg159	Unpaired	9	0.113754	Svg159	Unpaired	9	0.495504	Svg159	Unpaired	9	0.216603	Svg159	Unpaired	9	1.28674	Svg159	Unpaired	9	0.98622	Svg159	Unpaired	9	1.04796	Svg159	Unpaired	9	0.701896
Svg159	Unpaired	10	0.504884	Svg159	Unpaired	10	0.393784	Svg159	Unpaired	10	0.372926	Svg159	Unpaired	10	-0.0935365	Svg159	Unpaired	10	0.358937	Svg159	Unpaired	10	0.238432	Svg159	Unpaired	10	-0.125394	Svg159	Unpaired	10	0.573394	Svg159	Unpaired	10	0.822188	Svg159	Unpaired	10	0.689452	Svg159	Unpaired	10	1.39732
Svg159	Unpaired	11	0.201365	Svg159	Unpaired	11	0.511431	Svg159	Unpaired	11	0.139792	Svg159	Unpaired	11	0.294083	Svg159	Unpaired	11	-0.0939627	Svg159	Unpaired	11	0.0765397	Svg159	Unpaired	11	0.383821	Svg159	Unpaired	11	0.316138	Svg159	Unpaired	11	0.981798	Svg159	Unpaired	11	0.408105	Svg159	Unpaired	11	0.230377
Svg159	Unpaired	12	0.310429	Svg159	Unpaired	12	0.237086	Svg159	Unpaired	12	0.269913	Svg159	Unpaired	12	1.52541	Svg159	Unpaired	12	0.434197	Svg159	Unpaired	12	0.872786	Svg159	Unpaired	12	0.365482	Svg159	Unpaired	12	0.472161	Svg159	Unpaired	12	0.281914	Svg159	Unpaired	12	1.04912	Svg159	Unpaired	12	0.461657
Svg159	Unpaired	13	0.698925	Svg159	Unpaired	13	1.20817	Svg159	Unpaired	13	0.0691714	Svg159	Unpaired	13	2.8344	Svg159	Unpaired	13	0.211714	Svg159	Unpaired	13	0.0293719	Svg159	Unpaired	13	0.95725	Svg159	Unpaired	13	0.497821	Svg159	Unpaired	13	0.476176	Svg159	Unpaired	13	0.669338	Svg159	Unpaired	13	0.443996
Svg159	Unpaired	14	1.54449	Svg159	Unpaired	14	-0.0269125	Svg159	Unpaired	14	0.595993	Svg159	Unpaired	14	0.198157	Svg159	Unpaired	14	0.191421	Svg159	Unpaired	14	0.778157	Svg159	Unpaired	14	0.512841	Svg159	Unpaired	14	1.15925	Svg159	Unpaired	14	0.579845	Svg159	Unpaired	14	0.825787	Svg159	Unpaired	14	1.13763
Svg159	Unpaired	15	0.0623117	Svg159	Unpaired	15	-0.43119	Svg159	Unpaired	15	0.605899	Svg159	Unpaired	15	0.695511	Svg159	Unpaired	15	0.378729	Svg159	Unpaired	15	0.358693	Svg159	Unpaired	15	0.526022	Svg159	Unpaired	15	0.133493	Svg159	Unpaired	15	0.215448	Svg159	Unpaired	15	0.679634	Svg159	Unpaired	15	0.882748
Svg159	Unpaired	16	0.742631	Svg159	Unpaired	16	0.318676	Svg159	Unpaired	16	0.468701	Svg159	Unpaired	16	1.33956	Svg159	Unpaired	16	0.149779	Svg159	Unpaired	16	0.297696	Svg159	Unpaired	16	0.909305	Svg159	Unpaired	16	0.881832	Svg159	Unpaired	16	0.20929	Svg159	Unpaired	16	0.3609	Svg159	Unpaired	16	0.555158
Svg159	Unpaired	17	0.322782	Svg159	Unpaired	17	0.0664191	Svg159	Unpaired	17	0.59278	Svg159	Unpaired	17	-0.188859	Svg159	Unpaired	17	0.15088	Svg159	Unpaired	17	0.378433	Svg159	Unpaired	17	0.909927	Svg159	Unpaired	17	0.248554	Svg159	Unpaired	17	0.47298	Svg159	Unpaired	17	0.622851	Svg159	Unpaired	17	1.46876
Svg159	Unpaired	18	0.585032	Svg159	Unpaired	18	0.495361	Svg159	Unpaired	18	0.145078	Svg159	Unpaired	18	0.337748	Svg159	Unpaired	18	-5.0415	Svg159	Unpaired	18	0.41771	Svg159	Unpaired	18	0.439483	Svg159	Unpaired	18	0.663113	Svg159	Unpaired	18	0.303005	Svg159	Unpaired	18	0.593895	Svg159	Unpaired	18	0.735418
Svg159	Unpaired	19	1.14053	Svg159	Unpaired	19	0.363691	Svg159	Unpaired	19	1.78618	Svg159	Unpaired	19	0.198534	Svg159	Unpaired	19	0.0303029	Svg159	Unpaired	19	1.7048	Svg159	Unpaired	19	0.836968	Svg159	Unpaired	19	0.826644	Svg159	Unpaired	19	0.404507	Svg159	Unpaired	19	0.651952	Svg159	Unpaired	19	1.07039
Svg159	Unpaired	20	0.581399	Svg159	Unpaired	20	-0.141425	Svg159	Unpaired	20	0.0977961	Svg159	Unpaired	20	1.61996	Svg159	Unpaired	20	0.425169	Svg159	Unpaired	20	0.809521	Svg159	Unpaired	20	0.718822	Svg159	Unpaired	20	0.782701	Svg159	Unpaired	20	0.0632532	Svg159	Unpaired	20	0.386869	Svg159	Unpaired	20	1.28371
Svg159	Unpaired	21	1.08459	Svg159	Unpaired	21	1.97104	Svg159	Unpaired	21	0.359861	Svg159	Unpaired	21	0.279155	Svg159	Unpaired	21	0.670933	Svg159	Unpaired	21	1.12574	Svg159	Unpaired	21	-0.0169432	Svg159	Unpaired	21	0.643079	Svg159	Unpaired	21	0.251193	Svg159	Unpaired	21	0.427035	Svg159	Unpaired	21	0.639869
Svg159	Unpaired	22	0.301423	Svg159	Unpaired	22	0.496103	Svg159	Unpaired	22	0.650023	Svg159	Unpaired	22	0.718598	Svg159	Unpaired	22	0.522063	Svg159	Unpaired	22	-0.135587	Svg159	Unpaired	22	0.590669	Svg159	Unpaired	22	0.795824	Svg159	Unpaired	22	1.1456	Svg159	Unpaired	22	0.290642	Svg159	Unpaired	22	0.933989
Svg159	Unpaired	23	0.324863	Svg159	Unpaired	23	0.436762	Svg159	Unpaired	23	-0.0864852	Svg159	Unpaired	23	0.0852184	Svg159	Unpaired	23	0.835008	Svg159	Unpaired	23	0.323718	Svg159	Unpaired	23	0.250146	Svg159	Unpaired	23	1.07524	Svg159	Unpaired	23	0.587766	Svg159	Unpaired	23	0.154401	Svg159	Unpaired	23	0.557881
Svg159	Unpaired	24	0.39965	Svg159	Unpaired	24	0.579441	Svg159	Unpaired	24	0.690665	Svg159	Unpaired	24	0.29144	Svg159	Unpaired	24	0.0121882	Svg159	Unpaired	24	1.20286	Svg159	Unpaired	24	0.962478	Svg159	Unpaired	24	0.240007	Svg159	Unpaired	24	-0.0414803	Svg159	Unpaired	24	1.6357	Svg159	Unpaired	24	0.856499
Svg159	Unpaired	25	0.484501	Svg159	Unpaired	25	-0.168568	Svg159	Unpaired	25	0.413772	Svg159	Unpaired	25	0.414106	Svg159	Unpaired	25	0.346113	Svg159	Unpaired	25	0.464518	Svg159	Unpaired	25	0.633467	Svg159	Unpaired	25	0.268726	Svg159	Unpaired	25	0.208081	Svg159	Unpaired	25	0.294773	Svg159	Unpaired	25	1.05346
Svg159	Unpaired	26	0.489595	Svg159	Unpaired	26	0.396785	Svg159	Unpaired	26	1.28691	Svg159	Unpaired	26	0.538024	Svg159	Unpaired	26	0.0947814	Svg159	Unpaired	26	0.731482	Svg159	Unpaired	26	0.722705	Svg159	Unpaired	26	1.01037	Svg159	Unpaired	26	0.245854	Svg159	Unpaired	26	0.392479	Svg159	Unpaired	26	0.656445
Svg159	Unpaired	27	0.803829	Svg159	Unpaired	27	0.306989	Svg159	Unpaired	27	0.43877	Svg159	Unpaired	27	0.227655	Svg159	Unpaired	27	0.342889	Svg159	Unpaired	27	0.468465	Svg159	Unpaired	27	0.619394	Svg159	Unpaired	27	0.648625	Svg159	Unpaired	27	0.491053	Svg159	Unpaired	27	1.74286	Svg159	Unpaired	27	1.35583
Svg159	Unpaired	28	0.723466	Svg159	Unpaired	28	-0.0855548	Svg159	Unpaired	28	0.318475	Svg159	Unpaired	28	1.15209	Svg159	Unpaired	28	0.516066	Svg159	Unpaired	28	-0.0135662	Svg159	Unpaired	28	1.57048	Svg159	Unpaired	28	0.667258	Svg159	Unpaired	28	0.234773	Svg159	Unpaired	28	0.267764	Svg159	Unpaired	28	1.11372
Svg159	Unpaired	29	-0.177301	Svg159	Unpaired	29	0.826363	Svg159	Unpaired	29	-0.658866	Svg159	Unpaired	29	0.433446	Svg159	Unpaired	29	0.311608	Svg159	Unpaired	29	0.606379	Svg159	Unpaired	29	-0.104638	Svg159	Unpaired	29	0.677084	Svg159	Unpaired	29	0.0435634	Svg159	Unpaired	29	0.790291	Svg159	Unpaired	29	0.686873
Svg159	Unpaired	30	0.0860324	Svg159	Unpaired	30	-0.246392	Svg159	Unpaired	30	0.0706995	Svg159	Unpaired	30	-0.960099	Svg159	Unpaired	30	0.0128669	Svg159	Unpaired	30	-1.066	Svg159	Unpaired	30	0.255057	Svg159	Unpaired	30	-0.986578	Svg159	Unpaired	30	0.300165	Svg159	Unpaired	30	0.172159	Svg159	Unpaired	30	0.313314
Svg171	Unpaired	1	0.643375	Svg171	Unpaired	1	-0.608015	Svg171	Unpaired	1	-0.474163	Svg171	Unpaired	1	-0.50369	Svg171	Unpaired	1	0.00919755	Svg171	Unpaired	1	0.378419	Svg171	Unpaired	1	0.0846619	Svg171	Unpaired	1	0.0389311	Svg171	Unpaired	1	0.25373	Svg171	Unpaired	1	-0.163686	Svg171	Unpaired	1	1.16839
Svg171	Unpaired	2	0.737592	Svg171	Unpaired	2	-0.15514	Svg171	Unpaired	2	0.370292	Svg171	Unpaired	2	0.56838	Svg171	Unpaired	2	0.864794	Svg171	Unpaired	2	-0.23748	Svg171	Unpaired	2	0.00527245	Svg171	Unpaired	2	0.464051	Svg171	Unpaired	2	0.470923	Svg171	Unpaired	2	0.584609	Svg171	Unpaired	2	0.587407
Svg171	Unpaired	3	0.327746	Svg171	Unpaired	3	-0.250841	Svg171	Unpaired	3	1.20461	Svg171	Unpaired	3	0.6496	Svg171	Unpaired	3	0.761937	Svg171	Unpaired	3	0.328636	Svg171	Unpaired	3	0.543905	Svg171	Unpaired	3	0.865051	Svg171	Unpaired	3	0.805809	Svg171	Unpaired	3	0.166212	Svg171	Unpaired	3	0.410025
Svg171	Unpaired	4	0.943843	Svg171	Unpaired	4	1.27531	Svg171	Unpaired	4	0.0967808	Svg171	Unpaired	4	0.443465	Svg171	Unpaired	4	0.535793	Svg171	Unpaired	4	1.07194	Svg171	Unpaired	4	0.681571	Svg171	Unpaired	4	1.78084	Svg171	Unpaired	4	0.607769	Svg171	Unpaired	4	0.616074	Svg171	Unpaired	4	1.0168
Svg171	Unpaired	5	0.446439	Svg171	Unpaired	5	-0.703136	Svg171	Unpaired	5	0.586656	Svg171	Unpaired	5	0.219919	Svg171	Unpaired	5	0.838939	Svg171	Unpaired	5	0.453886	Svg171	Unpaired	5	0.641307	Svg171	Unpaired	5	0.76095	Svg171	Unpaired	5	0.518957	Svg171	Unpaired	5	1.07115	Svg171	Unpaired	5	1.45271
Svg171	Unpaired	6	0.762196	Svg171	Unpaired	6	-0.0245898	Svg171	Unpaired	6	0.321654	Svg171	Unpaired	6	1.33283	Svg171	Unpaired	6	0.50339	Svg171	Unpaired	6	0.270024	Svg171	Unpaired	6	0.172274	Svg171	Unpaired	6	1.44161	Svg171	Unpaired	6	0.555181	Svg171	Unpaired	6	0.701701	Svg171	Unpaired	6	-0.298321
Svg171	Unpaired	7	0.391074	Svg171	Unpaired	7	0.0792921	Svg171	Unpaired	7	0.812675	Svg171	Unpaired	7	0.322927	Svg171	Unpaired	7	0.749915	Svg171	Unpaired	7	-0.0977905	Svg171	Unpaired	7	-0.263142	Svg171	Unpaired	7	0.194507	Svg171	Unpaired	7	1.93013	Svg171	Unpaired	7	-0.40106	Svg171	Unpaired	7	0.58438
Svg171	Unpaired	8	0.138733	Svg171	Unpaired	8	1.60498	Svg171	Unpaired	8	0.269985	Svg171	Unpaired	8	-0.0467122	Svg171	Unpaired	8	0.0262162	Svg171	Unpaired	8	0.0612999	Svg171	Unpaired	8	1.00112	Svg171	Unpaired	8	0.369042	Svg171	Unpaired	8	-0.081102	Svg171	Unpaired	8	1.64392	Svg171	Unpaired	8	0.505503
Svg171	Unpaired	9	0.504966	Svg171	Unpaired	9	0.370866	Svg171	Unpaired	9	0.520395	Svg171	Unpaired	9	-0.173645	Svg171	Unpaired	9	0.866302	Svg171	Unpaired	9	0.652243	Svg171	Unpaired	9	0.123343	Svg171	Unpaired	9	0.729601	Svg171	Unpaired	9	-0.0665693	Svg171	Unpaired	9	1.21152	Svg171	Unpaired	9	1.32387
Svg171	Unpaired	10	-0.242694	Svg171	Unpaired	10	1.14615	Svg171	Unpaired	10	0.472197	Svg171	Unpaired	10	-0.0521409	Svg171	Unpaired	10	0.275039	Svg171	Unpaired	10	1.26293	Svg171	Unpaired	10	0.914413	Svg171	Unpaired	10	-0.274965	Svg171	Unpaired	10	1.20402	Svg171	Unpaired	10	1.04111	Svg171	Unpaired	10	1.10762
Svg171	Unpaired	11	-0.177115	Svg171	Unpaired	11	-0.0183016	Svg171	Unpaired	11	0.729018	Svg171	Unpaired	11	1.14404	Svg171	Unpaired	11	0.53217	Svg171	Unpaired	11	0.383451	Svg171	Unpaired	11	0.327896	Svg171	Unpaired	11	-0.0124441	Svg171	Unpaired	11	0.836906	Svg171	Unpaired	11	1.06518	Svg171	Unpaired	11	0.272942
Svg171	Unpaired	12	0.85047	Svg171	Unpaired	12	-0.265392	Svg171	Unpaired	12	0.956341	Svg171	Unpaired	12	0.0374488	Svg171	Unpaired	12	0.144403	Svg171	Unpaired	12	0.634964	Svg171	Unpaired	12	1.07785	Svg171	Unpaired	12	-0.322353	Svg171	Unpaired	12	0.889565	Svg171	Unpaired	12	0.593708	Svg171	Unpaired	12	0.301716
Svg171	Unpaired	13	0.914521	Svg171	Unpaired	13	1.05011	Svg171	Unpaired	13	-0.0376639	Svg171	Unpaired	13	0.0589164	Svg171	Unpaired	13	0.197672	Svg171	Unpaired	13	0.242292	Svg171	Unpaired	13	2.26268	Svg171	Unpaired	13	0.38209	Svg171	Unpaired	13	0.648978	Svg171	Unpaired	13	0.922806	Svg171	Unpaired	13	0.237839
Svg171	Unpaired	14	0.27103	Svg171	Unpaired	14	0.462531	Svg171	Unpaired	14	-0.200708	Svg171	Unpaired	14	0.183186	Svg171	Unpaired	14	0.511232	Svg171	Unpaired	14	0.586087	Svg171	Unpaired	14	-0.10556	Svg171	Unpaired	14	0.369942	Svg171	Unpaired	14	0.964707	Svg171	Unpaired	14	0.555179	Svg171	Unpaired	14	0.470101
Svg171	Unpaired	15	0.576314	Svg171	Unpaired	15	-0.0305805	Svg171	Unpaired	15	0.414048	Svg171	Unpaired	15	-0.00891558	Svg171	Unpaired	15	0.39169	Svg171	Unpaired	15	1.26889	Svg171	Unpaired	15	0.502581	Svg171	Unpaired	15	0.0316143	Svg171	Unpaired	15	0.703179	Svg171	Unpaired	15	0.370686	Svg171	Unpaired	15	0.529126
Svg171	Unpaired	16	0.263613	Svg171	Unpaired	16	0.567939	Svg171	Unpaired	16	0.306272	Svg171	Unpaired	16	0.240066	Svg171	Unpaired	16	-0.0844719	Svg171	Unpaired	16	0.471751	Svg171	Unpaired	16	-0.495566	Svg171	Unpaired	16	0.836895	Svg171	Unpaired	16	1.15402	Svg171	Unpaired	16	1.09585	Svg171	Unpaired	16	0.951517
Svg171	Unpaired	17	0.159838	Svg171	Unpaired	17	-0.287044	Svg171	Unpaired	17	0.352645	Svg171	Unpaired	17	0.0483597	Svg171	Unpaired	17	1.25792	Svg171	Unpaired	17	1.08519	Svg171	Unpaired	17	0.114969	Svg171	Unpaired	17	0.0501316	Svg171	Unpaired	17	1.37315	Svg171	Unpaired	17	0.803514	Svg171	Unpaired	17	0.119005
Svg171	Unpaired	18	0.171746	Svg171	Unpaired	18	0.0562157	Svg171	Unpaired	18	0.342869	Svg171	Unpaired	18	0.394606	Svg171	Unpaired	18	0.477499	Svg171	Unpaired	18	0.396386	Svg171	Unpaired	18	-0.0899385	Svg171	Unpaired	18	1.60529	Svg171	Unpaired	18	0.547437	Svg171	Unpaired	18	0.898748	Svg171	Unpaired	18	0.0902343
Svg171	Unpaired	19	0.100047	Svg171	Unpaired	19	0.0543662	Svg171	Unpaired	19	0.361866	Svg171	Unpaired	19	2.71801	Svg171	Unpaired	19	0.329657	Svg171	Unpaired	19	0.0034211	Svg171	Unpaired	19	0.762469	Svg171	Unpaired	19	0.744973	Svg171	Unpaired	19	0.455973	Svg171	Unpaired	19	-0.294499	Svg171	Unpaired	19	0.553086
Svg171	Unpaired	20	0.00229846	Svg171	Unpaired	20	0.361912	Svg171	Unpaired	20	0.378027	Svg171	Unpaired	20	0.515808	Svg171	Unpaired	20	0.309424	Svg171	Unpaired	20	0.14439	Svg171	Unpaired	20	0.621968	Svg171	Unpaired	20	0.0790892	Svg171	Unpaired	20	0.0344357	Svg171	Unpaired	20	0.591671	Svg171	Unpaired	20	0.371916
Svg171	Unpaired	21	0.822038	Svg171	Unpaired	21	0.139485	Svg171	Unpaired	21	0.885037	Svg171	Unpaired	21	0.339887	Svg171	Unpaired	21	1.00306	Svg171	Unpaired	21	0.438705	Svg171	Unpaired	21	0.0711453	Svg171	Unpaired	21	0.438757	Svg171	Unpaired	21	0.638109	Svg171	Unpaired	21	1.2368	Svg171	Unpaired	21	0.740084
Svg171	Unpaired	22	0.000665012	Svg171	Unpaired	22	1.16451	Svg171	Unpaired	22	-0.212066	Svg171	Unpaired	22	0.284802	Svg171	Unpaired	22	1.06618	Svg171	Unpaired	22	0.29788	Svg171	Unpaired	22	-0.411979	Svg171	Unpaired	22	-0.0977465	Svg171	Unpaired	22	0.857089	Svg171	Unpaired	22	1.0586	Svg171	Unpaired	22	-0.1168
Svg171	Unpaired	23	1.07334	Svg171	Unpaired	23	0.383519	Svg171	Unpaired	23	0.152087	Svg171	Unpaired	23	0.785884	Svg171	Unpaired	23	0.441822	Svg171	Unpaired	23	0.486447	Svg171	Unpaired	23	-0.494098	Svg171	Unpaired	23	0.437279	Svg171	Unpaired	23	0.567425	Svg171	Unpaired	23	0.691102	Svg171	Unpaired	23	0.429636
Svg171	Unpaired	24	0.381104	Svg171	Unpaired	24	-0.0575863	Svg171	Unpaired	24	0.225316	Svg171	Unpaired	24	-0.157016	Svg171	Unpaired	24	0.654275	Svg171	Unpaired	24	0.594297	Svg171	Unpaired	24	-0.378415	Svg171	Unpaired	24	0.136579	Svg171	Unpaired	24	0.924675	Svg171	Unpaired	24	0.69231	Svg171	Unpaired	24	1.58354
Svg171	Unpaired	25	-0.312672	Svg171	Unpaired	25	-0.0768808	Svg171	Unpaired	25	0.198185	Svg171	Unpaired	25	0.364974	Svg171	Unpaired	25	1.15705	Svg171	Unpaired	25	0.538134	Svg171	Unpaired	25	-0.234024	Svg171	Unpaired	25	1.3582	Svg171	Unpaired	25	1.53186	Svg171	Unpaired	25	0.803121	Svg171	Unpaired	25	0.645587
Svg171	Unpaired	26	1.05399	Svg171	Unpaired	26	-0.0699064	Svg171	Unpaired	26	0.501166	Svg171	Unpaired	26	0.266859	Svg171	Unpaired	26	1.18397	Svg171	Unpaired	26	0.885894	Svg171	Unpaired	26	-0.120971	Svg171	Unpaired	26	-0.0784971	Svg171	Unpaired	26	1.76856	Svg171	Unpaired	26	0.185653	Svg171	Unpaired	26	0.558248
Svg171	Unpaired	27	0.486725	Svg171	Unpaired	27	0.0935648	Svg171	Unpaired	27	0.608671	Svg171	Unpaired	27	0.102748	Svg171	Unpaired	27	0.185789	Svg171	Unpaired	27	0.119135	Svg171	Unpaired	27	-0.1325	Svg171	Unpaired	27	0.247971	Svg171	Unpaired	27	0.669859	Svg171	Unpaired	27	0.72438	Svg171	Unpaired	27	0.647941
Svg171	Unpaired	28	0.232445	Svg171	Unpaired	28	0.776388	Svg171	Unpaired	28	0.41485	Svg171	Unpaired	28	0.258442	Svg171	Unpaired	28	0.333127	Svg171	Unpaired	28	1.41015	Svg171	Unpaired	28	-0.156642	Svg171	Unpaired	28	0.293069	Svg171	Unpaired	28	0.601933	Svg171	Unpaired	28	0.763464	Svg171	Unpaired	28	0.166486
Svg171	Unpaired	29	0.703441	Svg171	Unpaired	29	0.109253	Svg171	Unpaired	29	0.265977	Svg171	Unpaired	29	0.344422	Svg171	Unpaired	29	0.0864617	Svg171	Unpaired	29	-0.113356	Svg171	Unpaired	29	-0.562399	Svg171	Unpaired	29	1.02987	Svg171	Unpaired	29	-0.0731614	Svg171	Unpaired	29	0.0810831	Svg171	Unpaired	29	0.127466
Svg171	Unpaired	30	-0.208103	Svg171	Unpaired	30	0.051458	Svg171	Unpaired	30	0.188529	Svg171	Unpaired	30	0.222053	Svg171	Unpaired	30	-0.397256	Svg171	Unpaired	30	-0.261985	Svg171	Unpaired	30	-0.339162	Svg171	Unpaired	30	0.222853	Svg171	Unpaired	30	0.629918	Svg171	Unpaired	30	0.644826	Svg171	Unpaired	30	-0.291927
Svg173	Unpaired	1	0.315488	Svg173	Unpaired	1	0.38337	Svg173	Unpaired	1	0.621517	Svg173	Unpaired	1	1.21067	Svg173	Unpaired	1	0.0304822	Svg173	Unpaired	1	0.251416	Svg173	Unpaired	1	0.000367921	Svg173	Unpaired	1	0.805045	Svg173	Unpaired	1	0.691915	Svg173	Unpaired	1	2.35678	Svg173	Unpaired	1	0.0074193
Svg173	Unpaired	2	1.26786	Svg173	Unpaired	2	0.368474	Svg173	Unpaired	2	0.594916	Svg173	Unpaired	2	-0.338449	Svg173	Unpaired	2	0.523508	Svg173	Unpaired	2	1.3009	Svg173	Unpaired	2	0.273816	Svg173	Unpaired	2	1.16253	Svg173	Unpaired	2	-0.376735	Svg173	Unpaired	2	0.360889	Svg173	Unpaired	2	2.93737
Svg173	Unpaired	3	0.387545	Svg173	Unpaired	3	-0.230357	Svg173	Unpaired	3	1.19029	Svg173	Unpaired	3	1.20575	Svg173	Unpaired	3	0.329588	Svg173	Unpaired	3	0.601947	Svg173	Unpaired	3	1.04686	Svg173	Unpaired	3	0.436911	Svg173	Unpaired	3	3.23871	Svg173	Unpaired	3	1.22608	Svg173	Unpaired	3	0.862012
Svg173	Unpaired	4	0.176103	Svg173	Unpaired	4	0.191265	Svg173	Unpaired	4	0.677646	Svg173	Unpaired	4	0.254312	Svg173	Unpaired	4	0.759573	Svg173	Unpaired	4	1.1375	Svg173	Unpaired	4	1.31221	Svg173	Unpaired	4	-0.140624	Svg173	Unpaired	4	-0.250011	Svg173	Unpaired	4	2.19314	Svg173	Unpaired	4	1.24747
Svg173	Unpaired	5	0.394759	Svg173	Unpaired	5	0.817075	Svg173	Unpaired	5	0.882215	Svg173	Unpaired	5	2.0097	Svg173	Unpaired	5	0.838632	Svg173	Unpaired	5	0.640588	Svg173	Unpaired	5	0.318965	Svg173	Unpaired	5	0.797604	Svg173	Unpaired	5	1.14459	Svg173	Unpaired	5	0.169223	Svg173	Unpaired	5	1.37549
Svg173	Unpaired	6	2.47226	Svg173	Unpaired	6	0.534816	Svg173	Unpaired	6	0.368783	Svg173	Unpaired	6	0.386288	Svg173	Unpaired	6	0.543218	Svg173	Unpaired	6	1.04968	Svg173	Unpaired	6	1.40196	Svg173	Unpaired	6	0.400043	Svg173	Unpaired	6	0.422172	Svg173	Unpaired	6	2.55166	Svg173	Unpaired	6	0.216752
Svg173	Unpaired	7	0.529141	Svg173	Unpaired	7	-0.534532	Svg173	Unpaired	7	1.32537	Svg173	Unpaired	7	0.051371	Svg173	Unpaired	7	0.00993727	Svg173	Unpaired	7	0.367629	Svg173	Unpaired	7	1.23191	Svg173	Unpaired	7	1.2558	Svg173	Unpaired	7	0.539539	Svg173	Unpaired	7	0.201712	Svg173	Unpaired	7	1.8298
Svg173	Unpaired	8	0.489143	Svg173	Unpaired	8	0.957237	Svg173	Unpaired	8	-0.554585	Svg173	Unpaired	8	0.976008	Svg173	Unpaired	8	1.438	Svg173	Unpaired	8	1.31483	Svg173	Unpaired	8	0.617015	Svg173	Unpaired	8	1.33349	Svg173	Unpaired	8	0.421726	Svg173	Unpaired	8	1.60062	Svg173	Unpaired	8	0.451159
Svg173	Unpaired	9	0.233768	Svg173	Unpaired	9	-0.371287	Svg173	Unpaired	9	0.32588	Svg173	Unpaired	9	1.63487	Svg173	Unpaired	9	0.956192	Svg173	Unpaired	9	0.87873	Svg173	Unpaired	9	1.03881	Svg173	Unpaired	9	1.09881	Svg173	Unpaired	9	0.897292	Svg173	Unpaired	9	0.395184	Svg173	Unpaired	9	0.938265
Svg173	Unpaired	10	1.83875	Svg173	Unpaired	10	-0.165179	Svg173	Unpaired	10	0.704425	Svg173	Unpaired	10	0.471018	Svg173	Unpaired	10	0.909624	Svg173	Unpaired	10	1.15147	Svg173	Unpaired	10	0.784145	Svg173	Unpaired	10	0.945426	Svg173	Unpaired	10	1.79492	Svg173	Unpaired	10	1.2772	Svg173	Unpaired	10	1.16948
Svg173	Unpaired	11	0.407956	Svg173	Unpaired	11	0.381336	Svg173	Unpaired	11	1.00397	Svg173	Unpaired	11	2.37891	Svg173	Unpaired	11	-0.0871792	Svg173	Unpaired	11	1.72116	Svg173	Unpaired	11	1.18608	Svg173	Unpaired	11	1.07257	Svg173	Unpaired	11	0.948585	Svg173	Unpaired	11	0.830696	Svg173	Unpaired	11	2.18675
Svg173	Unpaired	12	-0.247313	Svg173	Unpaired	12	0.16087	Svg173	Unpaired	12	0.435024	Svg173	Unpaired	12	-0.0827188	Svg173	Unpaired	12	2.20319	Svg173	Unpaired	12	0.232369	Svg173	Unpaired	12	0.78745	Svg173	Unpaired	12	2.65151	Svg173	Unpaired	12	-0.0221551	Svg173	Unpaired	12	0.358153	Svg173	Unpaired	12	-0.0016698
Svg173	Unpaired	13	1.25815	Svg173	Unpaired	13	0.325734	Svg173	Unpaired	13	0.672104	Svg173	Unpaired	13	0.76751	Svg173	Unpaired	13	0.856342	Svg173	Unpaired	13	0.656751	Svg173	Unpaired	13	3.0035	Svg173	Unpaired	13	1.00946	Svg173	Unpaired	13	3.62856	Svg173	Unpaired	13	0.58282	Svg173	Unpaired	13	0.677963
Svg173	Unpaired	14	0.212464	Svg173	Unpaired	14	1.62614	Svg173	Unpaired	14	0.912985	Svg173	Unpaired	14	0.672078	Svg173	Unpaired	14	1.64588	Svg173	Unpaired	14	1.5683	Svg173	Unpaired	14	0.58843	Svg173	Unpaired	14	1.36753	Svg173	Unpaired	14	0.652898	Svg173	Unpaired	14	1.94072	Svg173	Unpaired	14	1.21575
Svg173	Unpaired	15	1.567	Svg173	Unpaired	15	0.843721	Svg173	Unpaired	15	0.543836	Svg173	Unpaired	15	0.626496	Svg173	Unpaired	15	0.258966	Svg173	Unpaired	15	1.07901	Svg173	Unpaired	15	0.802071	Svg173	Unpaired	15	1.00017	Svg173	Unpaired	15	-0.0168629	Svg173	Unpaired	15	0.95213	Svg173	Unpaired	15	0.393372
Svg173	Unpaired	16	0.961057	Svg173	Unpaired	16	-0.414856	Svg173	Unpaired	16	1.42103	Svg173	Unpaired	16	1.78172	Svg173	Unpaired	16	1.2592	Svg173	Unpaired	16	1.914	Svg173	Unpaired	16	1.82536	Svg173	Unpaired	16	0.572576	Svg173	Unpaired	16	0.766961	Svg173	Unpaired	16	0.783879	Svg173	Unpaired	16	0.953262
Svg173	Unpaired	17	1.06499	Svg173	Unpaired	17	0.498491	Svg173	Unpaired	17	1.01946	Svg173	Unpaired	17	0.460785	Svg173	Unpaired	17	2.37999	Svg173	Unpaired	17	0.916613	Svg173	Unpaired	17	0.45534	Svg173	Unpaired	17	0.686085	Svg173	Unpaired	17	0.973388	Svg173	Unpaired	17	0.813988	Svg173	Unpaired	17	0.515434
Svg173	Unpaired	18	0.722397	Svg173	Unpaired	18	0.9343	Svg173	Unpaired	18	0.588913	Svg173	Unpaired	18	0.718837	Svg173	Unpaired	18	0.227561	Svg173	Unpaired	18	-0.00801345	Svg173	Unpaired	18	1.42753	Svg173	Unpaired	18	0.600696	Svg173	Unpaired	18	0.381921	Svg173	Unpaired	18	0.8498	Svg173	Unpaired	18	0.474202
Svg173	Unpaired	19	-0.879295	Svg173	Unpaired	19	0.298773	Svg173	Unpaired	19	1.50037	Svg173	Unpaired	19	1.3724	Svg173	Unpaired	19	0.580028	Svg173	Unpaired	19	3.63091	Svg173	Unpaired	19	1.0101	Svg173	Unpaired	19	0.642831	Svg173	Unpaired	19	0.722569	Svg173	Unpaired	19	0.934962	Svg173	Unpaired	19	1.36181
Svg173	Unpaired	20	0.743665	Svg173	Unpaired	20	0.241655	Svg173	Unpaired	20	0.126812	Svg173	Unpaired	20	1.21007	Svg173	Unpaired	20	1.34646	Svg173	Unpaired	20	1.05994	Svg173	Unpaired	20	2.68146	Svg173	Unpaired	20	2.64192	Svg173	Unpaired	20	0.34325	Svg173	Unpaired	20	0.587898	Svg173	Unpaired	20	1.02001
Svg173	Unpaired	21	-0.571336	Svg173	Unpaired	21	1.05722	Svg173	Unpaired	21	0.568071	Svg173	Unpaired	21	1.19987	Svg173	Unpaired	21	1.15297	Svg173	Unpaired	21	0.185625	Svg173	Unpaired	21	1.232	Svg173	Unpaired	21	0.668824	Svg173	Unpaired	21	0.720801	Svg173	Unpaired	21	1.32728	Svg173	Unpaired	21	0.835733
Svg173	Unpaired	22	0.089622	Svg173	Unpaired	22	-0.072085	Svg173	Unpaired	22	1.77159	Svg173	Unpaired	22	0.868136	Svg173	Unpaired	22	0.889451	Svg173	Unpaired	22	0.96099	Svg173	Unpaired	22	0.685468	Svg173	Unpaired	22	2.11914	Svg173	Unpaired	22	0.932169	Svg173	Unpaired	22	-0.133637	Svg173	Unpaired	22	1.10639
Svg173	Unpaired	23	0.278141	Svg173	Unpaired	23	-0.383583	Svg173	Unpaired	23	0.504154	Svg173	Unpaired	23	2.58929	Svg173	Unpaired	23	1.87581	Svg173	Unpaired	23	0.559914	Svg173	Unpaired	23	0.914218	Svg173	Unpaired	23	1.94376	Svg173	Unpaired	23	0.586417	Svg173	Unpaired	23	1.05921	Svg173	Unpaired	23	1.25362
Svg173	Unpaired	24	0.712246	Svg173	Unpaired	24	0.0154945	Svg173	Unpaired	24	1.33919	Svg173	Unpaired	24	0.522183	Svg173	Unpaired	24	0.680576	Svg173	Unpaired	24	2.00978	Svg173	Unpaired	24	2.01974	Svg173	Unpaired	24	2.46254	Svg173	Unpaired	24	0.189315	Svg173	Unpaired	24	0.0745608	Svg173	Unpaired	24	0.018534
Svg173	Unpaired	25	0.381355	Svg173	Unpaired	25	0.731436	Svg173	Unpaired	25	1.27294	Svg173	Unpaired	25	1.38923	Svg173	Unpaired	25	2.24635	Svg173	Unpaired	25	0.622097	Svg173	Unpaired	25	1.08629	Svg173	Unpaired	25	0.922842	Svg173	Unpaired	25	0.717262	Svg173	Unpaired	25	1.34034	Svg173	Unpaired	25	1.46752
Svg173	Unpaired	26	0.457904	Svg173	Unpaired	26	0.0991852	Svg173	Unpaired	26	0.759055	Svg173	Unpaired	26	-0.2596	Svg173	Unpaired	26	0.754357	Svg173	Unpaired	26	0.402124	Svg173	Unpaired	26	1.09393	Svg173	Unpaired	26	1.51414	Svg173	Unpaired	26	1.10118	Svg173	Unpaired	26	0.972524	Svg173	Unpaired	26	0.669367
Svg173	Unpaired	27	0.264593	Svg173	Unpaired	27	0.476153	Svg173	Unpaired	27	2.16889	Svg173	Unpaired	27	2.55363	Svg173	Unpaired	27	0.67056	Svg173	Unpaired	27	0.00397932	Svg173	Unpaired	27	1.29261	Svg173	Unpaired	27	1.31826	Svg173	Unpaired	27	0.669045	Svg173	Unpaired	27	1.18696	Svg173	Unpaired	27	0.552425
Svg173	Unpaired	28	1.19507	Svg173	Unpaired	28	1.17331	Svg173	Unpaired	28	1.43615	Svg173	Unpaired	28	0.534206	Svg173	Unpaired	28	0.35182	Svg173	Unpaired	28	0.598439	Svg173	Unpaired	28	0.93965	Svg173	Unpaired	28	0.137334	Svg173	Unpaired	28	0.764171	Svg173	Unpaired	28	0.161693	Svg173	Unpaired	28	0.844241
Svg173	Unpaired	29	0.0149297	Svg173	Unpaired	29	0.519521	Svg173	Unpaired	29	1.06294	Svg173	Unpaired	29	0.31264	Svg173	Unpaired	29	1.2795	Svg173	Unpaired	29	2.28344	Svg173	Unpaired	29	0.756766	Svg173	Unpaired	29	0.974541	Svg173	Unpaired	29	0.131037	Svg173	Unpaired	29	1.03326	Svg173	Unpaired	29	1.3678
Svg173	Unpaired	30	0.599036	Svg173	Unpaired	30	1.67601	Svg173	Unpaired	30	1.11881	Svg173	Unpaired	30	1.03463	Svg173	Unpaired	30	0.229023	Svg173	Unpaired	30	-0.449204	Svg173	Unpaired	30	0.786536	Svg173	Unpaired	30	0.696505	Svg173	Unpaired	30	0.720908	Svg173	Unpaired	30	0.589743	Svg173	Unpaired	30	0.196887
