# Supplementary material for: Dopamine activity encodes the changing valence of the same stimulus in conditioned taste aversion paradigms
Source: eLife. 2025 Mar 5;13:RP103260. doi: 10.7554/eLife.103260 (PMC11882140; doi:10.7554/eLife.103260)
Supplement: Figure 9—source data 1. [file elife-103260-fig9-data1.xlsx]

## Sheet: Figure 9A
Unpaired
	C1	C2	C3	E1	E2	E3	E4	E5	E6	E7	E8
Svg146	-21.4469	-11.7887	-14.9855	-10.8256	-16.8679	-11.2063	-12.041	-9.60762	-6.68479	-10.0223	-6.8752
Svg149	-10.7025	-5.9435	-14.3918	-11.7221	-13.138	-9.2319	-10.3359	-19.6459	-3.93335	-11.8091	-17.4726
Svg150	-5.27827	-12.67	-11.2617	-10.7352	-14.6612	-14.3071	-18.0538	-15.0836	-20.6647	-15.1539	-18.1968
Svg152	-15.0303	-21.4117	-14.2512	-14.862	-17.2038	-17.745	-8.49402	-12.4106	-13.8335	-13.0508	-10.816
Svg159	-7.15408	-8.14272	-12.4958	-5.77501	-15.5467	-15.4192	-12.4084	-14.9537	-18.3482	-15.3109	-13.1805
Svg171	-10.0978	-6.66923	-5.65702	-3.06449	-7.71464	-8.77678	-11.6876	-10.3101	-10.6587	-4.31222	-11.4301
Svg173	-13.4645	-6.89629	-12.6644	-2.27509	-5.44512	-3.55972	-12.5092	-10.1739	-2.93671	-10.5638	-10.3325
Svg138	-11.95	-3.469	1.7172	-1.067	6.1174	-10.27	-9.953	-9.604	-17.19	-11.16	-10.42
Svg141	-10.27	-12.13	3.4545	4.6496	-4.538	0.1993	-8.473	-11.86	-7.114	-3.894	-11.16
Svg145	-7.053	-7.845	3.2183	7.5862	2.0959	4.8619	-8.331	-8.136	-3.844	-10.62	-18.29
Svg148	-11.8	8.9112	9.1887	7.1276	10.342	7.1151	6.5913	1.1178	5.1132	-12.24	-11.99
Svg151	-9.723	-4.148	-4.55	3.4815	4.3394	-1.95	-2.464	-5.604	-5.928	-4.819	-4.946
Svg156	-3.556	-9.587	0.3932	1.3682	-4.931	0.4799	5.7422	-0.639	2.5862	-7.154	-8.588
Svg157	-0.34	-1.7	-1.32	3.1181	2.7276	-0.441	-3.297	-5.699	-6.153	-8.366	-5.7
Svg165	-10.85	3.8227	6.5902	2.7867	2.4557	6.678	3.8669	4.7145	5.4861	1.2559	-6.942

## Sheet: Figure 9B
Avg. Head Movement	all	unpaired	E1	E2	E3	E4	E5	E6	E7	E8	paired	E1	E2	E3	E4	E5	E6	E7	E8
1.12715	-10.8256	-10.8256	-10.8256
0.64154	-11.7221	-11.7221	-11.7221
1.01115	-10.7352	-10.7352	-10.7352
0.0755428	-14.862	-14.862	-14.862
0.640344	-5.77501	-5.77501	-5.77501
0.363517	-3.06449	-3.06449	-3.06449
0.950395	-2.27509	-2.27509	-2.27509
1.31735	-16.8679	-16.8679		-16.8679
0.162718	-13.138	-13.138		-13.138
0.929444	-14.6612	-14.6612		-14.6612
0.195777	-17.2038	-17.2038		-17.2038
0.493318	-15.5467	-15.5467		-15.5467
0.507106	-7.71464	-7.71464		-7.71464
0.904654	-5.44512	-5.44512		-5.44512
0.81149	-11.2063	-11.2063			-11.2063
0.478188	-9.2319	-9.2319			-9.2319
1.34692	-14.3071	-14.3071			-14.3071
0.162604	-17.745	-17.745			-17.745
0.821117	-15.4192	-15.4192			-15.4192
0.458541	-8.77678	-8.77678			-8.77678
0.954764	-3.55972	-3.55972			-3.55972
0.980096	-12.041	-12.041				-12.041
0.511102	-10.3359	-10.3359				-10.3359
1.01314	-18.0538	-18.0538				-18.0538
0.0706967	-8.49402	-8.49402				-8.49402
0.774399	-12.4084	-12.4084				-12.4084
0.204168	-11.6876	-11.6876				-11.6876
1.08669	-12.5092	-12.5092				-12.5092
1.10858	-9.60762	-9.60762					-9.60762
0.541754	-19.6459	-19.6459					-19.6459
1.05384	-15.0836	-15.0836					-15.0836
0.377777	-12.4106	-12.4106					-12.4106
0.811006	-14.9537	-14.9537					-14.9537
0.470773	-10.3101	-10.3101					-10.3101
1.10328	-10.1739	-10.1739					-10.1739
0.879693	-6.68479	-6.68479						-6.68479
0.489847	-3.93335	-3.93335						-3.93335
0.884678	-20.6647	-20.6647						-20.6647
0.464183	-13.8335	-13.8335						-13.8335
0.744548	-18.3482	-18.3482						-18.3482
0.730782	-10.6587	-10.6587						-10.6587
0.781185	-2.93671	-2.93671						-2.93671
1.10682	-10.0223	-10.0223							-10.0223
0.67678	-11.8091	-11.8091							-11.8091
0.835559	-15.1539	-15.1539							-15.1539
0.342477	-13.0508	-13.0508							-13.0508
0.502016	-15.3109	-15.3109							-15.3109
0.665191	-4.31222	-4.31222							-4.31222
0.952649	-10.5638	-10.5638							-10.5638
0.861024	-6.8752	-6.8752								-6.8752
0.867106	-17.4726	-17.4726								-17.4726
0.767411	-18.1968	-18.1968								-18.1968
0.432582	-10.816	-10.816								-10.816
0.552808	-13.1805	-13.1805								-13.1805
0.541537	-11.4301	-11.4301								-11.4301
0.938154	-10.3325	-10.3325								-10.3325
-0.251917	-1.067										-1.067	-1.067
-0.467232	4.64958										4.64958	4.64958
-0.297232	7.58621										7.58621	7.58621
-0.452236	7.12762										7.12762	7.12762
-0.203708	3.48145										3.48145	3.48145
-0.349309	1.36822										1.36822	1.36822
-0.504441	3.11805										3.11805	3.11805
-0.166819	2.78673										2.78673	2.78673
-0.255859	6.1174										6.1174		6.1174
-0.0833412	-4.53841										-4.53841		-4.53841
-0.428466	2.0959										2.0959		2.0959
-0.366208	10.3416										10.3416		10.3416
-0.34136	4.33935										4.33935		4.33935
-0.34694	-4.9308										-4.9308		-4.9308
-0.561712	2.7276										2.72761		2.72761
-0.159297	2.45572										2.45572		2.45572
-0.0853989	-10.2737										-10.2737			-10.2737
-0.157689	0.199329										0.199329			0.199329
-0.216351	4.86192										4.86192			4.86192
-0.144482	7.11508										7.11508			7.11508
-0.213663	-1.95028										-1.95028			-1.95028
-0.342256	0.479934										0.479934			0.479934
-0.518206	-0.440583										-0.44058			-0.44058
-0.213584	6.67795										6.67795			6.67795
-0.283197	-9.95293										-9.95293				-9.95293
0.168024	-8.47339										-8.47339				-8.47339
-0.125045	-8.33094										-8.33094				-8.33094
-0.359079	6.59127										6.59127				6.59127
-0.240349	-2.46362										-2.46362				-2.46362
-0.326945	5.7422										5.7422				5.7422
-0.376314	-3.29667										-3.29667				-3.29667
-0.177123	3.86691										3.86691				3.86691
-0.0152799	-9.60401										-9.60401					-9.60401
0.0632413	-11.8612										-11.8612					-11.8612
0.10196	-8.13583										-8.13583					-8.13583
-0.148692	1.11775										1.11775					1.11775
-0.28907	-5.6036										-5.6036					-5.6036
-0.333709	-0.6388										-0.6388					-0.6388
-0.406836	-5.69873										-5.69873					-5.69873
-0.286884	4.71452										4.71452					4.71452
0.0423906	-17.1893										-17.1893						-17.1893
0.398403	-7.11371										-7.11371						-7.11371
0.300585	-3.84379										-3.84379						-3.84379
0.253423	5.11325										5.11325						5.11325
0.133525	-5.92754										-5.92754						-5.92754
0.139283	2.58617										2.58617						2.58617
-0.148474	-8.36577										-8.36577						-8.36577
-0.0598287	5.48608										5.48608						5.48608
0.0751806	-11.1569										-11.1569							-11.1569
-0.0054811	-3.89435										-3.89435							-3.89435
0.808264	-10.62										-10.62							-10.62
0.806277	-12.2414										-12.2414							-12.2414
0.268048	-4.81944										-4.81944							-4.81944
0.368049	-7.15418										-7.15418							-7.15418
-0.194116	-8.36577										-8.36577							-8.36577
0.432371	1.25586										1.25586							1.25586
0.261234	-10.423										-10.423								-10.423
0.314045	-11.1556										-11.1556								-11.1556
0.639868	-18.2909										-18.2909								-18.2909
1.02263	-11.9857										-11.9857								-11.9857
0.453424	-4.94562										-4.94562								-4.94562
1.26721	-8.58765										-8.58765								-8.58765
-0.0881099	-5.69993										-5.69993								-5.69993
0.72065	-6.94198										-6.94198								-6.94198

## Sheet: Figure 9C
		Unpaired								Paired
	C1
	C2
	C3
	E1	0.95	0.923077	1	0.916667	0.9375	0.928571	1		0.428571	0.333333	0.333333	0.142857	0.222222	0.125	0	0.333333
	E2	0.9375	0.736842	0.833333	1	0.958333	0.857143	1		0.25	0.5	0.333333	0.0588235	0.166667	0.0555556	0	0
	E3	0.958333	0.9375	0.875	0.75	0.933333	0.928571	1		0	0.5	0.684211	0.1	0.5	0.285714	0.25	0.6
	E4	0.956522	1	0.952381	0.9	0.866667	0.6	1		0.2	0.636364	0.5	0.5	0.2	0.388889	0.333333	0.444444
	E5	0.92	0.956522	0.909091	0.884615	0.931034	0.857143	0.956522		0.75	0.846154	0.857143	0.142857	0.6	0.333333	0.5	0.333333
	E6	0.952381	0.9375	0.866667	0.956522	0.947368	1	0.882353		0.833333	0.875	0.933333	0.6	0.6	0.5	0.333333	0.333333
	E7	0.9375	0.96	0.9	0.909091	0.962963	0.904762	1		0.944444	0.615385	1	1	0.666667	0.428571	0.5	0.2
	E8	1	0.92	0.909091	0.888889	0.964286	0.935484	0.962963		1	0.928571	1	1	0.2	0.5	0.666667	0.4

## Sheet: Figure 9D
mean z-score	all	unpaired	E1	E2	E3	E4	E5	E6	E7	E8	paired	E1	E2	E3	E4	E5	E6	E7	E8
1.12715	0.95	0.95	0.95
0.64154	0.923077	0.923077	0.923077
1.01115	1	1	1
0.075543	0.916667	0.916667	0.916667
0.640344	0.9375	0.9375	0.9375
0.363517	0.928571	0.928571	0.928571
0.950395	1	1	1
1.31735	0.9375	0.9375		0.9375
0.162718	0.736842	0.736842		0.736842
0.929444	0.833333	0.833333		0.833333
0.195777	1	1		1
0.493318	0.958333	0.958333		0.958333
0.507106	0.857143	0.857143		0.857143
0.904654	1	1		1
0.81149	0.958333	0.958333			0.958333
0.478188	0.9375	0.9375			0.9375
1.34692	0.875	0.875			0.875
0.162604	0.75	0.75			0.75
0.821117	0.933333	0.933333			0.933333
0.458541	0.928571	0.928571			0.928571
0.954764	1	1			1
0.980096	0.956522	0.956522				0.956522
0.511102	1	1				1
1.01314	0.952381	0.952381				0.952381
0.070697	0.9	0.9				0.9
0.774399	0.866667	0.866667				0.866667
0.204168	0.6	0.6				0.6
1.08669	1	1				1
1.10858	0.92	0.92					0.92
0.541754	0.956522	0.956522					0.956522
1.05384	0.909091	0.909091					0.909091
0.377777	0.884615	0.884615					0.884615
0.811006	0.931034	0.931034					0.931034
0.470773	0.857143	0.857143					0.857143
1.10328	0.956522	0.956522					0.956522
0.879693	0.952381	0.952381						0.952381
0.489847	0.9375	0.9375						0.9375
0.884678	0.866667	0.866667						0.866667
0.464183	0.956522	0.956522						0.956522
0.744548	0.947368	0.947368						0.947368
0.730782	1	1						1
0.781185	0.882353	0.882353						0.882353
1.10682	0.9375	0.9375							0.9375
0.67678	0.96	0.96							0.96
0.835559	0.9	0.9							0.9
0.342477	0.909091	0.909091							0.909091
0.502016	0.962963	0.962963							0.962963
0.665191	0.904762	0.904762							0.904762
0.952649	1	1							1
0.861024	1	1								1
0.867106	0.92	0.92								0.92
0.767411	0.909091	0.909091								0.909091
0.432582	0.888889	0.888889								0.888889
0.552808	0.964286	0.964286								0.964286
0.541537	0.935484	0.935484								0.935484
0.938154	0.962963	0.962963								0.962963
-0.25192	0.428571										0.428571	0.428571
-0.46723	0.333333										0.333333	0.333333
-0.29723	0.333333										0.333333	0.333333
-0.45224	0.142857										0.142857	0.142857
-0.20371	0.222222										0.222222	0.222222
-0.34931	0.125										0.125	0.125
-0.50444	0										0	0
-0.16682	0.333333										0.333333	0.333333
-0.25586	0.25										0.25		0.25
-0.08334	0.5										0.5		0.5
-0.42847	0.333333										0.333333		0.333333
-0.36621	0.058824										0.058824		0.058824
-0.34136	0.166667										0.166667		0.166667
-0.34694	0.055556										0.055556		0.055556
-0.56171	0										0		0
-0.1593	0										0		0
-0.0854	0										0			0
-0.15769	0.5										0.5			0.5
-0.21635	0.684211										0.684211			0.684211
-0.14448	0.1										0.1			0.1
-0.21366	0.5										0.5			0.5
-0.34226	0.285714										0.285714			0.285714
-0.51821	0.25										0.25			0.25
-0.21358	0.6										0.6			0.6
-0.2832	0.2										0.2				0.2
0.168024	0.636364										0.636364				0.636364
-0.12504	0.5										0.5				0.5
-0.35908	0.5										0.5				0.5
-0.24035	0.2										0.2				0.2
-0.32694	0.388889										0.388889				0.388889
-0.37631	0.333333										0.333333				0.333333
-0.17712	0.444444										0.444444				0.444444
-0.01528	0.75										0.75					0.75
0.063241	0.846154										0.846154					0.846154
0.10196	0.857143										0.857143					0.857143
-0.14869	0.142857										0.142857					0.142857
-0.28907	0.6										0.6					0.6
-0.33371	0.333333										0.333333					0.333333
-0.40684	0.5										0.5					0.5
-0.28688	0.333333										0.333333					0.333333
0.042391	0.833333										0.833333						0.833333
0.398403	0.875										0.875						0.875
0.300585	0.933333										0.933333						0.933333
0.253423	0.6										0.6						0.6
0.133525	0.6										0.6						0.6
0.139283	0.5										0.5						0.5
-0.14847	0.333333										0.333333						0.333333
-0.05983	0.333333										0.333333						0.333333
0.075181	0.944444										0.944444							0.944444
-0.00548	0.615385										0.615385							0.615385
0.808264	1										1							1
0.806277	1										1							1
0.268048	0.666667										0.666667							0.666667
0.368049	0.428571										0.428571							0.428571
-0.19412	0.5										0.5							0.5
0.432371	0.2										0.2							0.2
0.261234	1										1								1
0.314045	0.928571										0.928571								0.928571
0.639868	1										1								1
1.02263	1										1								1
0.453424	0.2										0.2								0.2
1.26721	0.5										0.5								0.5
-0.08811	0.666667										0.666667								0.666667
0.72065	0.4										0.4								0.4
